# Supplementary material for: Base-promoted triple cleavage of CCl2Br: a direct one-pot synthesis of unsymmetrical oxalamide derivatives
Source: Royal Society of Chemistry journal article supplement (doi:10.1039/d4cc00354c), 2024-01-01

## Supporting Information

### Base-promoted triple cleavage of CCl<sub>2</sub>Br: A direct one-pot synthesis of unsymmetrical oxalamide derivatives

Alageswaran Jayaram, <sup>a</sup> Vijay Thavasianandam Seenivasan, <sup>a</sup> Karthick Govindan, <sup>a</sup> Yu- Ming Liu, <sup>a</sup> Nian-Qi Chen, <sup>a</sup> Ting-Wei Yeh, <sup>a</sup> Gokulakannan Venkatachalam, <sup>a</sup> Chien-Hung Li, <sup>a</sup> Tsz-Fai Leung,<sup>d</sup> and Wei-Yu Lin <sup>a-c \*</sup>

[a] Department of Medicinal and Applied Chemistry, Kaohsiung Medical University, Kaohsiung 80708, Taiwan, ROC.

[b] Department of Medical Research, Kaohsiung Medical University Hospital, Kaohsiung 80708, Taiwan, ROC.

[c] Drug Development and Value Creation Research Centre, Kaohsiung Medical University, Taiwan, ROC.

[d] Department of Chemistry, National Sun Yat-sen University, Taiwan, ROC.

\*Corresponding author: Wei-Yu Lin, [wylin@kmu.edu.tw](mailto:wylin@kmu.edu.tw)

## Table of Contents

|           |                                                                                                 |               |
|-----------|-------------------------------------------------------------------------------------------------|---------------|
| <b>1</b>  | <b>General information</b>                                                                      | <b>3</b>      |
| <b>2</b>  | <b>Table S1. Optimization for the reaction conditions</b>                                       | <b>4-5</b>    |
| <b>3</b>  | <b>Table S2. Optimization for 2-bromo-2,2-dichloro-<i>N</i>-methylacetamide derivatives</b>     | <b>5-6</b>    |
| <b>4</b>  | <b>Scheme S1. Gram-scale synthesis and derivatization</b>                                       | <b>6</b>      |
| <b>5</b>  | <b>Scheme S2. Mechanistic studies</b>                                                           | <b>6-8</b>    |
| <b>6</b>  | <b>Scheme S3. Control experiments</b>                                                           | <b>9</b>      |
| <b>7</b>  | <b>Scheme S4. Possible reaction mechanism for amine</b>                                         | <b>10</b>     |
| <b>8</b>  | <b>Scheme S5. Possible reaction mechanism for formamide</b>                                     | <b>10</b>     |
| <b>9</b>  | <b>Synthesis of starting materials (1a-s)</b>                                                   | <b>11</b>     |
| <b>10</b> | <b>Experimental procedure 2-morpholino-2-oxo derivatives (3a-3p), amine derivatives (5a-5j)</b> | <b>11</b>     |
| <b>11</b> | <b>Experimental procedure formamide derivatives (5a, 5k – 5p):</b>                              | <b>12</b>     |
| <b>12</b> | <b>Experimental procedure for bromodichloro-<i>N</i>-methyl derivatives (6a-r)</b>              | <b>12</b>     |
| <b>13</b> | <b>Gram-scale synthesis</b>                                                                     | <b>12-13</b>  |
| <b>14</b> | <b>Experimental procedure indoline-2,3-dione derivatives (3aa):</b>                             | <b>14</b>     |
| <b>15</b> | <b>Scheme S6. Triple cleavage of CCl<sub>2</sub>Br in Continuous-flow method</b>                | <b>14-15</b>  |
| <b>16</b> | <b>Spectral characterization</b>                                                                | <b>16-31</b>  |
| <b>17</b> | <b>Reference</b>                                                                                | <b>32</b>     |
| <b>18</b> | <b><sup>1</sup>H and <sup>13</sup>C spectra</b>                                                 | <b>33-160</b> |

## 1. General information

All chemicals were purchased from commercial providers (Sigma Aldrich, Alfa Aesar, TCI, and Matrix Scientific) and used directly without further purification unless otherwise noted. Well-cleaned and oven dried glassware was used for the experiments. The reaction was monitored by Thin Layer Chromatography (TLC), purchased as pre-coated with silica gel 60 F254 from Merck. Column chromatography was carried out using the silica gel 230-400 mesh (purchased from Merck) with a mixture of ethyl acetate/hexane or hexane as the eluent.  $^1\text{H}$  NMR spectra were recorded on 400 MHz and 600 MHz,  $^{13}\text{C}$ -NMR spectra were recorded on 100 MHz and 151 MHz, and Varian mercury, Mercury plus, Unity plus, Jeol, and VNMR spectrometer using  $\text{CDCl}_3$  or  $\text{DMSO}-d_6$  as solvent. The spectra were recorded and presented in chemical shifts (ppm) with tetramethylsilane (TMS) used as an internal standard. Multiplicities were provided in s (singlet), d (doublet), t (triplet), q (quartet), bs (broad singlet), m (multiplet) and dd (doublet of doublet), dq (doublet of quartets), td (triplet of doublets), Coupling constants ( $J$ ) were reported in Hz. All the compounds were characterized by ESI mass on Thermo Finnigan (TRACEGC- POLARISQ) and HRMS (HR-ESI and HR-EI mode) on the JMS-700 spectrometer. Melting points were determined using Fargo instruments.

2. Table S1. Optimization for the reaction conditions <sup>a-k</sup>

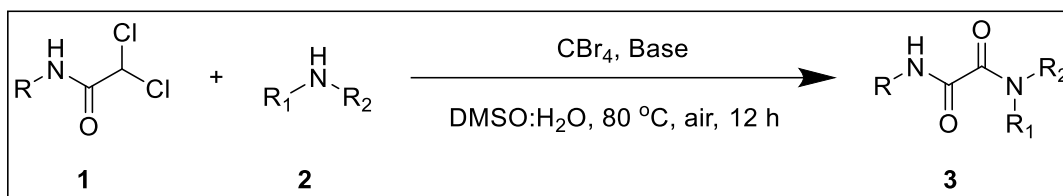

| Entry    | Morpholine (equiv.) | CBr <sub>4</sub> (equiv.) | Base (equiv.)                           | Solvent            | Yield (%) <sup>b</sup>      |
|----------|---------------------|---------------------------|-----------------------------------------|--------------------|-----------------------------|
| 1        | 2                   | 1.5                       | LiOH (2)                                | DMSO               | 45                          |
| 2        | 2                   | 1.5                       | NaOH (2)                                | DMSO               | 73                          |
| 3        | 2                   | 1.5                       | Na <sub>2</sub> CO <sub>3</sub> (2)     | DMSO               | 63                          |
| 4        | 2                   | 1.5                       | NaHCO <sub>3</sub> (2)                  | DMSO               | 47                          |
| <b>5</b> | <b>2</b>            | <b>1.5</b>                | <b>Cs<sub>2</sub>CO<sub>3</sub> (2)</b> | <b>DMSO</b>        | <b>90 (85) <sup>c</sup></b> |
| 6        | 2                   | 1.5                       | K <sub>2</sub> HPO <sub>4</sub> (2)     | DMSO               | 6                           |
| 7        | 2                   | 1.5                       | TEA (2)                                 | DMSO               | NR                          |
| 8        | 2                   | 1.5                       | Cs <sub>2</sub> CO <sub>3</sub> (1.5)   | DMSO               | 67                          |
| 9        | 2                   | 1.5                       | Cs <sub>2</sub> CO <sub>3</sub> (1.0)   | DMSO               | 34                          |
| 10       | 2                   | 1.5                       | -                                       | DMSO               | 11                          |
| 11       | 2                   | -                         | Cs <sub>2</sub> CO <sub>3</sub> (2)     | DMSO               | 10                          |
| 12       | 2                   | 1                         | Cs <sub>2</sub> CO <sub>3</sub> (2)     | DMSO               | 50                          |
| 13       | 2                   | 2                         | Cs <sub>2</sub> CO <sub>3</sub> (2)     | DMSO               | 89                          |
| 14       | 1.5                 | 1.5                       | Cs <sub>2</sub> CO <sub>3</sub> (2)     | DMSO               | 64                          |
| 15       | 2.5                 | 1.5                       | Cs <sub>2</sub> CO <sub>3</sub> (2)     | DMSO               | 78                          |
| 16       | 2                   | 1.5                       | Cs <sub>2</sub> CO <sub>3</sub> (2)     | DMSO               | 17 <sup>d</sup>             |
| 17       | 2                   | 1.5                       | Cs <sub>2</sub> CO <sub>3</sub> (2)     | H <sub>2</sub> O   | NR                          |
| 18       | 2                   | 1.5                       | Cs <sub>2</sub> CO <sub>3</sub> (2)     | CH <sub>3</sub> CN | 21                          |
| 19       | 2                   | 1.5                       | Cs <sub>2</sub> CO <sub>3</sub> (2)     | MeOH               | 25                          |
| 20       | 2                   | 1.5                       | Cs <sub>2</sub> CO <sub>3</sub> (2)     | EtOH               | 42                          |
| 21       | 2                   | 1.5                       | Cs <sub>2</sub> CO <sub>3</sub> (2)     | Acetone            | NR                          |
| 22       | 2                   | 1.5                       | Cs <sub>2</sub> CO <sub>3</sub> (2)     | DMSO               | 37 <sup>e</sup>             |
| 23       | 2                   | 1.5                       | Cs <sub>2</sub> CO <sub>3</sub> (2)     | DMSO               | 76 <sup>f</sup>             |
| 24       | 2                   | 1.5                       | Cs <sub>2</sub> CO <sub>3</sub> (2)     | DMSO               | 66 <sup>g</sup>             |
| 25       | 2                   | 1.5                       | Cs <sub>2</sub> CO <sub>3</sub> (2)     | DMSO               | 50 <sup>h</sup>             |
| 26       | 2                   | 1.5                       | Cs <sub>2</sub> CO <sub>3</sub> (2)     | DMSO               | 77 <sup>i</sup>             |
| 27       | 2                   | 1.5                       | Cs <sub>2</sub> CO <sub>3</sub> (2)     | DMSO               | 61 <sup>j</sup>             |
| 28       | 2                   | 1.5                       | Cs <sub>2</sub> CO <sub>3</sub> (2)     | DMSO               | 67 <sup>k</sup>             |

<sup>a</sup> The reactions were performed with **1a** (0.2 mmol scale), CBr<sub>4</sub> (equiv.), Base (equiv.), DMSO: H<sub>2</sub>O (1:0.2) 2mL, at 80 °C under open air for 12 h. <sup>b</sup> Yields were determined by <sup>1</sup>H NMR spectroscopy using 1,3,5- trimethoxybenzene as the internal standard, <sup>c</sup> isolated yield, <sup>d</sup> without H<sub>2</sub>O, <sup>e</sup> reaction was performed at room temperature, <sup>f</sup> 70 °C, <sup>g</sup> 90 °C, <sup>h</sup> 300 μL of H<sub>2</sub>O, <sup>i</sup> 500 μL of H<sub>2</sub>O, <sup>j</sup> reaction was performed under N<sub>2</sub> atmosphere, <sup>k</sup> reaction was performed under O<sub>2</sub> atmosphere; NR = no reaction.

### 3. Table S2. Optimization for 2-bromo-2,2-dichloro-*N*-methylacetamide derivatives <sup>a-b</sup>

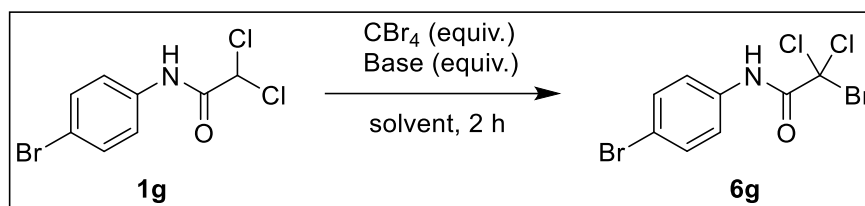

| Entry     | CBr <sub>4</sub> (equiv.) | Base                                         | solvent                 | Yield (%) <sup>b</sup> |
|-----------|---------------------------|----------------------------------------------|-------------------------|------------------------|
| <b>1</b>  | 1.5                       | LiOH                                         | CH <sub>3</sub> CN      | 87                     |
| <b>2</b>  | 1.5                       | NaOH                                         | CH <sub>3</sub> CN      | 95                     |
| <b>3</b>  | 1.5                       | K <sub>2</sub> CO <sub>3</sub>               | CH <sub>3</sub> CN      | 53                     |
| <b>4</b>  | <b>1.5</b>                | <b>Cs<sub>2</sub>CO<sub>3</sub></b>          | <b>CH<sub>3</sub>CN</b> | <b>98</b>              |
| <b>5</b>  | 1.5                       | Et <sub>3</sub> N                            | CH <sub>3</sub> CN      | 28                     |
| <b>6</b>  | 1.5                       | -                                            | CH <sub>3</sub> CN      | NR                     |
| <b>7</b>  | 1.5                       | Cs <sub>2</sub> CO <sub>3</sub> (1.5 equiv.) | CH <sub>3</sub> CN      | 84                     |
| <b>8</b>  | 1.5                       | Cs <sub>2</sub> CO <sub>3</sub> (1.0 equiv.) | CH <sub>3</sub> CN      | 79                     |
| <b>9</b>  | 1.5                       | Cs <sub>2</sub> CO <sub>3</sub> (0.5 equiv.) | CH <sub>3</sub> CN      | 65                     |
| <b>10</b> | 1.5                       | Cs <sub>2</sub> CO <sub>3</sub>              | H <sub>2</sub> O        | NR.                    |
| <b>11</b> | 1.5                       | Cs <sub>2</sub> CO <sub>3</sub>              | MeOH                    | 52                     |
| <b>12</b> | 1.5                       | Cs <sub>2</sub> CO <sub>3</sub>              | ethyl acetate           | 89                     |
| <b>13</b> | 1.5                       | Cs <sub>2</sub> CO <sub>3</sub>              | toluene                 | trace                  |
| <b>14</b> | 1.5                       | Cs <sub>2</sub> CO <sub>3</sub>              | acetone                 | trace                  |
| <b>15</b> | 1.5                       | Cs <sub>2</sub> CO <sub>3</sub>              | DMSO                    | 90                     |
| <b>16</b> | 1.0                       | Cs <sub>2</sub> CO <sub>3</sub>              | CH <sub>3</sub> CN      | 87                     |
| <b>17</b> | 0.5                       | Cs <sub>2</sub> CO <sub>3</sub>              | CH <sub>3</sub> CN      | 53                     |
| <b>18</b> | NBS                       | Cs <sub>2</sub> CO <sub>3</sub>              | CH <sub>3</sub> CN      | 20                     |

<sup>a</sup> The reactions were performed with **1g** (0.20 mmol), CBr<sub>4</sub> (1.5 equiv.), Base (2.0 equiv.) at room temperature under open air for 2 h, <sup>b</sup> Isolated yield. NR= no reaction.

#### 4. Scheme S1. Gram-scale synthesis and derivatization

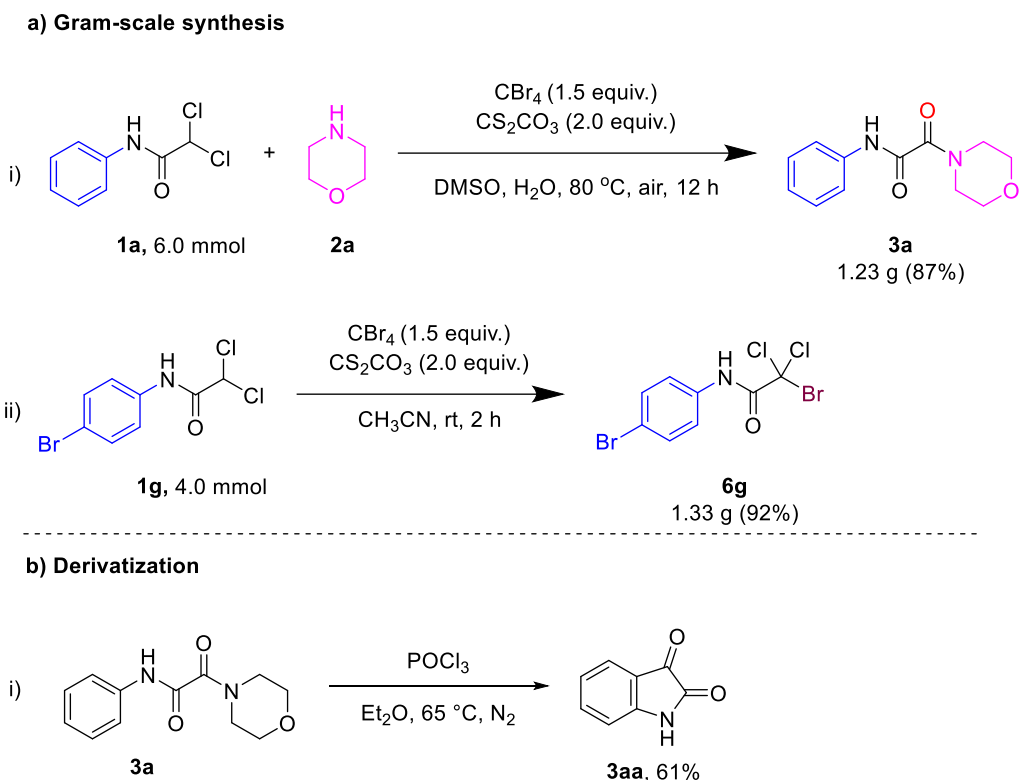

#### 5. Scheme S2. Mechanistic studies

##### i) Identification of intermediates

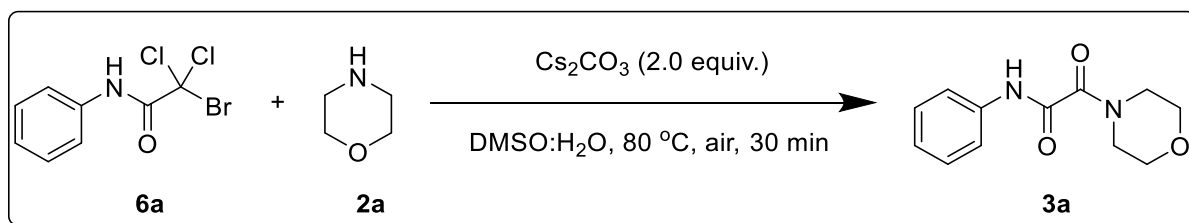

A 15 mL reaction tube was charged with (**6a**) (0.2 mmol, 1.0 equiv.), morpholin (**2a**), (0.4 mmol, 2.0 equiv.), CS<sub>2</sub>CO<sub>3</sub> (0.4 mmol, 2.0 equiv.) with DMSO: H<sub>2</sub>O (1:0.2) (2 mL). The resulting mixture was stirred at 80 °C in the open-air atmosphere for about 30 minutes. Then 0.5 mL of the reaction

solution was added into the test bottle and diluted with 0.5 mL of MeOH. The samples were immediately monitored by LCMS to determine the intermediates I & II.

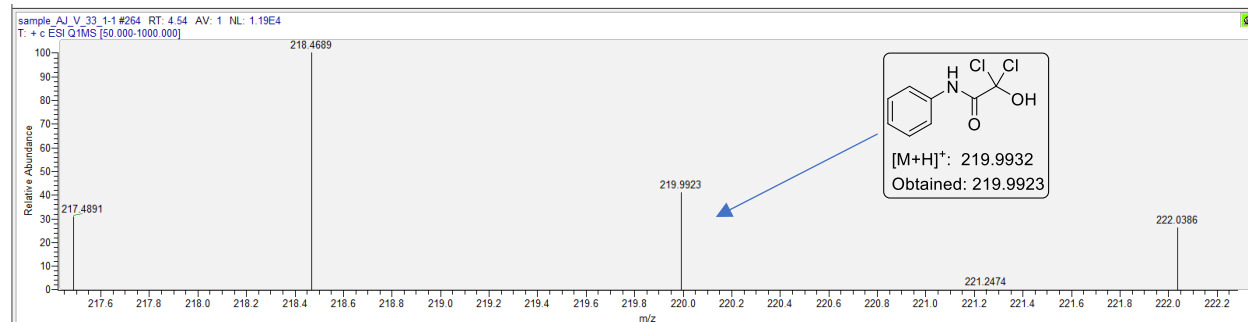

Figure S1. Intermediate I

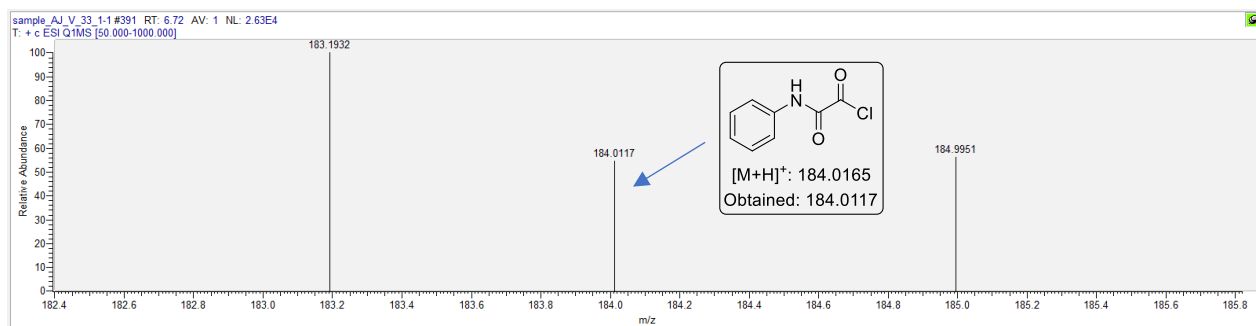

Figure S2. Intermediate II

## ii) <sup>18</sup>O isotope labeling experiments

The <sup>18</sup>O labeling experiment was conducted with **1a** and **2a** under the standard conditions with H<sub>2</sub><sup>18</sup>O and the HRMS of the isolated product **3a** indicated that the oxygen atoms in carbonyl originated from H<sub>2</sub>O.

AJ-V-43-WYL (HR-ELI)

[Mass Spectrum]  
 Data: 20231225\_AJ-V-43-WYL-HR-002 Date: 25-Dec-2023 15:47  
 Sample: AJ-V-43-WYL  
 Note: 70eV  
 Ion Mode: EI+  
 RT: 0.43 min Scan#: 6  
 Elements: C 12/12, H 1000/0, N 2/2, 16O 3/1, 18O 3/0  
 Mass Tolerance: 10mmu  
 Unsaturation (U.S.): -0.5 - 10000.0

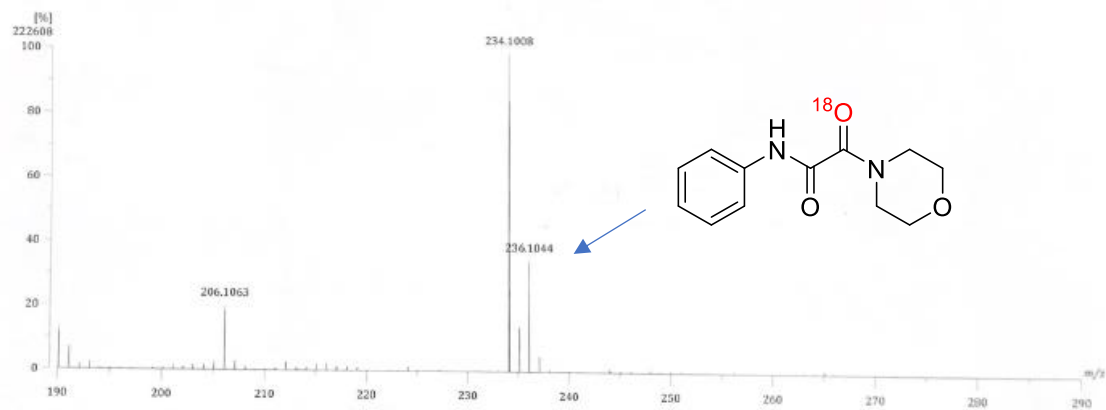

| Observed m/z  | Int%            |      |    |    |   |     |     |
|---------------|-----------------|------|----|----|---|-----|-----|
| 234.1008      | 100.00          |      |    |    |   |     |     |
| Estimated m/z | Err [ppm / mmu] | U.S. | C  | H  | N | 16O | 18O |
| 1 234.1004    | +1.5 / +0.6     | 7.0  | 12 | 14 | 2 | 3   | -   |
| Observed m/z  | Int%            |      |    |    |   |     |     |
| 236.1044      | 35.09           |      |    |    |   |     |     |
| Estimated m/z | Err [ppm / mmu] | U.S. | C  | H  | N | 16O | 18O |
| 2 236.1047    | -1.2 / -0.3     | 7.0  | 12 | 14 | 2 | 2   | 1   |

## 6. Scheme S3. Control experiments

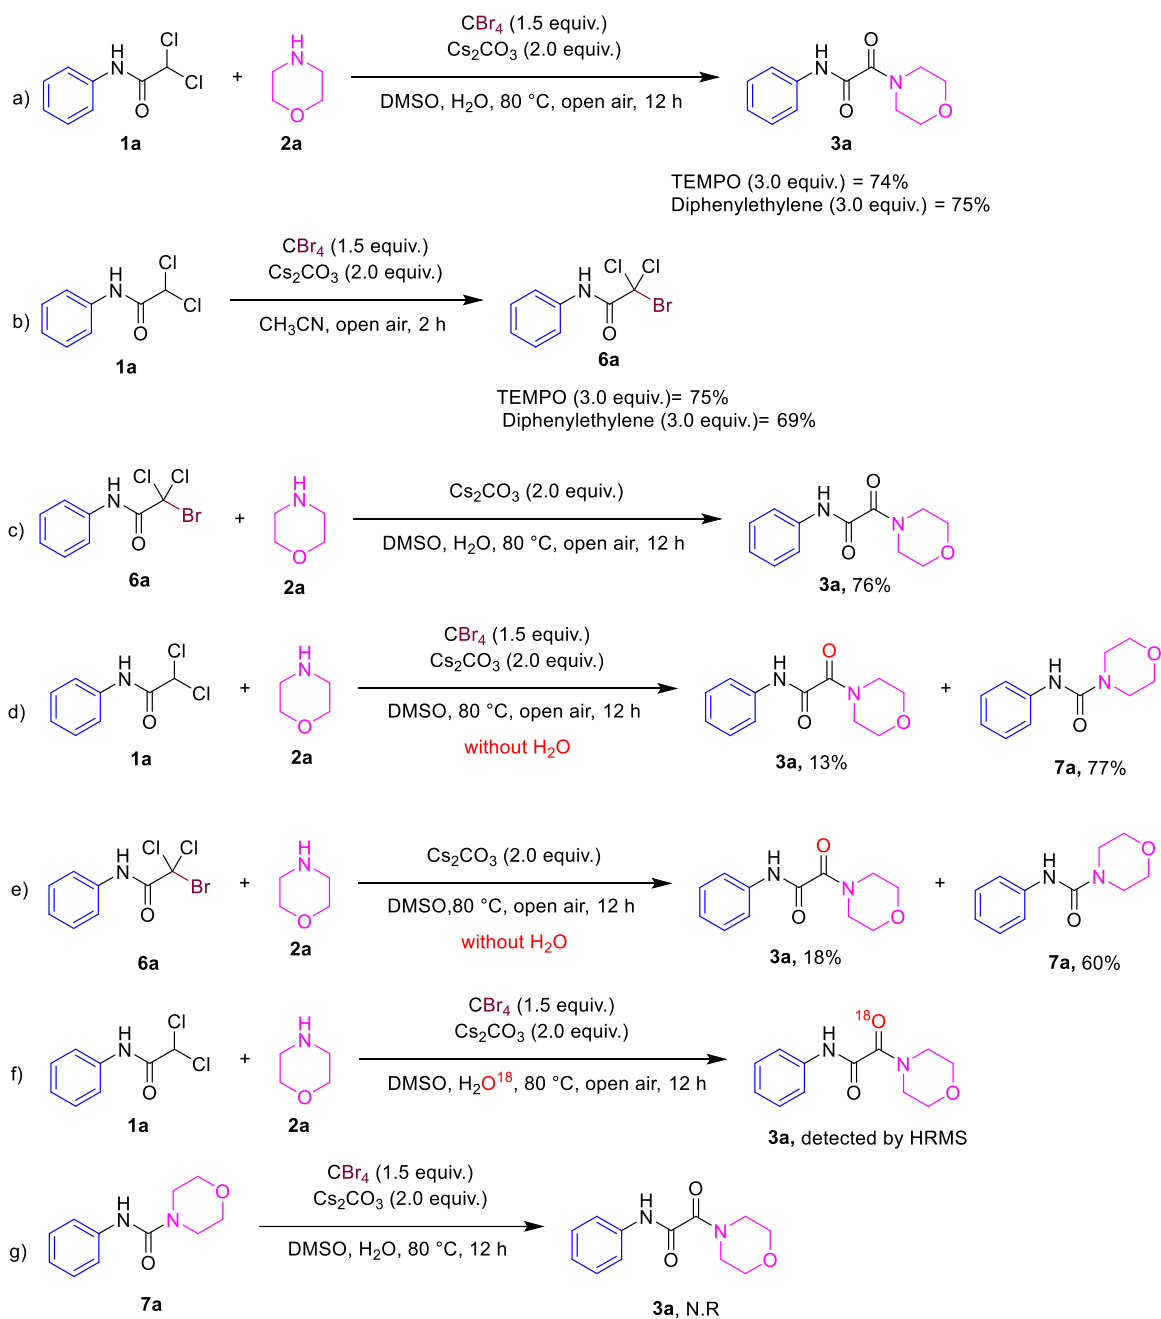

## 7. Scheme S4. Possible reaction mechanism for amine

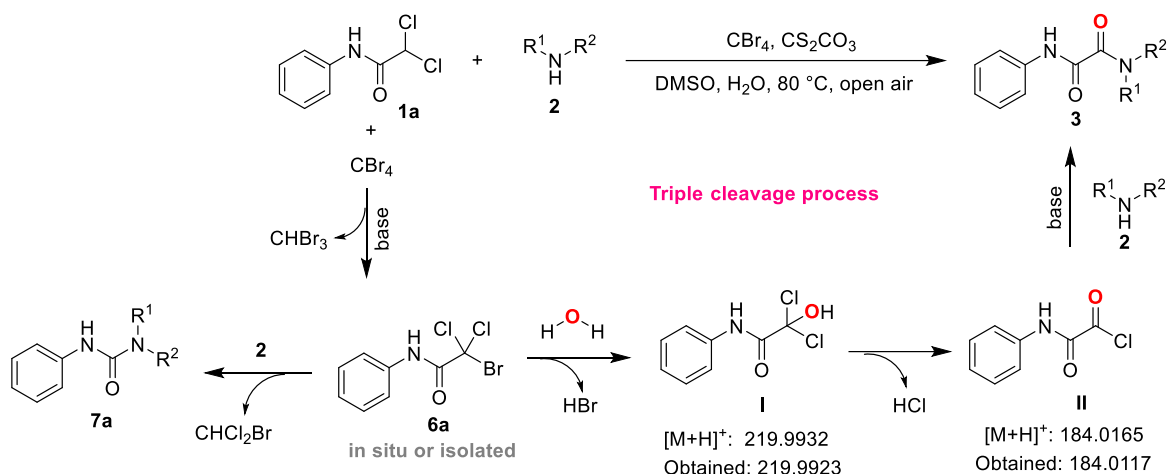

2,2-dichloro-*N*-phenylacetamide (**1a**) undergoes electrophilic bromination upon reaction with  $\text{CBr}_4$  under basic conditions, leading to the formation of intermediate **6a**. Subsequently, the bromodichloroacetamide **6a** undergoes hydrolysis to generate intermediate **I**, which is further converted into intermediate **II** through the elimination of  $\text{HCl}$ . Finally, the reactive intermediate **II** with an amine in the presence of a base yields an oxalamide product (**3a**).

## 8. Scheme S4. Possible reaction Mechanism for formamide

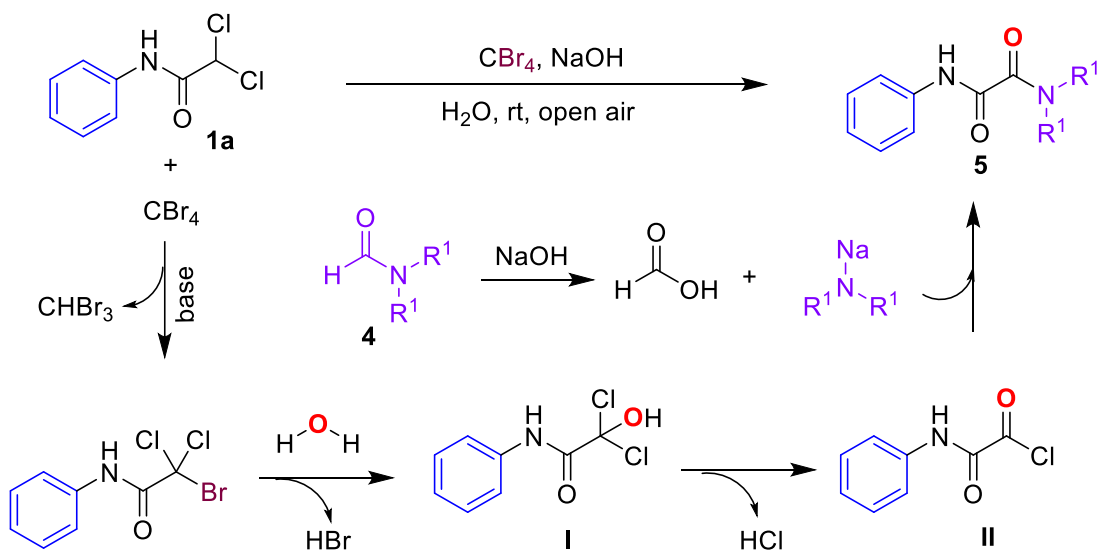

## 9. Synthesis of starting materials (1a-s): <sup>1</sup>

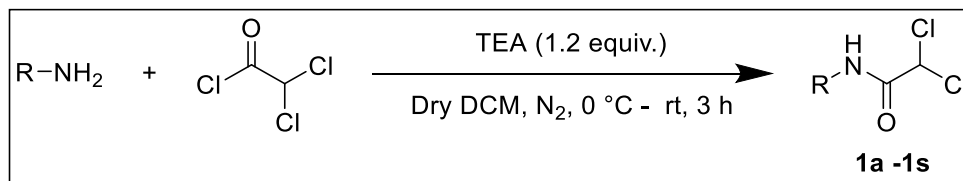

All the starting materials (**1a-s**) were synthesized on 3.0 mmol scale, according to the literature procedure, and obtained in 20% - 93% yield, unless otherwise noted. The <sup>1</sup>H-NMR spectra of known starting materials were matched with previous literature and the unknown starting materials were characterized.

## 10. Experimental procedure 2-morpholino-2-oxo derivatives (3a-3p), & amine derivatives (5a-5j):

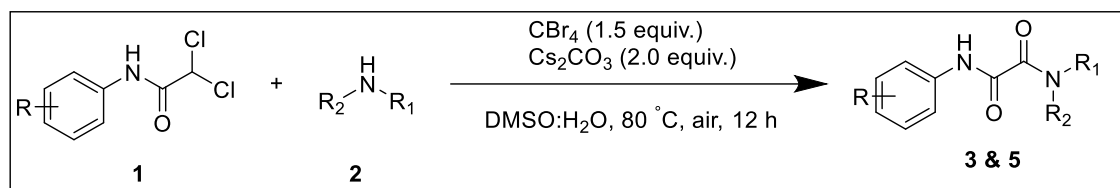

A 15 mL reaction tube was charged with (**1a-s**) (0.2 mmol, 1.0 equiv.), CBr<sub>4</sub> (0.4 mmol, 1.5 equiv.), Cs<sub>2</sub>CO<sub>3</sub> (0.4 mmol, 2.0 equiv.), amine (0.4 mmol, 2.0 equiv.), with DMSO: H<sub>2</sub>O (1:0.2) (2 mL). The resulting mixture was stirred at 80 °C in the open-air atmosphere for about 12 h. After the completion of the reaction, reaction mixture was diluted with 5 mL of water. The aqueous layer was extracted with Ethyl acetate (3 × 10 mL), and the combined organic layer was washed with brine solution (1 × 5 mL). The final organic layer was then dried over MgSO<sub>4</sub> and concentrated under reduced pressure to get the crude product. The obtained crude product was purified using column chromatography by eluting with ethyl acetate/hexane (3:7) to afford pure 2-morpholino-2-oxo derivatives (**3a-p**) up to 29-91% yields and pure amine derivatives (**5a-5j**) up to 55-81% yields.

### 11. Experimental procedure formamide derivatives (5a, 5k – 5p):

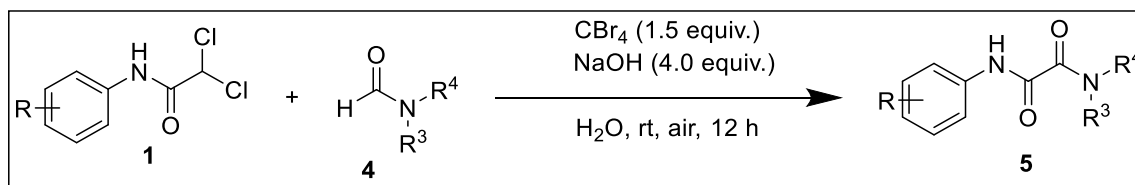

A 15 mL reaction tube was charged with (**1a**, **1b**, **1d**, **1f**, **1g**) (0.2 mmol, 1.0 equiv.), CBr<sub>4</sub> (0.3 mmol, 1.5 equiv.), NaOH (0.8 mmol, 4.0 equiv.), formamides (1 mL) with H<sub>2</sub>O (500  $\mu$ L). The resulting mixture was stirred at 25-30 °C in the open-air atmosphere for about 12 h. After the completion of the reaction, reaction mixture was diluted with 5 mL of water. The aqueous layer was extracted with Ethyl acetate (3  $\times$  10 mL), and the combined organic layer was washed with brine solution (1  $\times$  5 mL). The final organic layer was then dried over MgSO<sub>4</sub> and concentrated under reduced pressure to get the crude product. The obtained crude product was purified using column chromatography by eluting with ethyl acetate/hexane (3:7) to afford pure oxalamide derivatives (**5a**, **5k-5p**) up to 41-88% yields

### 12. Experimental procedure for bromodichloro-*N*-methyl derivatives (6a-r):

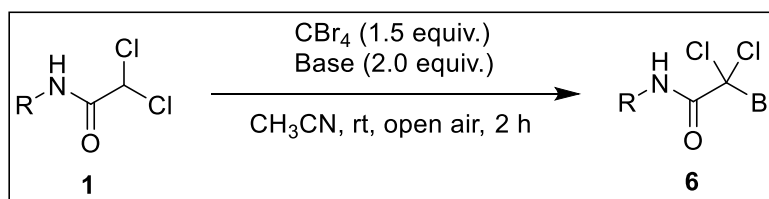

A 15 mL reaction tube was charged with (**1a-r**) (0.2 mmol, 1.0 equiv.), CBr<sub>4</sub> (0.3 mmol, 1.5 equiv.), CS<sub>2</sub>CO<sub>3</sub> (0.4 mmol, 2.0 equiv.) with CH<sub>3</sub>CN (2 mL). The resulting mixture was stirred at 25-30 °C in the open-air atmosphere for about 2 h. After the completion of the reaction, reaction mixture was diluted with 5 mL of water. The aqueous layer was extracted with Ethyl acetate (3  $\times$  10 mL), and the combined organic layer was washed with brine solution (1  $\times$  5 mL). The final organic layer was then dried over MgSO<sub>4</sub> and concentrated under reduced pressure to get the crude product. The obtained crude product was purified using column chromatography by eluting with ethyl acetate/hexane (1:9) to afford pure 2-bromo-2,2-dichloro-*N*-methyl derivatives (**6a-r**) up to 18-98% yields.

### 13. General procedure for Gram-scale synthesis

#### i) Experimental Procedure for Gram-Scale Synthesis of 2-morpholino-2-oxo-*N*-phenylacetamide (**3a**):

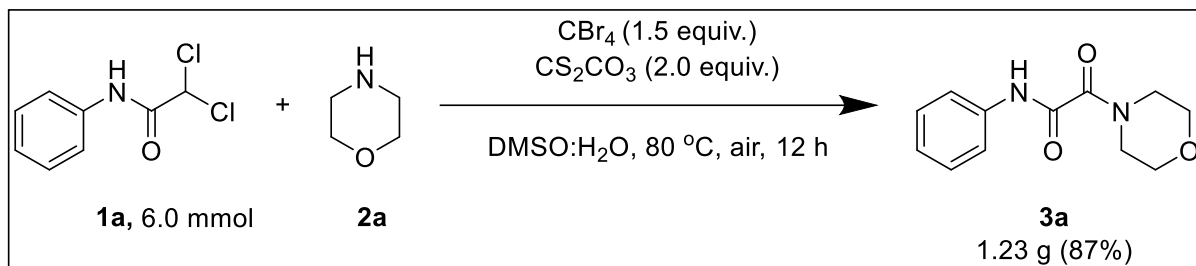

A 100 mL round-bottom flask was charged with (**1a**) (6.0 mmol, 1.0 equiv.),  $\text{CBr}_4$  (9 mmol, 1.5 equiv.),  $\text{CS}_2\text{CO}_3$  (12 mmol, 2.0 equiv.) with  $\text{DMSO}:\text{H}_2\text{O}$  (1:0.2) (60 mL). The resulting mixture was stirred at  $80^\circ\text{C}$  in the open-air atmosphere for about 12 h. After the completion of the reaction, the reaction mixture was diluted with 100 mL of water. The aqueous layer was extracted with Ethyl acetate ( $3 \times 100\text{ mL}$ ), and the combined organic layer was washed with brine solution ( $1 \times 100\text{ mL}$ ). The final organic layer was then dried over  $\text{MgSO}_4$  and concentrated under reduced pressure to get the crude product. The obtained crude product was purified using column chromatography by eluting with ethyl acetate/hexane (3:7) to afford pure 2-morpholino-2-oxo-*N*-phenylacetamide (**3a**) 87% yields.

#### ii) Experimental Procedure for Gram-Scale Synthesis of 2-bromo-*N*-(4-bromophenyl)-2,2-dichloroacetamide (**6g**):

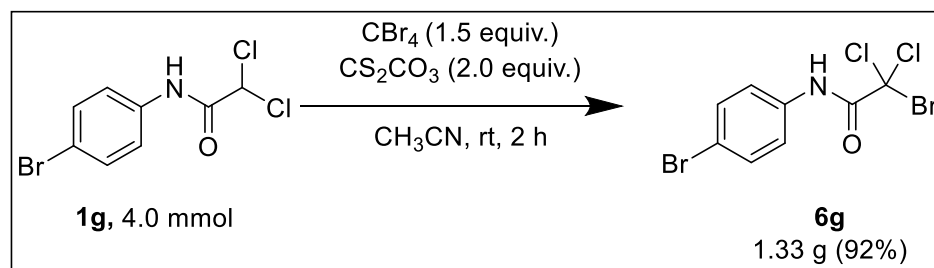

A 100 mL round-bottom flask was charged with (**1a**) (4 mmol, 1.0 equiv.),  $\text{CBr}_4$  (6 mmol, 1.5 equiv.),  $\text{CS}_2\text{CO}_3$  (8 mmol, 2.0 equiv.) with  $\text{CH}_3\text{CN}$  (40 mL). The resulting mixture was stirred at  $25-30^\circ\text{C}$  in the open-air atmosphere for about 2 h. After the completion of the reaction, the reaction mixture was diluted with 100 mL of water. The aqueous layer was extracted with Ethyl acetate

(3 × 100 mL), and the combined organic layer was washed with brine solution (1 × 100 mL). The final organic layer was then dried over MgSO<sub>4</sub> and concentrated under reduced pressure to get the crude product. The obtained crude product was purified using column chromatography by eluting with ethyl acetate/hexane (1:9) to afford pure 2-bromo-2,2-dichloro-*N*-methyl derivatives (**6g**) 92% yield.

#### 14. Experimental procedure indoline-2,3-dione derivatives (**3aa**): <sup>2</sup>

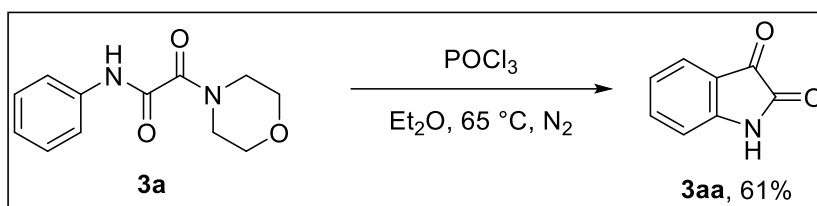

A mixture of 2-morpholino-2-oxo-*N*-phenylacetamide **3a** (46.85 mg, 0.2 mmol), POCl<sub>3</sub> (5.0 ml) was stirred at room temperature for 5 min. Then, transfer the reaction liquid to 65 °C and stir overnight under argon. After disappearance of the reactant (monitored by TLC), the reaction liquid was poured into 20 ml ice water and extracted with ethyl acetate three times (3 × 25 mL). The organic layer was washed with water and saturated brine, dried over MgSO<sub>4</sub> and evaporation. The residue was purified by column chromatography on silica gel (eluent: petroleum ether/ethyl acetate) to afford the pure *N*<sup>1</sup>, *N*<sup>1</sup>-dimethyl-*N*<sup>2</sup>-phenyloxalamide derivatives (**3aa**) as an orange solid.

#### 15. Scheme S6. Triple cleavage of CCl<sub>2</sub>Br in Continuous-flow method

##### i) Optimization for the reaction conditions

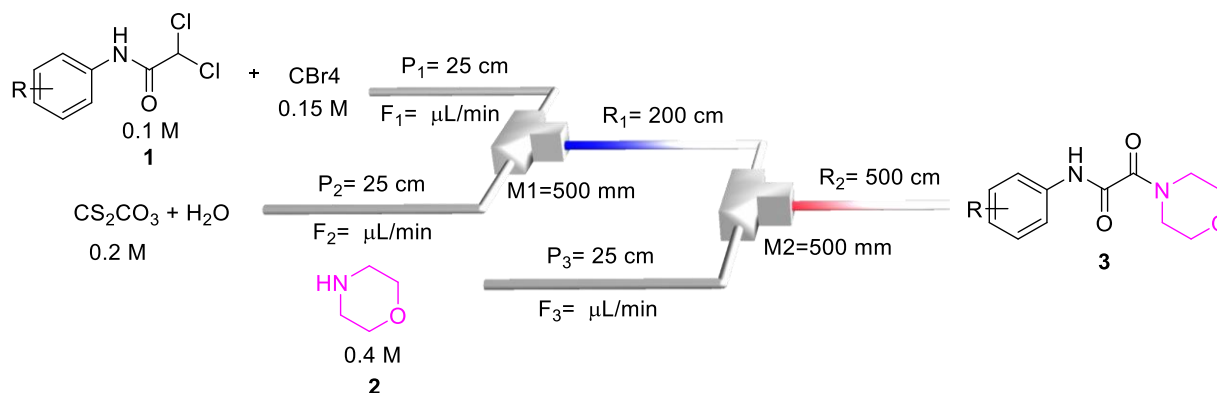

| Entry | Flow rate (F1:F2: F3)<br>$\mu\text{L min}^{-1}$ | Temperature (T1 :X °C) | Conversion yield (%) | Reaction time (min) |
|-------|-------------------------------------------------|------------------------|----------------------|---------------------|
| 1     | (20:20:20)                                      | 80                     | 85                   | 42                  |
| 2     | (20:25:20)                                      | 80                     | 90                   | 40                  |
| 3     | (30:35:30)                                      | 80                     | 85                   | 30                  |
| 4     | (40:45:40)                                      | 80                     | 75                   | 20                  |
| 5     | (30:35:30)                                      | 70                     | 85                   | 30                  |
| 6     | (30:35:30)                                      | 60                     | 84                   | 30                  |
| 7     | (30:35:30)                                      | 50                     | 70                   | 30                  |

## ii) General procedure

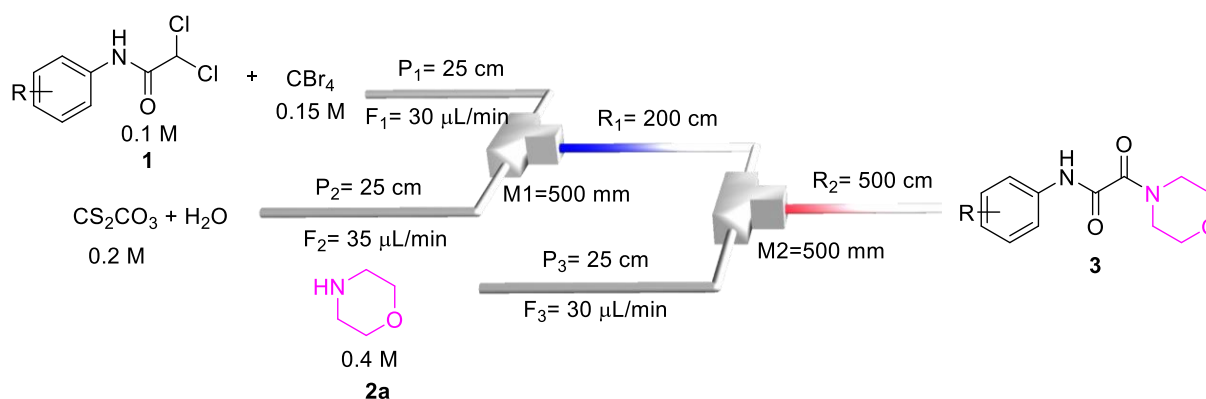

A microreactor system consist of two T-shaped micromixers (M1 and M2), two tubing reactors (R1 and R2) and three reagents delivering units P1 (inner diameter = 800  $\mu\text{m}$ , length L = 25 cm), P2 (inner diameter = 800  $\mu\text{m}$ , length L= 25 cm) and, P3 (inner diameter = 800  $\mu\text{m}$ , length L= 25 cm) were used. A solution of **1** (0.1 M in DMSO) and  $\text{CBr}_4$  (0.15 M in DMSO) and a solution of  $\text{Cs}_2\text{CO}_3$  (0.2 M in  $\text{H}_2\text{O}$ ) was introduced to M1 (M1,  $\Phi$  = 500  $\mu\text{m}$ ) by syringe pumps. The resulting solution was passed through R1 ( $\Phi$  = 0.8 mm, L= 200 cm) and was mixed with a solution of morpholine **2a** (0.4 M in DMSO) (flow rate: 30  $\mu\text{L/min}$ ) at M2 ( $\Phi$ = 500  $\mu\text{m}$ ). The resulting solution was passed through R2 ( $\Phi$ = 0.8 mm, L= 500 cm) at 80 °C. After a steady state was reached (after 1 min), the final product solution was collected for 15 minutes in vial. The reaction mixture was analyzed by GC with 85% conversion, the solution was extracted with ethyl acetate. The organic phase was dried with  $\text{MgSO}_4$ , and the solvent was removed by vacuum. The crude product was purified by column chromatography (Hexane/EtOAc, 7/3, silica gel) and obtained **3a**, **3b**, and **3f** (84%- 91%).

## 16. Spectral characterization:

**2,2-dichloro-*N*-(4-ethyl phenyl) acetamide (1c):** The title compound was synthesized according

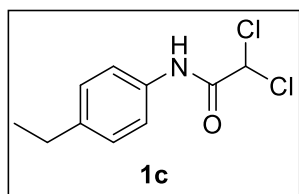

to the general procedure and obtained as white solid (633.6 mg, 91%); mp. 148-150 °C;  $^1\text{H-NMR}$  (400 Hz,  $\text{CDCl}_3$ )  $\delta$  8.15 (s, 1H), 7.46 (d,  $J$  = 8.0 Hz, 2H), 7.20 (d,  $J$  = 8.0 Hz, 2H), 6.04 (s, 1H), 2.64 (q,  $J$  = 8.0 Hz, 2H), 1.23 (t,  $J$  = 8.0 Hz, 3H);  $^{13}\text{C-NMR}$  (100 MHz,  $\text{CDCl}_3$ )  $\delta$  162.33, 142.53, 134.41, 129.15, 120.99, 67.50, 28.95, 16.18; HRMS (HR-EI)  $m/z$ :  $[\text{M}^+]$  calcd for  $\text{C}_{10}\text{H}_{12}\text{Cl}_2\text{NO}$  232.0296; Found 232.0285.

***N*-(4-bromophenyl)-2,2-dichloroacetamide (1g):** The title compound was synthesized according

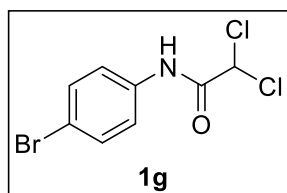

to the general procedure and obtained as white solid (704.5 mg, 83%); mp. 160-162 °C;  $^1\text{H-NMR}$  (400 Hz,  $\text{CDCl}_3$ )  $\delta$  8.14 (s, 1H), 7.47 (q,  $J$  = 8.0 Hz, 4H), 6.04 (s, 1H);  $^{13}\text{C-NMR}$  (100 MHz,  $\text{CDCl}_3$ )  $\delta$  162.09, 135.64, 132.60, 122.12, 118.92, 67.06; HRMS (HR-EI)  $m/z$ :  $[\text{M}^+]$  calcd for  $\text{C}_8\text{H}_6\text{BrCl}_2\text{NO}$  280.9010; Found 280.9005

**2,2-dichloro-*N*-(2-iodophenyl)acetamide (1i):** The title compound was synthesized according

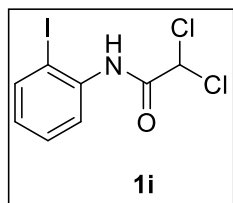

to the general procedure and obtained as white solid (781.9mg, 79%); mp. 165-167 °C;  $^1\text{H-NMR}$  (400 Hz,  $\text{CDCl}_3$ )  $\delta$  8.63 (s, 1H), 8.19 (dd,  $J$  = 8.0 Hz, 4.0 Hz, 1H), 7.83 (dd,  $J$  = 8.0 Hz, 4.0 Hz, 1H), 7.41-7.37 (m, 1H), 6.95-6.91 (m, 1H), 6.61 (s, 1H);  $^{13}\text{C-NMR}$  (100 MHz,  $\text{CDCl}_3$ )  $\delta$  162.09, 139.27, 136.91, 129.57, 127.30, 121.91, 90.30, 67.14; HRMS (HR-ESI)  $m/z$ :  $[\text{M}+\text{Na}]^+$  calcd for  $\text{C}_8\text{H}_6\text{Cl}_2\text{INO}$  351.8769; Found 351.8761

**2,2-dichloro-*N*-(4-chloro-3-nitrophenyl) acetamide (1m):** The title compound was synthesized

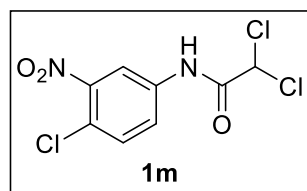

according to the general procedure and obtained as yellow solid (289.1 mg, 34%); mp. 134-136 °C;  $^1\text{H-NMR}$  (400 Hz,  $\text{CDCl}_3$ )  $\delta$  8.31 (s, 1H), 8.22 (d,  $J$  = 4.0 Hz, 1H), 7.75 (dd,  $J$  = 8.0 Hz, 4.0 Hz, 1H), 7.54 (d,  $J$  = 8.0 Hz, 1H), 6.04 (s, 1H);  $^{13}\text{C-NMR}$  (100 MHz,  $\text{CDCl}_3$ )  $\delta$  162.56, 136.28, 132.94, 124.76, 123.65, 117.42, 66.82; HRMS (HR-EI)  $m/z$ :  $[\text{M}^+]$  calcd for  $\text{C}_8\text{H}_5\text{Cl}_3\text{N}_2\text{O}_3$  281.9366; Found 281.9366.

**2,2-dichloro-*N*-(quinolin-3-yl) acetamide (1o):** The title compound was synthesized according to

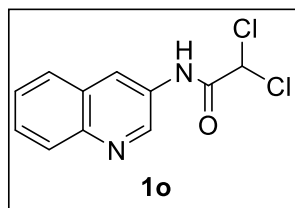

the general procedure and obtained as a pale-yellow solid (344.4 mg, 45%); mp. 163-165 °C;  $^1\text{H-NMR}$  (400 Hz,  $\text{DMSO-}d_6$ )  $\delta$  11.10 (s, 1H), 8.87 (d,  $J$  = 4.0 Hz, 1H), 8.66 (d,  $J$  = 4.0 Hz, 1H), 7.94 (d,  $J$  = 8.0 Hz, 2H), 7.67-7.63 (m, 1H), 7.58-7.54 (m, 1H), 6.66 (s, 1H);  $^{13}\text{C-NMR}$  (100 MHz,  $\text{DMSO-}d_6$ )  $\delta$  163.01, 145.19, 144.89, 131.79, 129.07, 129.03, 128.41, 127.96, 127.78, 124.18, 67.53. HRMS (HR-ESI)  $m/z$ :  $[\text{M}+\text{H}]^+$  calcd for  $\text{C}_{11}\text{H}_9\text{Cl}_2\text{N}_2\text{O}$  255.0092; Found 255.0081.

***N*-(benzo[d]thiazol-2-yl)-2,2-dichloroacetamide (1p):** The title compound was synthesized

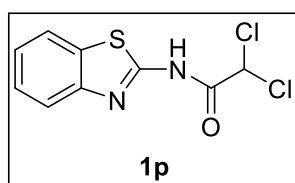

according to the general procedure and obtained as yellow solid (642.4 mg, 82%); mp. 203-205 °C;  $^1\text{H-NMR}$  (400 Hz,  $\text{CDCl}_3$ )  $\delta$  7.87-7.82 (m, 2H), 7.49 (td,  $J$  = 8.0 Hz, 4.0Hz, 1H), 7.38(td,  $J$  = 8.0 Hz, 1.6Hz, 1H), 6.19 (s, 1H);  $^{13}\text{C-NMR}$  (100 MHz,  $\text{CDCl}_3$ )  $\delta$  163.05, 157.87, 147.86, 132.42, 127.12, 125.16, 122.01, 121.46, 65.98. HRMS (HR-ESI)  $m/z$ :  $[\text{M}+\text{H}]^+$  calcd for  $\text{C}_9\text{H}_7\text{Cl}_2\text{N}_2\text{OS}$  260.9656; Found 260.9649.

***N*-(1-benzylpyrrolidin-3-yl)-2,2-dichloroacetamide (1q):** The title compound was synthesized

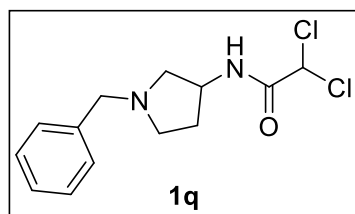

according to the general procedure and obtained as brown semi solid (215.3 mg, 25%);  $^1\text{H-NMR}$  (400 Hz,  $\text{CDCl}_3$ )  $\delta$  7.27 (s, 5H), 5.86 (s, 1H), 4.44-4.37 (m, 1H), 3.64 (s, 2H), 2.98-2.94 (m, 1H), 2.71 (dd,  $J$  = 8.0 Hz, 4.0 Hz, 1H), 2.58 (dd,  $J$  = 8.0 Hz, 4.0 Hz, 1H), 2.36-2.23

(m, 12H), 1.75-1.66 (m, 1H);  $^{13}\text{C-NMR}$  (100 MHz,  $\text{CDCl}_3$ )  $\delta$  163.64, 137.16, 129.07, 128.64, 127.75, 66.54, 59.79, 59.65, 52.42, 49.52, 31.92; HRMS (HR-ESI)  $m/z$ :  $[\text{M}+\text{H}]^+$  calcd for  $\text{C}_{13}\text{H}_{17}\text{Cl}_2\text{N}_2\text{O}$  287.0718; Found 287.0710.

**2,2-dichloro-*N*-(9,10-dioxo-9,10-dihydroanthracen-2-yl)acetamide (1r):** The title compound

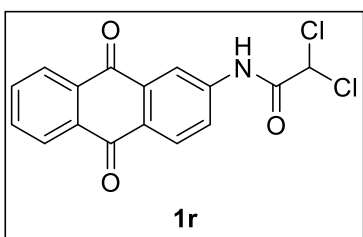

was synthesized according to the general procedure and obtained as brown solid (200.5 mg, 20%); mp. 268-270 °C;  $^1\text{H-NMR}$  (400 Hz,  $\text{DMSO-}d_6$ )  $\delta$  10.28 (s, 1H), 8.90 (s, 1H), 8.19-8.14 (m, 3H), 7.92-7.87 (m, 2H), 7.65 (s, 1H), 7.06 (s, 1H);  $^{13}\text{C-NMR}$  (100 MHz,  $\text{DMSO-}d_6$ )  $\delta$  182.24, 181.69, 163.08, 153.43, 134.83, 134.53, 133.64, 133.47,

131.28, 131.08, 127.08, 126.96, 126.12, 119.54, 112.30, 67.07. HRMS (HR-EI)  $m/z$ :  $[M+Na]^+$  calcd for  $C_8H_6BrCl_2NONa$  355.9857; Found 355.9849.

***N*-(2-(1H-indol-3-yl) ethyl)-2,2-dichloroacetamide (1s):** The title compound was synthesized

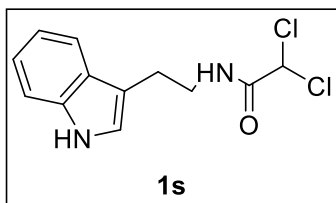

according to the general procedure and obtained as white solid (756.5 mg, 93%); mp. 109-111 °C;  $^1H$ -NMR (400 Hz,  $CDCl_3$ )  $\delta$  8.44 (s, 1H), 7.77 (d,  $J$  = 8.0 Hz, 1H), 7.55 (d,  $J$  = 8.0 Hz, 1H), 7.40 (t,  $J$  = 8.0 Hz, 1H), 7.32 (d,  $J$  = 16.0 Hz, 1H), 7.21-7.20 (m, 1H), 6.86 (s, 1H),

6.04 (s, 1H), 3.81 (dd,  $J$  = 12.0 Hz, 4.0 Hz, 2H), 3.21 (t,  $J$  = 8.0 Hz, 2H);  $^{13}C$ -NMR (100 MHz,  $CDCl_3$ )  $\delta$  164.09, 136.38, 126.99, 122.34, 122.25, 119.52, 118.53, 111.97, 111.37, 66.46, 40.51, 24.76.

HRMS (HR-ESI)  $m/z$ :  $[M+H]^+$  calcd for  $C_{12}H_{13}Cl_2N_2O$  271.0405; Found 271.0398.

**2-morpholino-2-oxo-*N*-phenylacetamide (3a):**<sup>3</sup> The title compound was synthesized

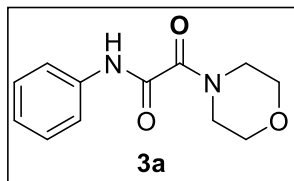

according to the general procedure and obtained as white solid (39.8 mg, 85%);  $^1H$ -NMR (400 Hz,  $CDCl_3$ )  $\delta$  9.49 (s, 1H), 7.58 (d,  $J$  = 8.0 Hz, 2H), 7.30 (t,  $J$  = 8.0 Hz, 2H), 7.11 (t,  $J$  = 8.0 Hz, 1H), 4.17 (t,  $J$  = 4.0 Hz, 2H), 3.71-3.65 (m, 6H);  $^{13}C$ -NMR (100 MHz,  $CDCl_3$ )  $\delta$  160.59, 158.52,

136.80, 128.98, 125.08, 119.98, 67.05, 66.60, 47.17, 43.72.

**2-morpholino-2-oxo-*N*-(p-tolyl)acetamide (3b):**<sup>4</sup> The title compound was synthesized according

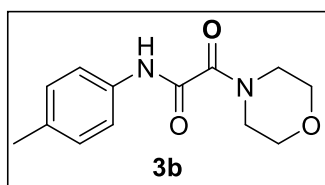

to the general procedure and obtained as white solid (41.7 mg, 84%);

$^1H$ -NMR (400 Hz,  $CDCl_3$ )  $\delta$  9.20 (s, 1H), 7.47 (d,  $J$  = 8.0 Hz, 2H), 7.15 (d,  $J$  = 8.0 Hz, 2H), 4.30 (t,  $J$  = 8.0 Hz, 2H), 3.78-3.71 (m, 6H), 2.33 (s, 3H);  $^{13}C$ -NMR (100 MHz,  $CDCl_3$ )  $\delta$  160.41, 158.19, 135.07, 134.26,

129.75, 119.98, 67.35, 66.90, 47.42, 44.14, 21.06.

***N*-(4-ethylphenyl)-2-morpholino-2-oxoacetamide (3c):** The title compound was synthesized

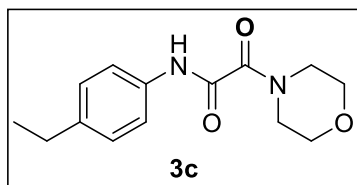

according to the general procedure and obtained as white solid

(45.6 mg, 87%); mp. 112-114 °C;  $^1H$ -NMR (400 Hz,  $CDCl_3$ )  $\delta$  9.19 (s, 1H), 7.50 (d,  $J$  = 4.0 Hz, 2H), 7.19 (d,  $J$  = 4.0 Hz, 2H), 4.32 (t,  $J$  = 4.0 Hz, 2H), 3.79-3.71 (m, 6H), 2.64 (dd,  $J$  = 12.0 Hz, 4.0 Hz, 2H), 1.23

(t,  $J$  = 8.0 Hz, 3H);  $^{13}C$ -NMR (100 MHz,  $CDCl_3$ )  $\delta$  160.40, 158.19, 141.53, 134.42, 128.59, 120.08,

67.36, 66.92, 47.44, 44.16, 29.49, 15.71. HRMS (HR-ESI)  $m/z$ :  $[M+H]^+$  calcd for  $C_{14}H_{19}N_2O_3$  263.1395; Found 263.1389.

***N*-(4-methoxyphenyl)-2-morpholino-2-oxoacetamide (3d):**<sup>4</sup> The title compound was

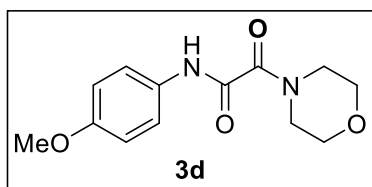

synthesized according to the general procedure and obtained as

white solid (48.1 mg, 91%);  $^1H$ -NMR (400 Hz,  $DMSO-d_6$ )  $\delta$  9.19 (s, 1H), 7.50 (d,  $J$  = 8.0 Hz, 2H), 6.88 (d,  $J$  = 8.0 Hz, 2H), 4.30 (t,  $J$  = 4.0 Hz, 2H), 3.79 (s, 3H), 3.76-3.71 (m, 6H);  $^{13}C$ -NMR (100 MHz,

$CDCl_3$ )  $\delta$  160.80, 158.42, 157.42, 130.27, 121.94, 114.70, 67.66, 67.21, 55.91, 47.73, 44.43.

***N*-(4-fluorophenyl)-2-morpholino-2-oxoacetamide (3e):** The title compound was synthesized

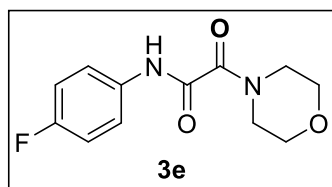

according to the general procedure and obtained as white solid (42.3

mg, 84%); mp. 132-134 °C;  $^1H$ -NMR (400 Hz,  $CDCl_3$ )  $\delta$  9.30 (s, 1H), 7.56 (dq,  $J$  = 8.0 Hz, 4.0 Hz, 2H), 7.07-7.00 (m, 2H), 4.28 (t,  $J$  = 4.0 Hz, 2H), 3.77-3.69 (m, 6H);  $^{13}C$ -NMR (100 MHz,  $CDCl_3$ )  $\delta$  161.0 (d,  $J_{C-F}$  =

243.3 Hz), 160.0, 158.1, 132.7, 121.6, 115.9 (d,  $J_{C-F}$  = 22.4 Hz), 67.1, 66.7, 47.2, 44.0;  $^{19}F$ { $^1H$ } NMR (376MHz,  $CDCl_3$ )  $\delta$  -116.4; HRMS (HR-ESI)  $m/z$ :  $[M^+]$   $C_{12}H_{13}FN_2O_3$  calcd for 252.0910; Found 252.0916.

***N*-(4-chlorophenyl)-2-morpholino-2-oxoacetamide (3f):** The title compound was synthesized

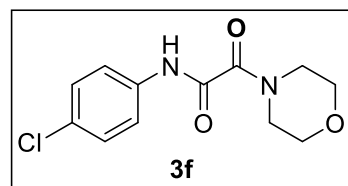

according to the general procedure and obtained as white solid

(41.9 mg, 78%); mp. 136-138 °C;  $^1H$ -NMR (400 Hz,  $CDCl_3$ )  $\delta$  9.29 (s, 1H), 7.55 (td,  $J$  = 8.0 Hz, 4.0 Hz, 2H), 7.32 (td,  $J$  = 8.0 Hz, 4.0 Hz, 2H), 4.31 (t,  $J$  = 8.0 Hz, 2H), 3.77-3.72 (m, 6H);  $^{13}C$ -NMR (100 MHz,

$CDCl_3$ )  $\delta$  160.40, 158.68, 135.84, 130.88, 129.78, 121.63, 67.77, 67.34, 47.88, 44.70. HRMS (HR-EI)  $m/z$ :  $[M^+]$  calcd for  $C_{12}H_{13}ClN_2O_3$  268.0615; Found 268.0611.

***N*-(4-bromophenyl)-2-morpholino-2-oxoacetamide (3g):**<sup>5</sup> The title compound was synthesized

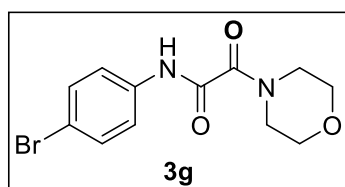

according to the general procedure and obtained as white solid

(49.5 mg, 79%);  $^1H$ -NMR (400 Hz,  $CDCl_3$ )  $\delta$  9.31 (s, 1H), 7.52-7.46

(m, 4H), 4.30 (t,  $J = 4.0$  Hz, 2H), 3.78-3.72 (m, 6H);  $^{13}\text{C}$ -NMR (100 MHz,  $\text{CDCl}_3$ )  $\delta$  160.40, 158.69, 136.34, 132.72, 121.94, 118.53, 67.76, 67.33, 47.87, 44.68.

**2-morpholino-*N*-(4-nitrophenyl)-2-oxoacetamide (3h):**<sup>6</sup> The title compound was synthesized

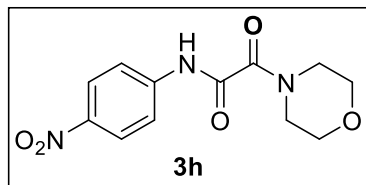

according to the general procedure and obtained as pale yellow solid (19.5 mg, 35%); mp. 201-203 °C;  $^1\text{H}$ -NMR (600 Hz,  $\text{DMSO}-d_6$ )  $\delta$  11.40 (s, 1H), 8.26 (d,  $J = 18.0$  Hz, 2H), 7.91 (d,  $J = 18.0$  Hz, 2H), 3.66 (t,  $J = 6.0$  Hz, 2H), 3.62 (t,  $J = 6.0$  Hz, 2H), 3.58-3.52 (m, 4H);

$^{13}\text{C}$ -NMR (151 MHz,  $\text{CDCl}_3$ )  $\delta$  159.03, 158.22, 144.24, 142.21, 125.08, 119.31, 67.10, 66.70, 47.29, 44.26.

***N*-(2-iodophenyl)-2-morpholino-2-oxoacetamide (3i):** The title compound was synthesized

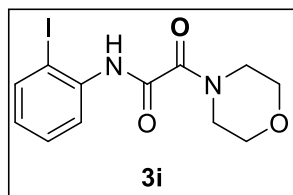

according to the general procedure and obtained as brown solid (28.8 mg, 40%); mp. 125-127 °C;  $^1\text{H}$ -NMR (400 Hz,  $\text{DMSO}-d_6$ )  $\delta$  8.19 (s, 1H), 7.84 (d,  $J = 8.0$  Hz, 1H), 7.40-7.32 (m, 2H), 6.95-6.91 (m, 1H), 3.63 (t,  $J = 8.0$  Hz, 4H), 3.43 (t,  $J = 8.0$  Hz, 4H);  $^{13}\text{C}$ -NMR (100 MHz,  $\text{DMSO}-d_6$ )  $\delta$  155.24,

140.89, 138.59, 128.55, 127.34, 126.82, 98.25, 66.02, 54.88, 44.30. MASS HRMS (ESI)  $m/z$ : [M+H]

<sup>+</sup> calcd for  $\text{C}_{13}\text{H}_{14}\text{F}_3\text{N}_2\text{O}_3$  361.0049; Found 361.0062

**2-morpholino-2-oxo-*N*-(4-(trifluoromethyl)phenyl)acetamide (3j):** The title compound was

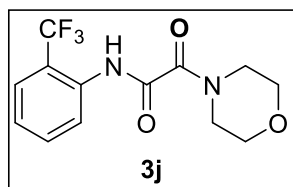

synthesized according to the general procedure and obtained as white solid (28.4mg, 47%); mp. 152-154 °C;  $^1\text{H}$ -NMR (400 Hz,  $\text{DMSO}-d_6$ )  $\delta$  7.58 (s, 1H), 7.47 (t,  $J = 8.0$  Hz, 1H), 7.11 (t,  $J = 8.0$  Hz, 1H), 6.97 (d,  $J = 4.0$  Hz, 1H), 3.62-3.33 (m, 8H);  $^{13}\text{C}$ -NMR (100 MHz,  $\text{DMSO}-d_6$ )  $\delta$  161.4, 153.3,

147.3, 133.4, 126.7 (d,  $J_{\text{C-F}} = 38.9$  Hz), 126.6, 122.8 (d,  $J_{\text{C-F}} = 75.3$  Hz), 122.1 (d,  $J_{\text{C-F}} = 217.9$  Hz), 119.8, 66.3, 66.0, 46.0, 41.3;  $^{19}\text{F}$ {1H} NMR (376MHz,  $\text{CDCl}_3$ )  $\delta$  -59.5; MASS HRMS (ESI)  $m/z$ : [M-H] calcd for  $\text{C}_{13}\text{H}_{12}\text{F}_3\text{N}_2\text{O}_3$  301.0800; Found 301.0500.

***N*-(2,4-dimethoxyphenyl)-2-morpholino-2-oxoacetamide (3k):**<sup>7</sup> The title compound was

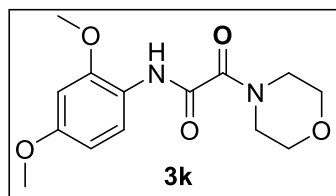

synthesized according to the general procedure and obtained as white solid (51.2mg, 87%); <sup>1</sup>H-NMR (400 Hz, CDCl<sub>3</sub>) δ 9.45 (s, 1H), 8.18 (d, *J* = 4.0 Hz, 1H), 6.47-6.43 (m, 2H), 4.25 (t, *J* = 8.0 Hz, 2H), 3.84 (s, 3H), 3.77 (s, 3H), 3.74-3.69 (m, 6H); <sup>13</sup>C-NMR (100 MHz, CDCl<sub>3</sub>)

δ 160.68, 157.86, 157.42, 150.11, 120.52, 120.15, 103.82, 98.83, 67.36, 66.91, 55.87, 55.65, 47.33, 43.97.

***N*-mesityl-2-morpholino-2-oxoacetamide (3l):** The title compound was synthesized according to

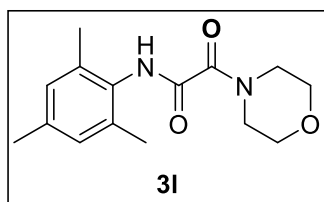

the general procedure and obtained as white solid (17.6 mg, 32%); mp. 166-168 °C; <sup>1</sup>H-NMR (400 Hz, CDCl<sub>3</sub>) δ 8.57 (s, 1H), 6.91 (s, 2H), 4.24 (t, *J* = 8.0 Hz, 2H), 3.80-3.71 (m, 6H), 2.27 (s, 3H), 2.19 (s, 6H); <sup>13</sup>C-NMR (100 MHz, CDCl<sub>3</sub>) δ 160.62, 159.31, 137.60, 134.4, 129.96, 129.15,

67.35, 66.89, 47.31, 43.66, 21.06, 18.44. HRMS (EI) *m/z*: [M+H<sup>+</sup>] calcd for C<sub>15</sub>H<sub>21</sub>N<sub>2</sub>O<sub>3</sub> 277.1552; Found 277.1540.

***N*-(4-chloro-3-nitrophenyl)-2-morpholino-2-oxoacetamide (3m):** The title compound was

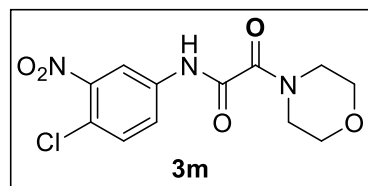

synthesized according to the general procedure and obtained as white solid (18.1 mg, 29%); mp. 184-186 °C; <sup>1</sup>H-NMR (400 Hz, DMSO-*d*<sub>6</sub>) δ 11.36 (s, 1H), 8.45 (d, *J* = 8.0 Hz, 1H), 7.87 (dd, *J* = 8.0 Hz, 4.0 Hz, 1H), 7.77 (d, *J* = 8.0 Hz, 1H), 3.65 (t, *J* = 8.0 Hz, 2H), 3.61

(t, *J* = 8.0 Hz, 2H), 3.56 (t, *J* = 4.0 Hz, 4H); <sup>13</sup>C-NMR (100 MHz, CDCl<sub>3</sub>) δ 158.94, 158.25, 148.10, 136.23, 132.27, 123.78, 122.47, 116.43, 67.12, 66.72, 47.31, 44.30. HRMS (HR-EI) *m/z*: [M<sup>+</sup>] calcd for C<sub>12</sub>H<sub>12</sub>ClN<sub>3</sub>O<sub>5</sub> 313.0465; Found 313.0464.

***N*-benzyl-2-morpholino-2-oxoacetamide (3n):** The title compound was synthesized according to

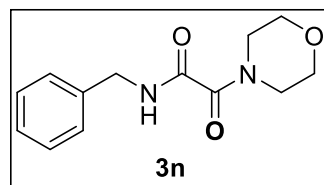

the general procedure and obtained as yellow semi solid (32.7 mg, 66%); <sup>1</sup>H-NMR (600 Hz, DMSO-*d*<sub>6</sub>) δ 9.22 (t, *J* = 18.0 Hz, 1H), 7.36-7.31 (m, 2H), 7.28-7.23 (m, 3H), 4.33 (d, *J* = 6.0 Hz, 2H), 3.61-3.35 (m, 4H), 3.50-3.45 (m, 4H); <sup>13</sup>C-NMR (151 MHz, DMSO-*d*<sub>6</sub>) δ 163.34, 163.11,

138.60, 128.48, 127.38, 127.11, 66.22, 66.87, 46.13, 41.77, 41.39; HRMS (HR-ESI)  $m/z$ :  $[M+Na]^+$  calcd for  $C_{13}H_{16}N_2O_3Na$  271.1059; Found 271.1045.

**2-morpholino-2-oxo-*N*-(quinolin-3-yl)acetamide (3o):** The title compound was synthesized

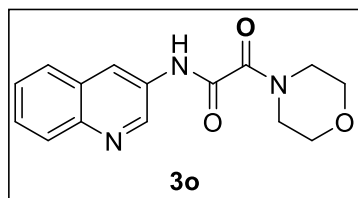

according to the general procedure and obtained as white solid (30.2 mg, 53%); mp. 157-159 °C;  $^1H$ -NMR (400 Hz,  $CDCl_3$ )  $\delta$  9.86 (s, 1H), 8.94 (s, 1H), 8.82 (s, 1H), 8.09 (t,  $J$  = 8.0 Hz, 1H), 7.82 (d,  $J$  = 8.0 Hz, 1H), 7.70-7.65 (m, 1H), 7.57 (t,  $J$  = 8.0 Hz, 1H), 4.30 (t,  $J$  = 4.0

Hz, 2H), 3.80-3.75 (m, 6H);  $^{13}C$ -NMR (100 MHz,  $CDCl_3$ )  $\delta$  159.90, 159.28, 145.19, 143.84, 130.84, 129.37, 128.94, 128.27, 128.13, 127.95, 124.88, 124.88, 67.43, 67.03, 47.59. HRMS (HR-ESI)  $m/z$ :  $[M+H]^+$  calcd for  $C_{15}H_{16}N_3O_3$  286.1191; Found 286.1192.

***N*-(benzo[d]thiazol-2-yl)-2-morpholino-2-oxoacetamide (3p):** The title compound was

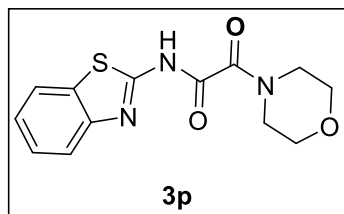

synthesized according to the general procedure and obtained as white solid (22.1 mg, 38%); mp. 171-172 °C;  $^1H$ -NMR (400 Hz,  $CDCl_3$ )  $\delta$  7.86-7.83 (m, 2H), 7.49-7.456 (m, 1H), 7.337-7.33 (m, 1H), 4.32 (t,  $J$  = 4.0 Hz, 2H), 3.80-3.77 (m, 6H);  $^{13}C$ -NMR (100 MHz,  $CDCl_3$ )  $\delta$  158.30, 157.78, 156.17, 148.50, 132.18, 126.49, 124.49, 121.60,

121.40, 67.08, 66.71, 47.10, 44.19. HRMS (HR-ESI)  $m/z$ :  $[M+Na]^+$  calcd for  $C_{13}H_{13}N_3O_3SNa$  314.0576; Found 314.0572.

***N*<sup>1</sup>,*N*<sup>1</sup>-dimethyl-*N*<sup>2</sup>-phenyloxalamide (5a):** The title compound was synthesized according to the

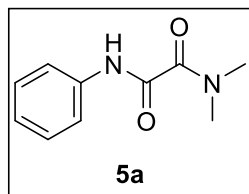

general procedure and obtained as white solid (31.1 mg, 81%); mp. 97-99 °C;  $^1H$ -NMR (400 Hz,  $CDCl_3$ )  $\delta$  9.26 (s, 1H), 7.60 (d,  $J$  = 4.0 Hz, 2H), 7.36 (t,  $J$  = 8.0 Hz, 2H), 7.18-7.14 (m, 1H), 3.51 (s, 3H), 3.09 (s, 3H);  $^{13}C$ -NMR (100 MHz,  $CDCl_3$ )  $\delta$  162.06, 158.96, 137.39, 129.66, 125.57, 120.36, 39.38,

38.41. HRMS (HR-ESI)  $m/z$ :  $[M+Na]^+$  calcd for  $C_{10}H_{12}N_2O_2Na$  215.0797; Found 215.0798.

***N*<sup>1</sup>,*N*<sup>1</sup>-diethyl-*N*<sup>2</sup>-phenyloxalamide (5b):**<sup>5</sup> The title compound was synthesized according to

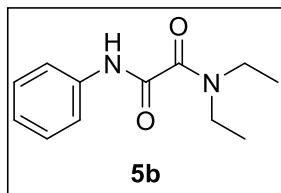

the general procedure and obtained as brown solid (28.6 mg, 65%); <sup>1</sup>H-NMR (400 Hz, CDCl<sub>3</sub>) δ 9.40 (s, 1H), 7.61-7.58 (m, 2H), 7.36-7.31 (m, 2H), 7.15-7.11 (m, 1H), 3.83 (q, *J* = 8.0 Hz, 2H), 3.45 (q, *J* = 8.0 Hz, 2H), 1.31 (t, *J* = 4.0 Hz, 3H), 1.21 (t, *J* = 4.0 Hz, 3H); <sup>13</sup>C-NMR (100 MHz, CDCl<sub>3</sub>) δ 161.30, 158.77, 137.03, 129.04, 124.90, 119.92, 43.70, 42.76, 14.77, 12.44.

**2-oxo-*N*-phenyl-2-(pyrrolidin-1-yl) acetamide (5c):**<sup>3</sup> The title compound was synthesized

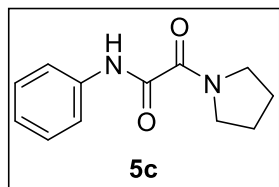

according to the general procedure and obtained as brown solid (24.0 mg, 55%); mp. 137-139 °C; <sup>1</sup>H-NMR (400 Hz, CDCl<sub>3</sub>) δ 9.50 (s, 1H), 7.63-7.61 (m, 2H), 7.35 (t, *J* = 8.0 Hz, 2H), 7.17-7.13 (m, 1H), 4.08 (t, *J* = 8.0 Hz, 2H), 3.61 (t, *J* = 8.0 Hz, 2H), 1.99 (q, *J* = 12.0 Hz, 4.0 Hz, 2H), 1.87 (q, *J* = 12.0 Hz, 4.0 Hz, 2H); <sup>13</sup>C-NMR (100 MHz, CDCl<sub>3</sub>) δ 159.04, 158.13, 136.92, 129.11, 124.92, 119.74, 49.01, 48.38, 26.95, 23.44.

**2-oxo-*N*-phenyl-2-(piperidin-1-yl) acetamide (5d):**<sup>4</sup> The title compound was synthesized

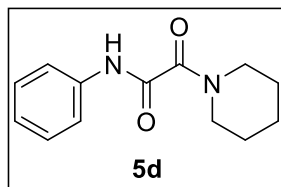

according to the general procedure and obtained as brown solid (34.3mg, 74%); mp. 165-167 °C; <sup>1</sup>H-NMR (400 Hz, CDCl<sub>3</sub>) δ 9.20 (s, 1H), 7.60 (d, *J* = 8.0 Hz, 2H), 7.35 (t, *J* = 8.0 Hz, 2H), 7.17-7.13 (m, 1H), 4.07 (t, *J* = 8.0 Hz, 2H), 3.64 (t, *J* = 4.0 Hz, 2H), 1.69-1.63 (m, 6H); <sup>13</sup>C-NMR (100 MHz, CDCl<sub>3</sub>) δ 160.86, 159.26, 137.13, 129.20, 125.09, 120.00, 47.86, 45.01, 26.97, 25.93, 24.59.

***N*1-methyl-*N*1,*N*2-diphenyloxalamide (5e):** The title compound was synthesized according to

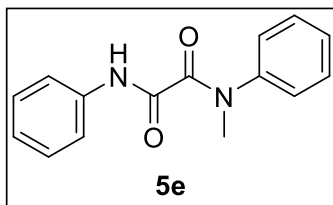

the general procedure and obtained as pale yellow semi solid (40.1mg, 79%); 9.19 (s, 1H), 7.47 (d, *J* = 4.0 Hz, 2H), 7.42-7.39 (m, 2H), 7.36-7.32 (m, 1H), 7.27 (t, *J* = 8.0 Hz, 2H), 7.23-7.21 (m, 2H), 7.10 (t, *J* = 4.0 Hz, 1H), 3.40 (s, 3H); <sup>13</sup>C-NMR (100 MHz, CDCl<sub>3</sub>) δ 164.26, 161.73, 142.06, 137.65, 129.30, 128.83, 127.65, 126.15, 124.16, 119.62, 35.91. HRMS (HR-ESI) *m/z*: [M+Na]<sup>+</sup> calcd for C<sub>15</sub>H<sub>14</sub>N<sub>2</sub>O<sub>2</sub>Na 277.0953; Found 277.0944.

***N*<sup>1</sup>-butyl-*N*<sup>2</sup>-phenyloxalamide (5f):**<sup>8</sup> The title compound was synthesized according to the general procedure and obtained as brown sticky solid (27.3 mg, 62%); <sup>1</sup>H-NMR (400 Hz, DMSO-*d*<sub>6</sub>) δ 8.35 (s, 1H), 7.36 (d, *J* = 8.0 Hz, 2H), 7.19 (t, *J* = 8.0 Hz, 2H), 6.88-6.84 (m, 1H), 6.08 (t, *J* = 4.0 Hz, 1H), 3.06 (dd, *J* = 12.0 Hz, 4.0 Hz, 2H), 1.42 – 1.38 (m, 2H), 1.33-1.29 (m, 2H), 0.89 (t, *J* = 4.0 Hz, 3H); <sup>13</sup>C-NMR (100 MHz, CDCl<sub>3</sub>) δ 156.67, 152.18, 138.57, 129.38, 124.01, 121.39, 40.29, 32.25, 20.17, 13.90.

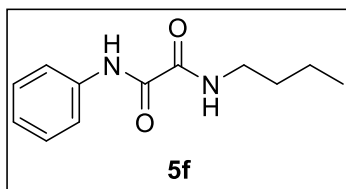

***N*<sup>1</sup>-(tert-butyl)-*N*<sup>2</sup>-phenyloxalamide (5g):**<sup>9</sup> The title compound was synthesized according to the general procedure and obtained as white semi solid (34.4mg, 78%); <sup>1</sup>H-NMR (400 Hz, DMSO-*d*<sub>6</sub>) δ 8.20 (s, 1H), 7.33 (dd, *J* = 12.0 Hz, 4.0 Hz, 2H), 7.19 (t, *J* = 8.0 Hz, 2H), 6.88-6.84 (m, 1H), 1.28 (s, 9H); <sup>13</sup>C-NMR (100 MHz, CDCl<sub>3</sub>) δ 157.10, 155.82, 139.95, 129.62, 123.41, 120.68, 51.41, 30.30.

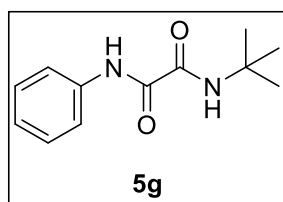

***N*<sup>1</sup>-phenethyl-*N*<sup>2</sup>-phenyloxalamide (5h):** The title compound was synthesized according to the general procedure and obtained as white gum solid (32.7mg, 61%); <sup>1</sup>H-NMR (400 Hz, CDCl<sub>3</sub>) δ 7.38-7.06 (m, 12H), 3.49 (t, *J* = 8.0 Hz, 2H), 2.82 (t, *J* = 8.0 Hz, 2H); <sup>13</sup>C-NMR (100 MHz, CDCl<sub>3</sub>) δ 159.27, 156.40, 139.21, 138.32, 129.66, 129.14, 128.96, 126.82, 124.62, 122.00, 41.87, 36.40. HRMS (ESI) *m/z*: [M+H]<sup>+</sup> calcd for C<sub>16</sub>H<sub>17</sub>N<sub>2</sub>O<sub>2</sub> 261.1290; Found 261.1284.

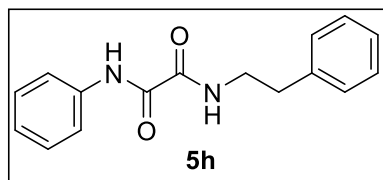

***N*<sup>1</sup>-phenyl-*N*<sup>2</sup>-(*p*-tolyl)oxalamide (5i):** The title compound was synthesized according to the general procedure and obtained as brown sticky solid (33.1 mg, 65%); <sup>1</sup>H-NMR (400 Hz, CDCl<sub>3</sub>) δ 8.65 (dd, *J* = 32.0 Hz, 12.0 Hz, 1H), 8.37 (d, *J* = 4.0 Hz, 1H), 7.54 (d, *J* = 4.0 Hz, 1H), 7.43-7.39 (m, 1H), 7.36 (dd, *J* = 8.0 Hz, 4.0 Hz, 1H), 7.23-7.20 (m, 1H), 7.18-7.07 (m, 4H), 6.98 (d, *J* = 12.0 Hz, 1H), 2.33 (m, 3H); <sup>13</sup>C-NMR (100 MHz, CDCl<sub>3</sub>) δ 162.44, 159.00, 130.41, 129.99, 129.94, 129.75, 129.28, 125.54, 125.01, 121.87, 120.15, 120.08,

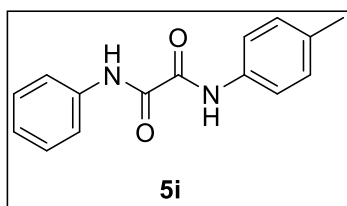

119.45, 119.08, 20.95. HRMS (ESI)  $m/z$ :  $[M+Na]^+$  calcd for  $C_{15}H_{14}N_2O_2Na$  277.0953; Found 277.0964.

***N*<sup>1</sup>,*N*<sup>2</sup>-di-*p*-tolylloxalamide (5j):** <sup>10</sup> The title compound was synthesized according to the general

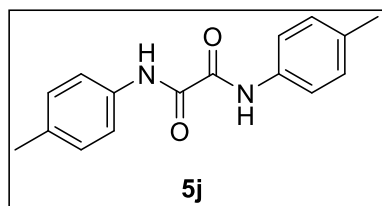

procedure and obtained as brown sticky solid (32.7mg, 61%); mp. 255-257 °C; <sup>1</sup>H-NMR (400 Hz, DMSO-*d*<sub>6</sub>) δ 8.52 (s, 2H), 7.32 (d, *J* = 8.0 Hz, 4H), 7.07 (d, *J* = 8.0 Hz, 4H), 2.24 (s, 6H); <sup>13</sup>C-NMR (100 MHz, DMSO-*d*<sub>6</sub>) δ 153.02, 137.63, 130.85, 129.51, 118.59,

118.58, 20.70.

***N*<sup>1</sup>,*N*<sup>1</sup>-dimethyl-*N*<sup>2</sup>-phenylloxalamide (5a):** The title compound was synthesized according to the

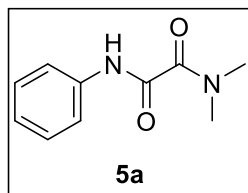

general procedure and obtained as white solid (33.8mg, 88%); mp. 93-95 °C;

<sup>1</sup>H-NMR (600 Hz, CDCl<sub>3</sub>) δ 9.26 (s, 1H), 7.61-7.59 (m, 2H), 7.35 (t, *J* = 12.0 Hz, 2H), 7.17-7.14 (m, 1H), 3.51 (s, 3H), 3.09 (s, 3H); <sup>13</sup>C-NMR (151 MHz, CDCl<sub>3</sub>) δ 161.67, 158.56, 137.00, 129.24, 125.15, 119.97, 38.97, 38.00.

HRMS (HR-ESI)  $m/z$ :  $[M+Na]^+$  calcd for  $C_{10}H_{12}N_2O_2Na$  215.0797; Found

215.0798.

***N*<sup>1</sup>,*N*<sup>1</sup>-dimethyl-*N*<sup>2</sup>-(*p*-tolyl)oxalamide (5k):** <sup>11</sup> The title compound was synthesized according to

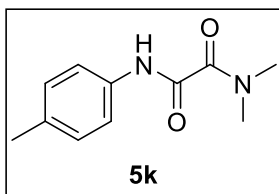

the general procedure and obtained as pale yellow solid (32.68 mg, 79%); <sup>1</sup>H-NMR (600 Hz, CDCl<sub>3</sub>) δ 9.18 (s, 1H), 7.53-7.50 (m, 2H), 6.90-6.88 (m, 2H), 3.80(s, 3H), 3.51 (s, 3H), 3.08 (s, 3H); <sup>13</sup>C-NMR (151 MHz, CDCl<sub>3</sub>) δ 161.87, 158.52, 134.80, 134.47, 129.69, 119.96, 38.90, 37.86,

21.04.

***N*<sup>1</sup>-(4-methoxyphenyl)-*N*<sup>2</sup>,*N*<sup>2</sup>-dimethyloxalamide (5l):** The title compound was synthesized

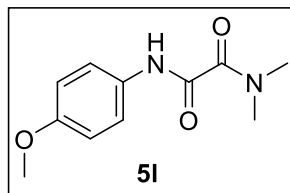

according to the general procedure and obtained as pale yellow solid (32.0 mg, 72%); mp. 113-115 °C; <sup>1</sup>H-NMR (600 Hz, CDCl<sub>3</sub>) δ 9.18 (s, 1H), 7.53-7.50 (m, 2H), 6.90-6.88 (m, 2H), 3.80 (s, 3H), 3.51 (s, 3H), 3.08 (s, 3H); <sup>13</sup>C-NMR (151 MHz, CDCl<sub>3</sub>) δ 162.07, 158.59, 157.22, 130.40,

121.79, 114.61, 55.84, 39.15, 38.14. HRMS (HR-ESI)  $m/z$ :  $[M+Na]^+$  calcd for  $C_{11}H_{14}N_2O_3Na$  245.0902; Found 245.0902.

***N*<sup>1</sup>-(4-chlorophenyl)-*N*<sup>2</sup>,*N*<sup>2</sup>-dimethyloxalamide (5m):** The title compound was synthesized

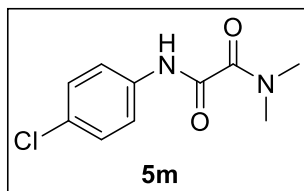

according to the general procedure and obtained as pale yellow solid (18.6 mg, 41%); mp. 131-133 °C; <sup>1</sup>H-NMR (600 Hz, CDCl<sub>3</sub>) δ 9.33 (s, 1H), 7.57-7.55 (m, 2H), 7.33-7.30 (m, 2H), 3.51 (s, 3H), 3.09 (s, 3H); <sup>13</sup>C-NMR (151 MHz, CDCl<sub>3</sub>) δ 161.56, 158.71, 135.82, 130.42, 129.51,

121.37, 39.18, 38.29. HRMS (HR-ESI)  $m/z$ :  $[M+Na]^+$  calcd for  $C_{10}H_{11}ClN_2O_2Na$  249.0407; Found 249.0407.

***N*<sup>1</sup>-(4-bromophenyl)-*N*<sup>2</sup>,*N*<sup>2</sup>-dimethyloxalamide (5n):**<sup>5</sup> The title compound was synthesized

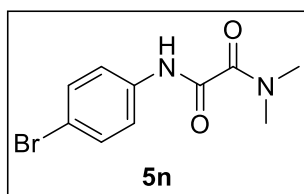

according to the general procedure and obtained as pale yellow solid (32.5 mg, 60%); <sup>1</sup>H-NMR (600 Hz, CDCl<sub>3</sub>) δ 9.31 (s, 1H), 7.52-7.45 (m, 4H), 3.51 (s, 3H), 3.09 (s, 3H); <sup>13</sup>C-NMR (151 MHz, CDCl<sub>3</sub>) δ 161.51, 158.68, 136.31, 132.47, 121.67, 118.08, 39.19, 38.33.

***N*<sup>1</sup>-phenyloxalamide (5o):**<sup>3</sup> The title compound was synthesized according to the general

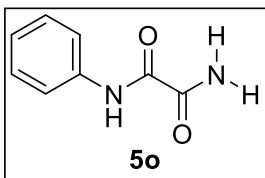

procedure and obtained as white solid (21.0 mg, 64%); mp. 102-104 °C; <sup>1</sup>H-NMR (400 Hz, DMSO-*d*<sub>6</sub>) δ 10.56 (s, 1H), 8.30 (bs, 1H), 7.98 (bs, 1H), 7.81 (d, *J* = 9.24 Hz), 7.34 (t, *J* = 8.24), 7.12 (t, *J* = 7.4 Hz); <sup>13</sup>C-NMR (100 MHz, DMSO-*d*<sub>6</sub>) δ 162.7, 159.4, 138.2, 129.2, 124.9, 120.7.

***N*<sup>1</sup>,*N*<sup>1</sup>-diethyl-*N*<sup>2</sup>-(*p*-tolyl)oxalamide (5p):**<sup>5</sup> The title compound was synthesized according to

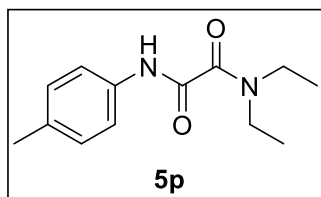

the general procedure and obtained as brown semi-solid (33.3 mg, 71%); <sup>1</sup>H-NMR (400 Hz, CDCl<sub>3</sub>) δ 10.57 (s, 1H), 7.53 (d, *J* = 8.0 Hz, 2H), 7.14 (d, *J* = 8.0 Hz, 2H), 2.26 (s, 3H), 1.34-1.22 (m, 3H), 1.17-1.10 (m, 7H); <sup>13</sup>C-NMR (100 MHz, CDCl<sub>3</sub>) δ 161.70, 158.99, 135.19, 134.99,

130.15, 120.39, 44.31, 43.51, 21.51, 15.39, 13.03.

**2-bromo-2,2-dichloro-*N*-phenylacetamide (6a):** The title compound was synthesized according to the general procedure and obtained as white solid (49.8 mg, 88%); mp. 102-104 °C; <sup>1</sup>H-NMR (400 Hz, DMSO-*d*<sub>6</sub>) δ 10.74 (s, 1H), 7.67-7.64 (m, 2H), 7.41 (t, *J* = 8.0 Hz, 2H), 7.43-7.19 (m, 1H); <sup>13</sup>C-NMR (100 MHz, CDCl<sub>3</sub>) δ 160.14, 136.59, 129.92, 126.61, 120.89, 75.83. HRMS (HR-EI) *m/z*: [M<sup>+</sup>] calcd for C<sub>8</sub>H<sub>6</sub>BrCl<sub>2</sub>NO 280.9010; Found 280.9005.

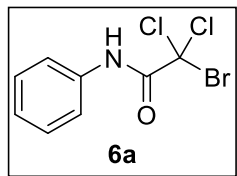

**2-bromo-2,2-dichloro-*N*-(*p*-tolyl) acetamide (6b):** The title compound was synthesized according to the general procedure and obtained as brown solid (41.5 mg, 70%); mp. 115-117 °C; <sup>1</sup>H-NMR (400 Hz, CDCl<sub>3</sub>) δ 8.31 (s, 1H), 7.45 (d, *J* = 8.0 Hz, 2H), 7.20 (d, *J* = 8.0 Hz, 2H), 2.36 (s, 1H); <sup>13</sup>C-NMR (100 MHz, CDCl<sub>3</sub>) δ 159.32, 135.70, 133.22, 129.64, 120.14, 75.15, 20.78. HRMS (HR-EI) *m/z*: [M<sup>+</sup>] calcd C<sub>9</sub>H<sub>8</sub>BrCl<sub>2</sub>NO for 294.9166; Found 294.9160.

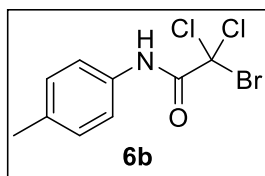

**2-bromo-2,2-dichloro-*N*-(4-ethylphenyl)acetamide (6c):** The title compound was synthesized according to the general procedure and obtained as brown solid (32.9 mg, 53%); mp. 119-121 °C; <sup>1</sup>H-NMR (400 Hz, CDCl<sub>3</sub>) δ 8.32 (s, 1H), 7.48 (d, *J* = 8.0 Hz, 2H), 7.23 (d, *J* = 8.0 Hz, 2H), 2.65 (q, *J* = 16.0 Hz, 8.0 Hz, 2H), 1.24 (t, *J* = 8.0 Hz, 3H); <sup>13</sup>C-NMR (100 MHz, CDCl<sub>3</sub>) δ 159.65, 142.42, 133.72, 128.80, 120.54, 75.49, 28.51, 15.71. HRMS (HR-EI) *m/z*: [M<sup>+</sup>] calcd for C<sub>10</sub>H<sub>10</sub>BrCl<sub>2</sub>NO 308.9323; Found 308.9319.

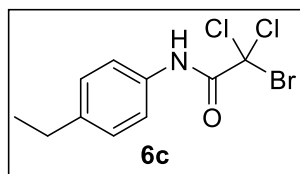

**2-bromo-2,2-dichloro-*N*-(4-methoxyphenyl)acetamide (6d):** The title compound was synthesized according to the general procedure and obtained as white solid (41.9 mg, 67%); mp. 109-111 °C; <sup>1</sup>H-NMR (600 Hz, DMSO-*d*<sub>6</sub>) δ 7.54 (d, *J* = 12.0 Hz, 2H), 6.96 (d, *J* = 12.0 Hz, 2H), 3.76 (s, 3H); <sup>13</sup>C-NMR (151 MHz, CDCl<sub>3</sub>) δ 159.76, 157.81, 129.08, 122.29, 114.61, 55.69. HRMS (HR-EI) *m/z*: [M<sup>+</sup>] calcd C<sub>9</sub>H<sub>8</sub>BrCl<sub>2</sub>NO<sub>2</sub> for 310.9115; Found 310.9124.

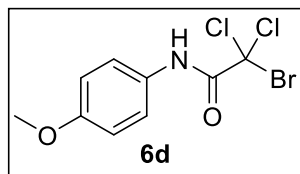

**2-bromo-2,2-dichloro-*N*-(4-fluorophenyl) acetamide (6e):** The title compound was synthesized

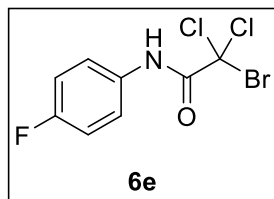

according to the general procedure and obtained as brown solid (36.7mg, 61%); mp. 102-104 °C;  $^1\text{H-NMR}$  (400 Hz,  $\text{CDCl}_3$ )  $\delta$  8.41 (s, 1H), 7.54 (dq,  $J$  = 8.0 Hz, 4.0 Hz, 2H), 7.08 (t,  $J$  = 8.0 Hz, 2H);  $^{13}\text{C-NMR}$  (100 MHz,  $\text{CDCl}_3$ )  $\delta$  161.7 (d,  $J_{\text{C-F}}$  = 175.8 Hz), 159.2, 132.1, 122.6 (d,  $J_{\text{C-F}}$  = 8.2 Hz), 116.3 (d,  $J_{\text{C-F}}$  = 22.7 Hz), 75.1;  $^{19}\text{F}\{^1\text{H}\}$  NMR (376MHz,  $\text{CDCl}_3$ )  $\delta$  -115.2; HRMS (HR-EI)  $m/z$ : [ $\text{M}^+$ ]  $\text{C}_8\text{H}_5\text{BrCl}_2\text{FNO}$  calcd for 298.8916; Found 298.8910.

**2-bromo-2,2-dichloro-*N*-(4-chlorophenyl)acetamide (6f):** The title compound was synthesized

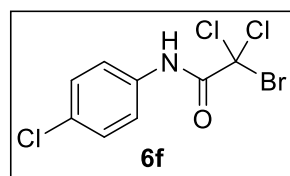

according to the general procedure and obtained as white solid (43.1 mg, 68%); mp. 134-136 °C;  $^1\text{H-NMR}$  (400 Hz,  $\text{DMSO-}d_6$ )  $\delta$  10.86 (s, 1H), 7.69 (d,  $J$  = 8.0 Hz, 2H), 7.46 (d,  $J$  = 8.0 Hz, 2H);  $^{13}\text{C-NMR}$  (100 MHz,  $\text{CDCl}_3$ )  $\delta$  159.59, 134.49, 131.27, 129.37, 121.60, 74.88. HRMS (HR-EI)  $m/z$ : [ $\text{M}^+$ ]  $\text{C}_8\text{H}_5\text{BrCl}_3\text{NO}$  calcd for 314.8620; Found 314.8620.

**2-bromo-*N*-(4-bromophenyl)-2,2-dichloroacetamide (6g):** The title compound was synthesized

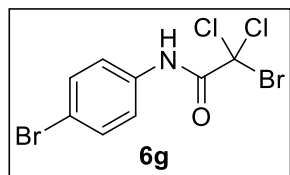

according to the general procedure and obtained as white solid (70.9 mg, 98%); mp. 131-133 °C;  $^1\text{H-NMR}$  (400 Hz,  $\text{DMSO-}d_6$ )  $\delta$  10.85 (s, 1H), 7.65-7.57 (m, 4H);  $^{13}\text{C-NMR}$  (100 MHz,  $\text{DMSO-}d_6$ )  $\delta$  160.91, 137.11, 132.08, 123.72, 117.68, 75.31. HRMS (HR-EI)  $m/z$ : [ $\text{M}^+$ ] calcd  $\text{C}_8\text{H}_5\text{Br}_2\text{Cl}_2\text{NO}$  for 358.8115; Found 358.8107.

**2-bromo-2,2-dichloro-*N*-(4-nitrophenyl)acetamide (6h):** The title compound was synthesized

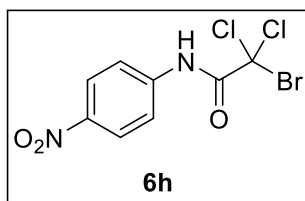

according to the general procedure and obtained as yellow solid (45.2 mg, 69%); mp. 136-138 °C;  $^1\text{H-NMR}$  (400 Hz,  $\text{CDCl}_3$ )  $\delta$  8.64 (s, 1H), 8.32-8.28 (m, 2H), 7.83-7.79 (m, 2H);  $^{13}\text{C-NMR}$  (100 MHz,  $\text{CDCl}_3$ )  $\delta$  159.98, 145.17, 141.84, 125.43, 120.30, 74.61. HRMS (HR-EI)  $m/z$ : [ $\text{M}^+$ ]  $\text{C}_8\text{H}_5\text{BrCl}_2\text{N}_2\text{O}_3$  calcd for 325.8861; Found 325.8862.

**2-bromo-2,2-dichloro-*N*-(2-(trifluoromethyl)phenyl)acetamide (6i):** The title compound was

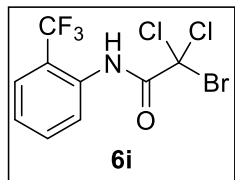

synthesized according to the general procedure and obtained as yellow liquid (60.3 mg, 86%);  $^1\text{H-NMR}$  (400 Hz,  $\text{CDCl}_3$ )  $\delta$  8.81 (s, 1H), 8.17 (d,  $J = 8.0$  Hz, 1H), 7.70-7.63 (m, 2H), 7.36-7.34 (m, 1H);  $^{13}\text{C-NMR}$  (100 MHz,  $\text{CDCl}_3$ )  $\delta$  160.0, 133.2 (d,  $J_{\text{C-F}} = 33.0$  Hz), 126.3 (q,  $J_{\text{C-F}} = 41.2$  Hz), 126.0, 125.1, 124.0, 122.4 (d,  $J_{\text{C-F}} = 166.9$  Hz), 121.1, 74.7;  $^{19}\text{F}\{^1\text{H}\}$  NMR (376 MHz,  $\text{CDCl}_3$ )  $\delta$  -60.5; HRMS (HR-EI)  $m/z$ :  $[\text{M}^+]$  calcd  $\text{C}_9\text{H}_5\text{BrCl}_2\text{F}_3\text{NO}$  for 348.8884; Found 348.8838.

**2-bromo-2,2-dichloro-*N*-(3-(trifluoromethyl)phenyl)acetamide (6j):** The title compound was

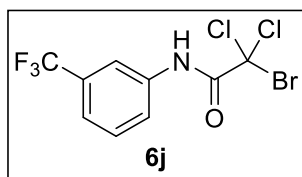

synthesized according to the general procedure and obtained as white solid (66.6 mg, 95%); mp. 138-140 °C;  $^1\text{H-NMR}$  (400 Hz,  $\text{CDCl}_3$ )  $\delta$  8.47 (s, 1H), 7.70 (dd,  $J = 24.0$  Hz, 18.0 Hz, 4H);  $^{13}\text{C-NMR}$  (100 MHz,  $\text{CDCl}_3$ )  $\delta$  159.7, 139.0, 128.0, 127.7, 126.6 (q,  $J_{\text{C-F}} = 75.7$  Hz), 125.1 (d,  $J_{\text{C-F}} = 138.7$  Hz), 122.4 (d,  $J_{\text{C-F}} = 229.0$  Hz), 74.7;  $^{19}\text{F}\{^1\text{H}\}$  NMR (376 MHz,  $\text{CDCl}_3$ )  $\delta$  -62.3; HRMS (HR-EI)  $m/z$ :  $[\text{M}^+]$  calcd  $\text{C}_9\text{H}_5\text{BrCl}_2\text{F}_3\text{NO}$  for 348.8884; Found 348.8885.

**2-bromo-2,2-dichloro-*N*-(2,4-dimethoxyphenyl)acetamide (6k):** The title compound was

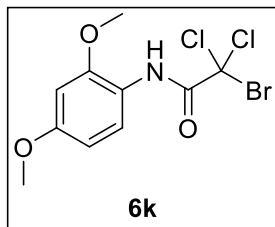

synthesized according to the general procedure and obtained as black semi solid (21.9 mg, 32%);  $^1\text{H-NMR}$  (600 Hz,  $\text{DMSO-}d_6$ )  $\delta$  9.81 (s, 1H), 7.33 (d,  $J = 12.0$  Hz, 1H), 6.67 (d,  $J = 6.0$  Hz, 1H), 6.56 (dd,  $J = 12.0$  Hz, 4.0 Hz), 3.81 (s, 3H), 3.78 (s, 3H);  $^{13}\text{C-NMR}$  (151 MHz,  $\text{DMSO-}d_6$ )  $\delta$  160.63, 158.92, 153.87, 126.03, 117.88, 104.48, 99.13, 74.91, 95.94, 95.37. HRMS (HR-EI)  $m/z$ :  $[\text{M}^+]$  calcd  $\text{C}_{10}\text{H}_{10}\text{BrCl}_2\text{NO}_3$  for 340.9221; Found 340.9229.

**2-bromo-2,2-dichloro-*N*-mesitylacetamide (6l):** The title compound was synthesized according

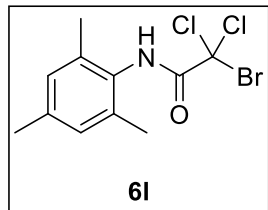

to the general procedure and obtained as yellow solid (50.0 mg, 77%); mp. 142-144 °C;  $^1\text{H-NMR}$  (400 Hz,  $\text{CDCl}_3$ )  $\delta$  7.90 (s, 1H), 6.92 (s, 2H), 2.29 (s, 3H), 2.23 (s, 6H);  $^{13}\text{C-NMR}$  (100 MHz,  $\text{CDCl}_3$ )  $\delta$  160.74, 138.41, 135.55, 129.52, 75.73, 21.28, 18.20. HRMS (HR-EI)  $m/z$ :  $[\text{M}^+]$  calcd  $\text{C}_{11}\text{H}_{12}\text{BrCl}_2\text{NO}$  for 322.9479; Found 322.9470.

**2-bromo-2,2-dichloro-*N*-(4-chloro-3-nitrophenyl)acetamide (6m):** The title compound was

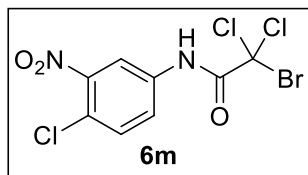

synthesized according to the general procedure and obtained as white solid (59.4 mg, 82%); mp. 105-107 °C;  $^1\text{H-NMR}$  (400 Hz,  $\text{CDCl}_3$ )  $\delta$  8.59 (s, 1H), 8.23 (d,  $J$  = 4.0 Hz, 1H), 7.79 (dd,  $J$  = 8.0 Hz, 4.0 Hz, 1H), 7.59 (d,  $J$  = 4.0 Hz, 1H);  $^{13}\text{C-NMR}$  (100 MHz,  $\text{CDCl}_3$ )  $\delta$  159.94, 135.51, 132.57,

124.54, 123.62, 117.23, 74.05. HRMS (HR-EI)  $m/z$ :  $[\text{M}^+]$   $\text{C}_8\text{H}_4\text{BrCl}_3\text{N}_2\text{O}_3$  calcd for 359.8471; Found 359.8471.

***N*-benzyl-2-bromo-2,2-dichloroacetamide (6n):** The title compound was synthesized according

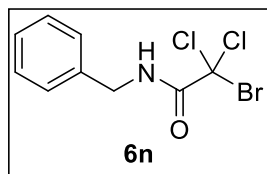

to the general procedure and obtained as white solid (42.2 mg, 71%); mp. 104-106 °C;  $^1\text{H-NMR}$  (400 Hz,  $\text{DMSO-}d_6$ )  $\delta$  9.53 (s, 1H), 7.36-7.24 (m, 5H), 4.38 (d,  $J$  = 8.0 Hz, 2H);  $^{13}\text{C-NMR}$  (100 MHz,  $\text{CDCl}_3$ )  $\delta$  162.41, 136.48, 129.14, 128.31, 127.91, 75.16, 45.60. HRMS (EI)  $m/z$ :  $[\text{M}^+]$   $\text{C}_9\text{H}_8\text{BrCl}_2\text{NO}$

calcd for 294.9166; Found 294.9166.

***N*-(2-(1H-indol-3-yl)ethyl)-2-bromo-2,2-dichloroacetamide (6o):** The title compound was

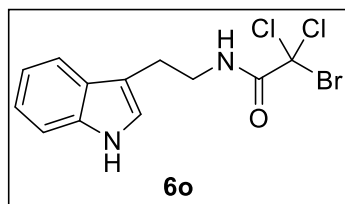

synthesized according to the general procedure and obtained as light brown semi solid (22.40 mg, 32%);  $^1\text{H-NMR}$  (400 Hz,  $\text{DMSO-}d_6$ )  $\delta$  10.83 (s, 1H), 9.06 (t,  $J$  = 8.0 Hz, 1H), 7.58 (d,  $J$  = 8.0 Hz, 1H), 7.34 (t,  $J$  = 8.0 Hz, 1H), 7.17 (s, 1H), 7.07 (t,  $J$  = 8.0 Hz, 1H), 6.99 (t,  $J$  = 8.0

Hz, 1H), 3.50-3.43 (m, 2H), 2.92 (t,  $J$  = 8.0 Hz, 2H);  $^{13}\text{C-NMR}$  (100 MHz,  $\text{CDCl}_3$ )  $\delta$  162.68, 136.91, 127.46, 122.92, 122.77, 120.19, 119.08, 112.50, 111.81, 75.73, 42.14, 25.12. HRMS (HR-EI)  $m/z$ :  $[\text{M}^+]$   $\text{C}_{12}\text{H}_{11}\text{BrCl}_2\text{N}_2\text{O}$  calcd for 347.9432; Found 347.9440.

***N*-(1-benzylpyrrolidin-3-yl)-2-bromo-2,2-dichloroacetamide (6p):** The title compound was

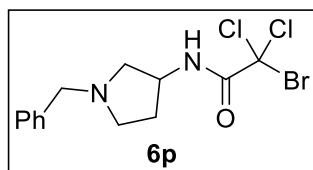

synthesized according to the general procedure and obtained as brown solid (56.3 mg, 77%); mp. 168-170 °C;  $^1\text{H-NMR}$  (400 Hz,  $\text{CDCl}_3$ )  $\delta$  9.09 (s, 1H), 7.57 (s, 2H), 7.44-7.38 (m, 3H), 4.92 (s, 1H), 4.35-4.28

(m, 2H), 3.78 (s, 1H), 3.65-3.62 (m, 1H), 3.27 (s, 1H), 3.00 (s, 1H), 2.63-2.61 (m, 1H), 2.38-2.36 (m, 1H);  $^{13}\text{C-NMR}$  (100 MHz,  $\text{CDCl}_3$ )  $\delta$  163.02, 130.61, 129.71, 128.90, 128.53, 74.47, 58.15, 52.55,

48.83, 34.42, 31.74. HRMS (HR-ESI)  $m/z$ :  $[M+H]^+$  calcd for  $C_{13}H_{16}BrCl_2N_2$  364.9823; Found 364.9812.

**2-bromo-2,2-dichloro-N-(quinolin-3-yl) acetamide (6q):** The title compound was synthesized

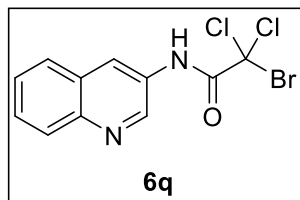

according to the general procedure and obtained as pale-yellow solid (41.4 mg, 62%); mp. 109-111 °C;  $^1H$ -NMR (400 Hz,  $DMSO-d_6$ )  $\delta$  11.25 (s, 1H), 9.09 (d,  $J = 4.0$  Hz, 1H), 8.67 (d,  $J = 4.0$  Hz, 1H), 8.02 (d,  $J = 8.0$  Hz, 2H), 7.76-7.72 (m, 1H), 7.65-7.61 (m, 1H);  $^{13}C$ -NMR (100 MHz,  $DMSO-d_6$ )  $\delta$  161.16, 145.64, 145.00, 131.06, 128.95, 128.57, 128.06, 127.34, 127.28, 125.72, 74.54;

HRMS (EI)  $m/z$ :  $[M^+]$   $C_{12}H_{13}FN_2O_3$  calcd for 252.0910; Found 252.0916.

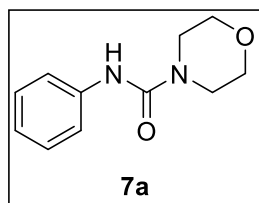

**N-phenylmorpholine-4-carboxamide (7a):** <sup>12</sup> The title compound was synthesized according to the general procedure and obtained as white solid (25.5 mg, 62%);  $^1H$ -NMR (400 Hz,  $DMSO-d_6$ )  $\delta$  8.50 (s, 1H), 7.46-7.44 (m, 2H), 7.25-7.21 (m, 2H), 6.96-6.91 (m, 1H), 3.61 (t,  $J = 8.0$  Hz, 4H), 3.42

(t,  $J = 4.0$  Hz, 4 Hz);  $^{13}C$ -NMR (100 MHz,  $DMSO-d_6$ )  $\delta$  155.17, 140.35, 128.28, 121.80, 119.64, 119.63, 119.62, 119.60, 119.59, 66.99, 44.16.

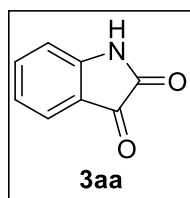

**indoline-2,3-dione (3aa):** <sup>2</sup> The title compound was synthesized according to the general procedure and obtained as orange solid (18.2 mg, 62%);  $^1H$ -NMR (400 Hz,  $DMSO-d_6$ )  $\delta$  11.03 (s, 1H), 7.58 (t,  $J = 8.0$  Hz, 1H), 7.49 (d,  $J = 4.0$  Hz, 1H), 7.06 (t,  $J = 8.0$  Hz, 1H), 6.90 (d,  $J = 4.0$  Hz, 1H);  $^{13}C$ -NMR (100 MHz,  $DMSO-d_6$ )

$\delta$  184.38, 159.36, 150.71, 138.37, 124.69, 122.76, 117.82, 112.20.

## 17. References:

- (1) D. M. Heard and A. Lennox, *J. Org. Lett.* 2021, **23**, 3368-3372.
- (2) Y. Zi, Z.-J. Cai, S.-Y. Wang and S.-J. Ji, *Org. Lett.* 2014, **16**, 3094-3097.
- (3) A. Nagaki, Y. Takahashi and J. i. Yoshida, *Angew. Chem., Int. Ed. Engl.* 2016, **55**, 5347-5347.
- (4) Z. Zhan, X. Cheng, X. Ma, J. Li, L. Hai and Y. Wu, *Tetrahedron Lett.* 2015, **71**, 6928-6934.
- (5) X. Zhuang, L. Ling, Y. Wang, B. Li, B. Sun, W. Su and C. Jin, *Org. Lett.* 2022, **24**, 1668-1672.
- (6) H. Gross and G. Zinner, *Aminen. Chem. Ber.* 1973, **106**, 2315-2323.
- (7) J. J. Mason, T. Janosik and J. Bergman, *Synthesis*. 2009, 3642-3648.
- (8) N. Kambe, T. Inoue, T. Takeda, S.-i. Fujiwara and N. Sonoda, *J. Am. Chem. Soc.* 2006, **128**, 12650-12651.
- (9) C. Zhang, Y. Zhao, B. Li, H. Song, S. Xu and B. Wang, *Dalton Trans.* 2009, **26**, 5182-5189.
- (10) B. Zhu, W. Xiong, X. Tan, W. Wu and H. Jiang, *Tetrahedron Lett.* 2022, **109**, 154140.
- (11) P. Wu, W. Huang, T.-J. Cheng, H.-X. Lin, H. Xu and H.-X. Dai, *Org. Lett.* 2020, **22**, 5051-5056.
- (12) S.-Y. Moon, U. B. Kim, D.-B. Sung and W.-S. Kim, *J. Org. Chem.* 2015, **80**, 1856-1865.

# Proton and Carbon Spectrum

**$^1\text{H}$  NMR spectrum**  
**Solvent:  $\text{CDCl}_3$**   
**Spectrometer Frequency: 400 MHz**

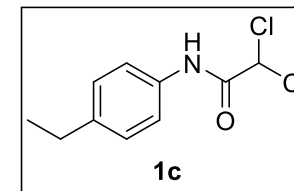

8.1470  
7.4691 7.4479  
7.2122 7.1910  
6.0442

2.6696 2.6506  
2.6316 2.6126

1.2479 1.2289  
1.2099

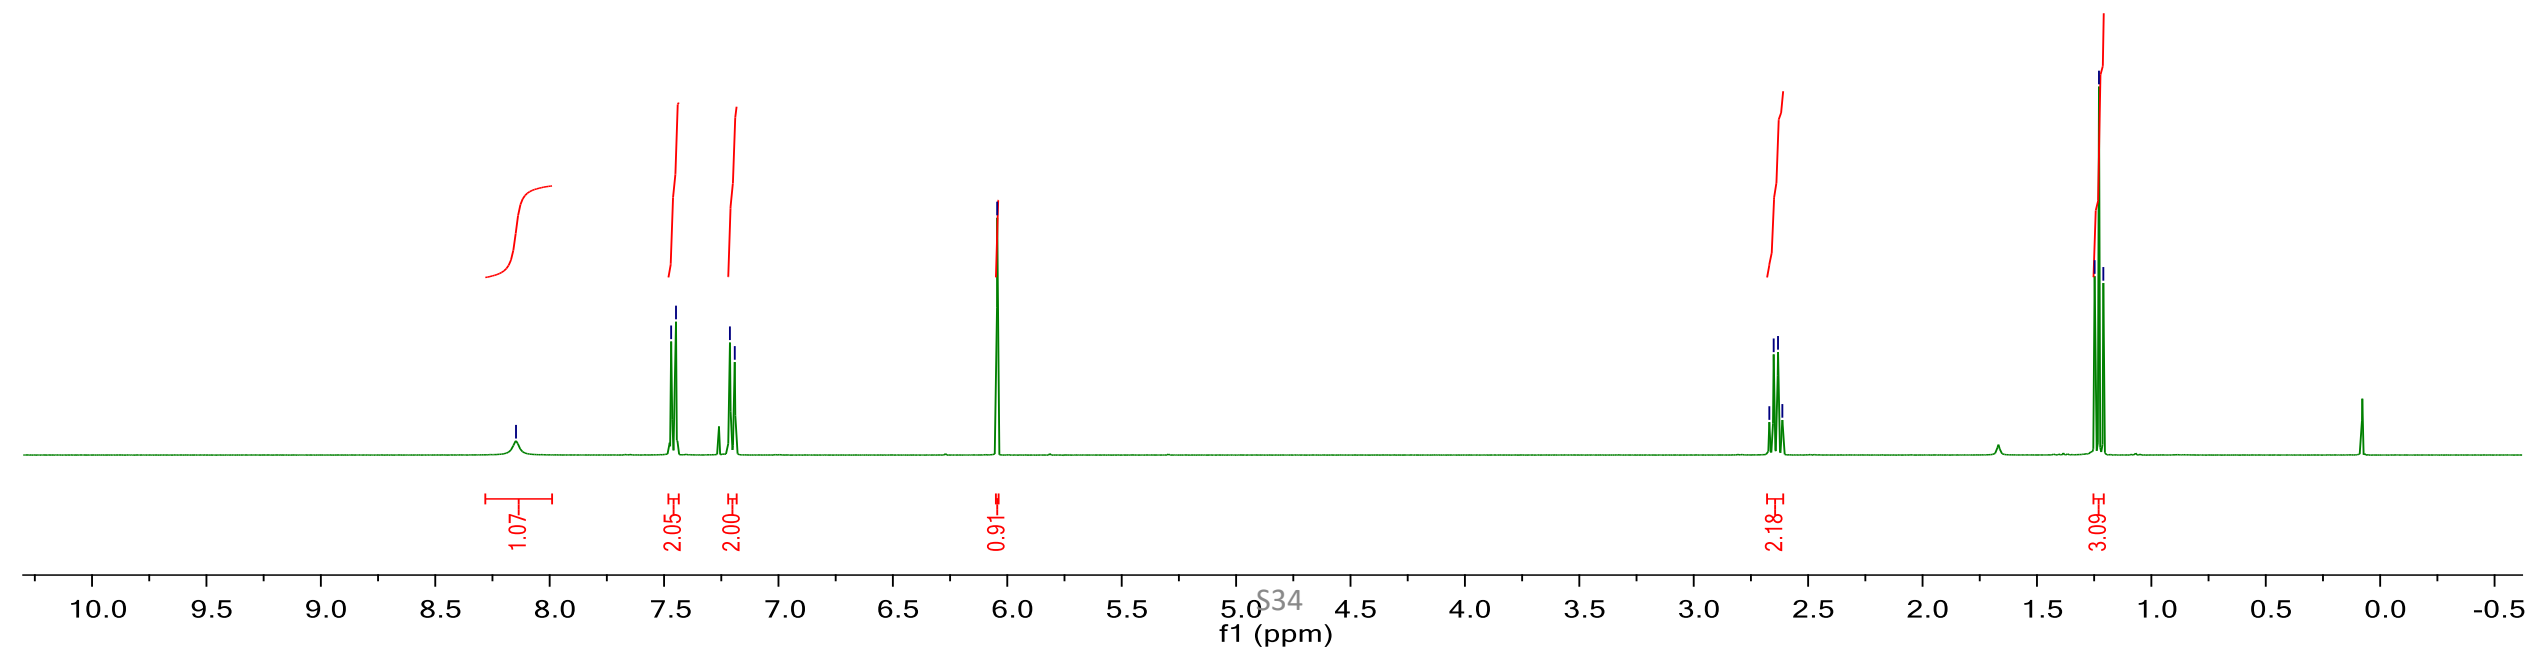

**$^{13}\text{C} \{^1\text{H}\}$  NMR spectrum**  
**Solvent:  $\text{CDCl}_3$**   
**Spectrometer Frequency: 100 MHz**



— 162.3270 — 142.5313 — 134.4091 — 129.1484 — 120.9948 — 67.5006 — 28.9478 — 16.1808

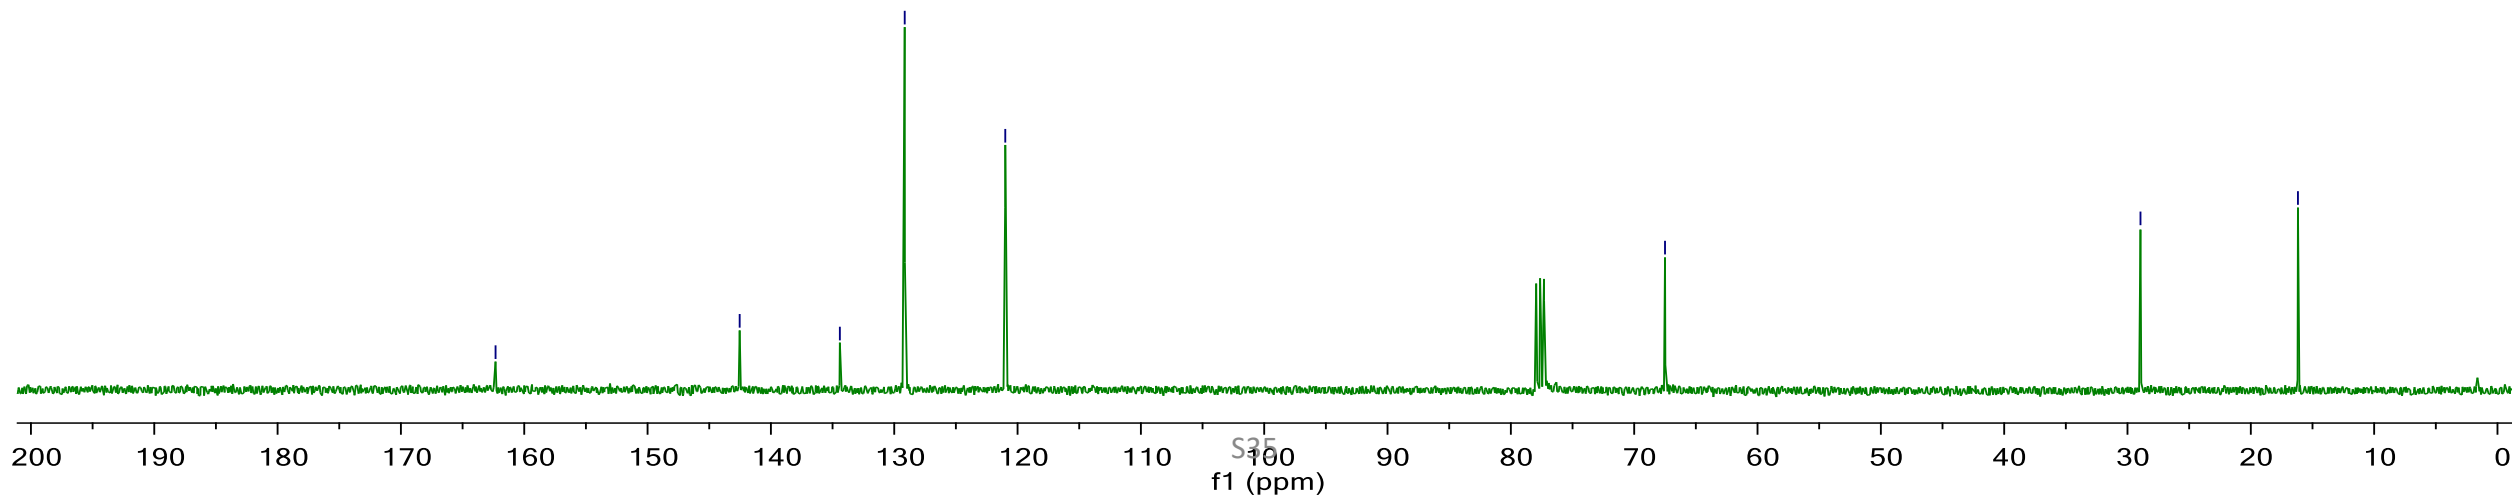

**$^1\text{H}$  NMR spectrum**  
**Solvent:  $\text{CDCl}_3$**   
**Spectrometer Frequency: 400 MHz**

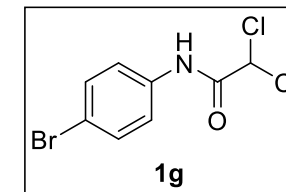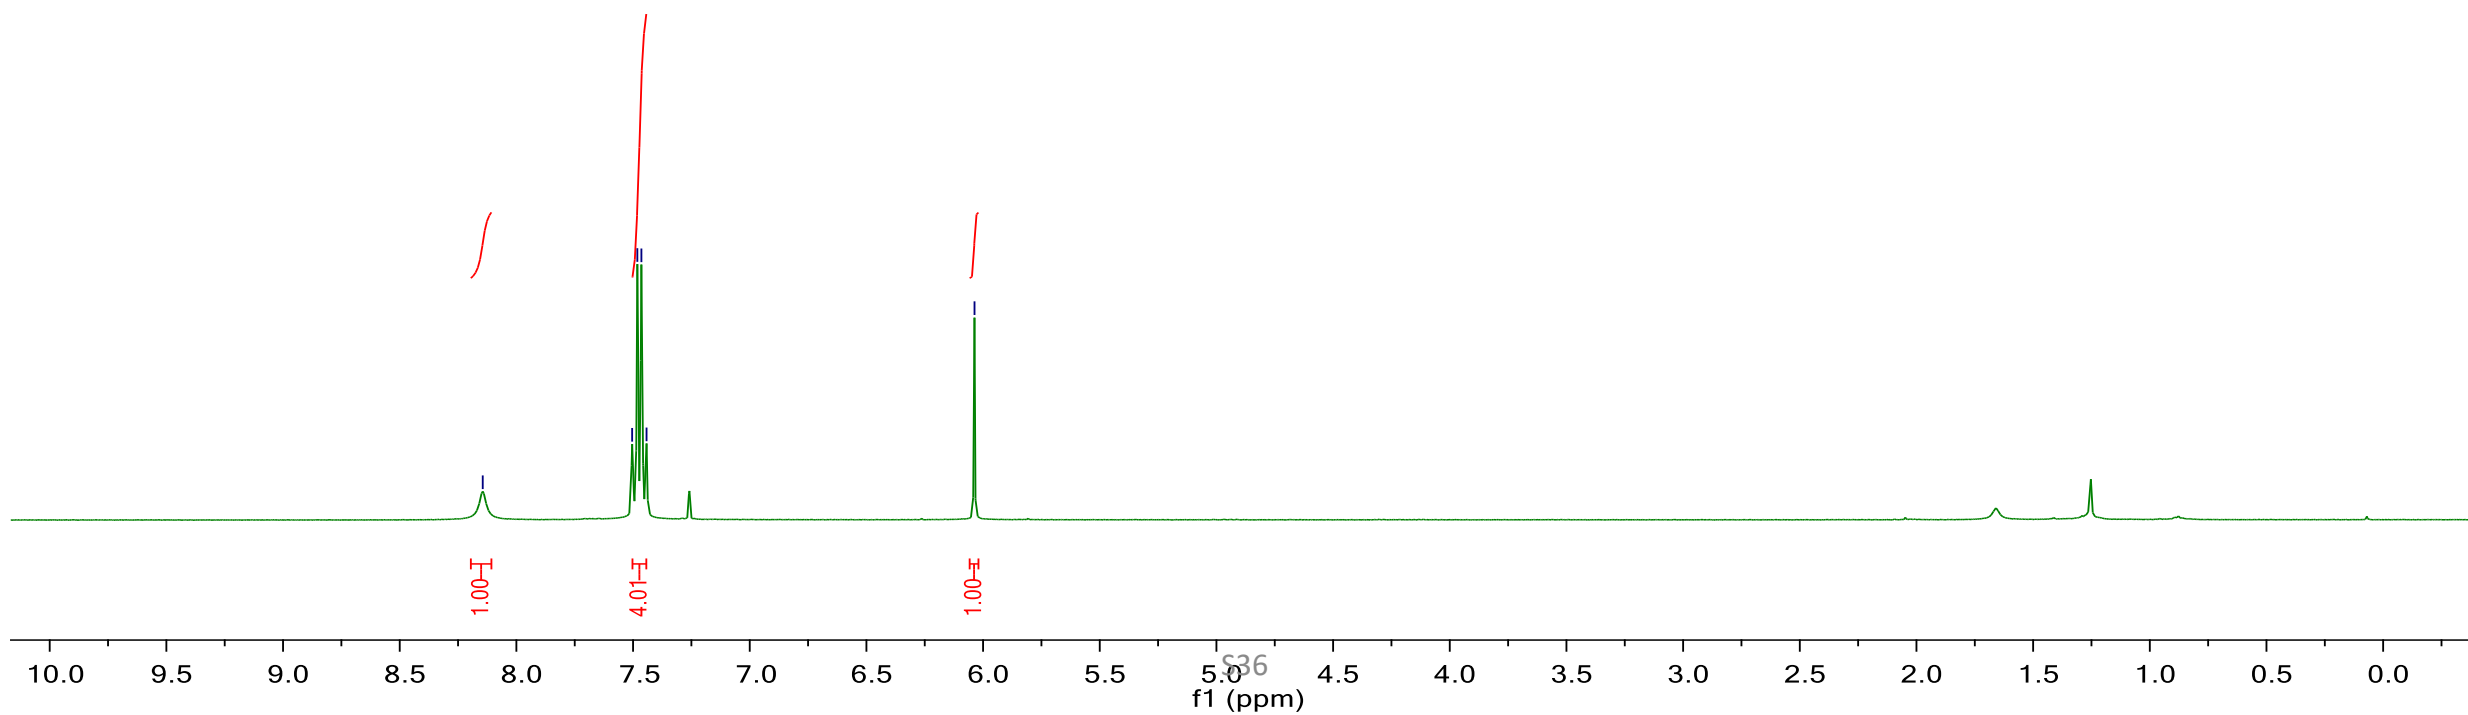

**$^{13}\text{C}$  { $^1\text{H}$ } NMR spectrum**  
**Solvent:  $\text{CDCl}_3$**   
**Spectrometer Frequency: 100 MHz**

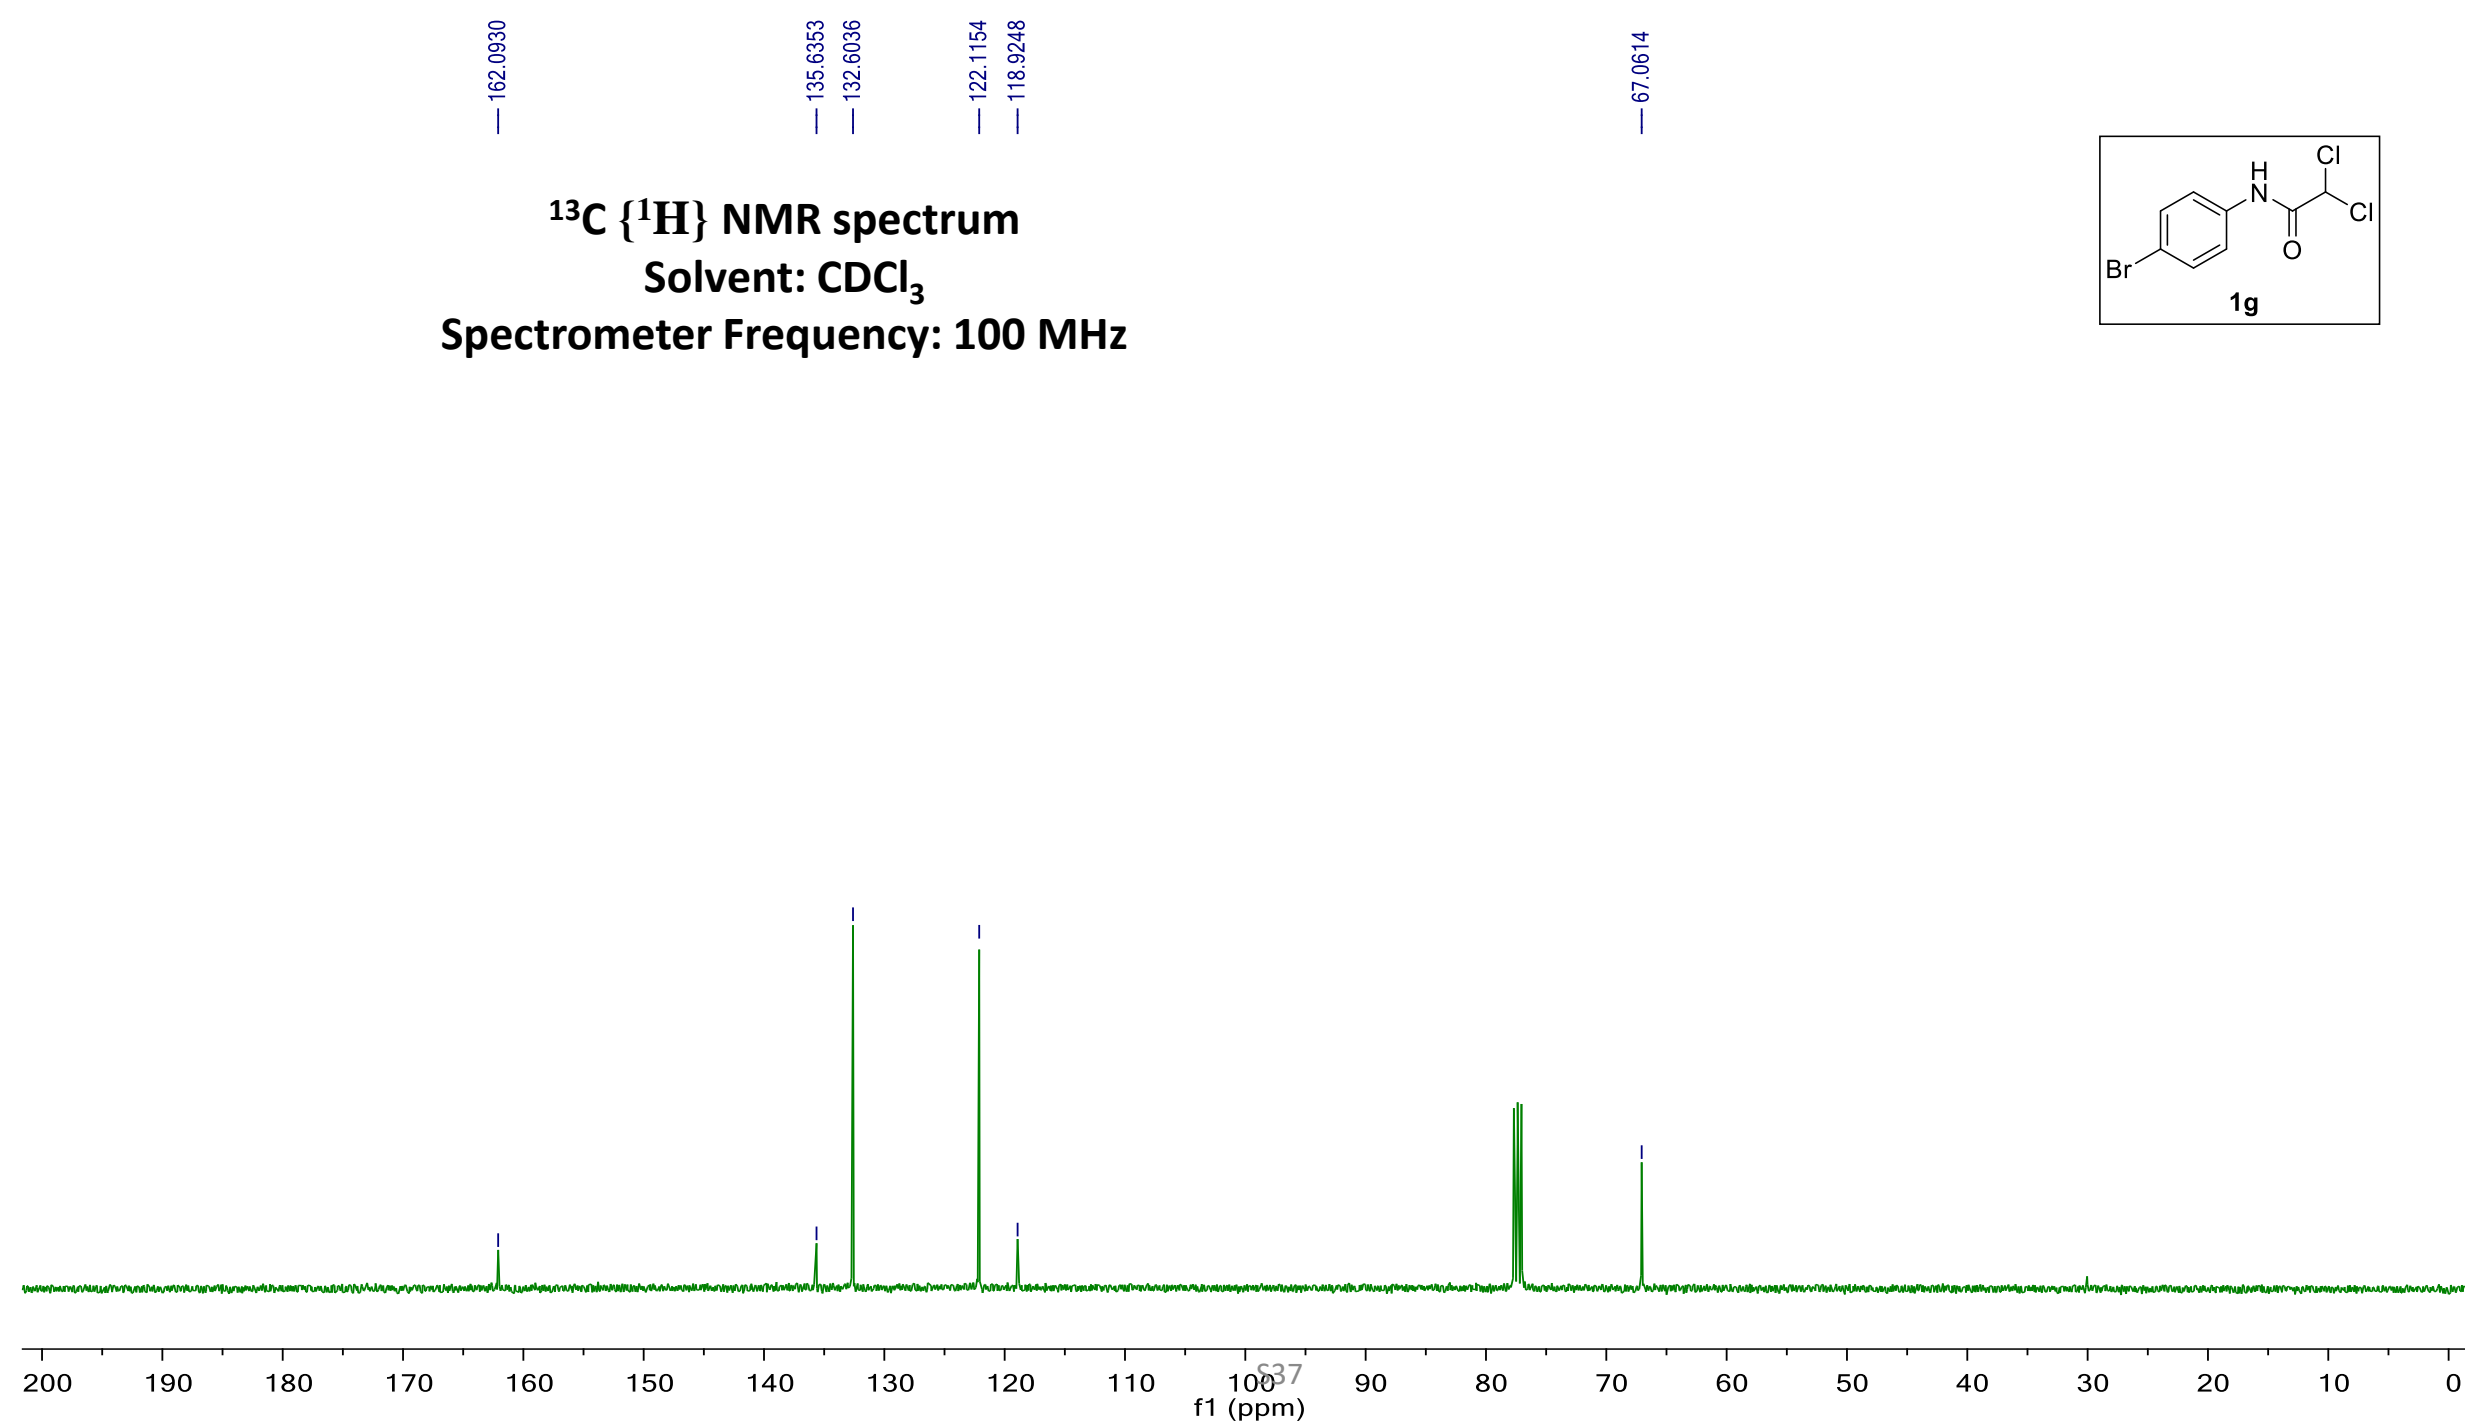

**$^1\text{H}$  NMR spectrum**  
**Solvent:  $\text{CDCl}_3$**   
**Spectrometer Frequency: 400 MHz**

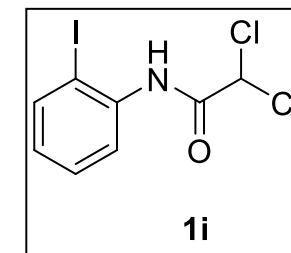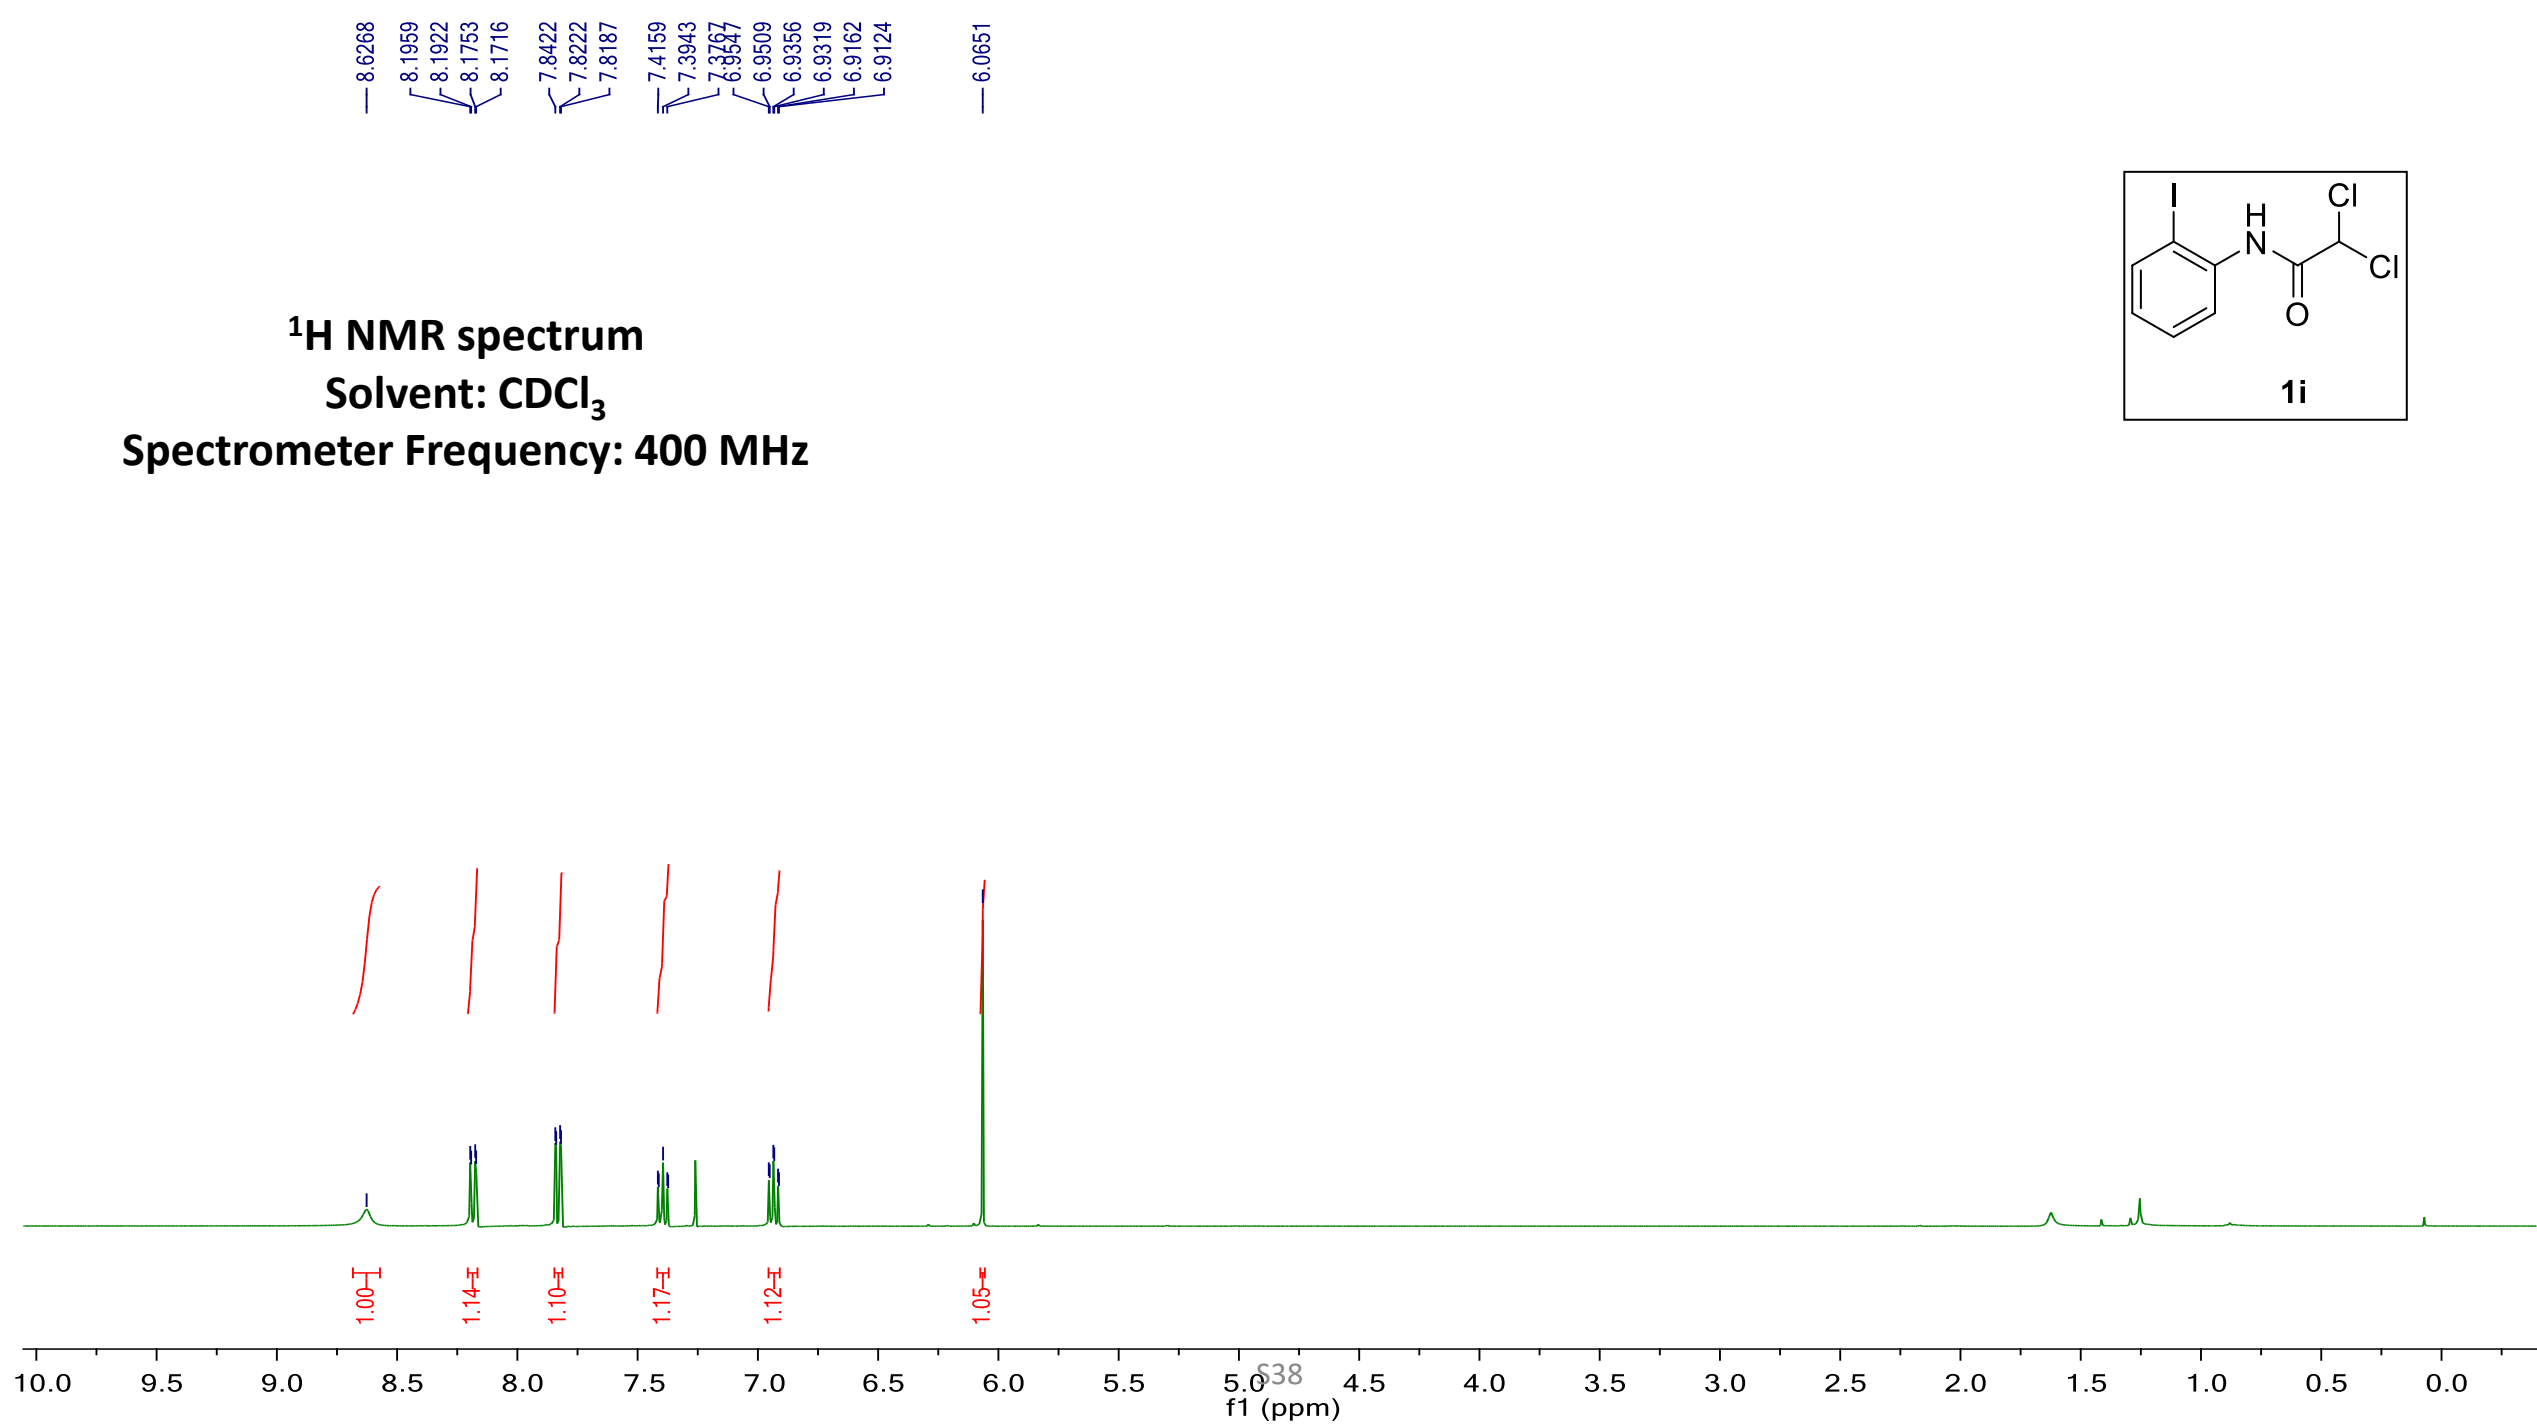

**$^{13}\text{C}$   $\{^1\text{H}\}$  NMR spectrum**  
**Solvent:  $\text{CDCl}_3$**   
**Spectrometer Frequency: 100 MHz**

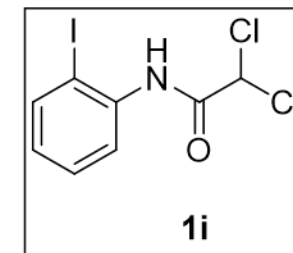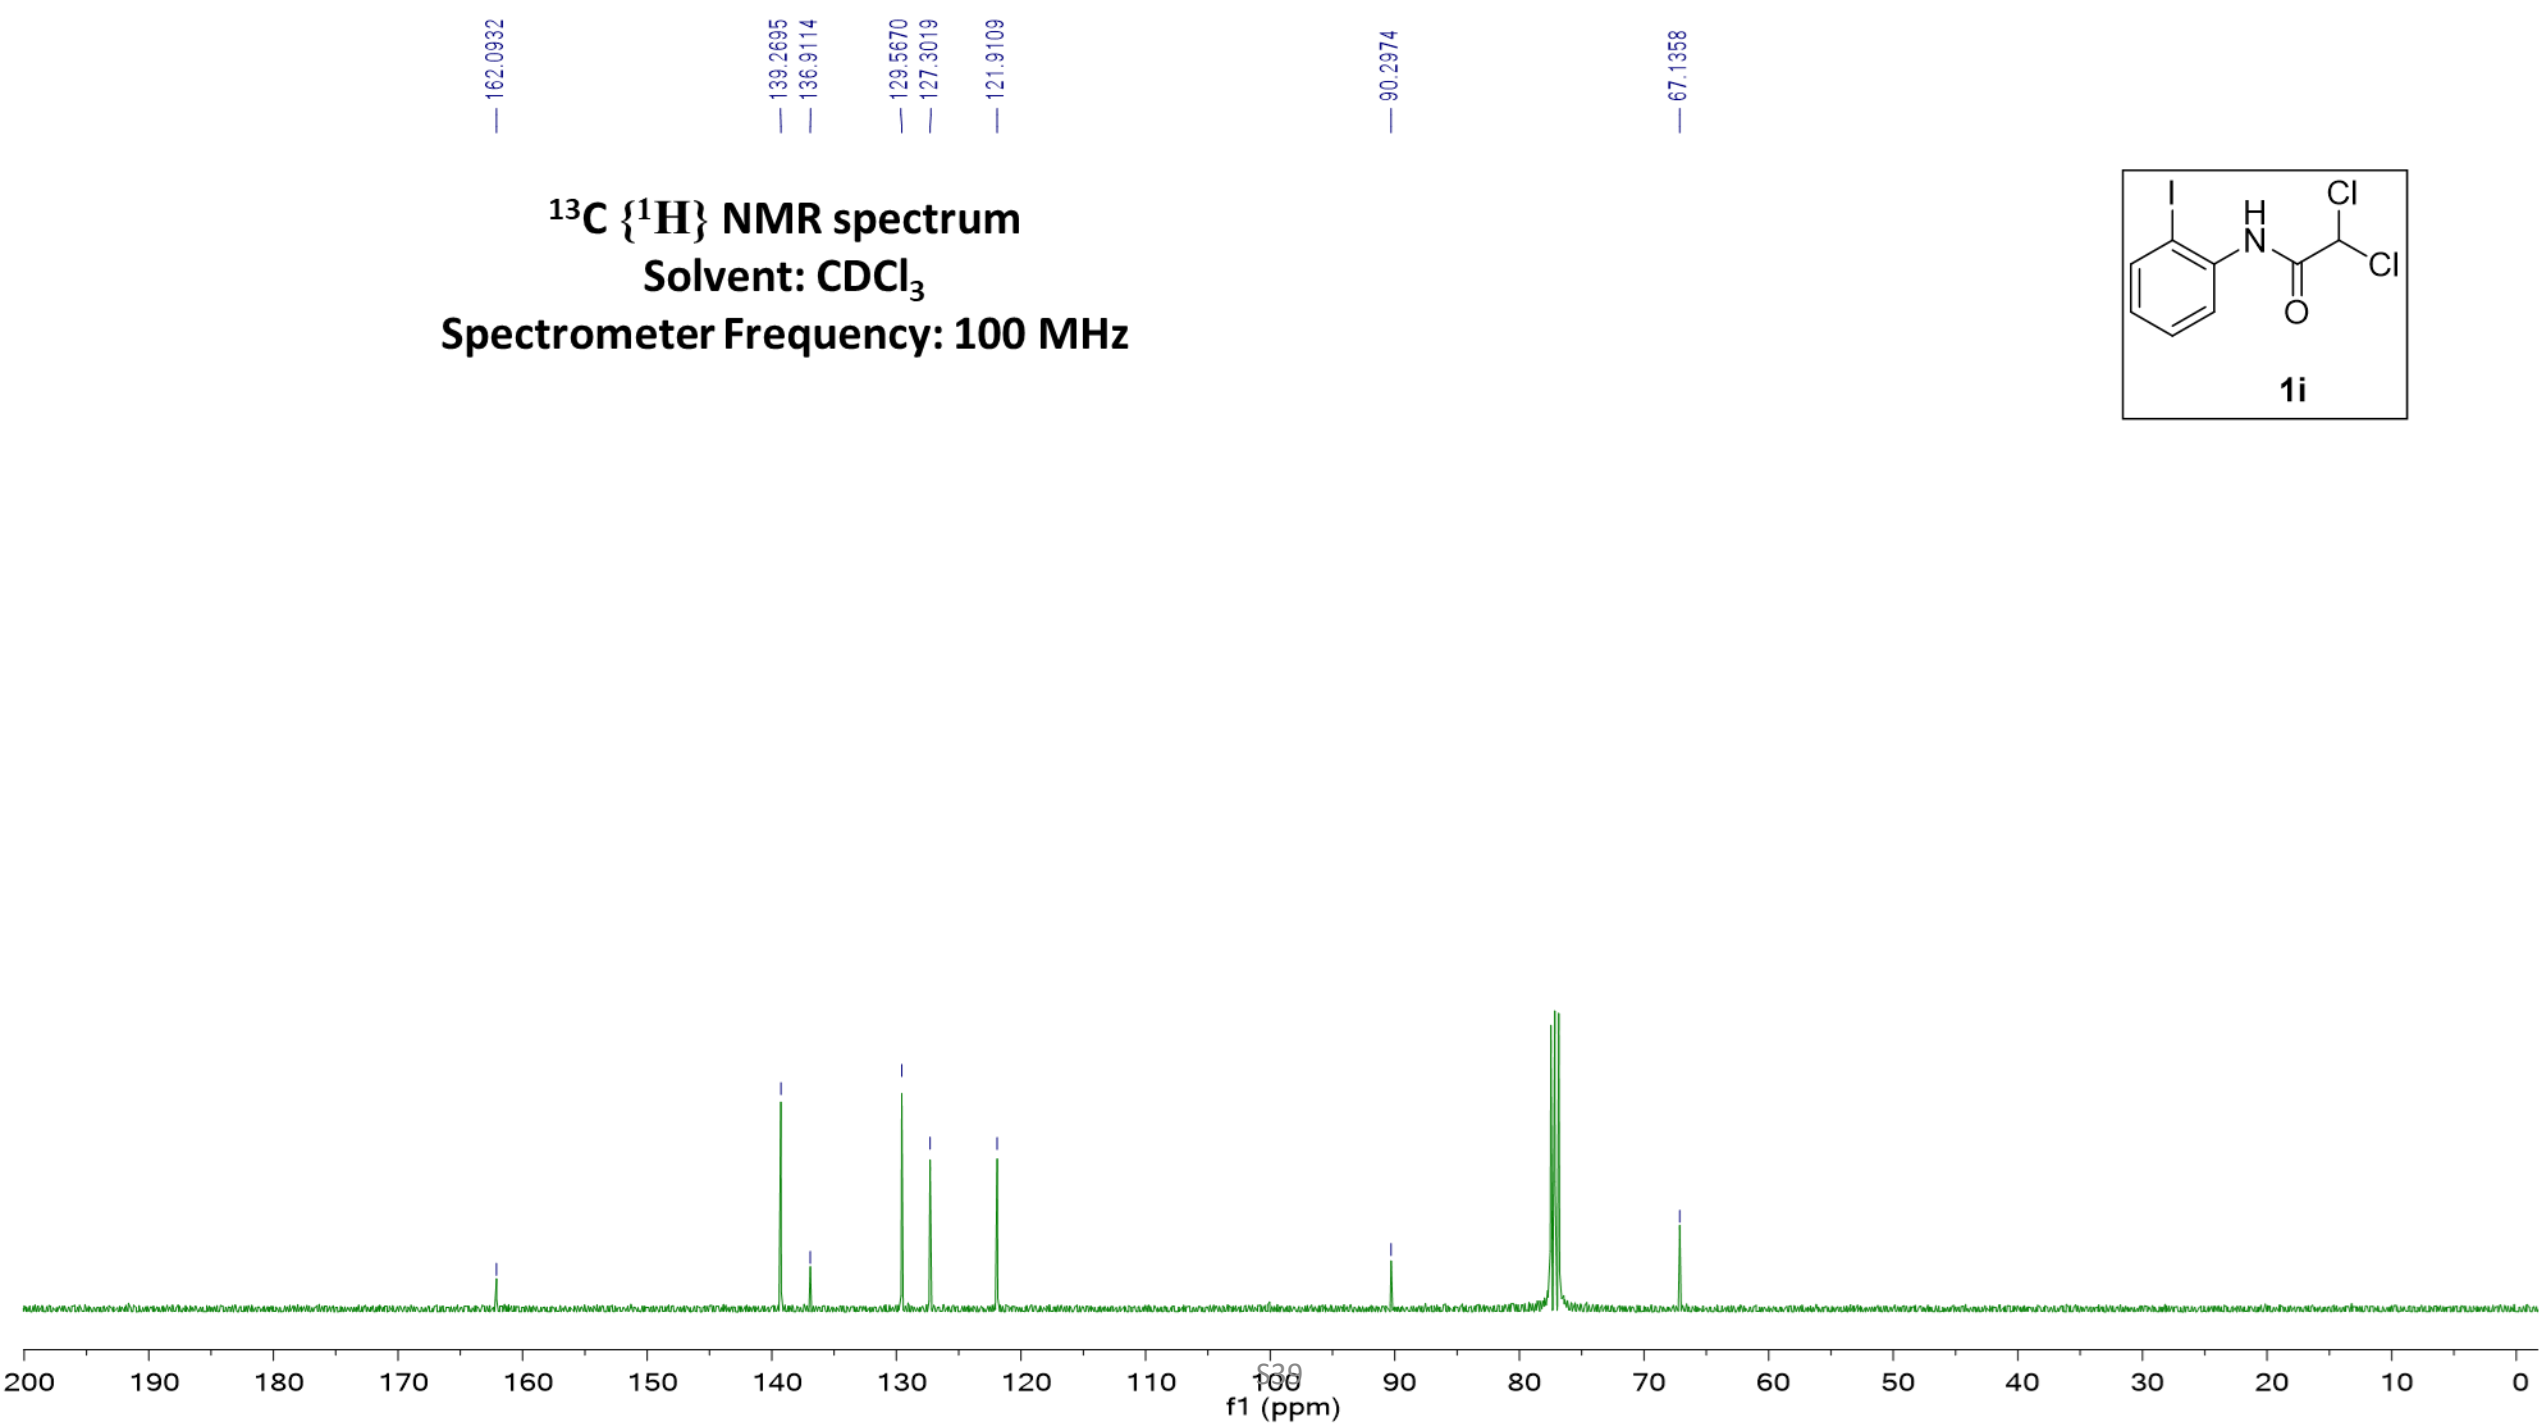

**$^1\text{H}$  NMR spectrum**  
**Solvent:  $\text{CDCl}_3$**   
**Spectrometer Frequency: 400 MHz**

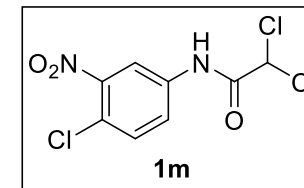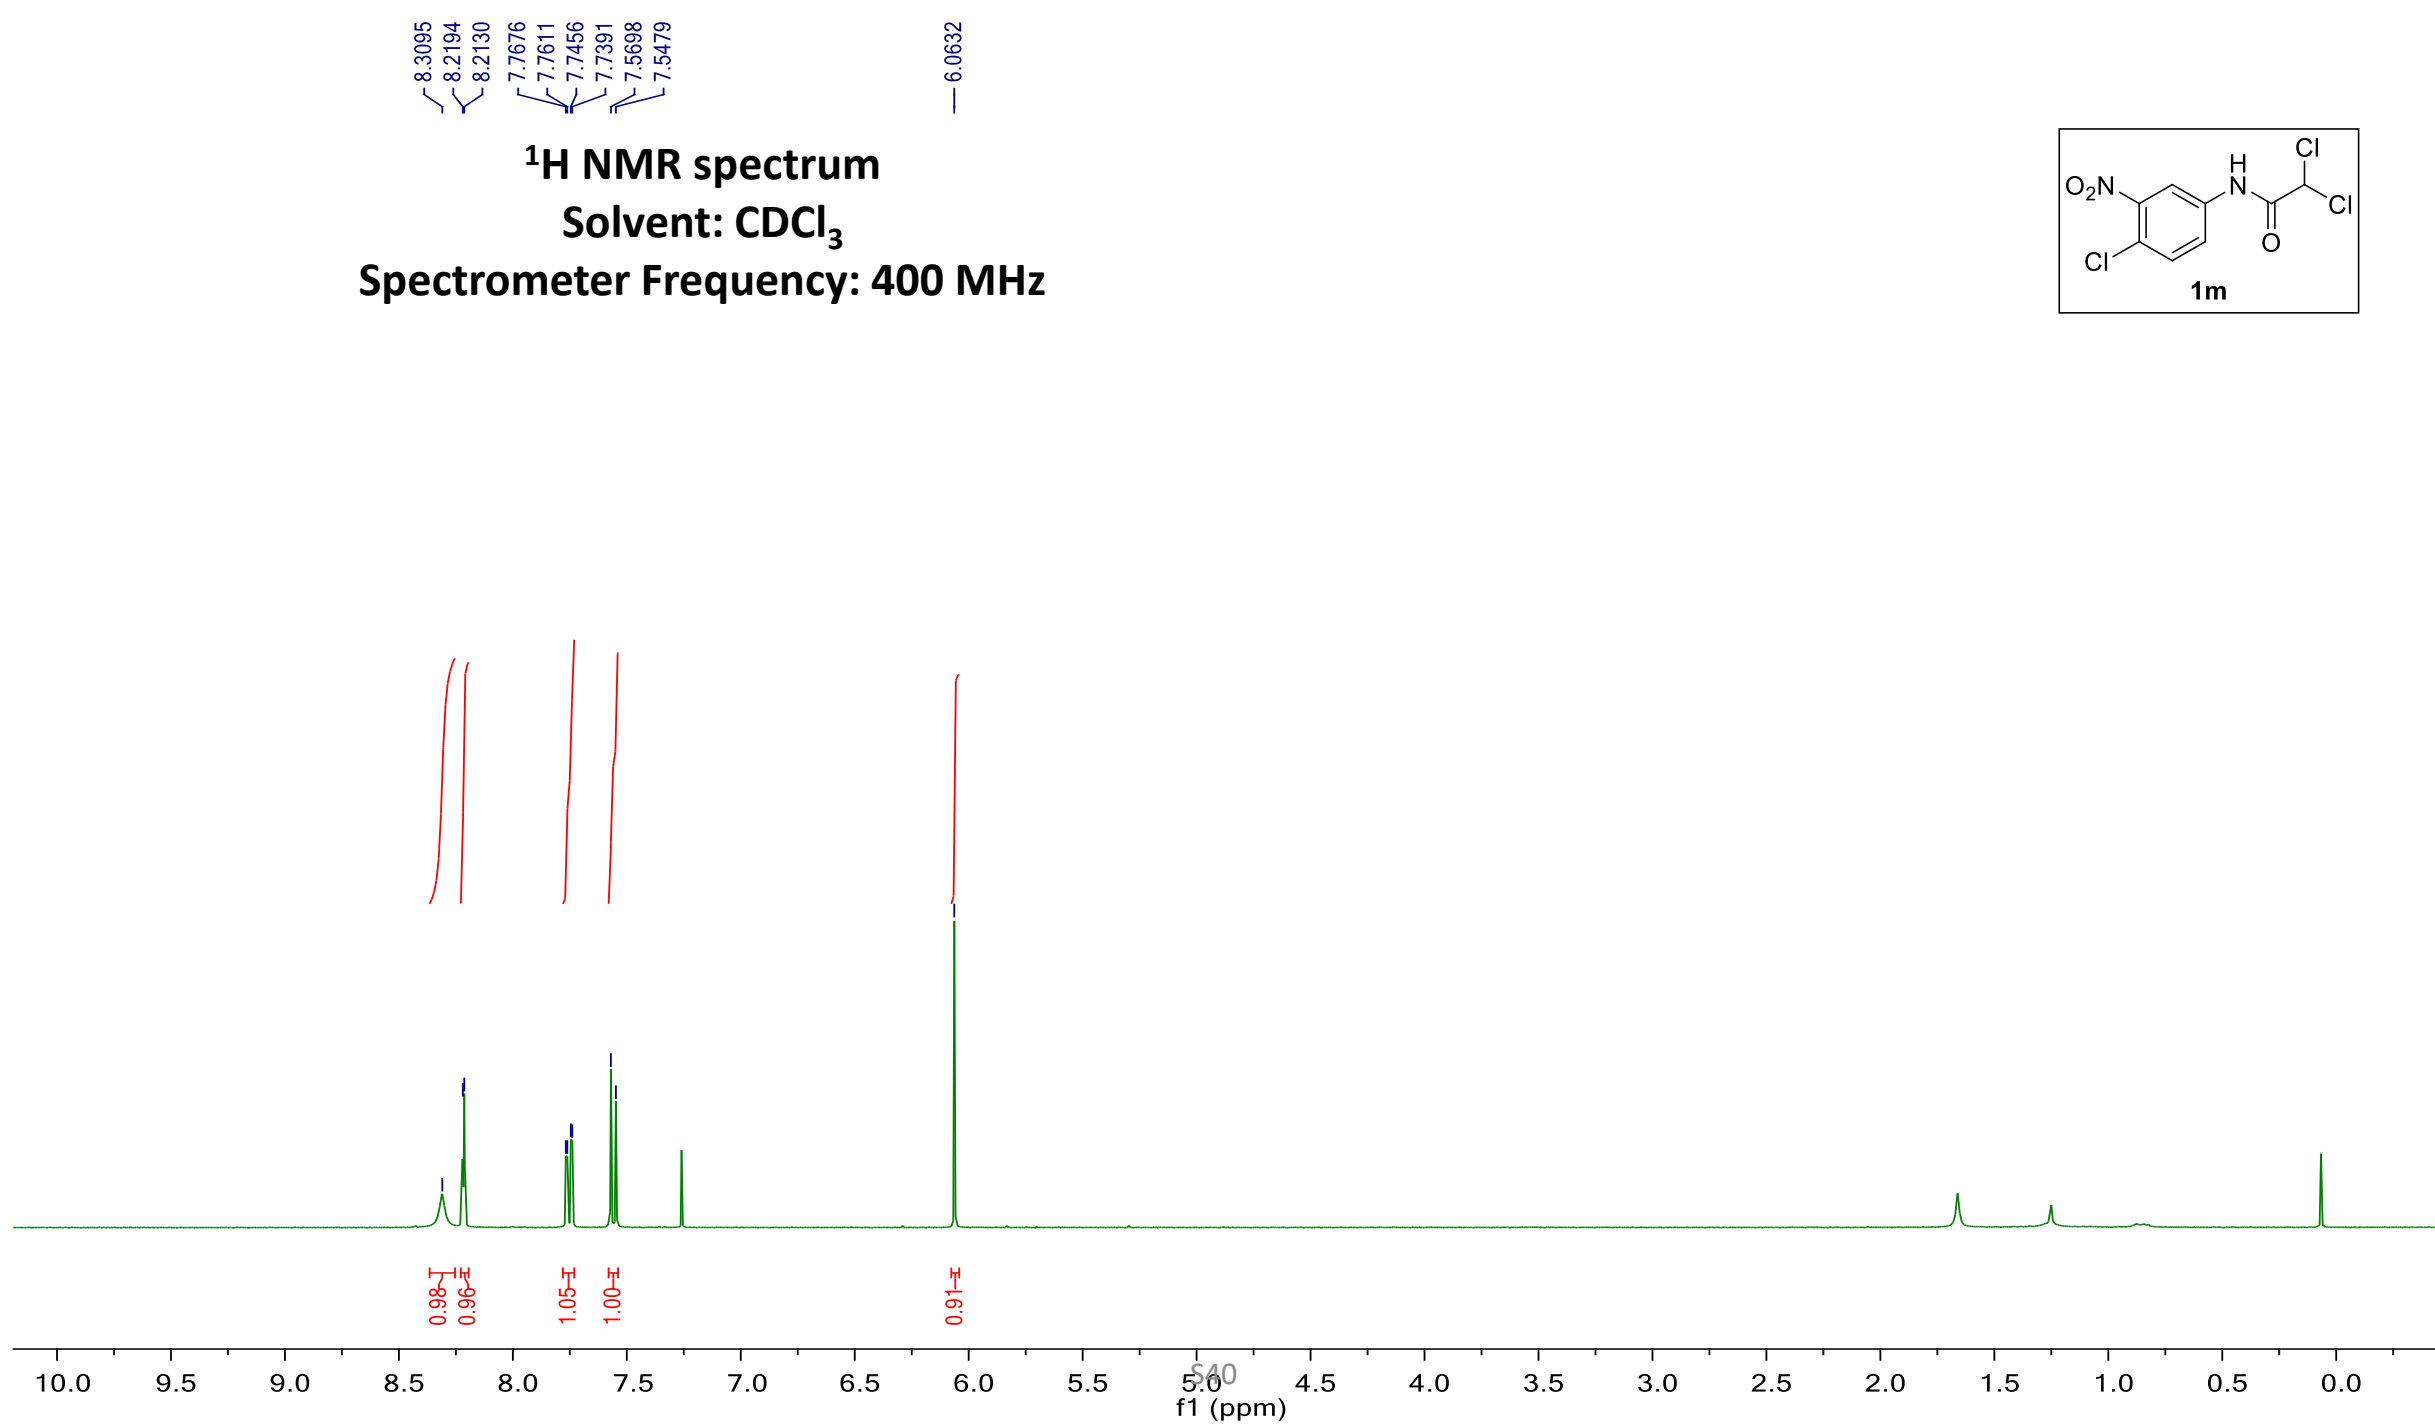

**$^{13}\text{C}$  { $^1\text{H}$ } NMR spectrum**  
**Solvent:  $\text{CDCl}_3$**   
**Spectrometer Frequency: 100 MHz**

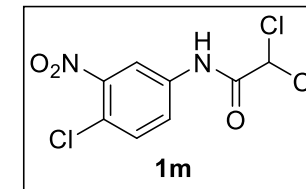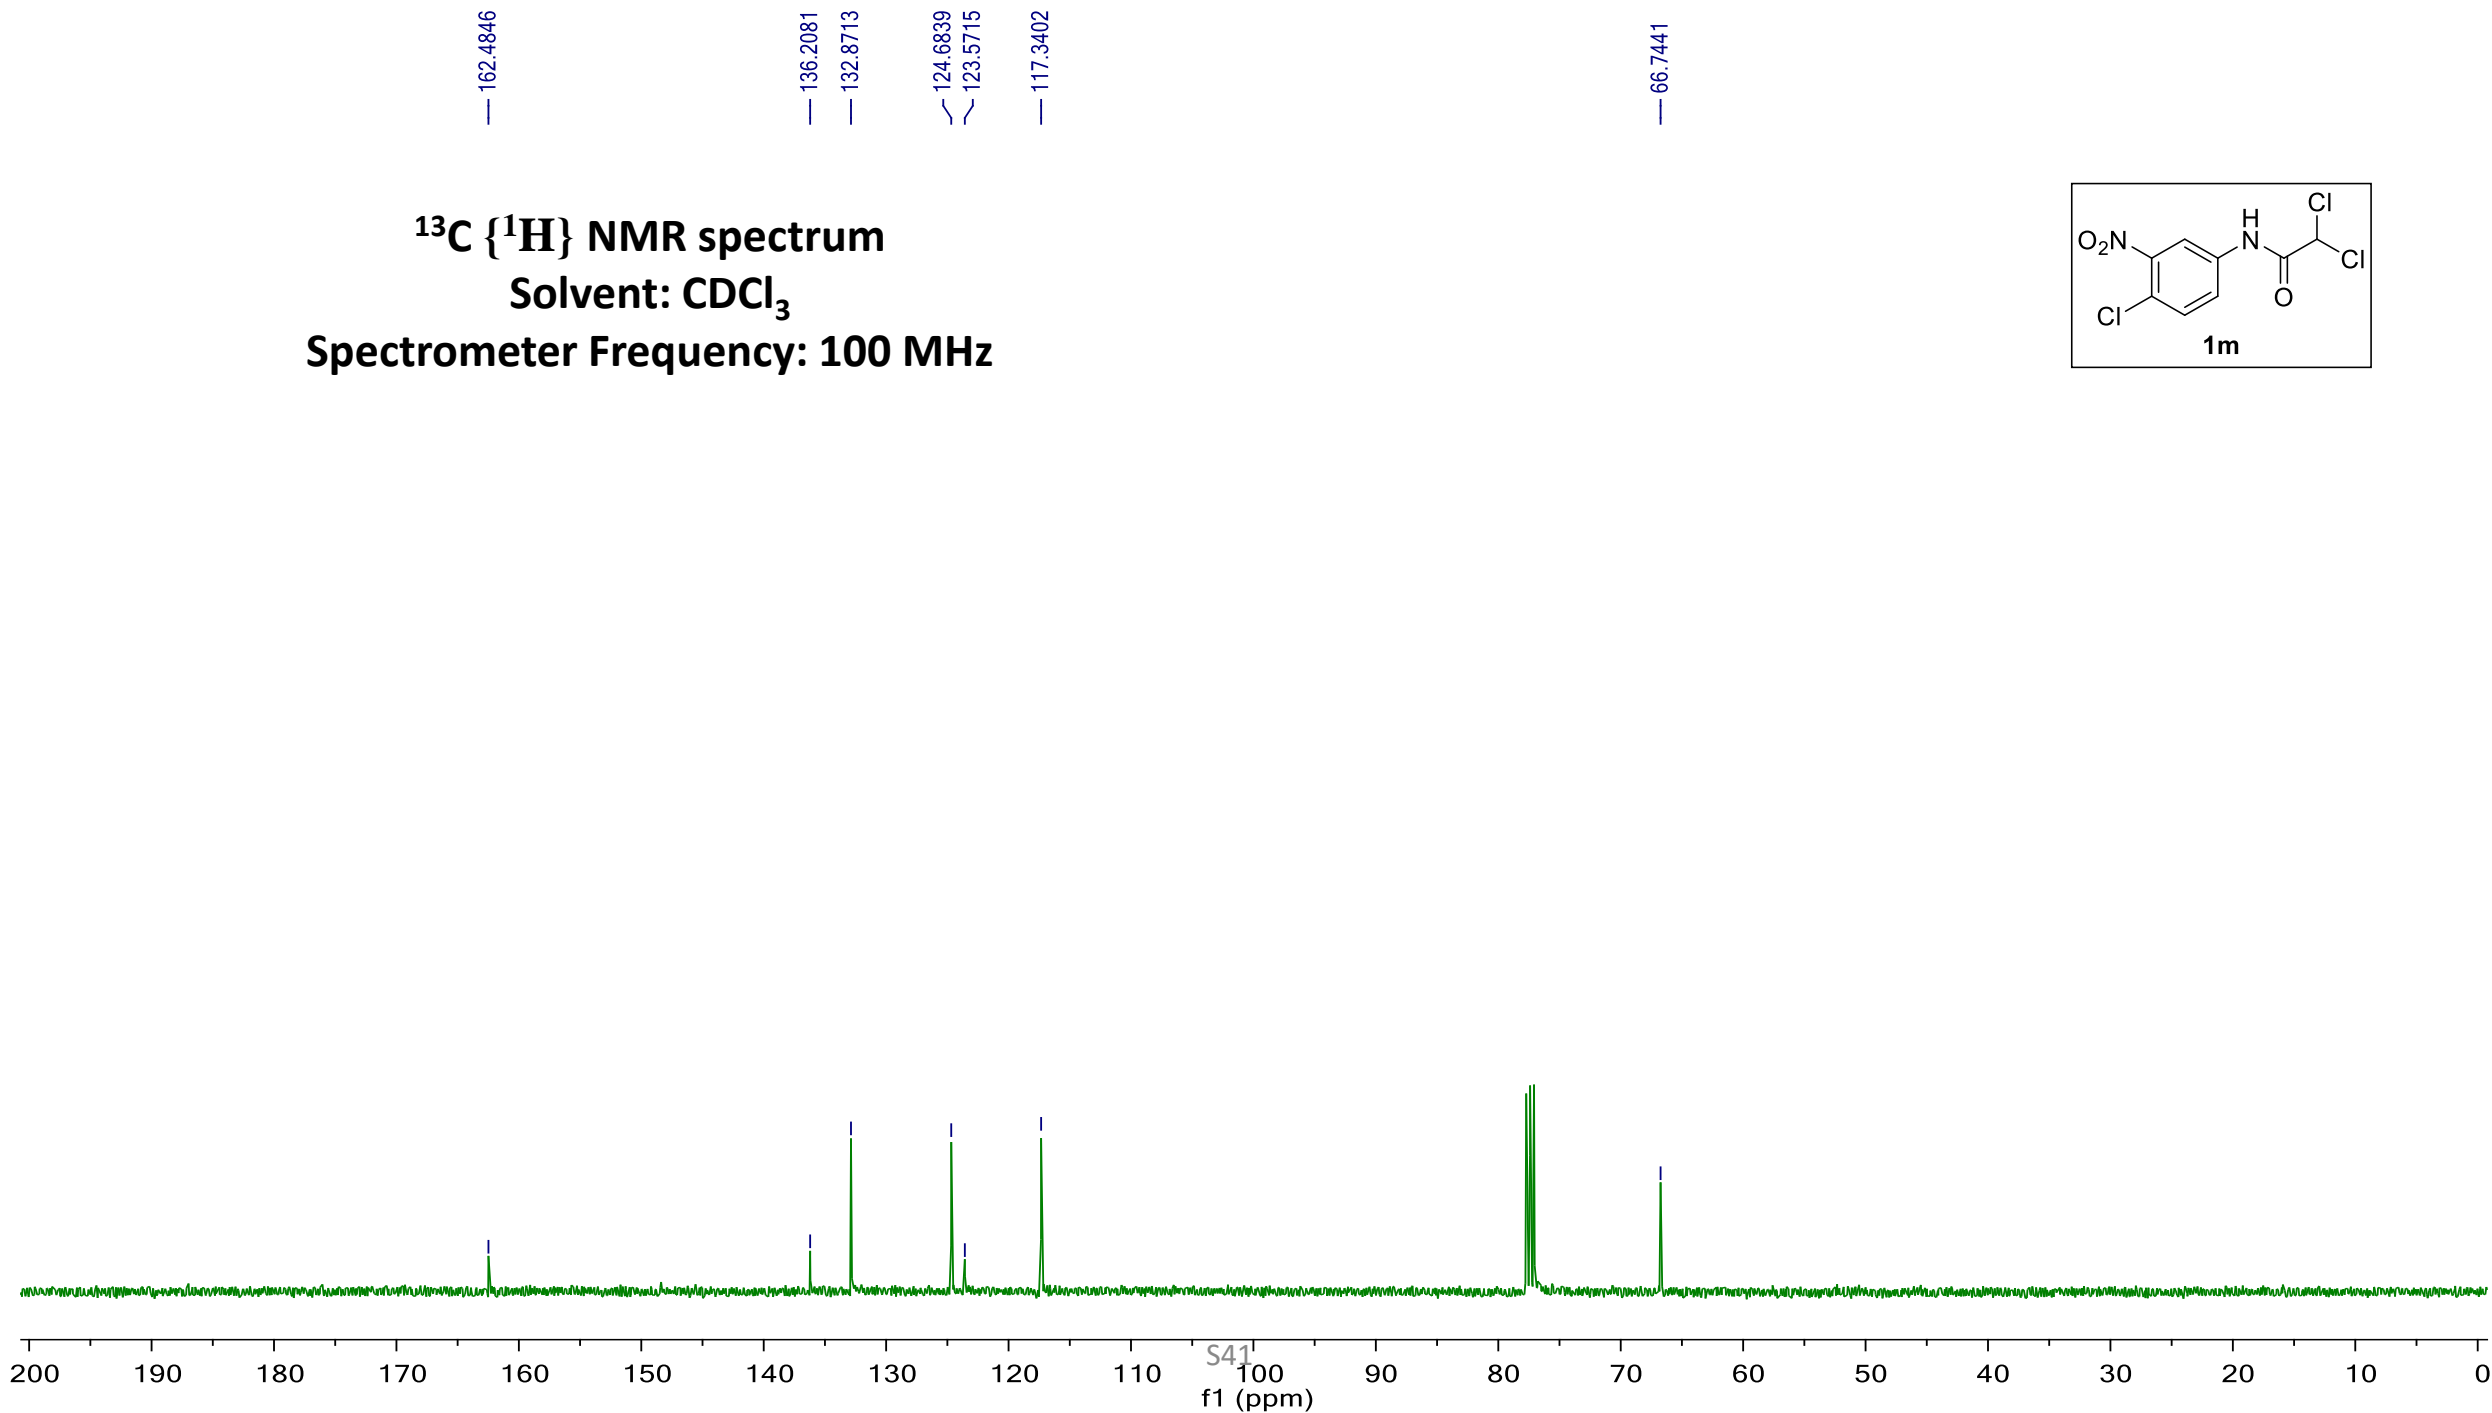

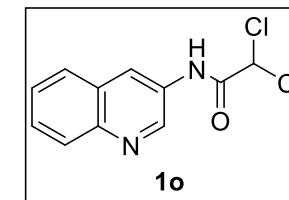

**$^1\text{H}$  NMR spectrum**  
**Solvent:  $\text{CDCl}_3$**   
**Spectrometer Frequency: 400 MHz**

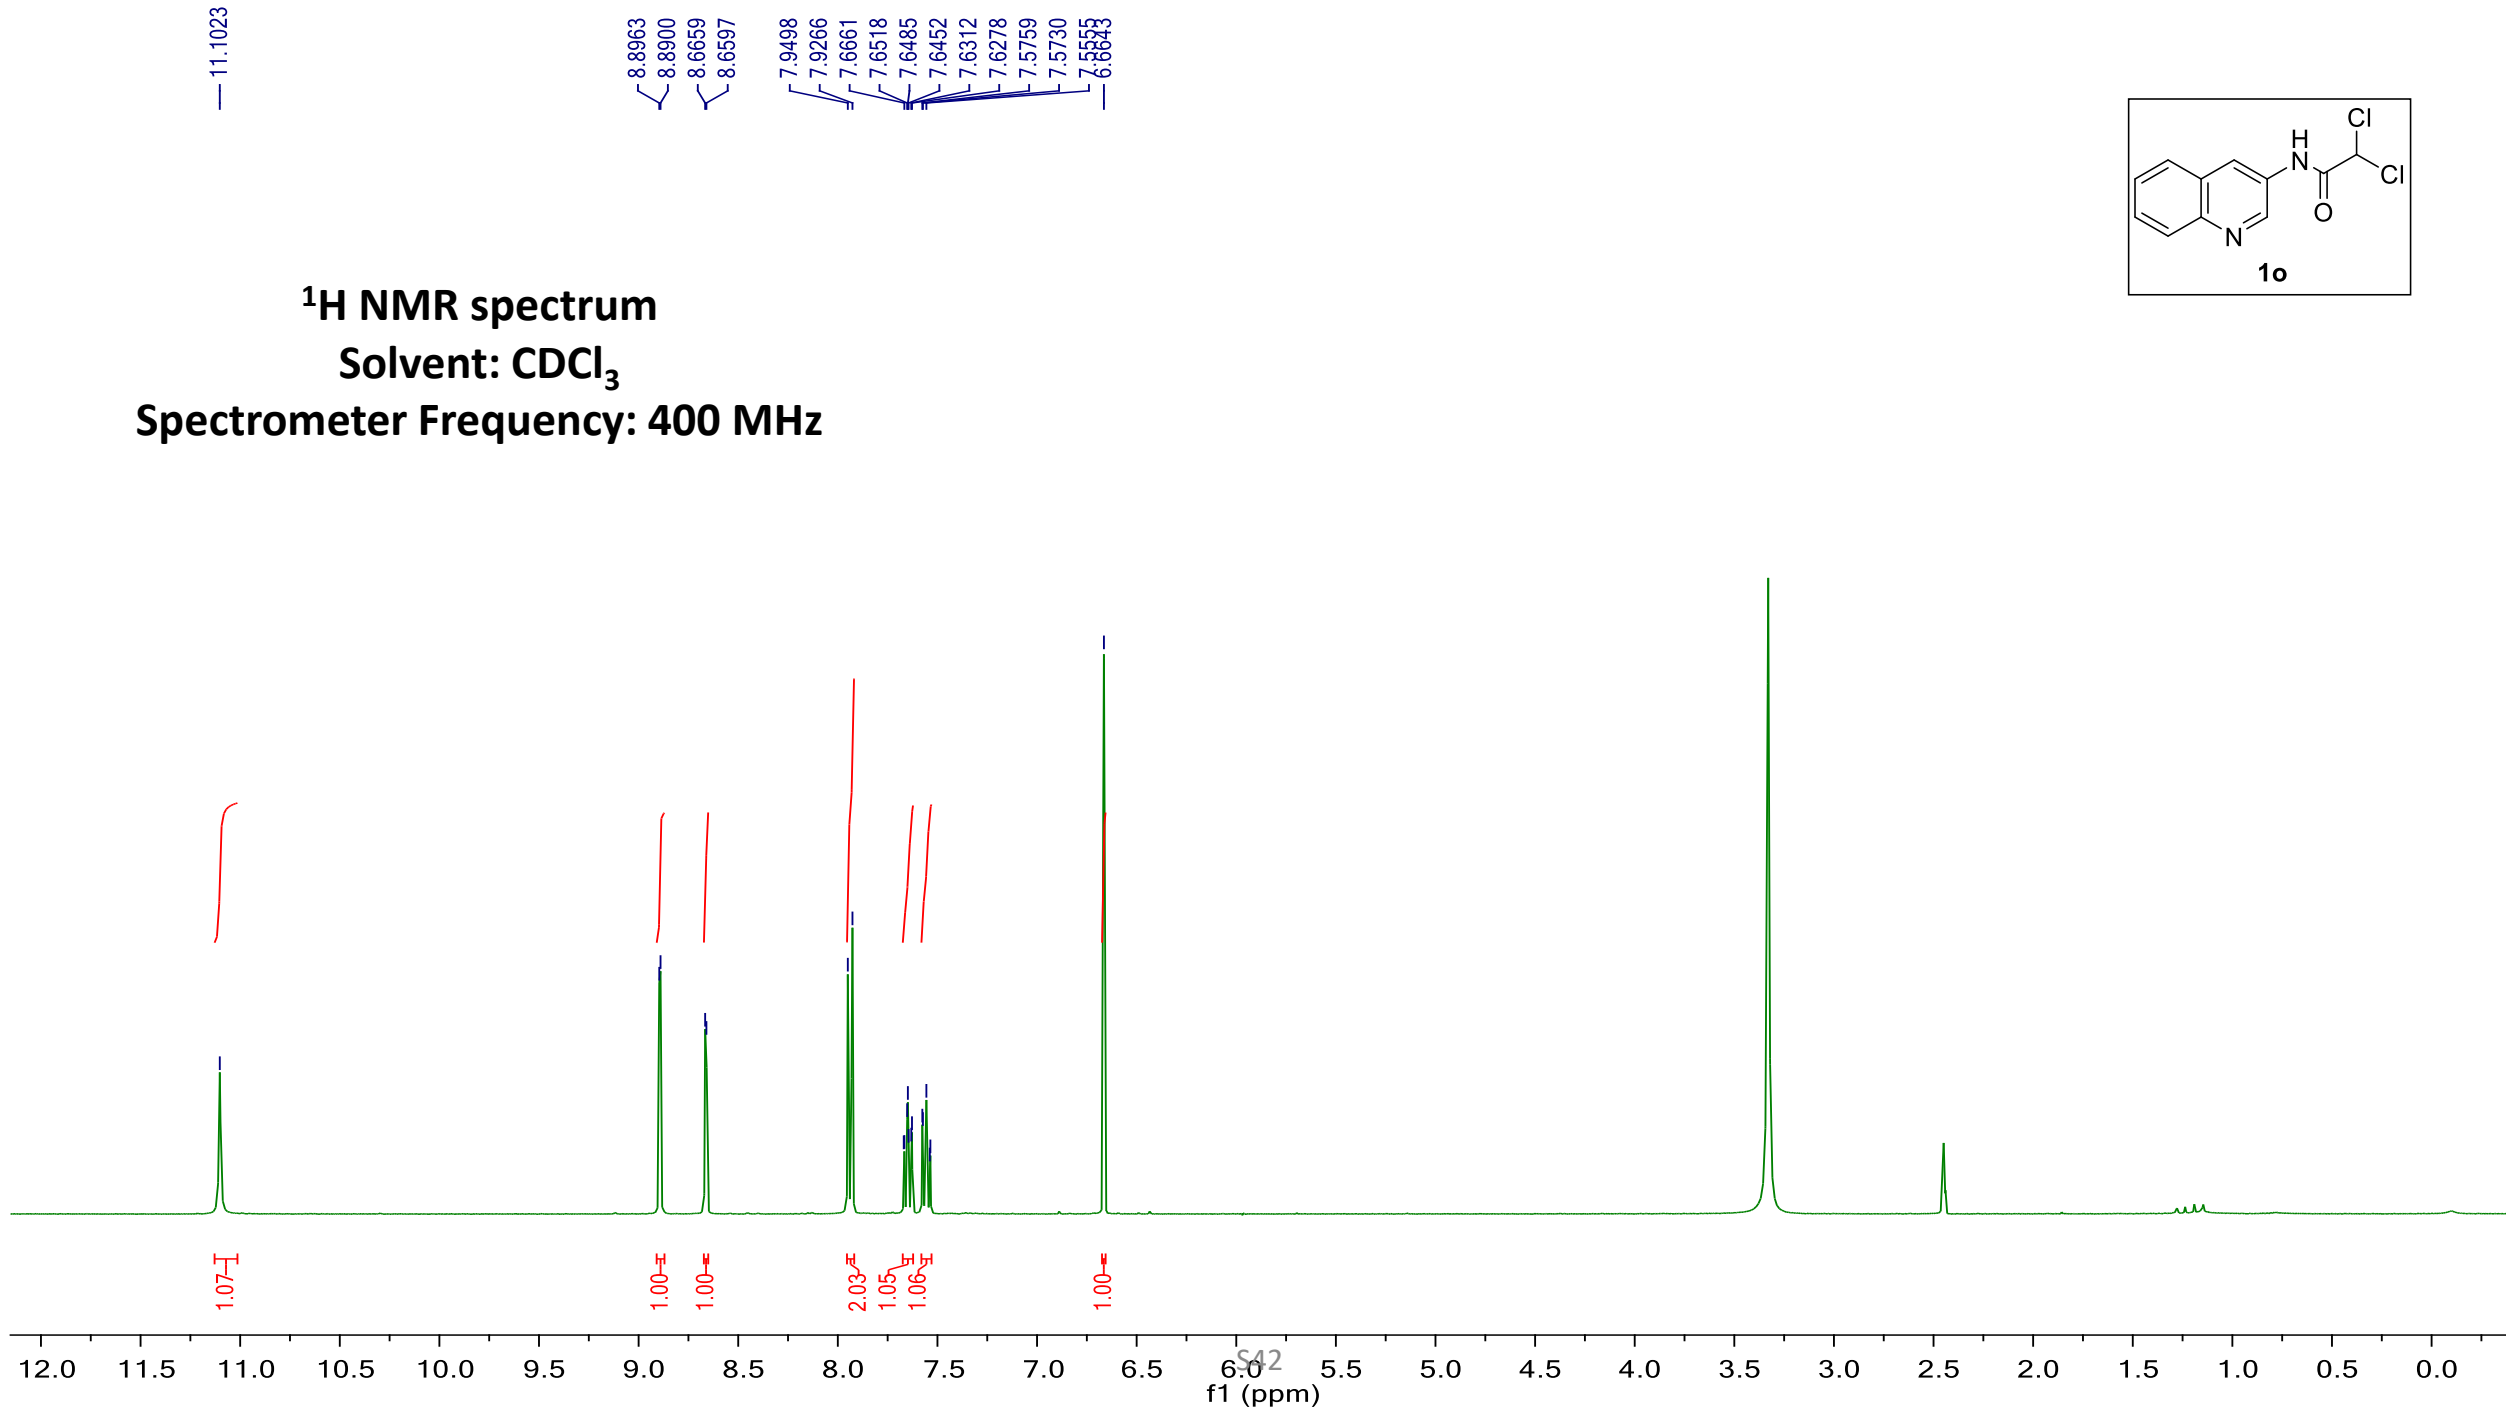

**$^{13}\text{C}$  { $^1\text{H}$ } NMR spectrum**

**Solvent:  $\text{DMSO-}d_6$**

**Spectrometer Frequency: 100 MHz**

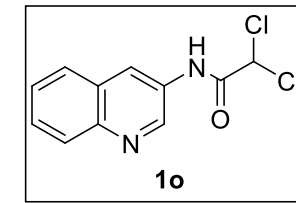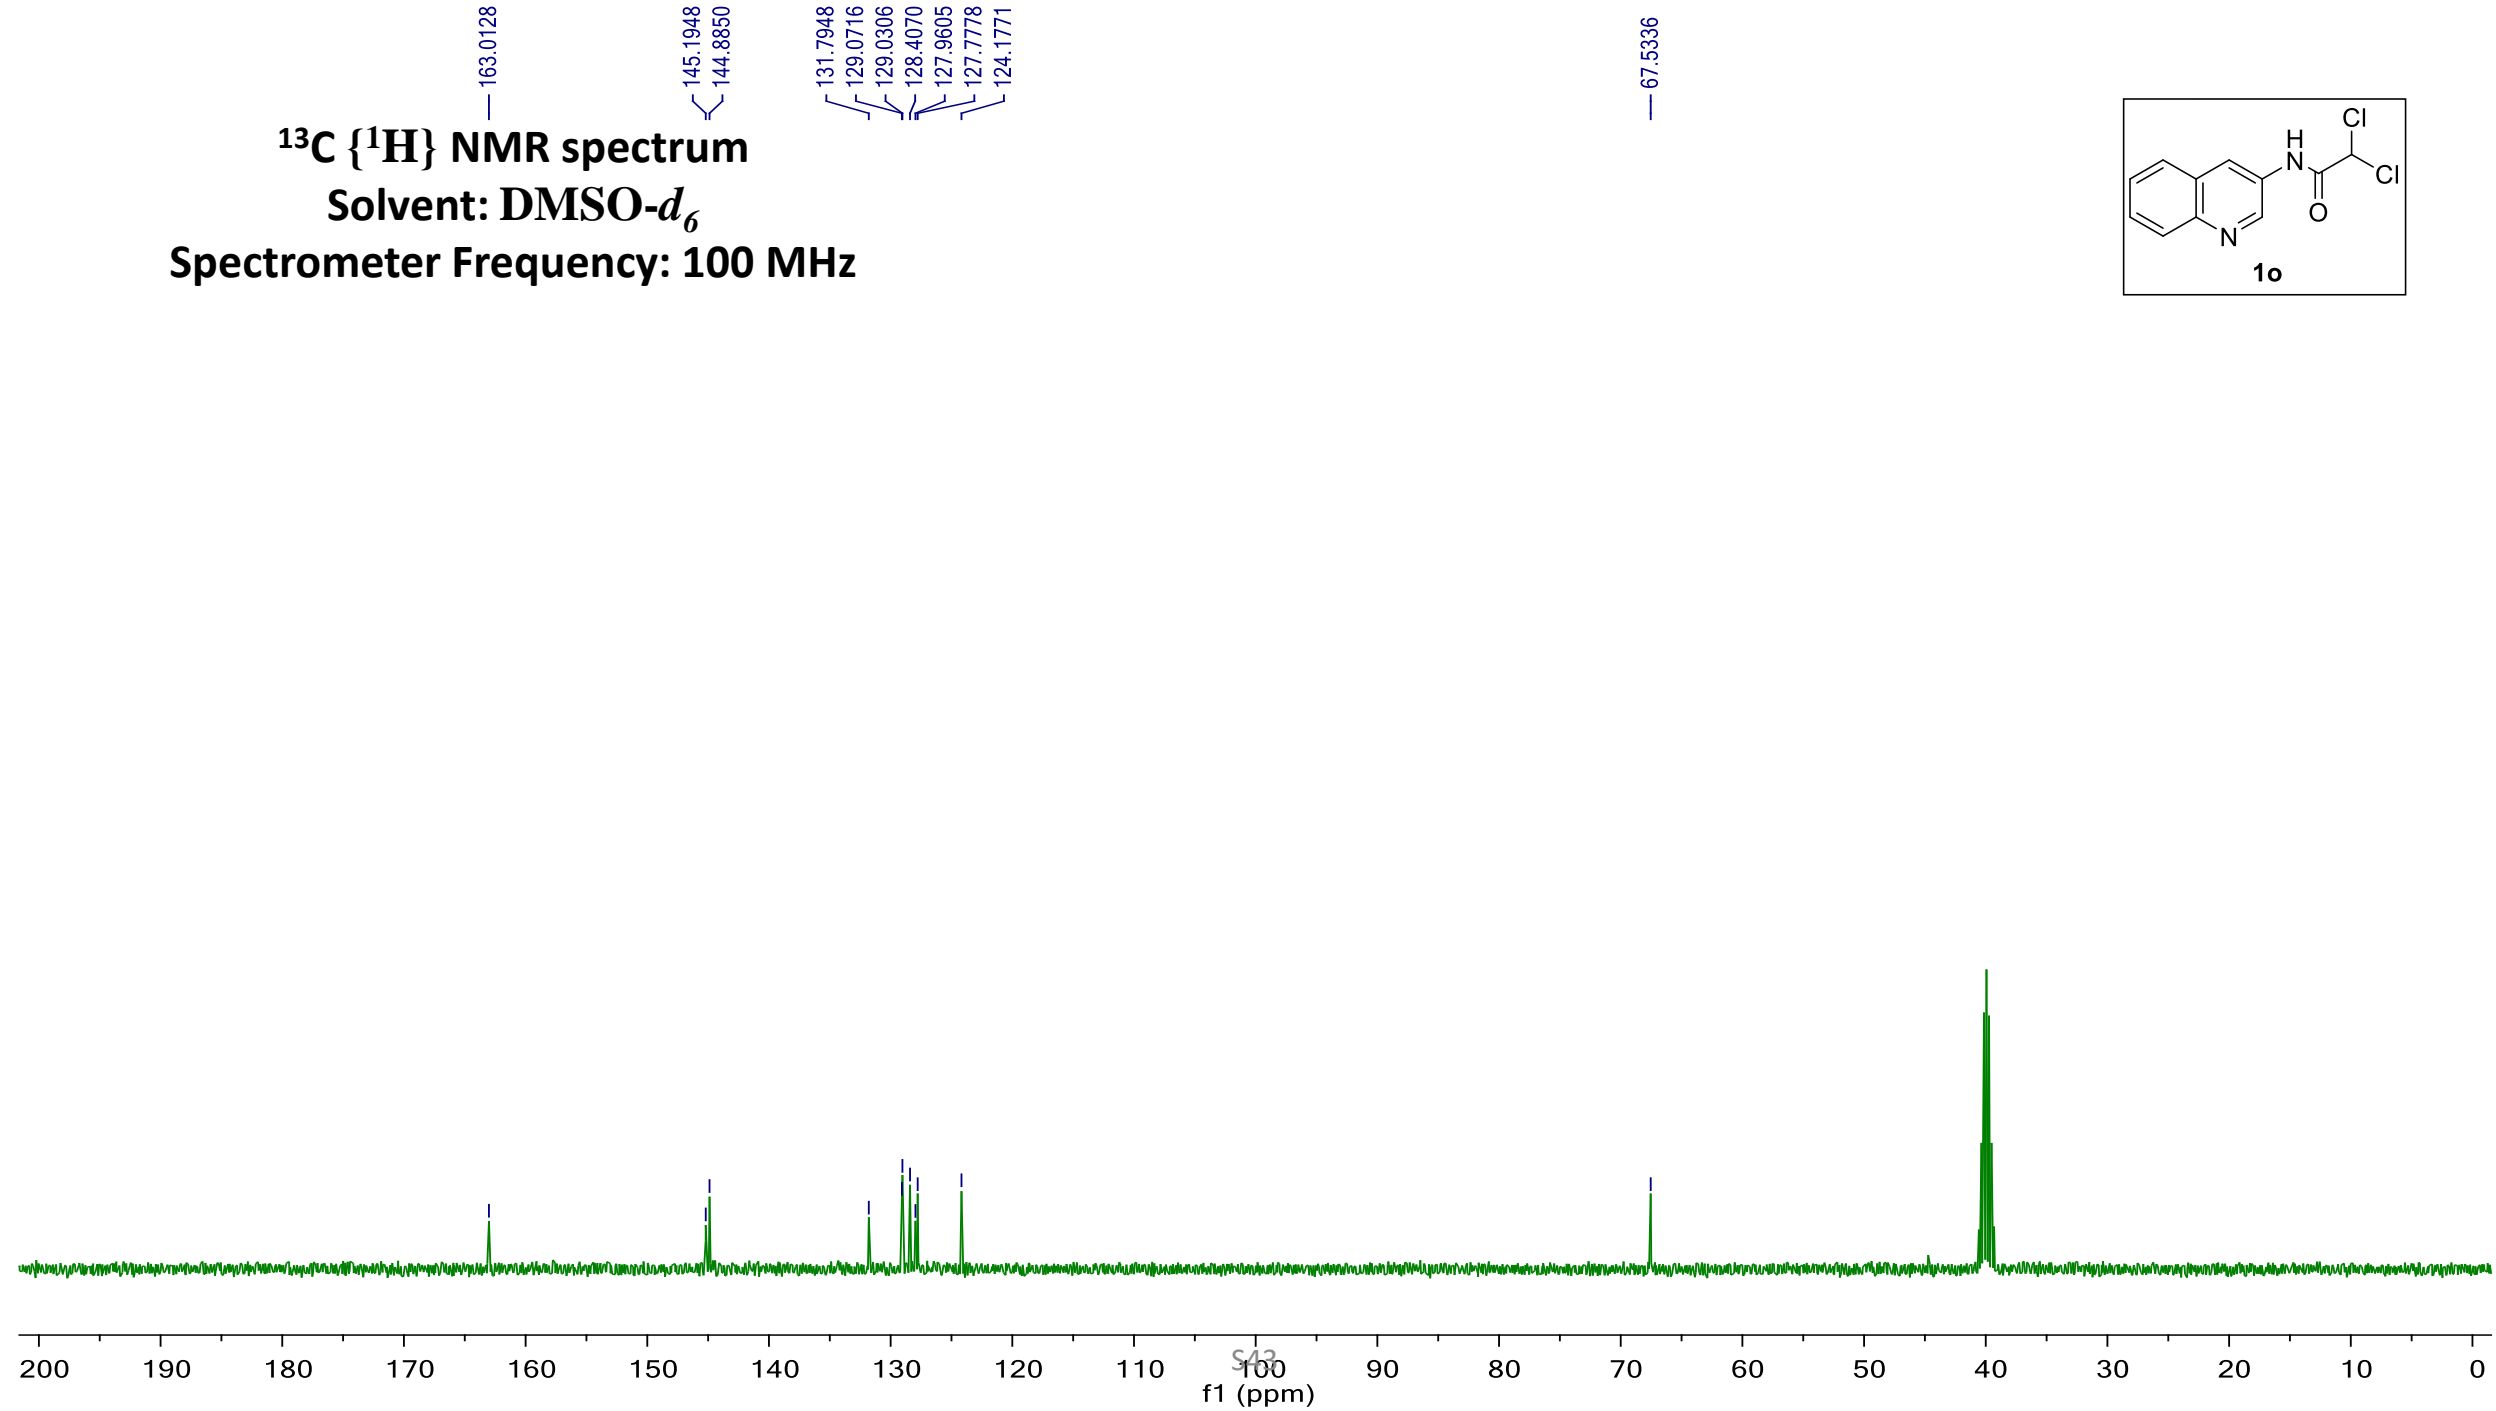

**$^1\text{H}$  NMR spectrum**  
**Solvent:  $\text{CDCl}_3$**   
**Spectrometer Frequency: 400 MHz**

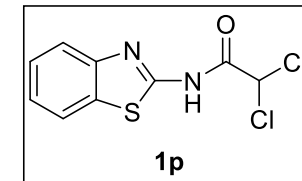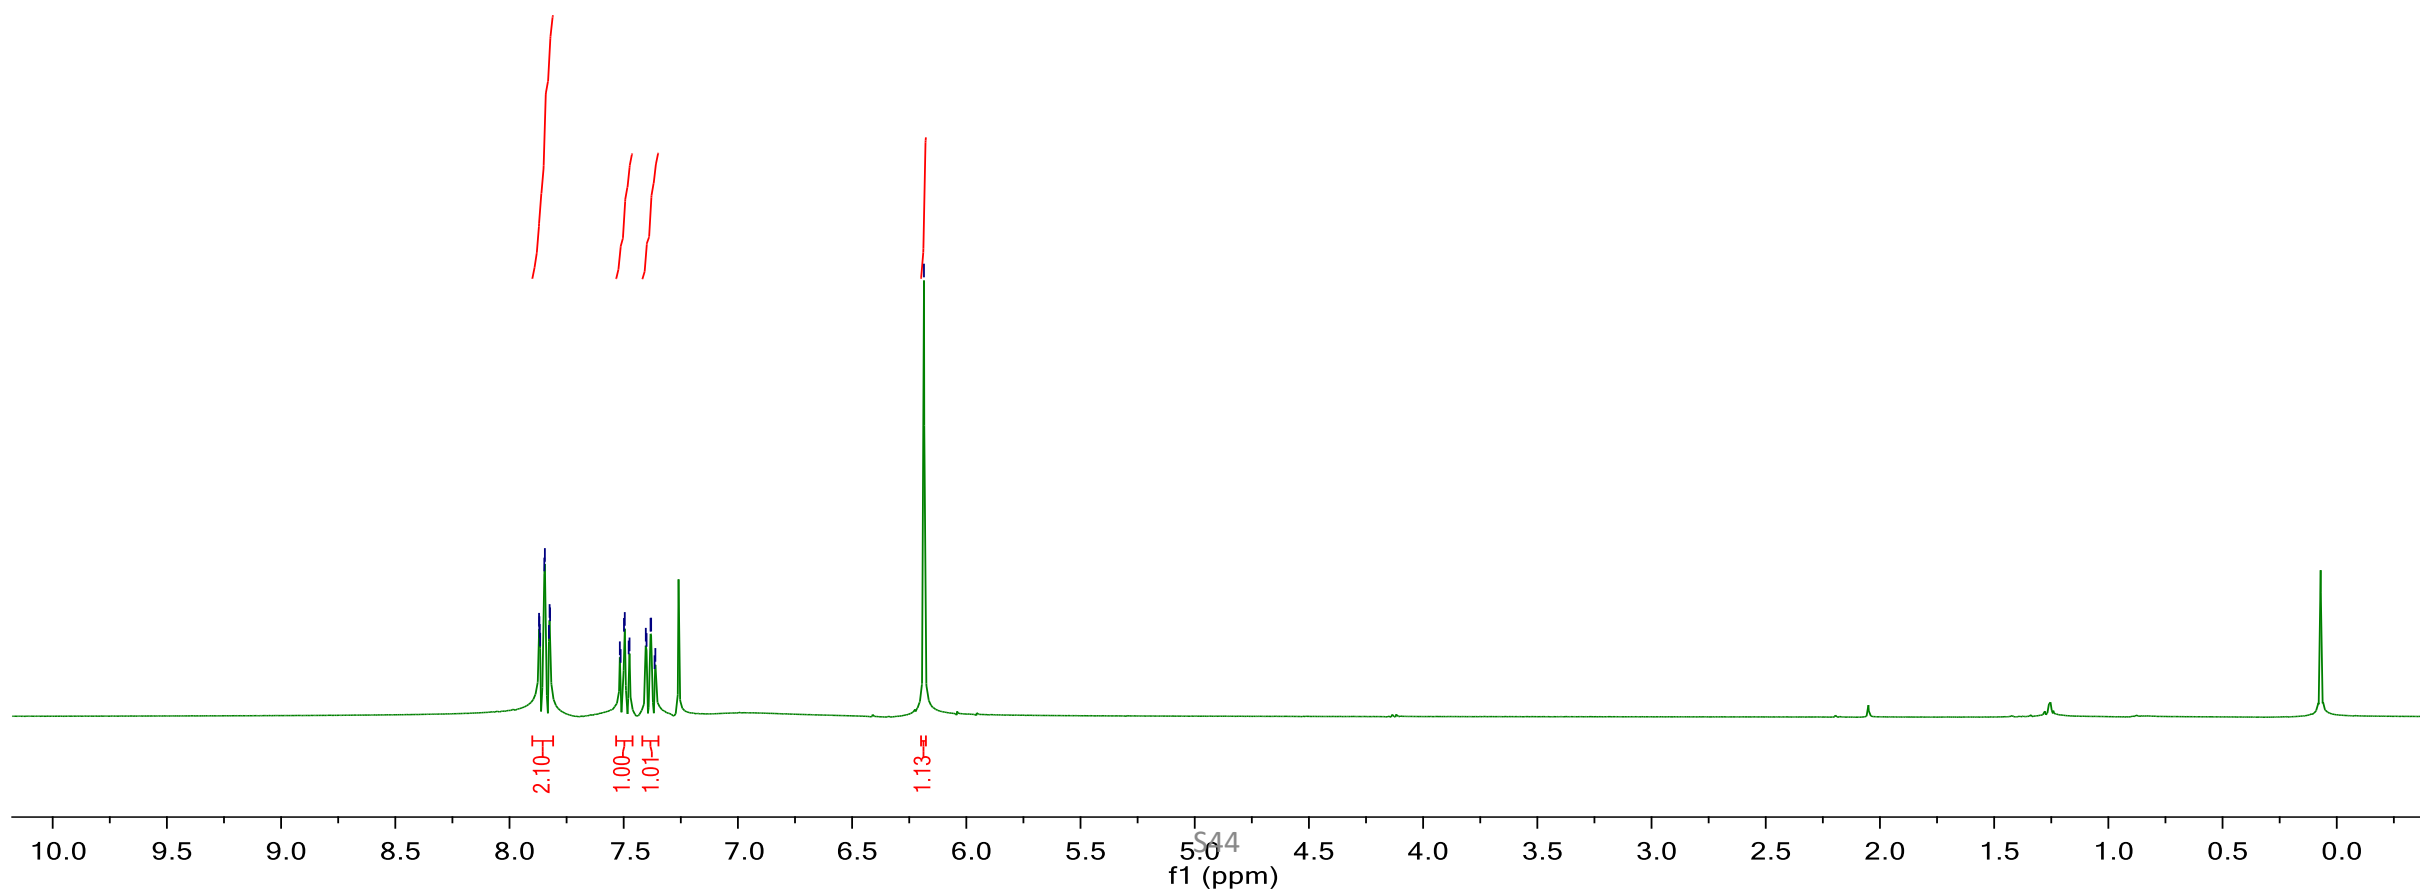

**$^{13}\text{C}$   $\{^1\text{H}\}$  NMR spectrum**  
**Solvent:  $\text{CDCl}_3$**   
**Spectrometer Frequency: 100 MHz**

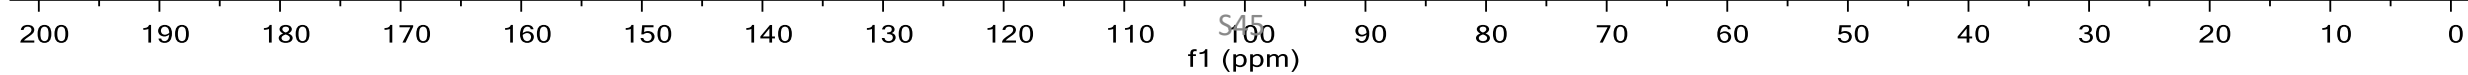

**$^1\text{H}$  NMR spectrum**  
**Solvent:  $\text{CDCl}_3$**   
**Spectrometer Frequency: 400 MHz**

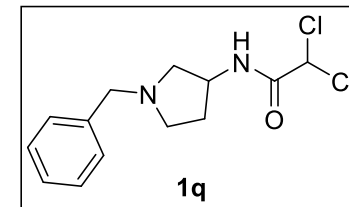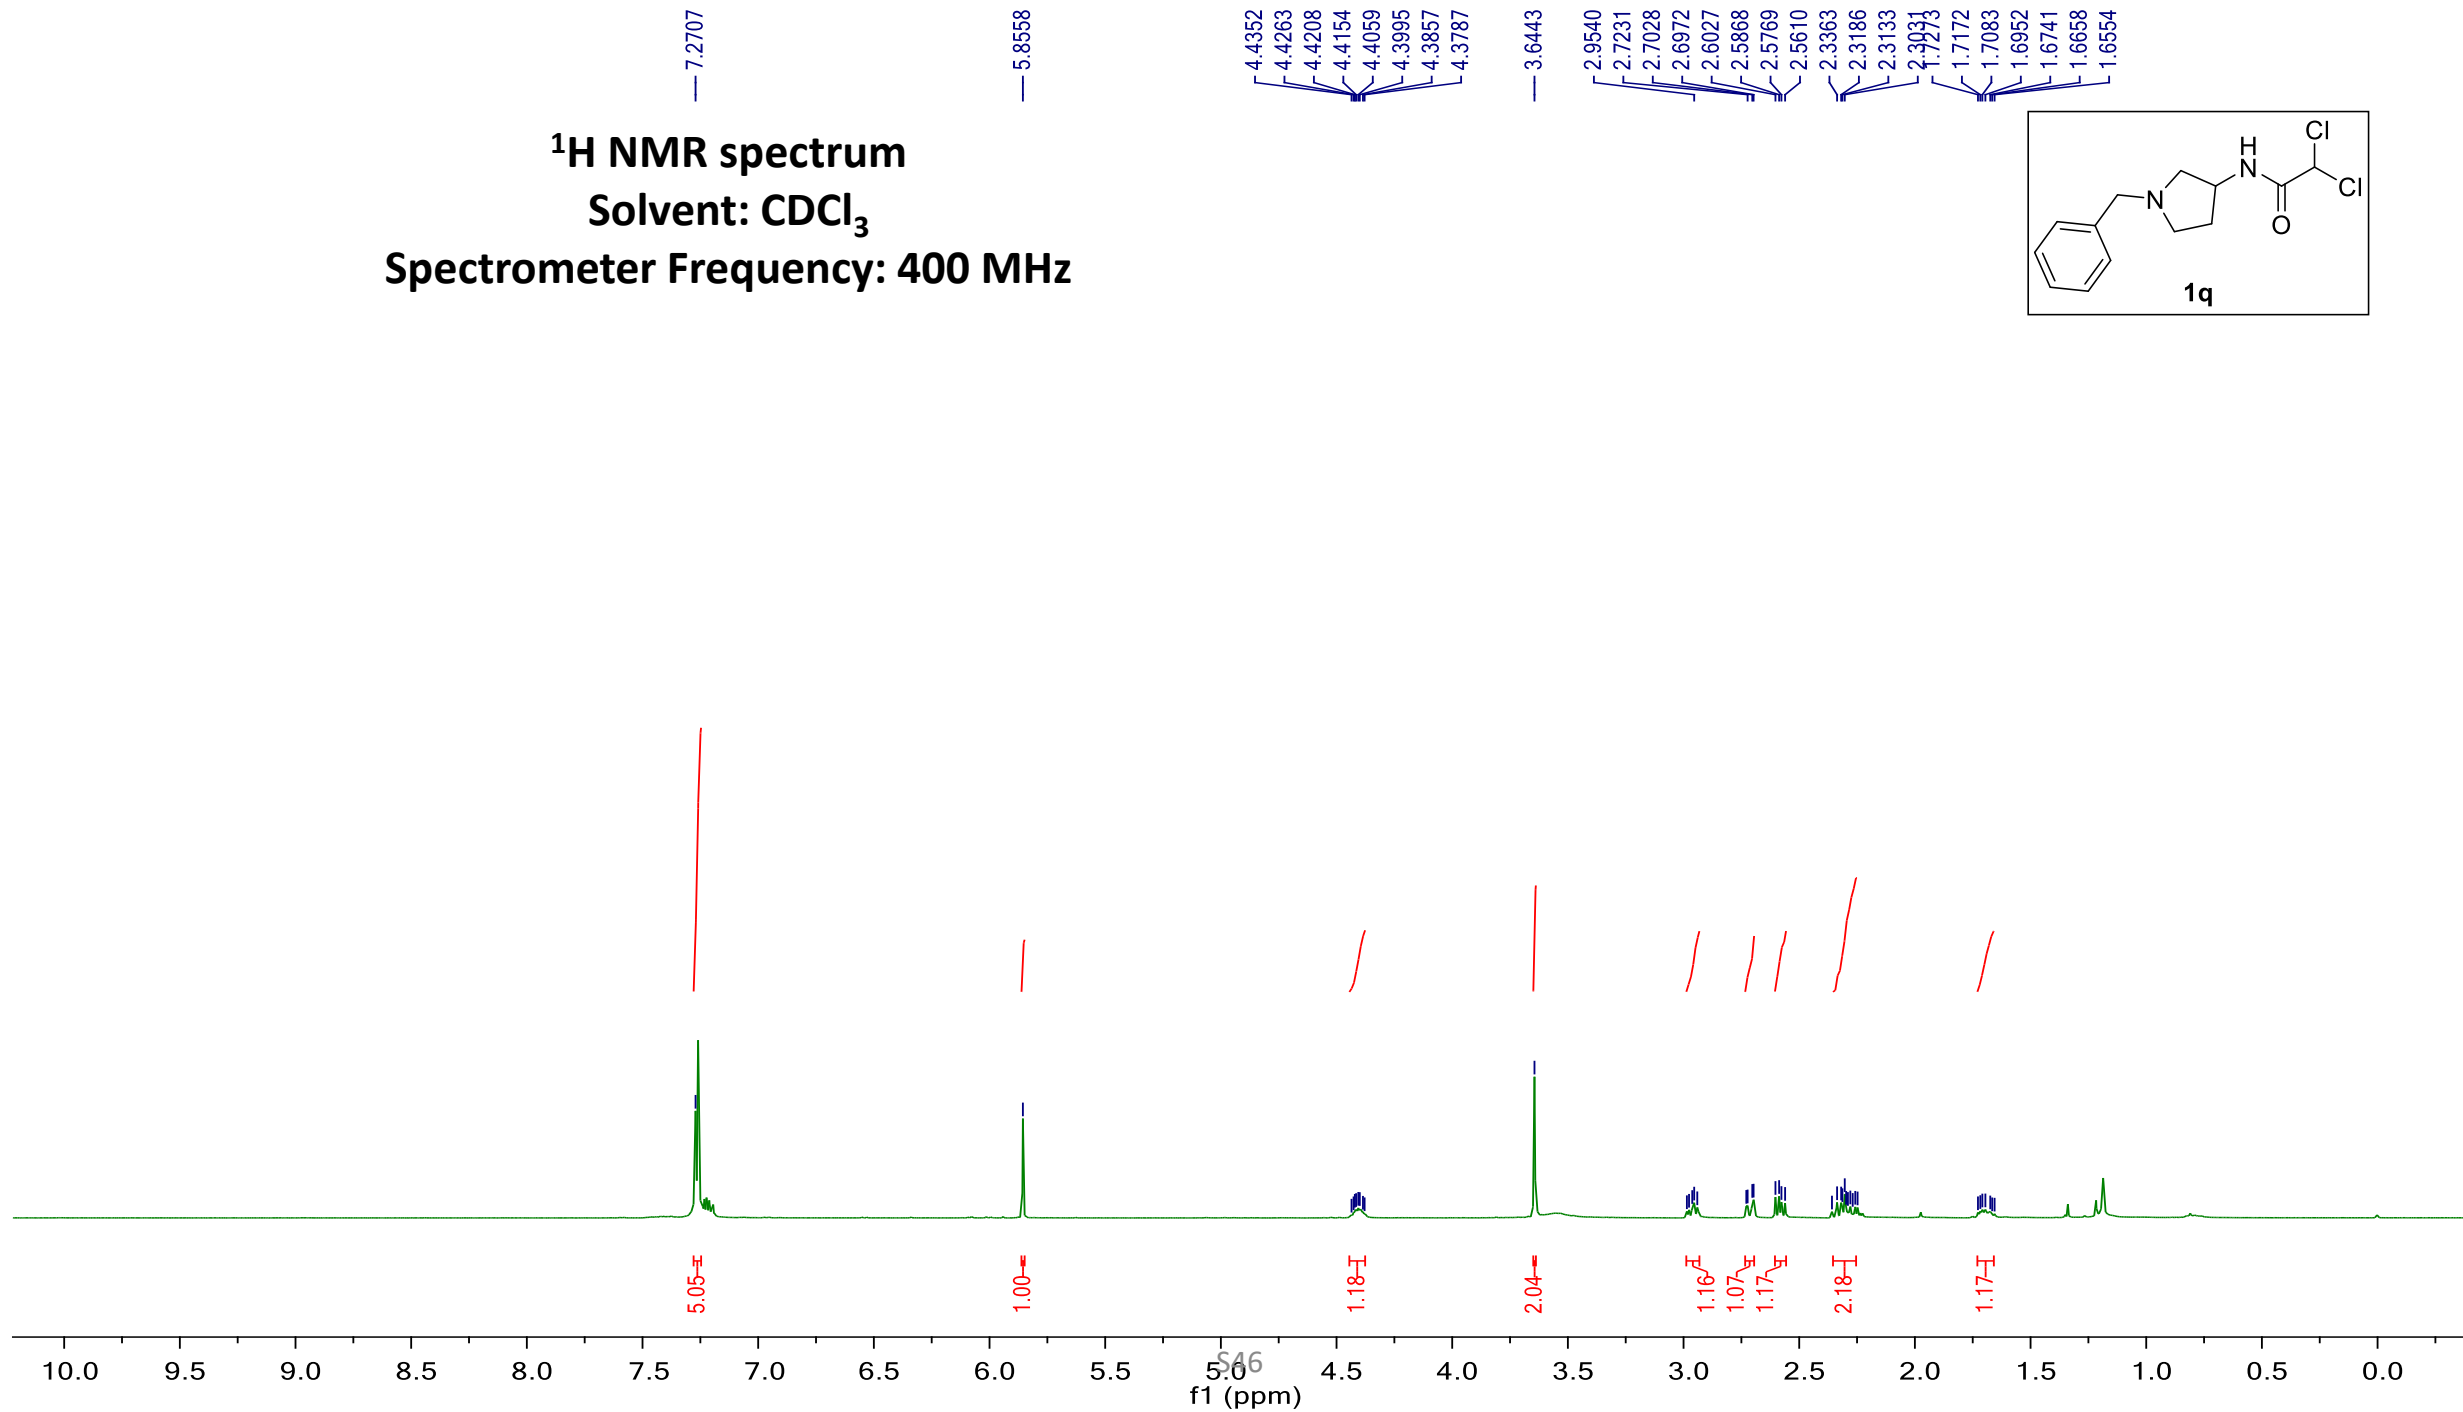

**$^{13}\text{C}$   $\{^1\text{H}\}$  NMR spectrum**  
**Solvent:  $\text{CDCl}_3$**   
**Spectrometer Frequency: 100 MHz**

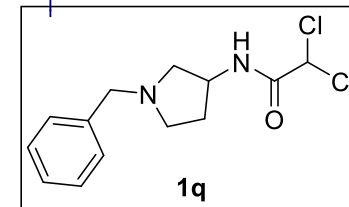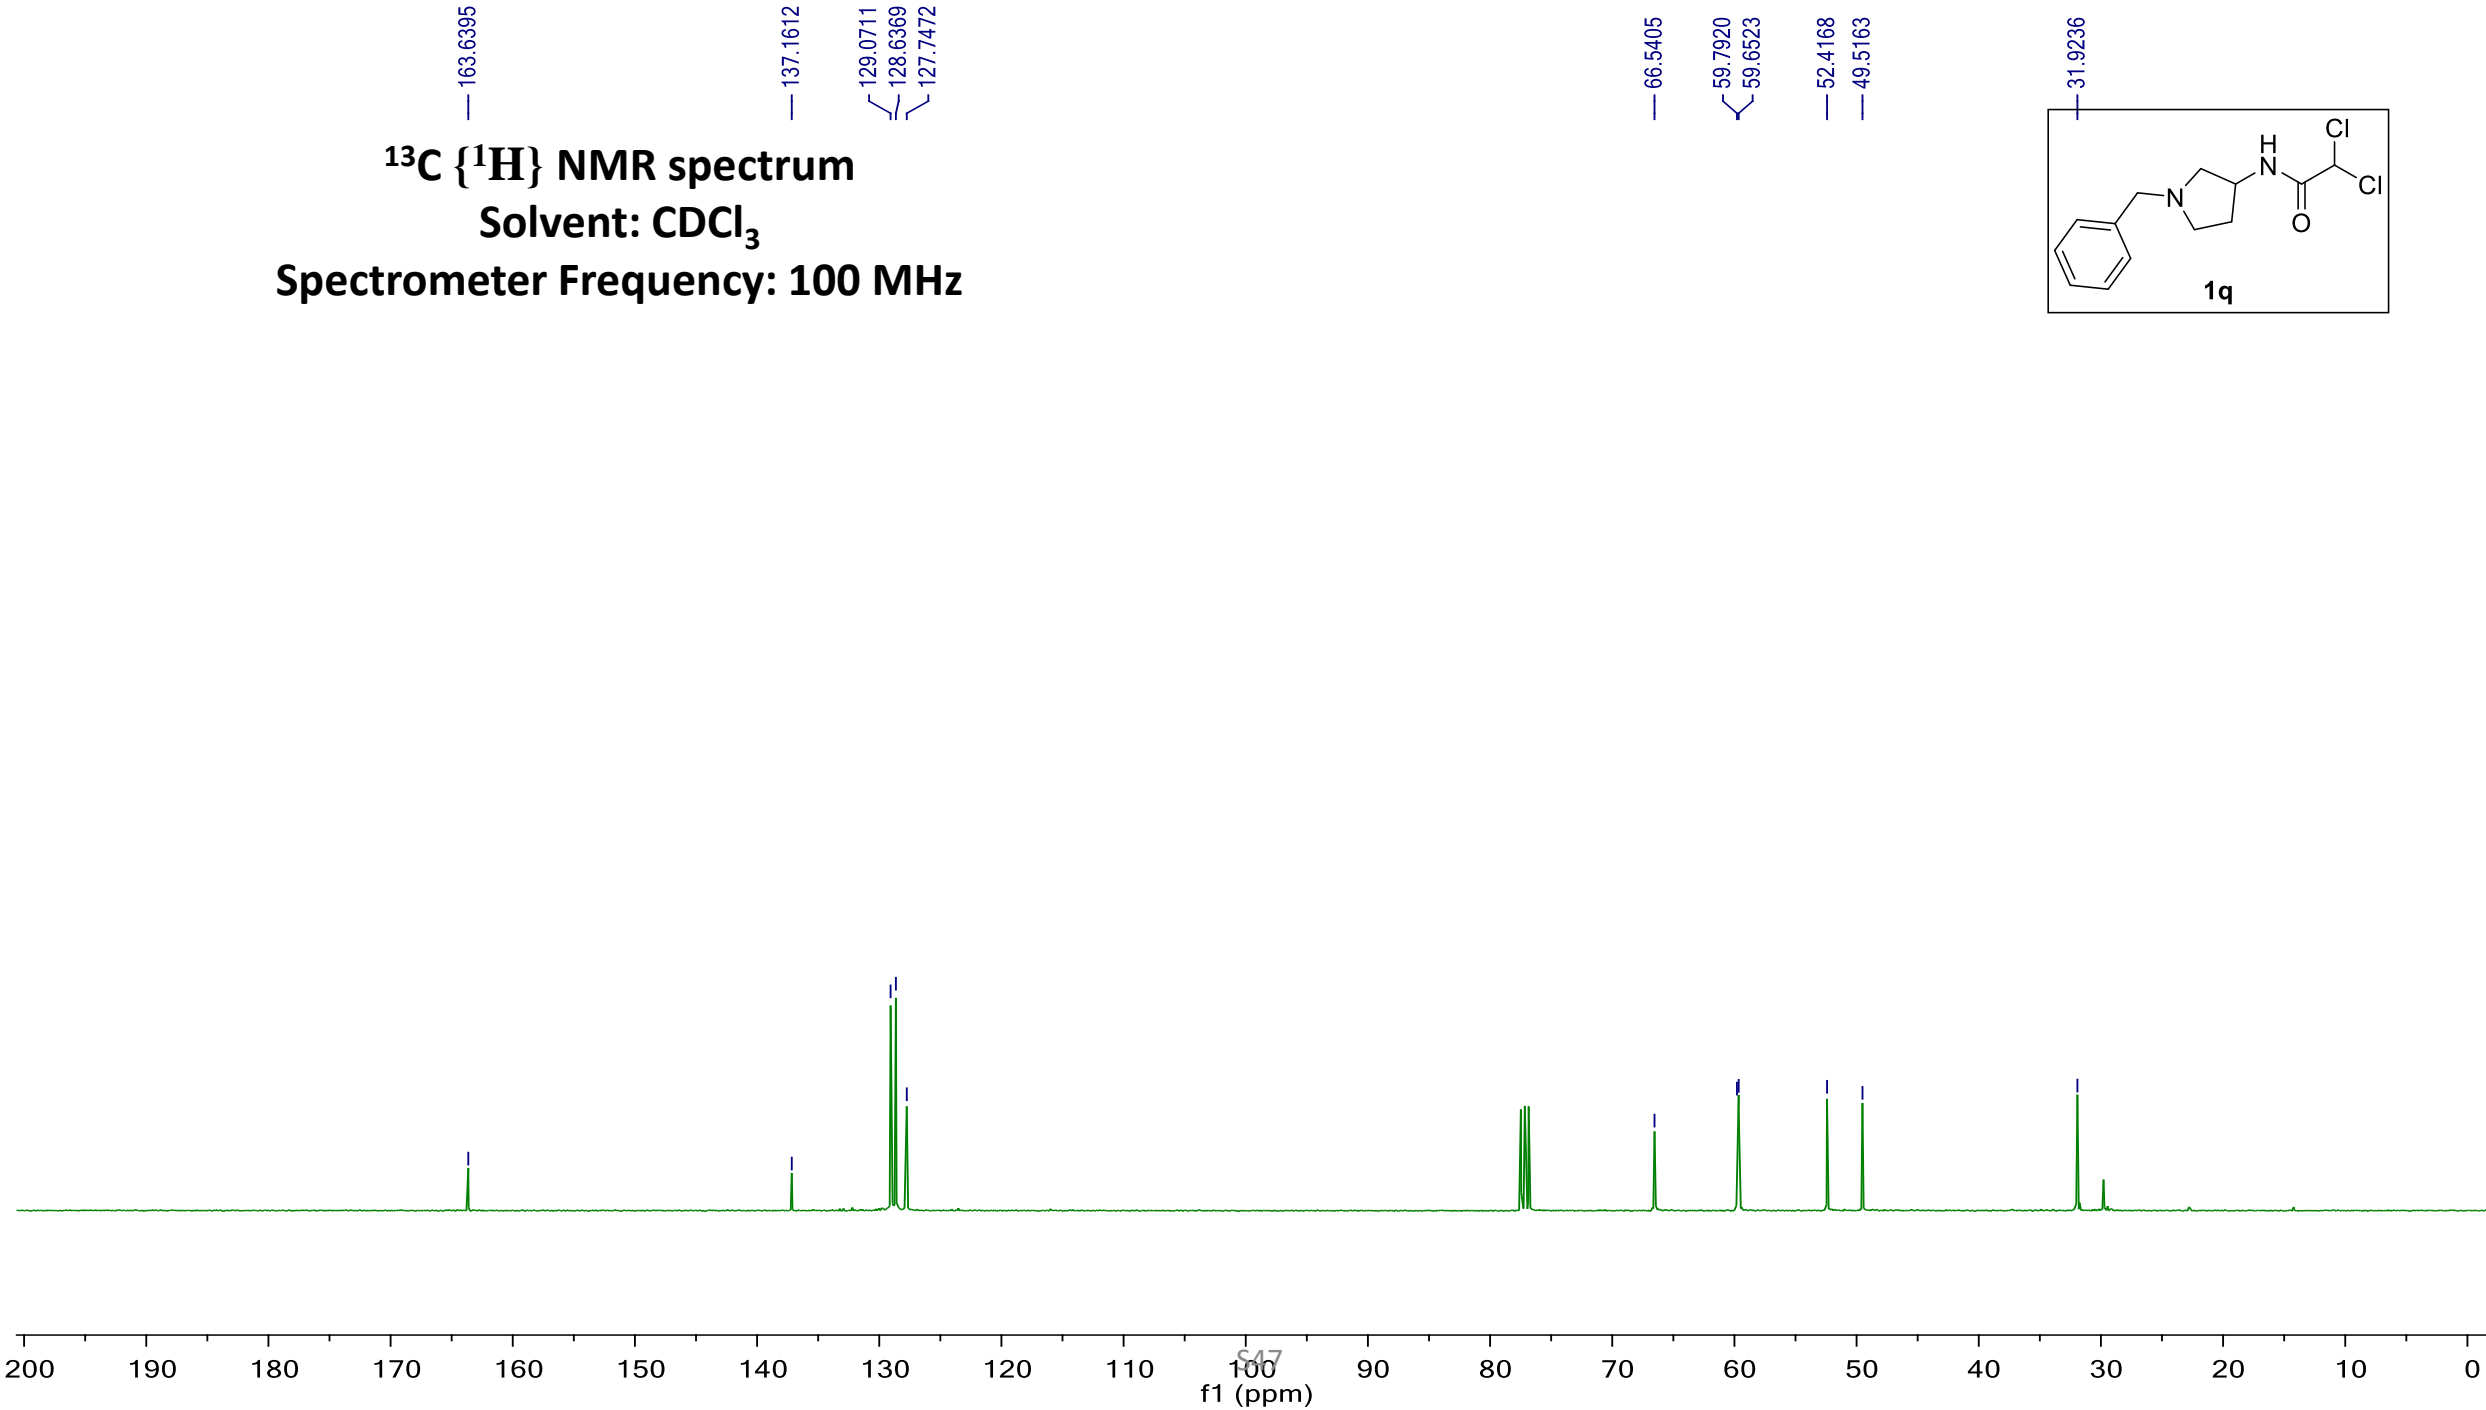

**$^1\text{H}$  NMR spectrum**  
**Solvent:  $\text{DMSO-}d_6$**   
**Spectrometer Frequency: 400 MHz**

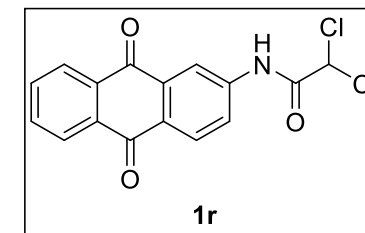

10.2832  
8.8998  
8.1681  
8.1624  
8.1604  
8.1552  
8.1375  
7.9010  
7.8965  
7.8877  
7.8785  
7.8746  
7.6488  
7.6393

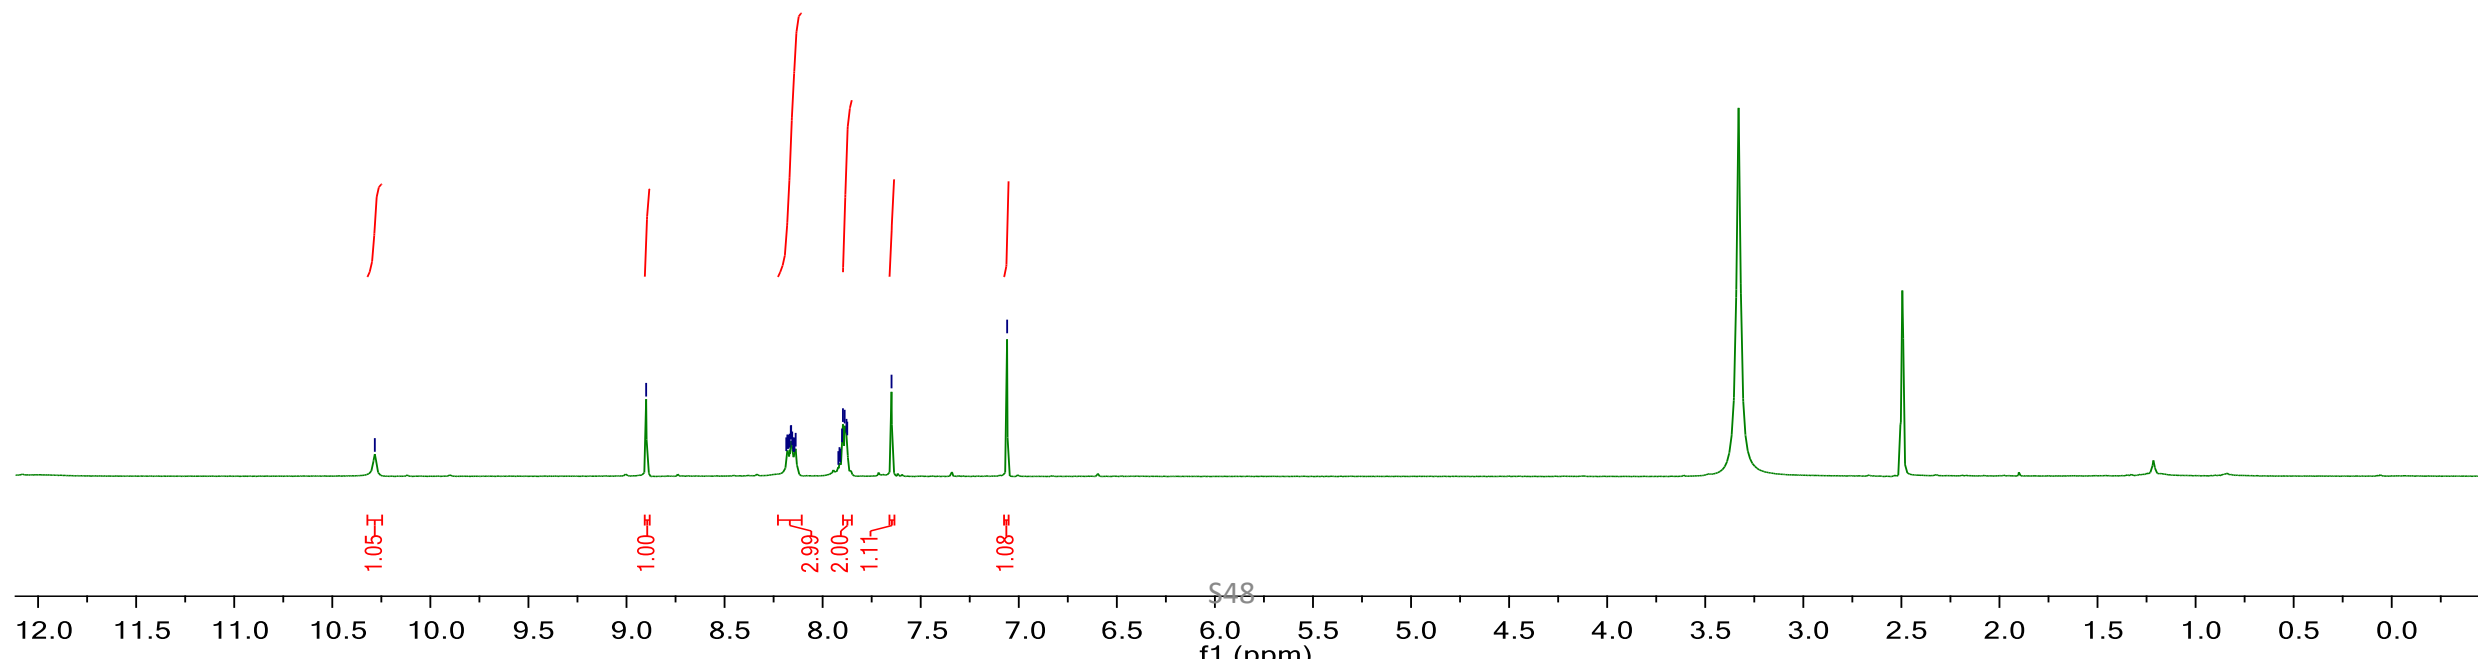

**$^{13}\text{C}$  { $^1\text{H}$ } NMR spectrum**  
**Solvent: DMSO- $d_6$**   
**Spectrometer Frequency: 100 MHz**

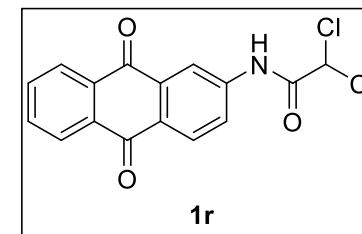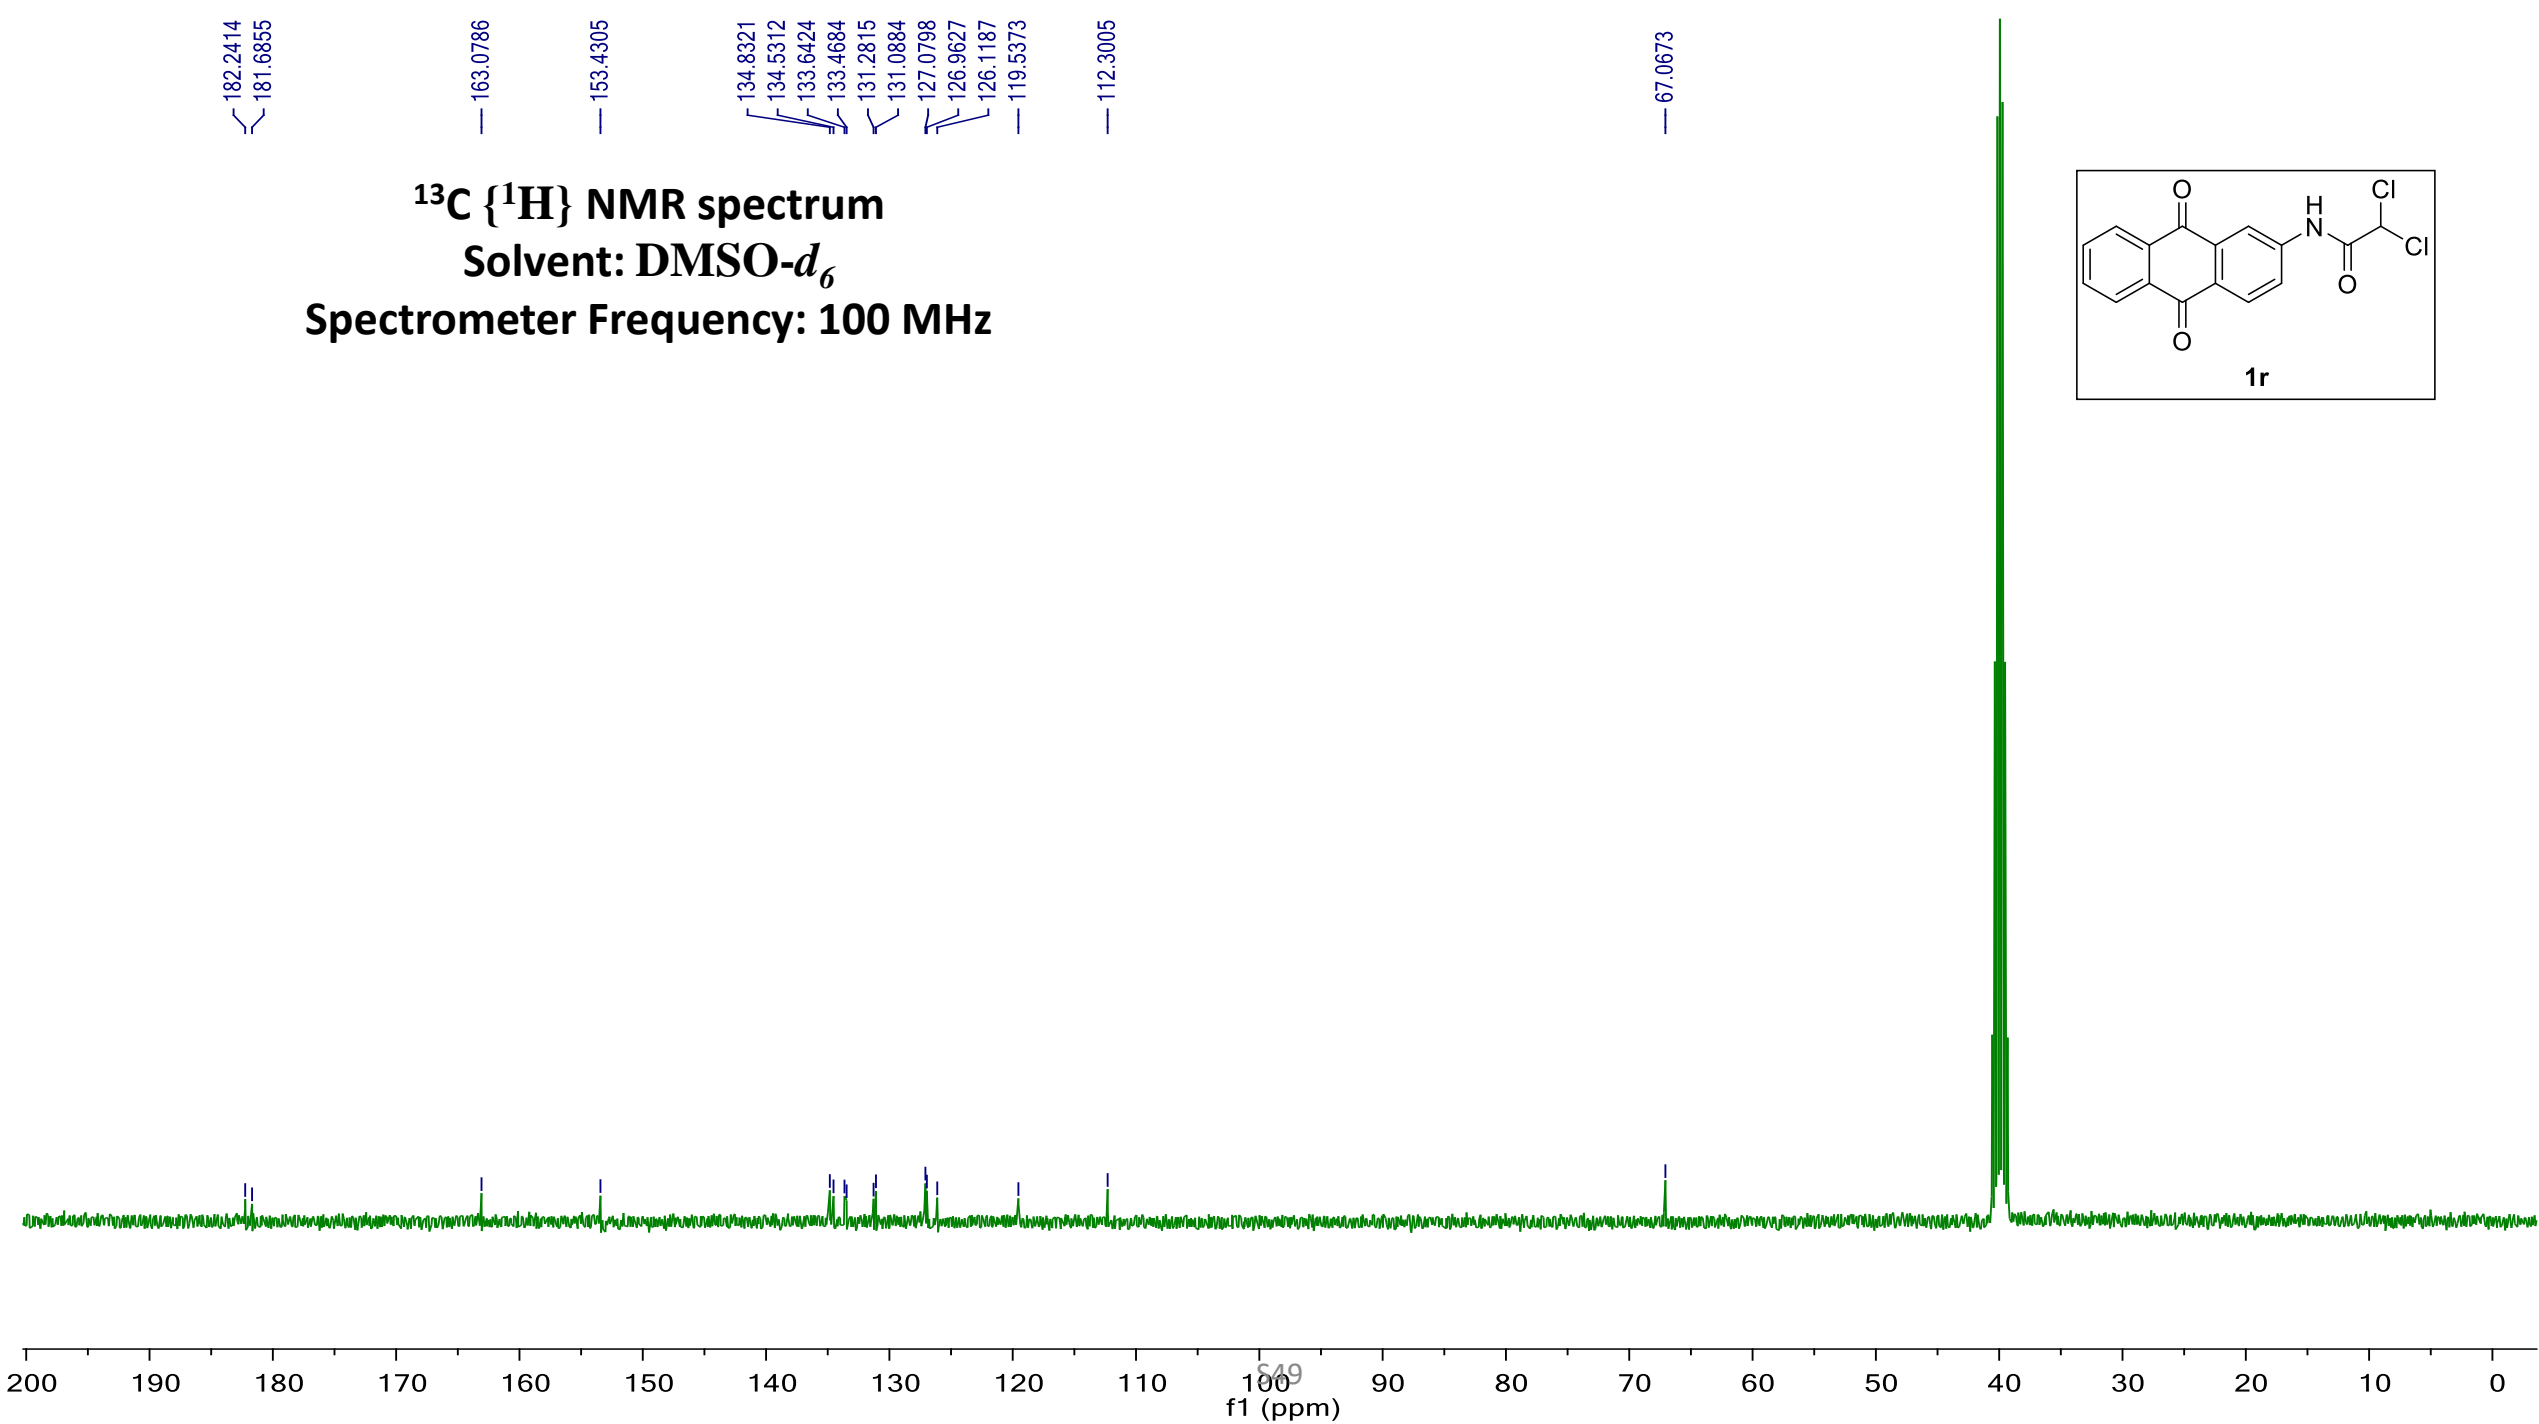

**$^1\text{H}$  NMR spectrum**  
**Solvent:  $\text{CDCl}_3$**   
**Spectrometer Frequency: 400 MHz**

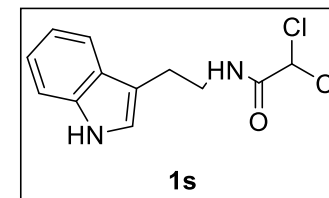

8.4412  
7.7993  
7.7796  
7.5624  
7.5422  
7.4224  
7.4045  
7.3422  
7.3246  
7.3227  
7.2013  
7.1968  
6.8618

6.0358

3.8346  
3.8181  
3.8021  
3.7866

3.2206  
3.2039  
3.1871

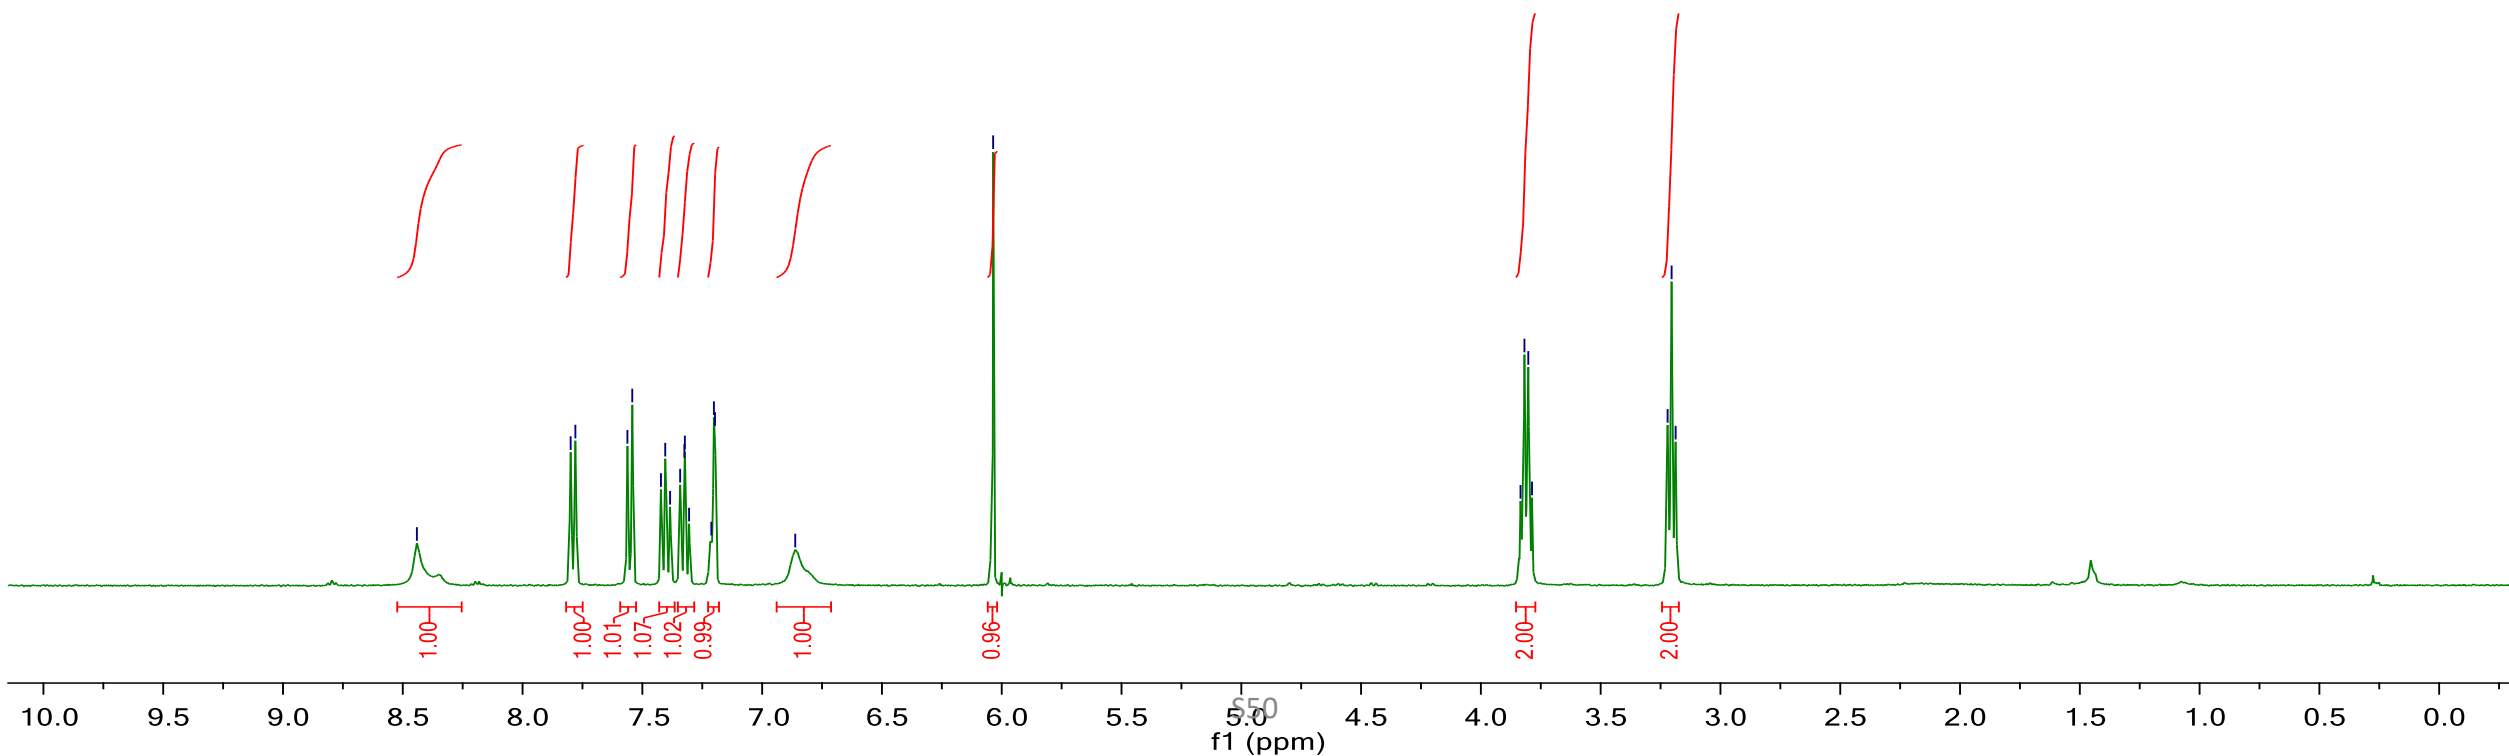

**$^{13}\text{C}$  { $^1\text{H}$ } NMR spectrum**  
**Solvent:  $\text{CDCl}_3$**   
**Spectrometer Frequency: 100 MHz**

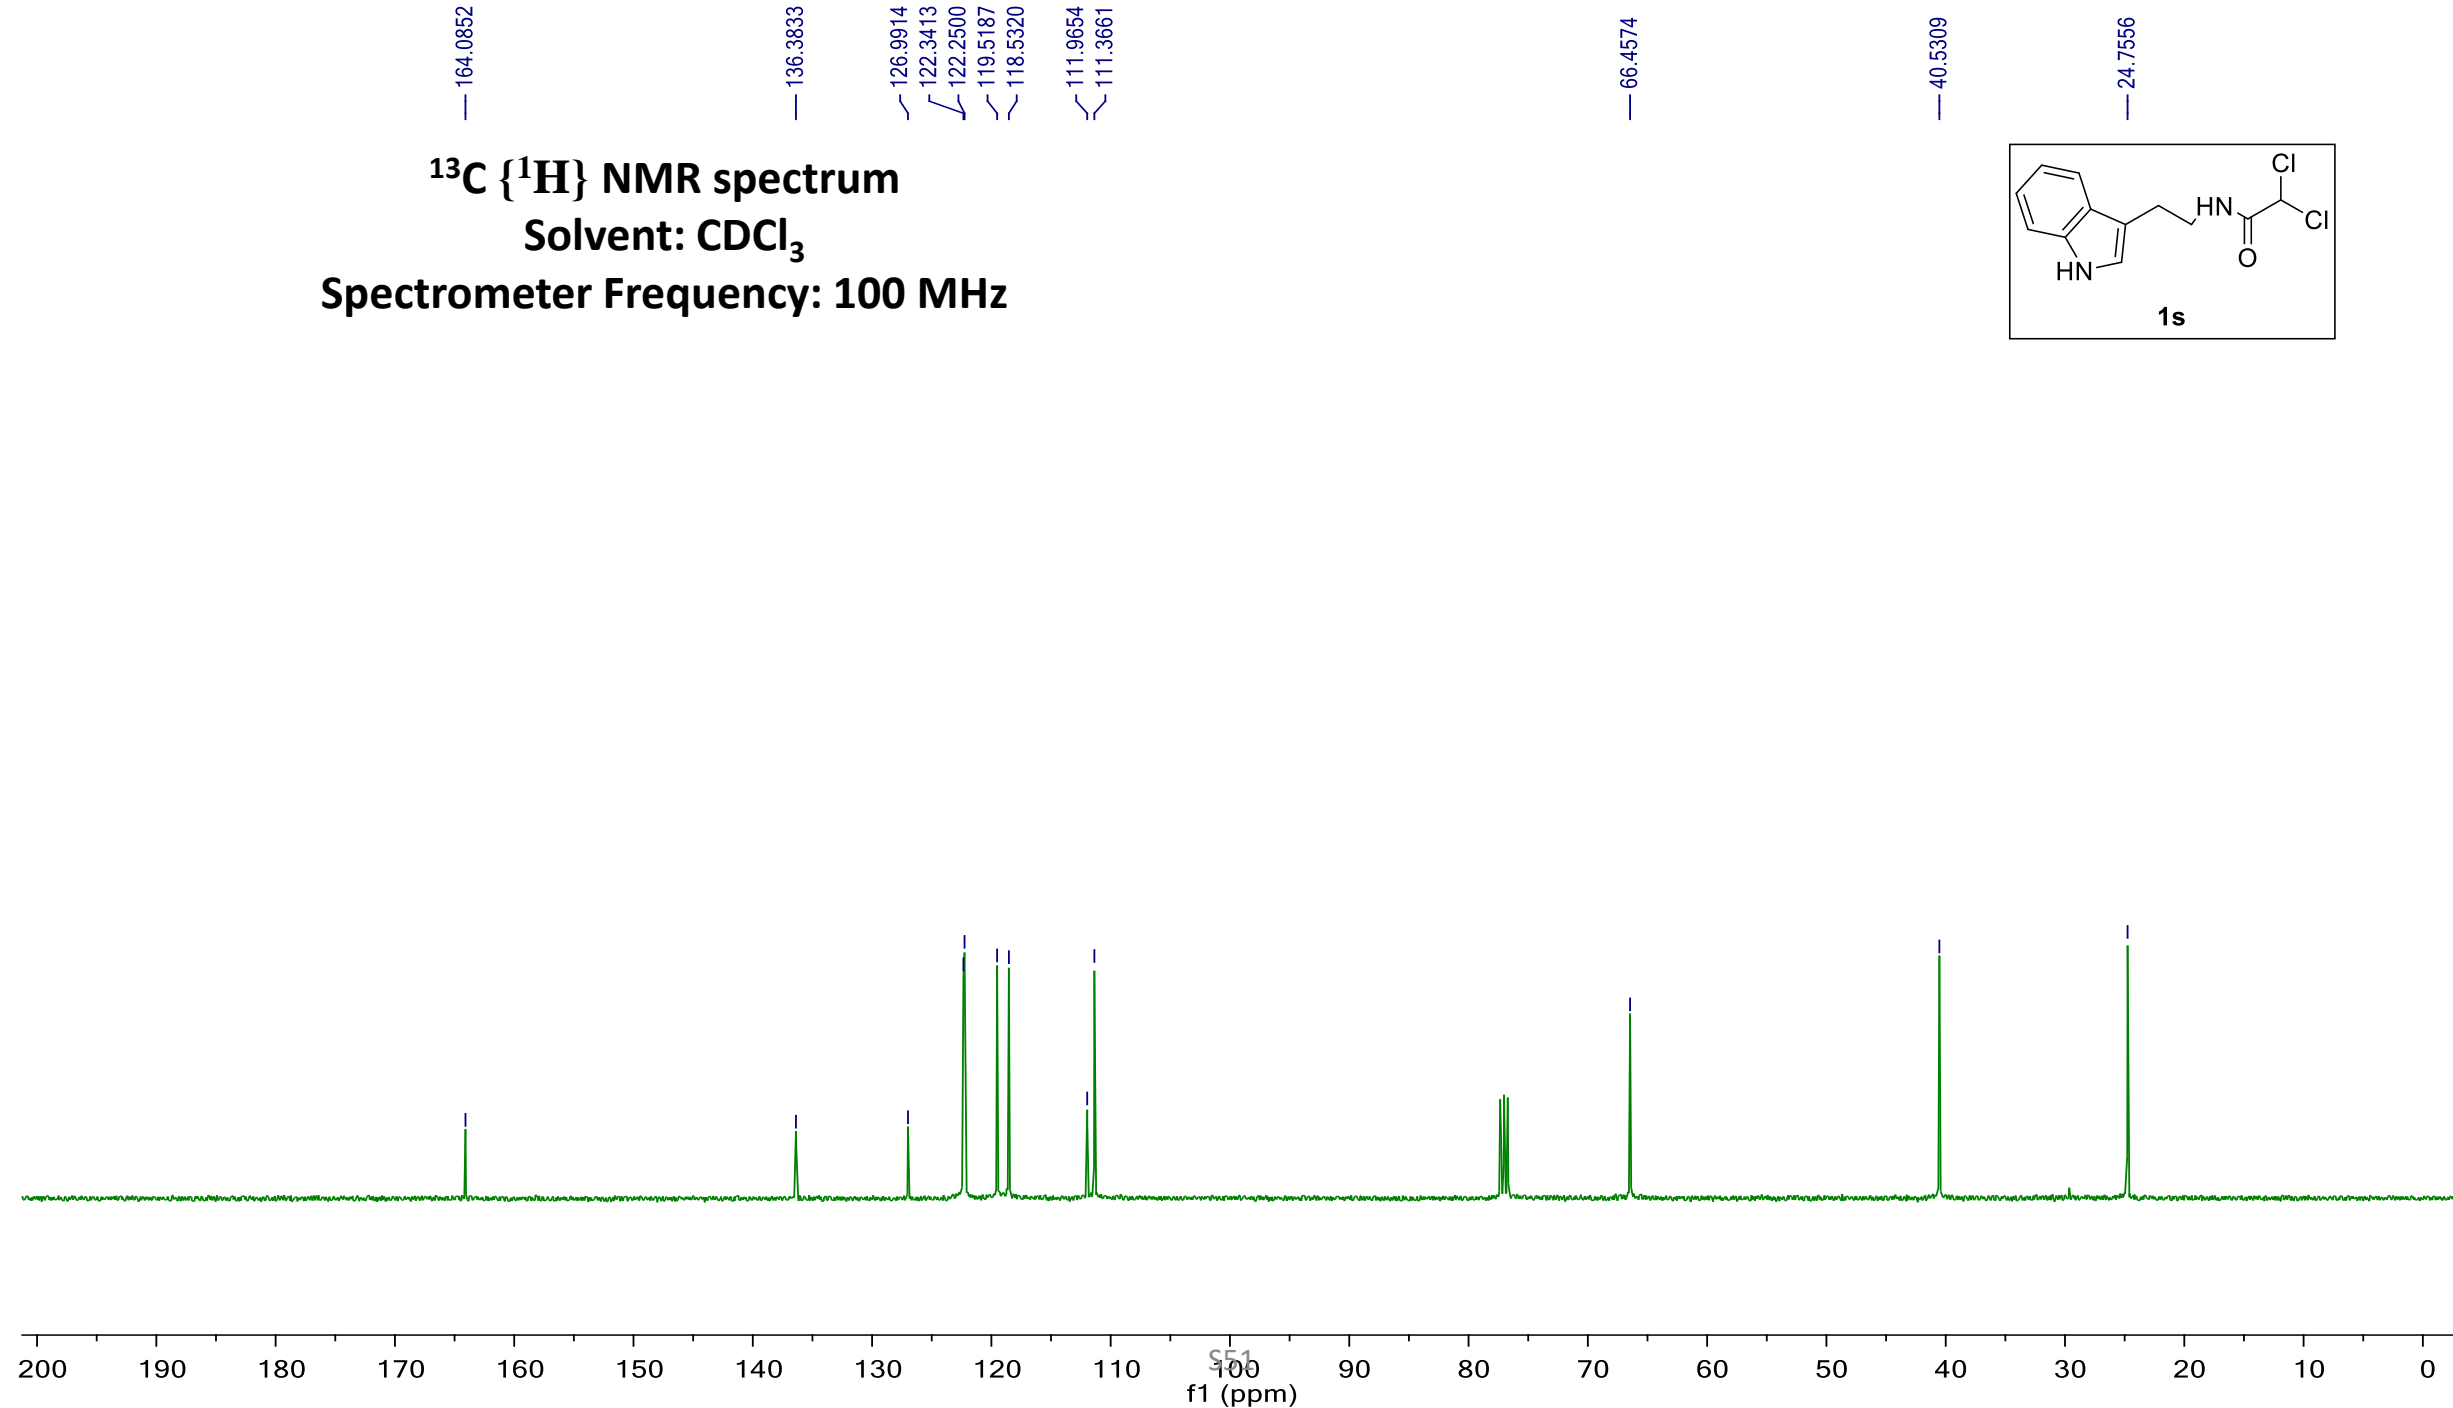

**$^1\text{H}$  NMR spectrum**  
**Solvent:  $\text{CDCl}_3$**   
**Spectrometer Frequency: 400 MHz**

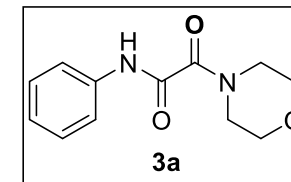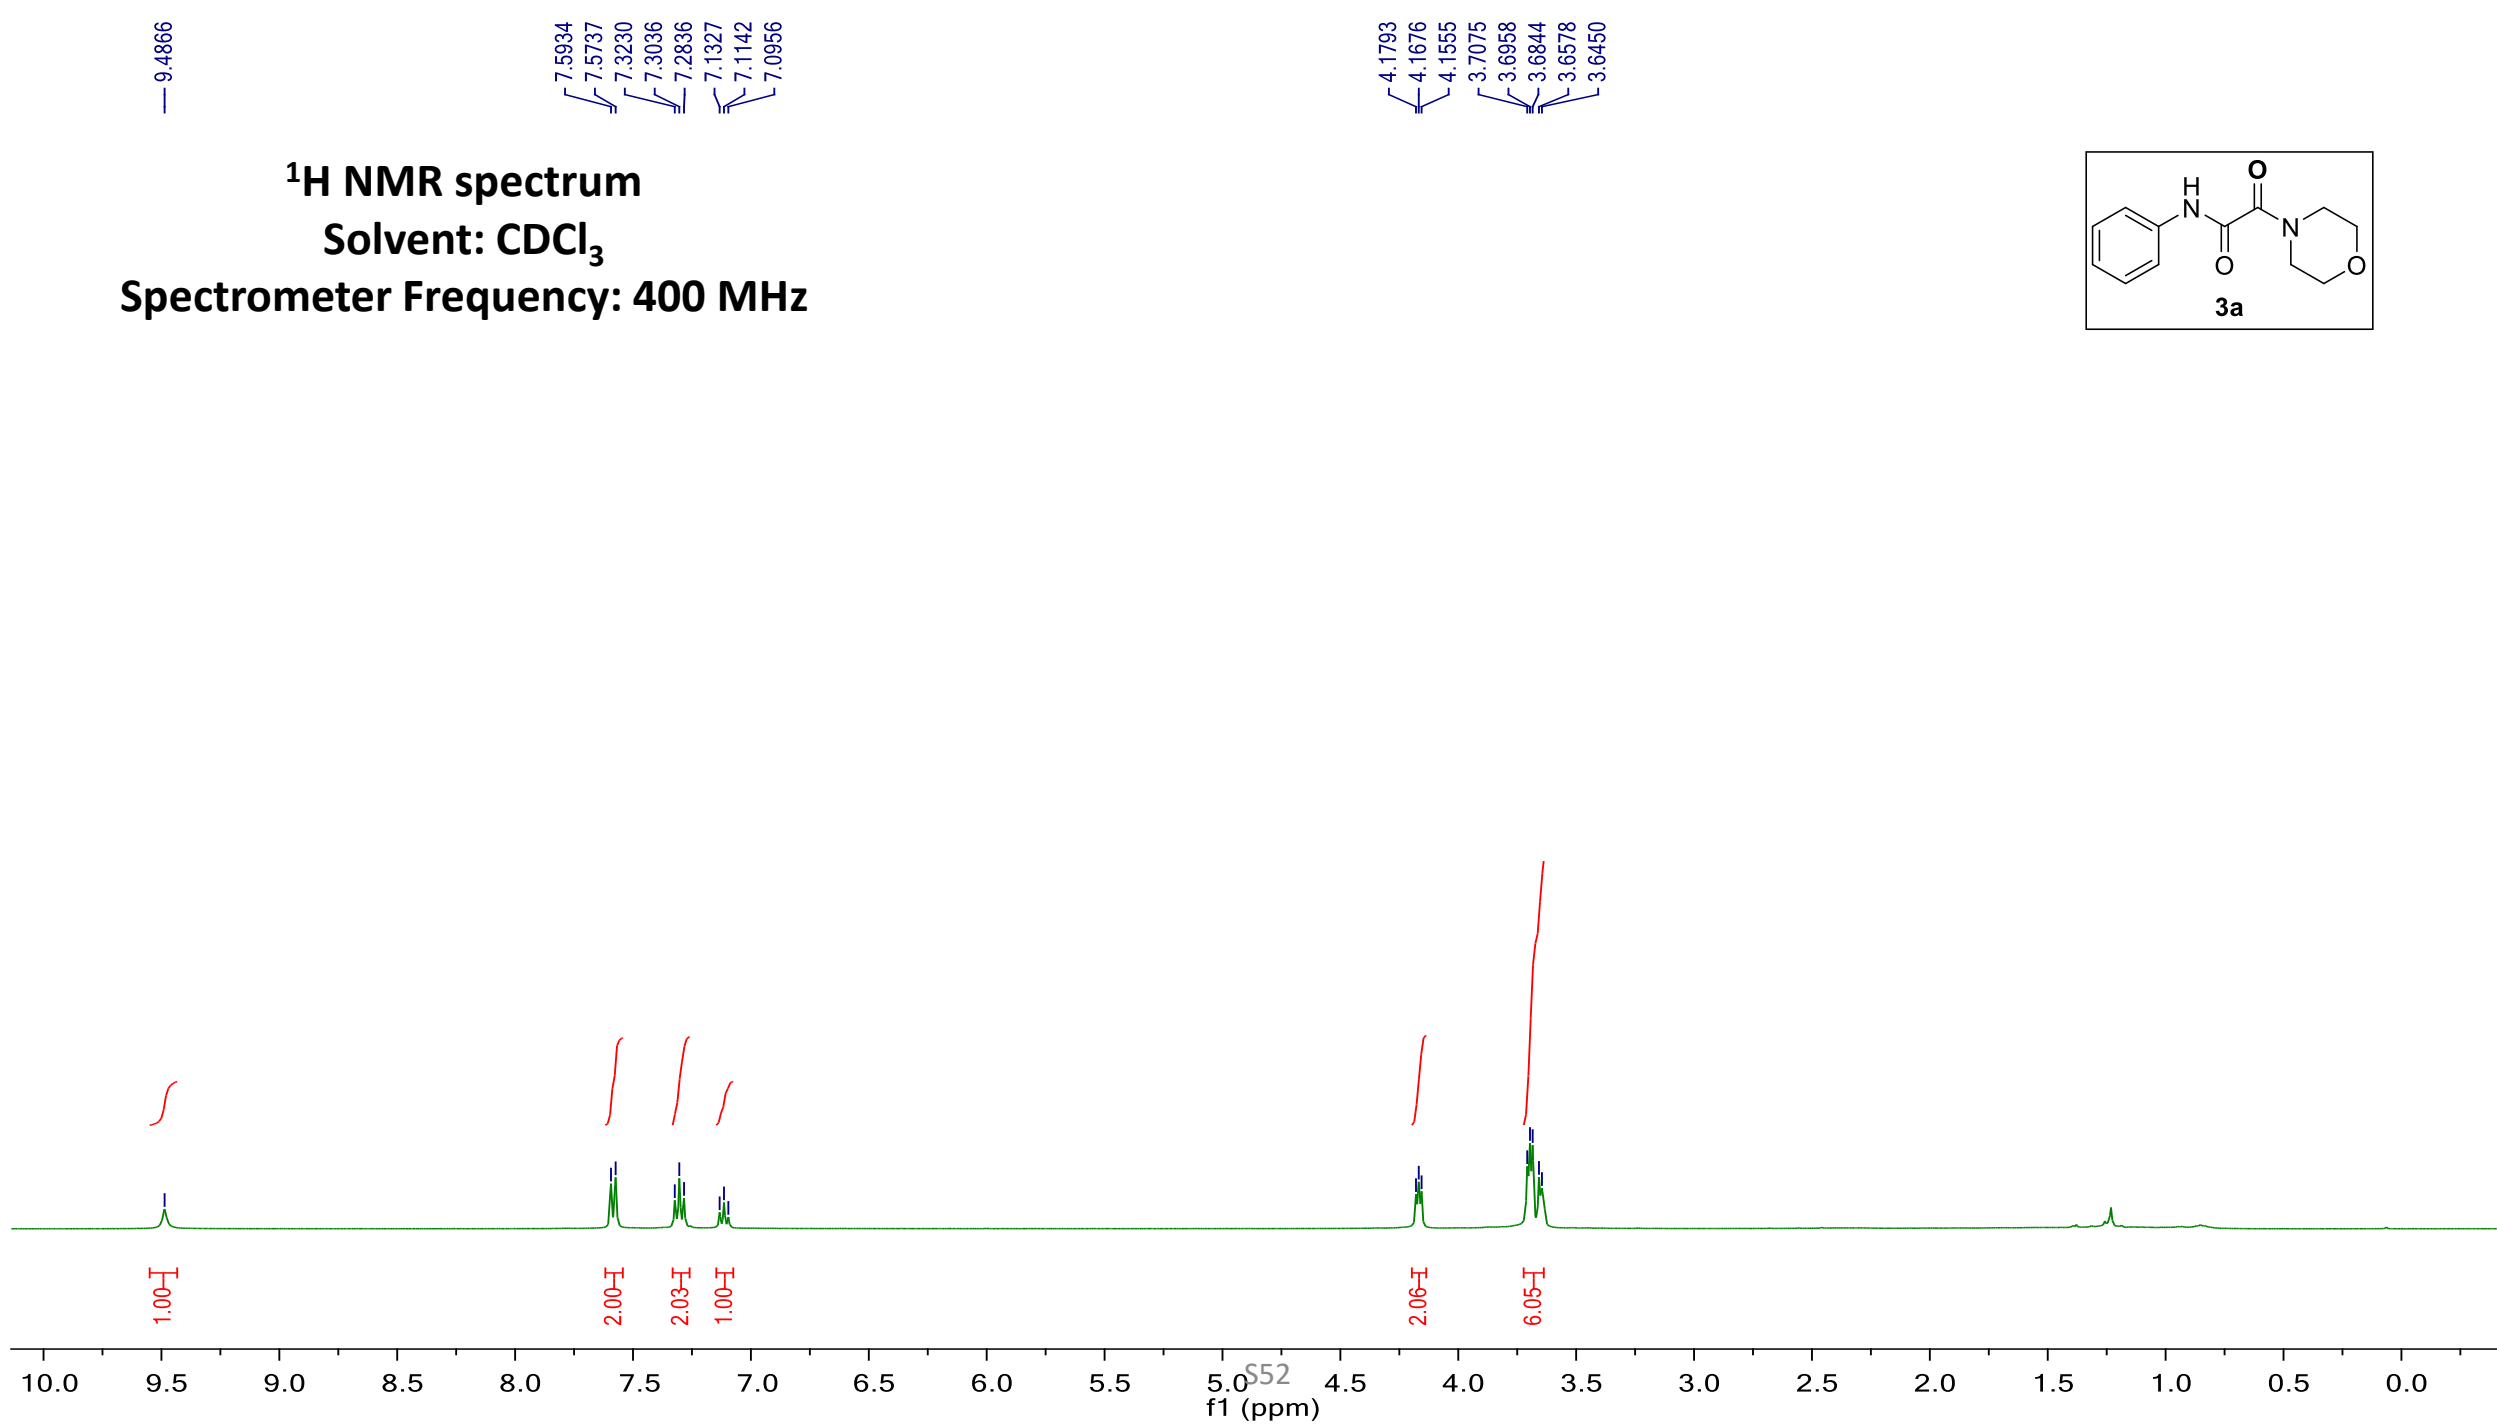

**$^{13}\text{C}$   $\{^1\text{H}\}$  NMR spectrum**  
**Solvent:  $\text{CDCl}_3$**   
**Spectrometer Frequency: 100 MHz**

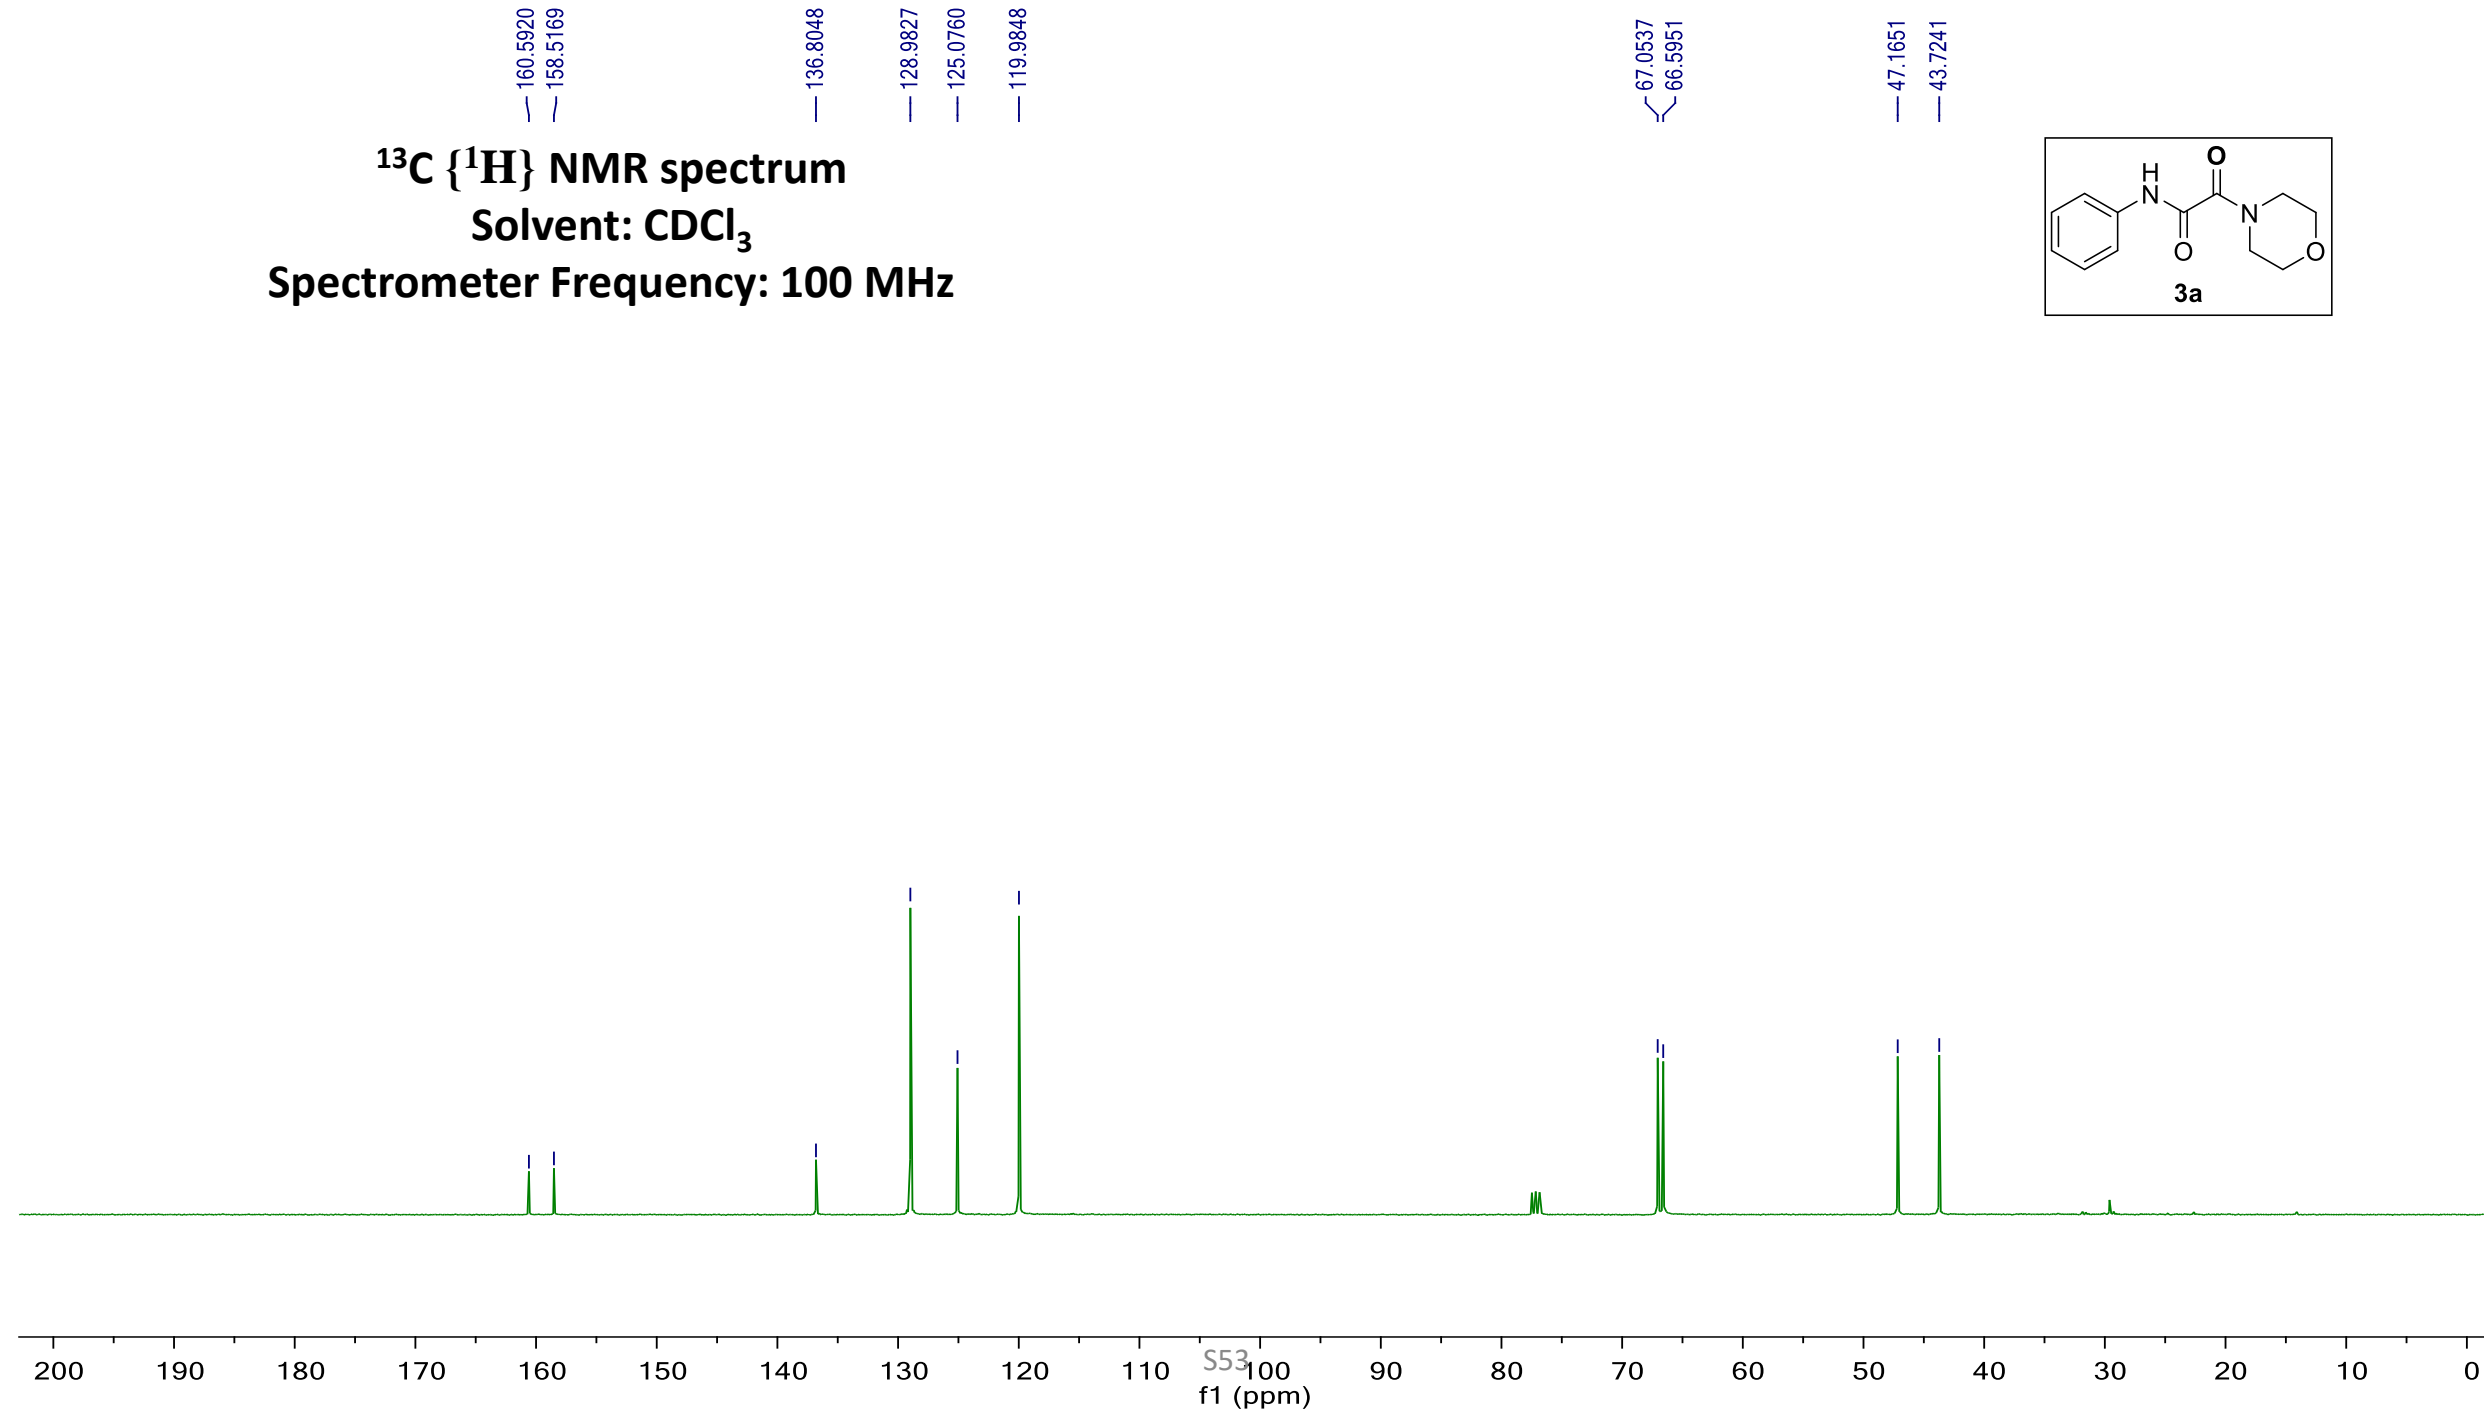

**<sup>1</sup>H NMR spectrum**  
**Solvent: CDCl<sub>3</sub>**  
**Spectrometer Frequency: 400 MHz**

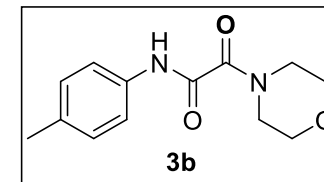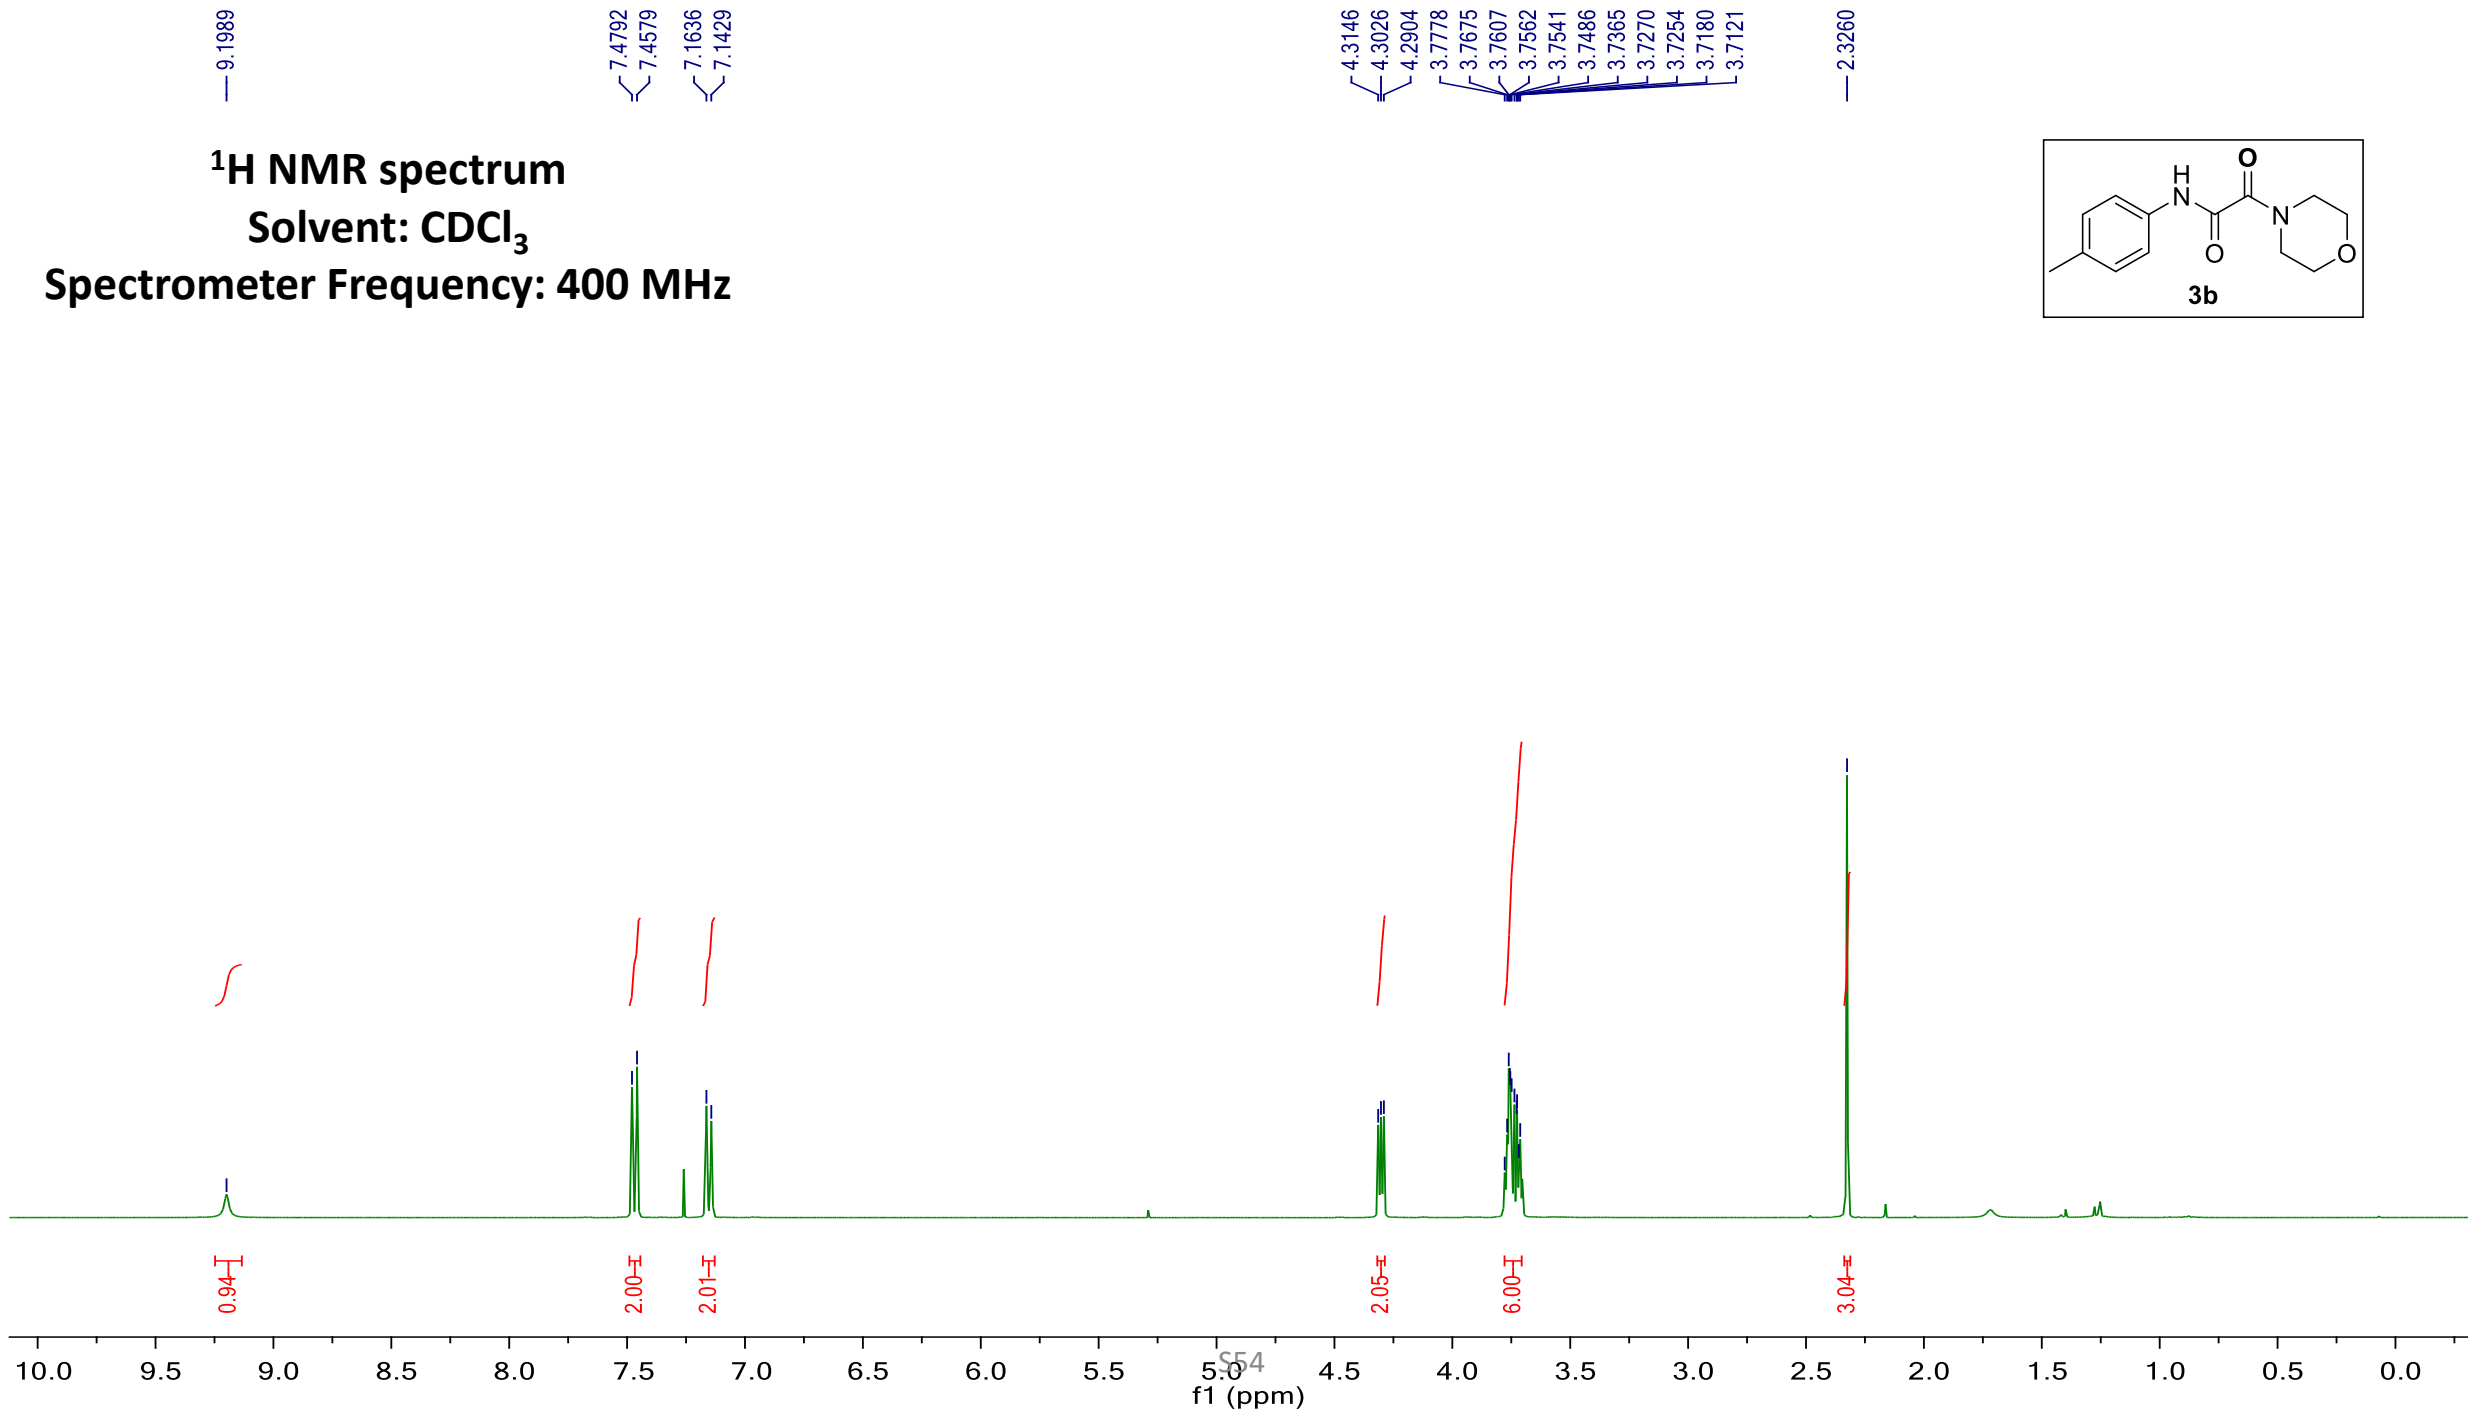

**$^{13}\text{C}$  { $^1\text{H}$ } NMR spectrum**  
**Solvent:  $\text{CDCl}_3$**   
**Spectrometer Frequency: 100 MHz**

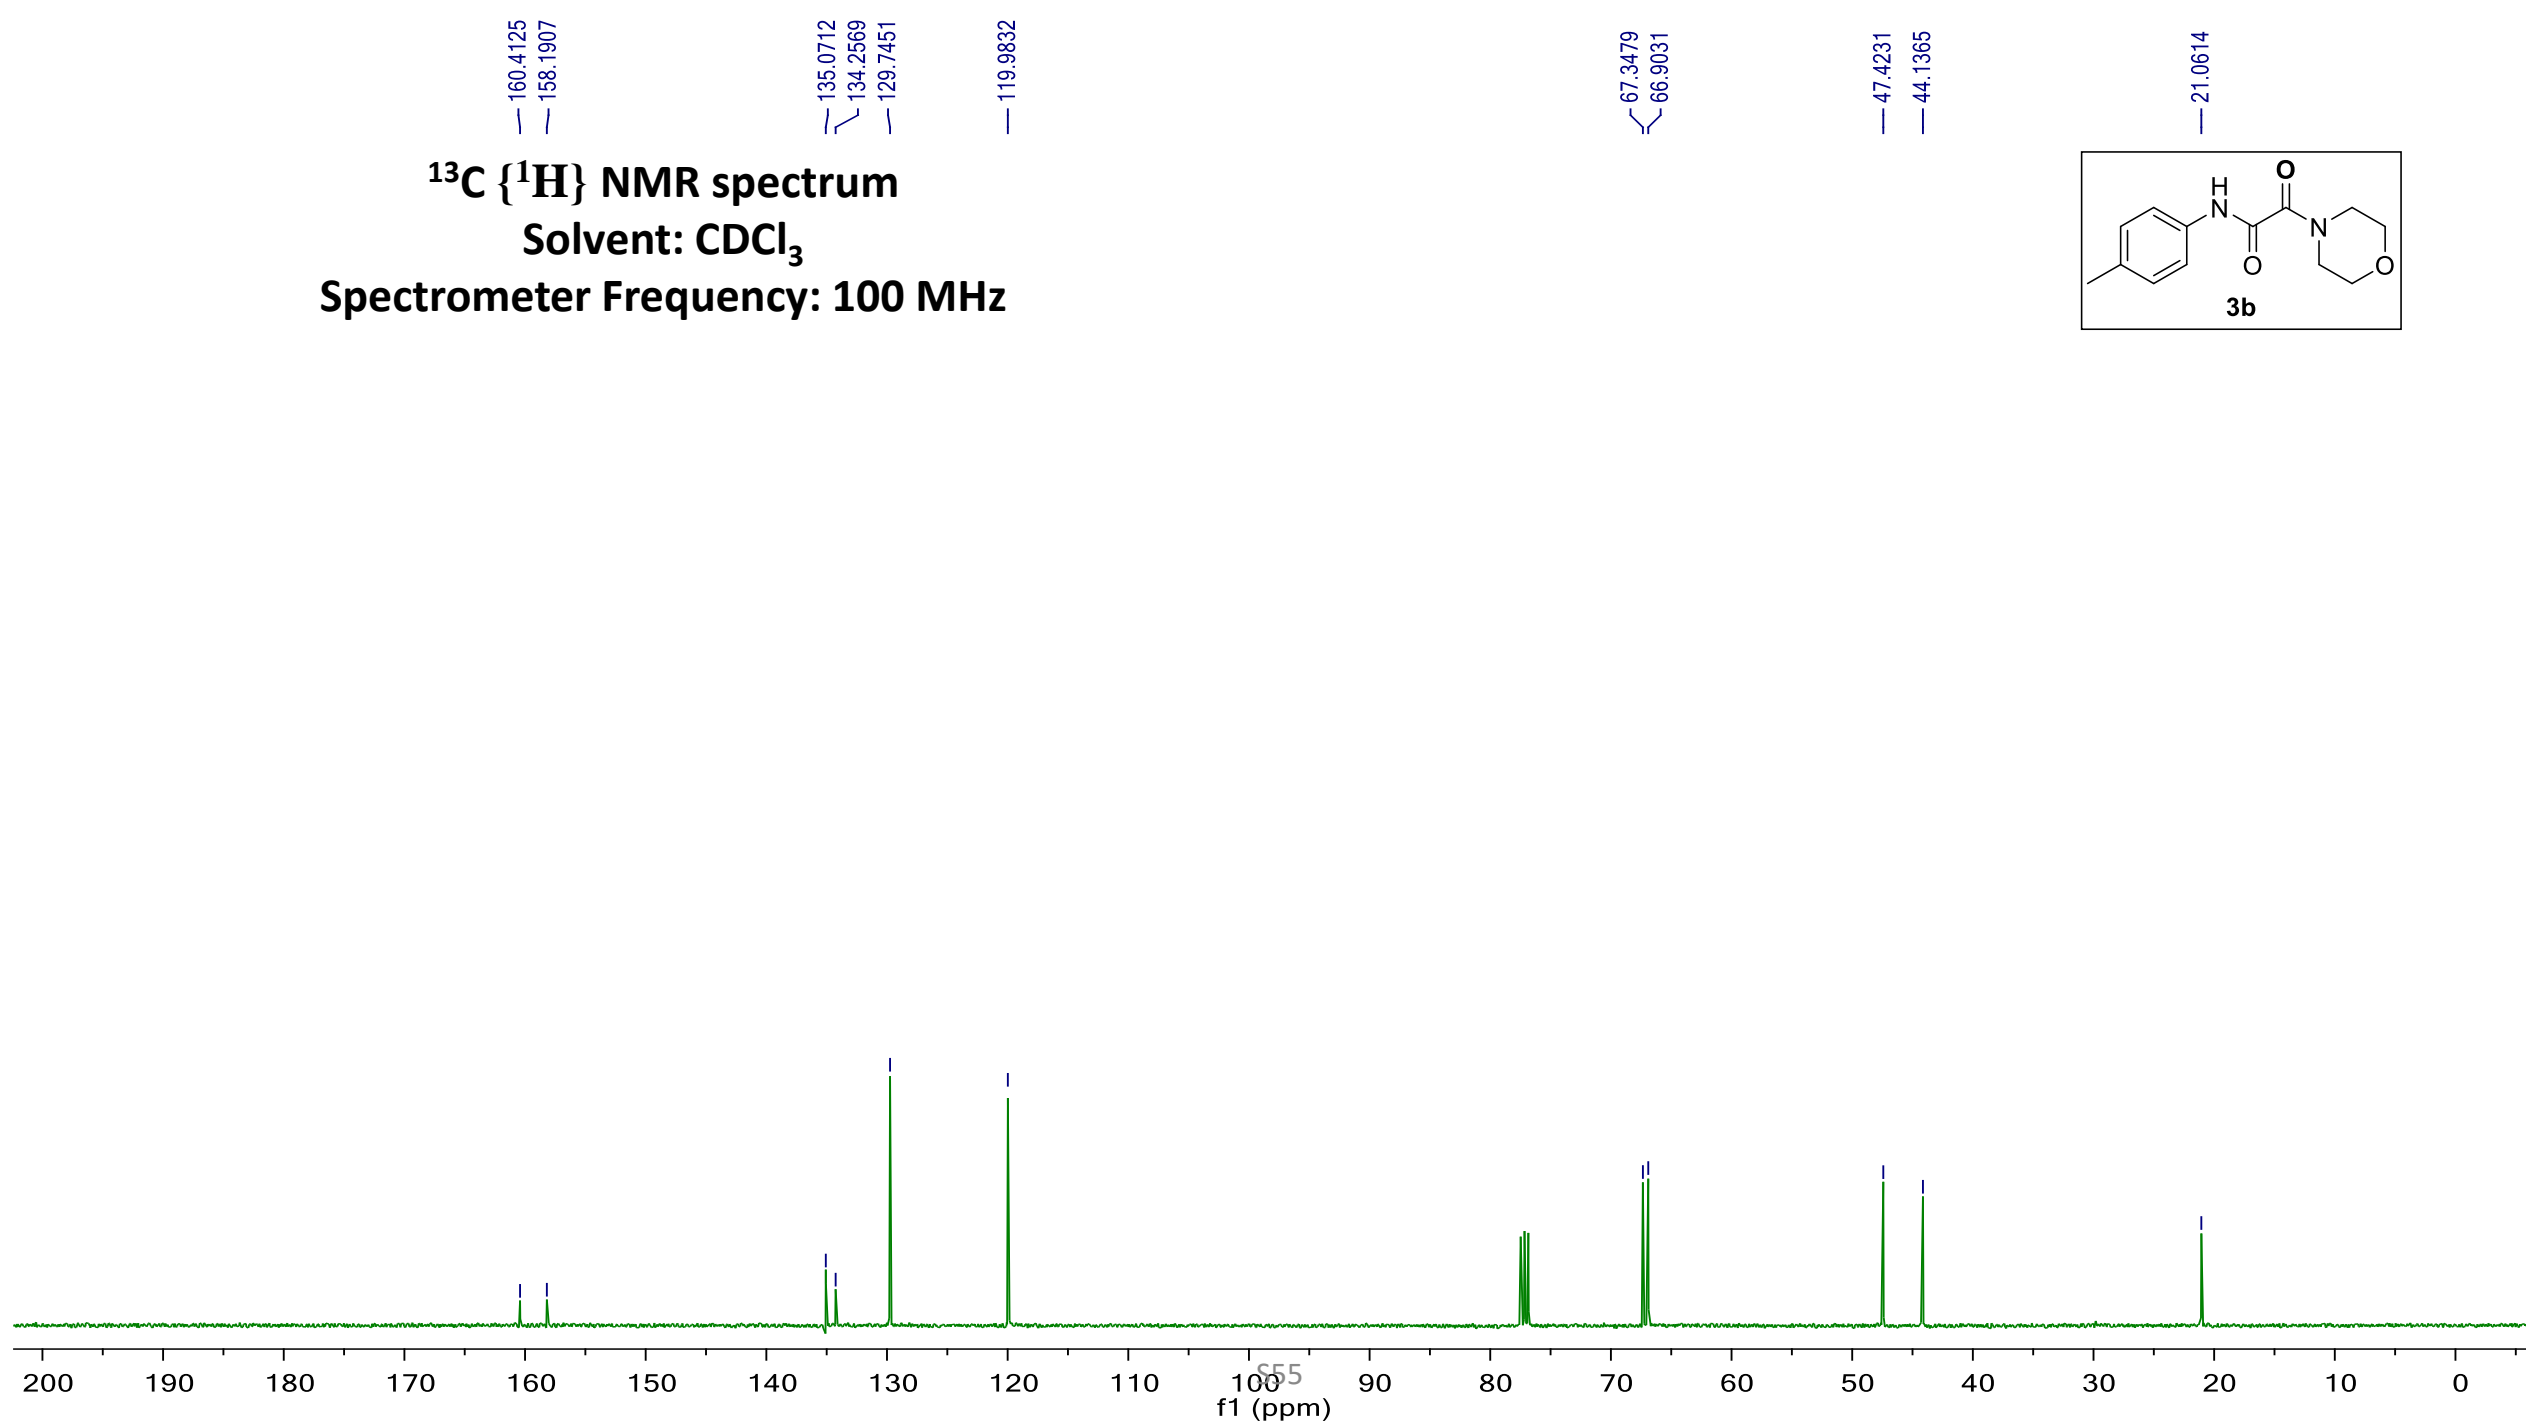

**$^1\text{H}$  NMR spectrum**  
**Solvent:  $\text{CDCl}_3$**   
**Spectrometer Frequency: 400 MHz**

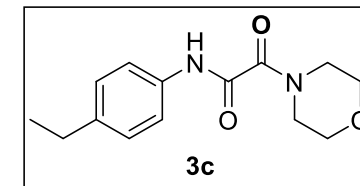

9.1937

7.5111

7.4899

7.2012

7.1800

4.3303

4.3183

4.3061

3.7813

3.7714

3.7692

3.7670

3.7592

3.7472

3.7399

3.7382

3.7249

2.6643

2.6453

2.6263

2.6073

1.2470

1.2280

1.2090

1.02

2.08

2.08

2.13

6.24

2.14

3.00

5.56  
f1 (ppm)

**$^{13}\text{C}$   $\{^1\text{H}\}$  NMR spectrum**  
**Solvent:  $\text{CDCl}_3$**   
**Spectrometer Frequency: 100 MHz**

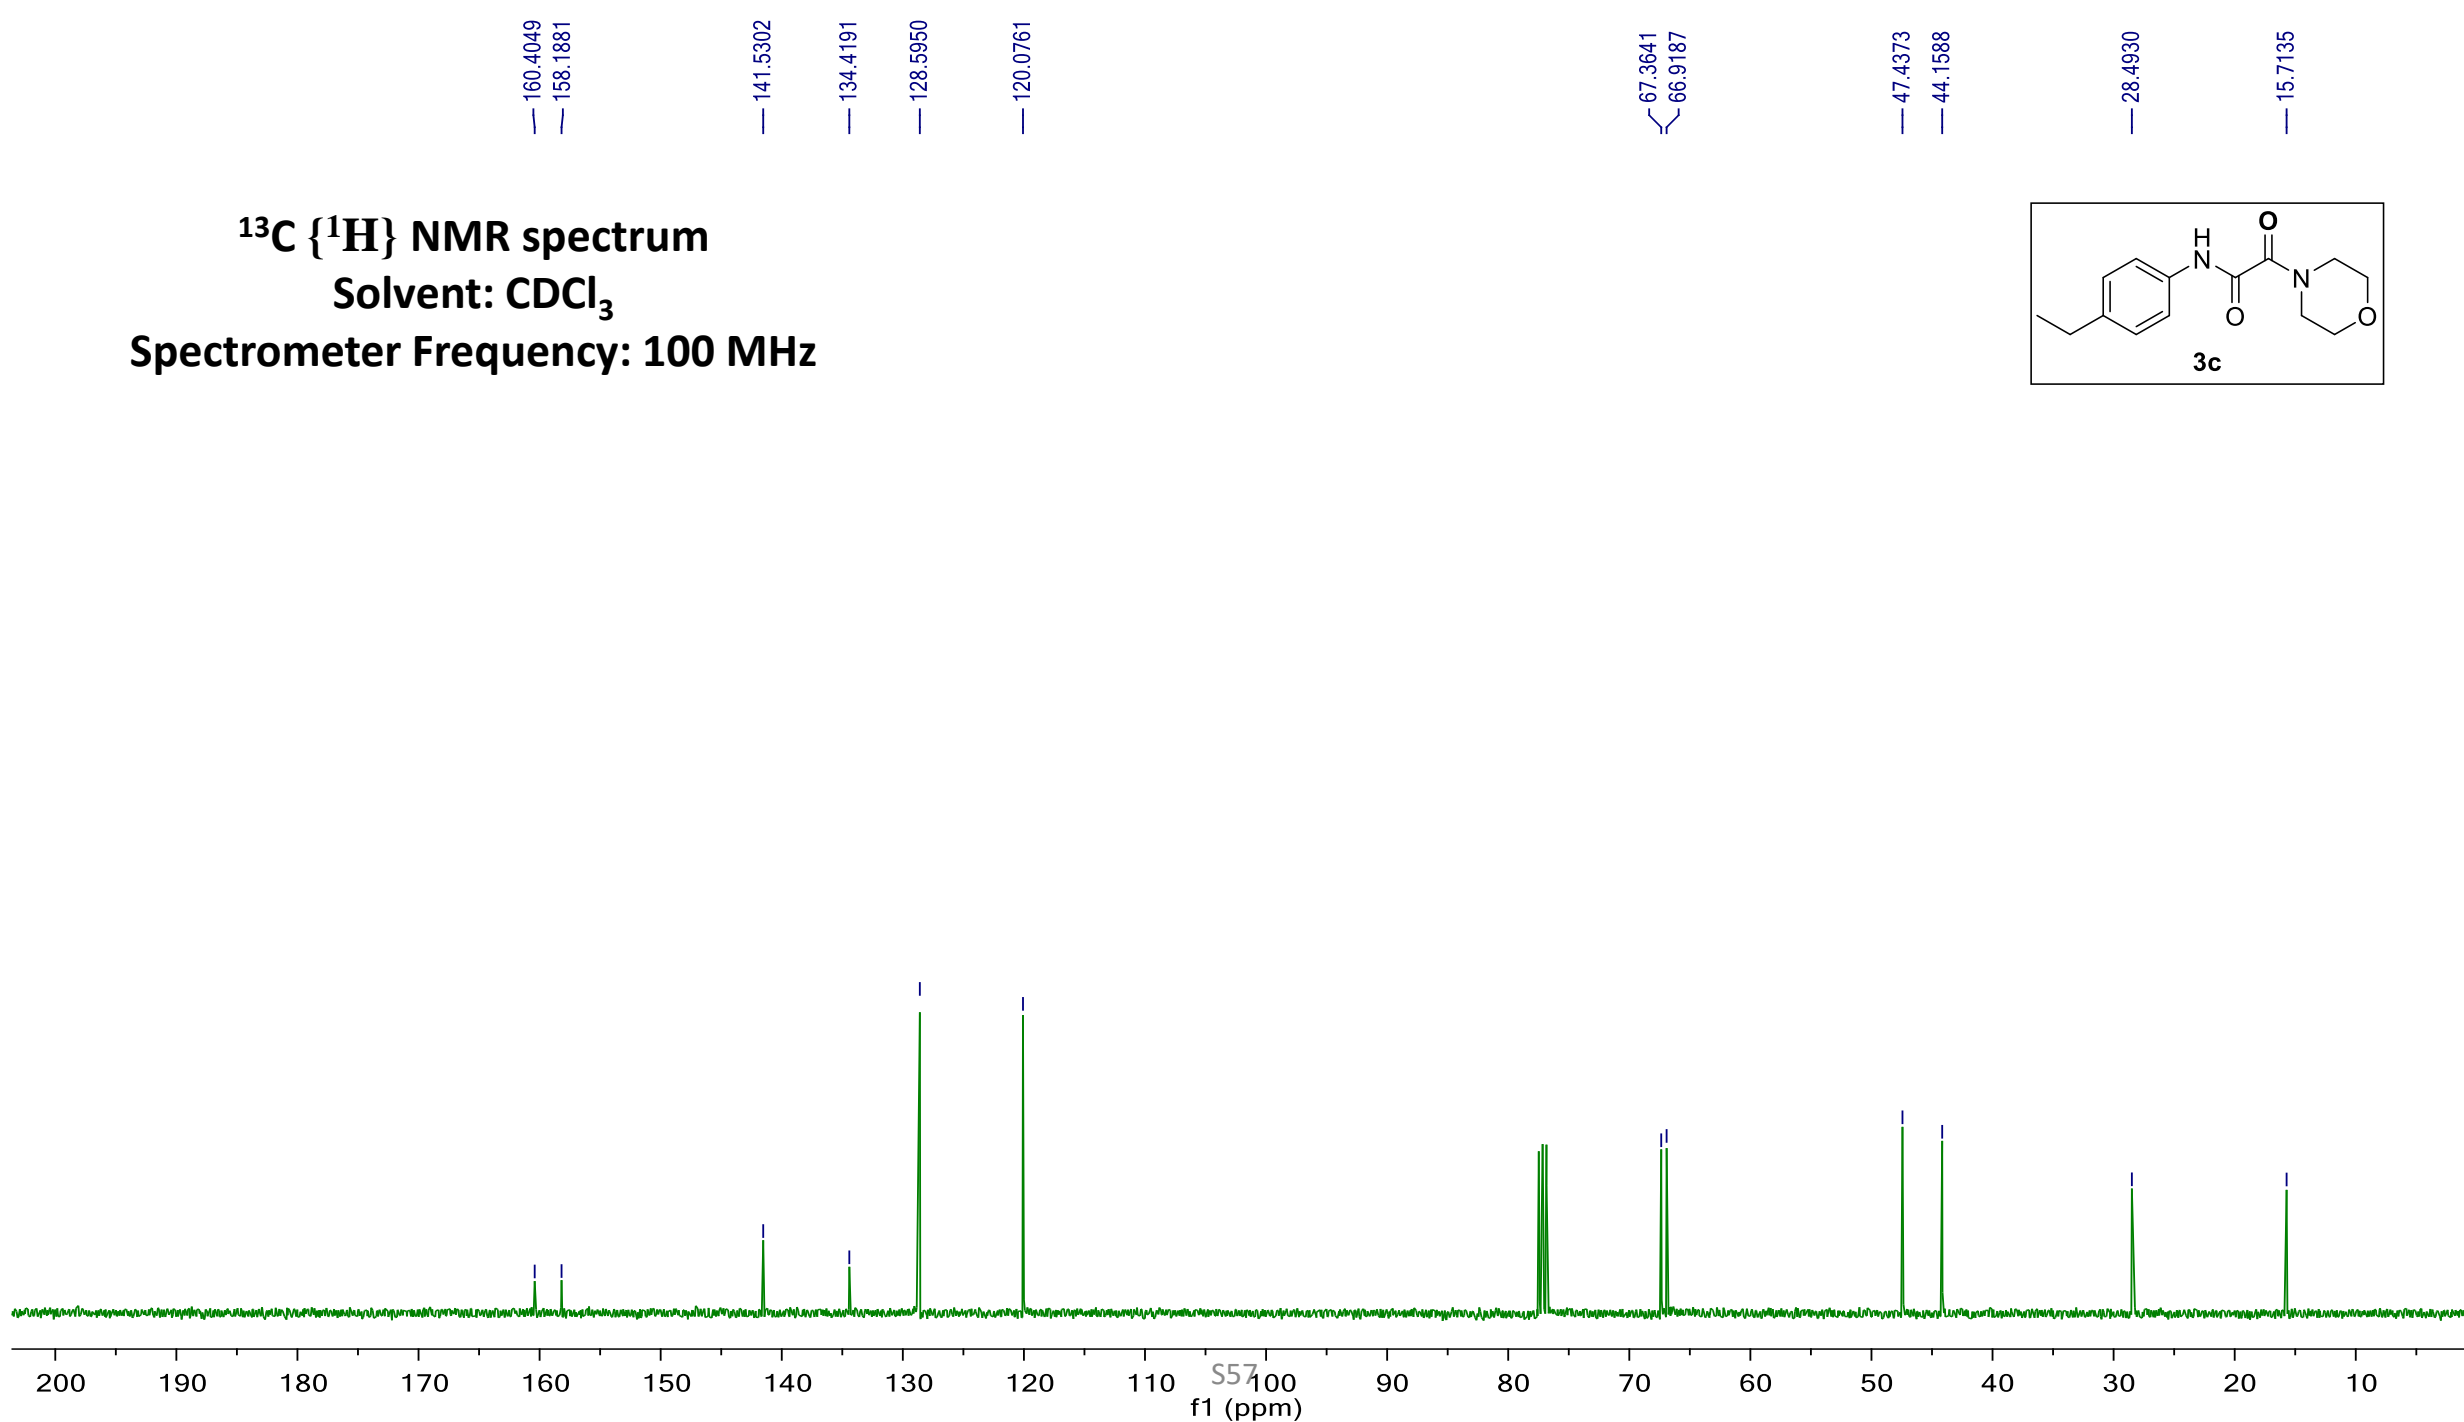

**$^1\text{H}$  NMR spectrum**  
**Solvent:  $\text{DMSO}-d_6$**   
**Spectrometer Frequency: 400 MHz**

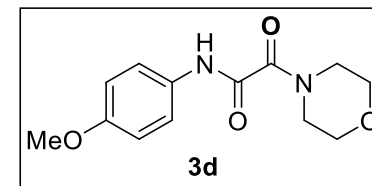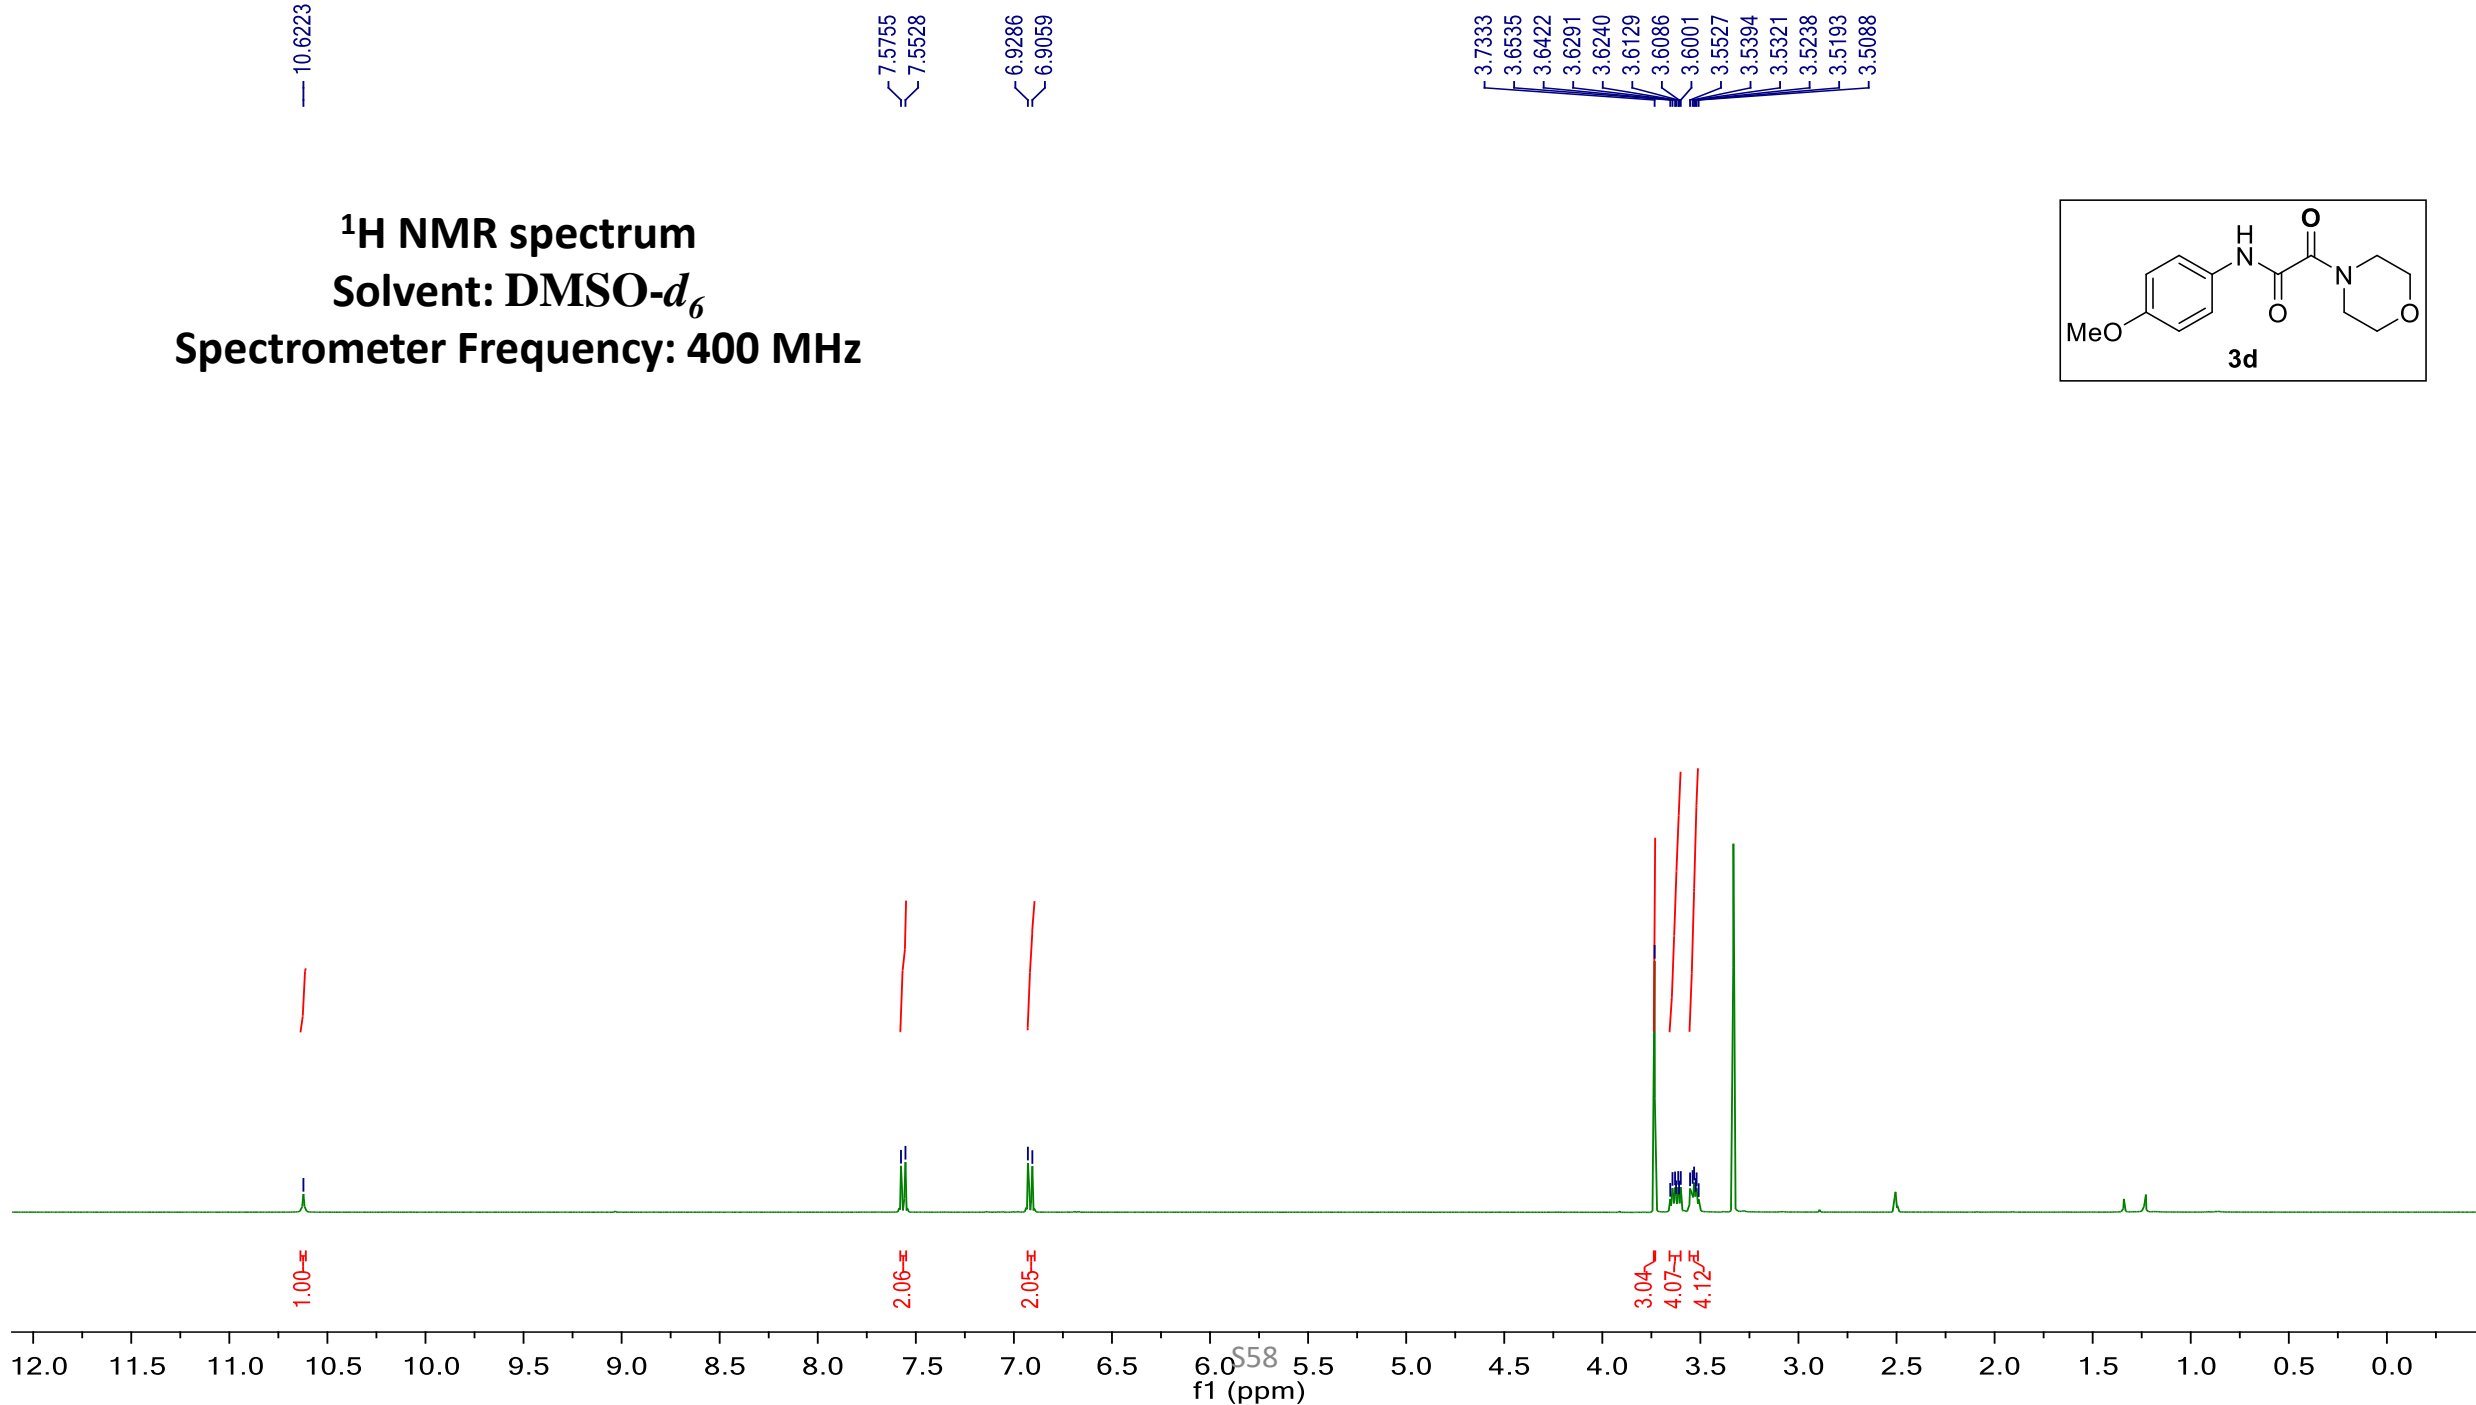

**$^{13}\text{C}$   $\{^1\text{H}\}$  NMR spectrum**  
**Solvent:  $\text{CDCl}_3$**   
**Spectrometer Frequency: 100 MHz**

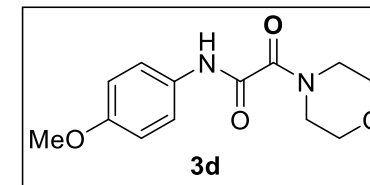

160.8049  
158.4221  
157.4183

130.2738

121.9372

114.6973

67.6570  
67.2100

55.9060

47.7254

44.4276

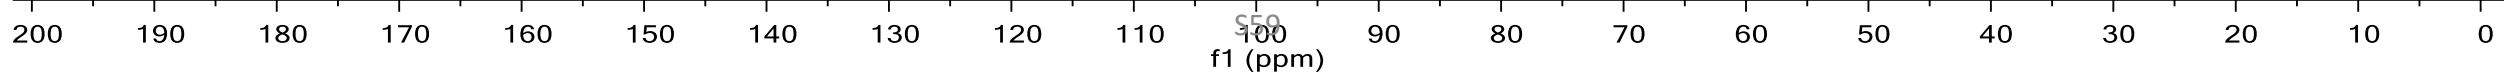

**$^1\text{H}$  NMR spectrum**  
**Solvent:  $\text{CDCl}_3$**   
**Spectrometer Frequency: 400 MHz**

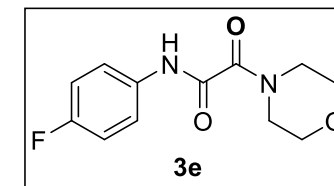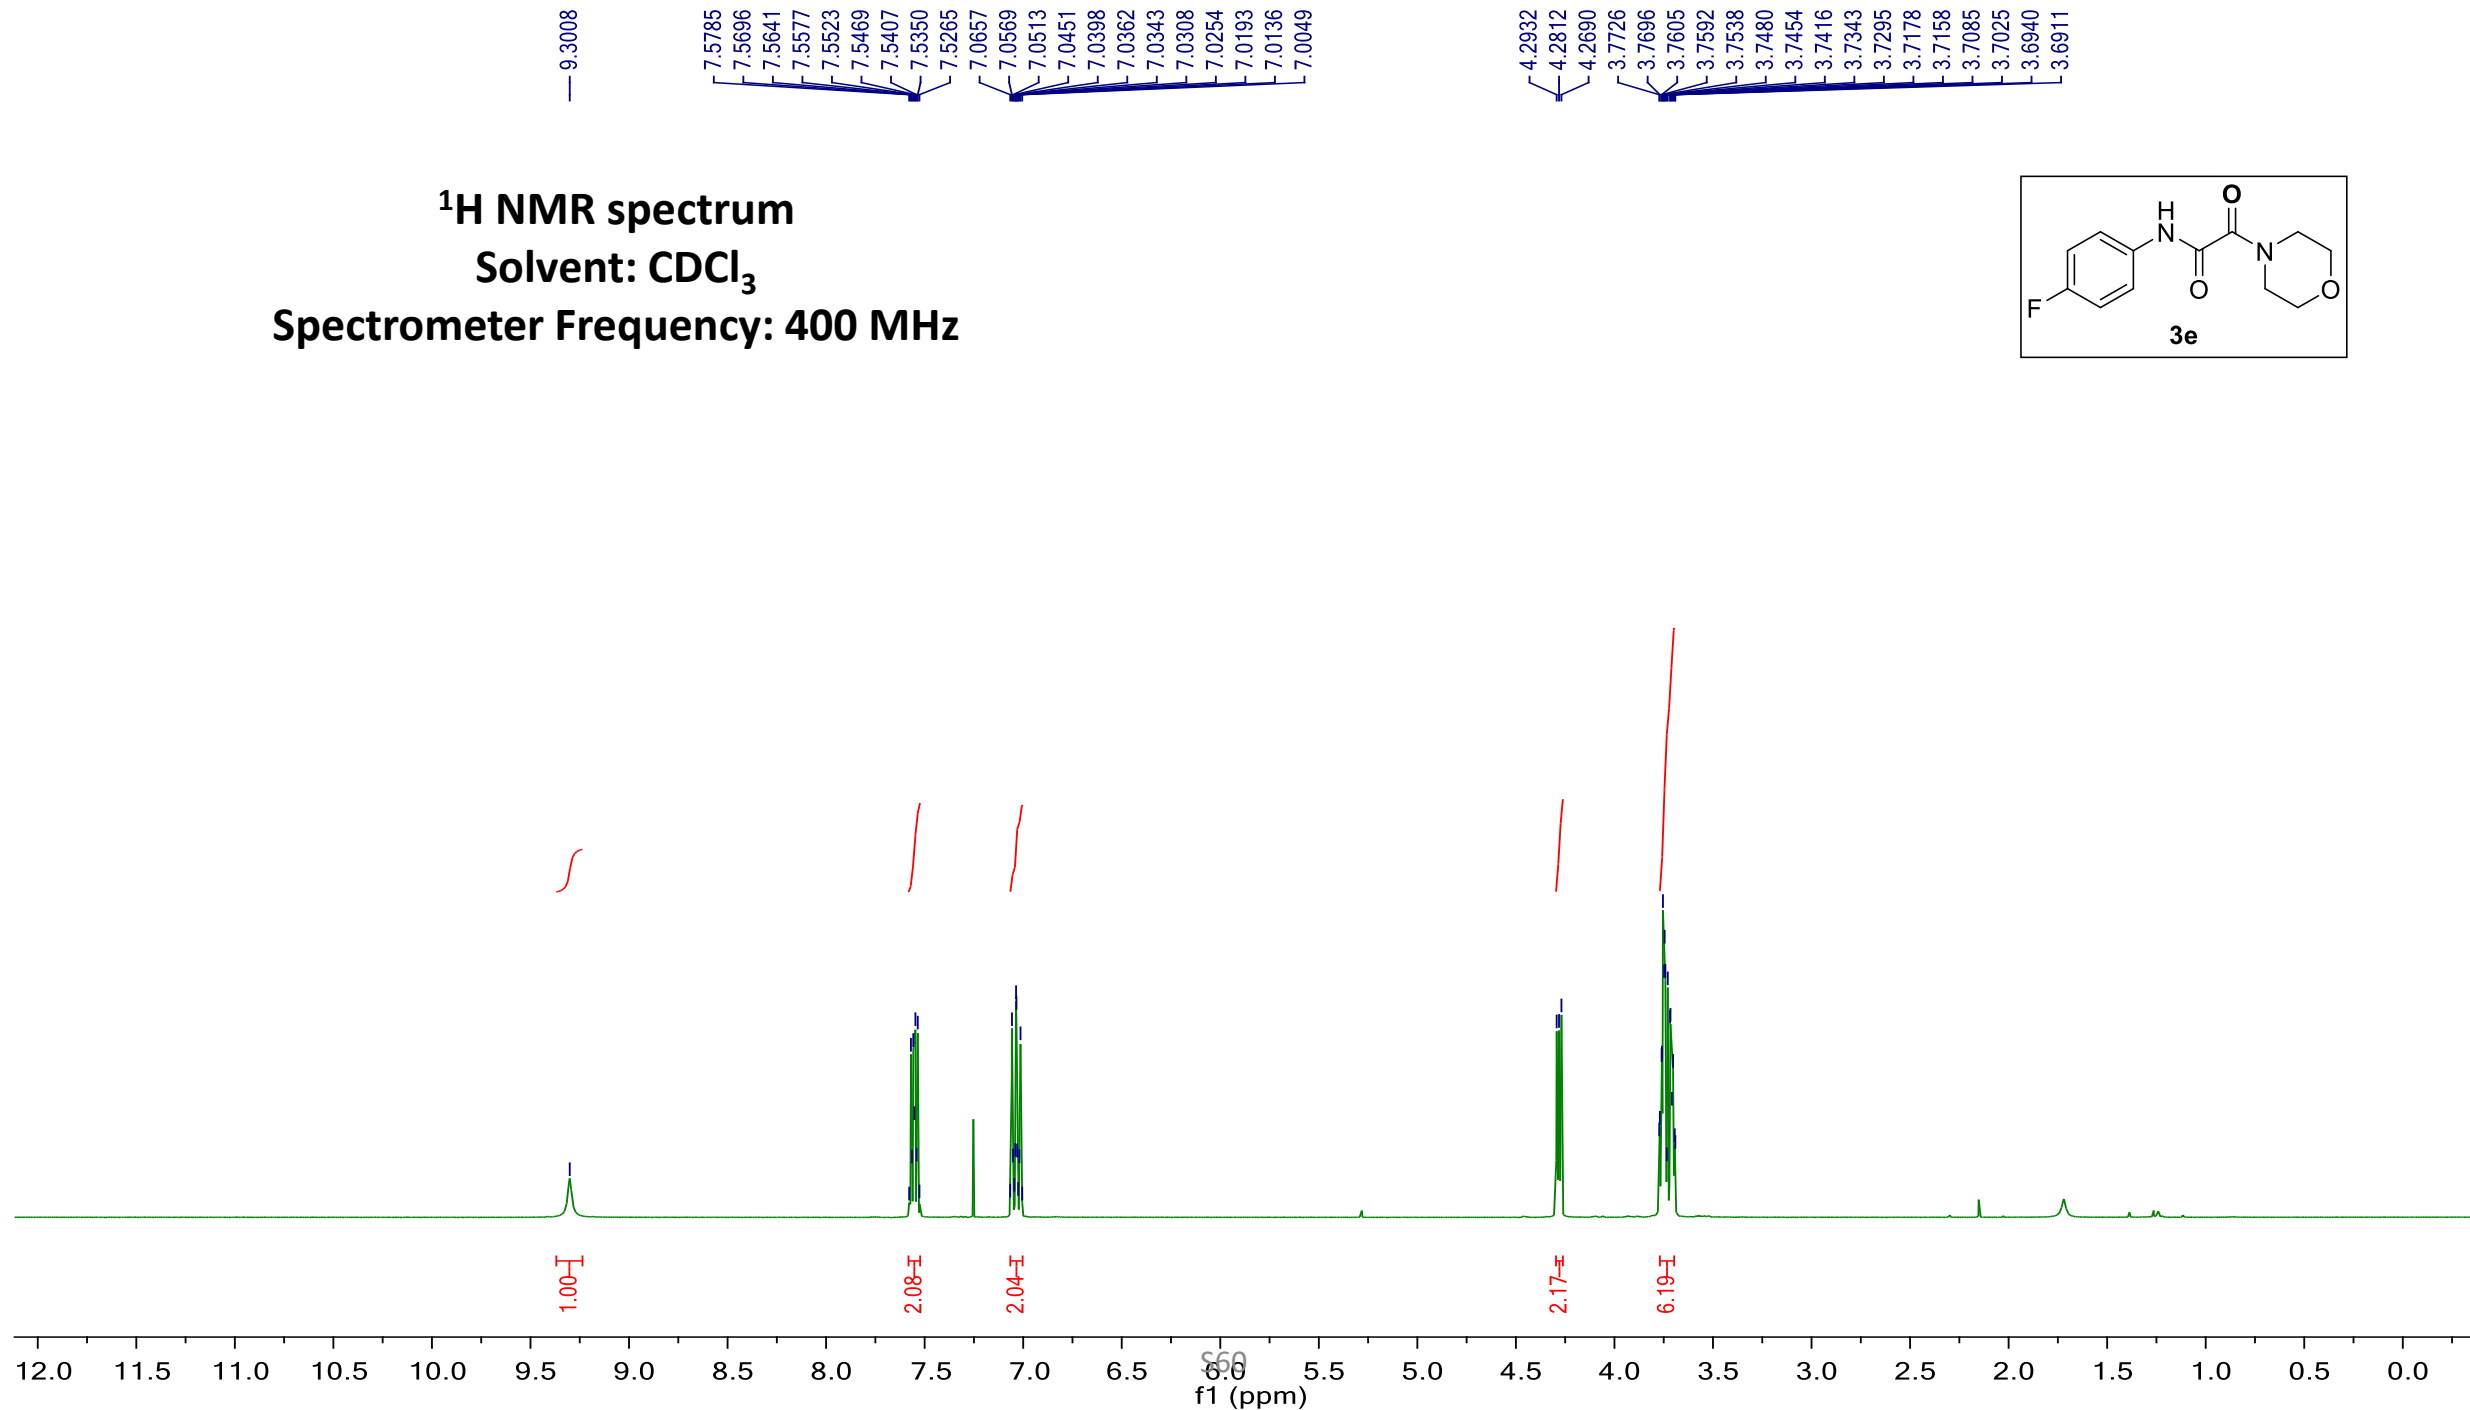

M0762-8  
AJ-II-4e

160.9933  
160.0371  
158.5642  
158.1022

132.7400  
132.7119

121.6330  
121.5526  
115.9208  
115.6973

67.1448  
66.7056

47.2482  
44.0000

**$^{13}\text{C}$  { $^1\text{H}$ } NMR spectrum**  
**Solvent:  $\text{CDCl}_3$**   
**Spectrometer Frequency: 100 MHz**

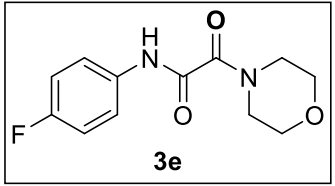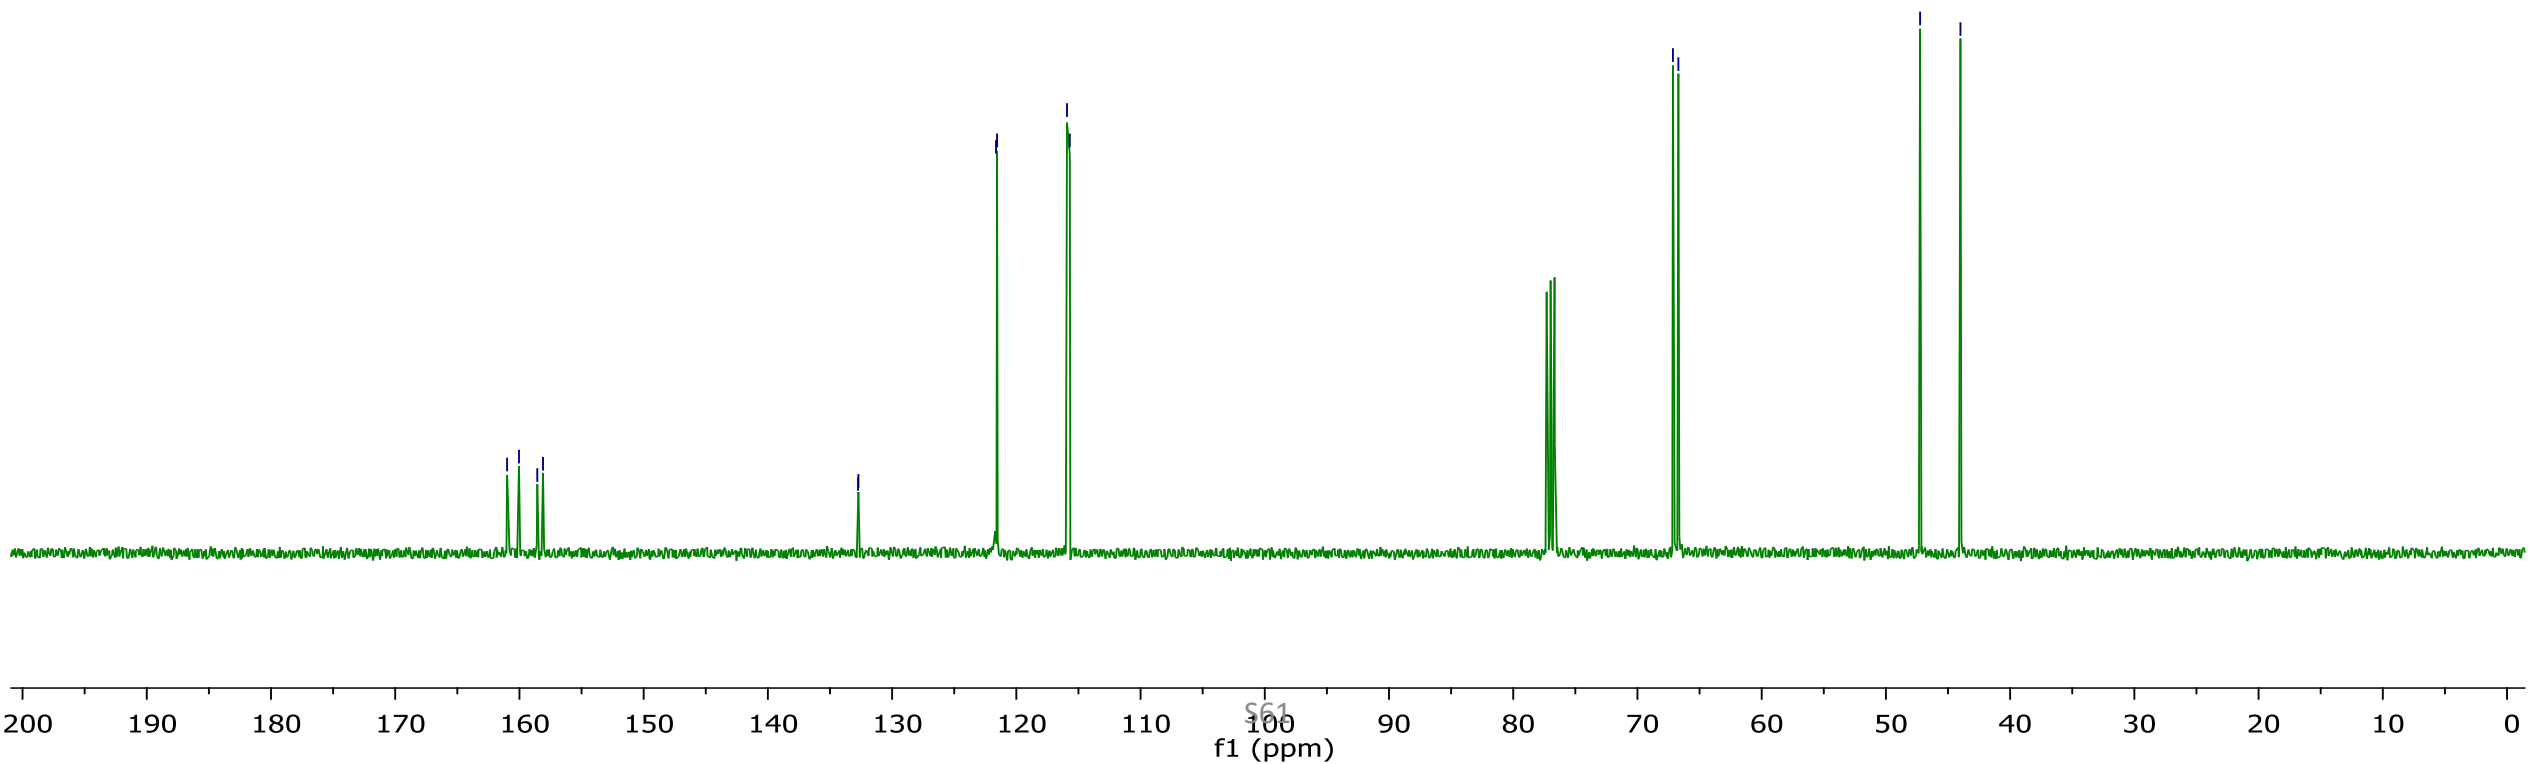

**$^{19}\text{F}\{^1\text{H}\}$  NMR spectrum**

**Solvent:  $\text{CDCl}_3$**

**Spectrometer Frequency: 376 MHz**

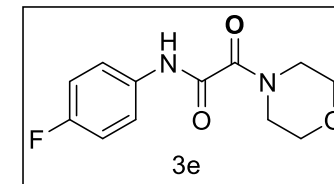

— -116.4308

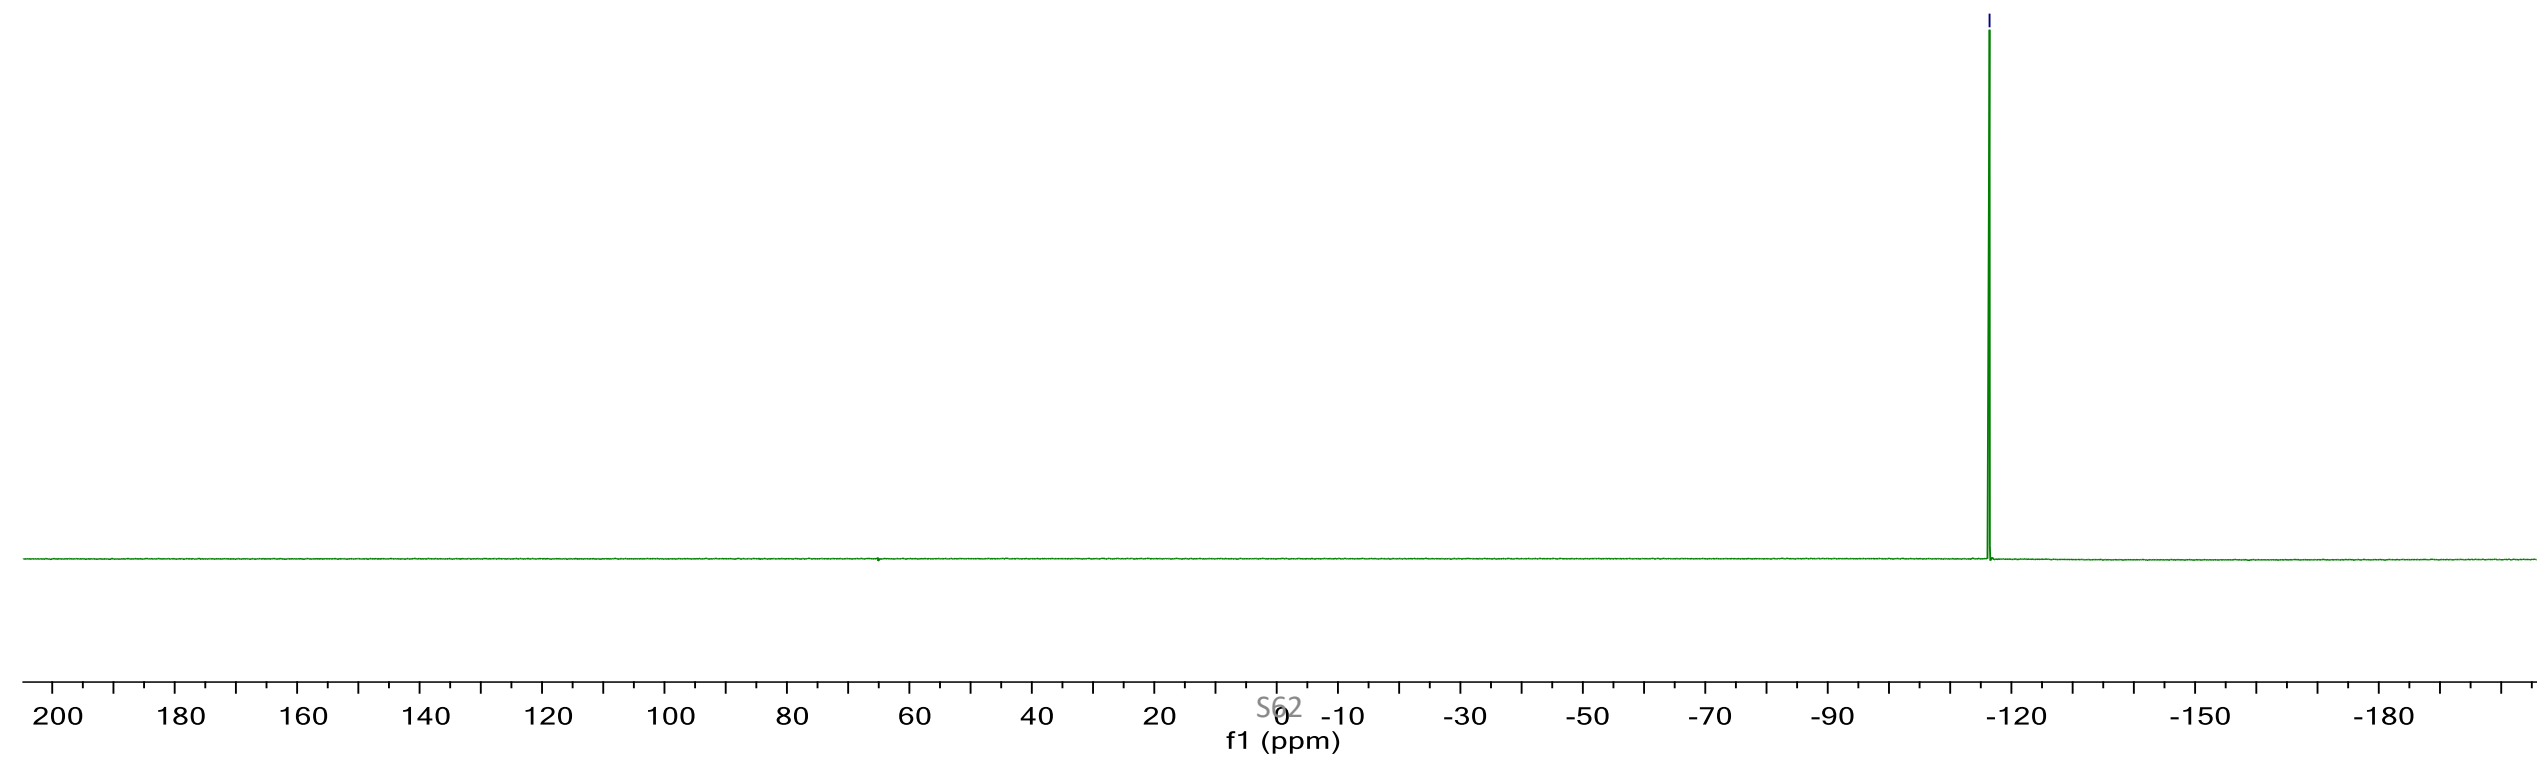

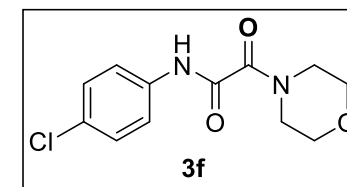

**$^1\text{H}$  NMR spectrum**  
**Solvent:  $\text{CDCl}_3$**   
**Spectrometer Frequency: 400 MHz**

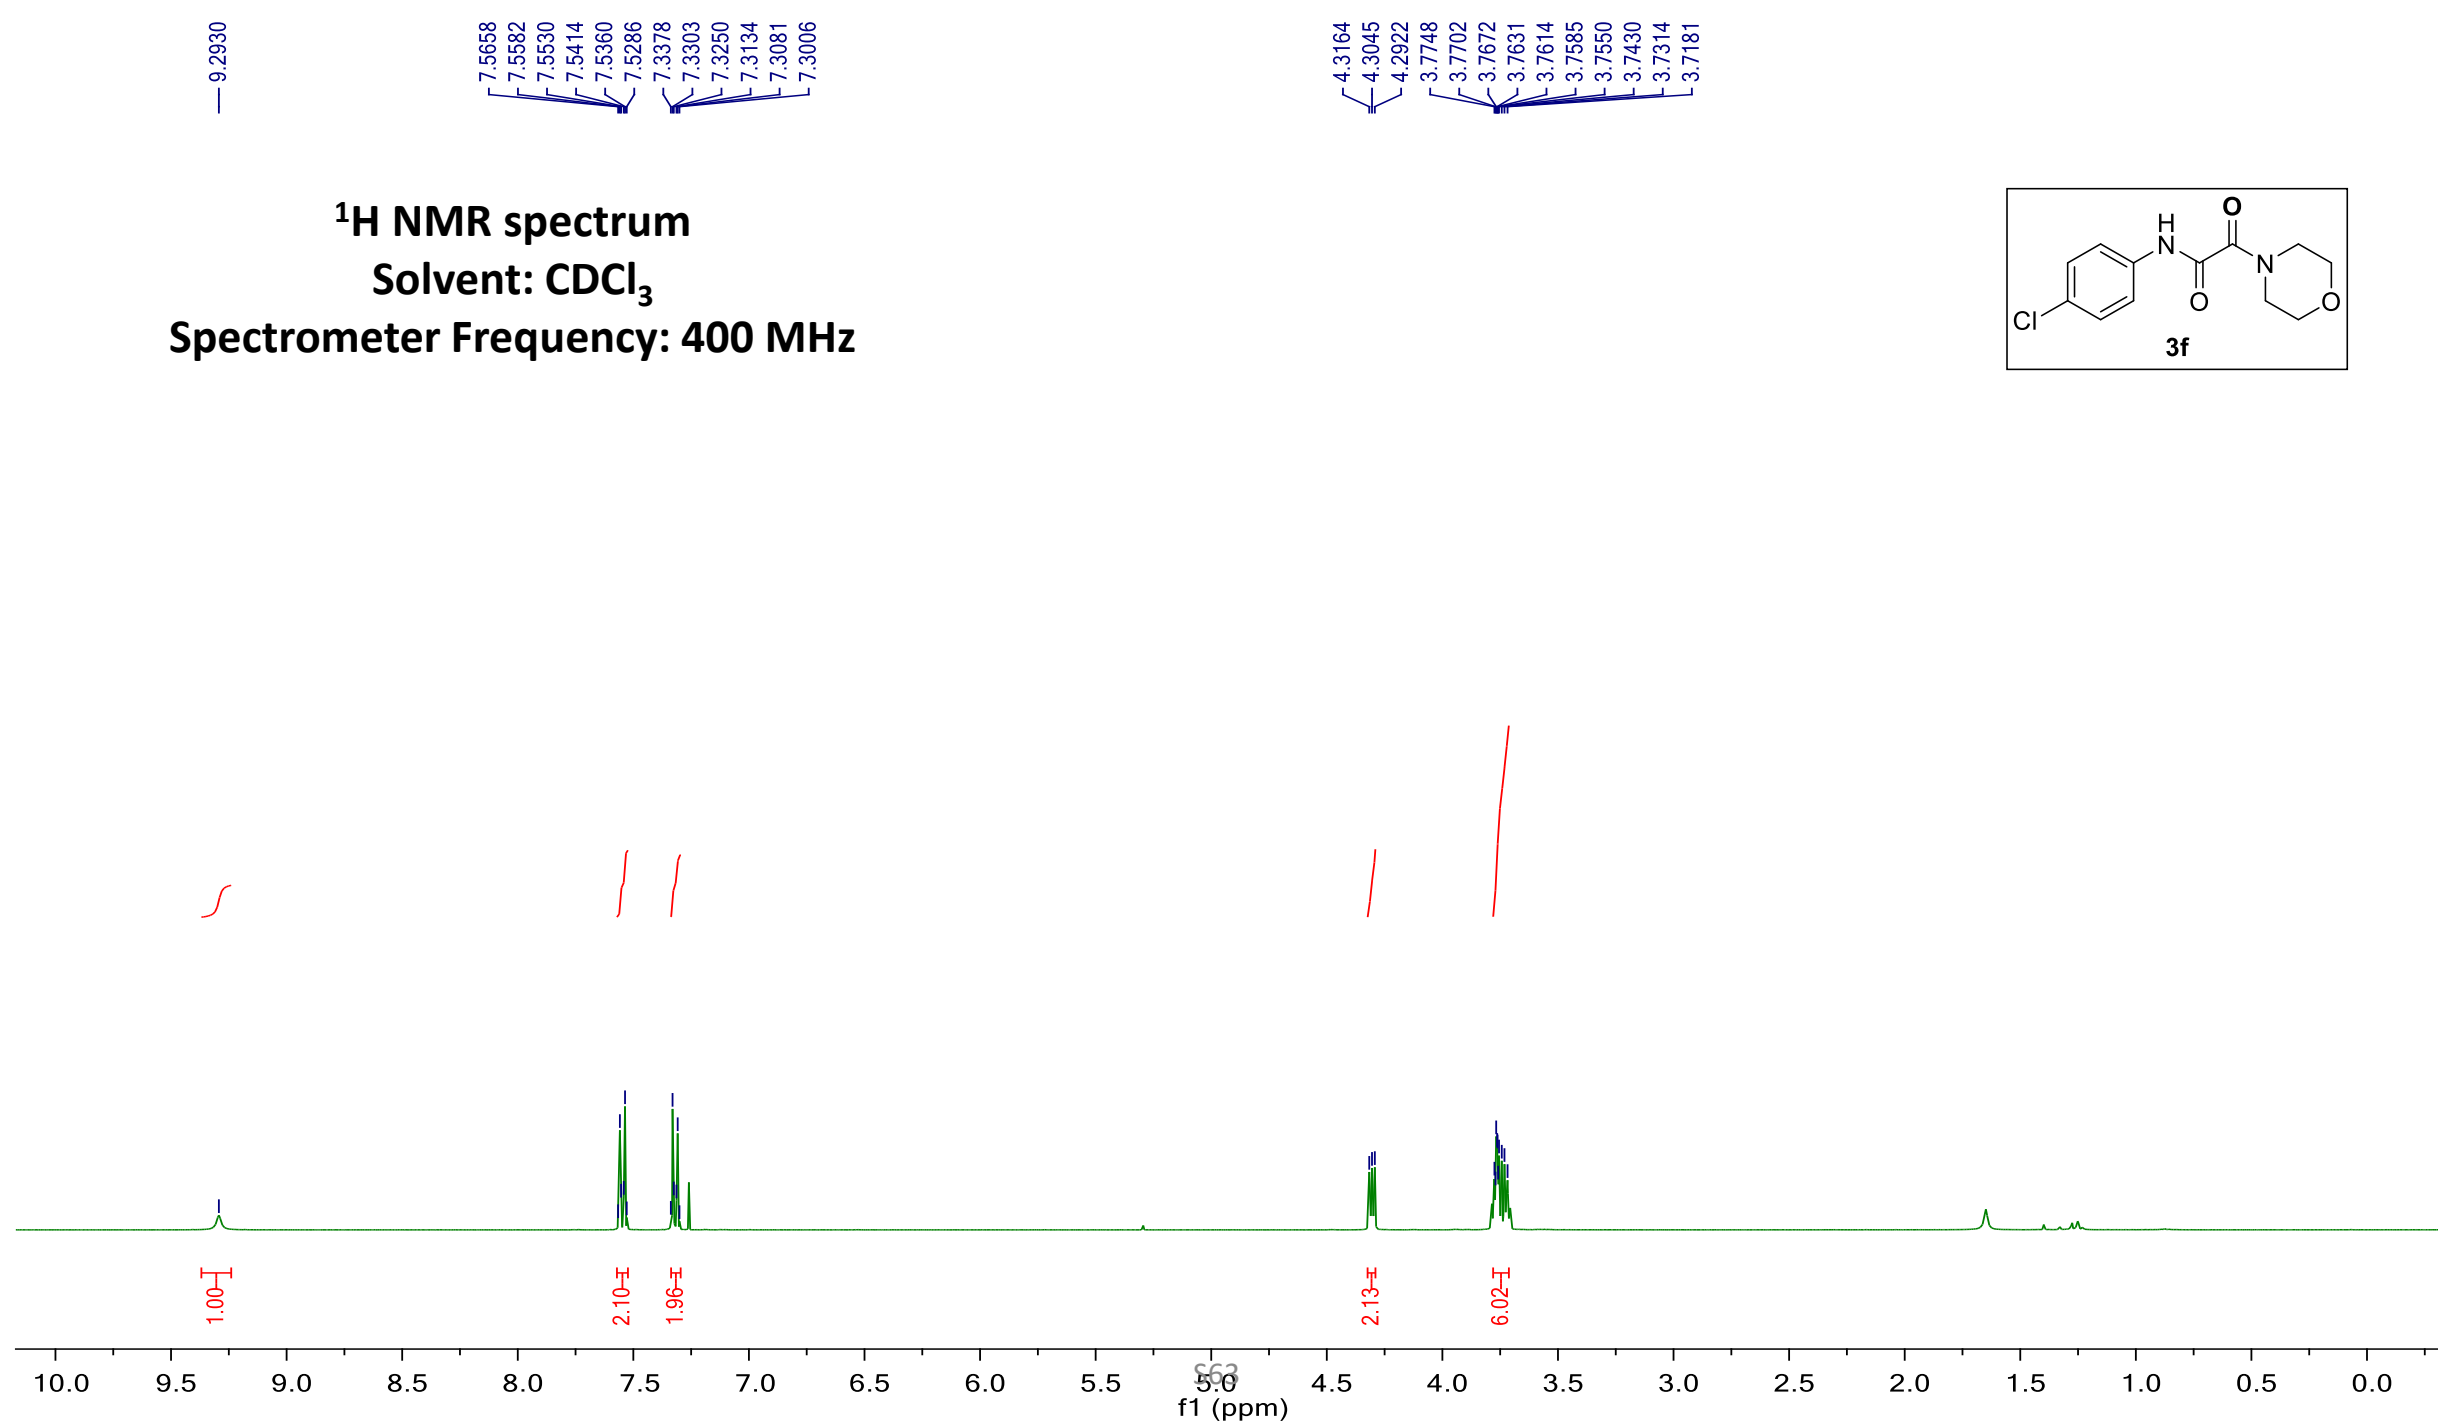

**$^{13}\text{C}$  { $^1\text{H}$ } NMR spectrum**  
**Solvent:  $\text{CDCl}_3$**   
**Spectrometer Frequency: 100 MHz**

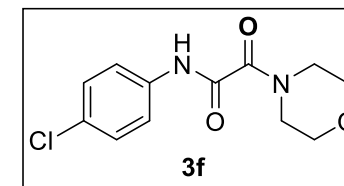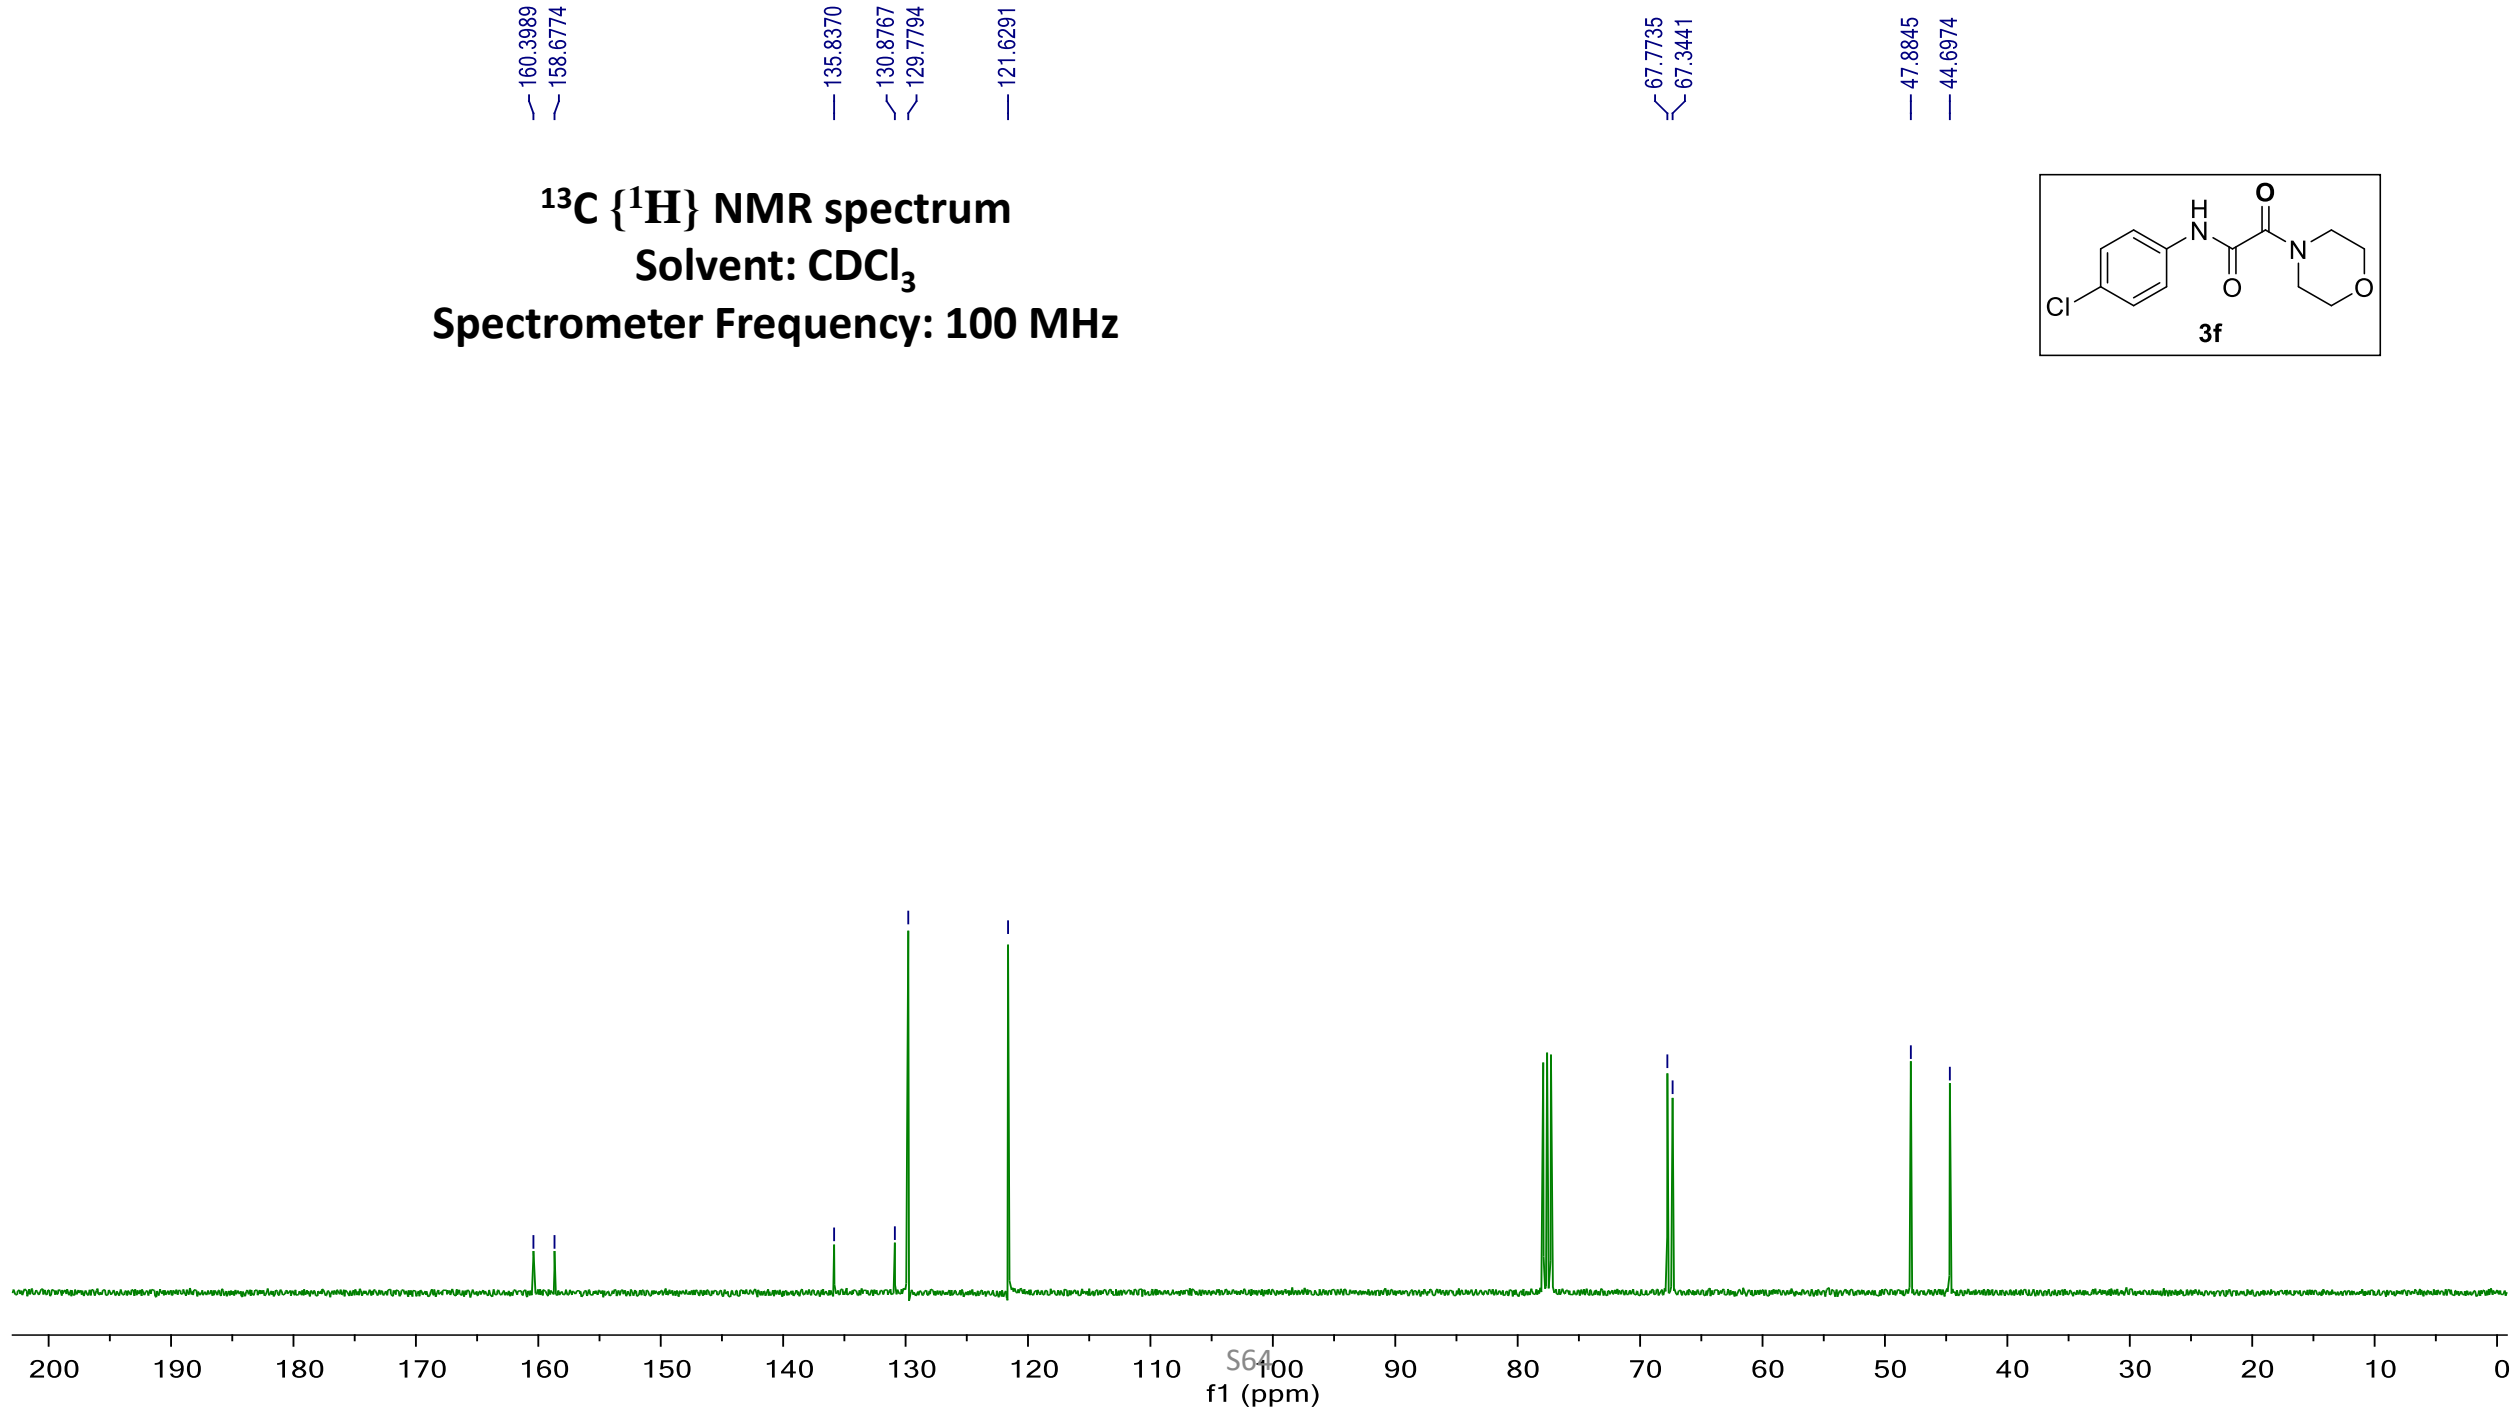

**$^1\text{H}$  NMR spectrum**  
**Solvent:  $\text{CDCl}_3$**   
**Spectrometer Frequency: 400 MHz**

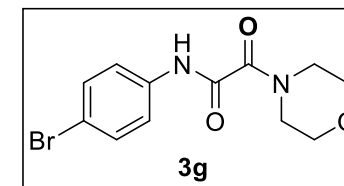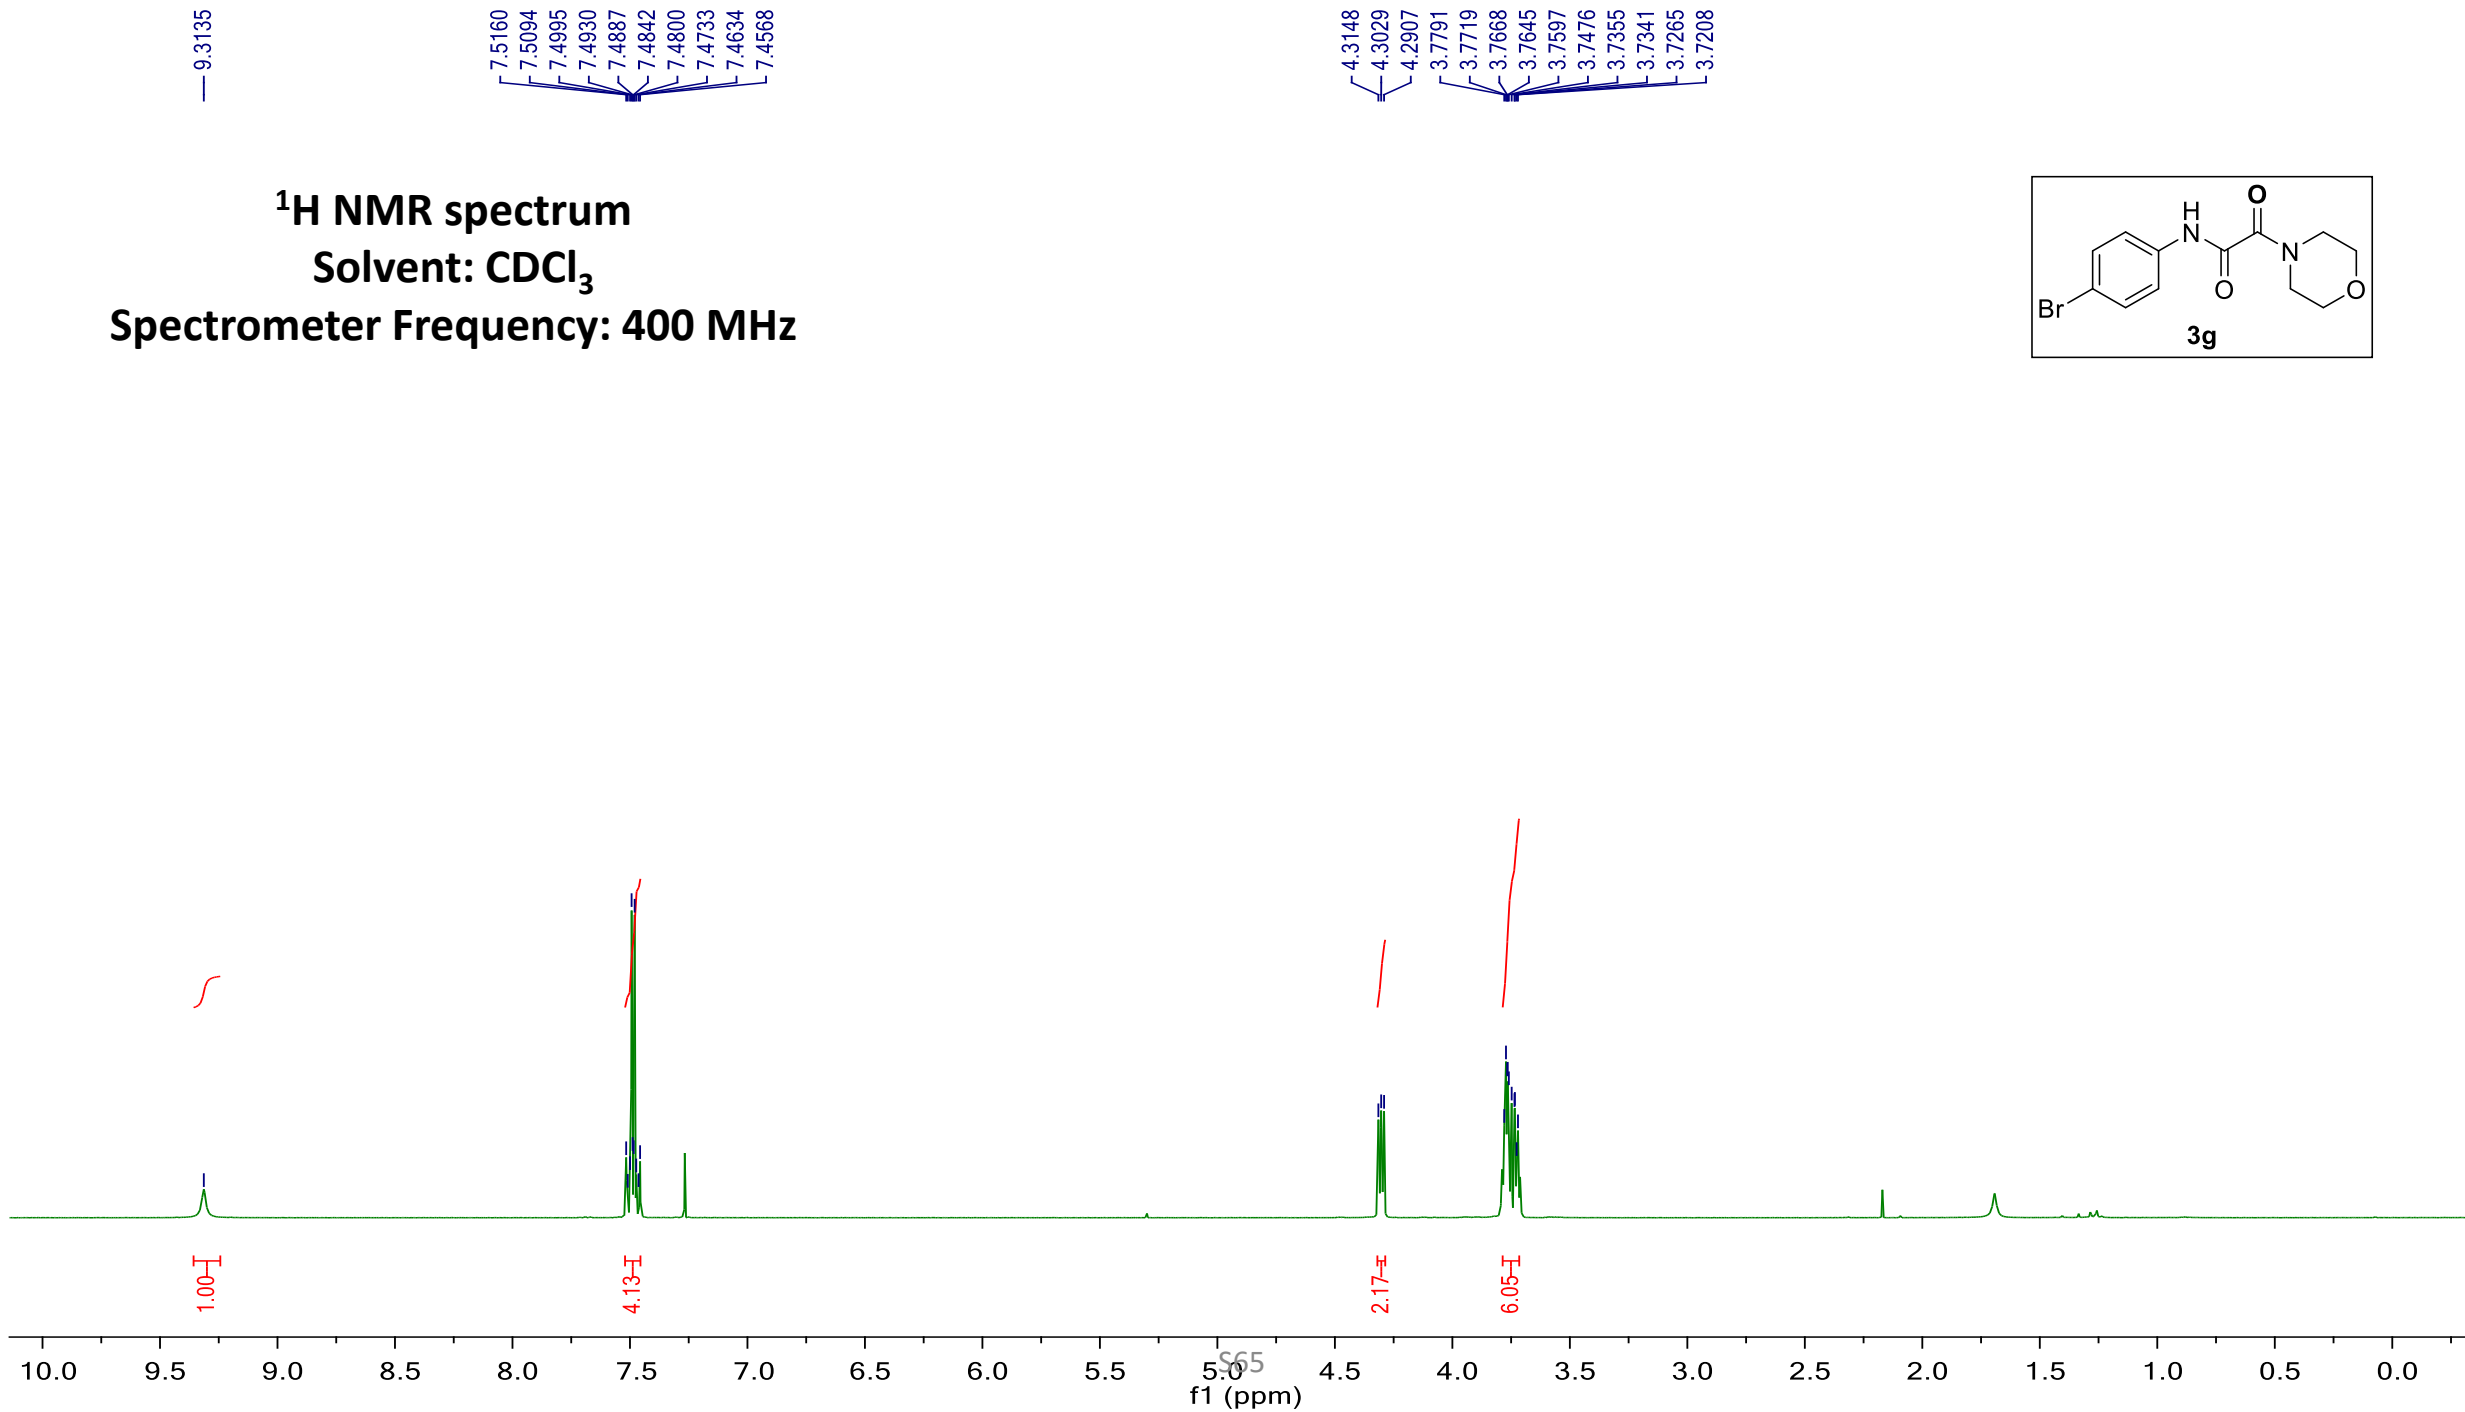

**$^{13}\text{C}$   $\{^1\text{H}\}$  NMR spectrum**  
**Solvent:  $\text{CDCl}_3$**   
**Spectrometer Frequency: 100 MHz**

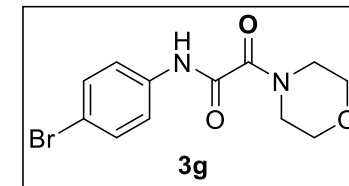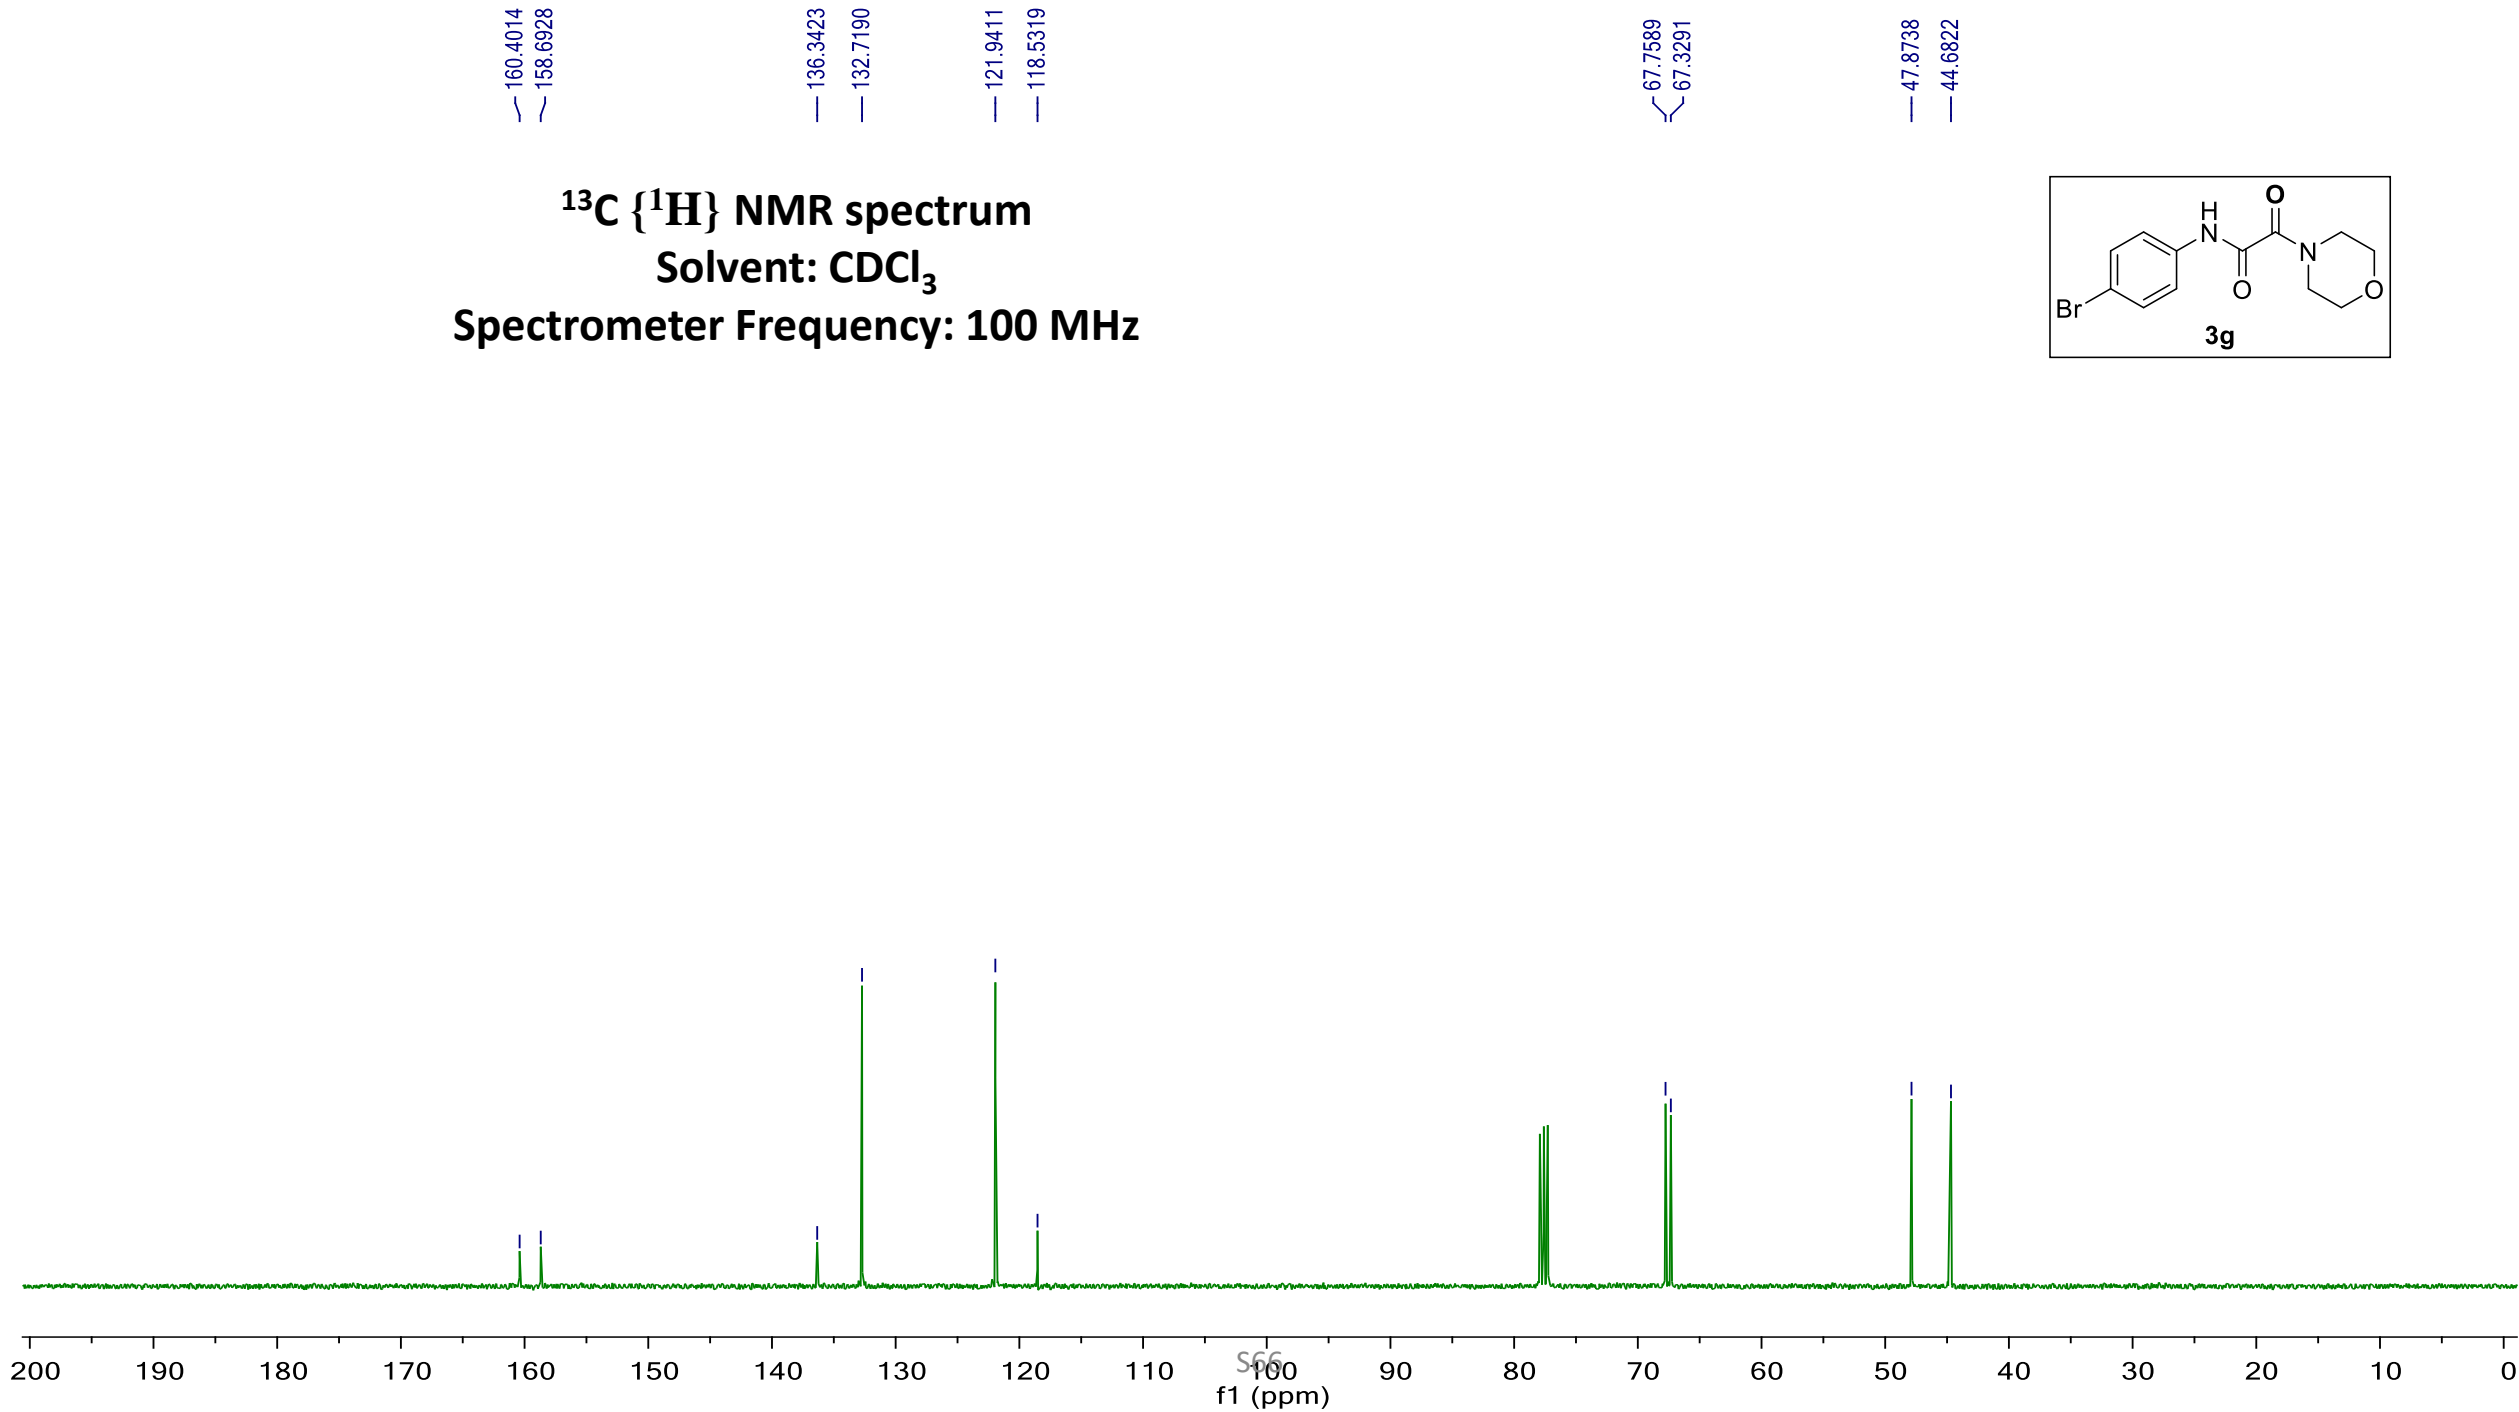

**$^1\text{H}$  NMR spectrum**

**Solvent: DMSO- $d_6$**

**Spectrometer Frequency: 600 MHz**

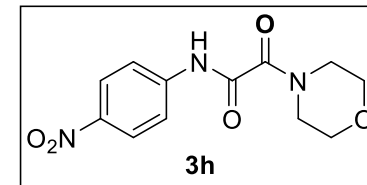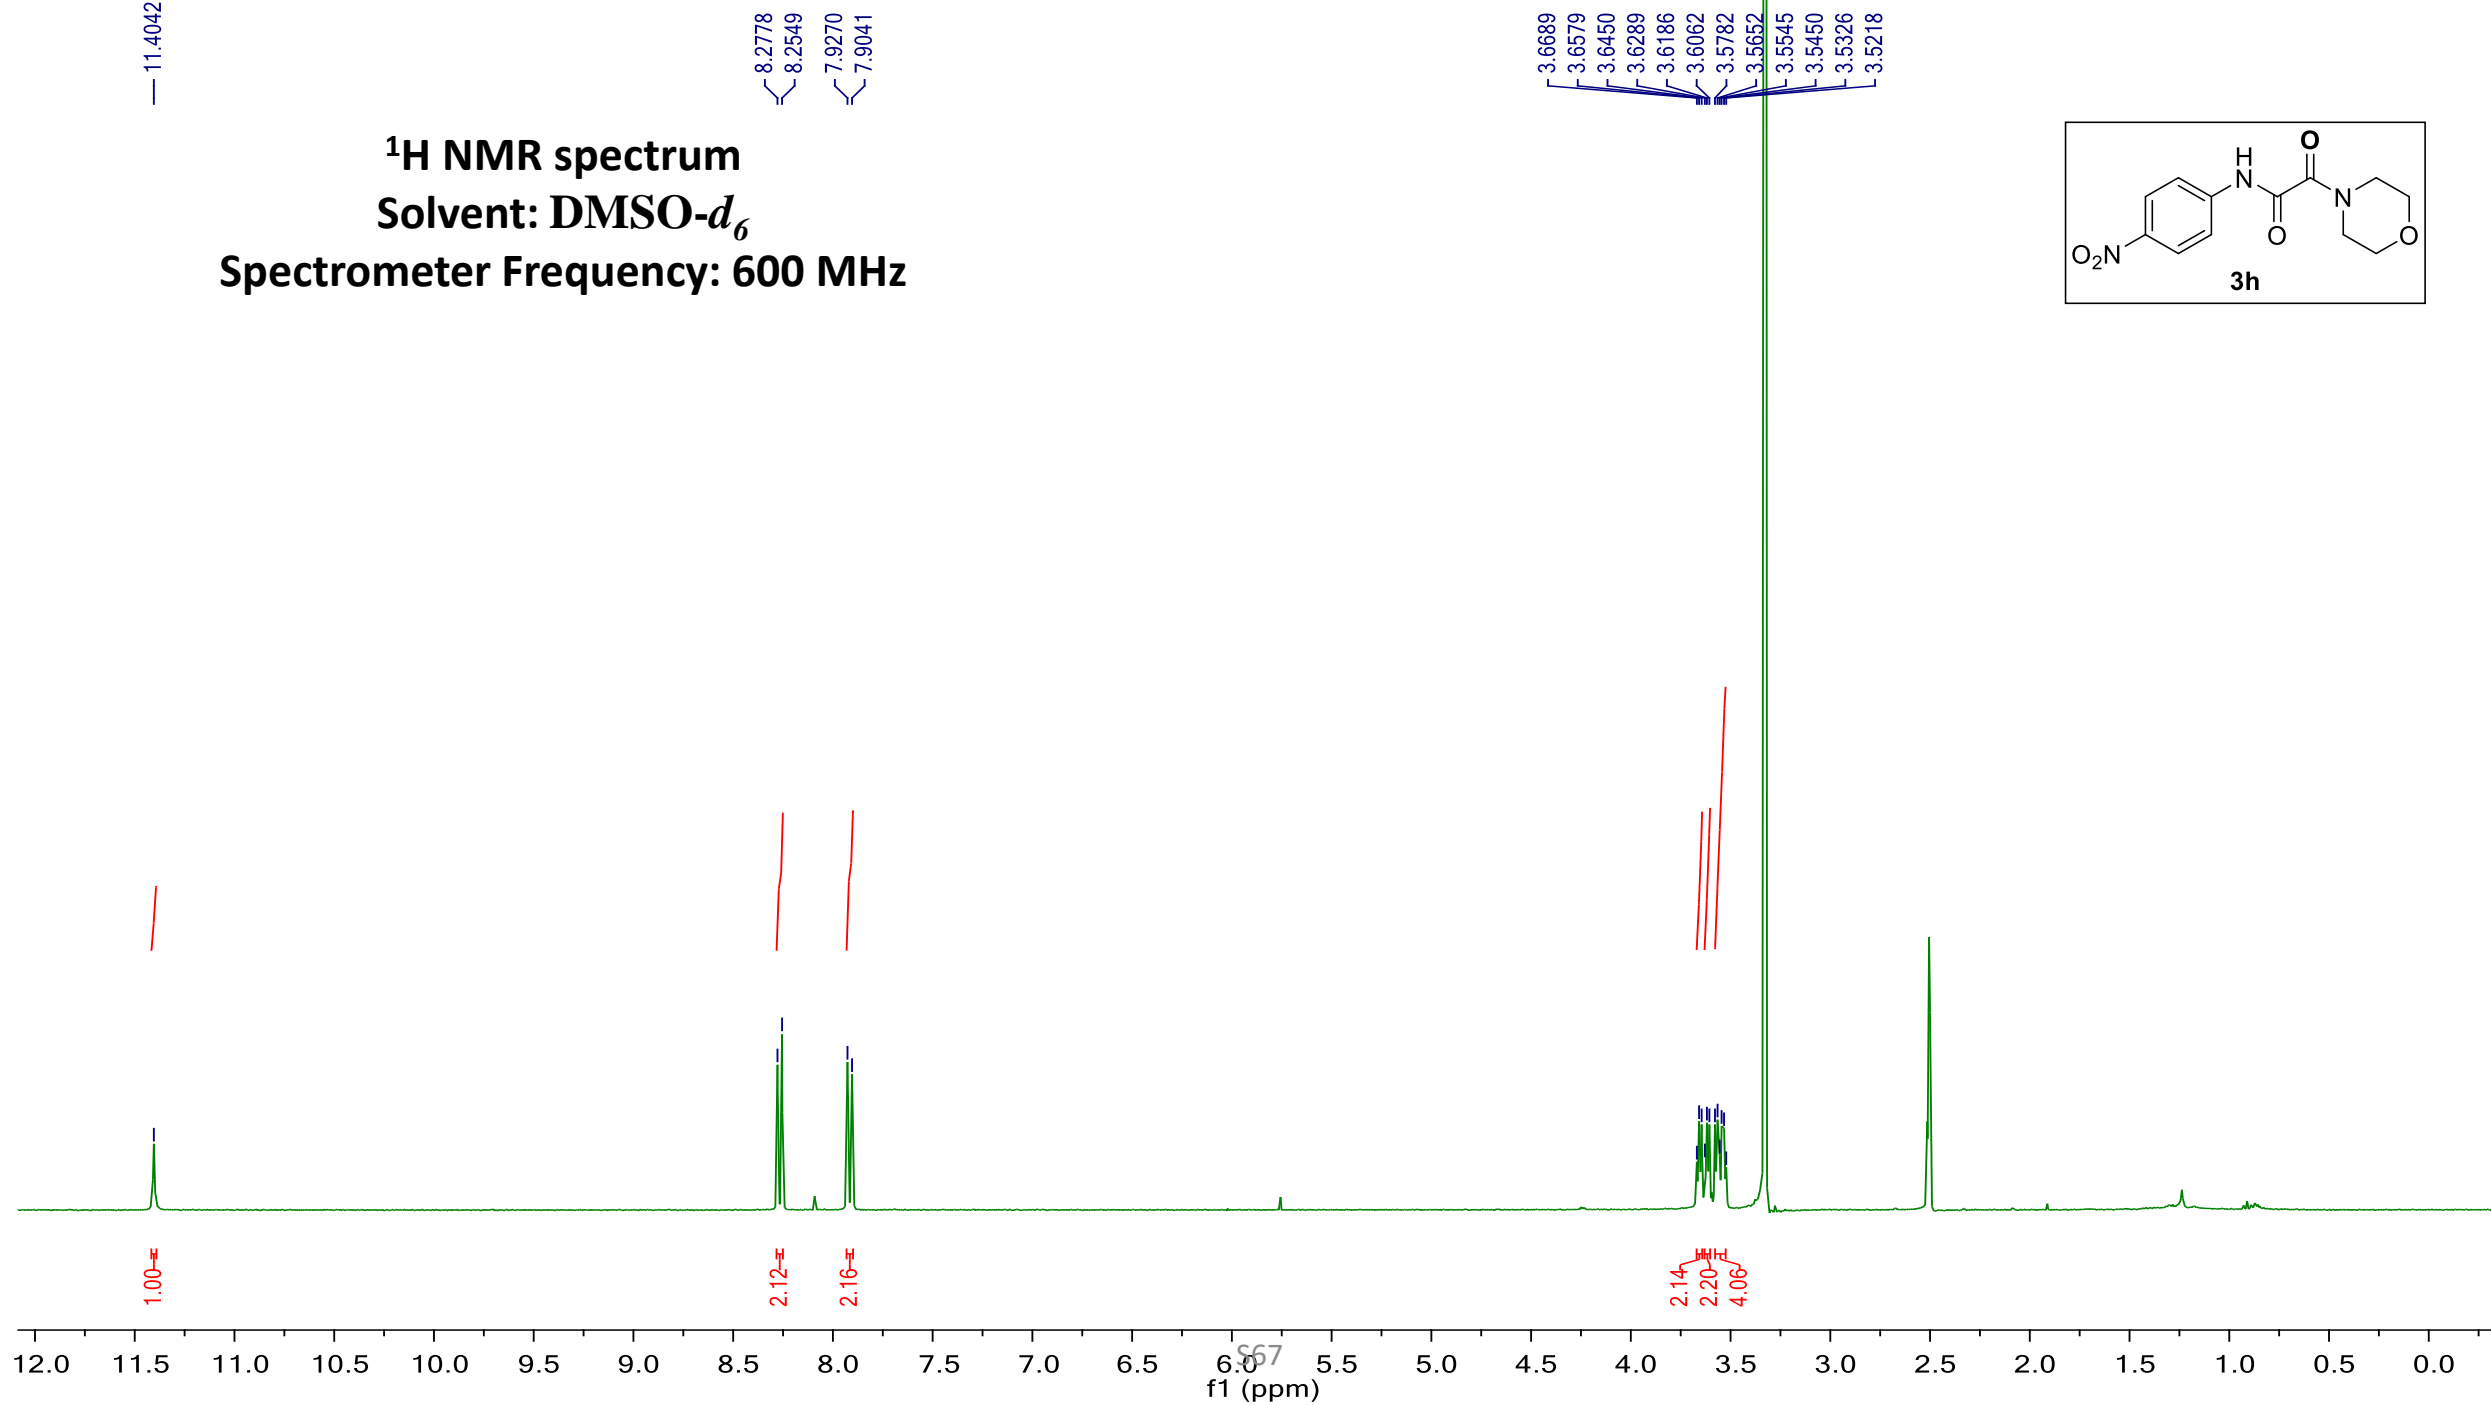

**$^{13}\text{C}$  { $^1\text{H}$ } NMR spectrum**  
**Solvent:  $\text{CDCl}_3$**   
**Spectrometer Frequency: 151 MHz**

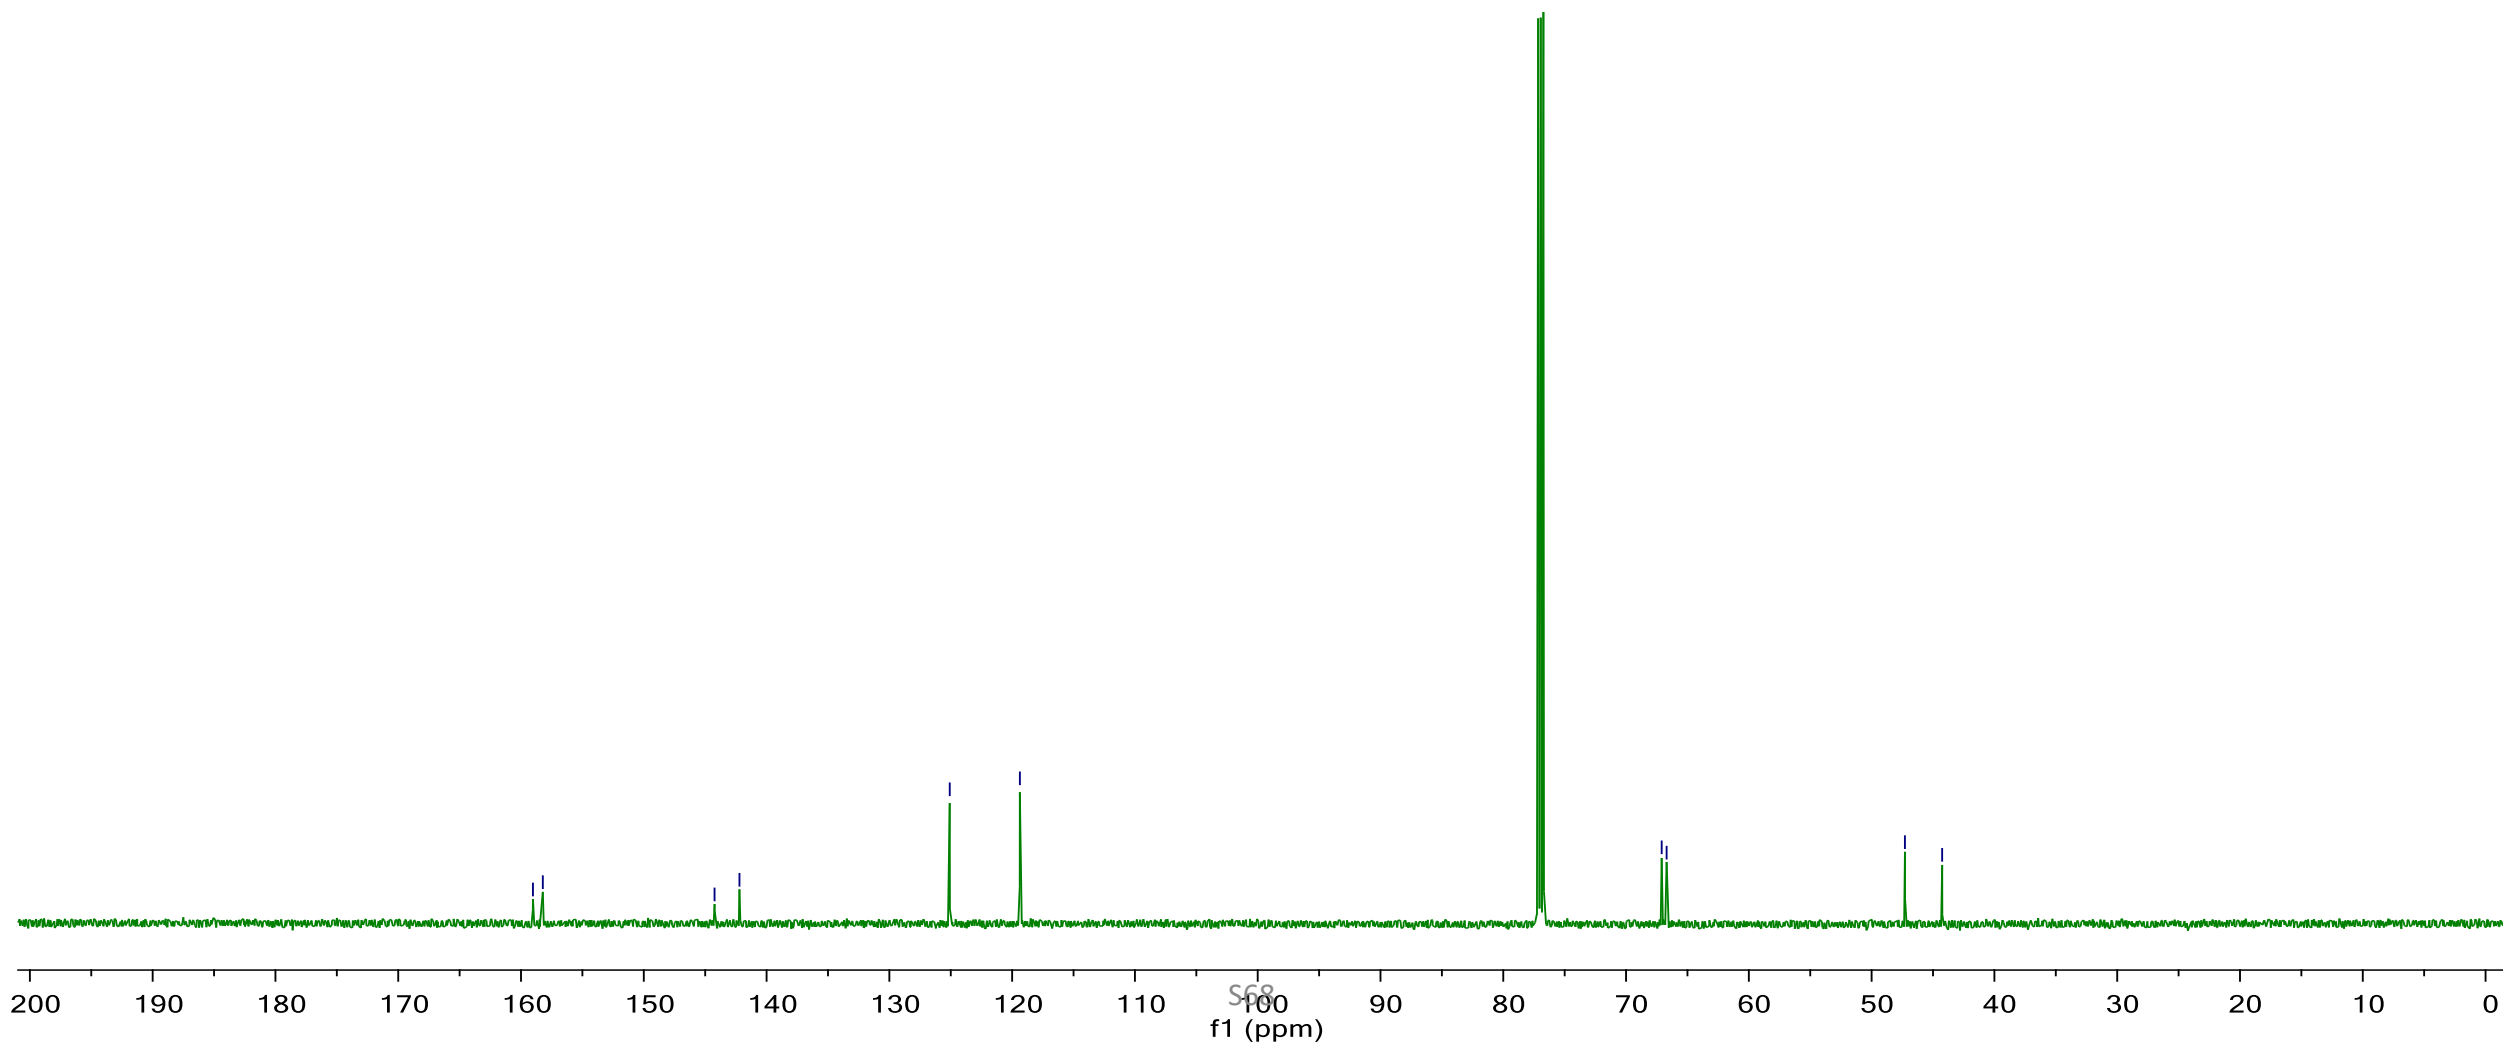

**$^1\text{H}$  NMR spectrum**  
**Solvent:  $\text{DMSO-}d_6$**   
**Spectrometer Frequency: 400 MHz**

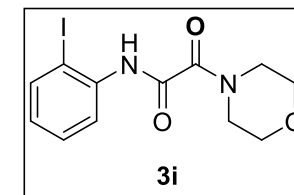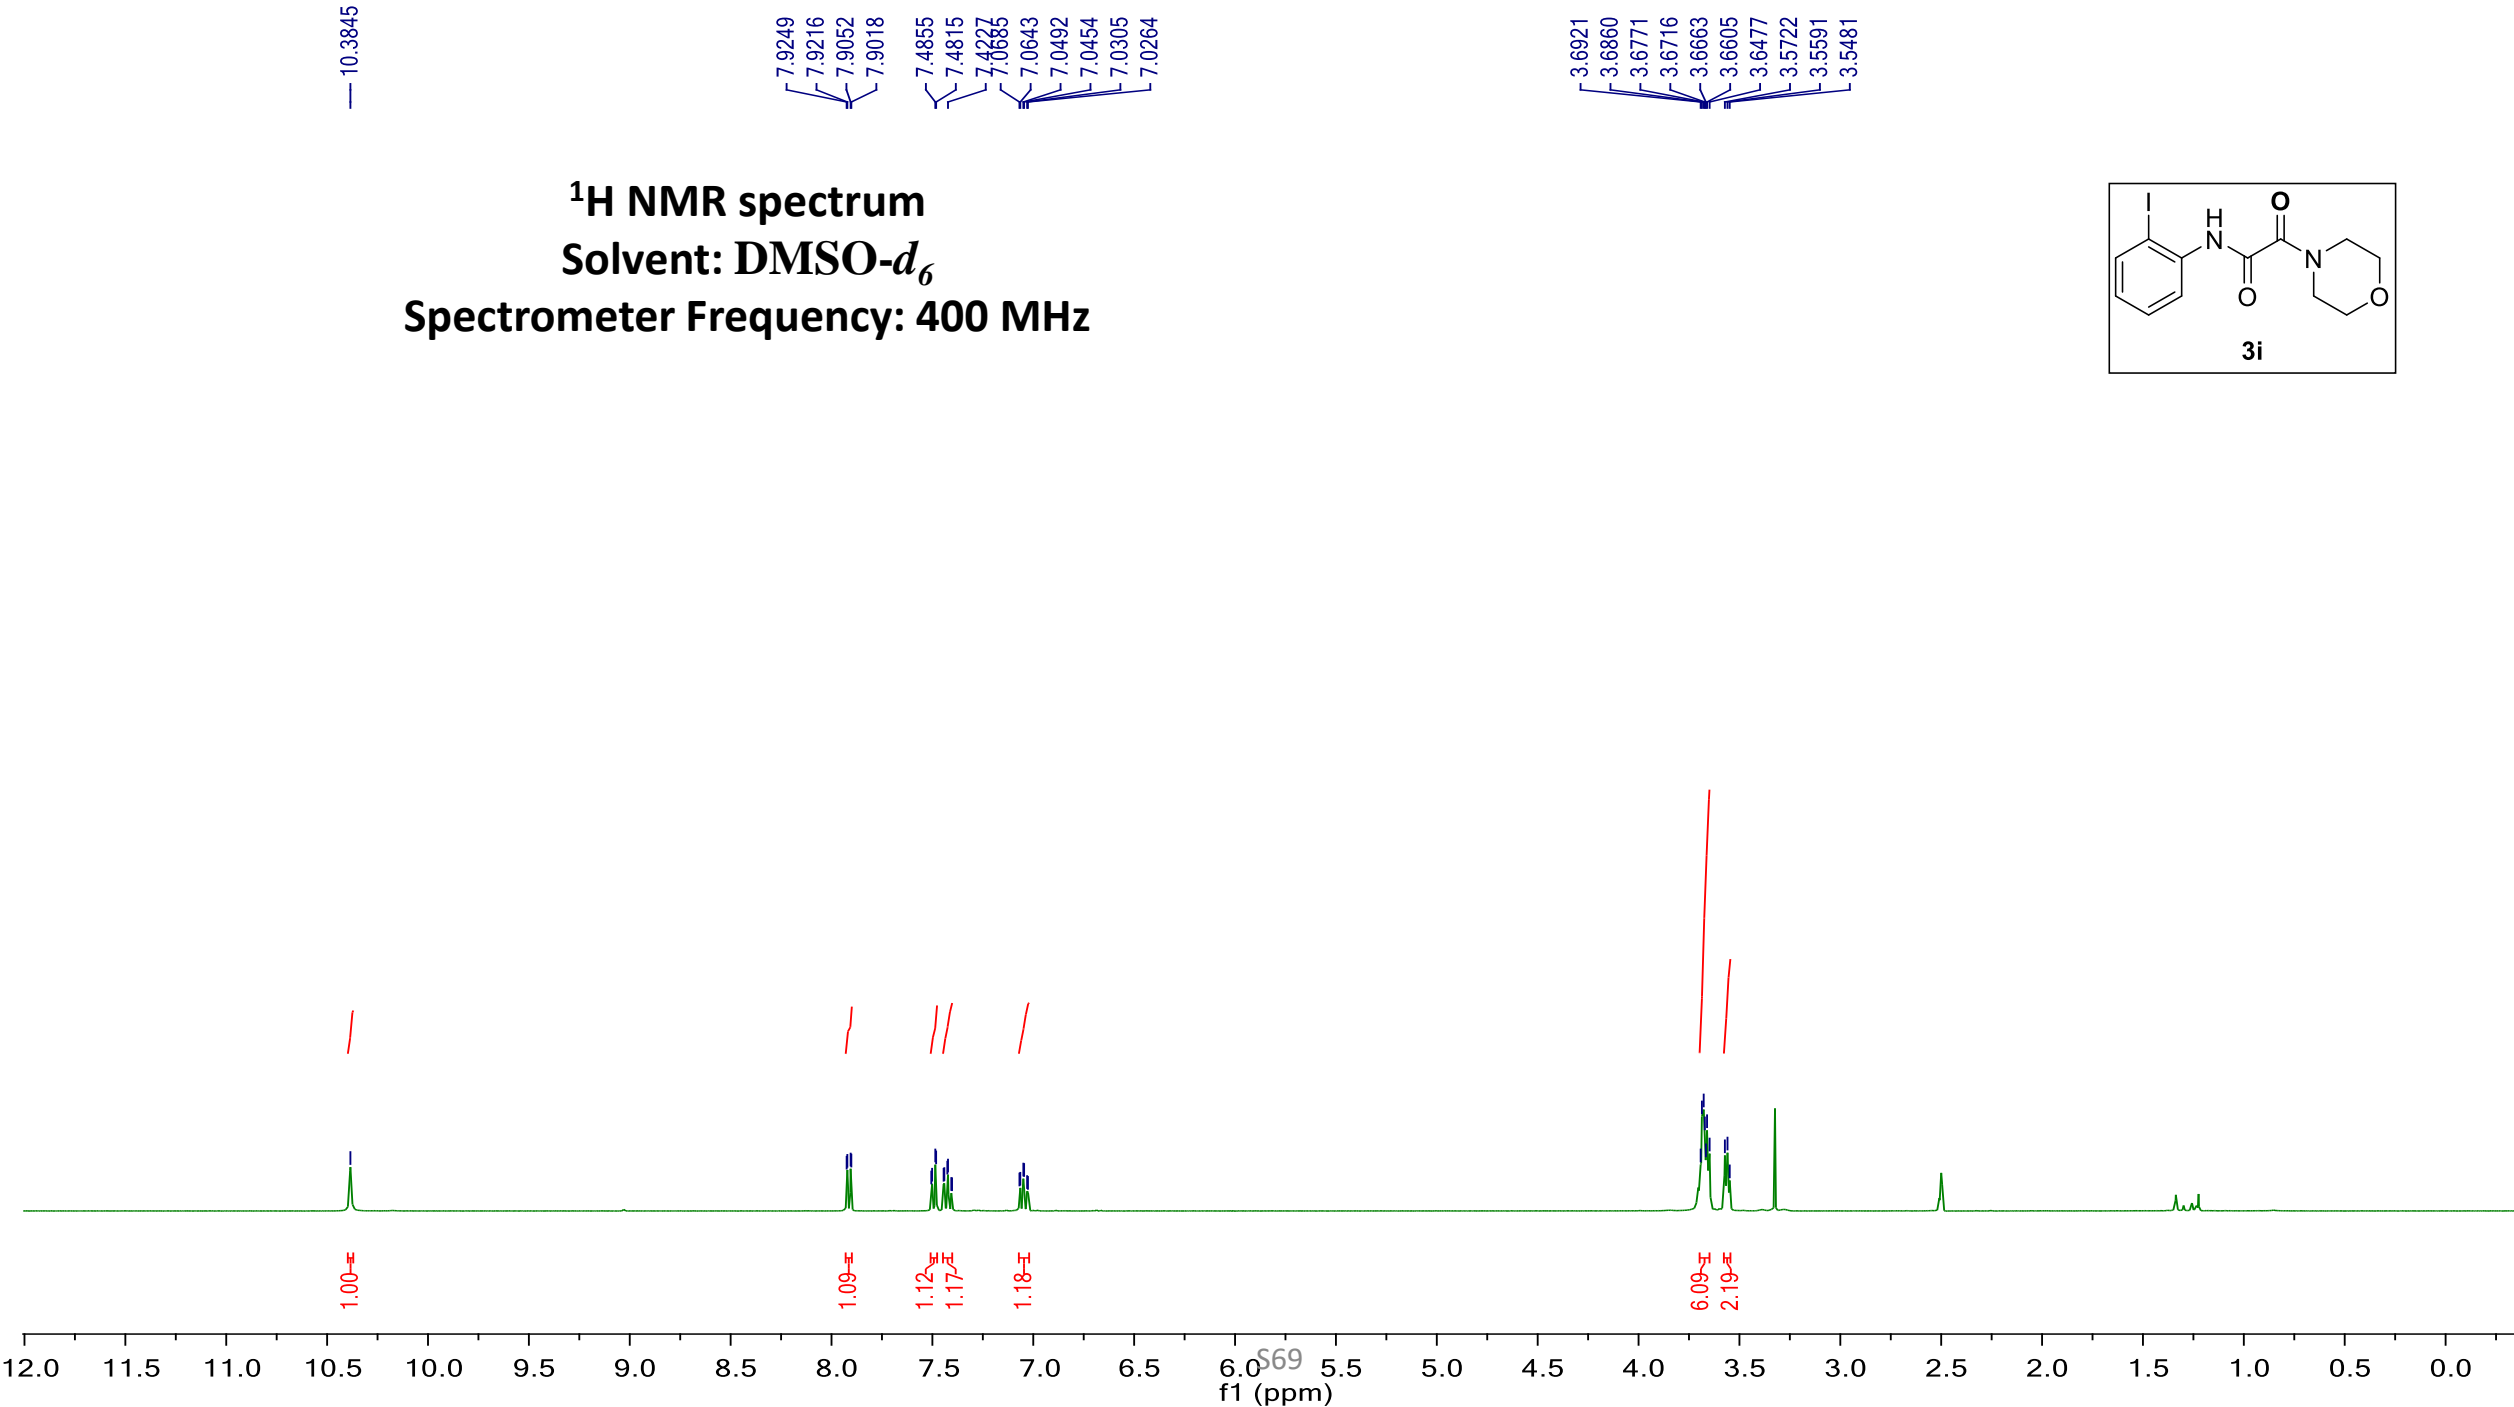

**$^{13}\text{C}$   $\{^1\text{H}\}$  NMR spectrum**  
**Solvent: DMSO- $d_6$**   
**Spectrometer Frequency: 100 MHz**

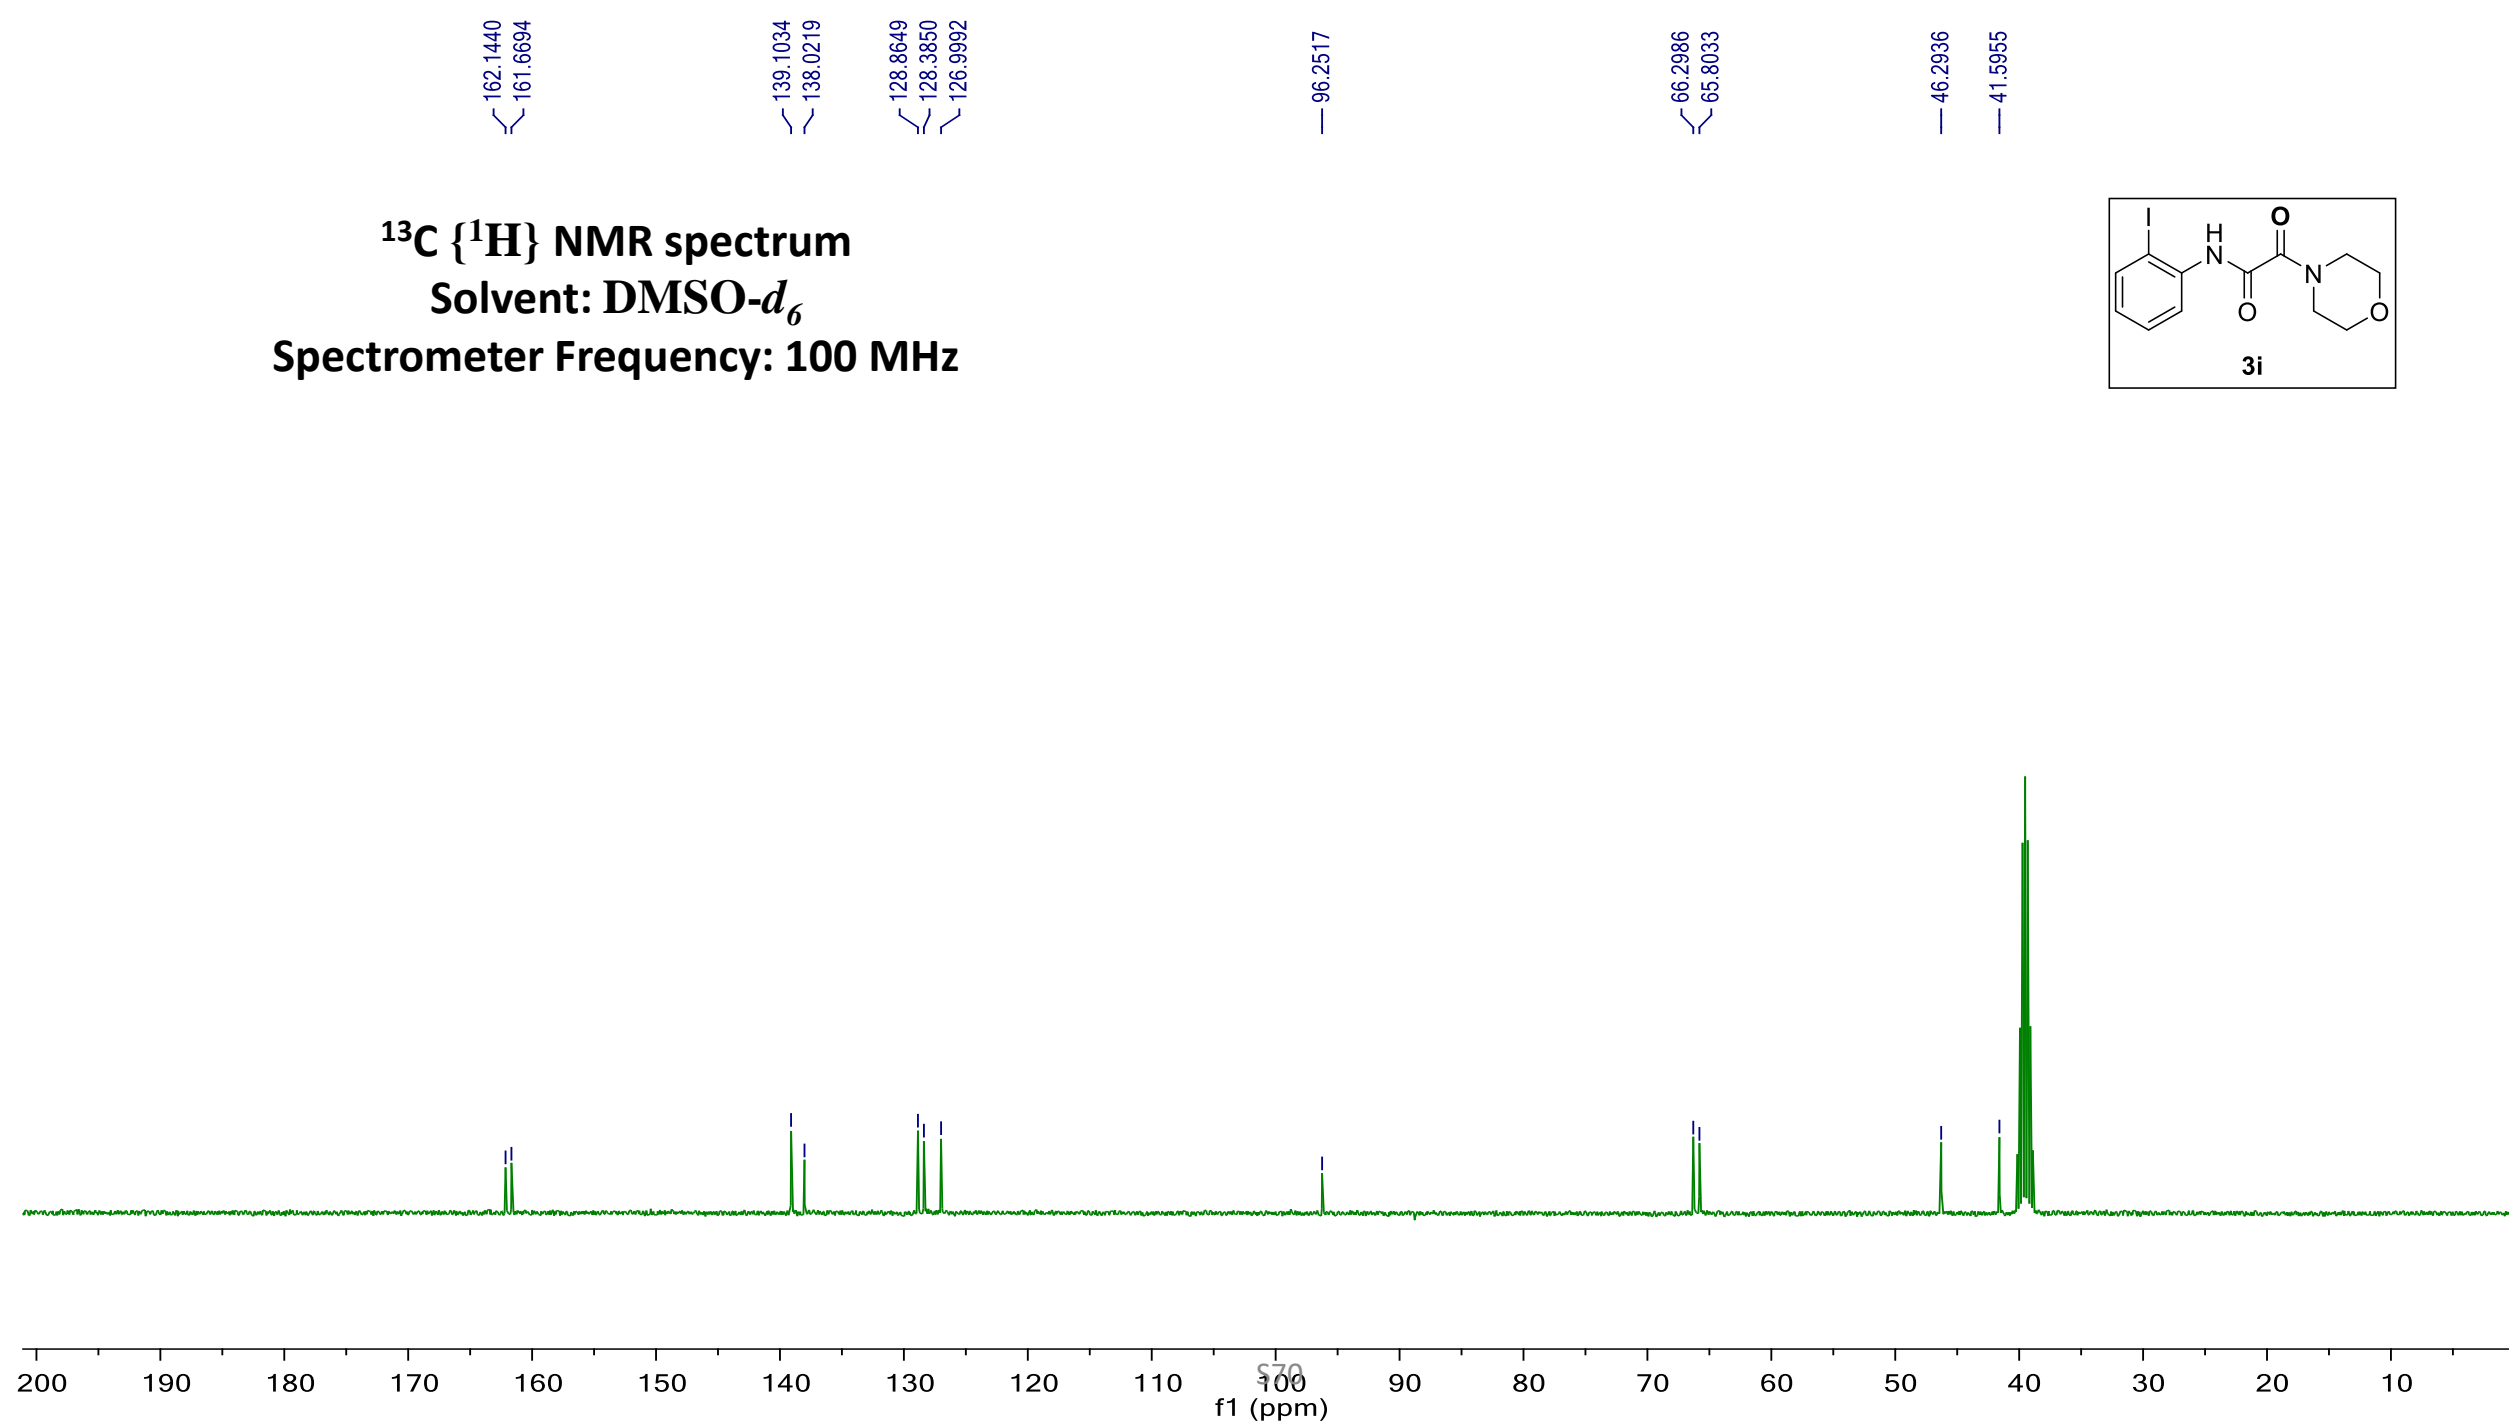

**$^1\text{H}$  NMR spectrum**  
**Solvent: DMSO- $d_6$**   
**Spectrometer Frequency: 400 MHz**

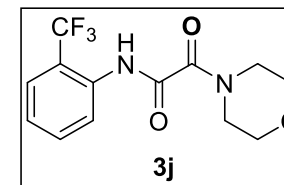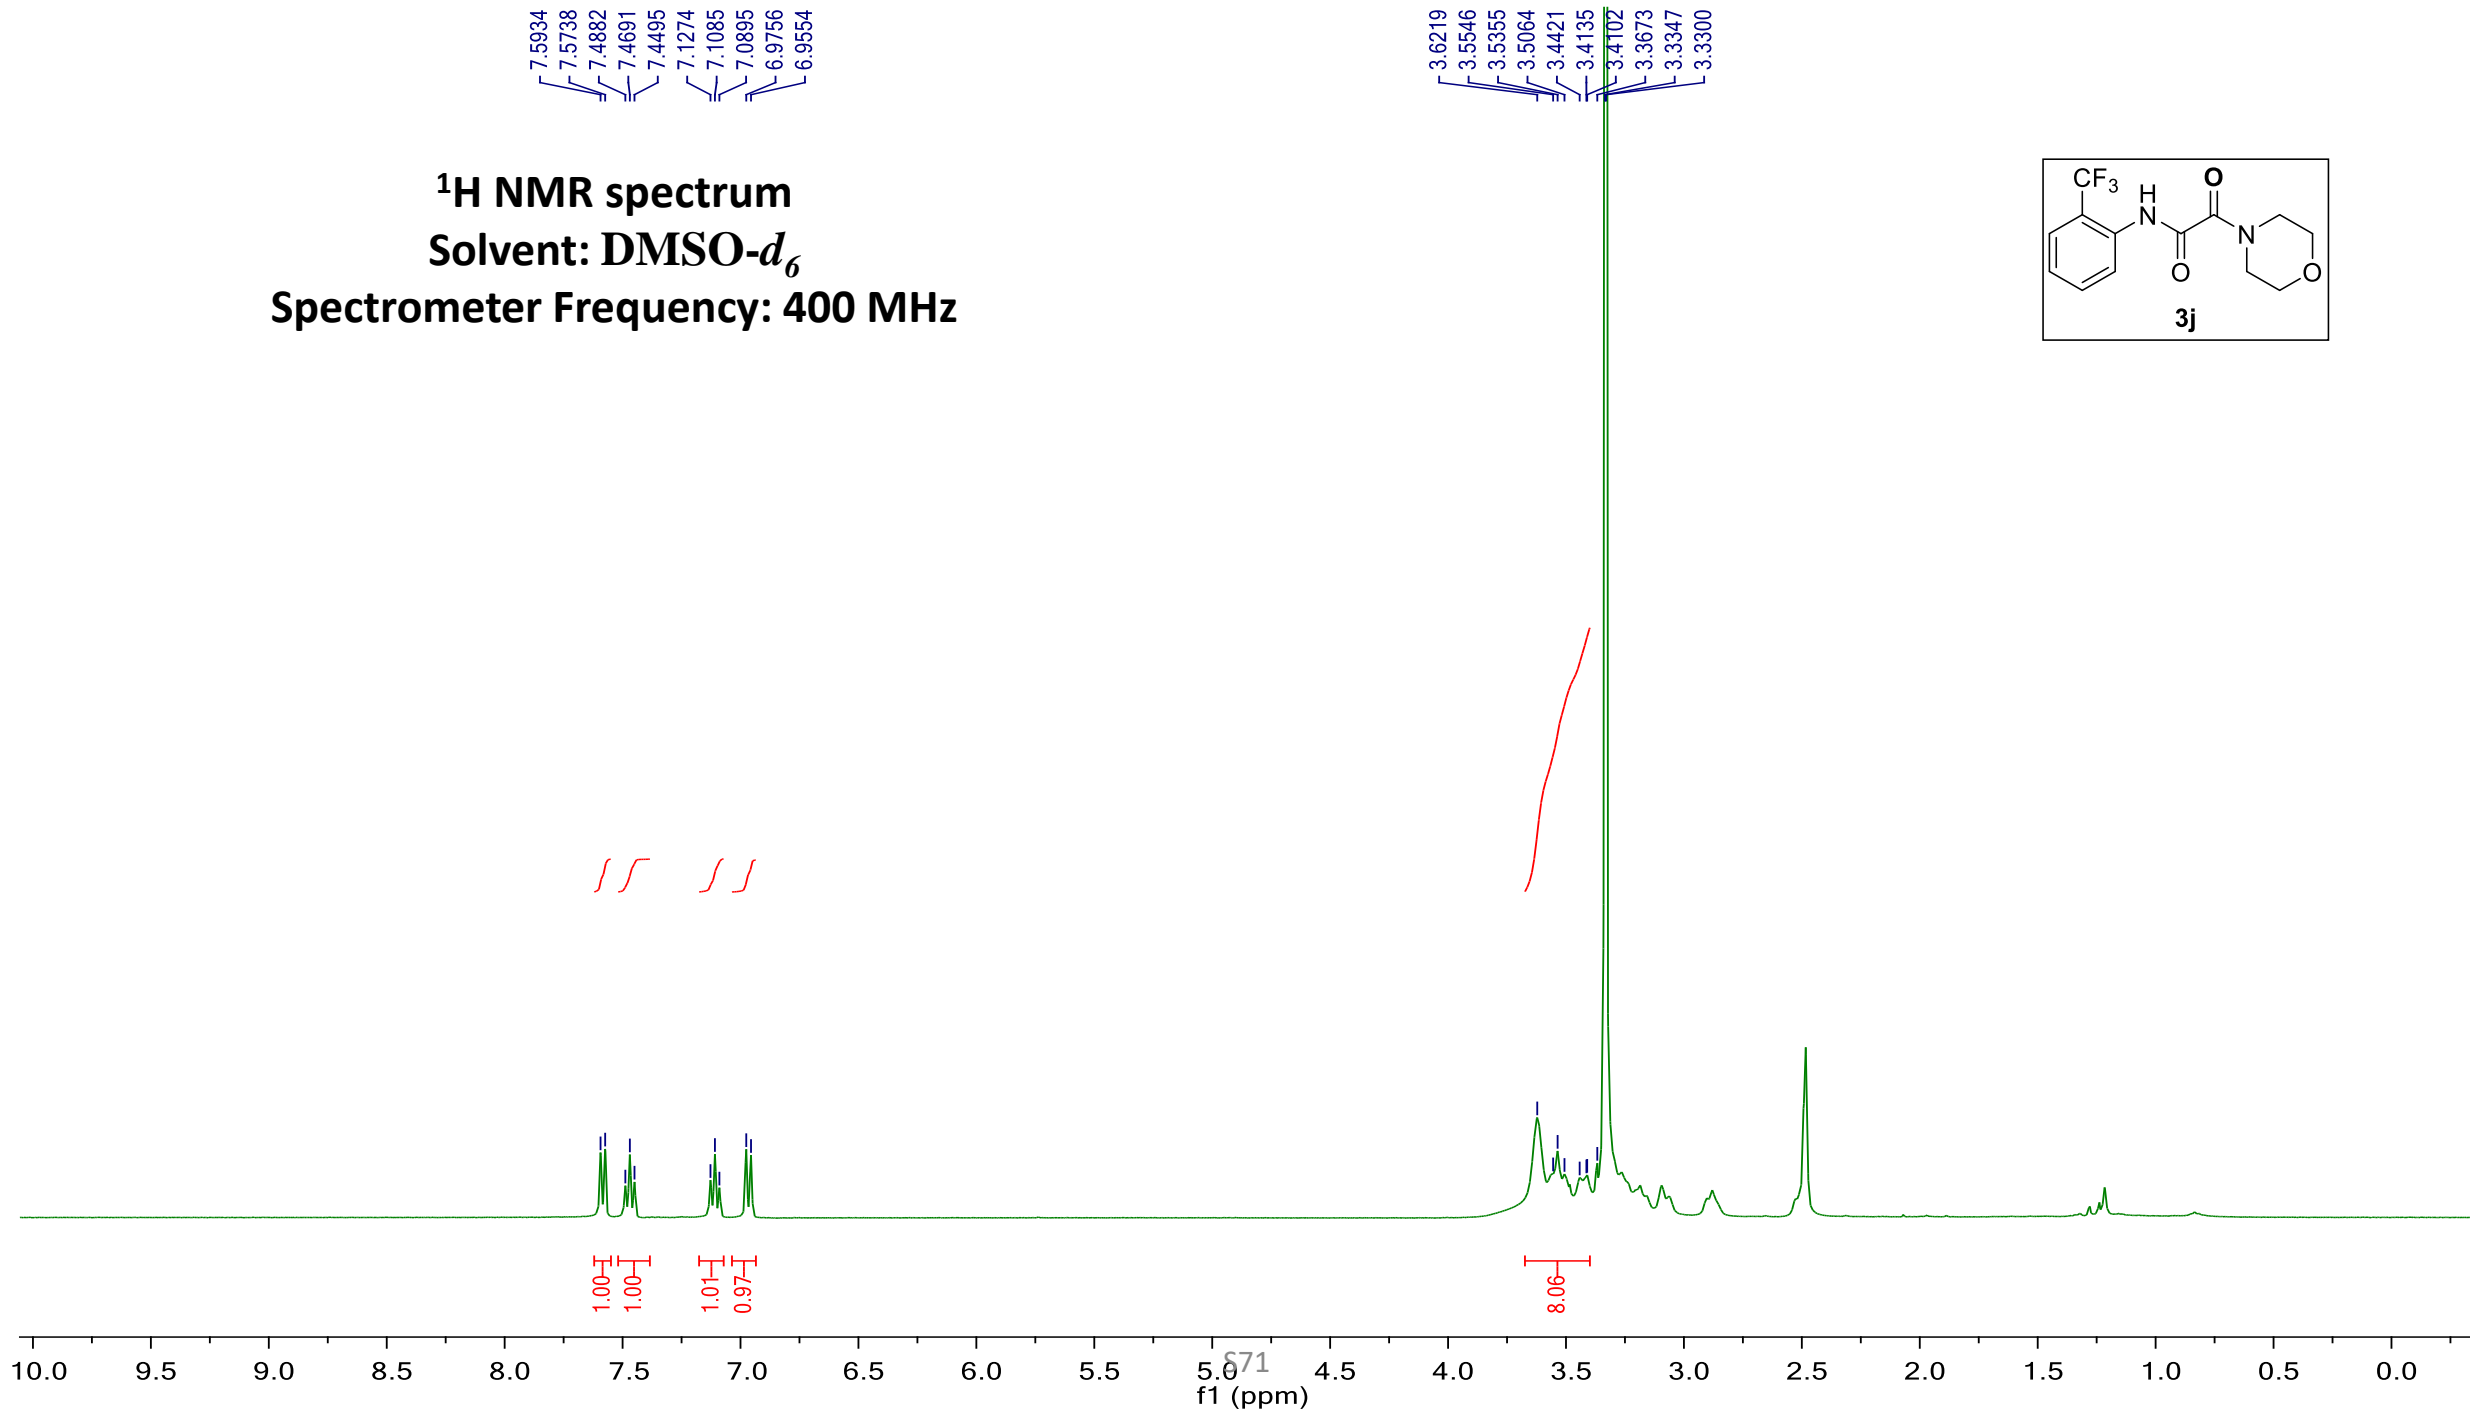

4j-aj-cf3 - dmso  
single pulse decoupled gated NOE

**$^{13}\text{C}$   $\{^1\text{H}\}$  NMR spectrum**  
**Solvent: DMSO- $d_6$**   
**Spectrometer Frequency: 100 MHz**

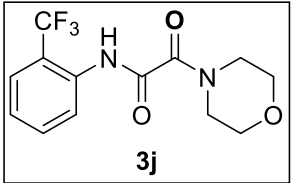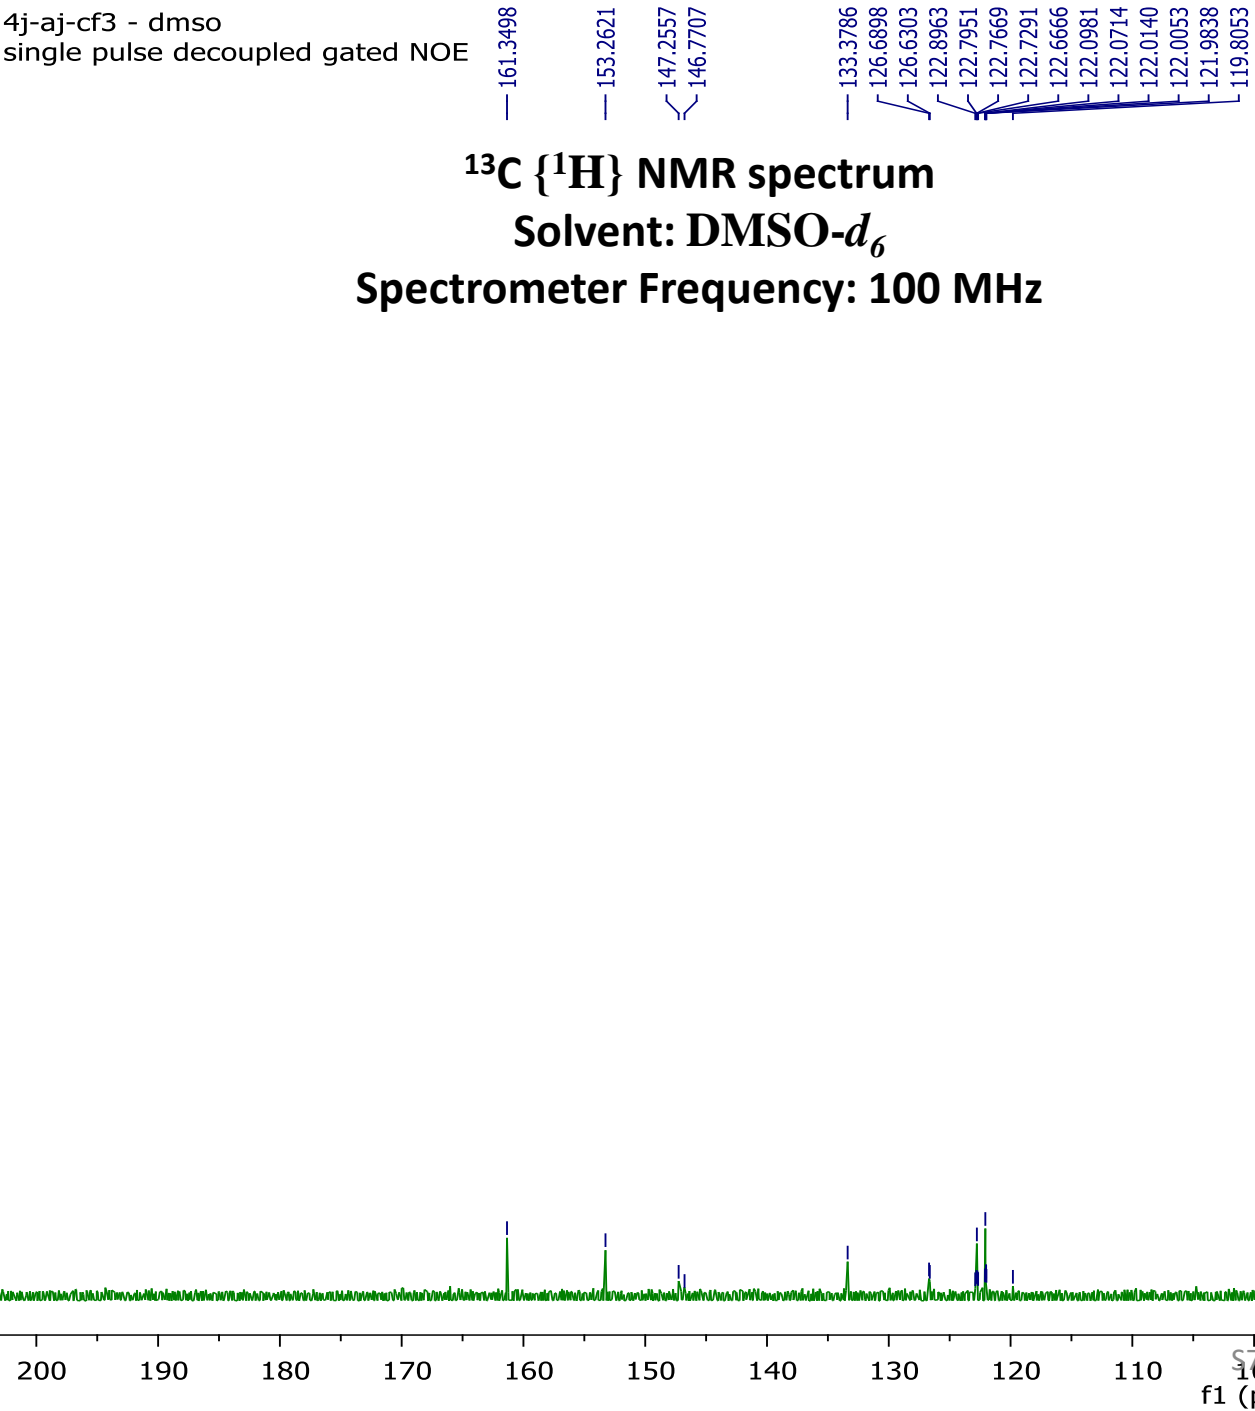

**$^{19}\text{F}\{^1\text{H}\}$  NMR spectrum**  
**Solvent: DMSO- $d_6$**   
**Spectrometer Frequency: 376 MHz**

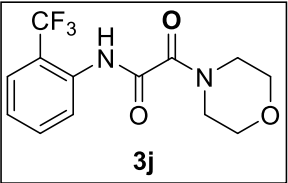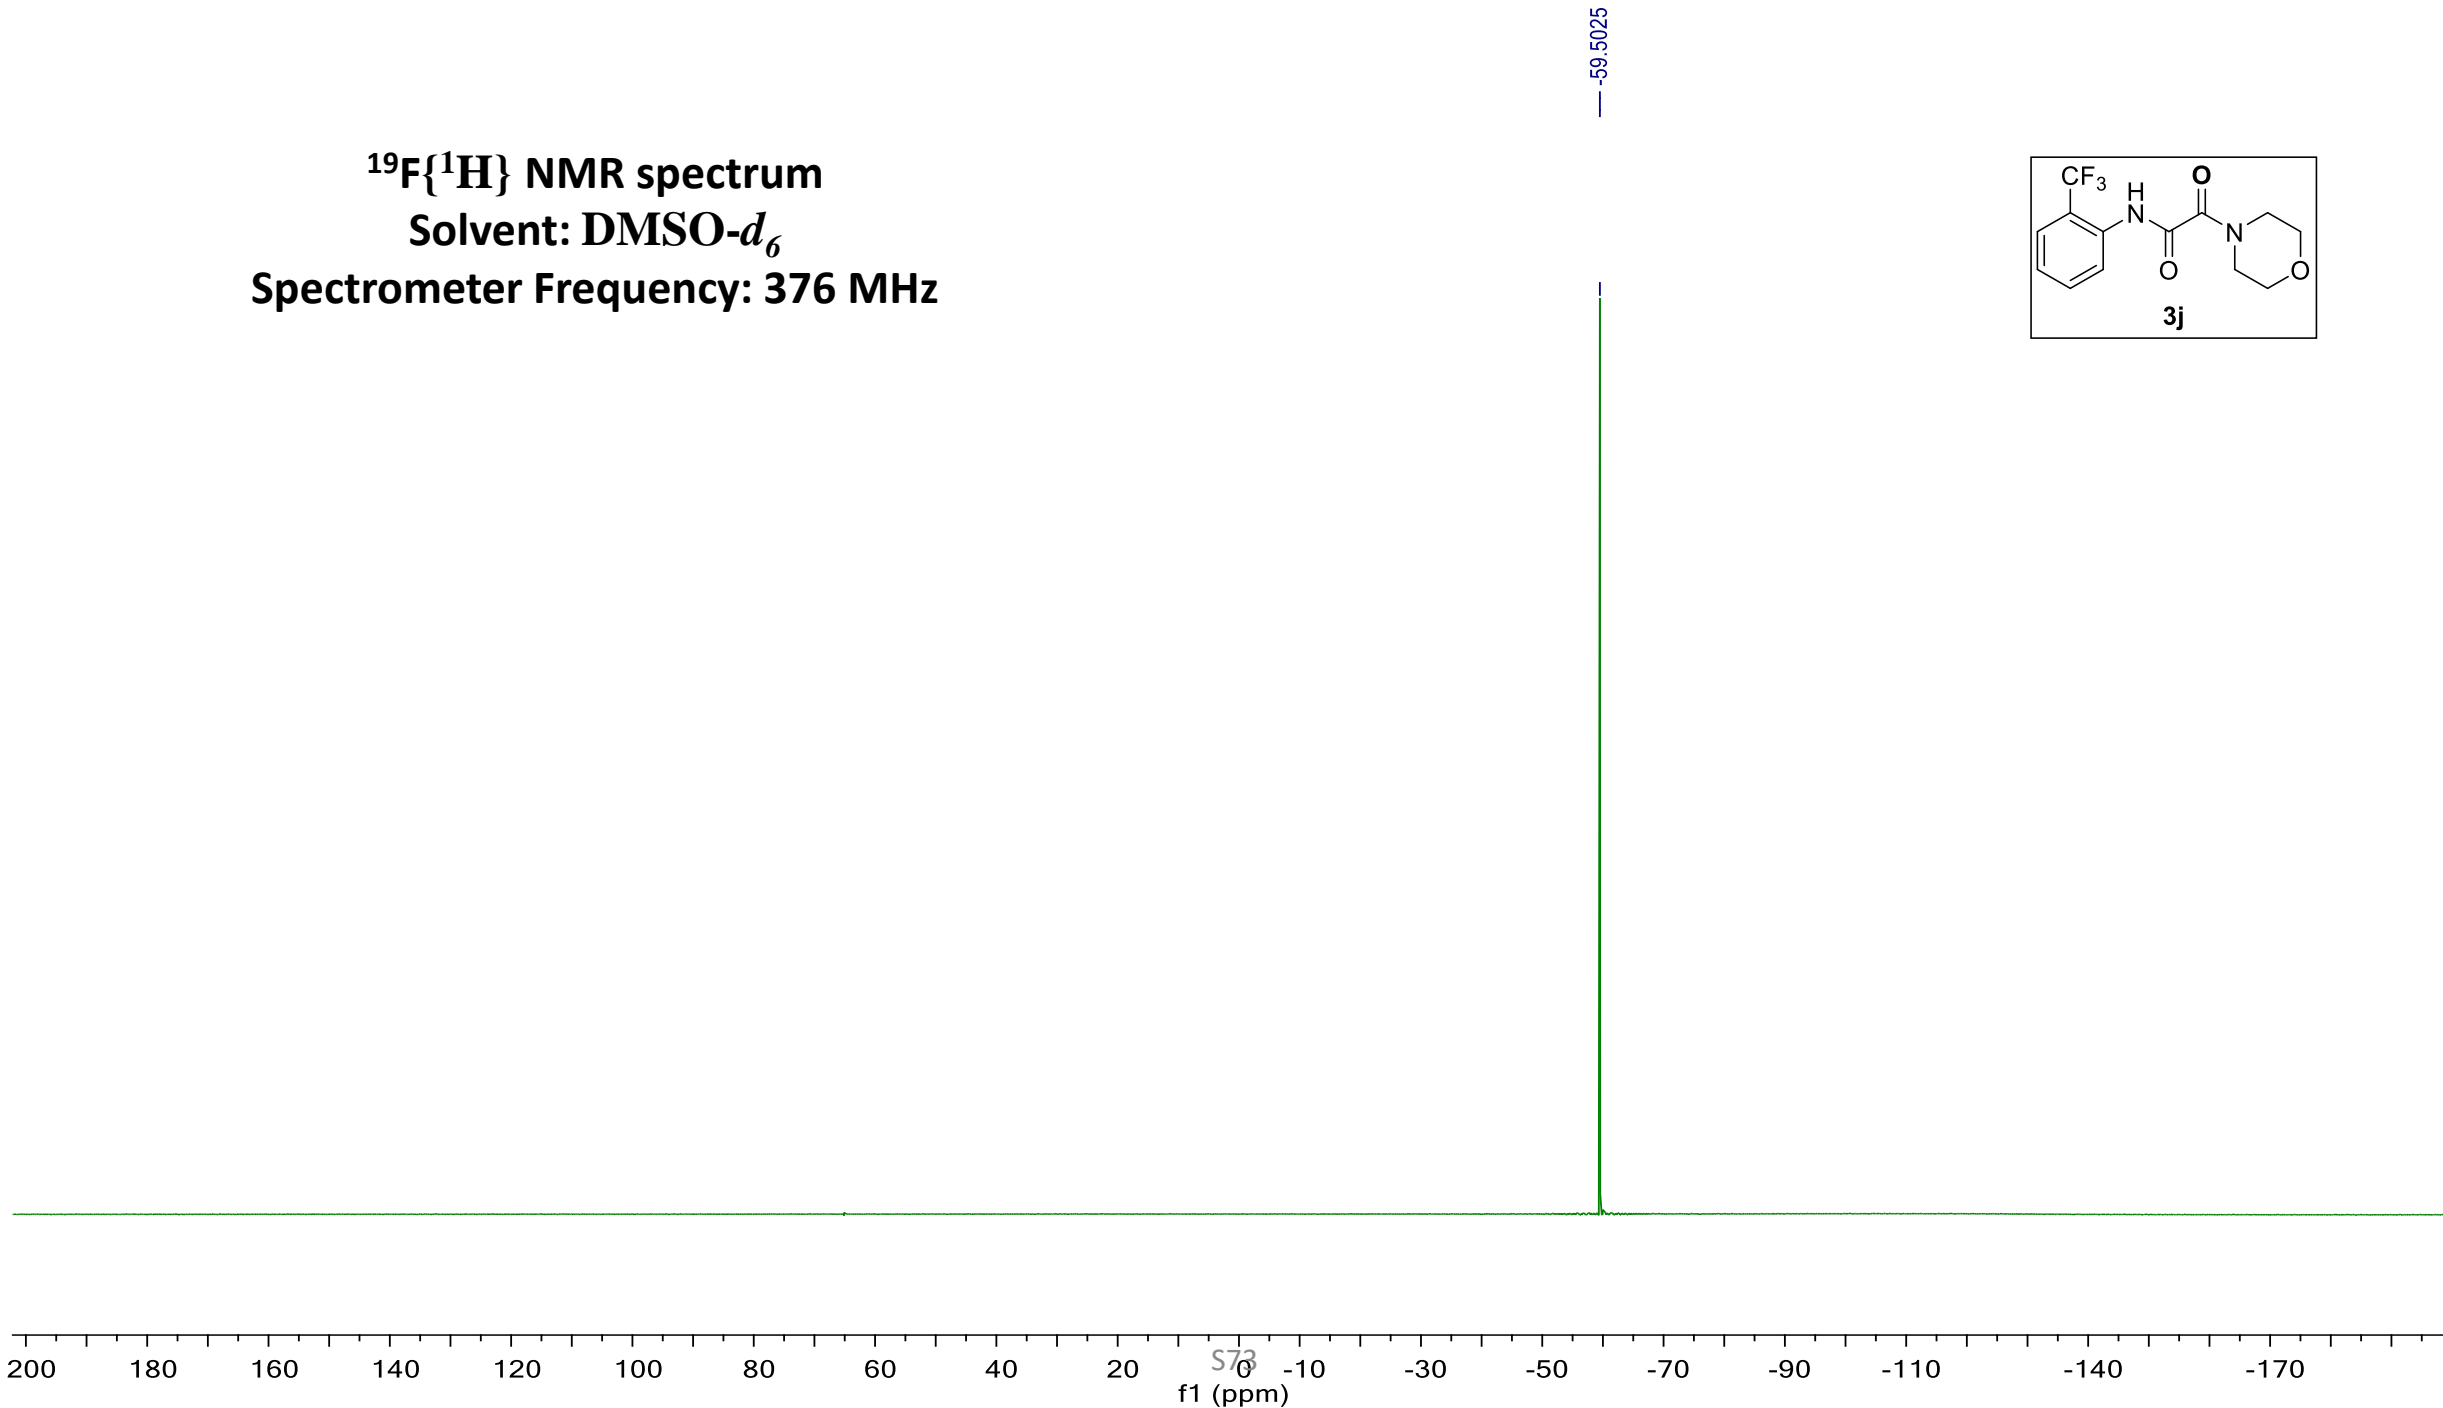

**$^1\text{H}$  NMR spectrum**  
**Solvent:  $\text{CDCl}_3$**   
**Spectrometer Frequency: 400 MHz**

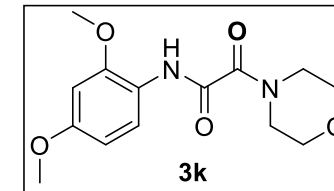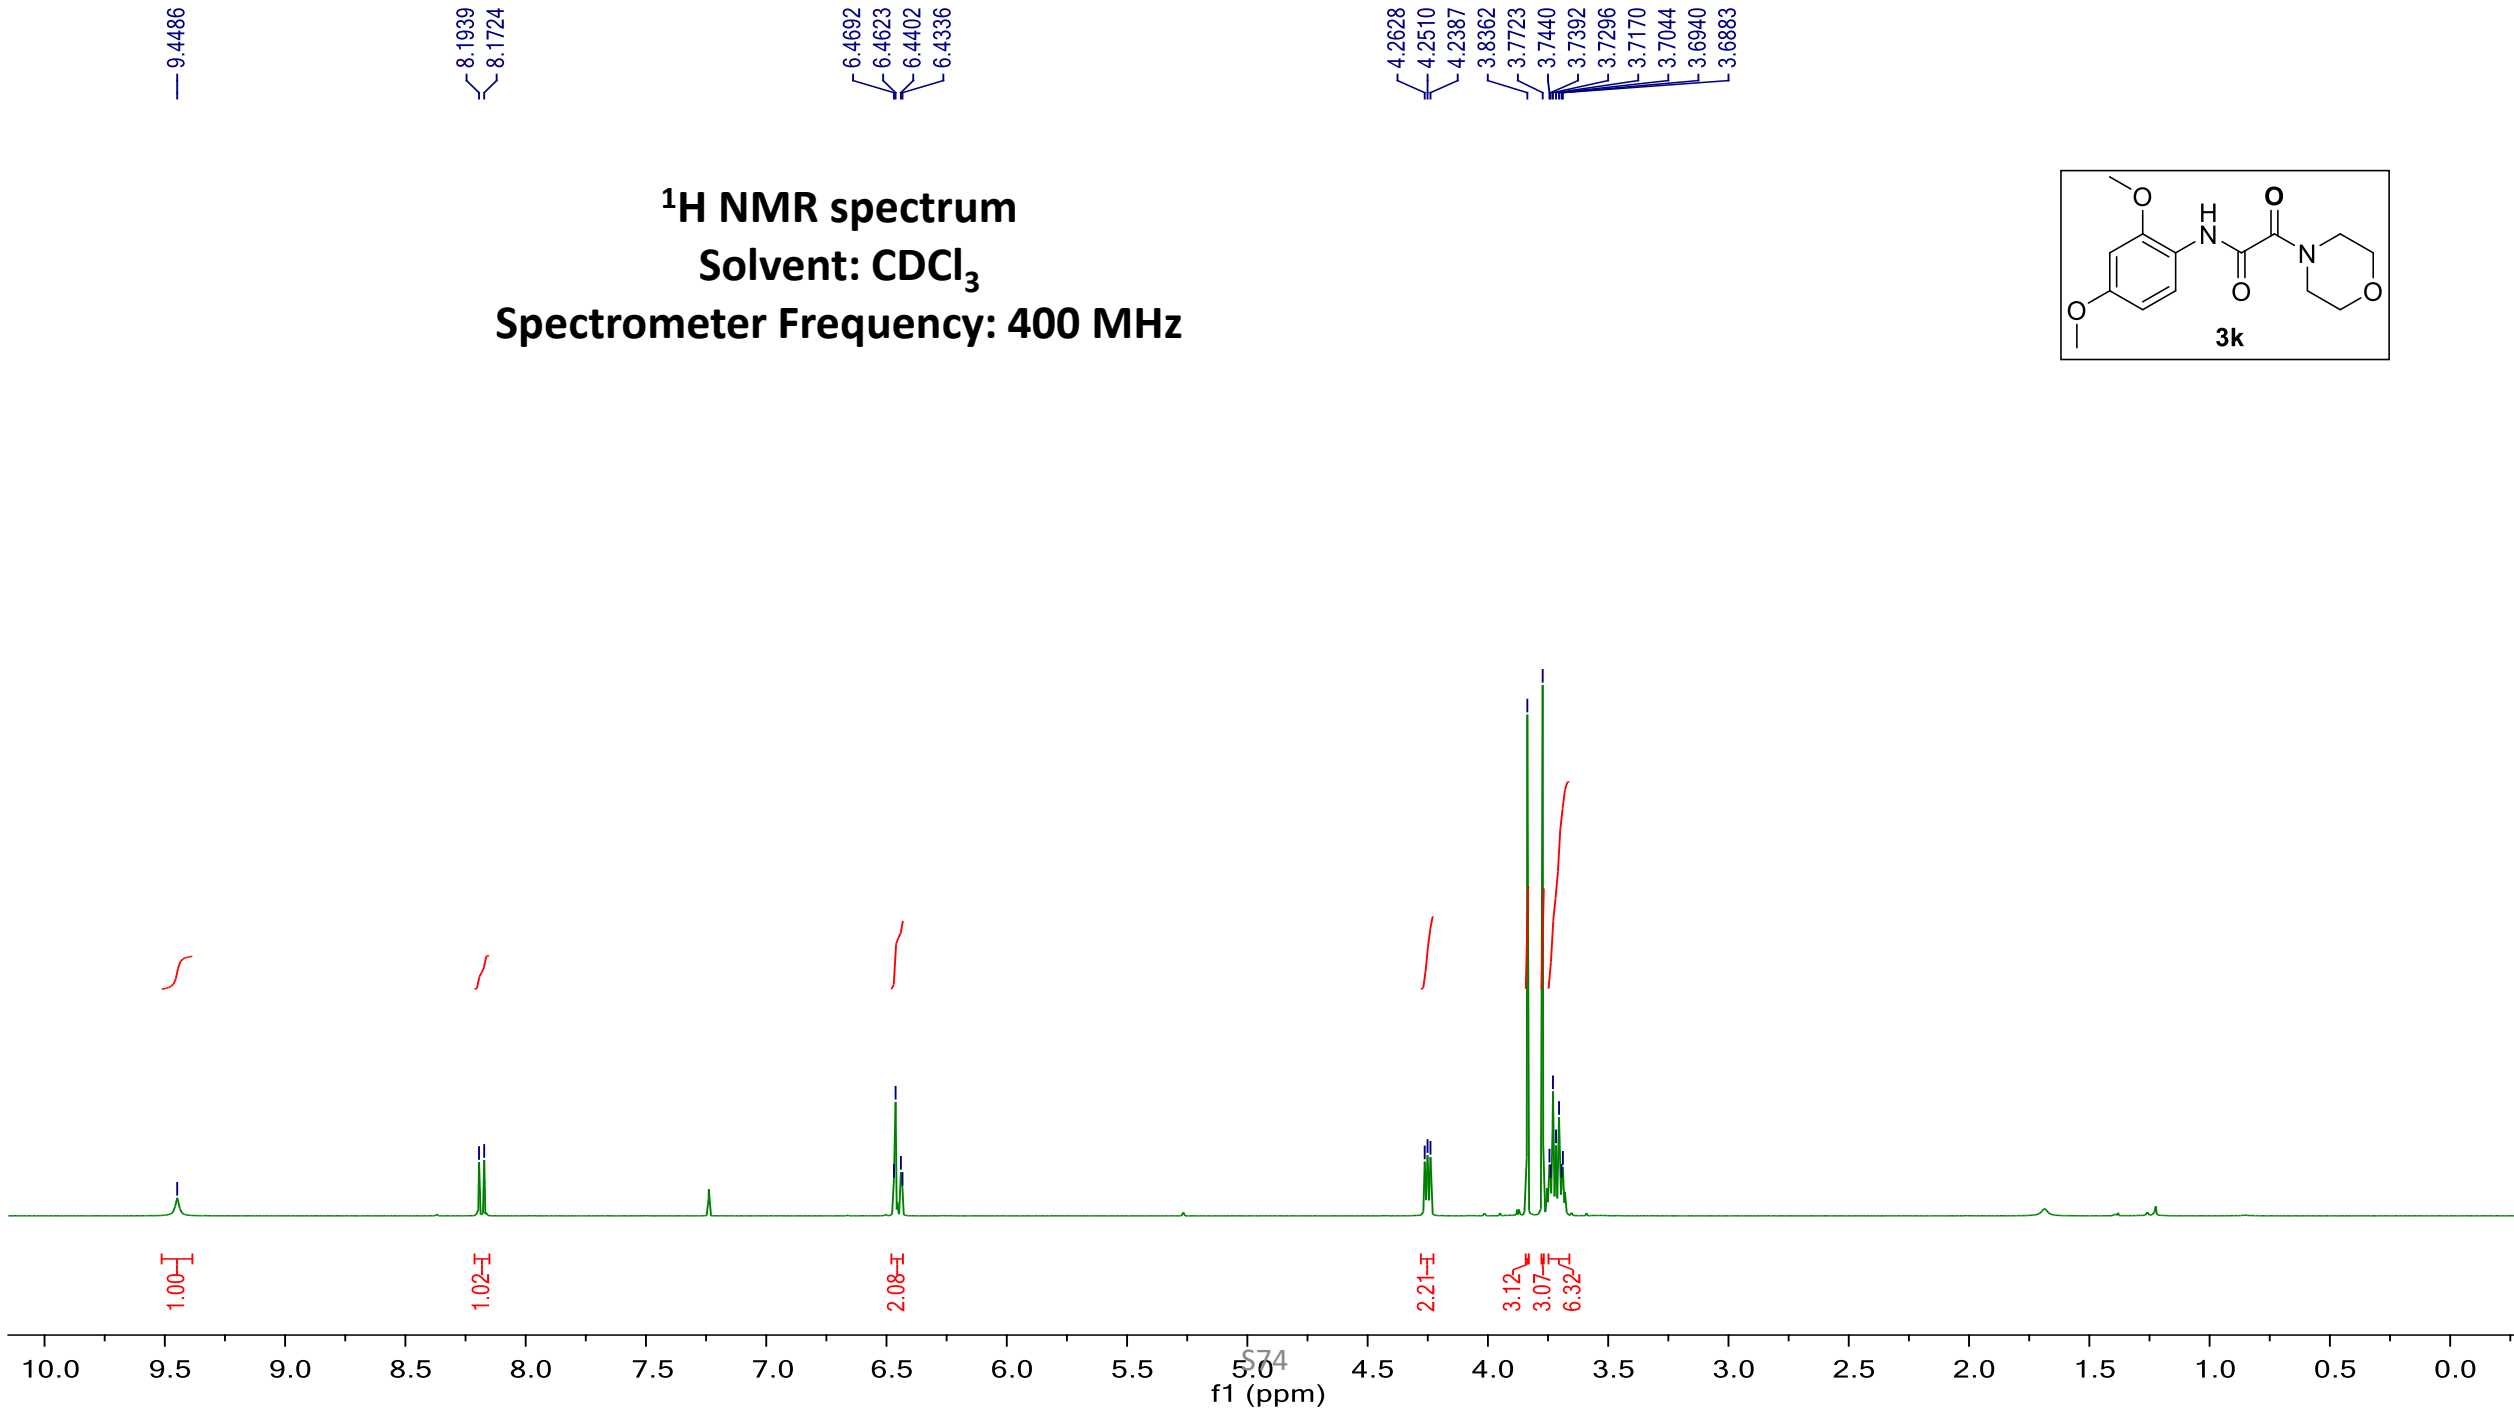

**$^{13}\text{C} \{^1\text{H}\}$  NMR spectrum**  
**Solvent:  $\text{CDCl}_3$**   
**Spectrometer Frequency: 100 MHz**

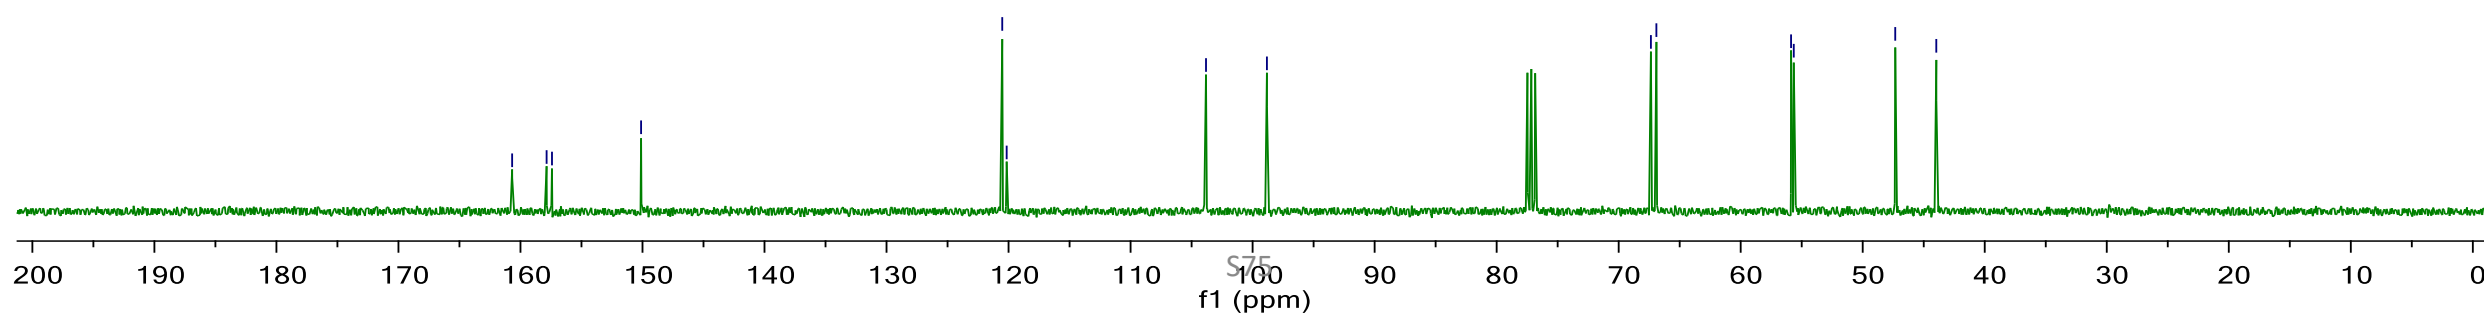

**<sup>1</sup>H NMR spectrum**  
**Solvent: CDCl<sub>3</sub>**  
**Spectrometer Frequency: 400 MHz**

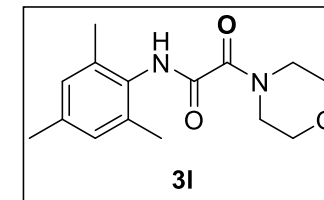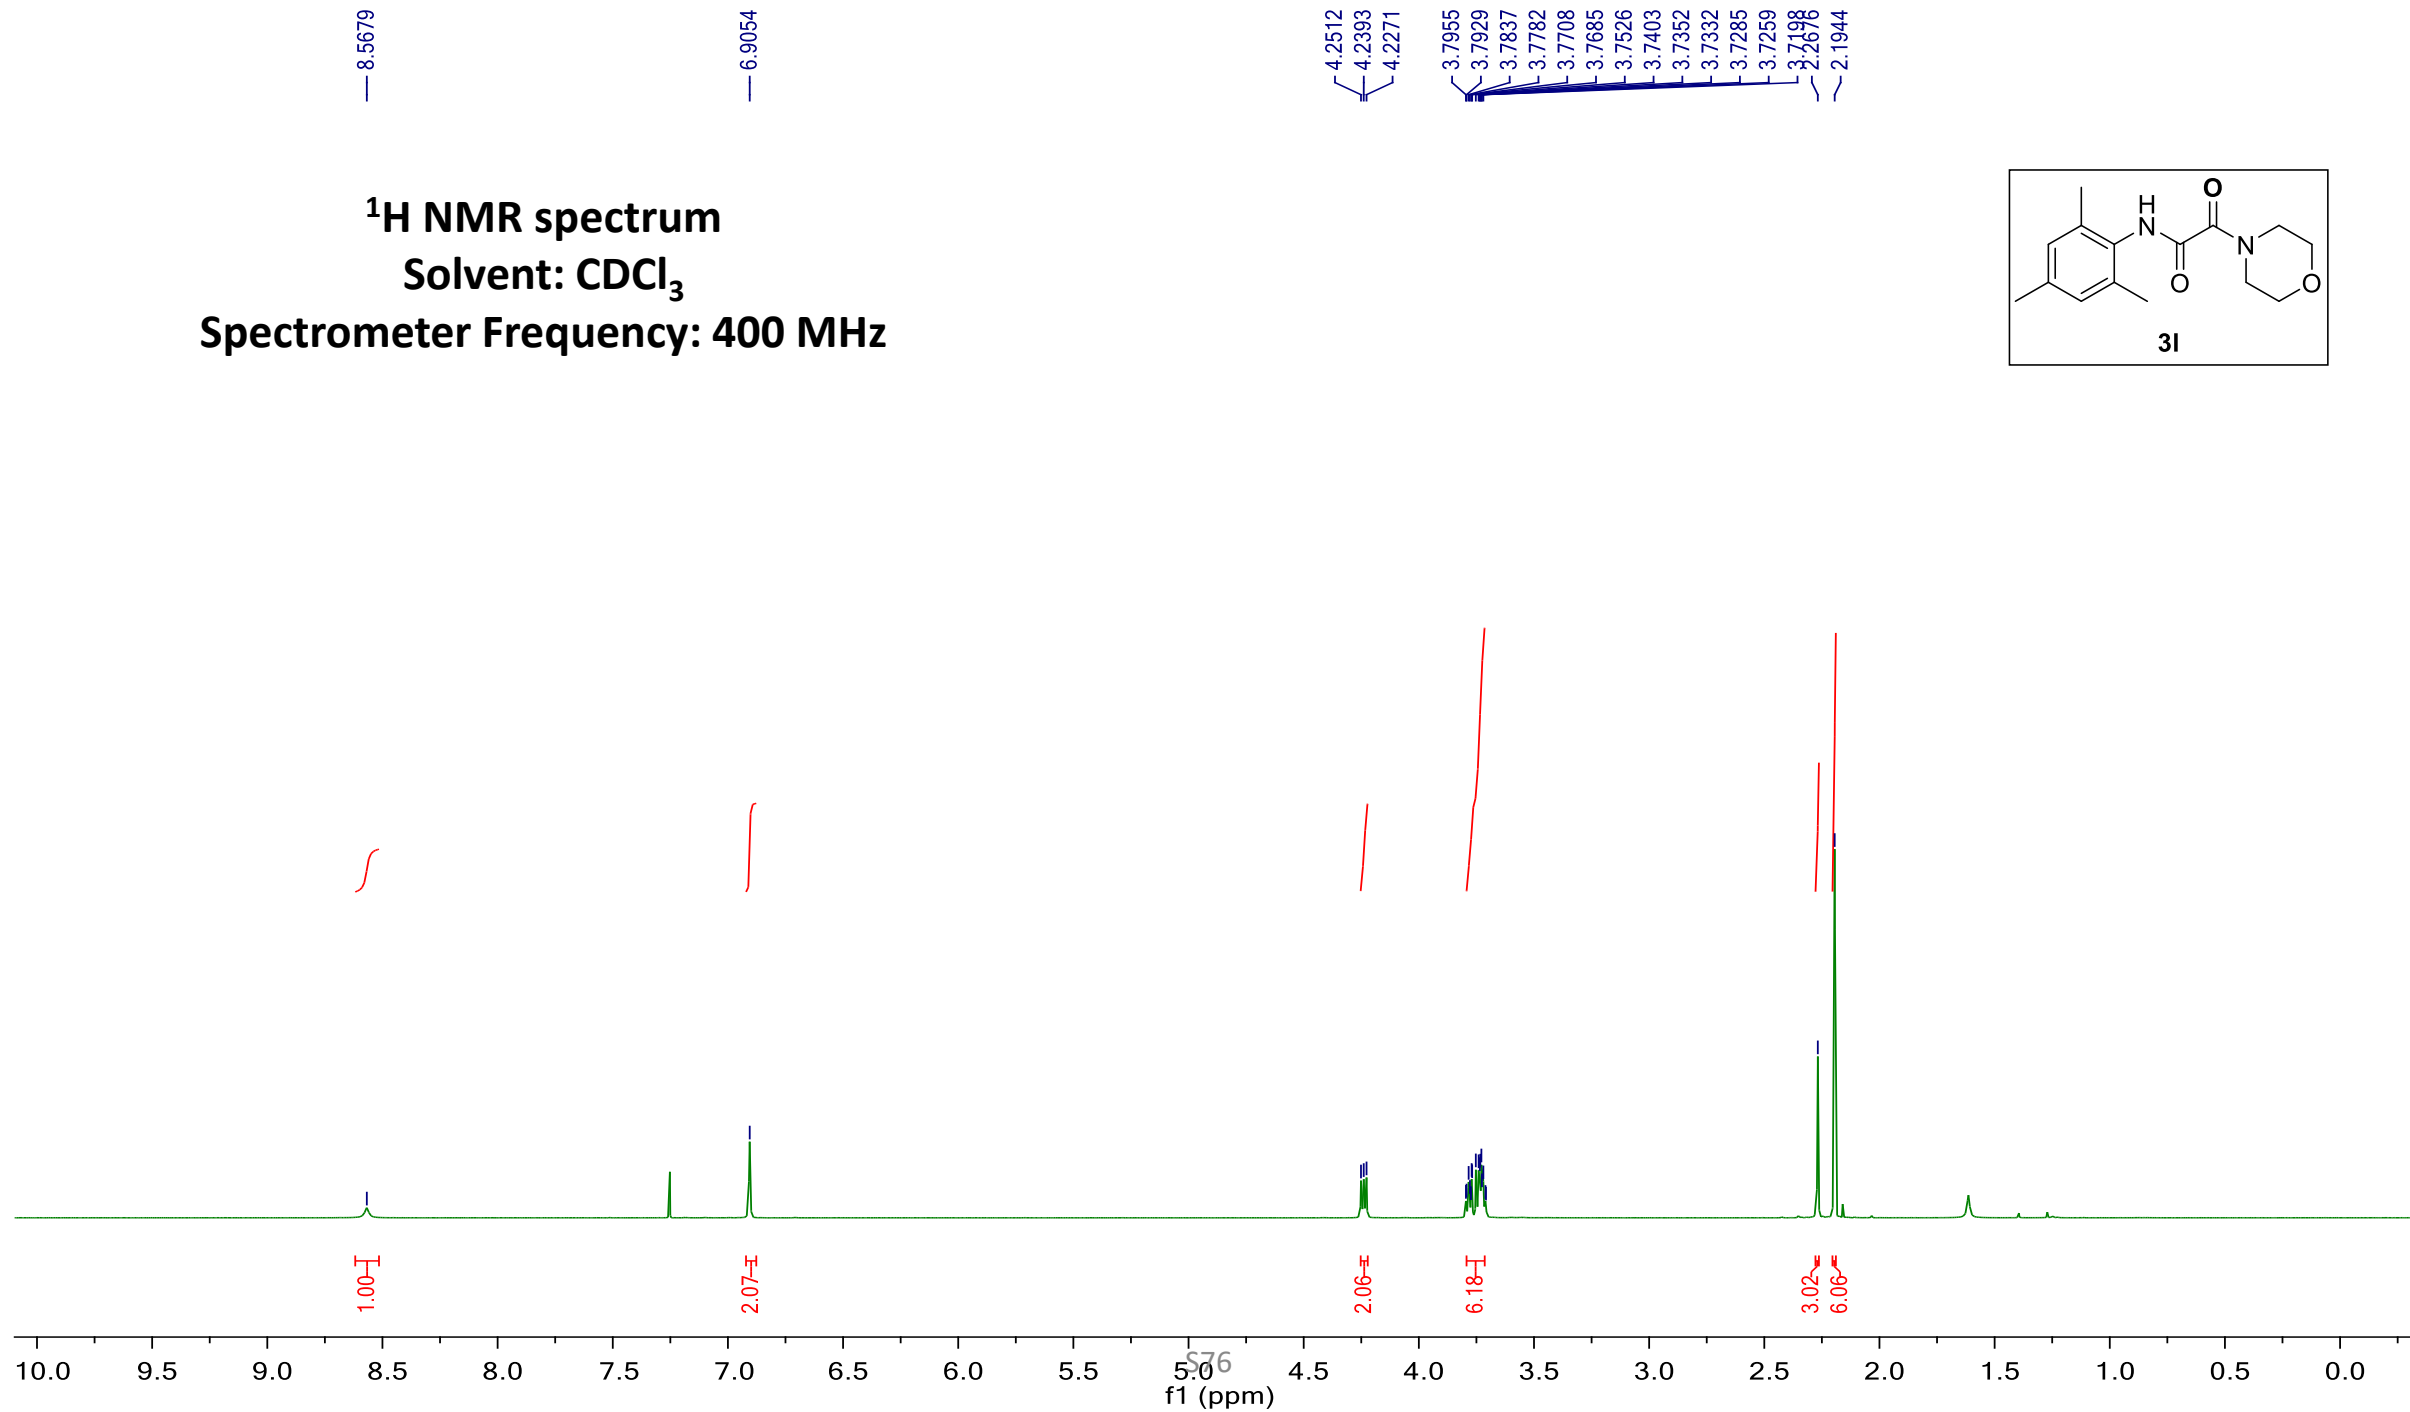

**$^{13}\text{C}$   $\{^1\text{H}\}$  NMR spectrum**  
**Solvent:  $\text{CDCl}_3$**   
**Spectrometer Frequency: 100 MHz**

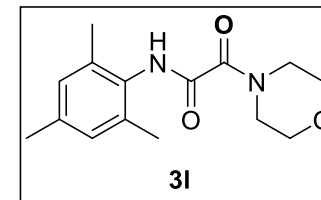

160.6152  
159.3051

137.5984  
134.8369  
129.9635  
129.1506

67.3537  
66.8883

47.3150  
43.8565

21.0640  
18.4363

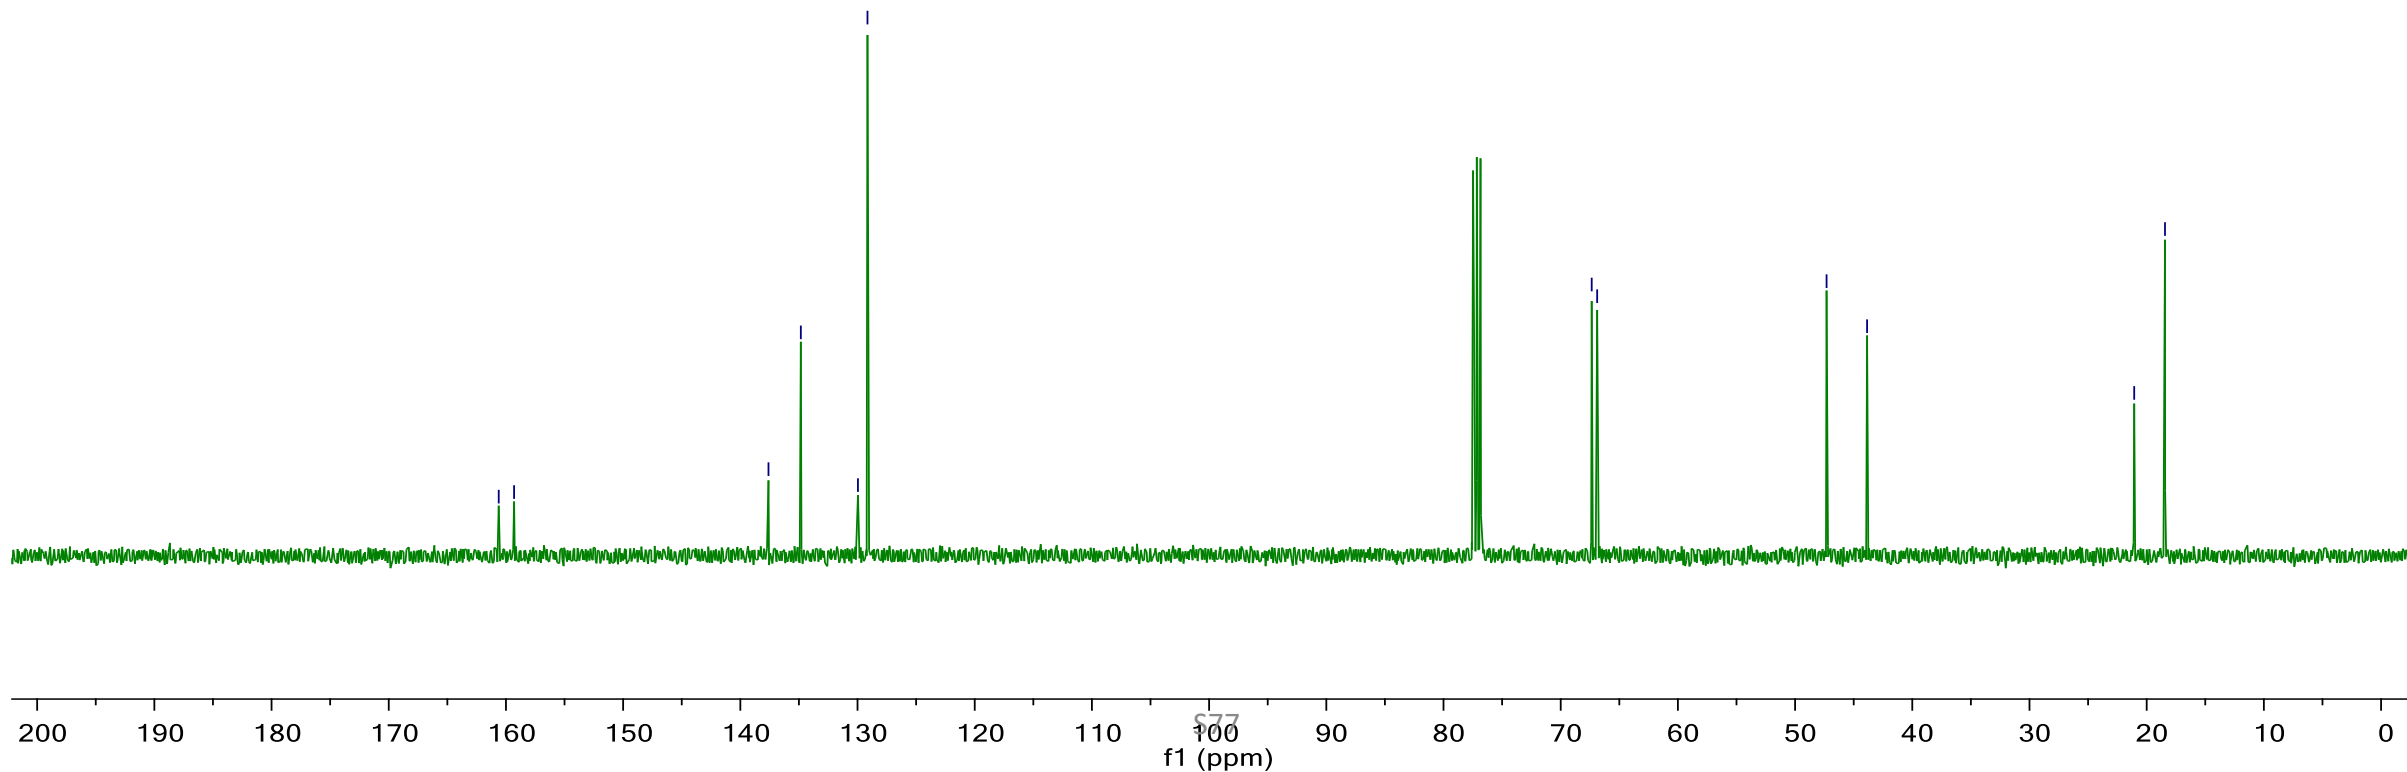

**$^1\text{H}$  NMR spectrum**  
**Solvent: DMSO- $d_6$**   
**Spectrometer Frequency: 600 MHz**

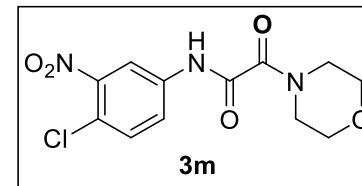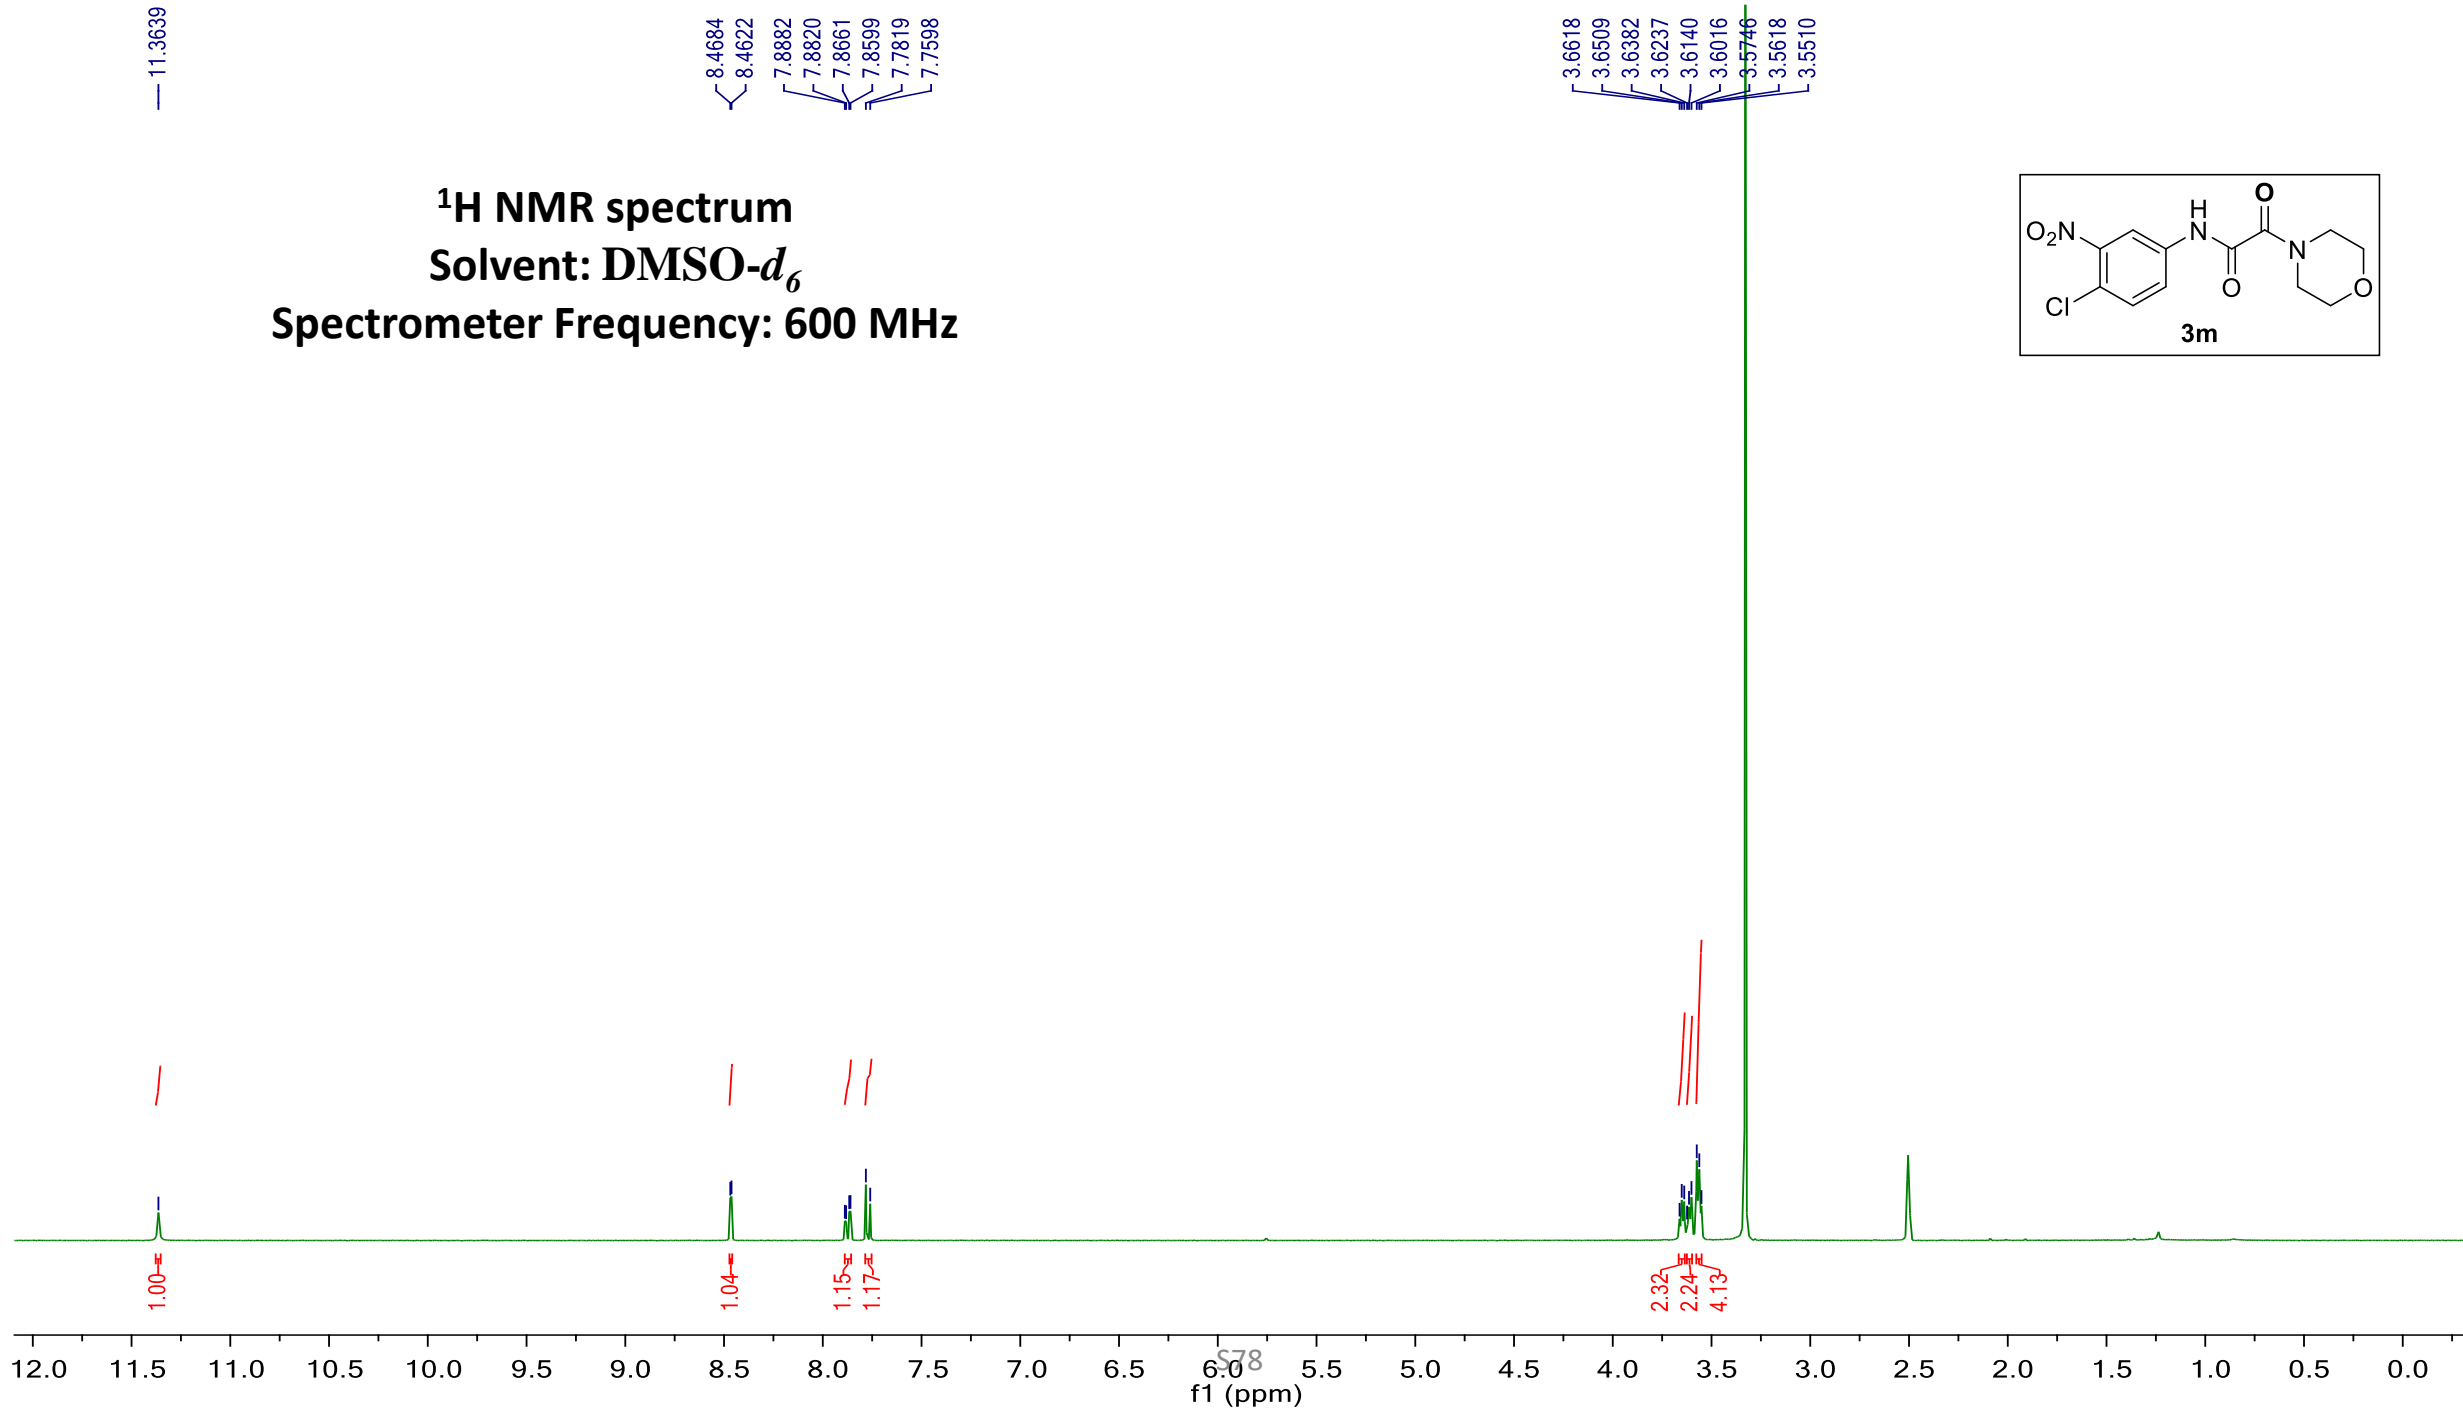

**$^{13}\text{C}$  { $^1\text{H}$ } NMR spectrum**  
**Solvent:  $\text{CDCl}_3$**   
**Spectrometer Frequency: 600 MHz**

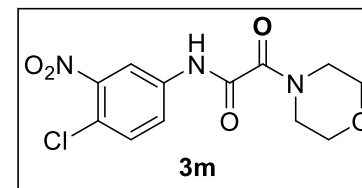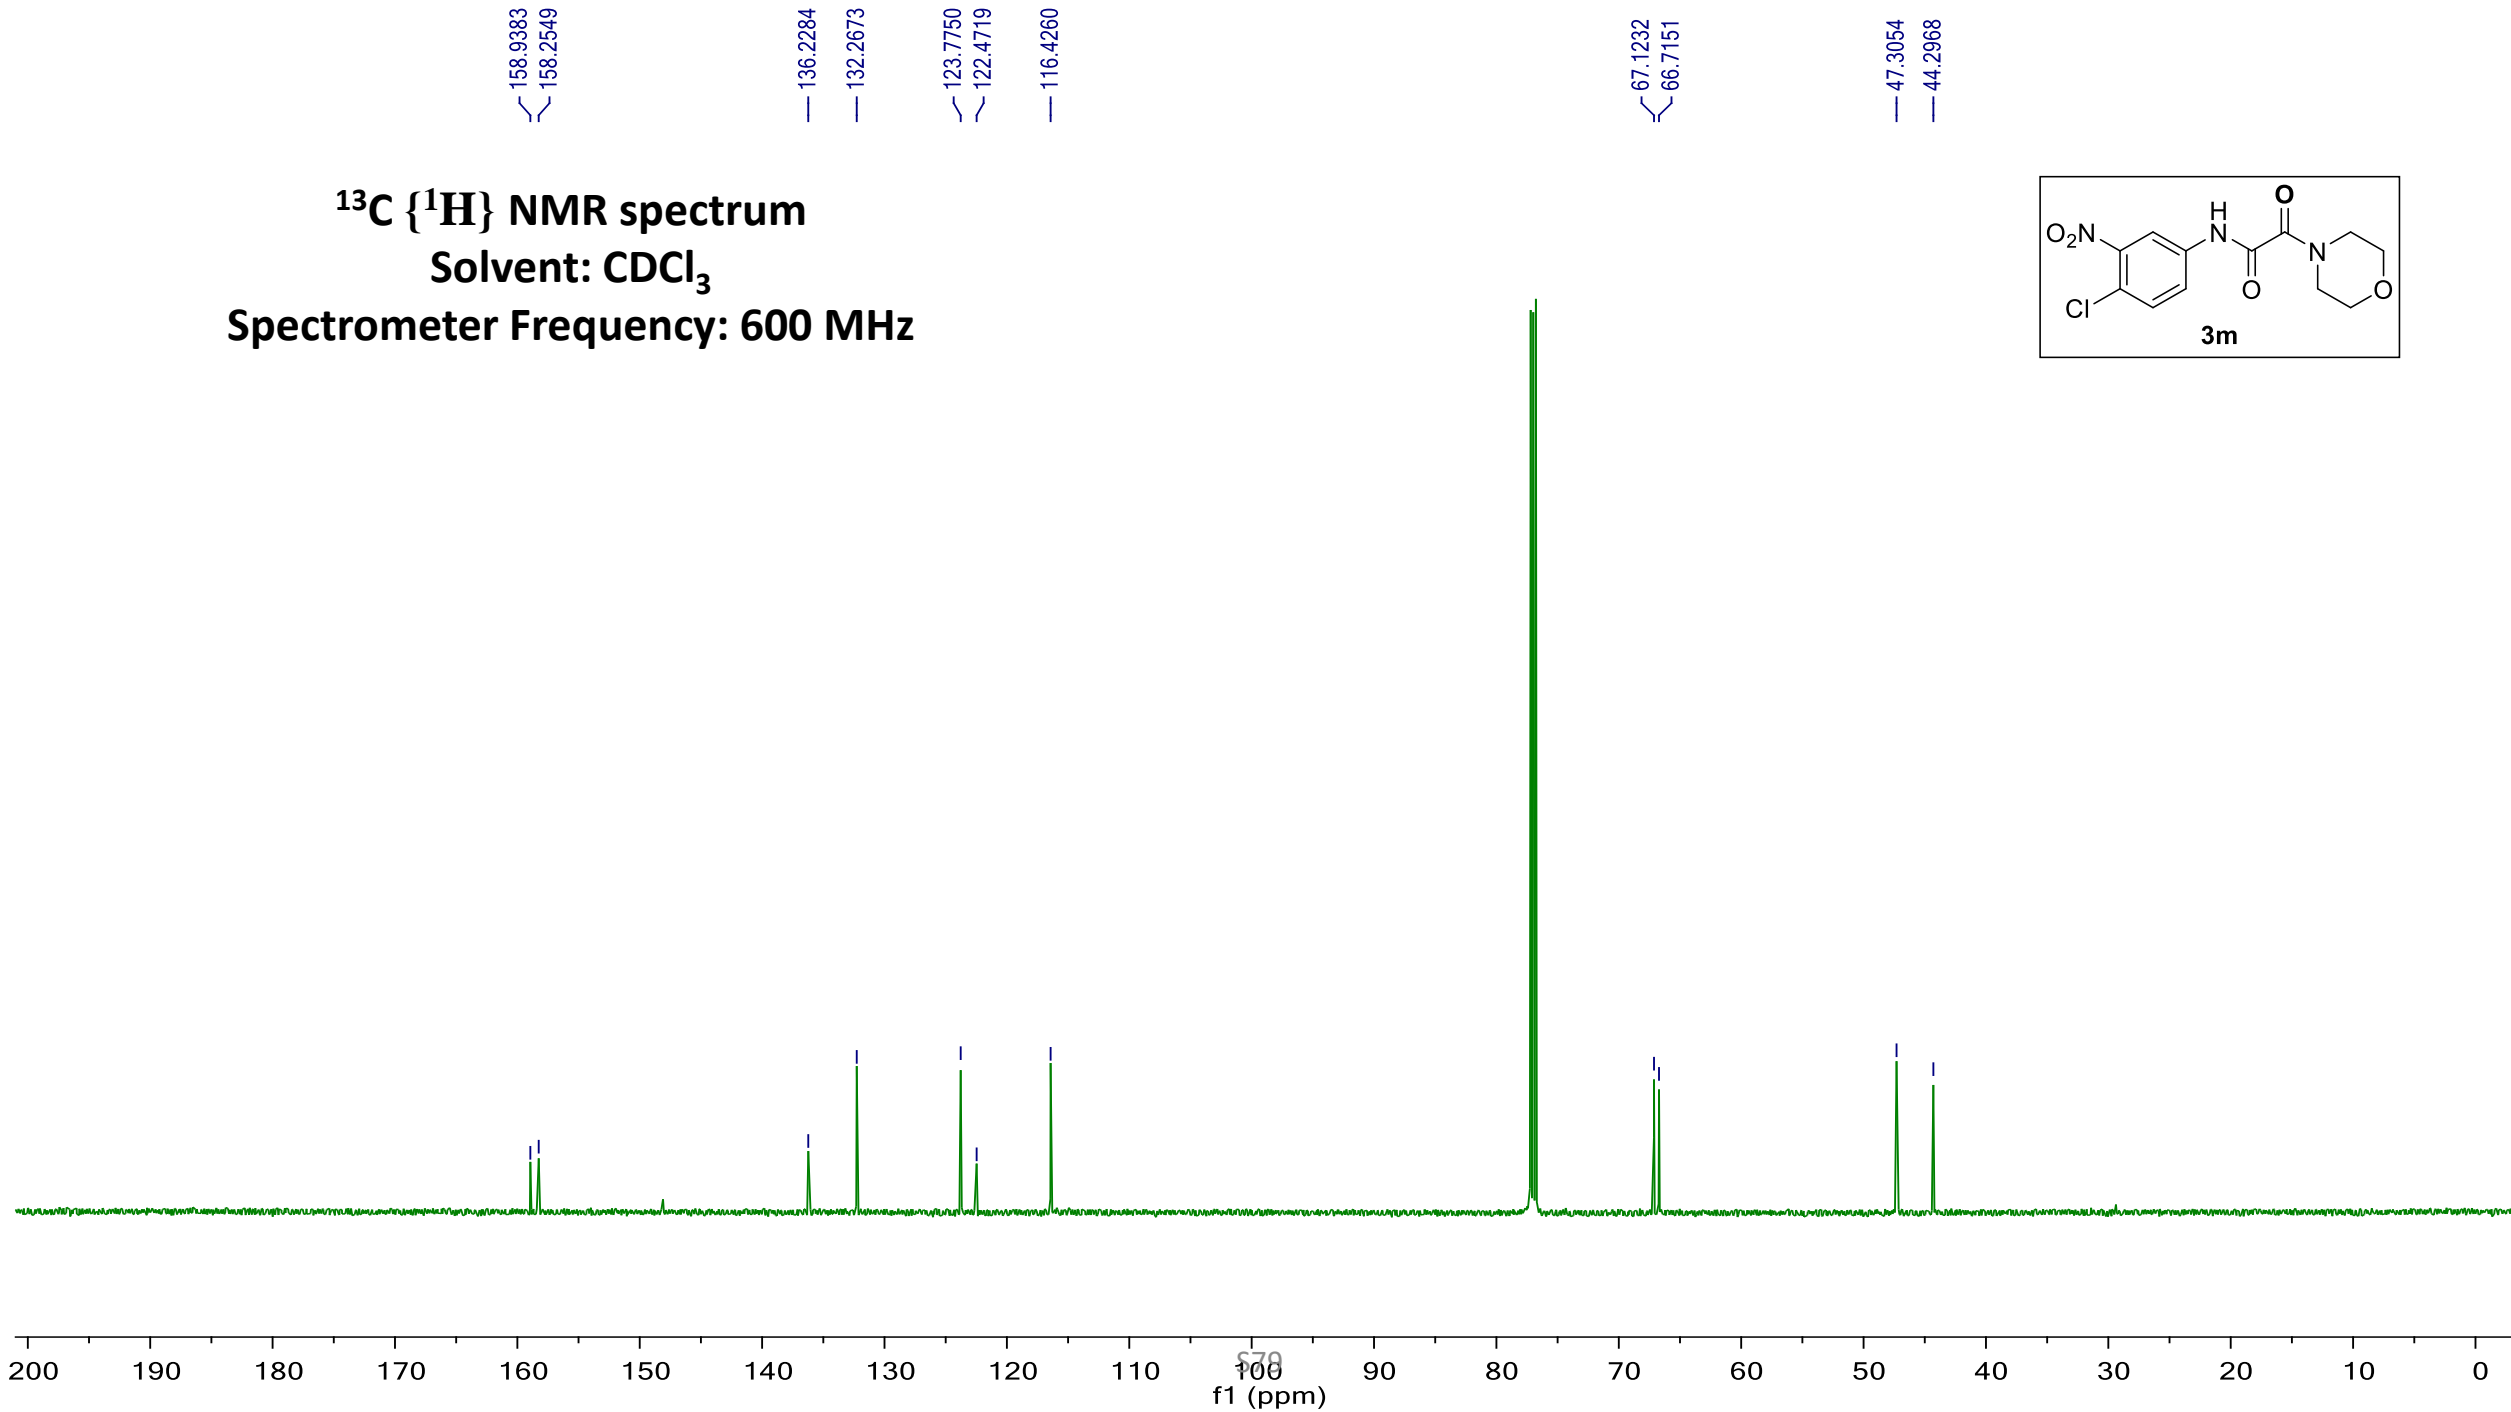

**$^1\text{H}$  NMR spectrum**  
**Solvent:  $\text{DMSO-}d_6$**   
**Spectrometer Frequency: 600 MHz**

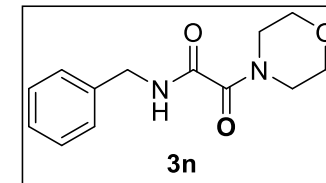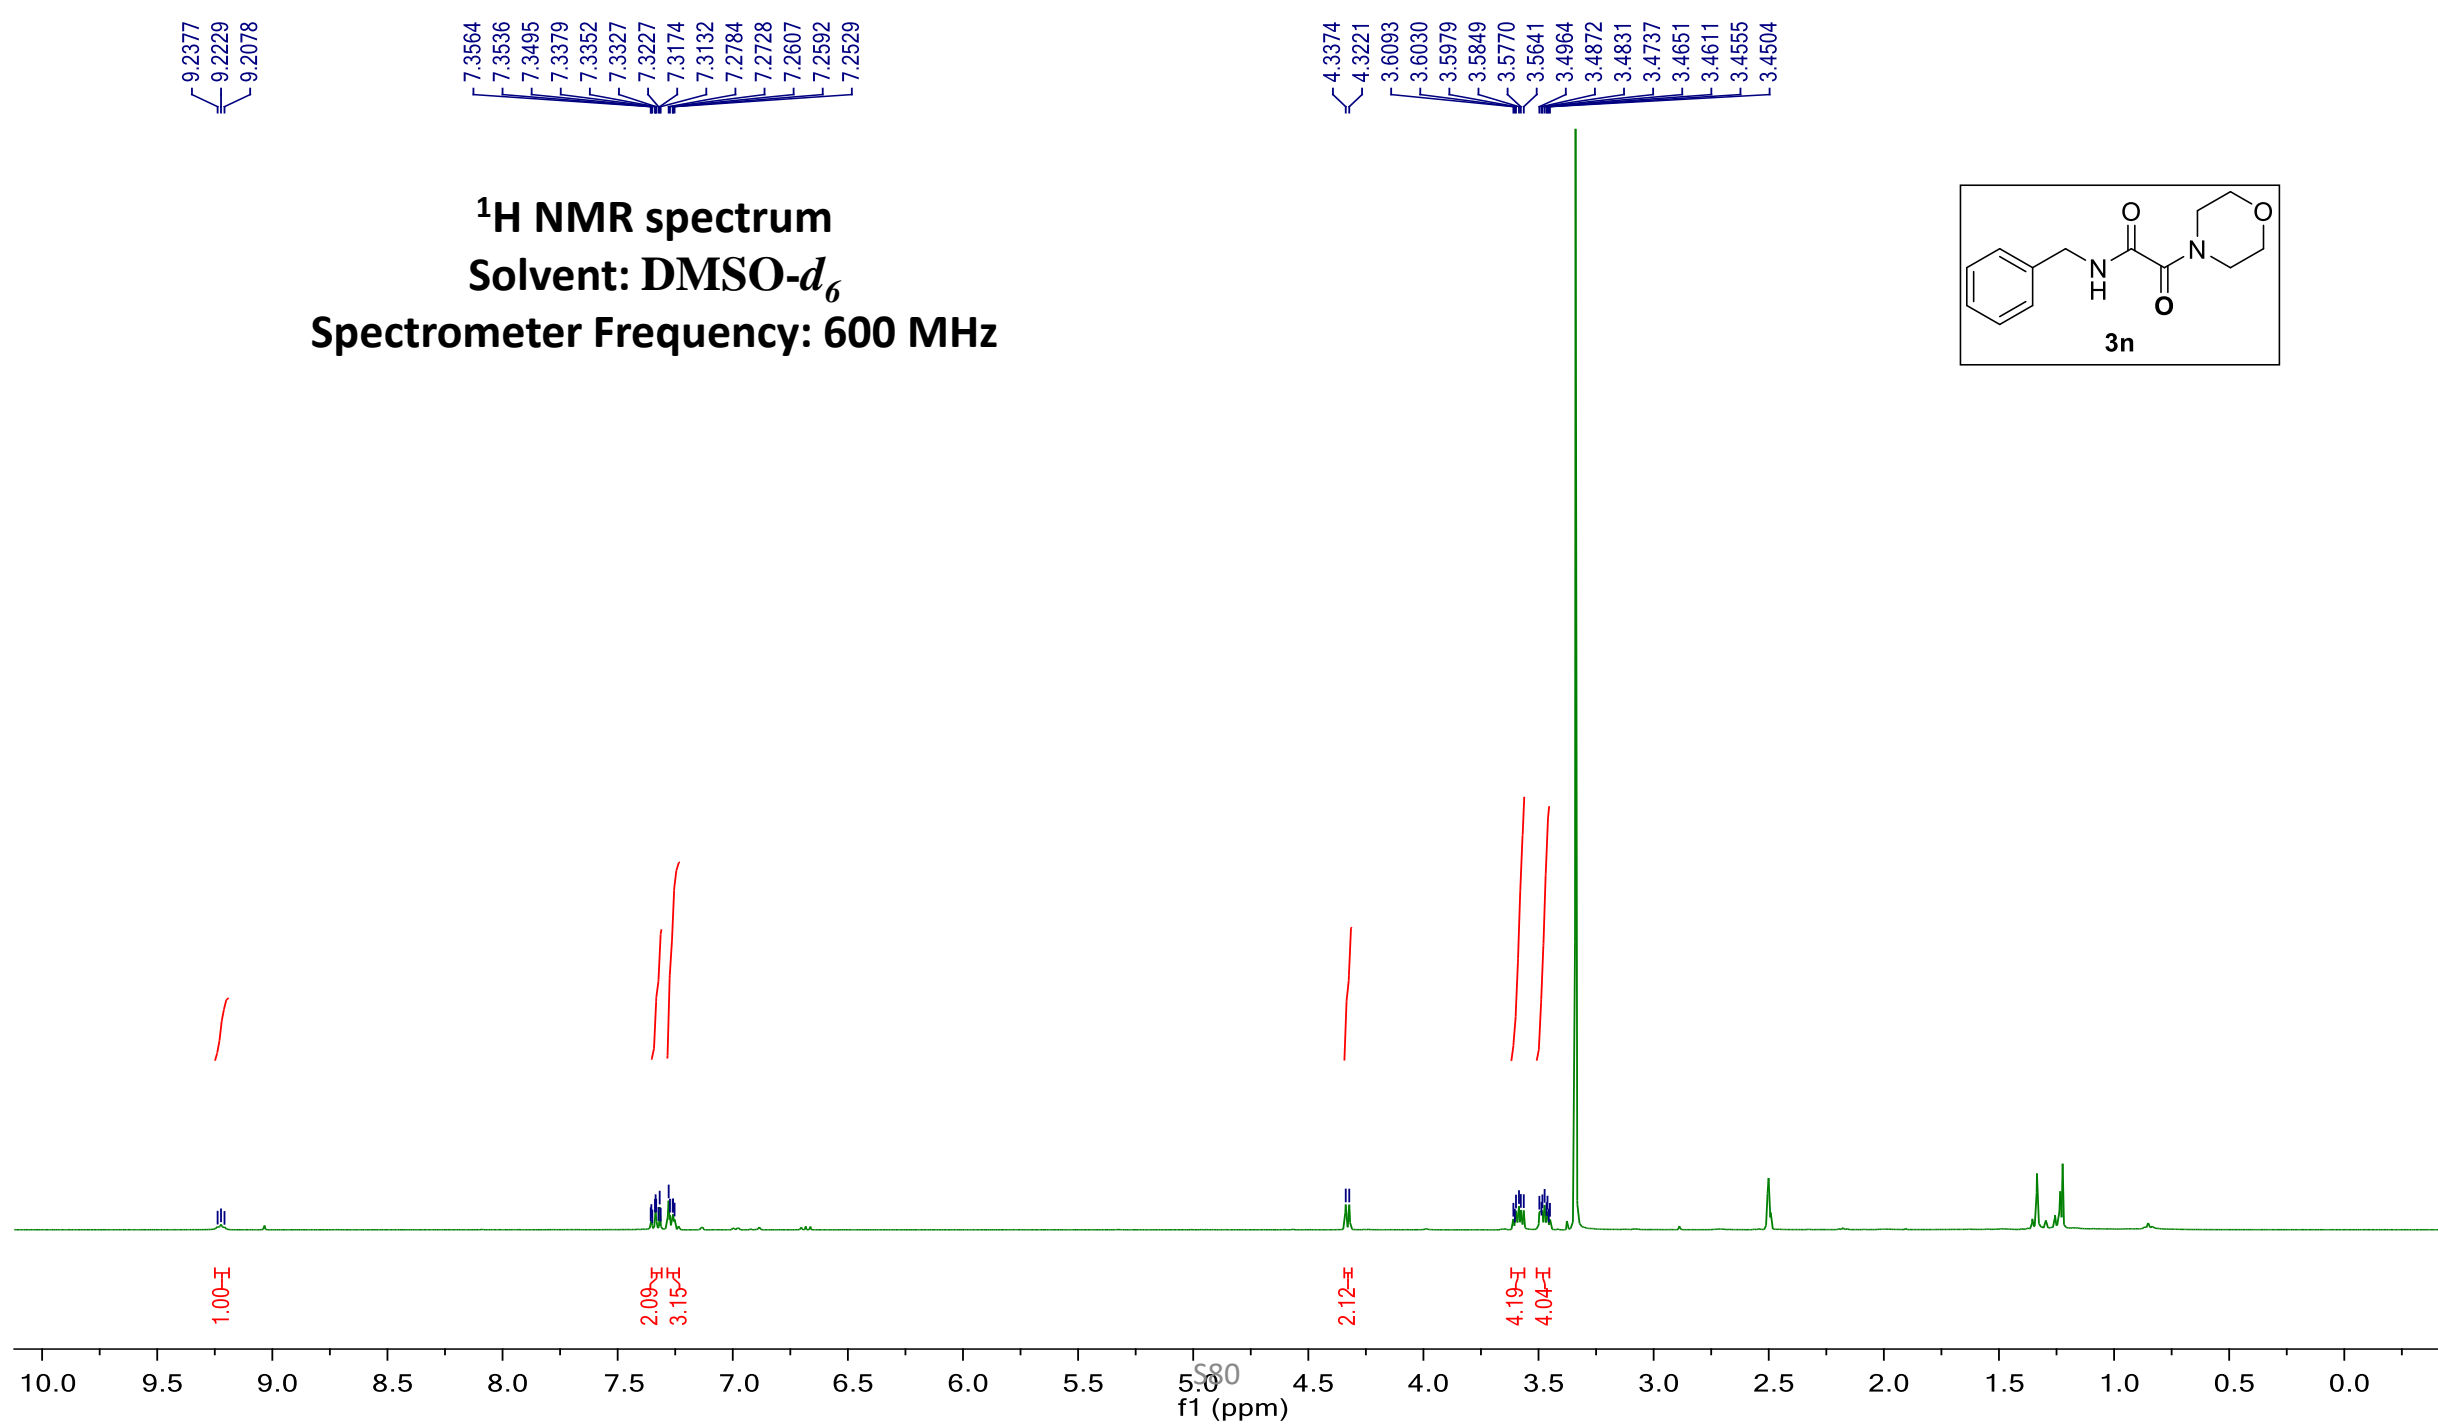

**$^{13}\text{C}$  { $^1\text{H}$ } NMR spectrum**  
**Solvent: DMSO- $d_6$**   
**Spectrometer Frequency: 151 MHz**

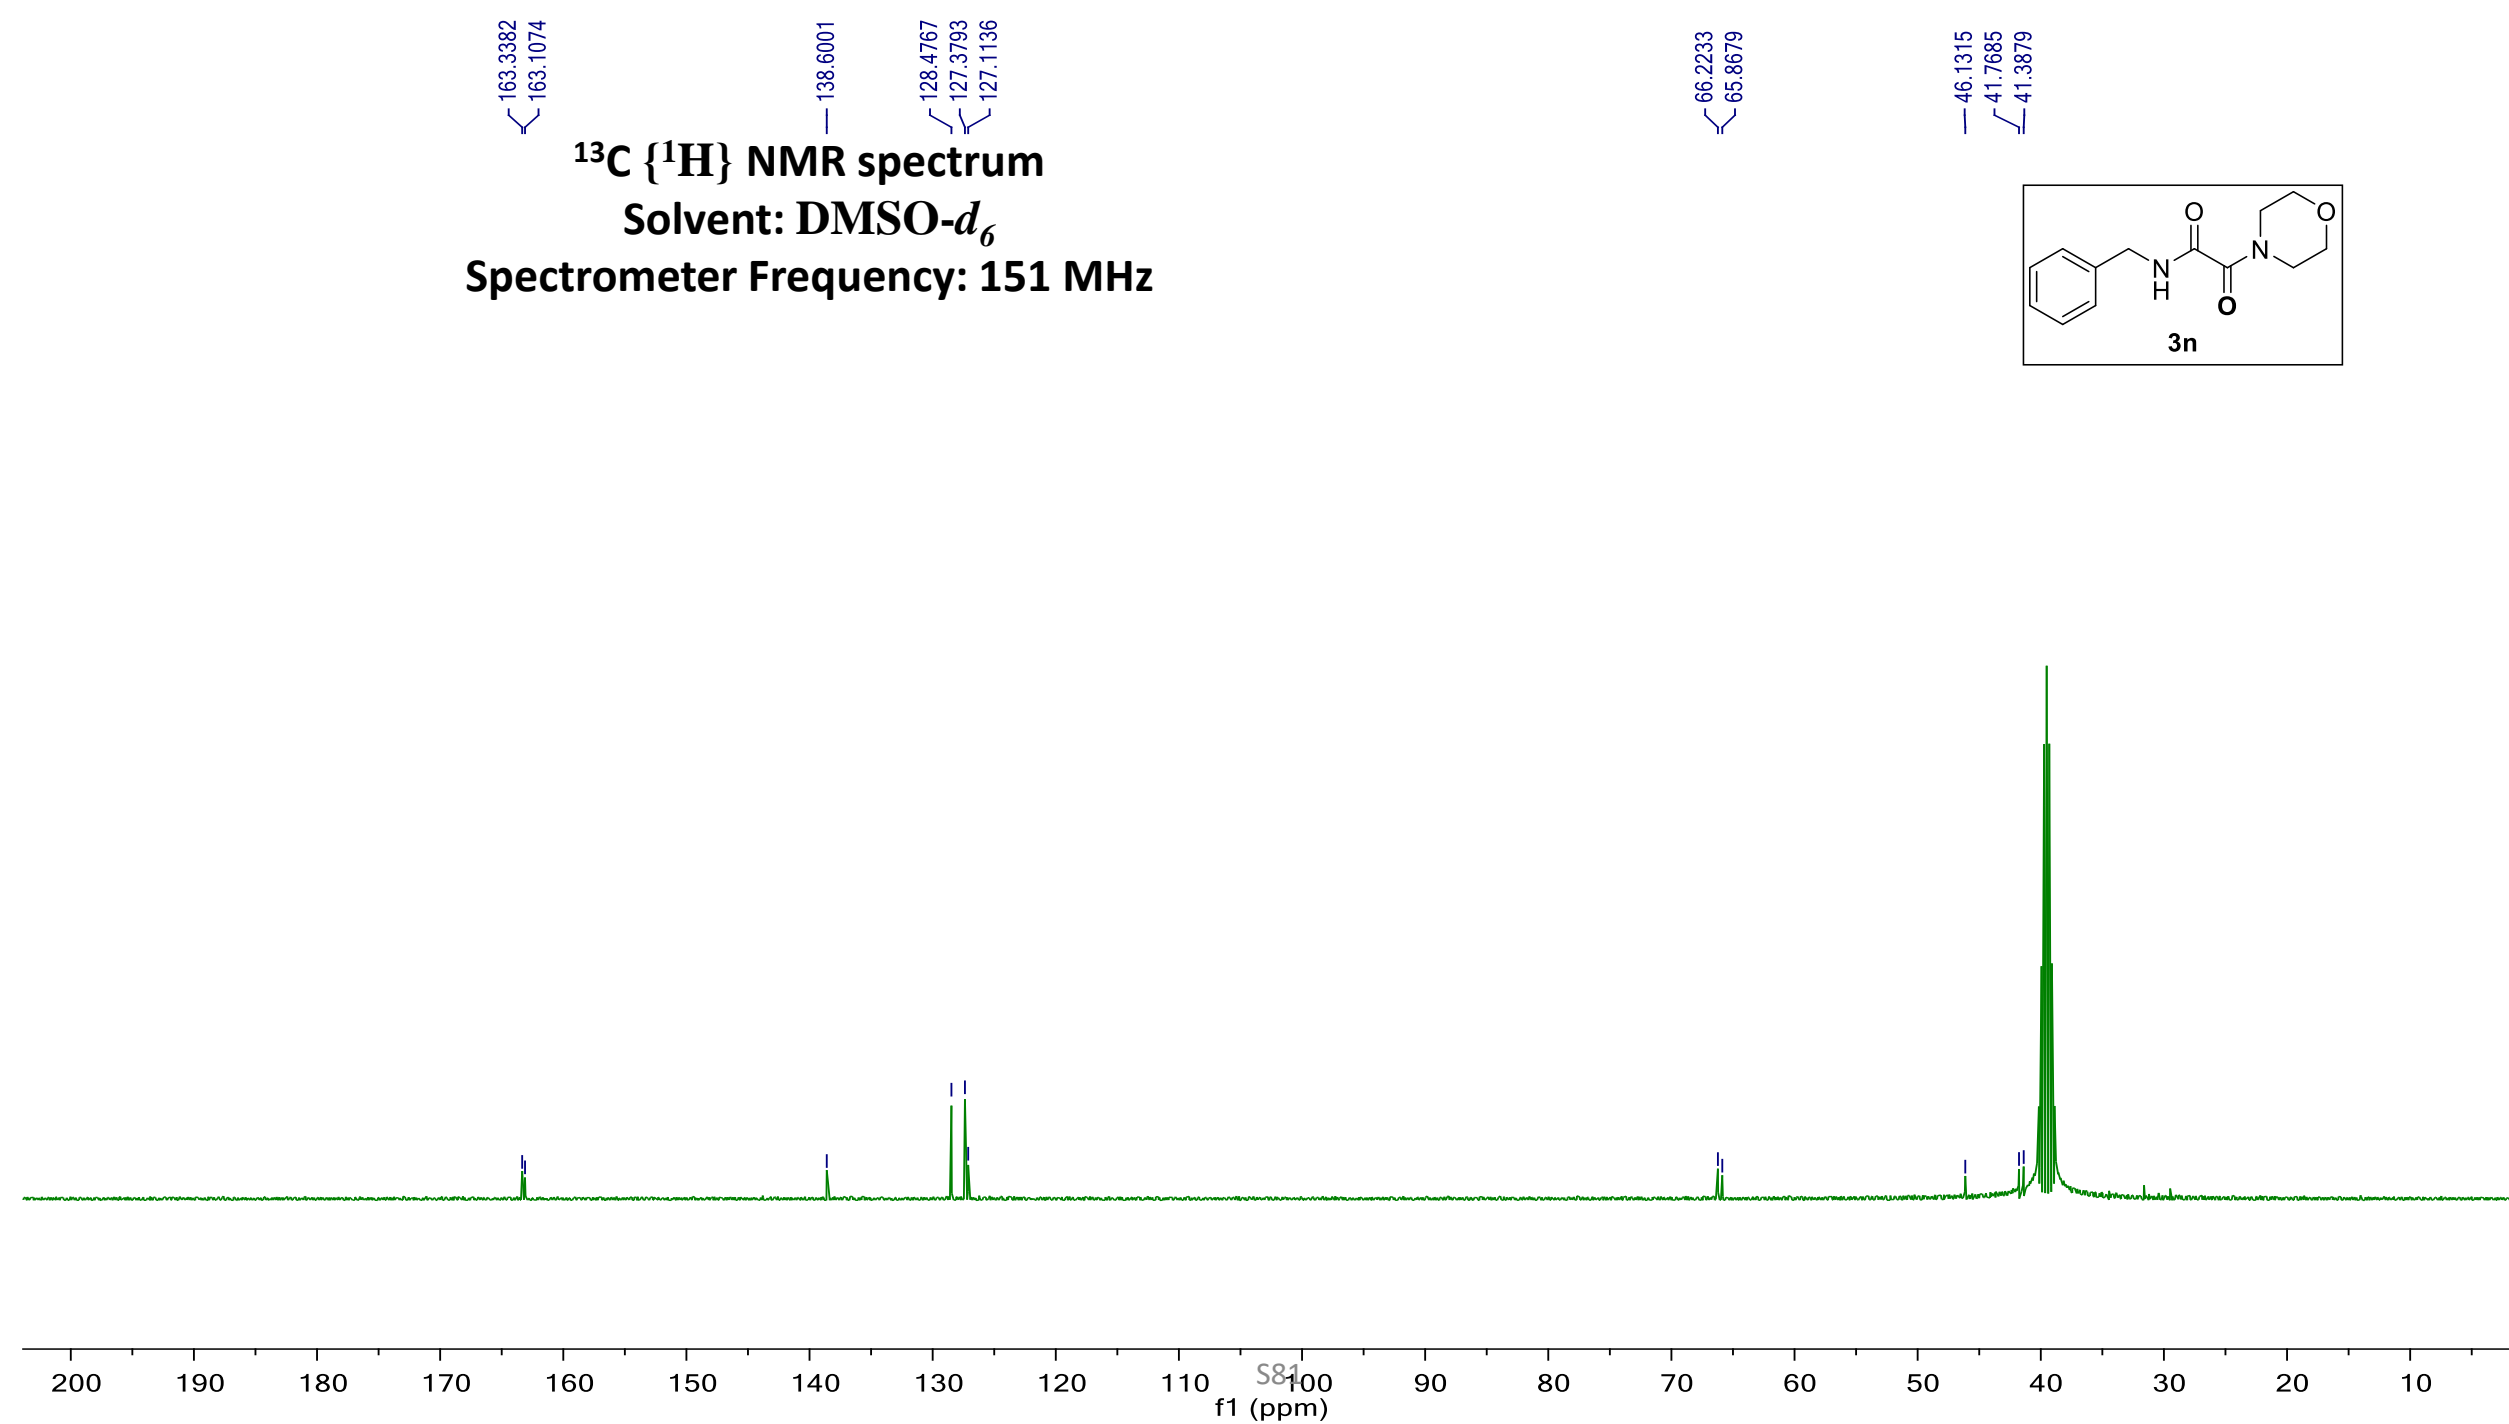

**$^1\text{H}$  NMR spectrum**  
**Solvent:  $\text{CDCl}_3$**   
**Spectrometer Frequency: 400 MHz**

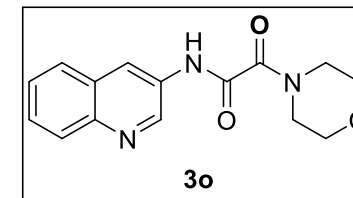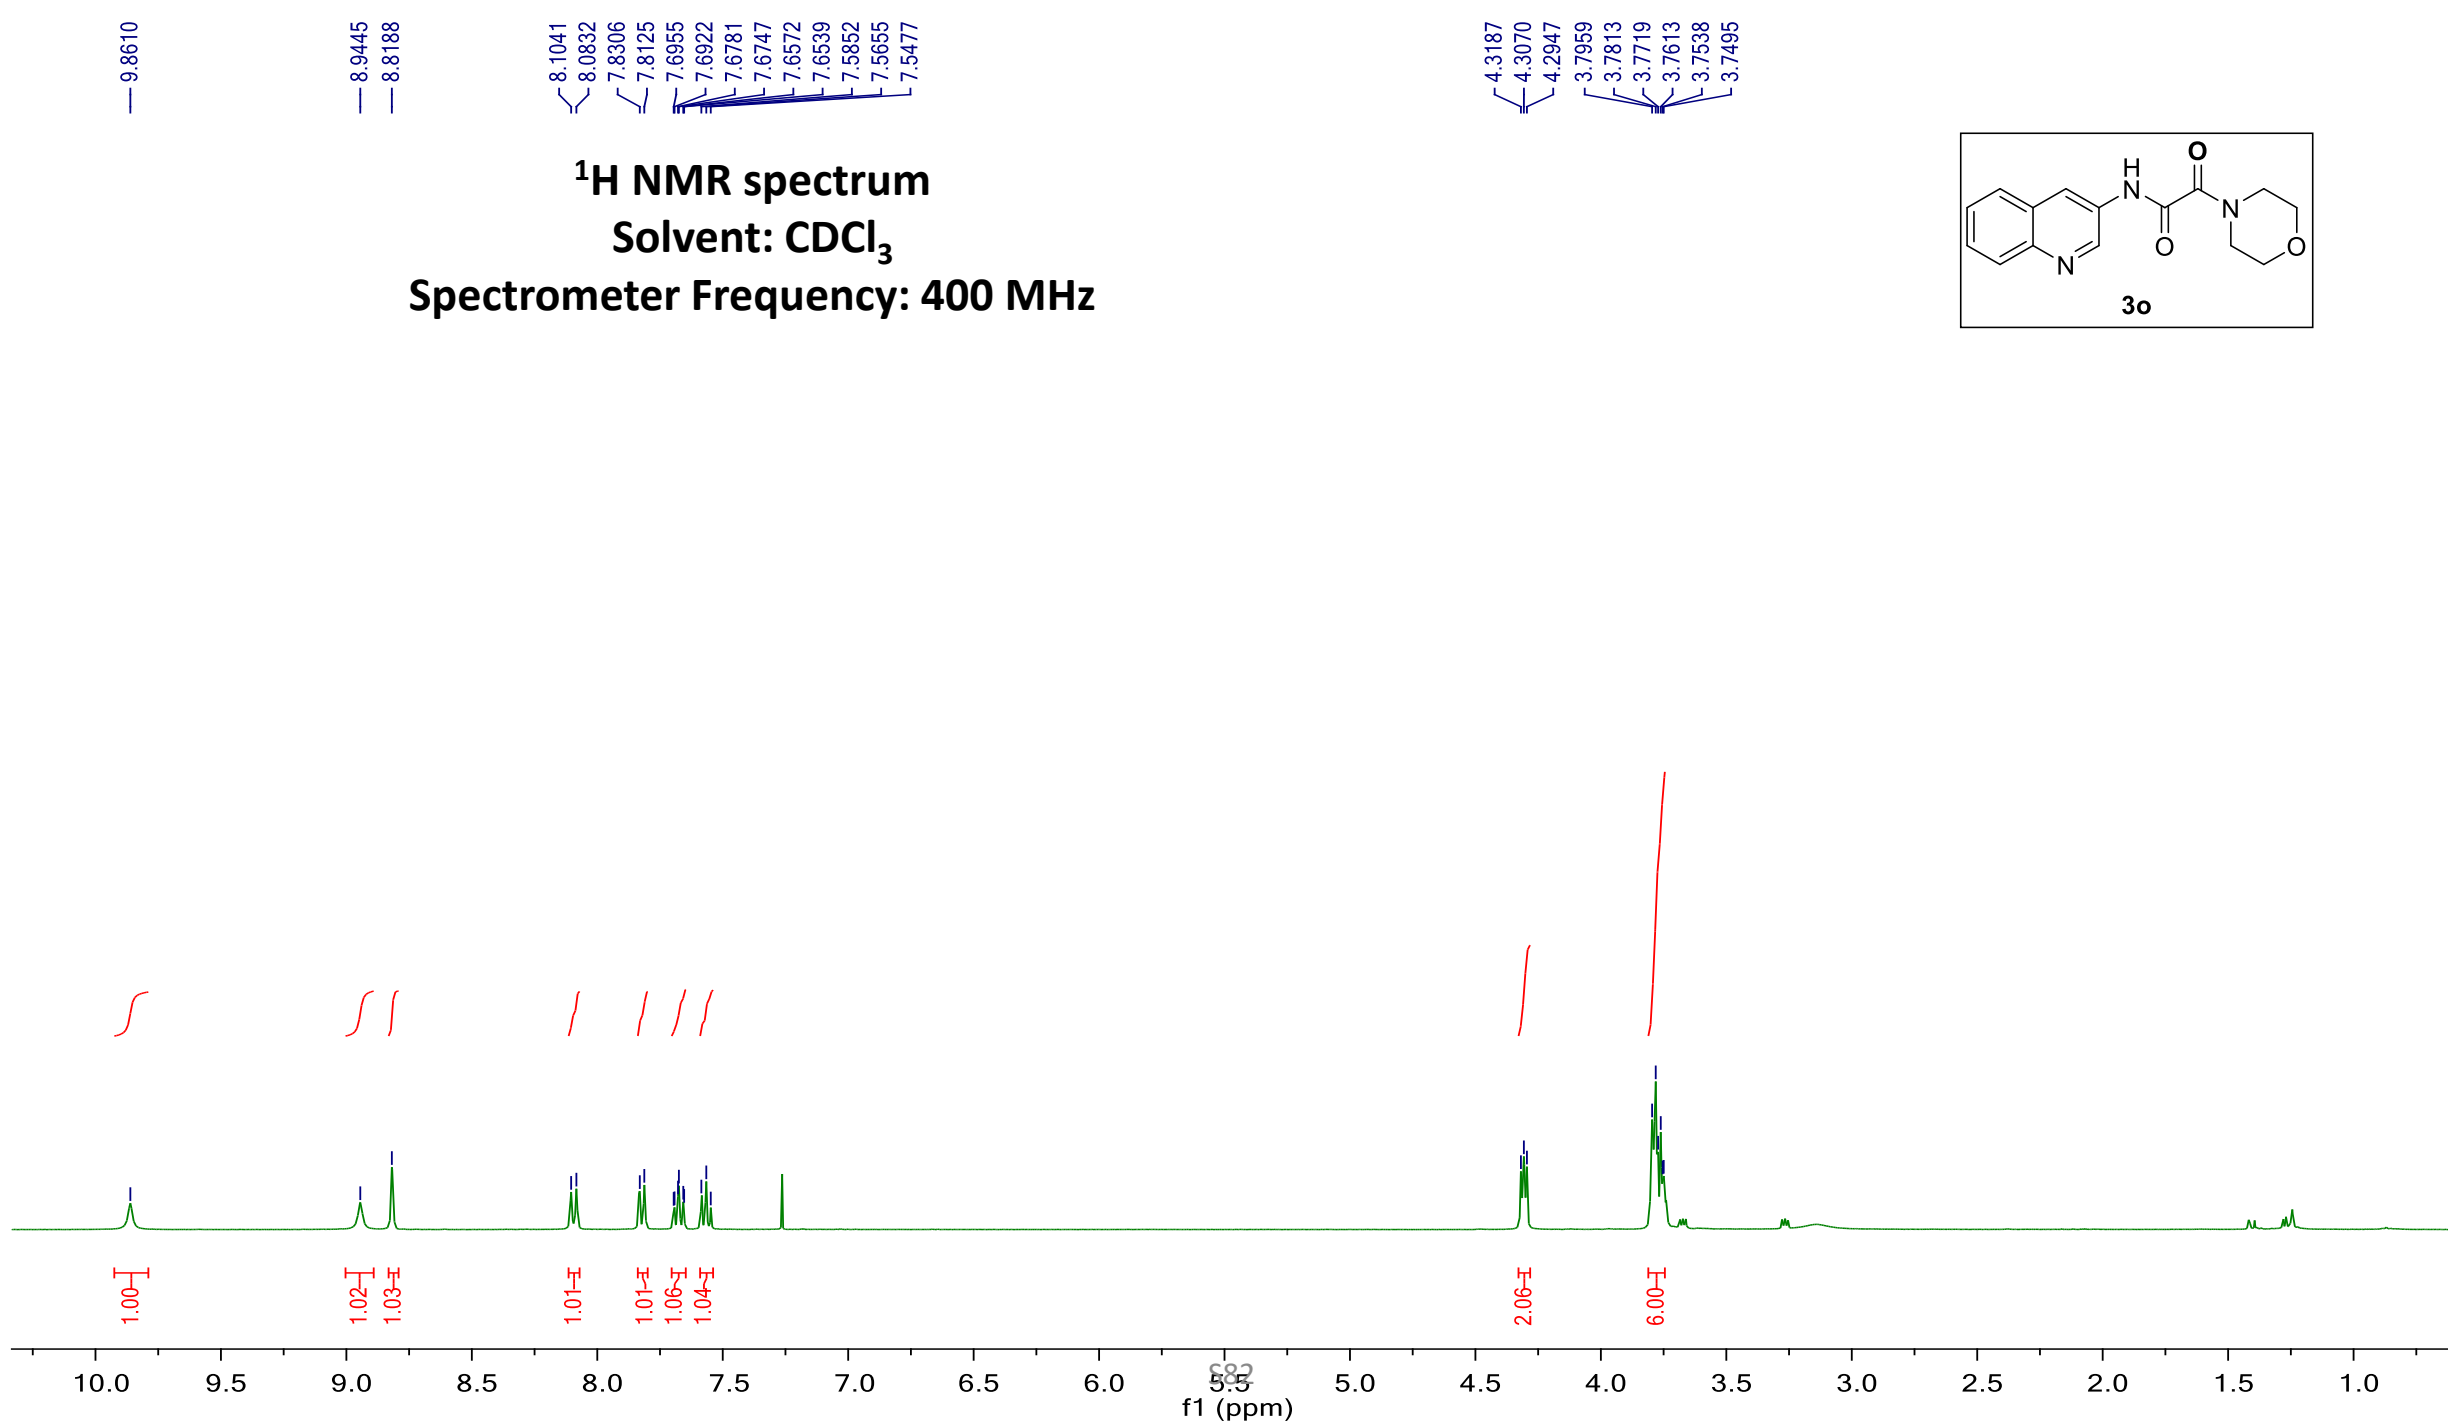

**$^{13}\text{C} \{^1\text{H}\}$  NMR spectrum**  
**Solvent:  $\text{CDCl}_3$**   
**Spectrometer Frequency: 100 MHz**

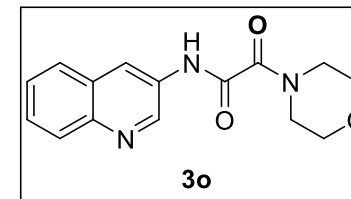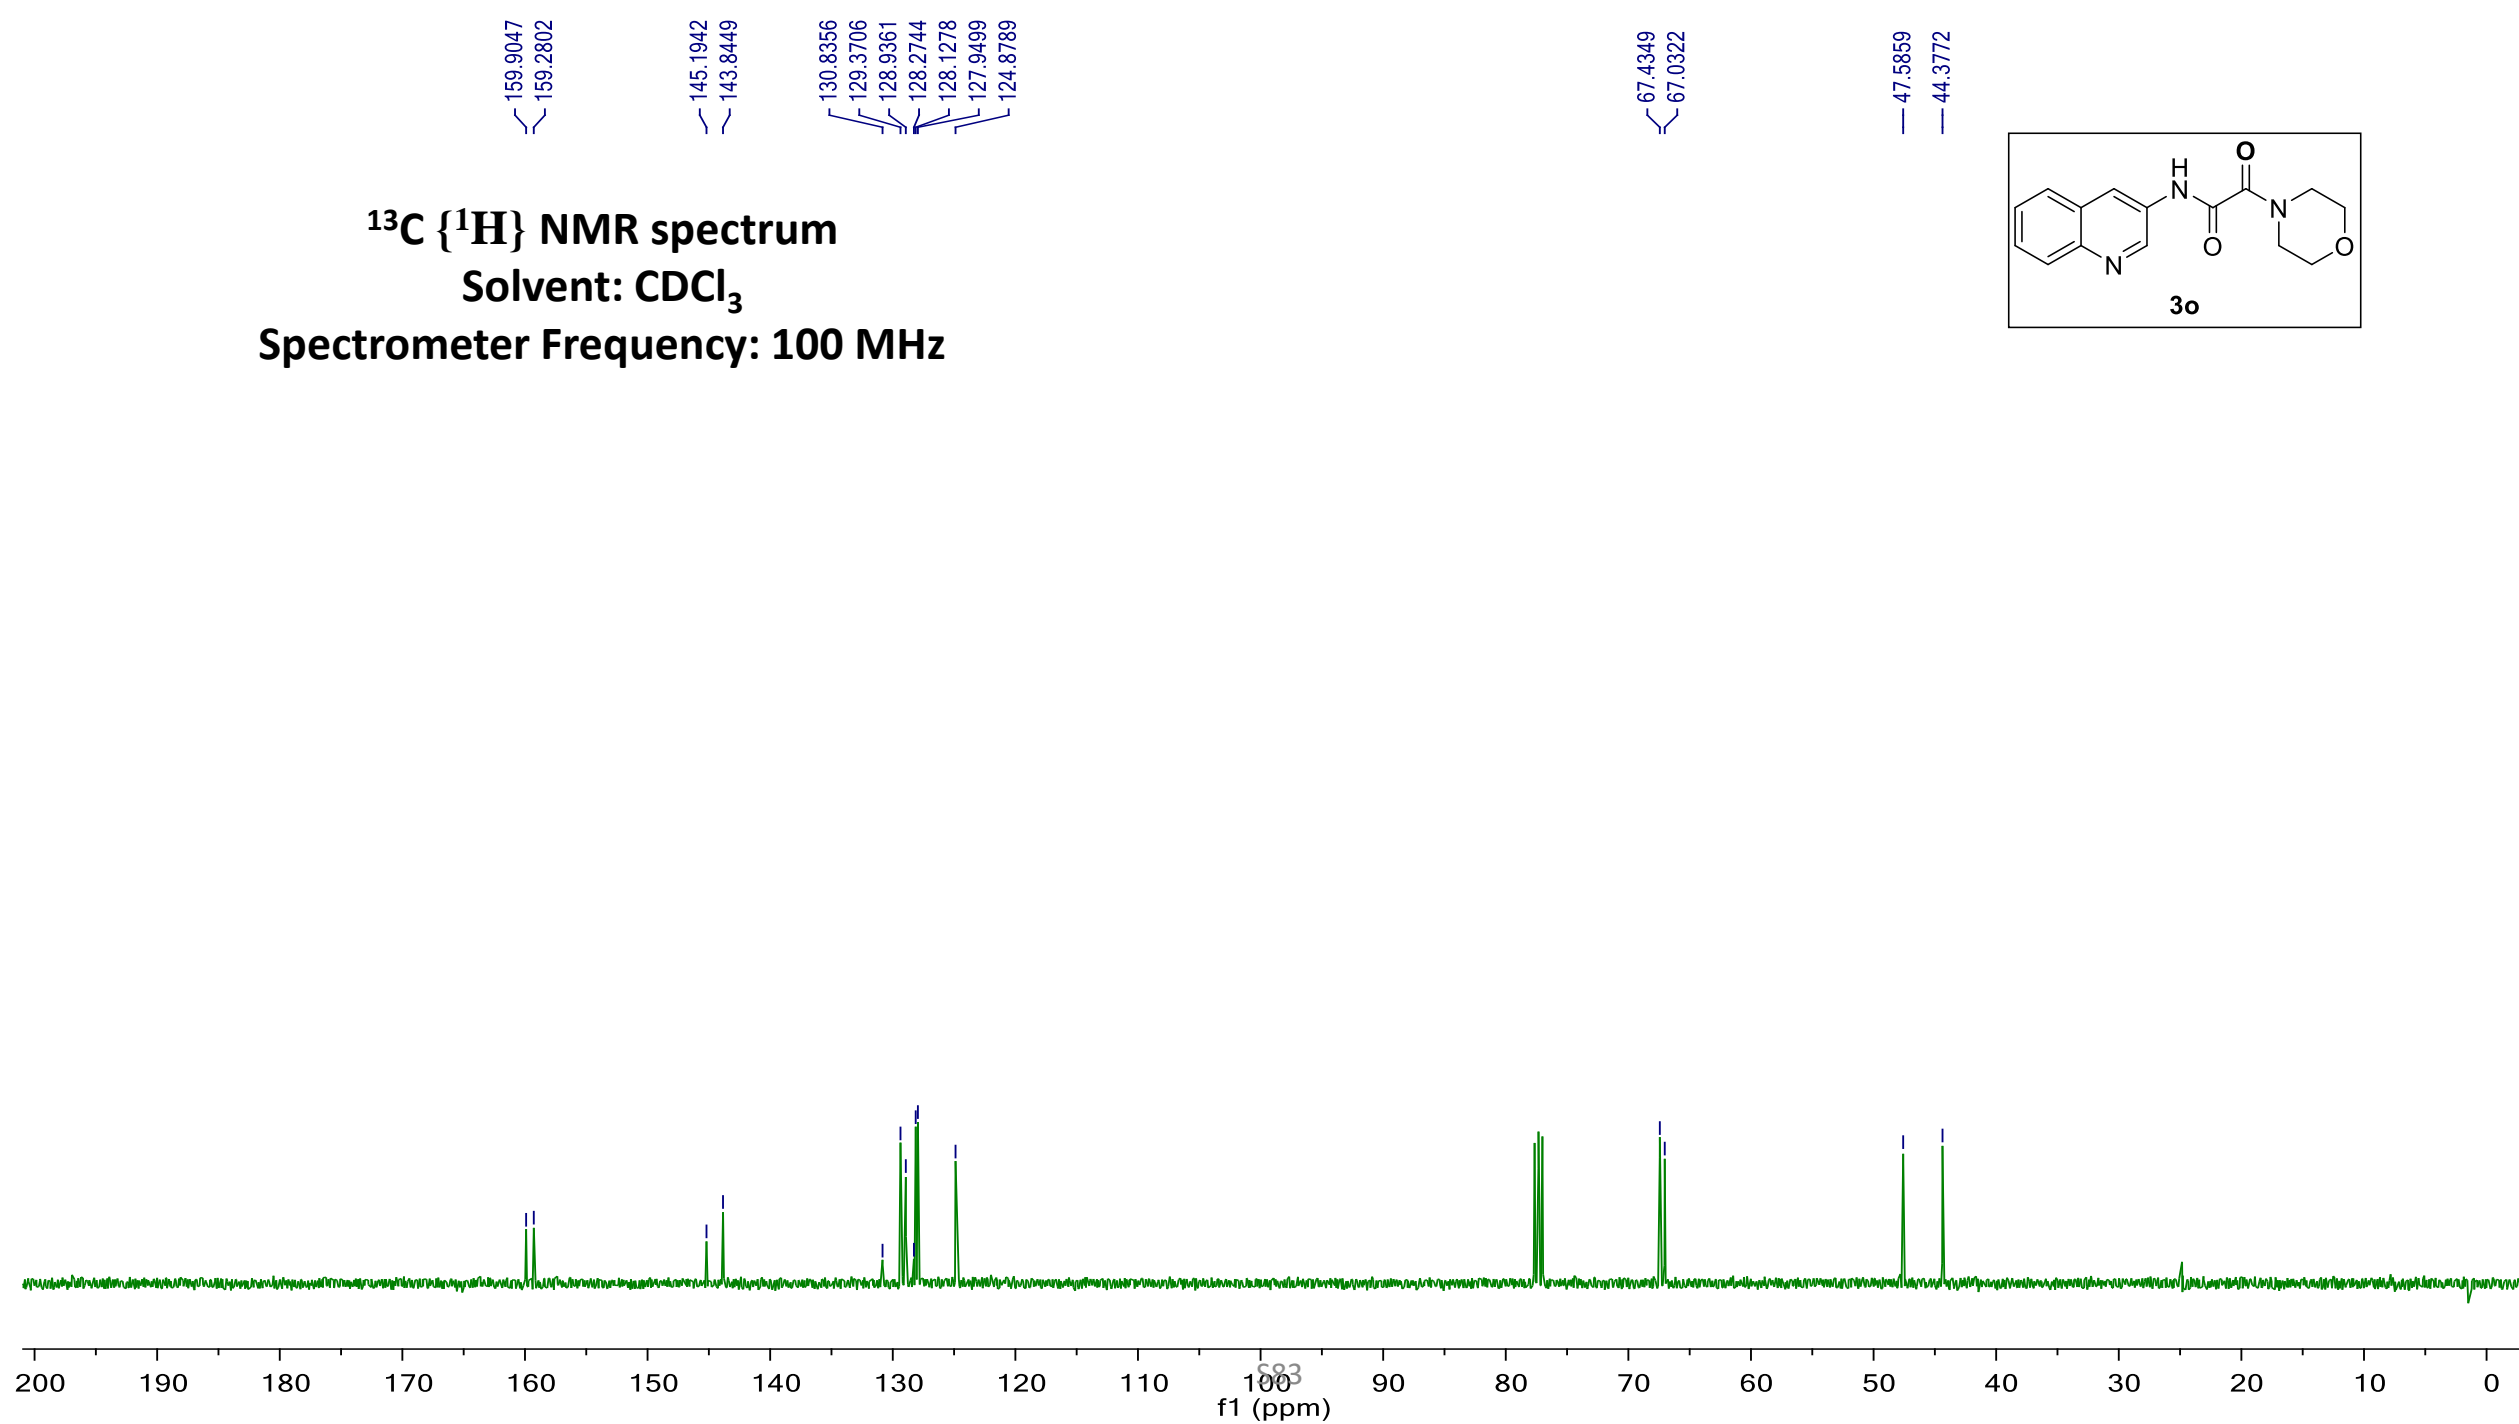

**$^1\text{H}$  NMR spectrum**  
**Solvent:  $\text{CDCl}_3$**   
**Spectrometer Frequency: 400 MHz**

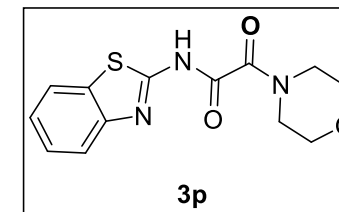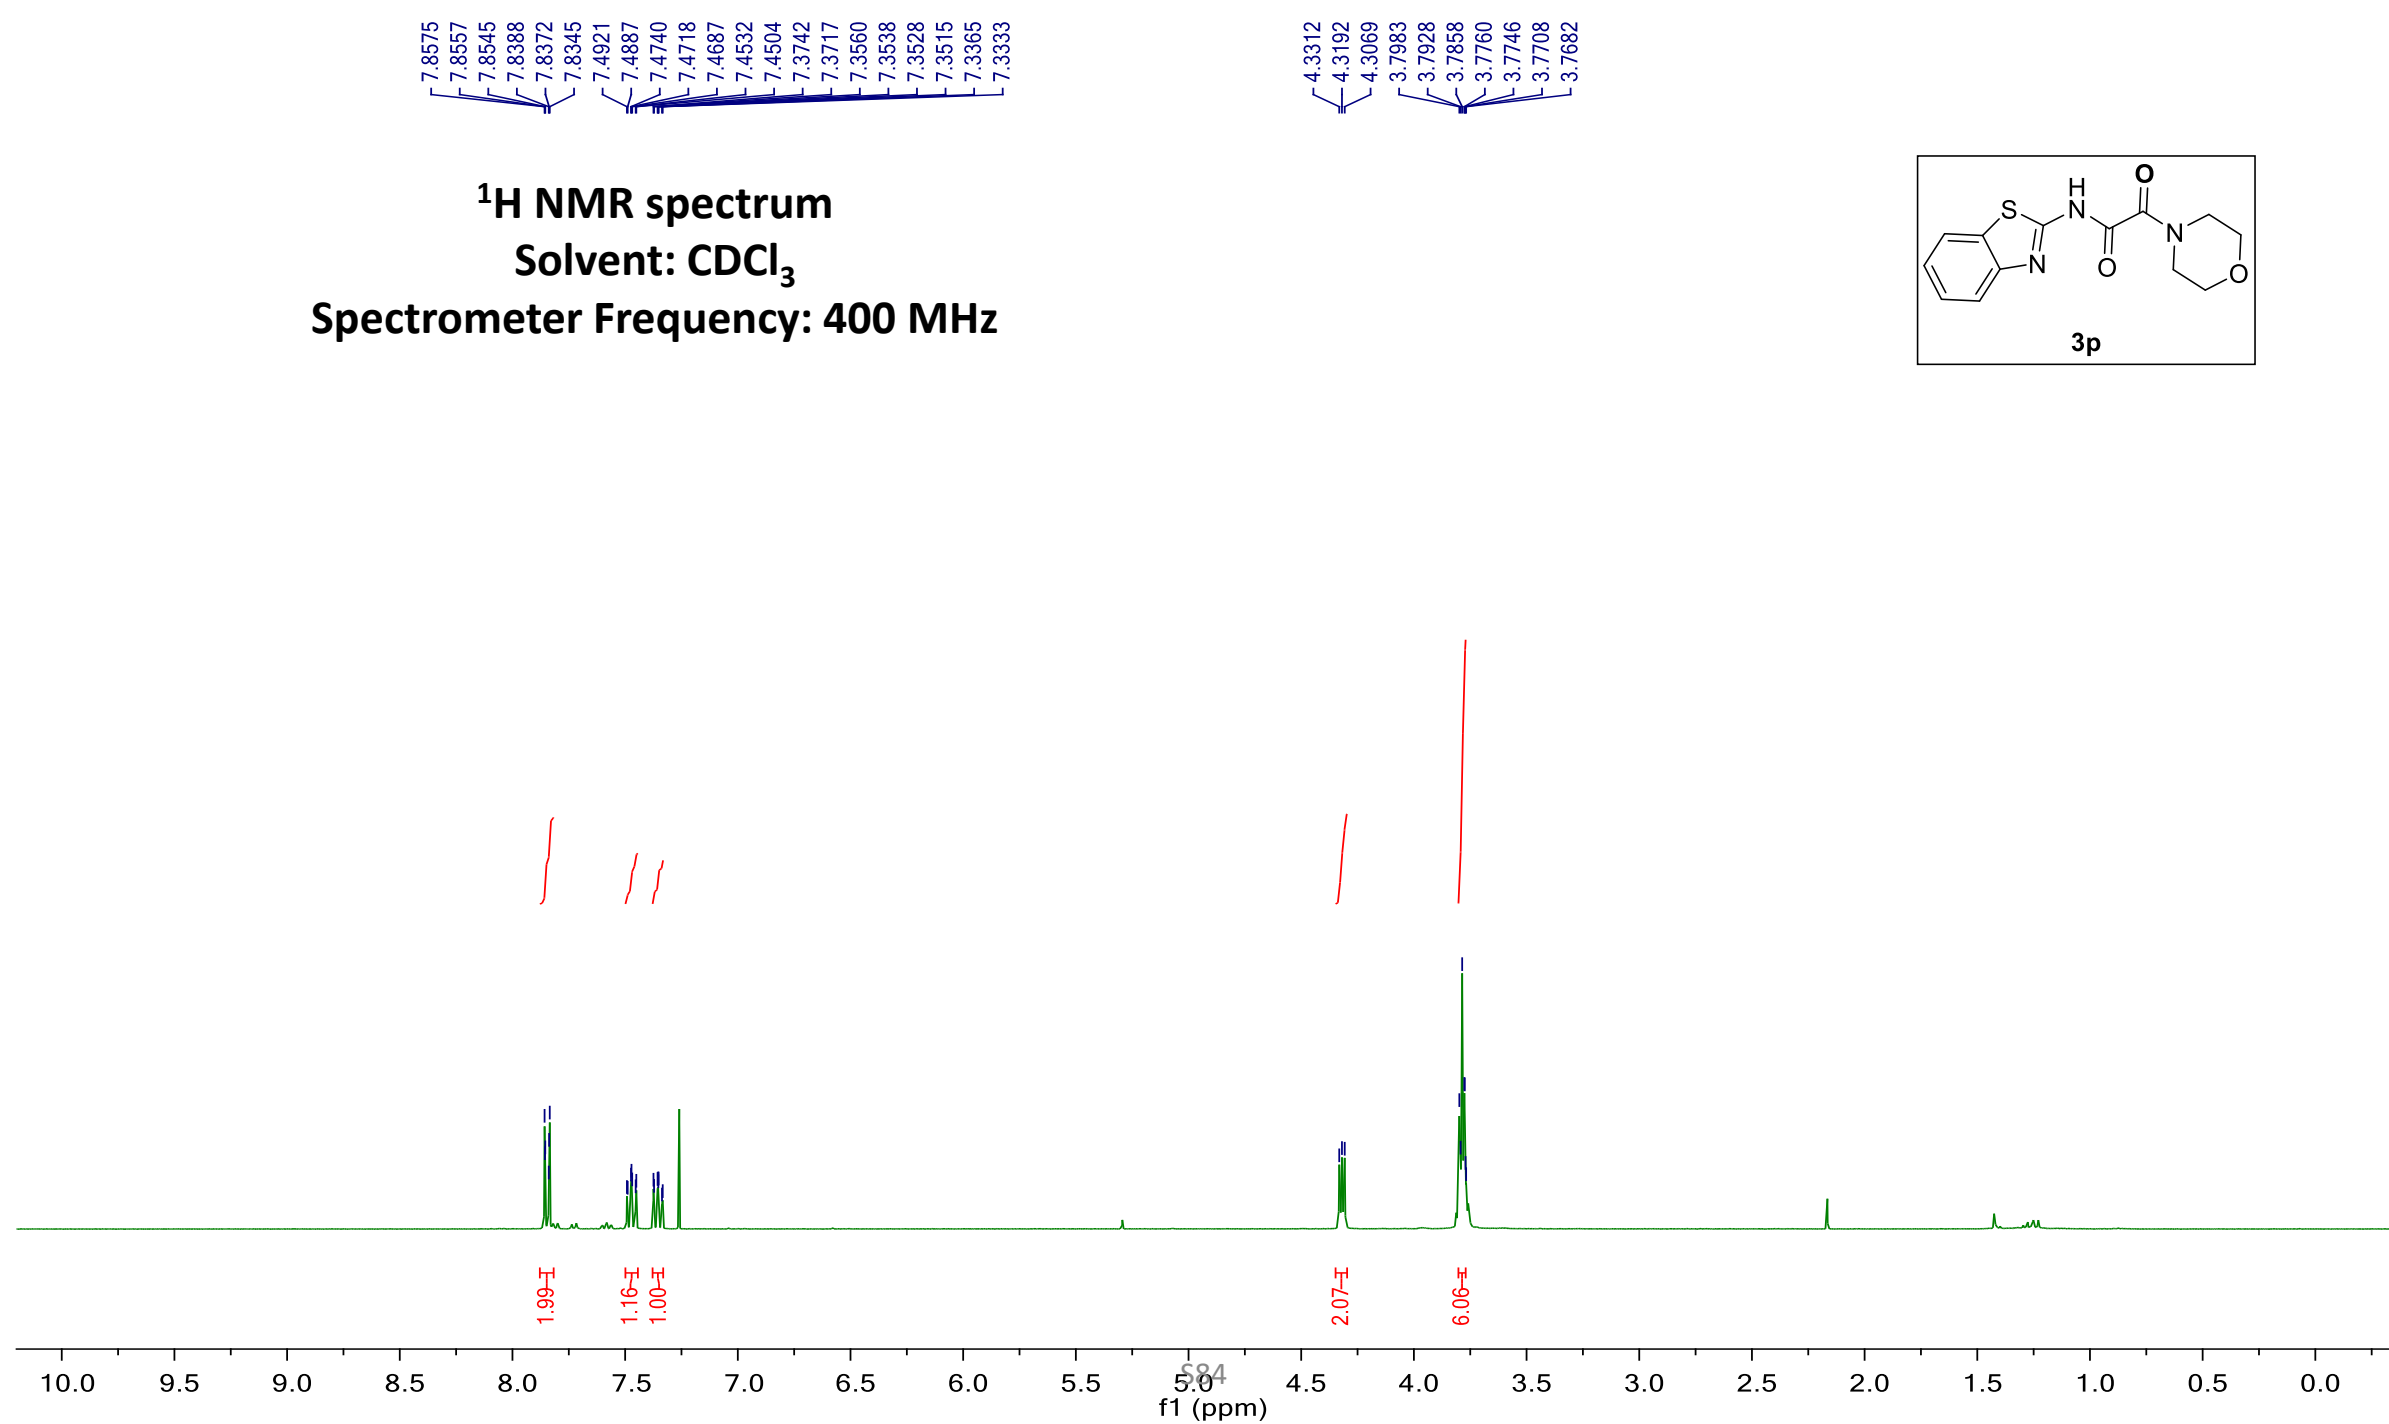

**$^{13}\text{C}$   $\{^1\text{H}\}$  NMR spectrum**  
**Solvent:  $\text{CDCl}_3$**   
**Spectrometer Frequency: 100 MHz**



158.2998  
157.7829  
156.1717

148.4960

132.1771

126.4914  
124.4871  
121.6049  
121.4013

67.0780  
66.7057

47.1029  
44.1859

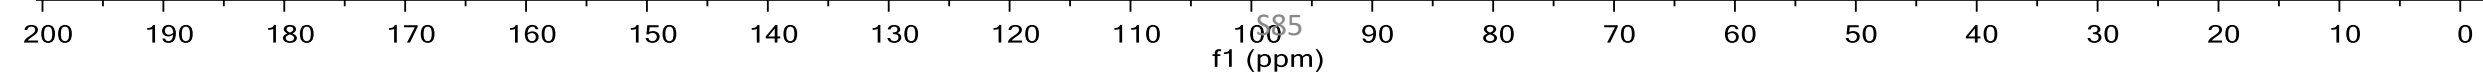

**$^1\text{H}$  NMR spectrum**  
**Solvent:  $\text{CDCl}_3$**   
**Spectrometer Frequency: 400 MHz**

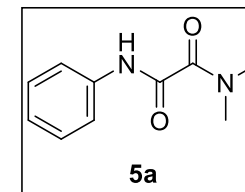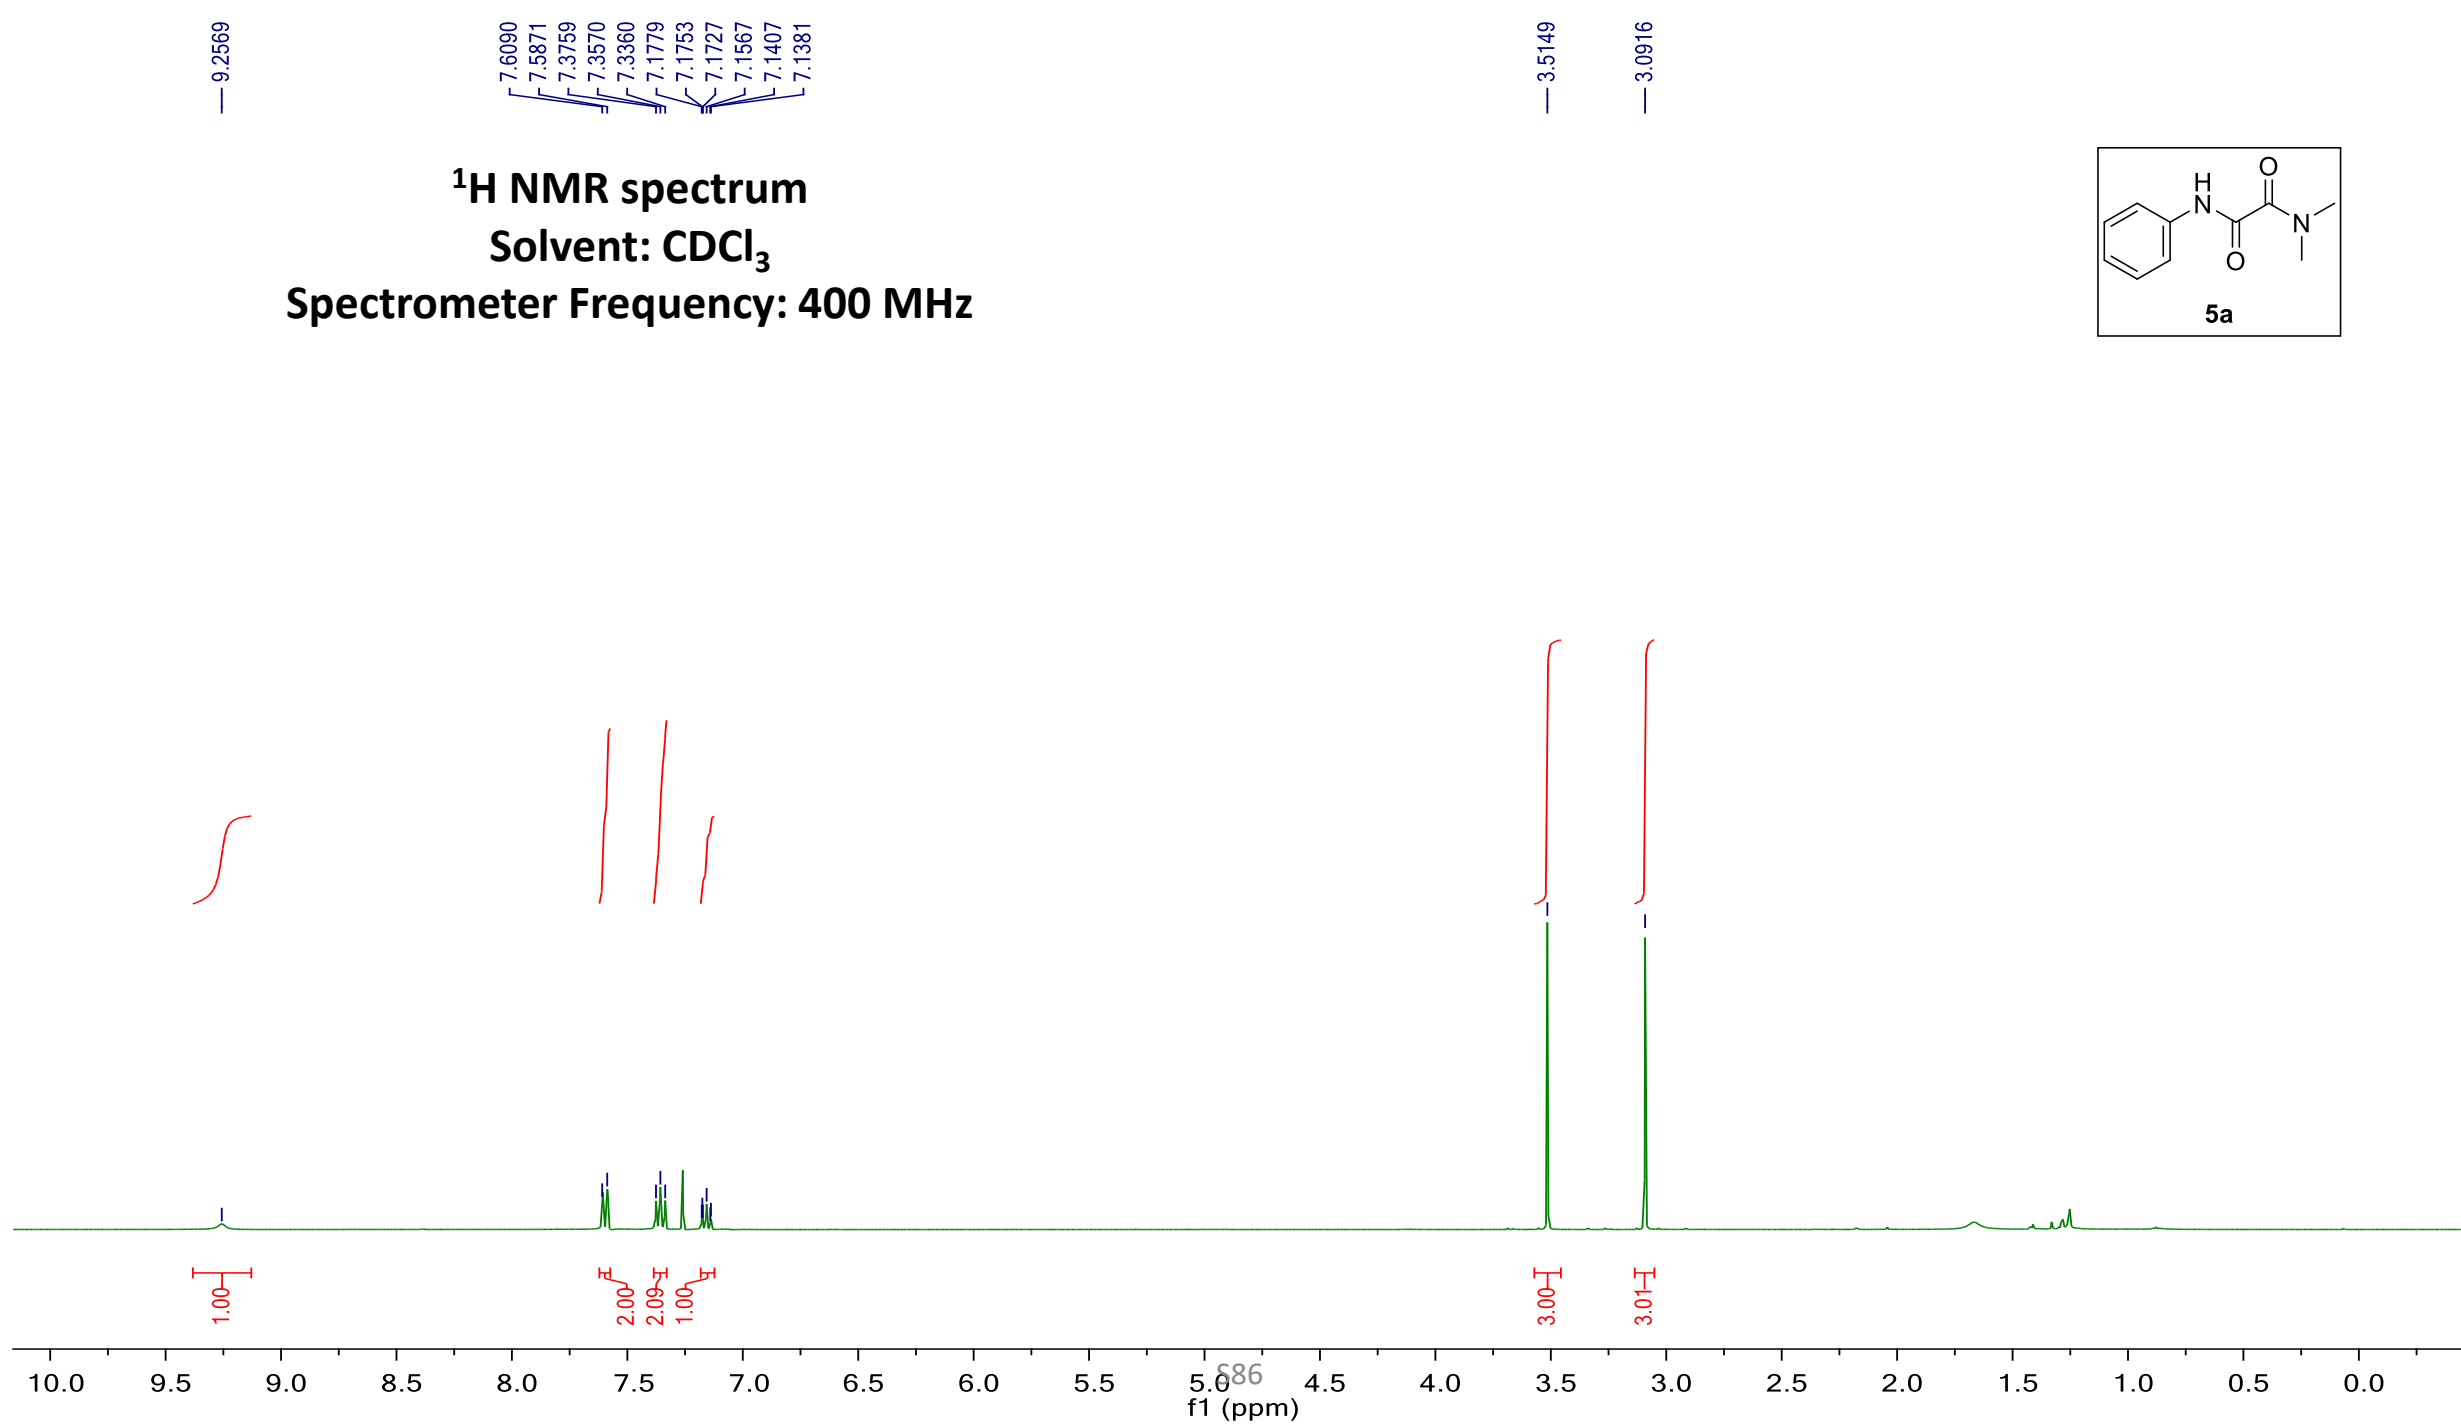

**$^{13}\text{C}$   $\{^1\text{H}\}$  NMR spectrum**  
**Solvent:  $\text{CDCl}_3$**   
**Spectrometer Frequency: 100 MHz**

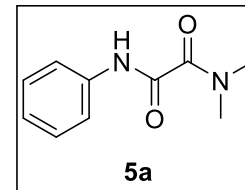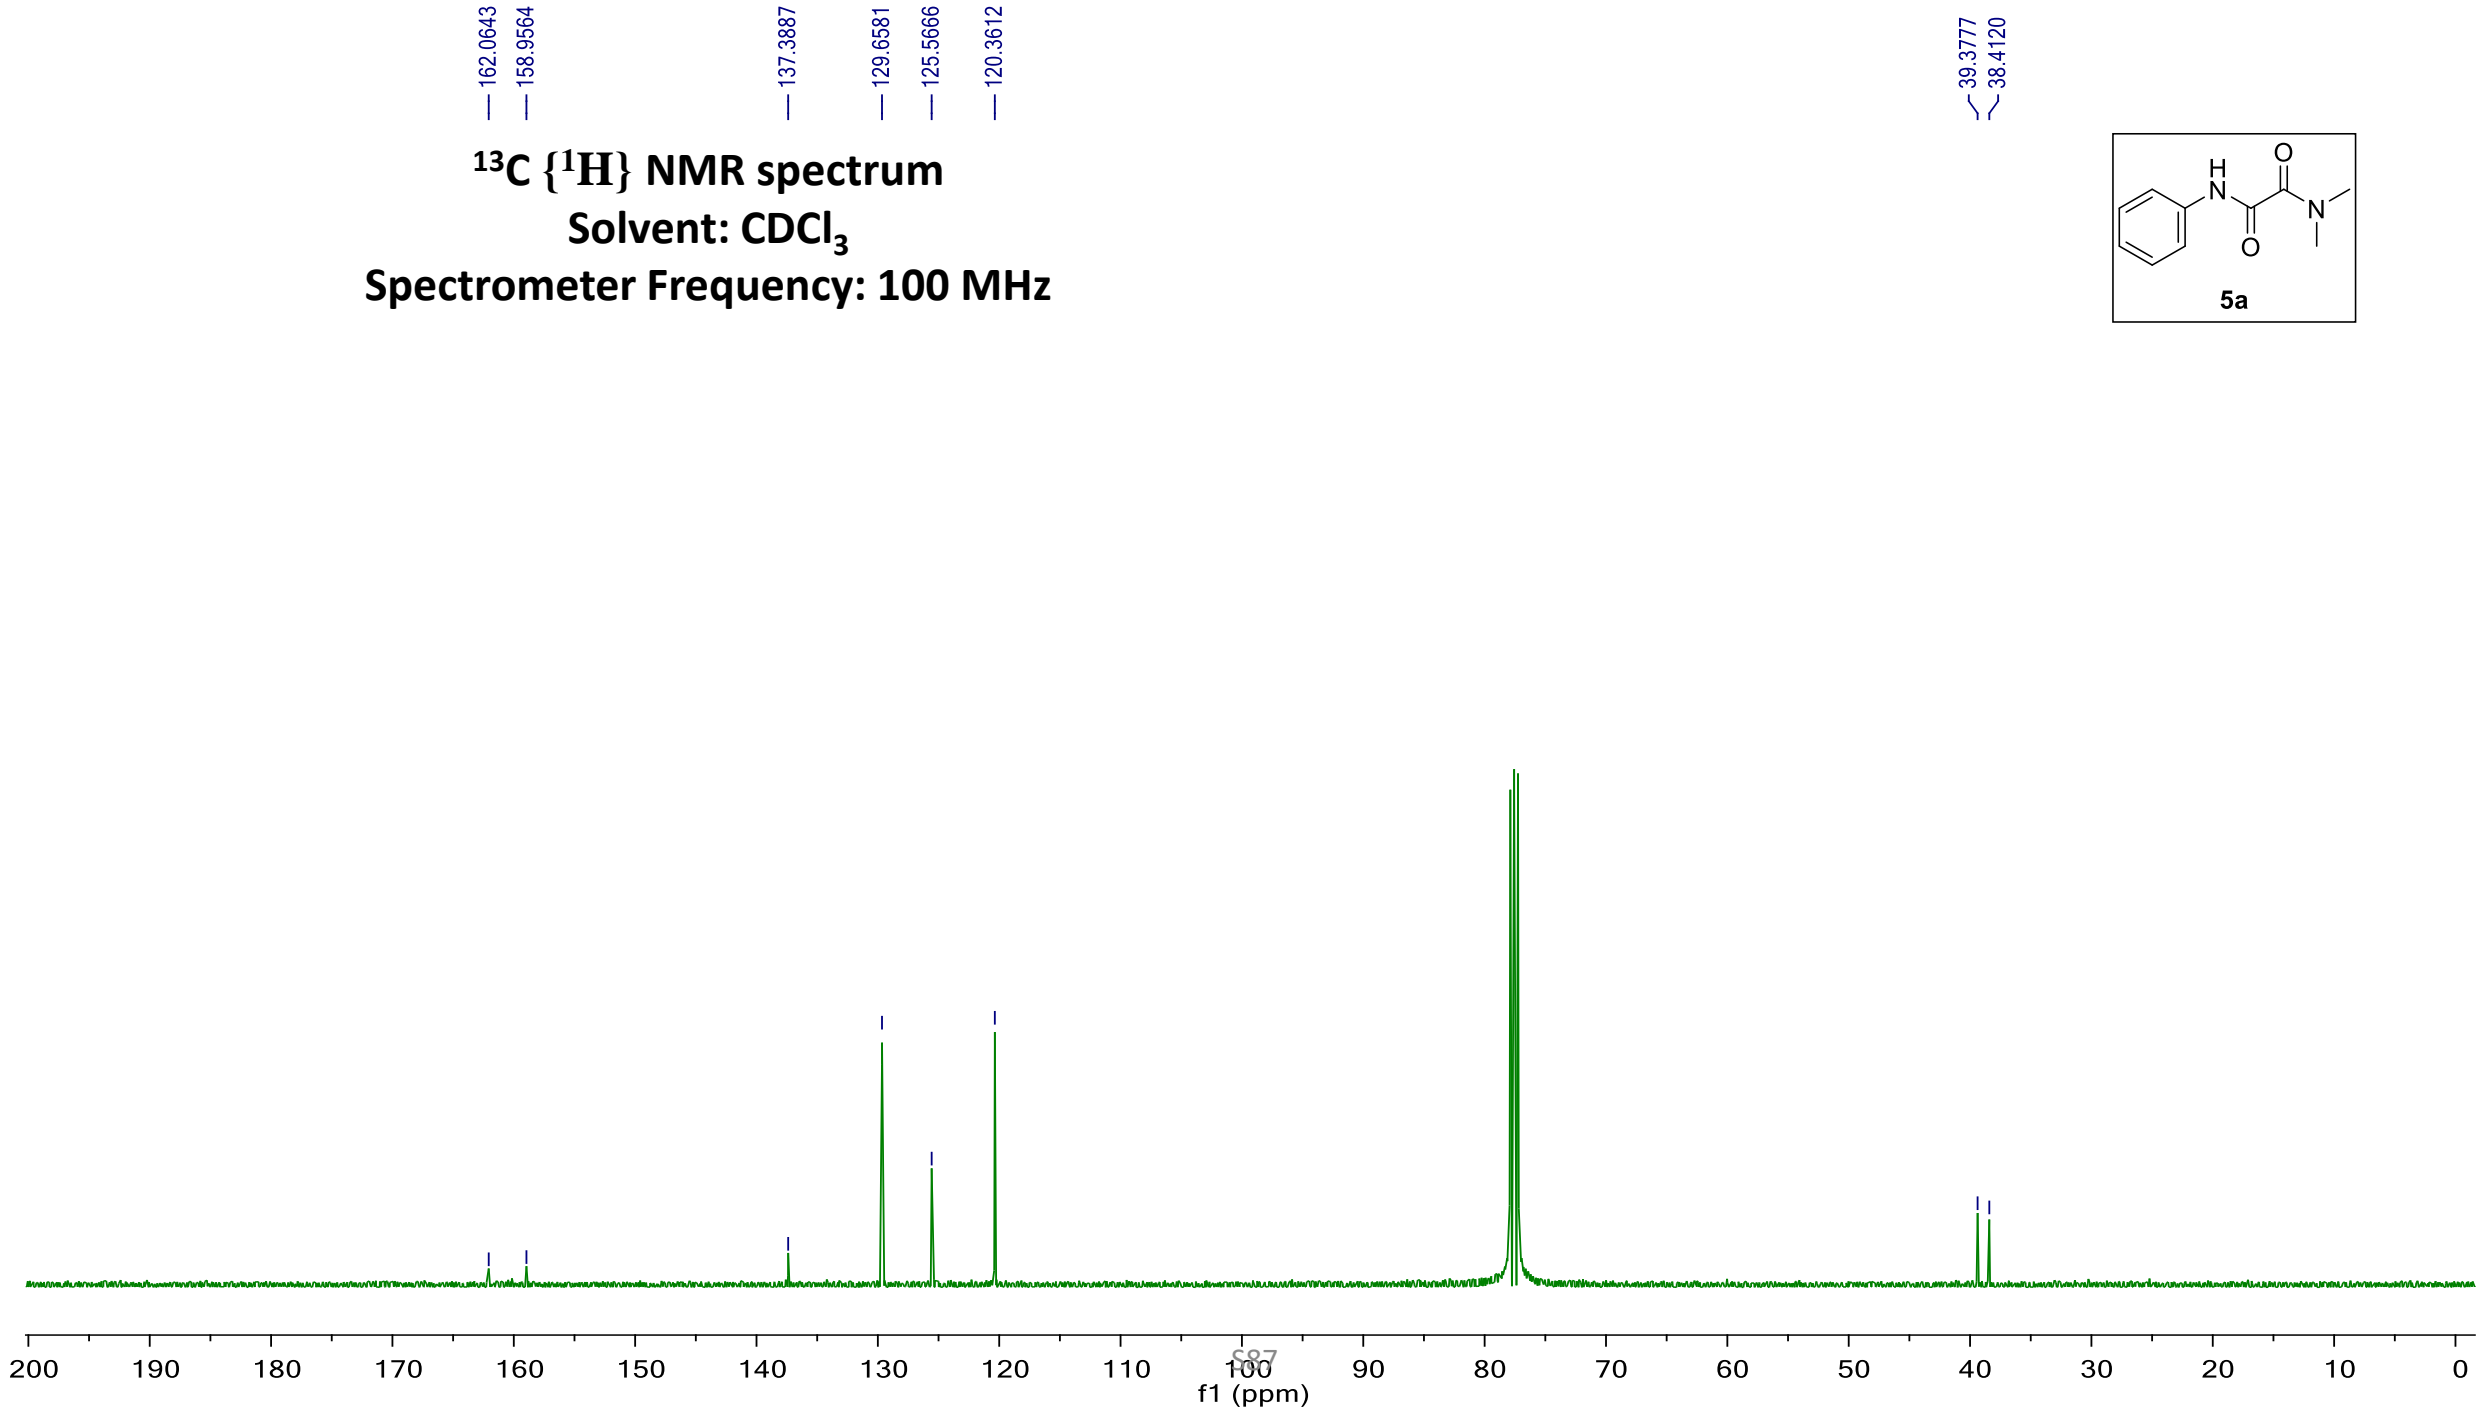

# <sup>1</sup>H NMR spectrum

Solvent: CDCl<sub>3</sub>

Spectrometer Frequency: 400 MHz

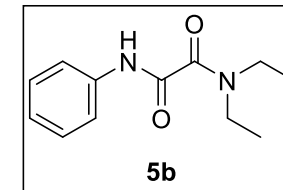

7.6134  
7.6104  
7.5916  
7.5890  
7.3541  
7.3353  
7.3331  
7.3141  
7.1549  
7.1520  
7.1492  
7.1370  
7.1335  
7.1316  
7.1298  
7.1177  
7.1148

3.8616  
3.8440  
3.8263  
3.8088  
3.4783  
3.4605  
3.4426  
3.4248

1.3297  
1.3121  
1.2945  
1.2218  
1.2039  
1.1861

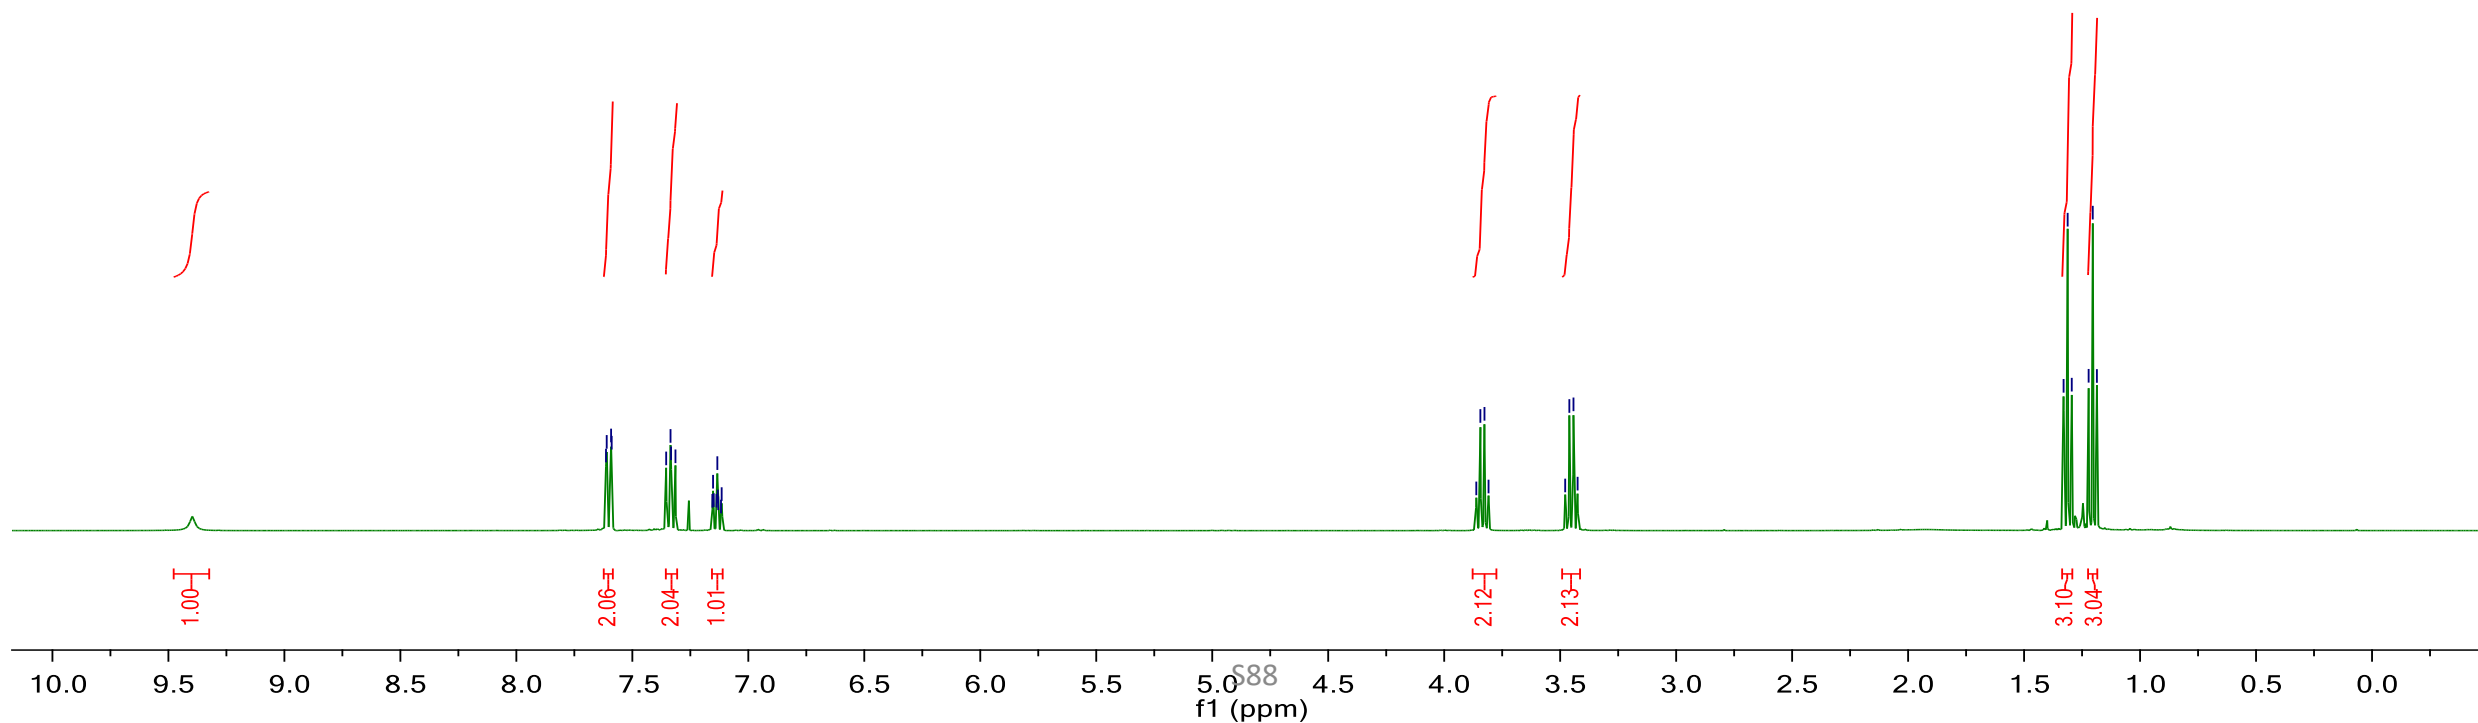

**$^{13}\text{C}$   $\{^1\text{H}\}$  NMR spectrum**  
**Solvent:  $\text{CDCl}_3$**   
**Spectrometer Frequency: 100 MHz**

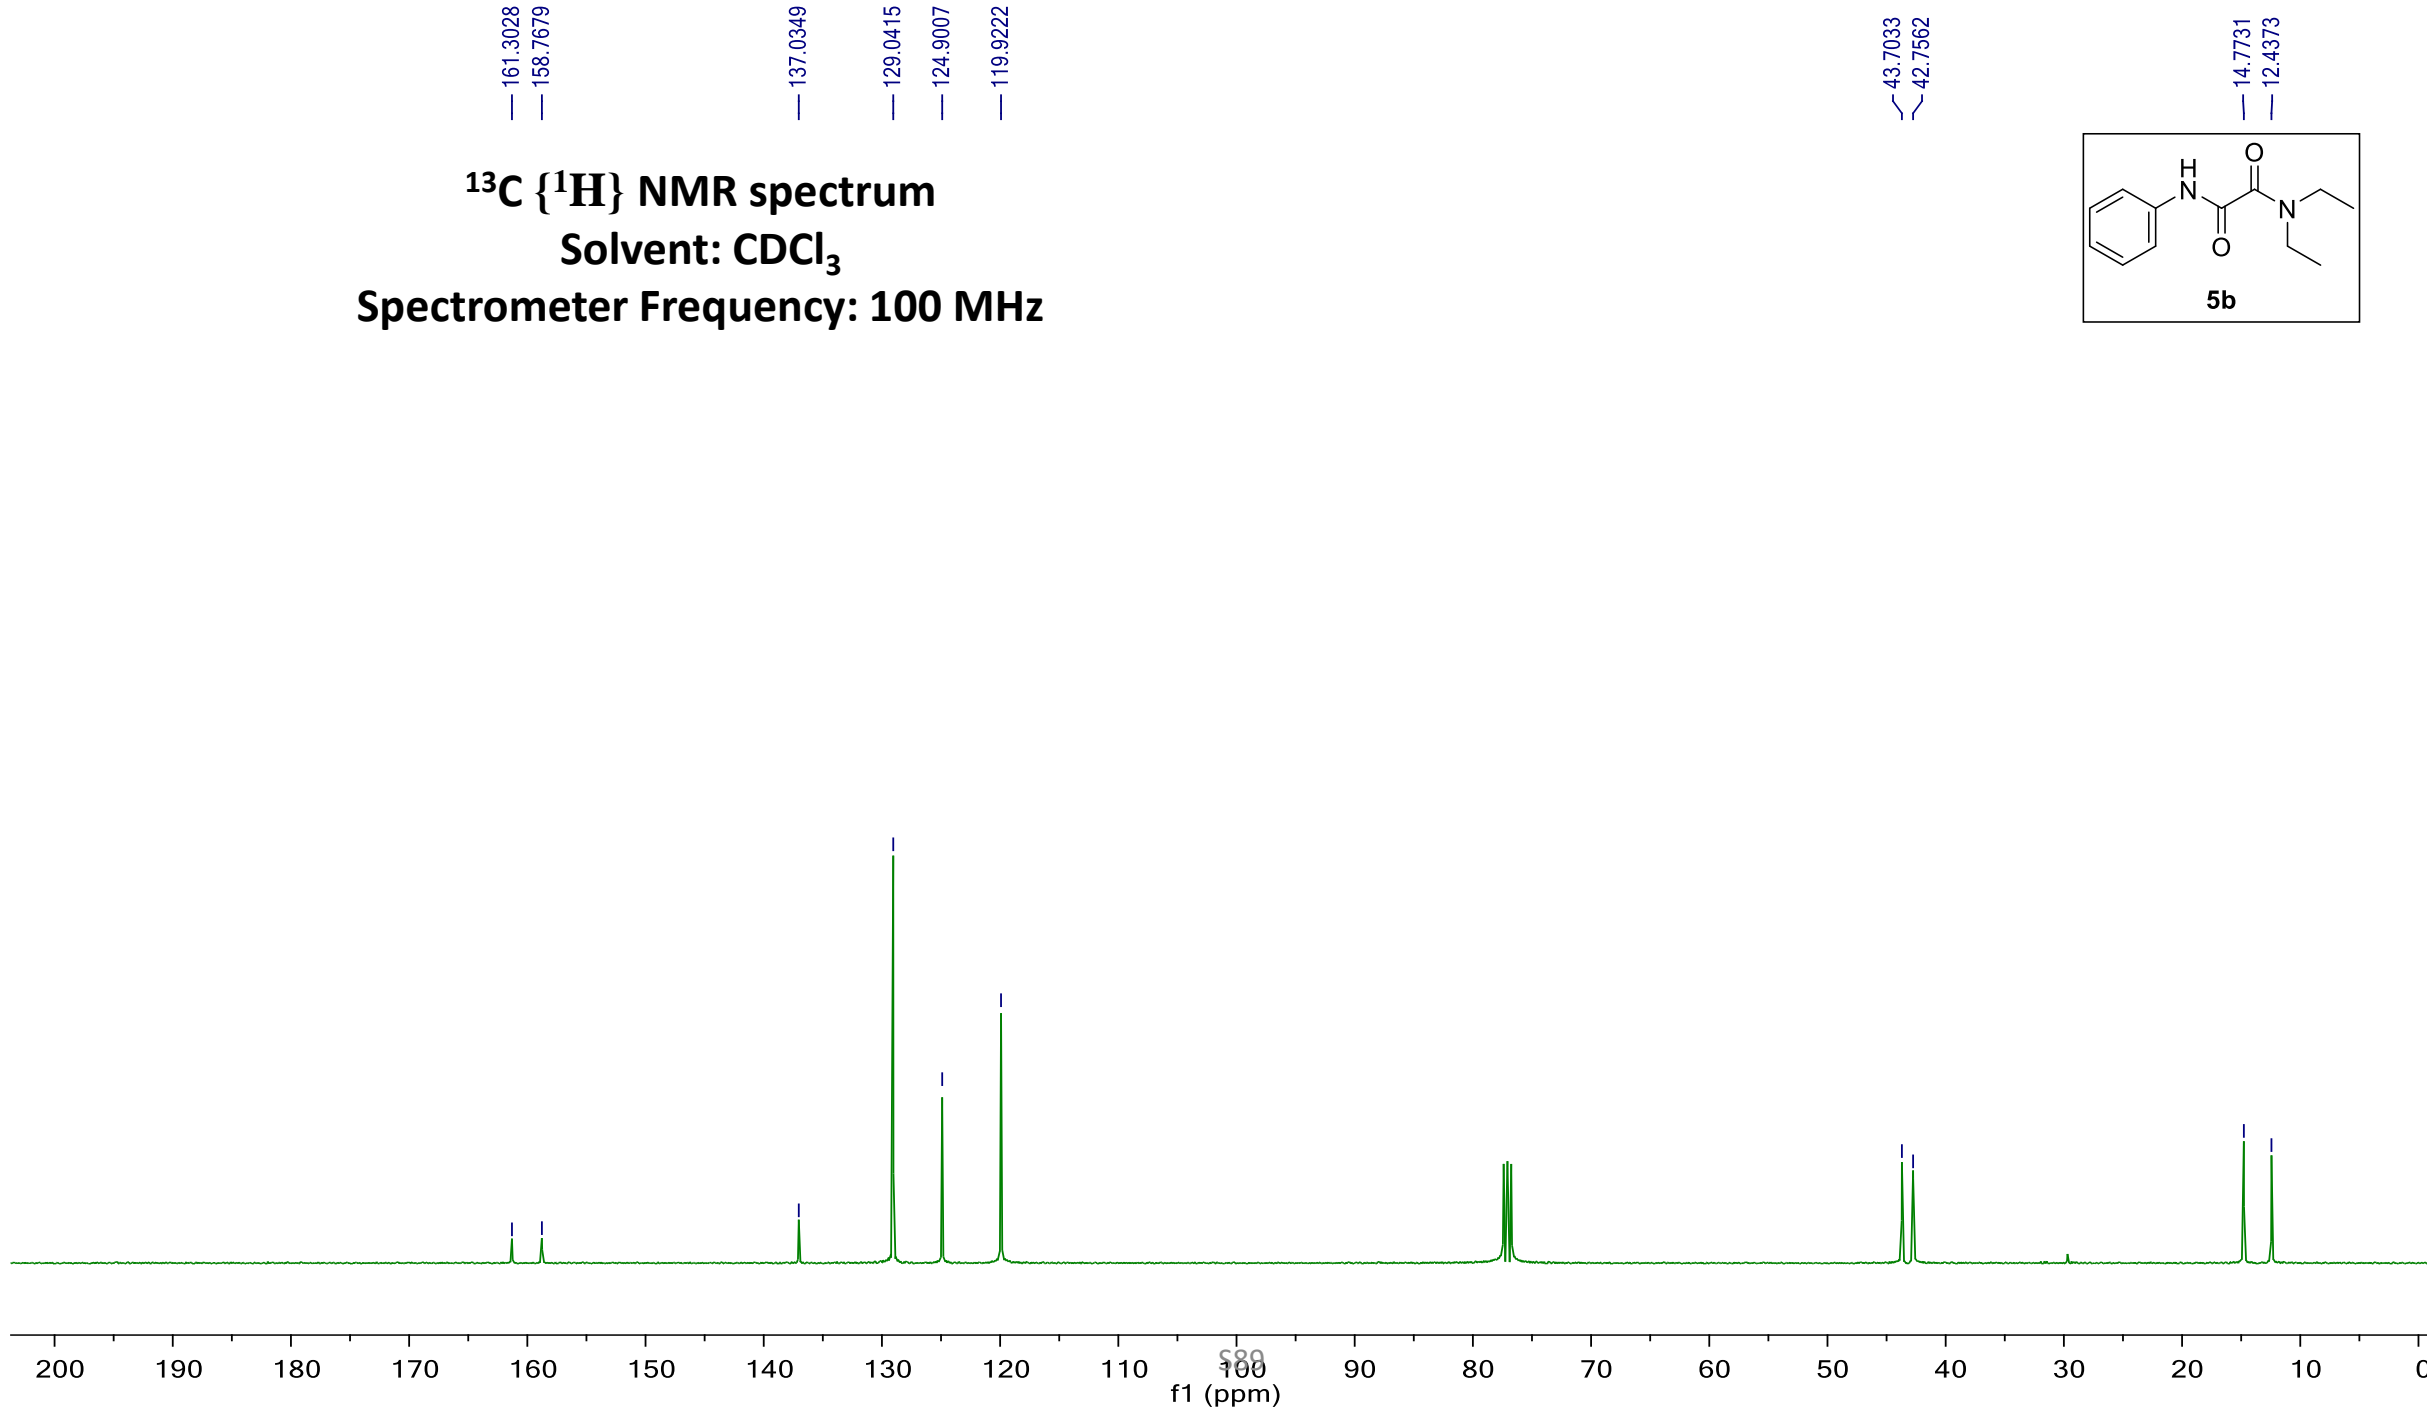

**$^1\text{H}$  NMR spectrum**  
**Solvent:  $\text{CDCl}_3$**   
**Spectrometer Frequency: 400 MHz**

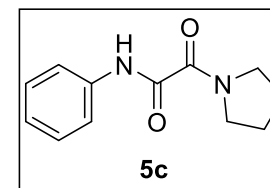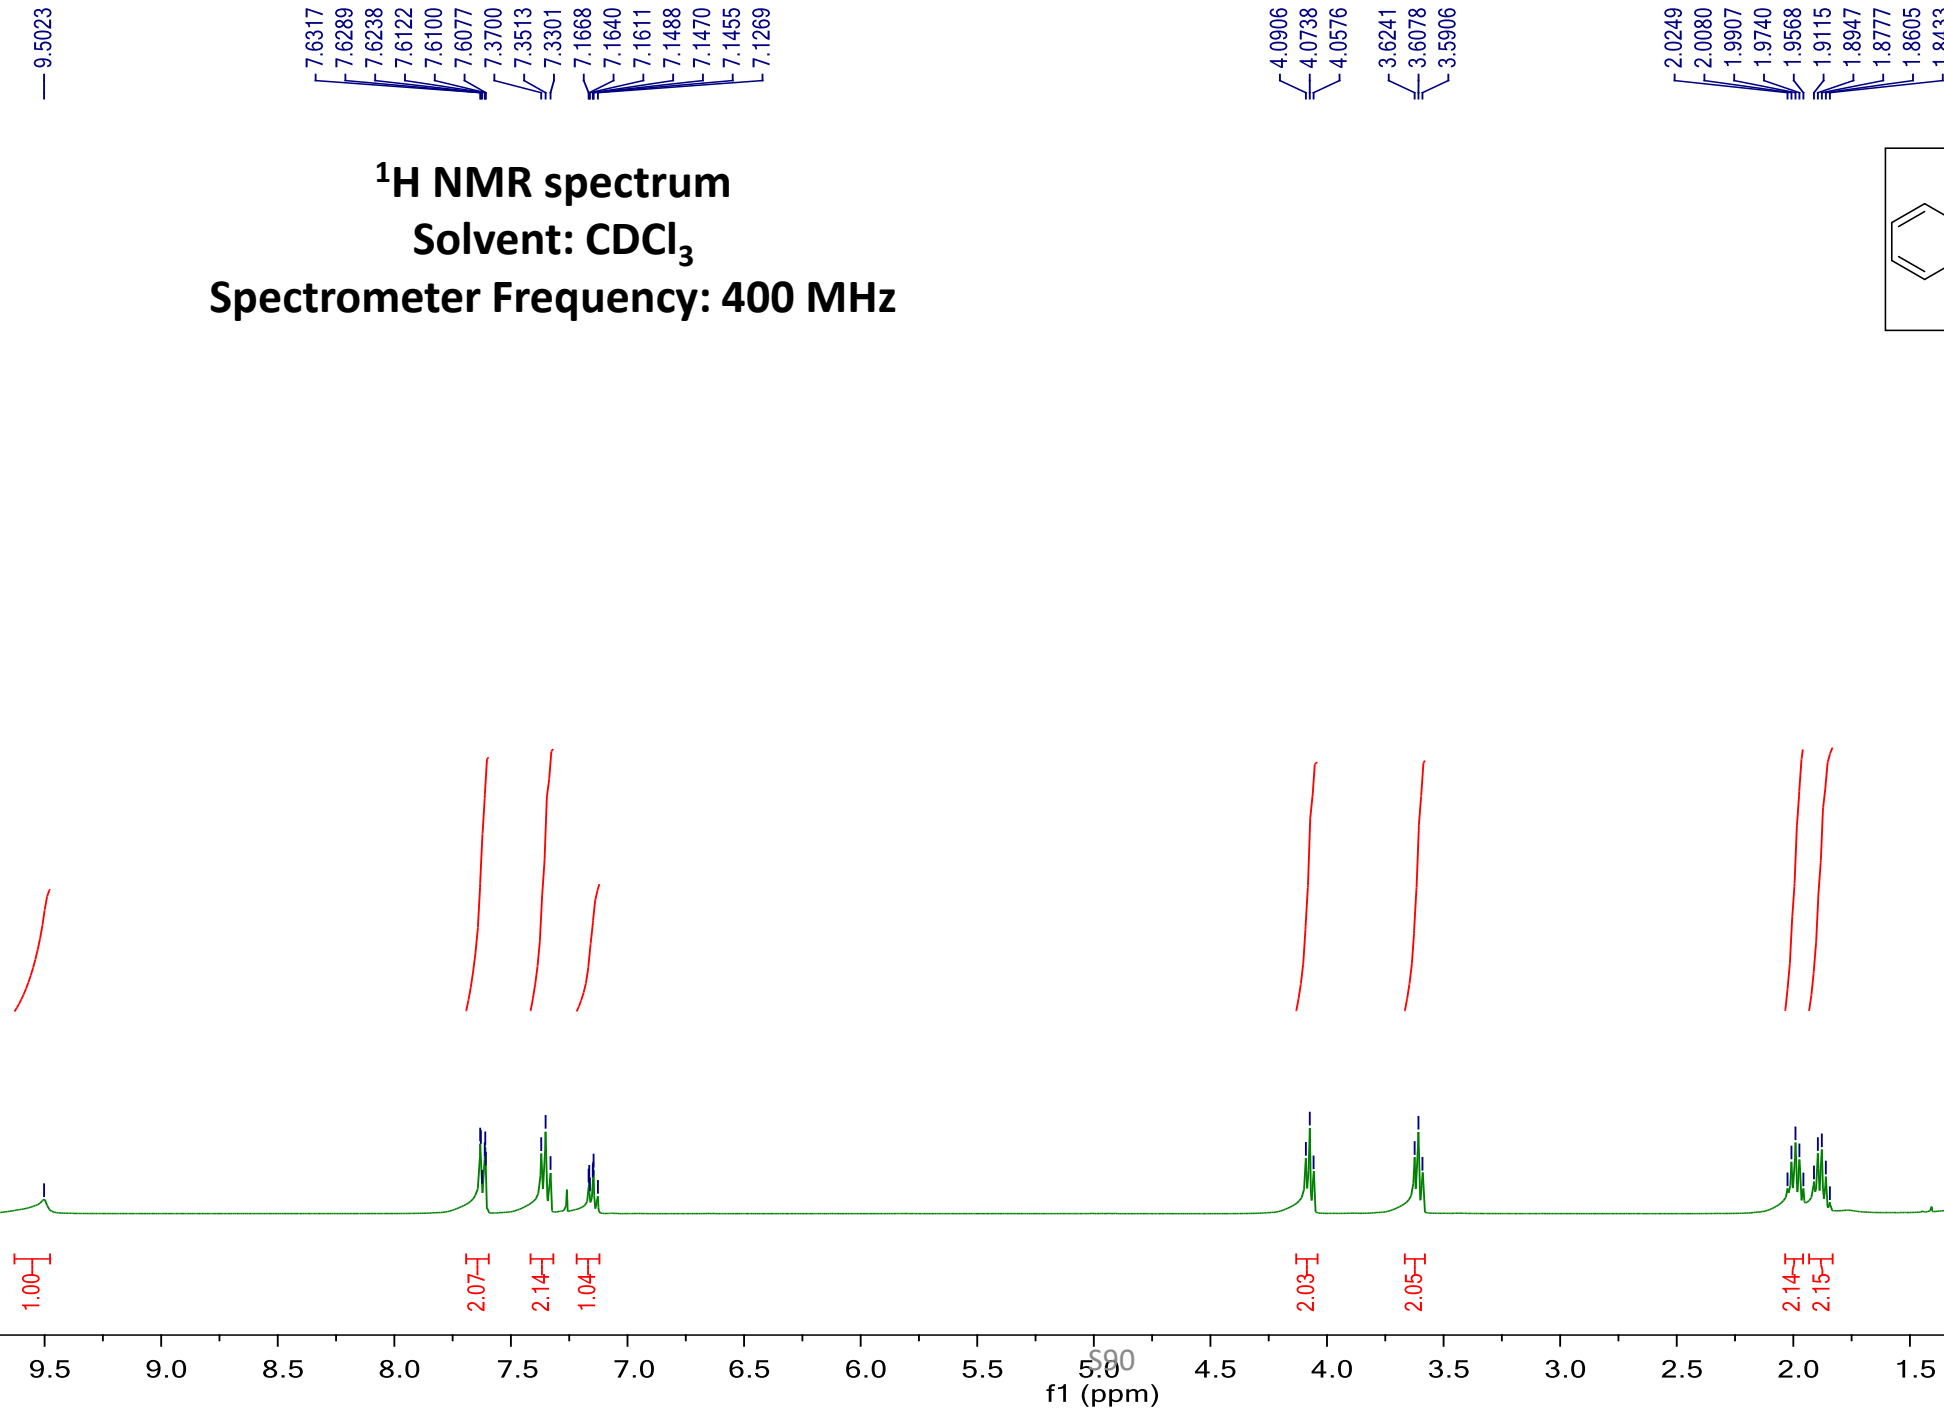

**$^{13}\text{C}$   $\{^1\text{H}\}$  NMR spectrum**  
**Solvent:  $\text{CDCl}_3$**   
**Spectrometer Frequency: 100 MHz**

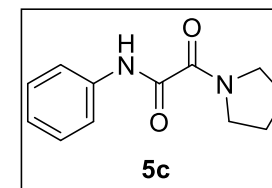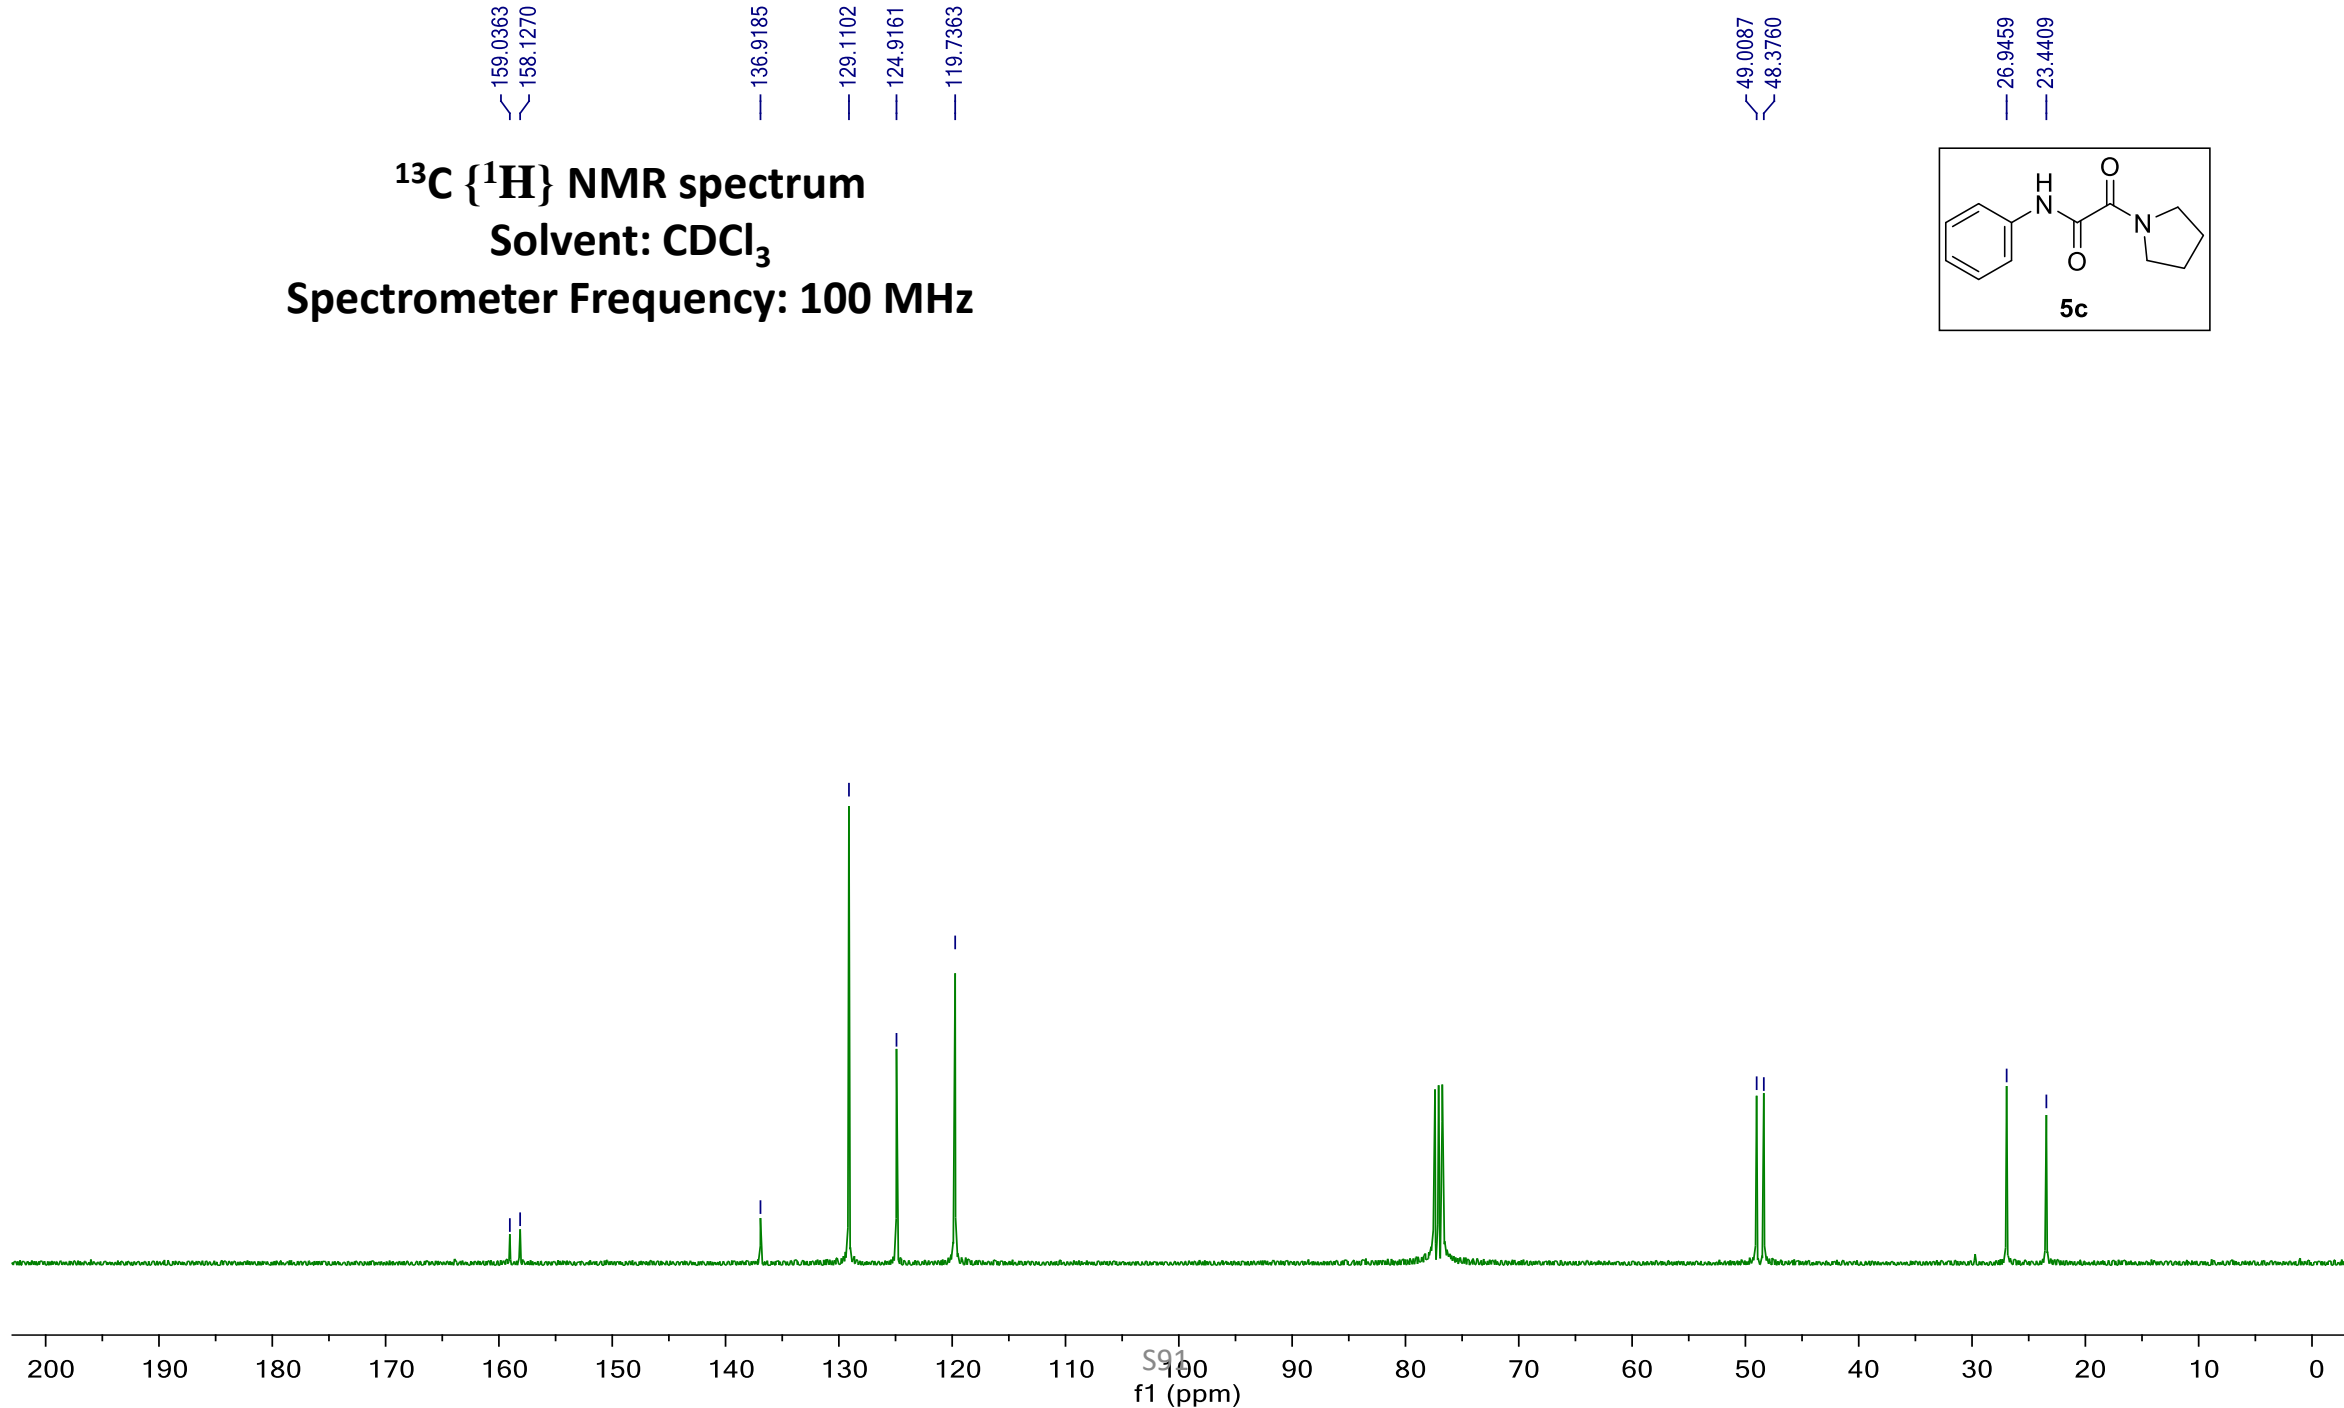

**$^1\text{H}$  NMR spectrum**  
**Solvent:  $\text{CDCl}_3$**   
**Spectrometer Frequency: 400 MHz**

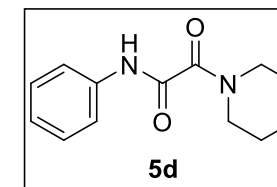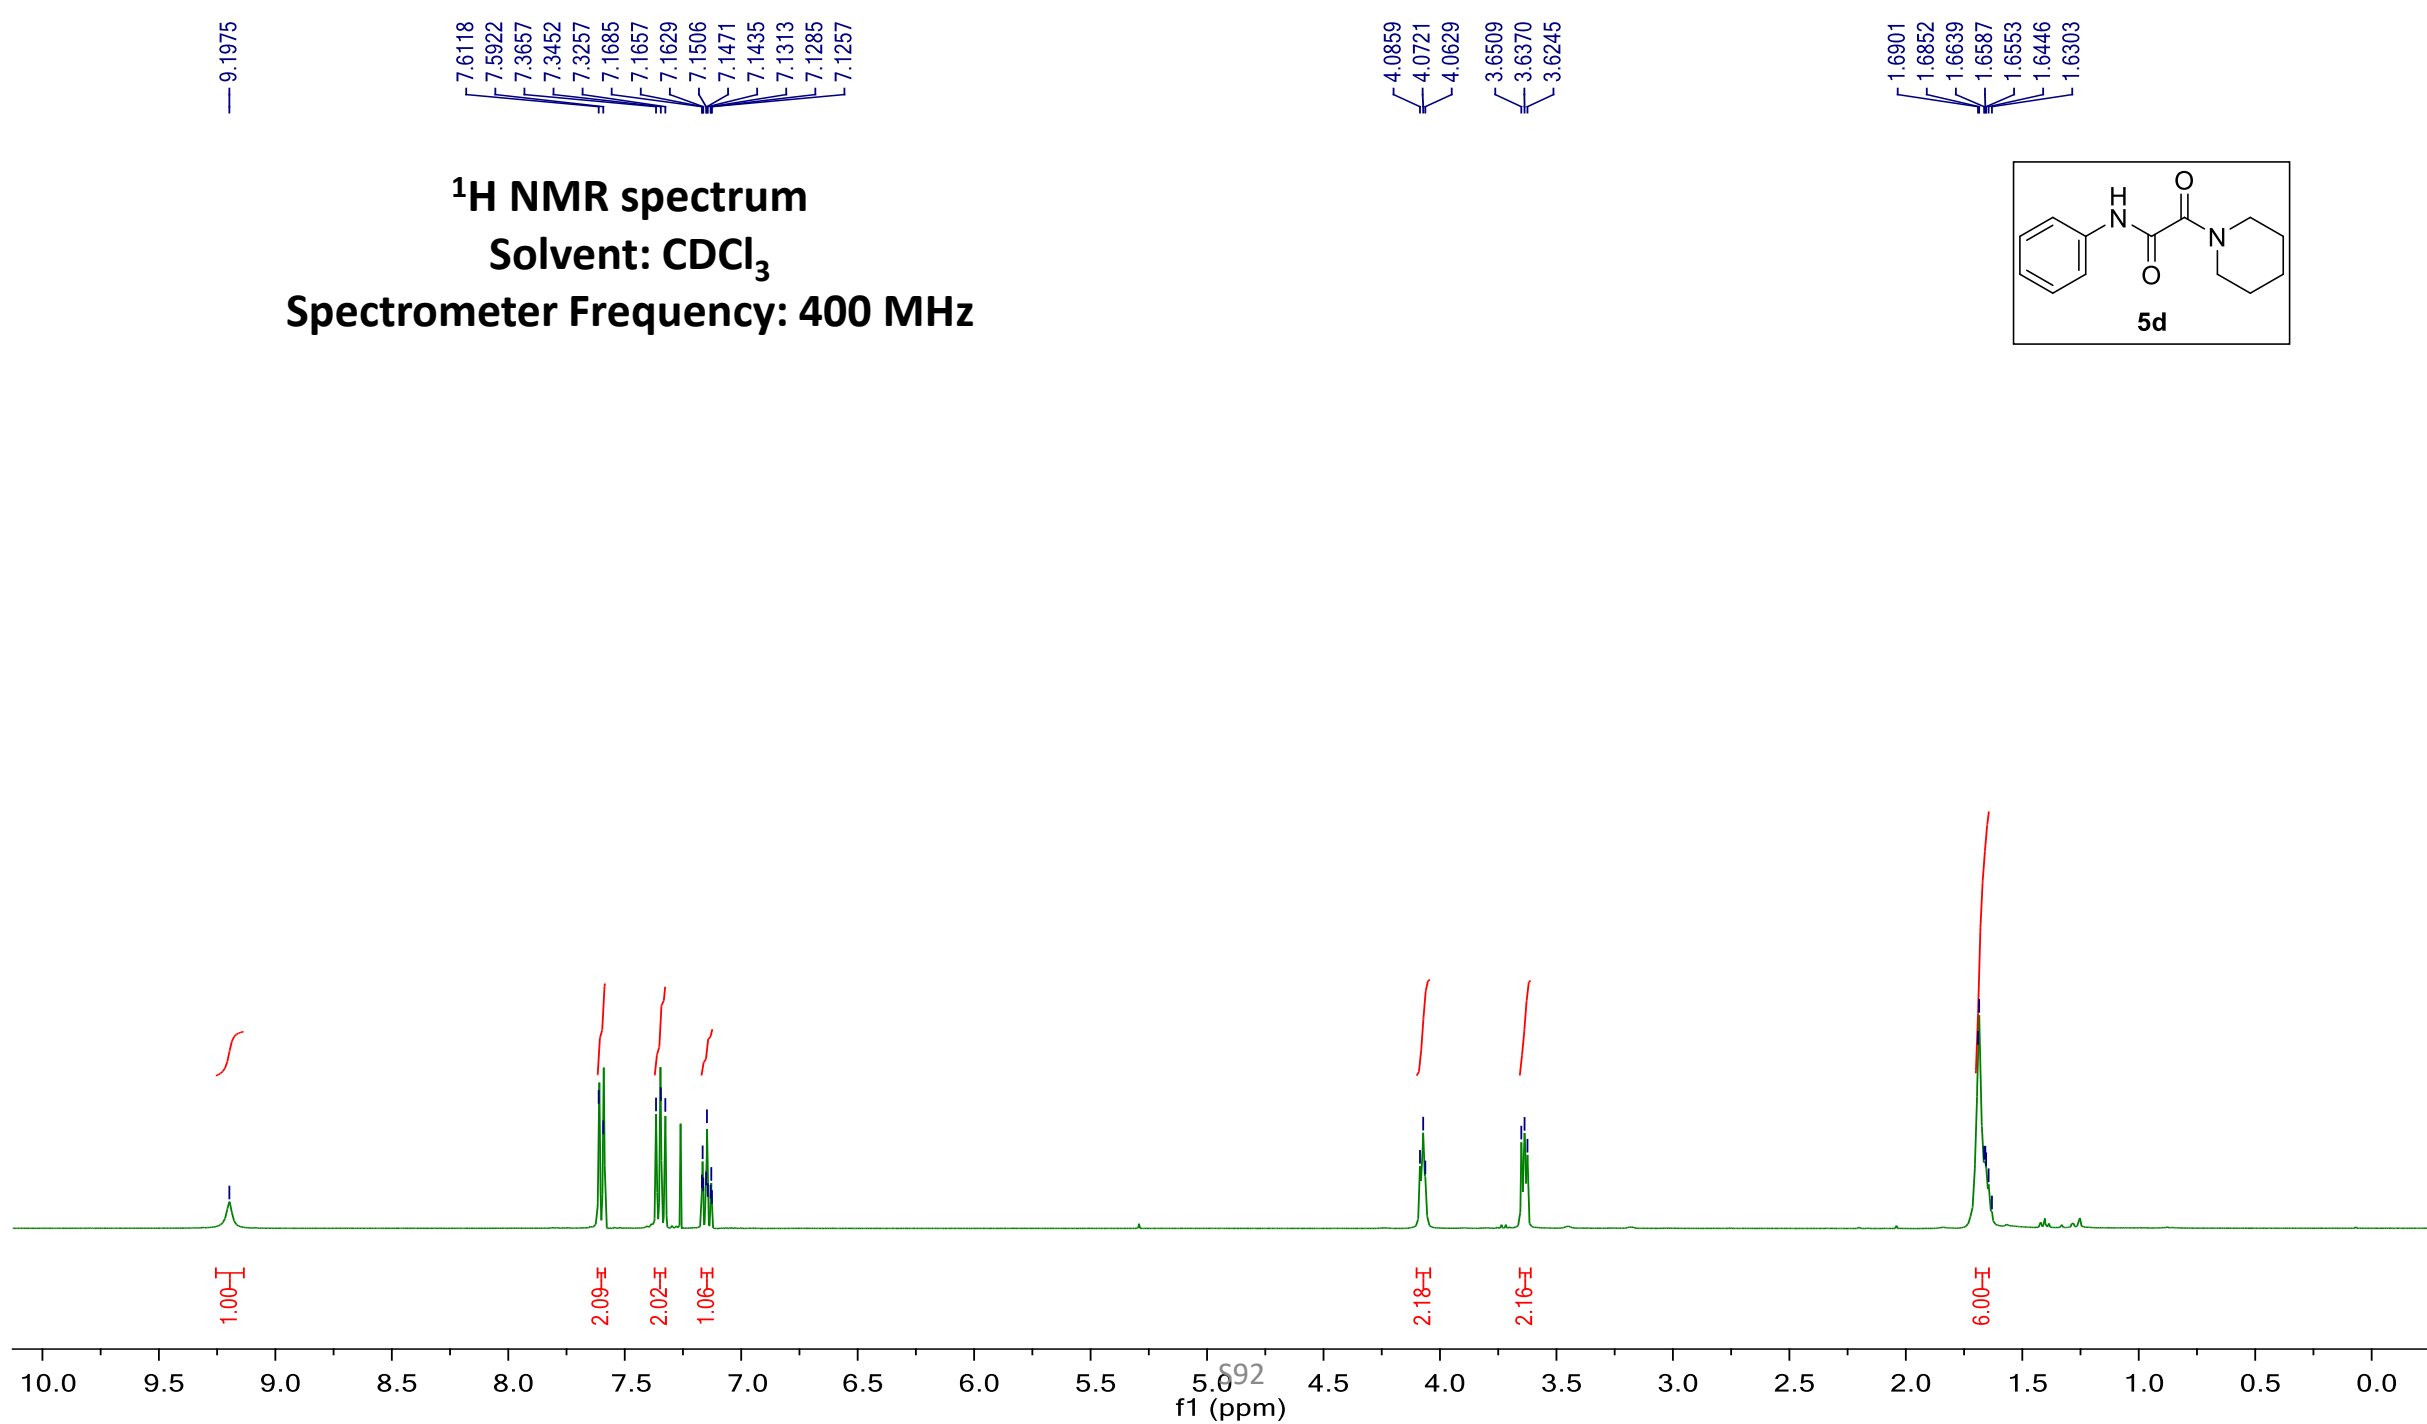

**$^{13}\text{C}$   $\{^1\text{H}\}$  NMR spectrum**  
**Solvent:  $\text{CDCl}_3$**   
**Spectrometer Frequency: 100 MHz**

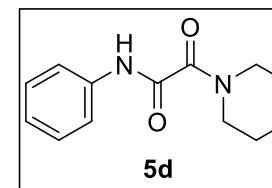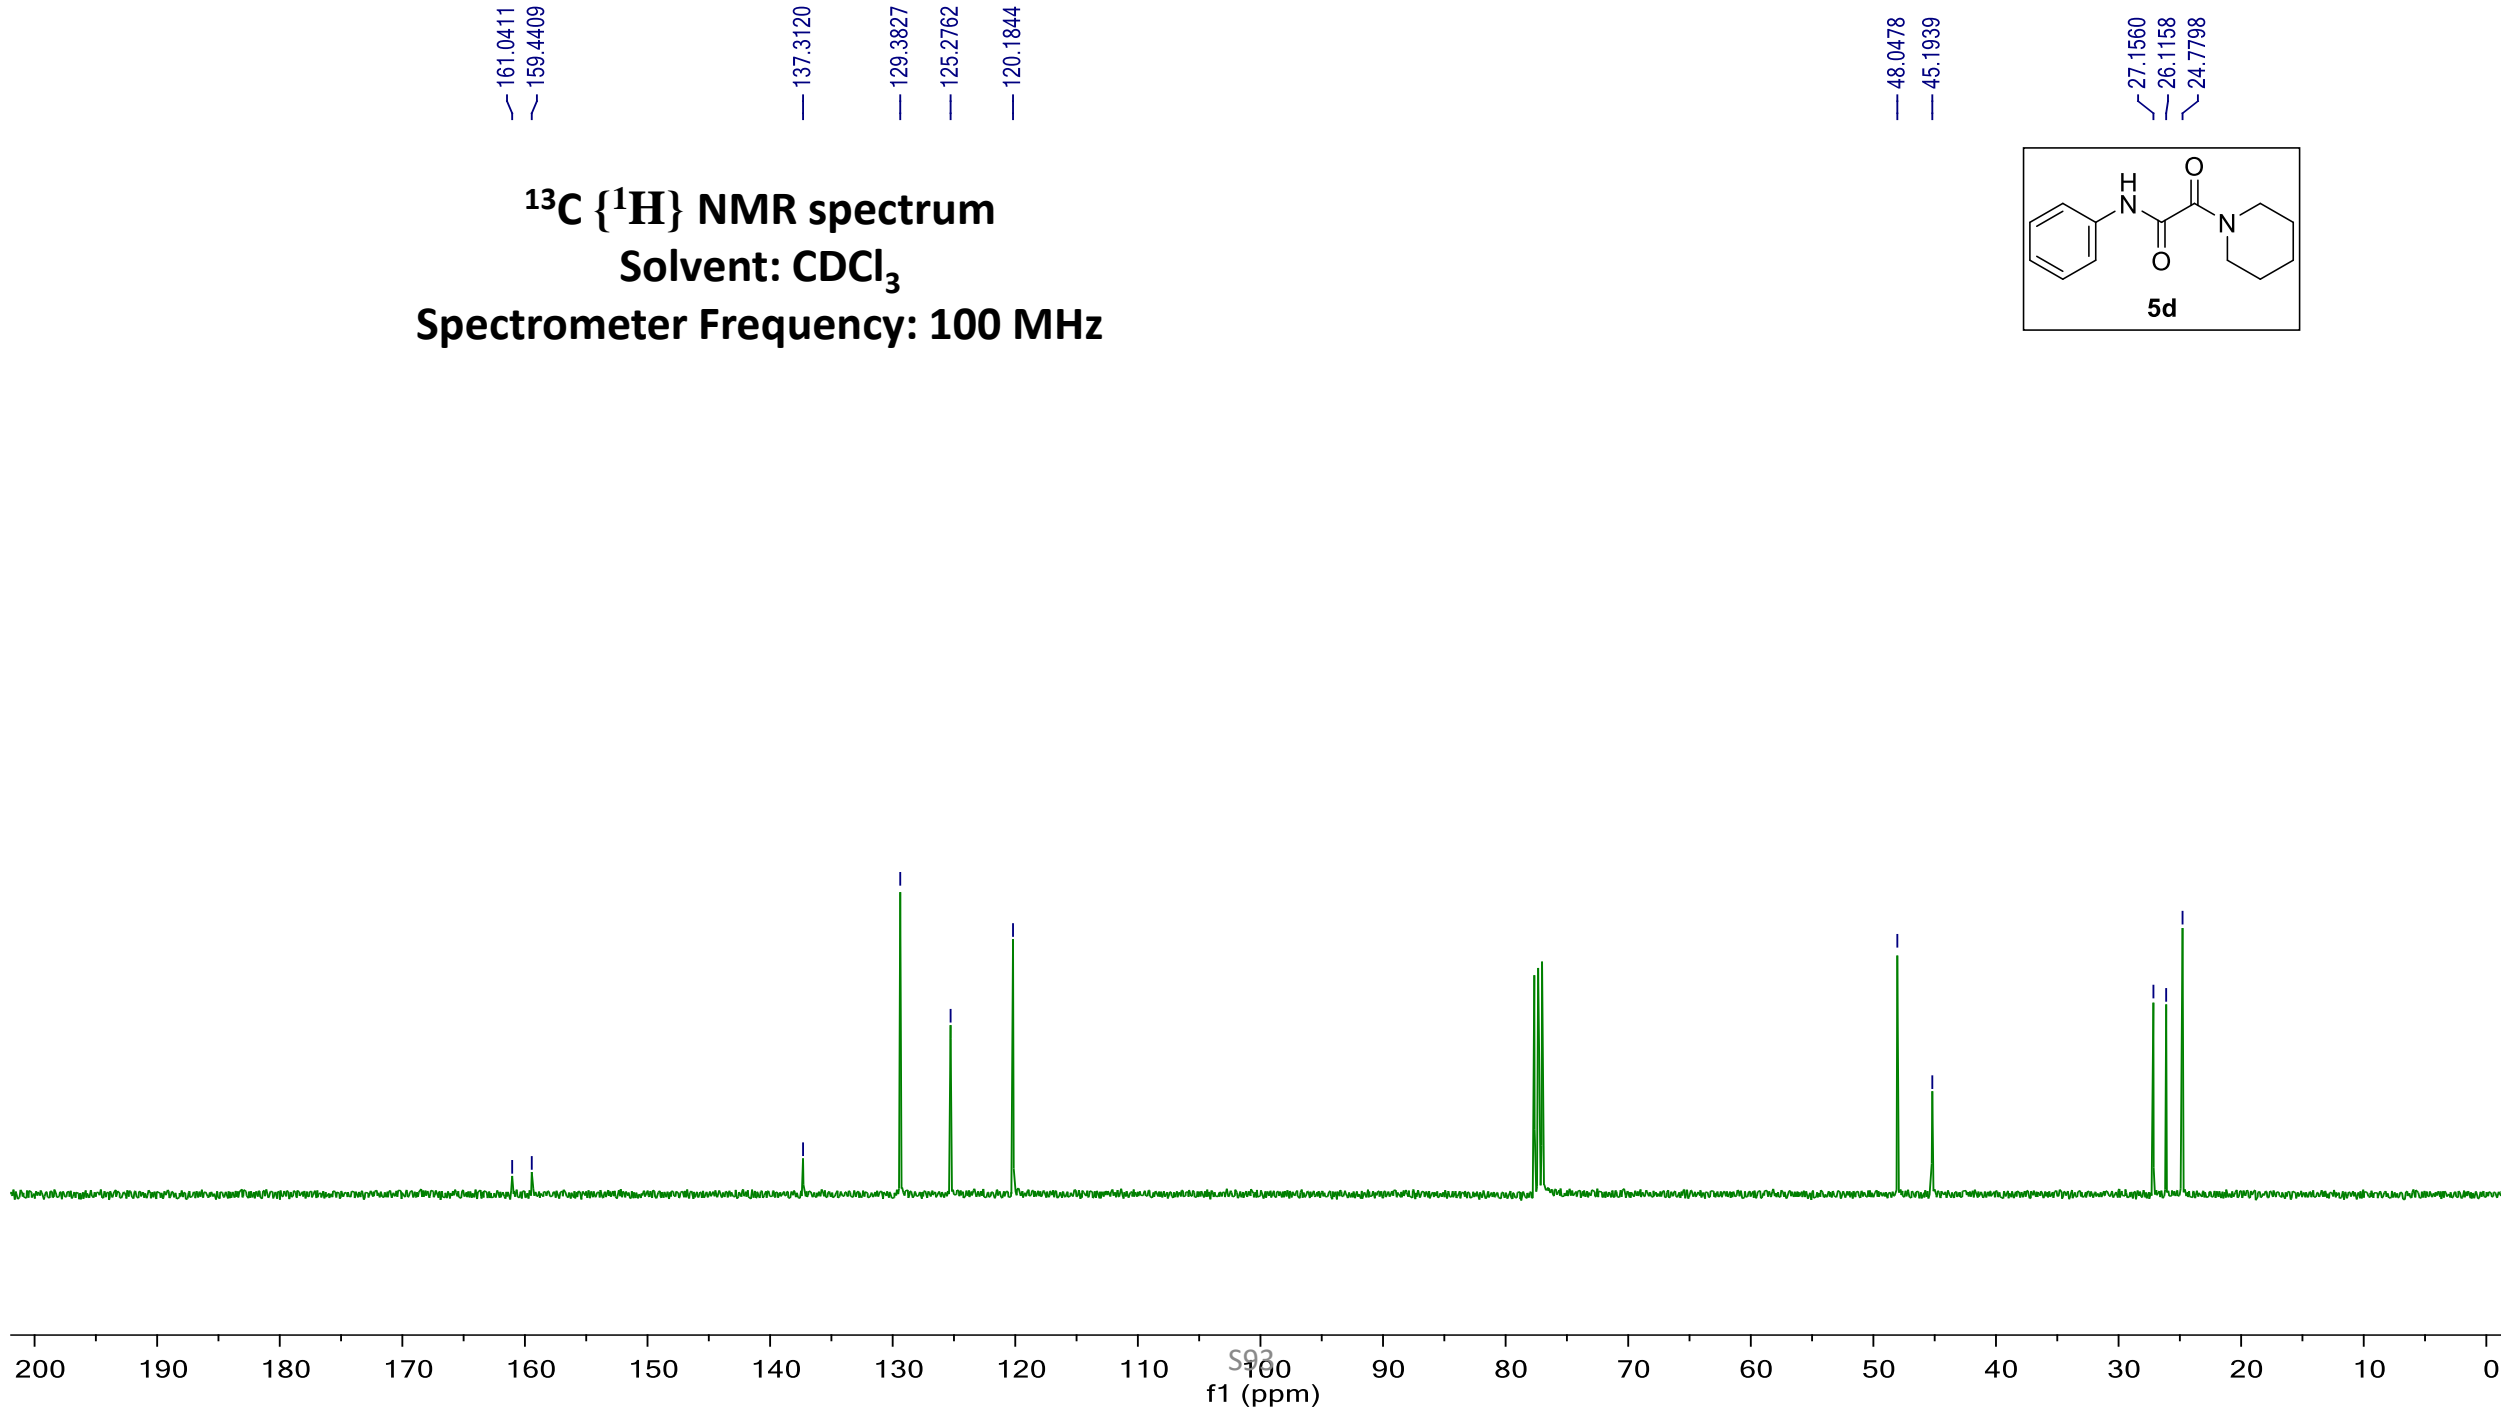

**$^1\text{H}$  NMR spectrum**  
**Solvent:  $\text{CDCl}_3$**   
**Spectrometer Frequency: 400 MHz**

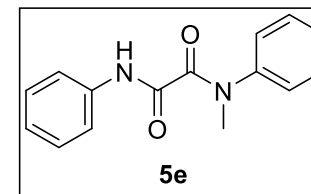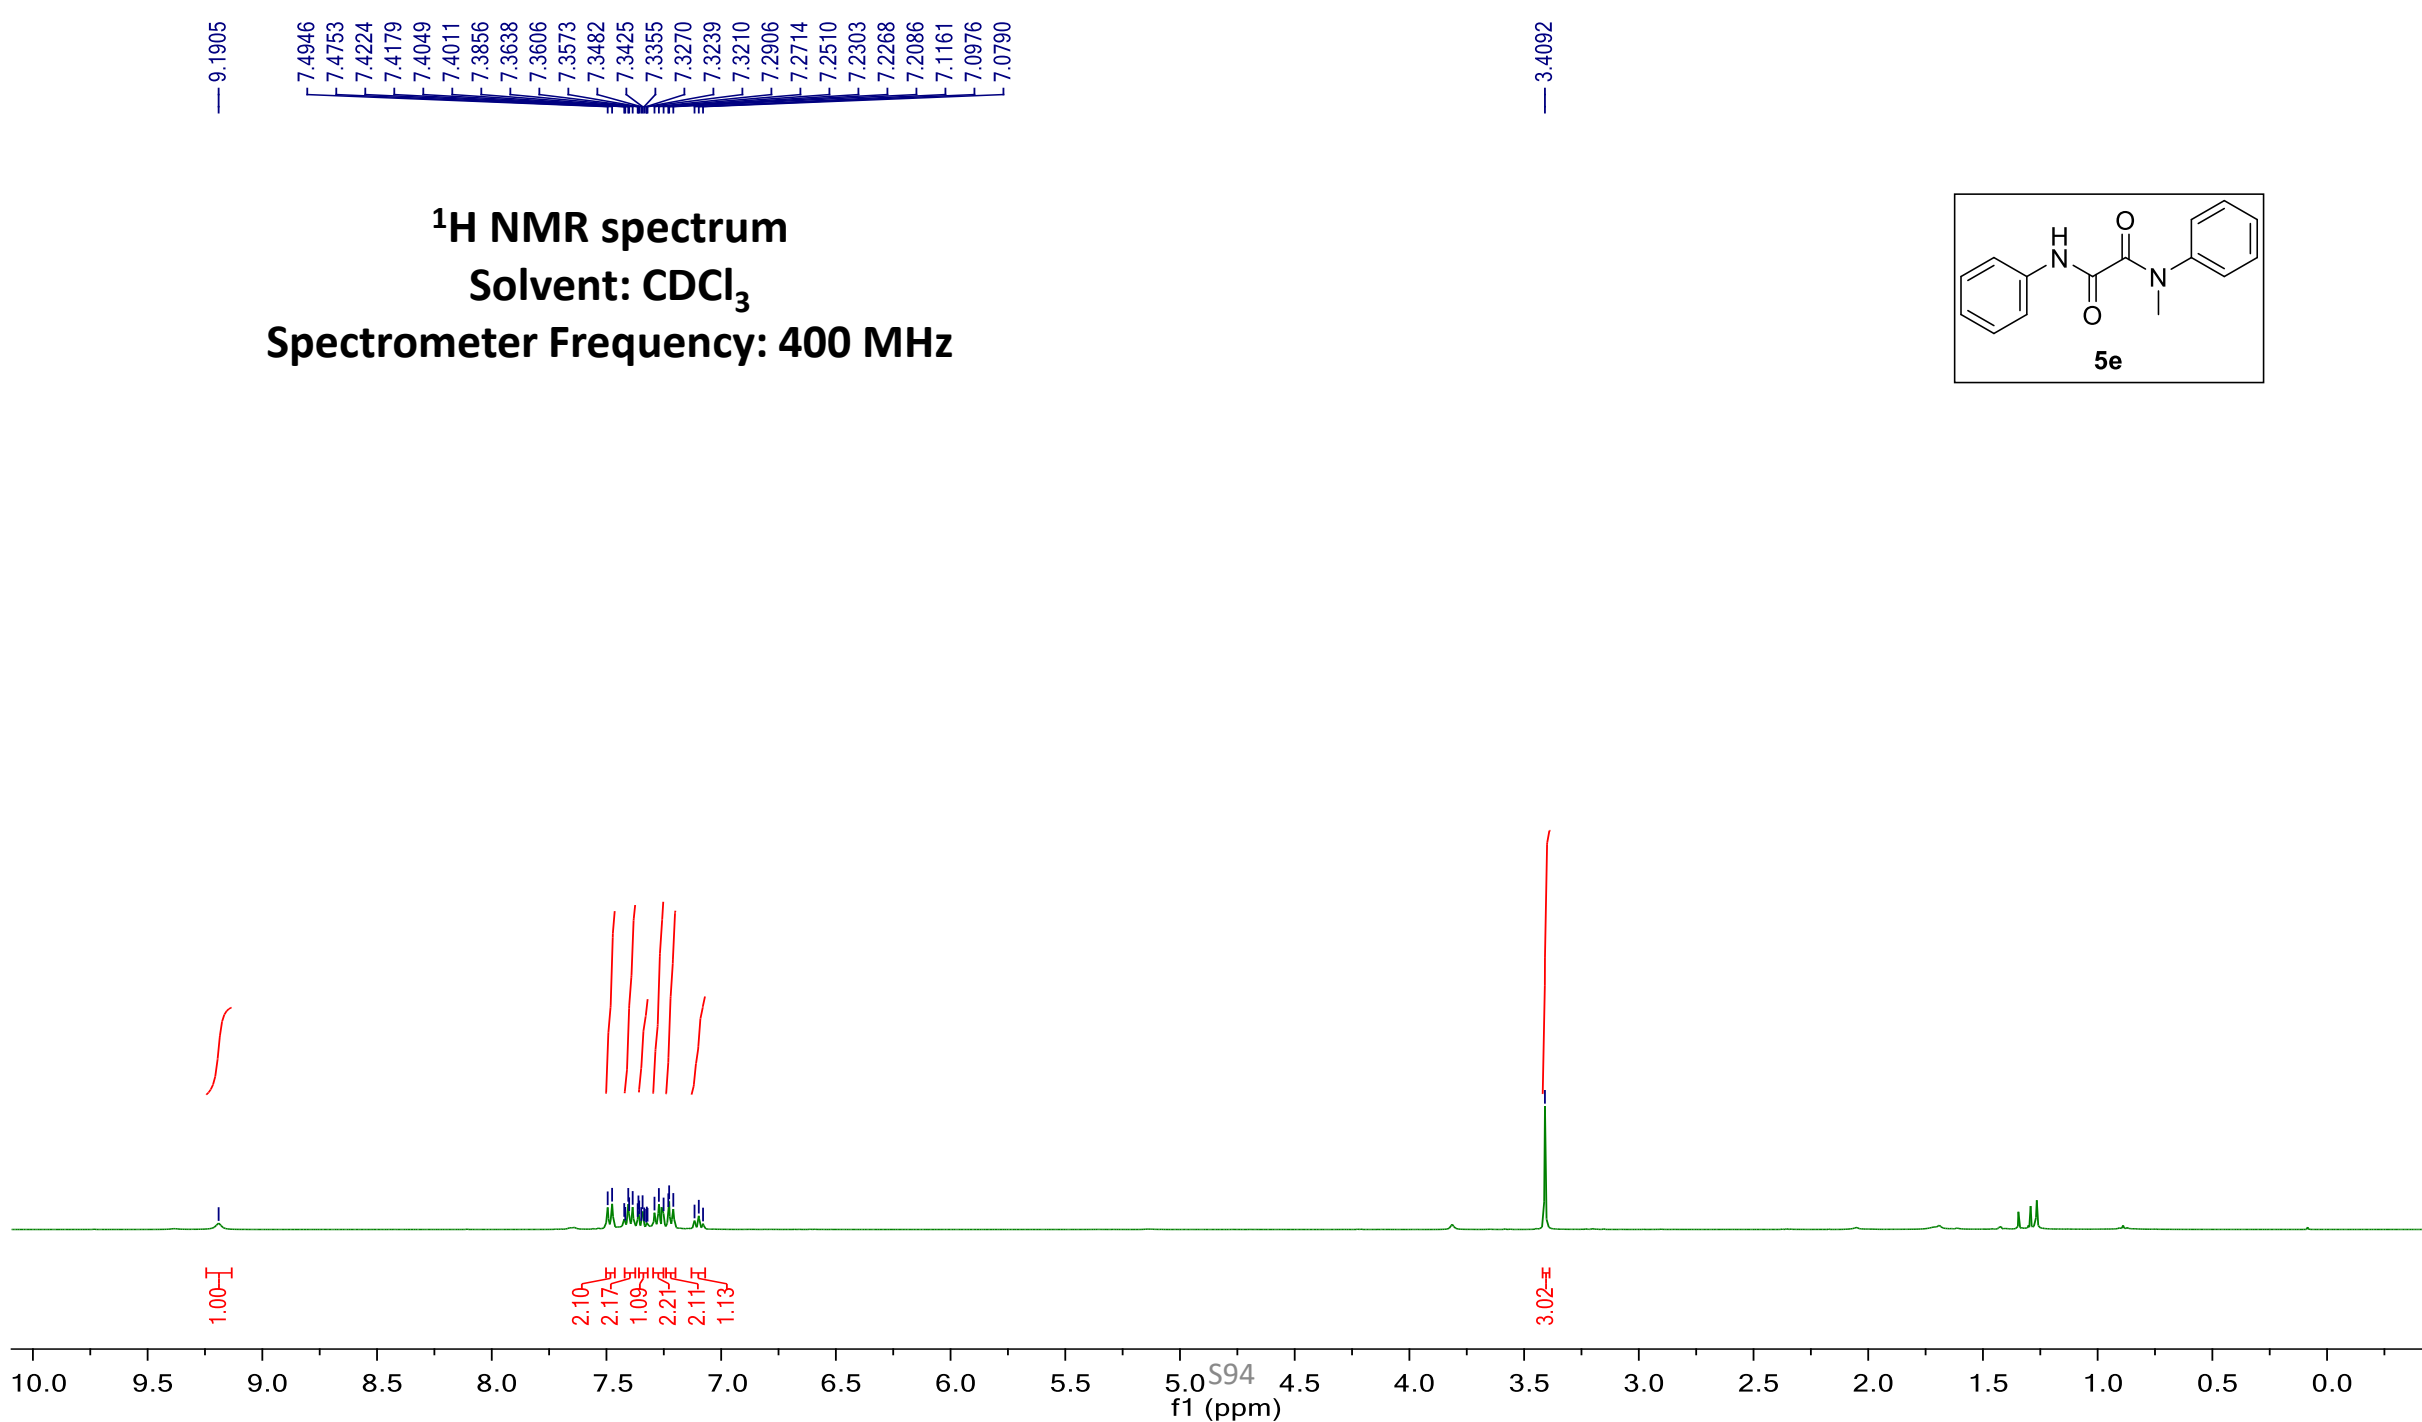

**$^{13}\text{C}$   $\{^1\text{H}\}$  NMR spectrum**  
**Solvent: DMSO- $d_6$**   
**Spectrometer Frequency: 100 MHz**



— 164.2591  
— 161.7309

— 142.0581  
— 137.6534

129.2979  
128.8286  
127.6549  
126.1471  
124.1568  
119.6189

— 35.9062

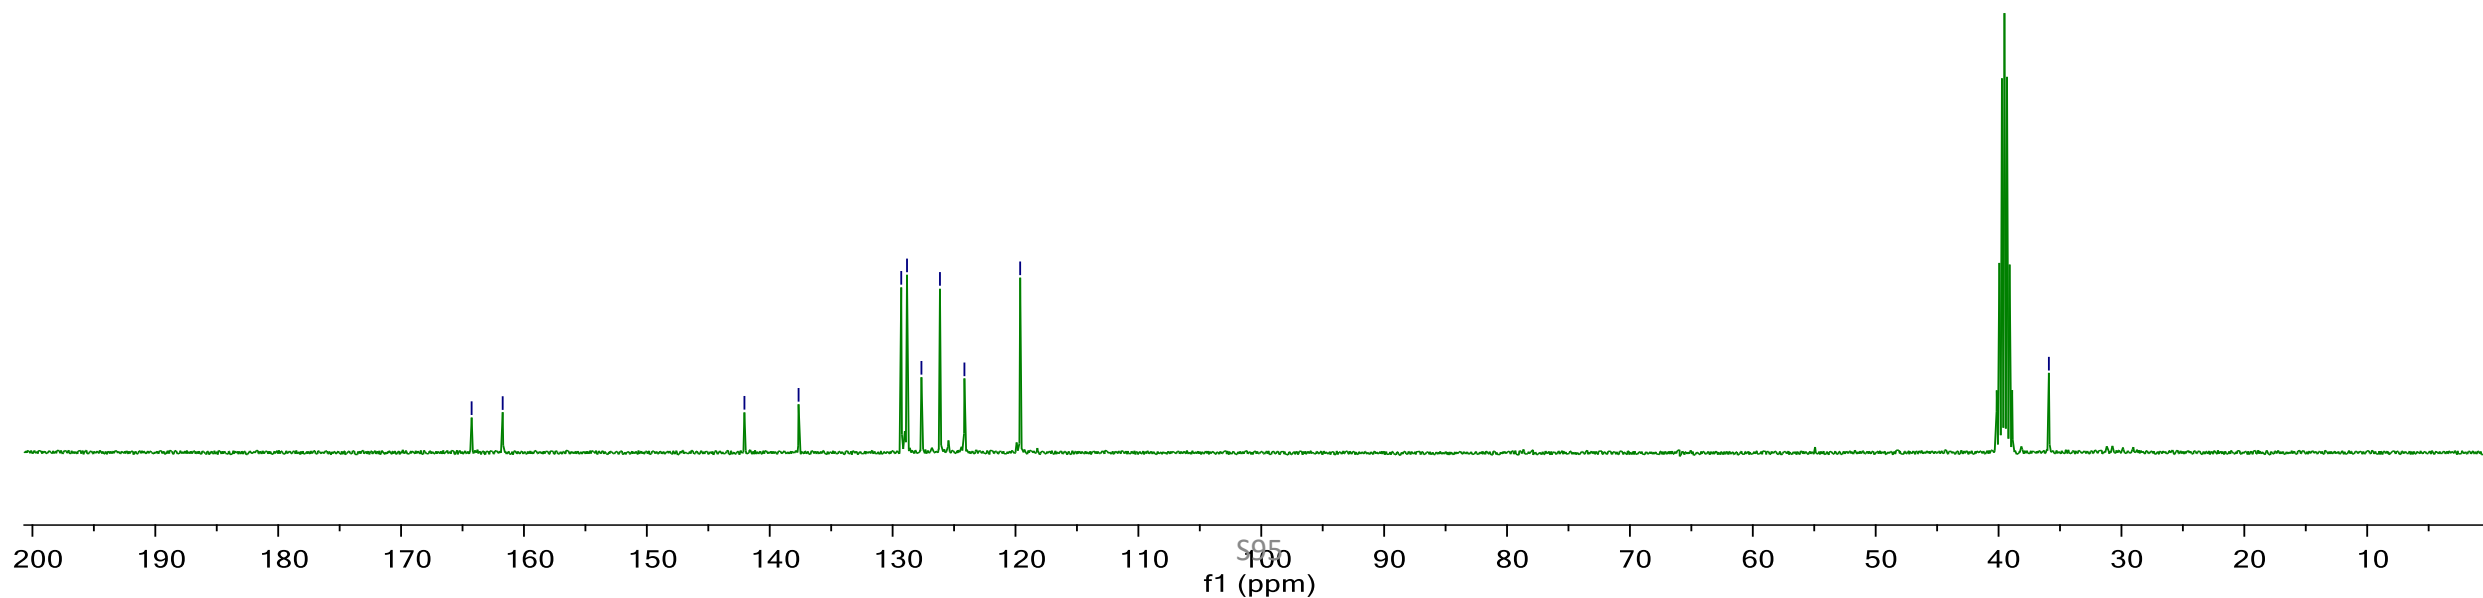

**$^1\text{H}$  NMR spectrum**  
**Solvent:  $\text{DMSO-}d_6$**   
**Spectrometer Frequency: 400 MHz**

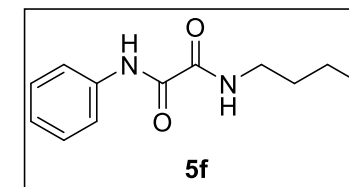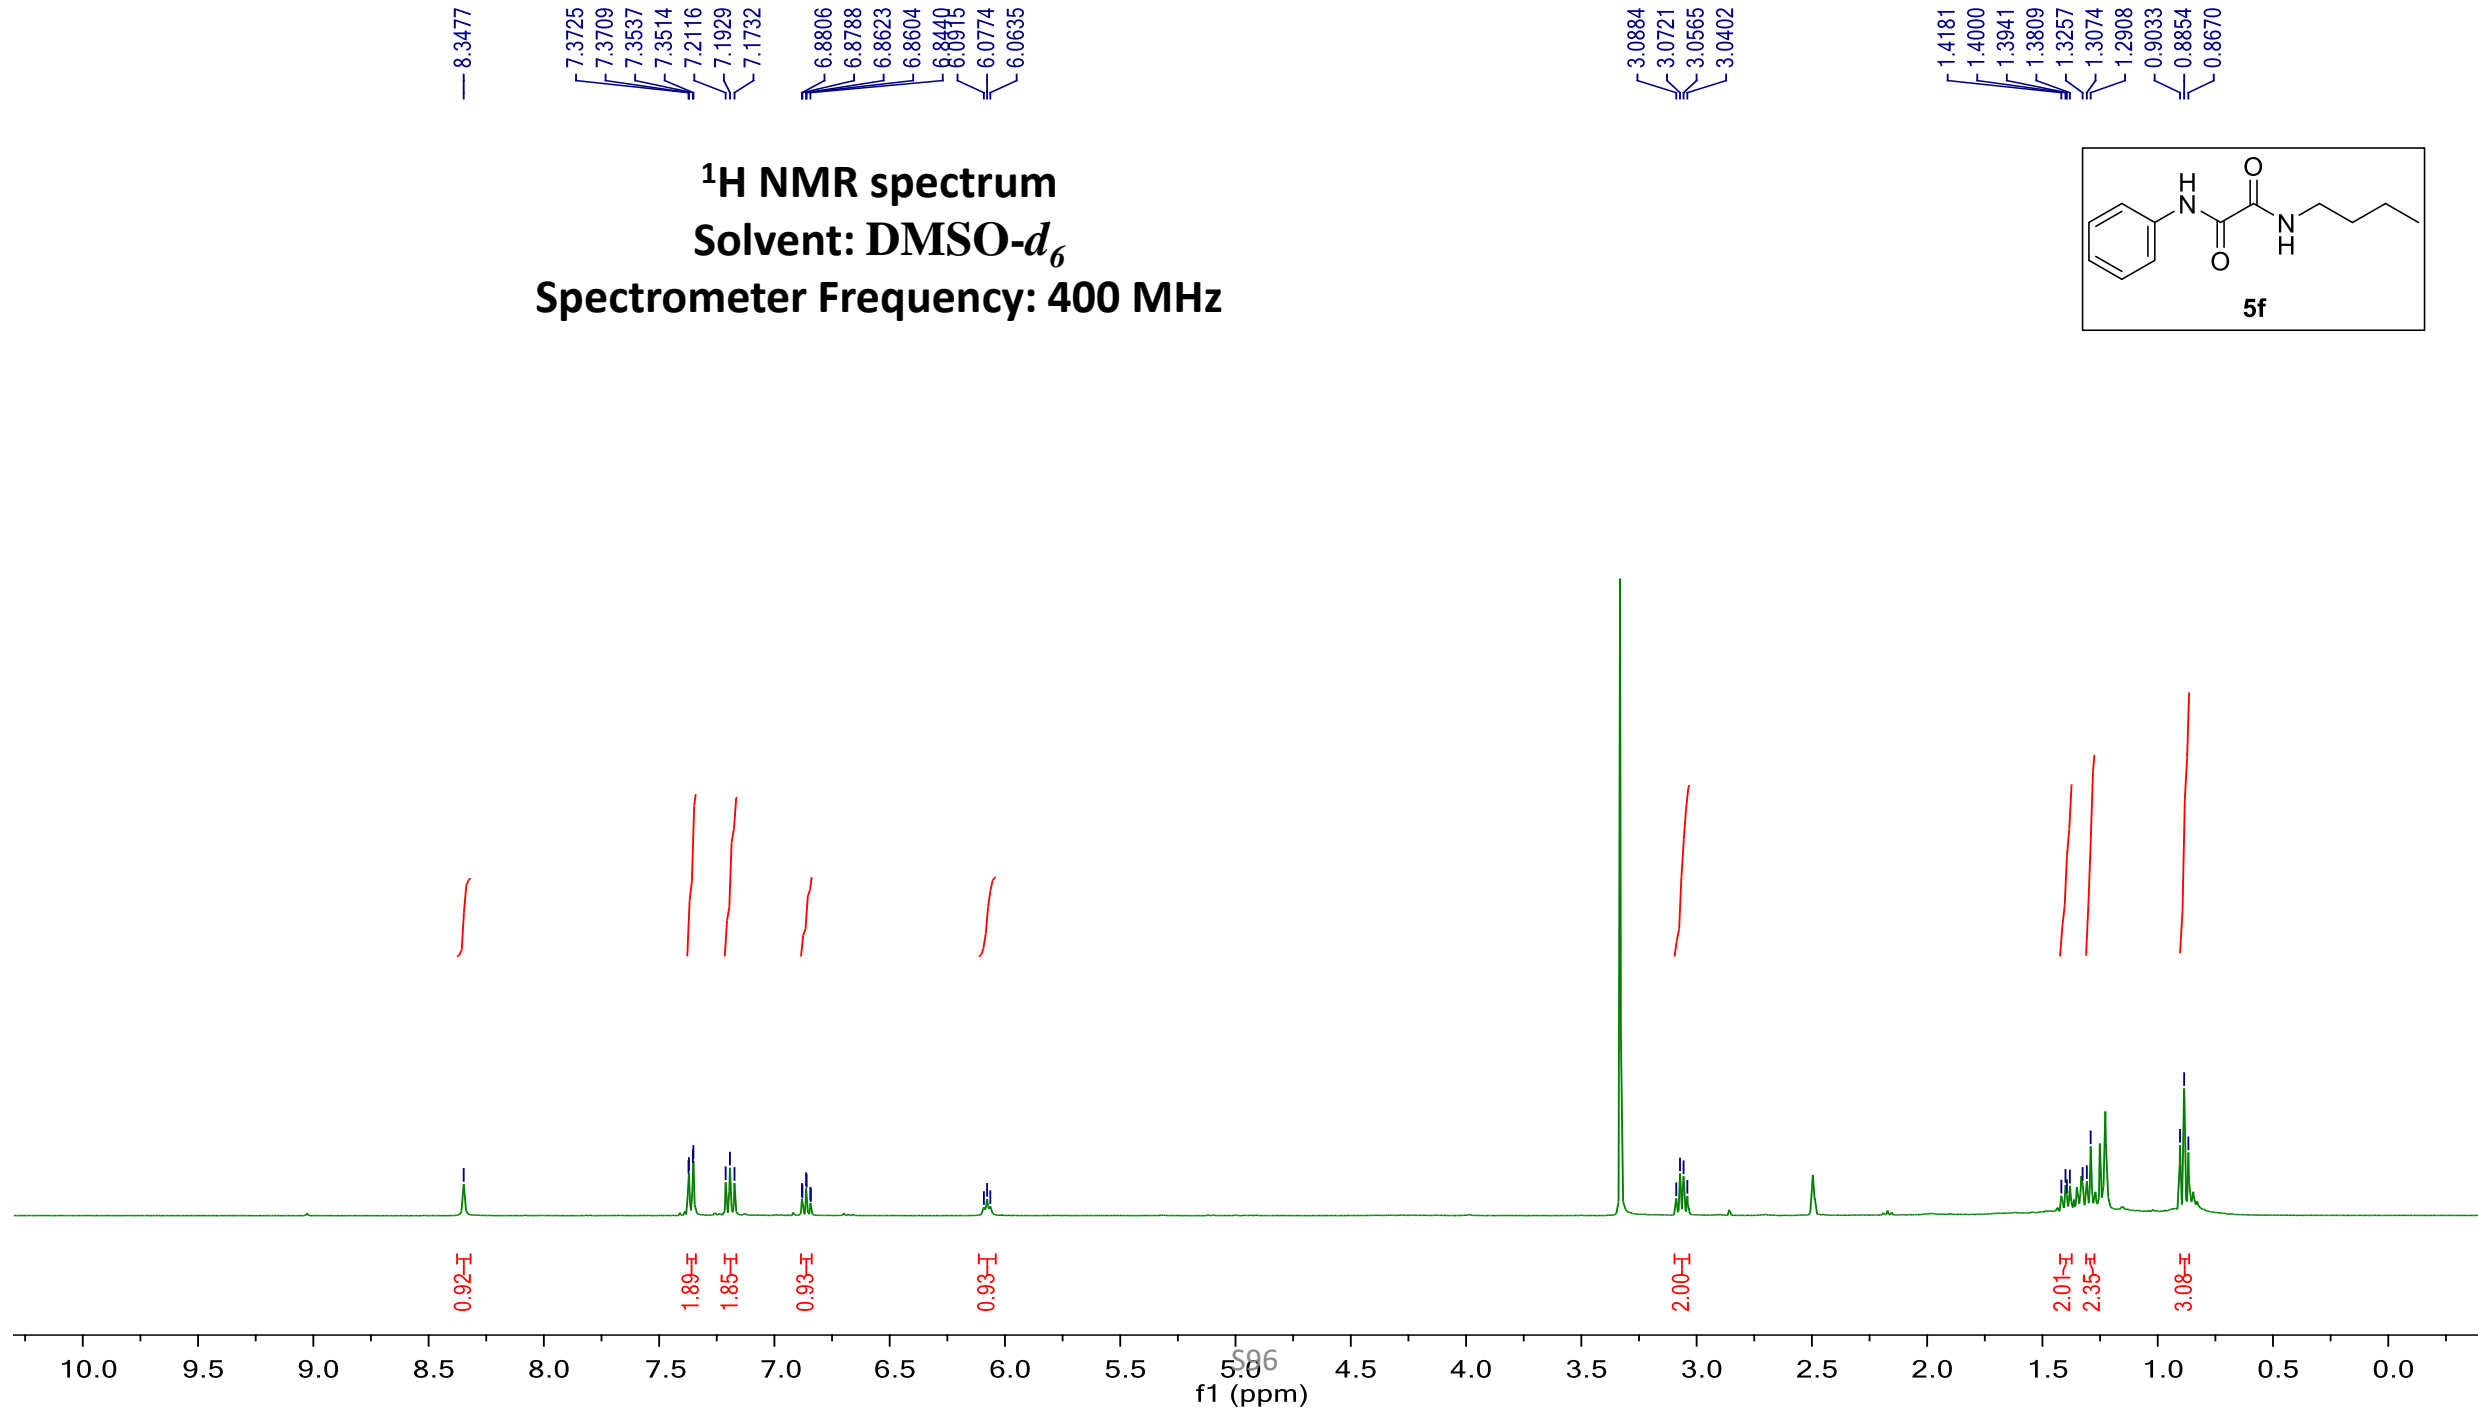

**$^{13}\text{C} \{^1\text{H}\}$  NMR spectrum**  
**Solvent:  $\text{CDCl}_3$**   
**Spectrometer Frequency: 100 MHz**

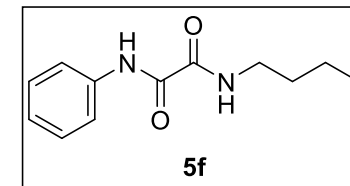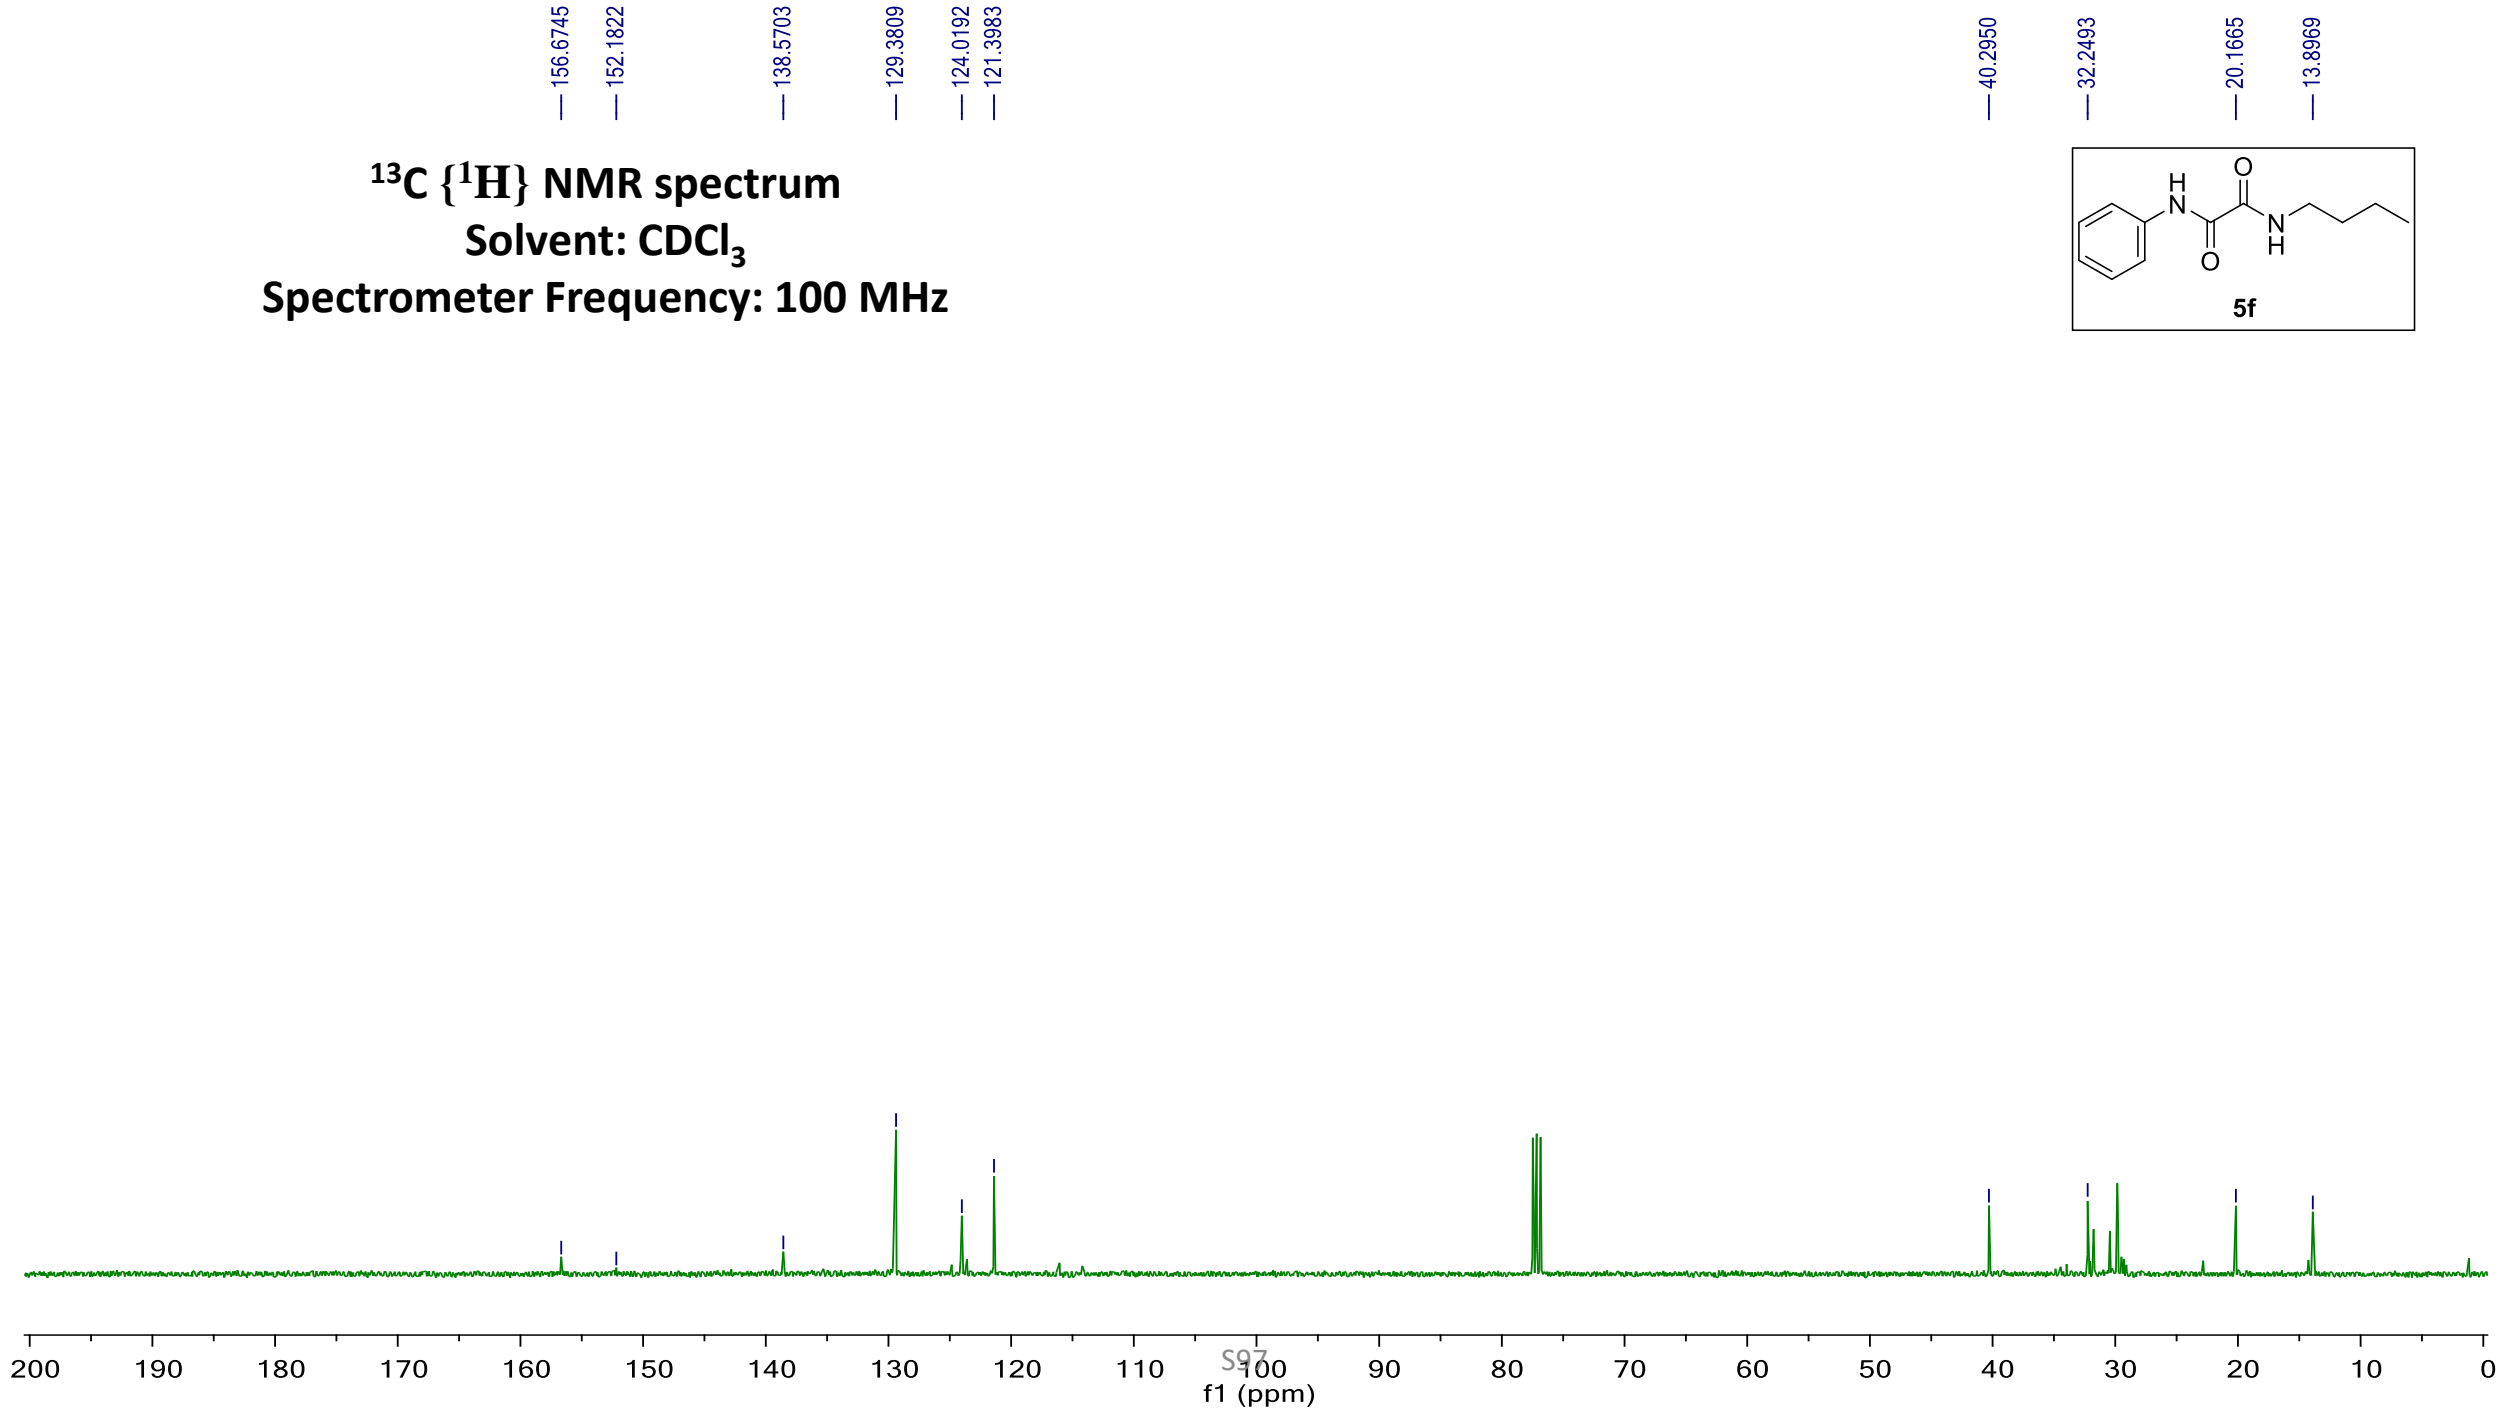

**$^1\text{H}$  NMR spectrum**  
**Solvent:  $\text{DMSO-}d_6$**   
**Spectrometer Frequency: 400 MHz**

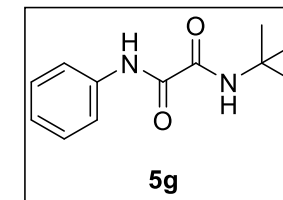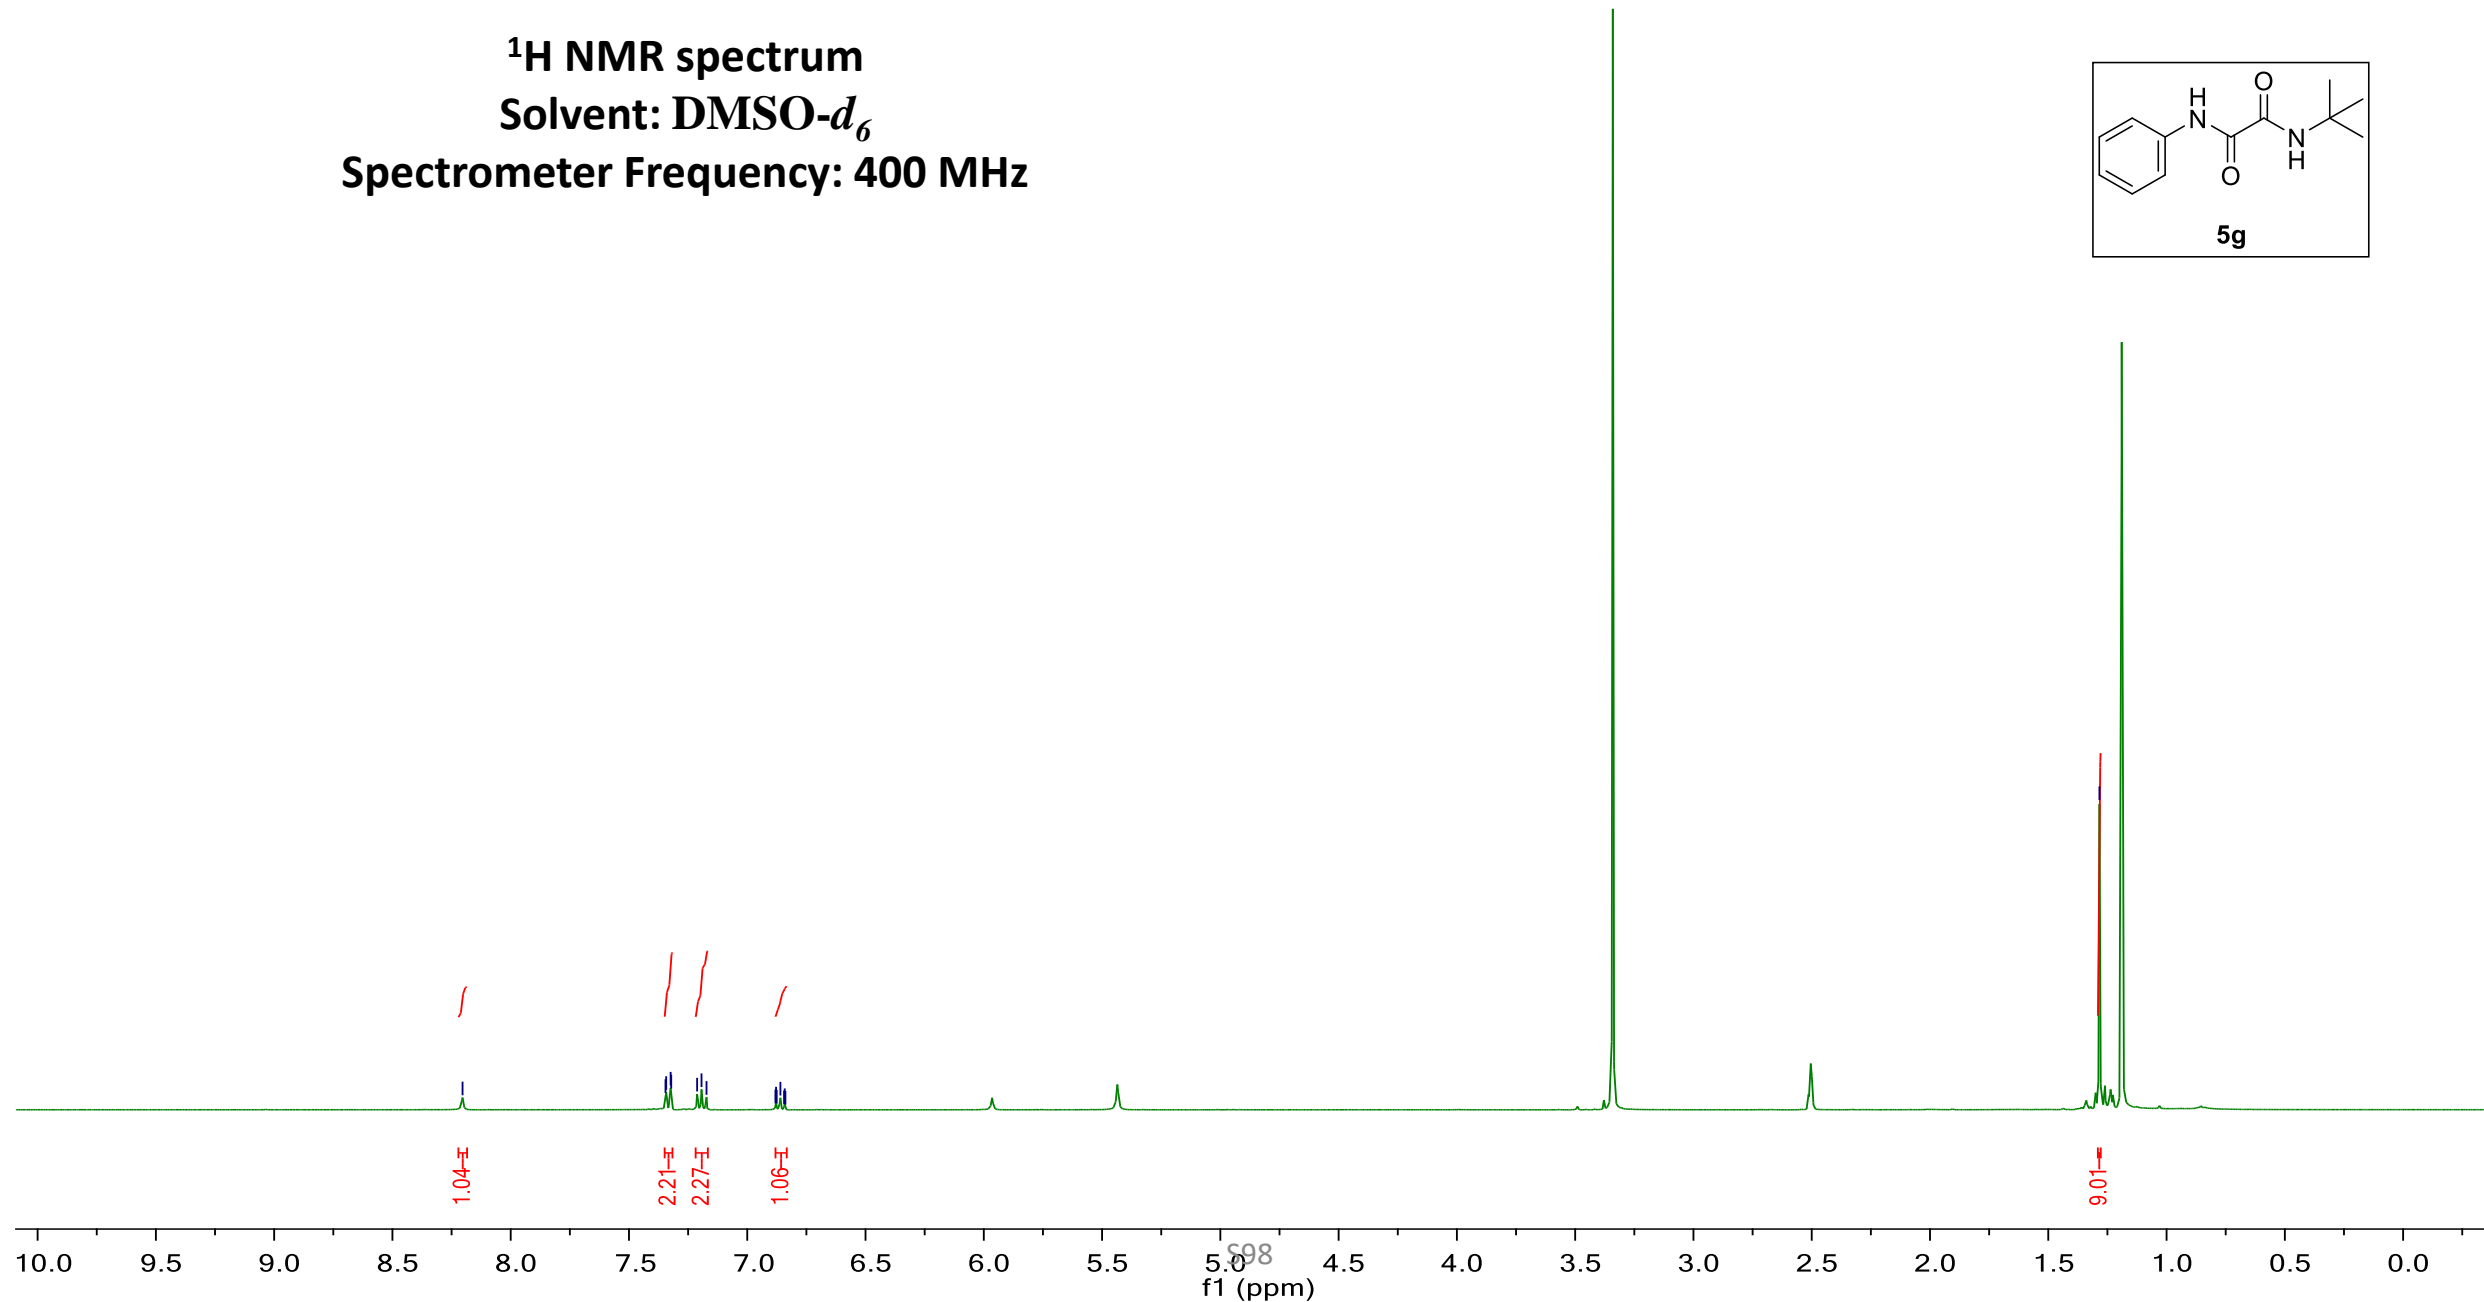

**$^{13}\text{C}$  { $^1\text{H}$ } NMR spectrum**  
**Solvent: DMSO- $d_6$**   
**Spectrometer Frequency: 100 MHz**

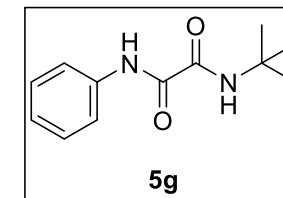

157.1043  
155.8224  
139.9477  
129.6238  
123.4082  
120.6823

51.4089

30.0285

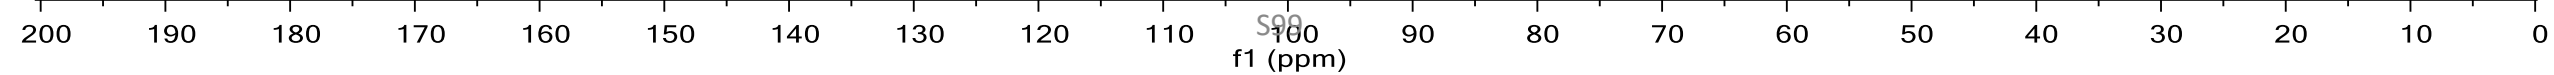

**$^1\text{H}$  NMR spectrum**  
**Solvent:  $\text{CDCl}_3$**   
**Spectrometer Frequency: 400 MHz**

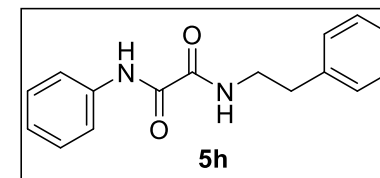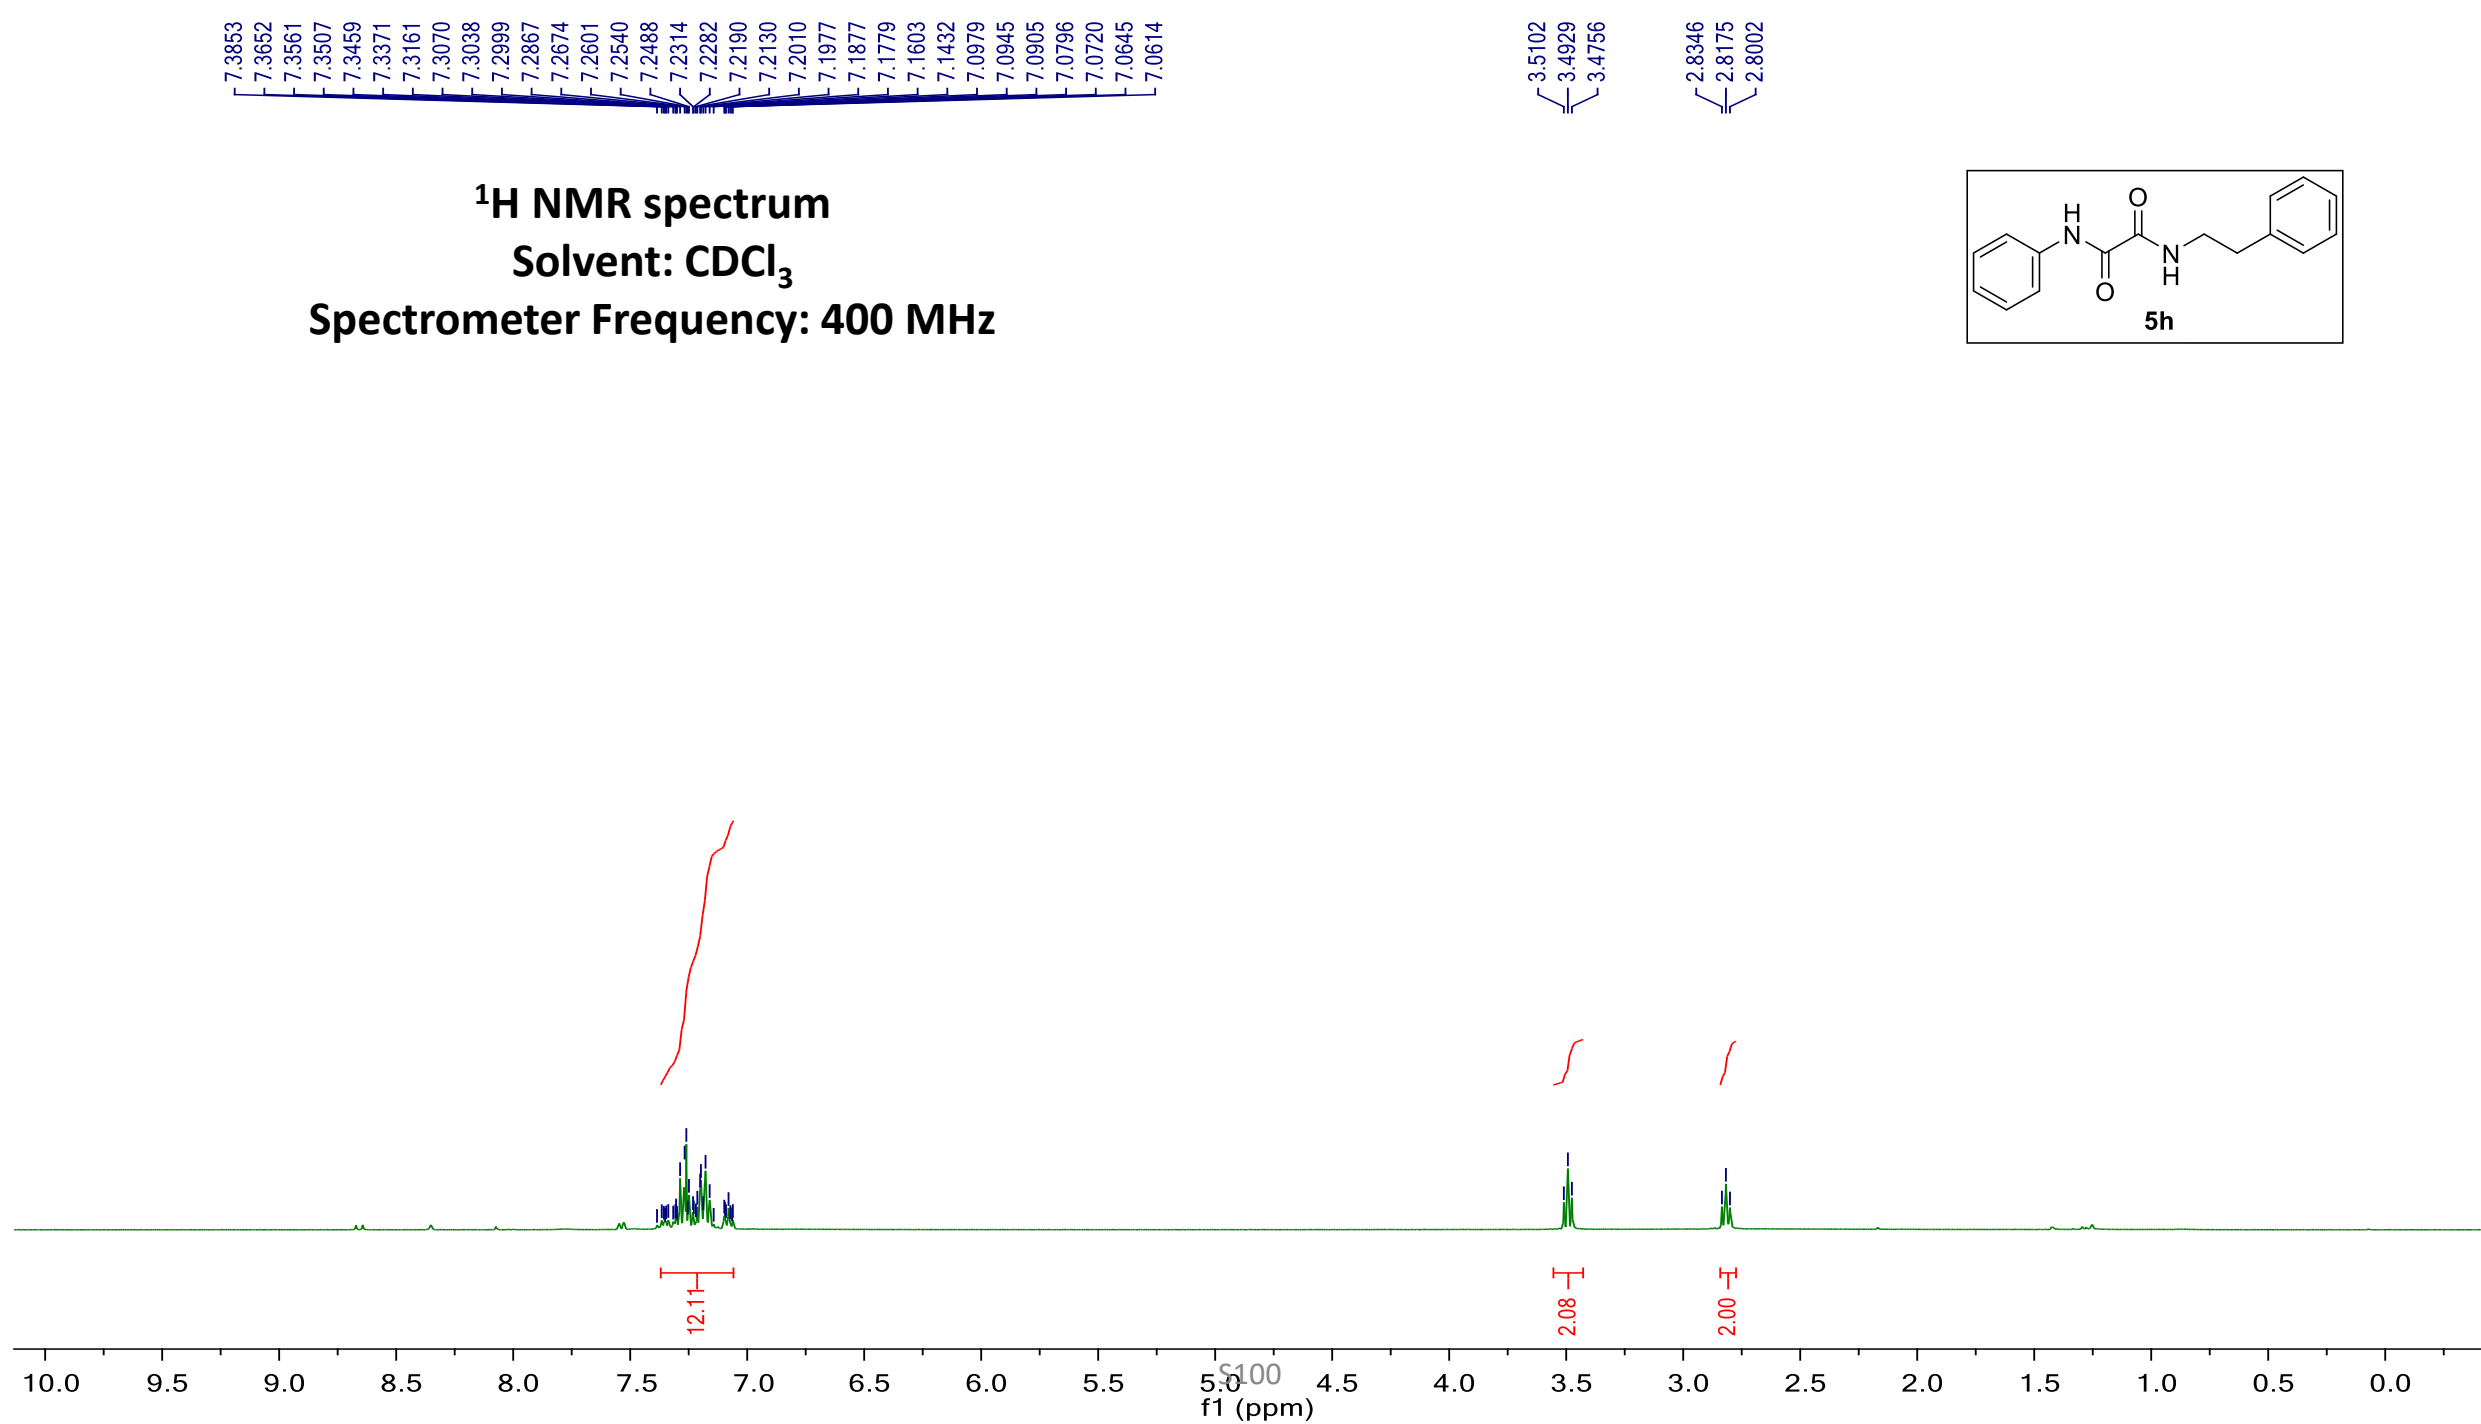

**$^{13}\text{C}$  { $^1\text{H}$ } NMR spectrum**  
**Solvent:  $\text{CDCl}_3$**   
**Spectrometer Frequency: 100 MHz**

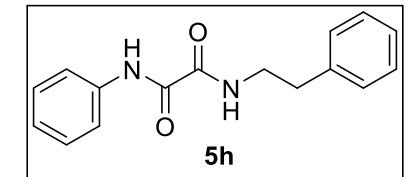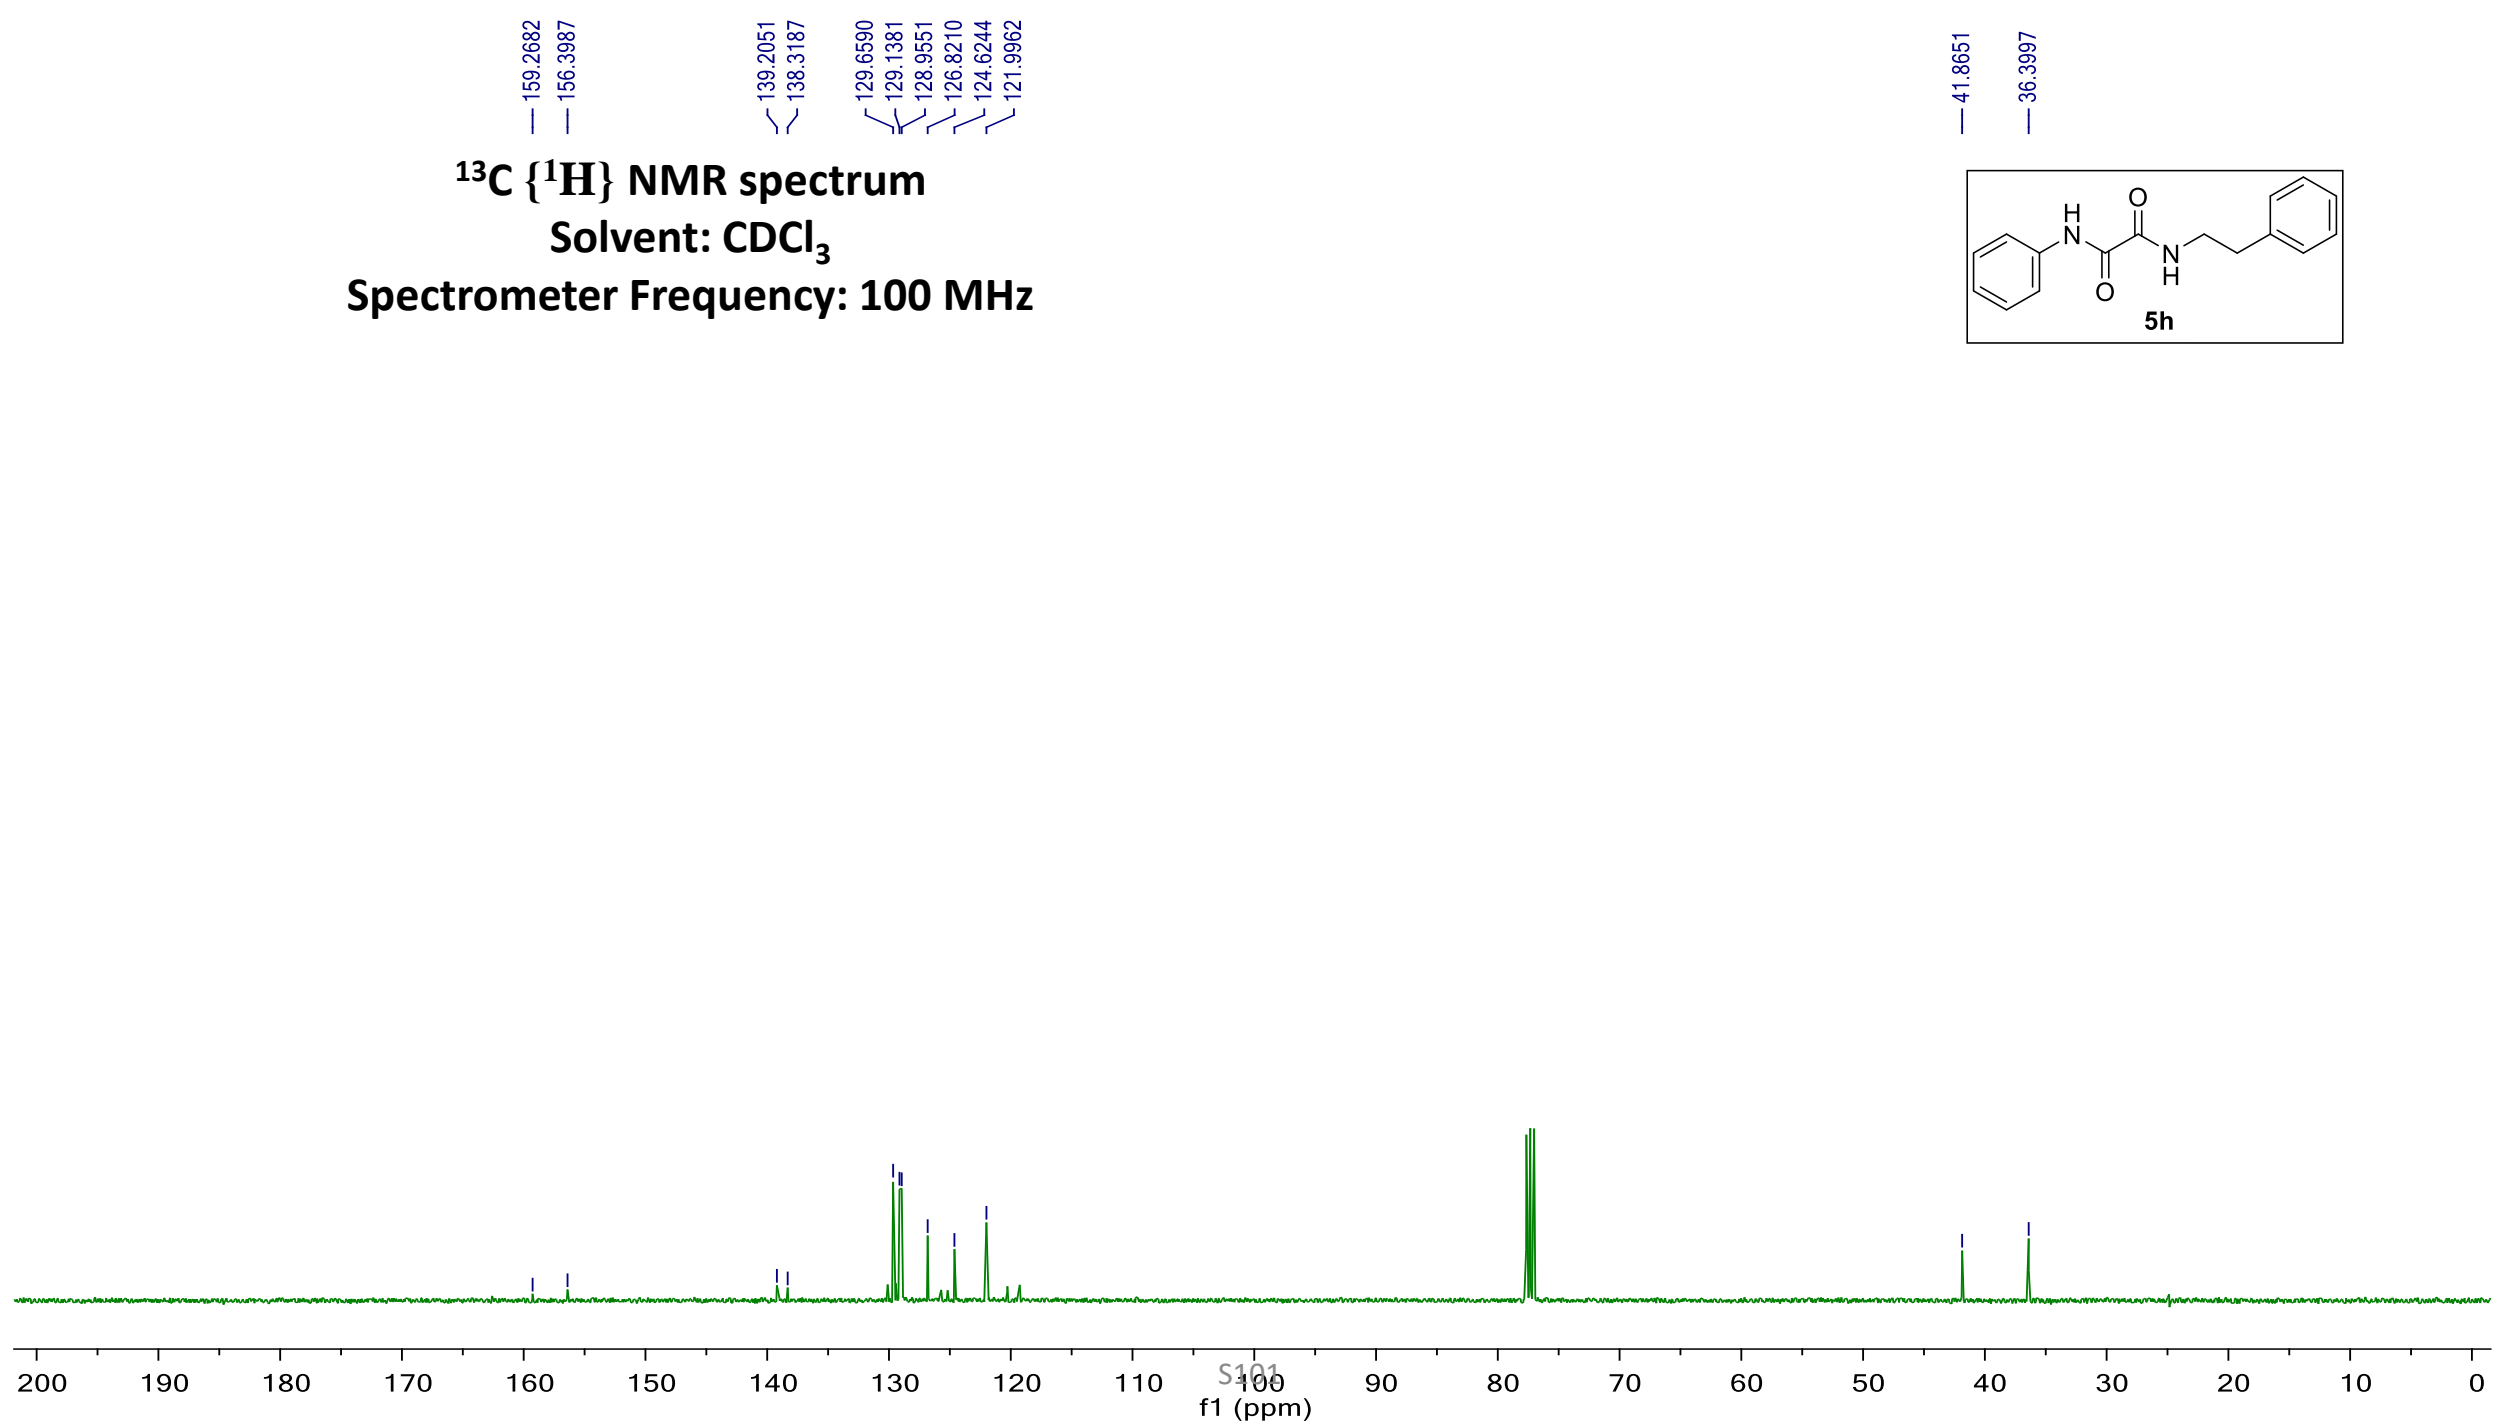

**$^1\text{H}$  NMR spectrum**  
**Solvent:  $\text{CDCl}_3$**   
**Spectrometer Frequency: 400 MHz**

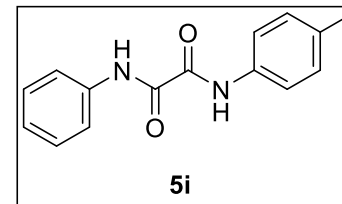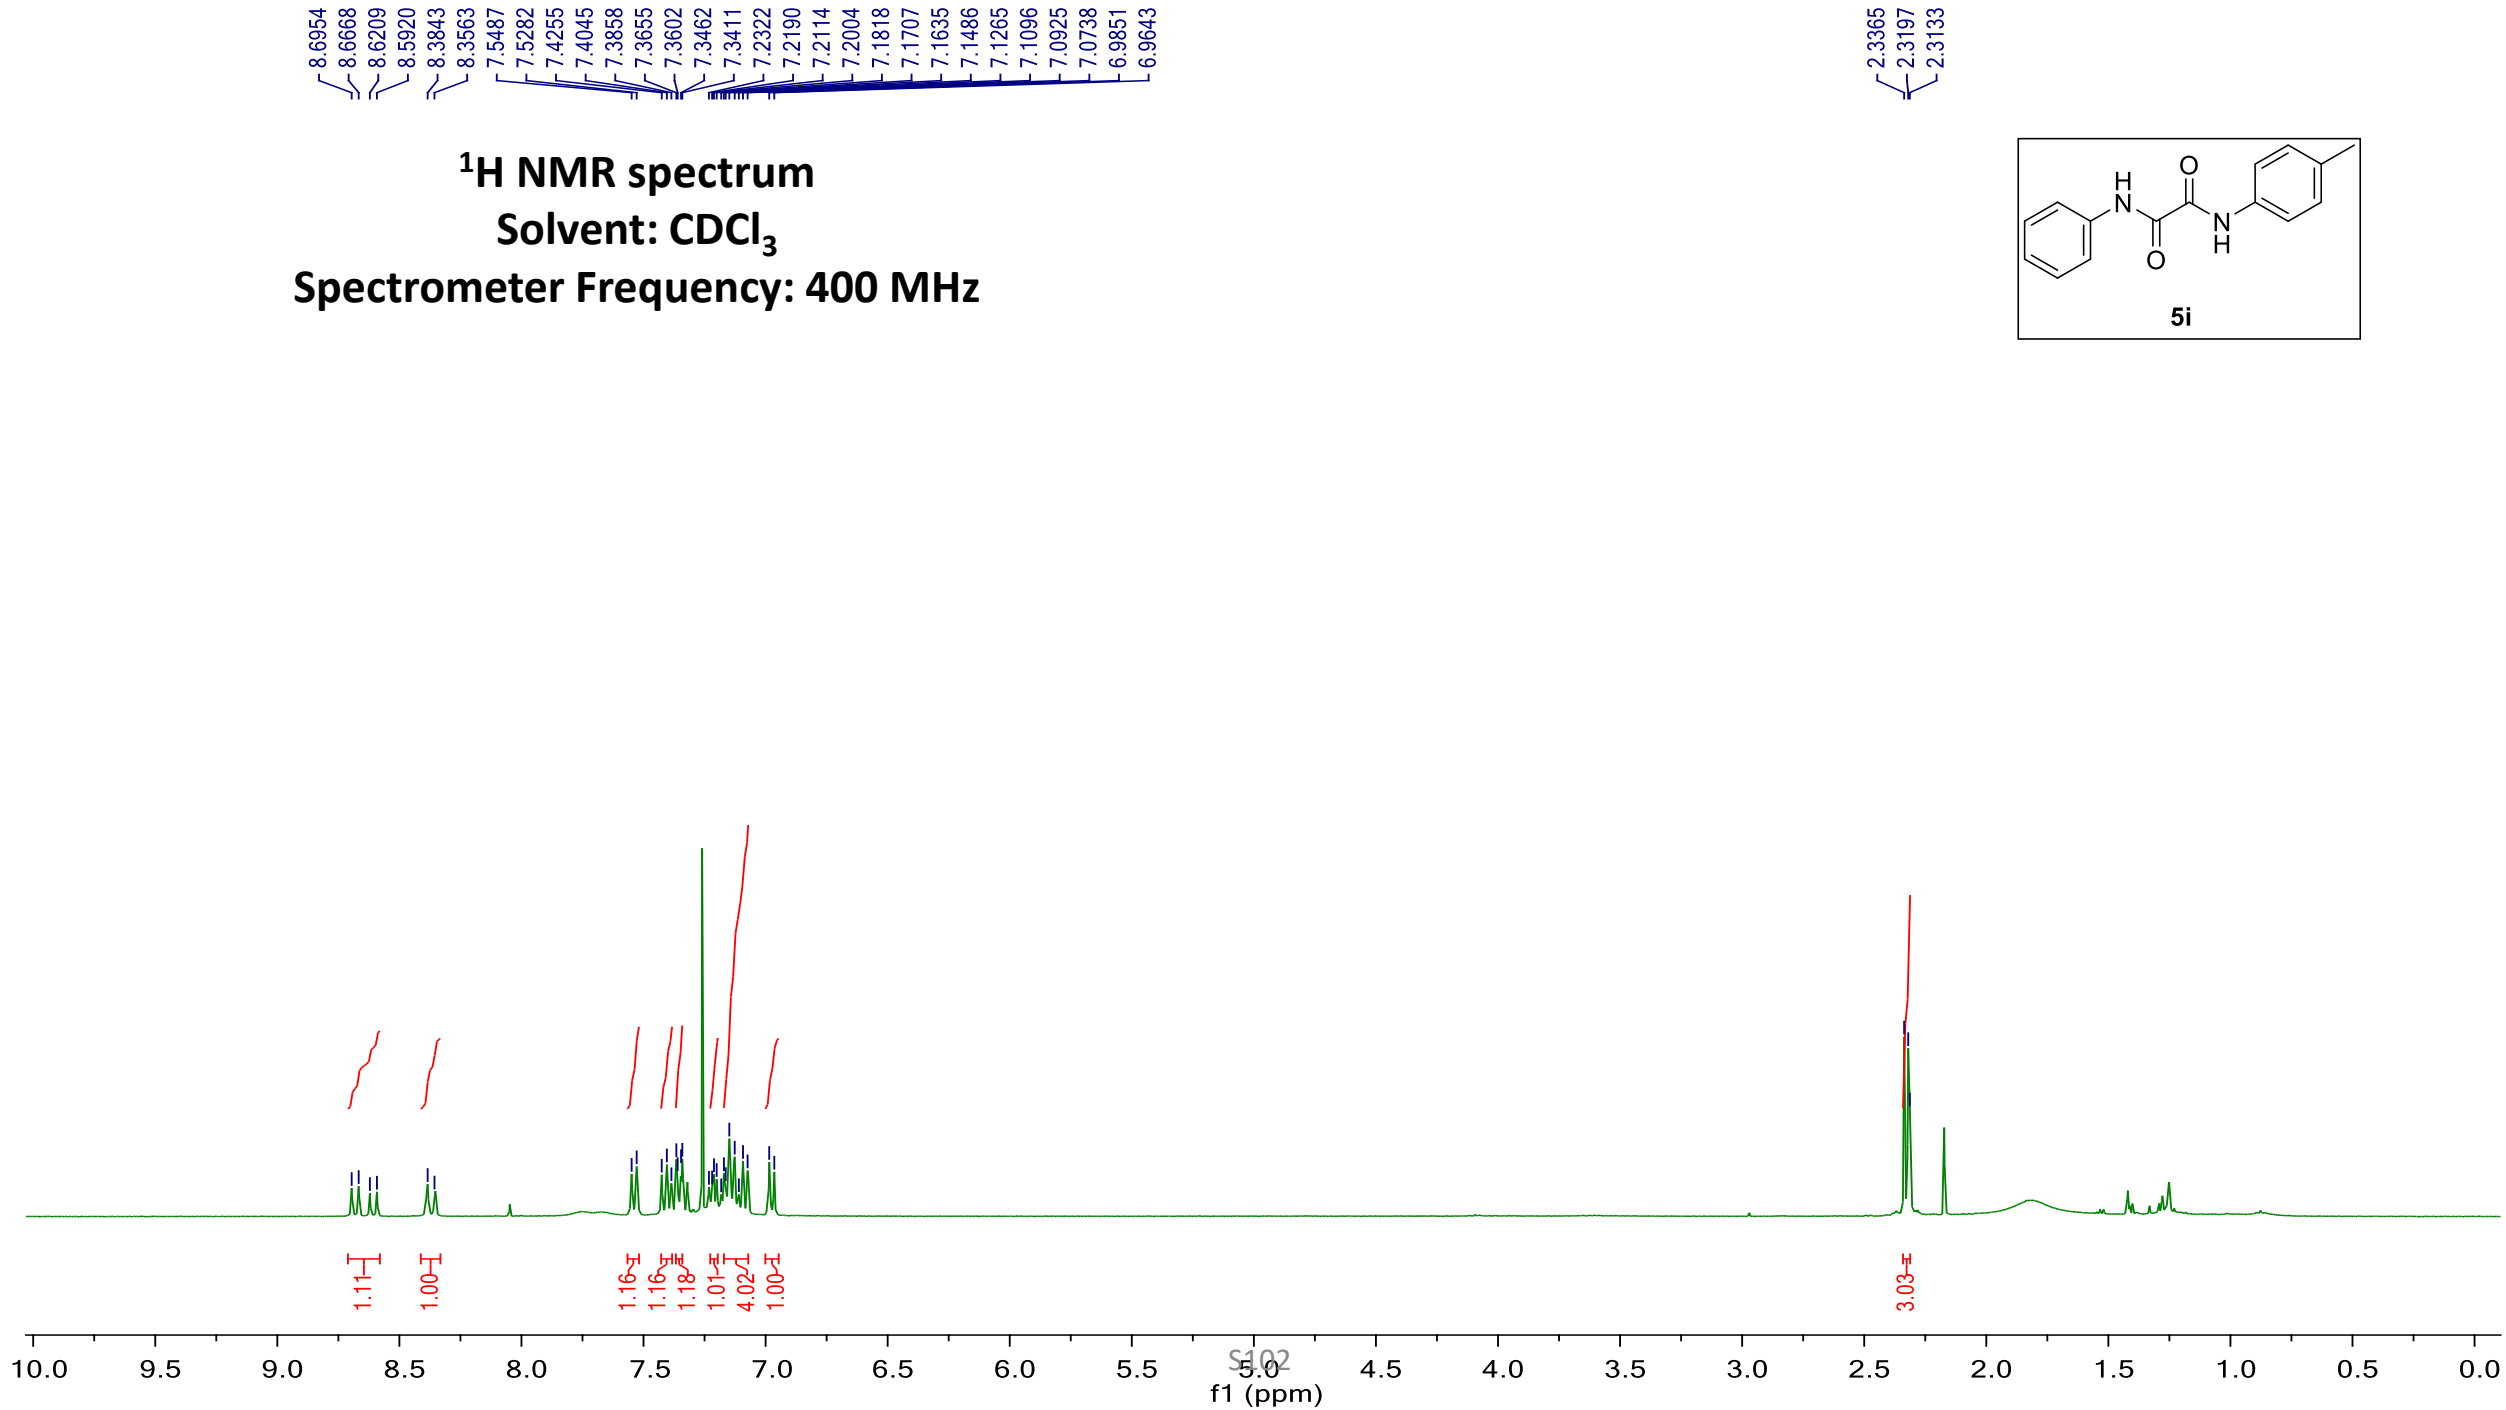

# $^{13}\text{C} \{^1\text{H}\}$ NMR spectrum

Solvent:  $\text{CDCl}_3$

Spectrometer Frequency: 100 MHz

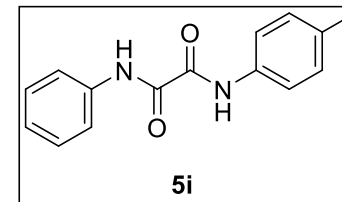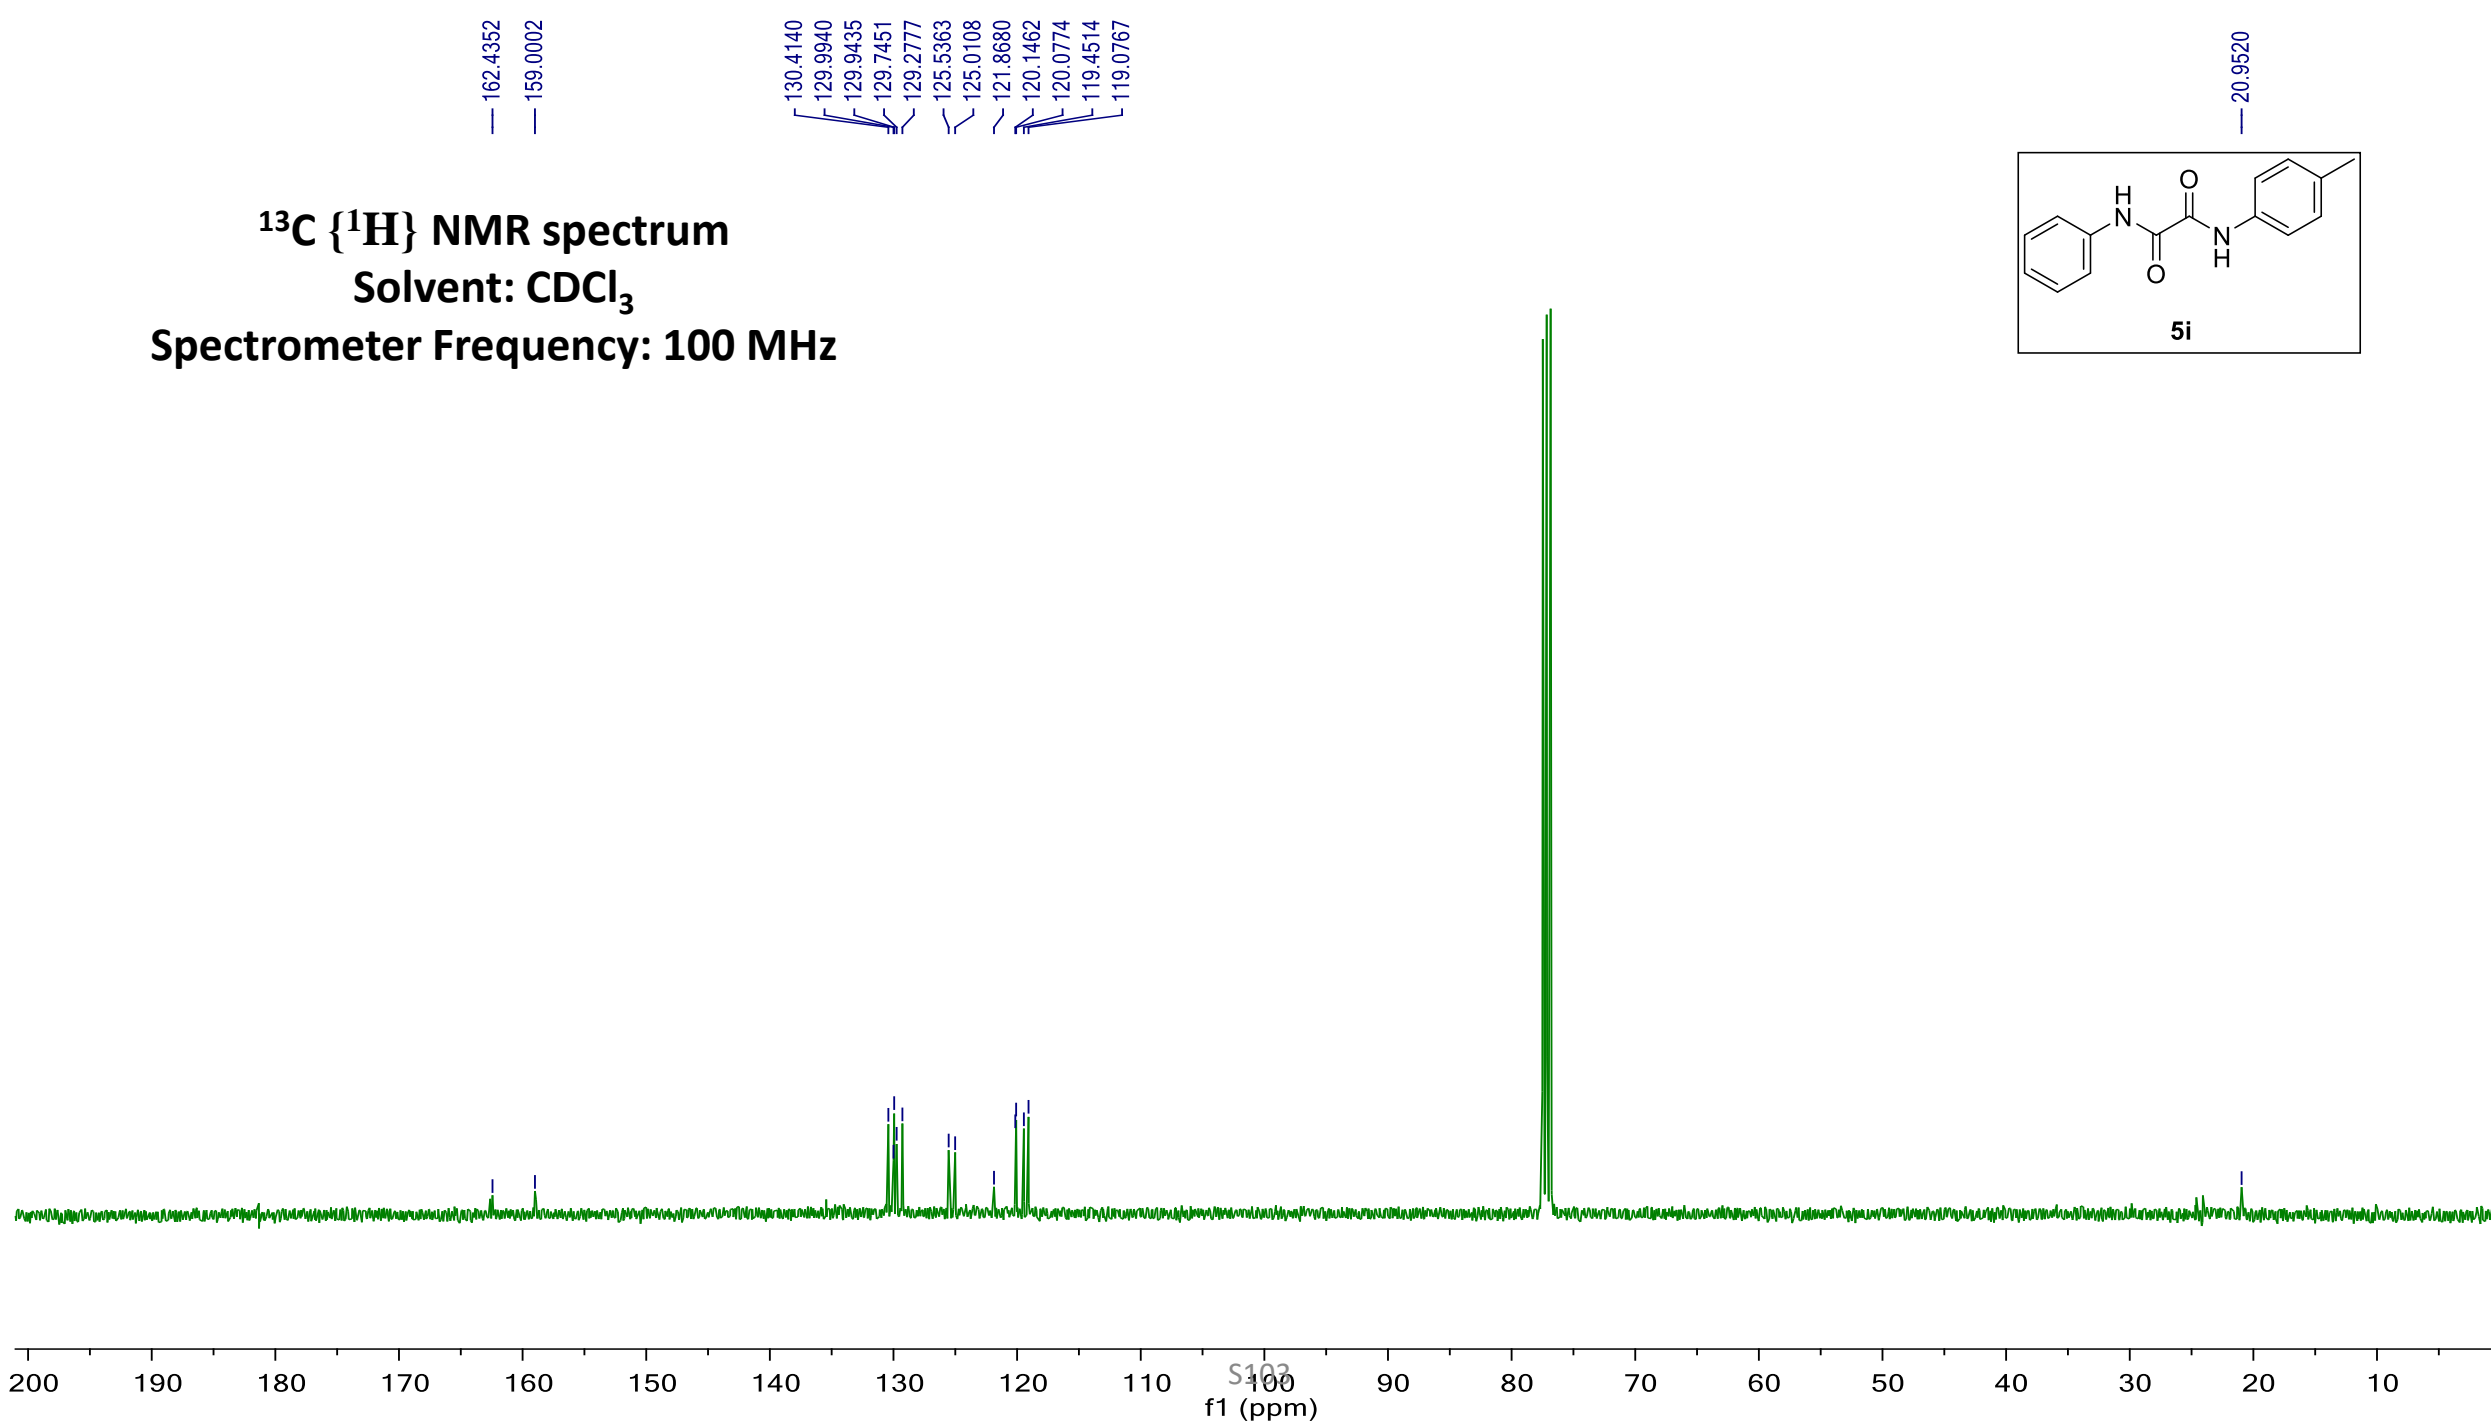

**$^1\text{H}$  NMR spectrum**  
**Solvent:  $\text{DMSO-}d_6$**   
**Spectrometer Frequency: 400 MHz**

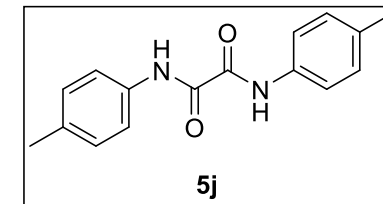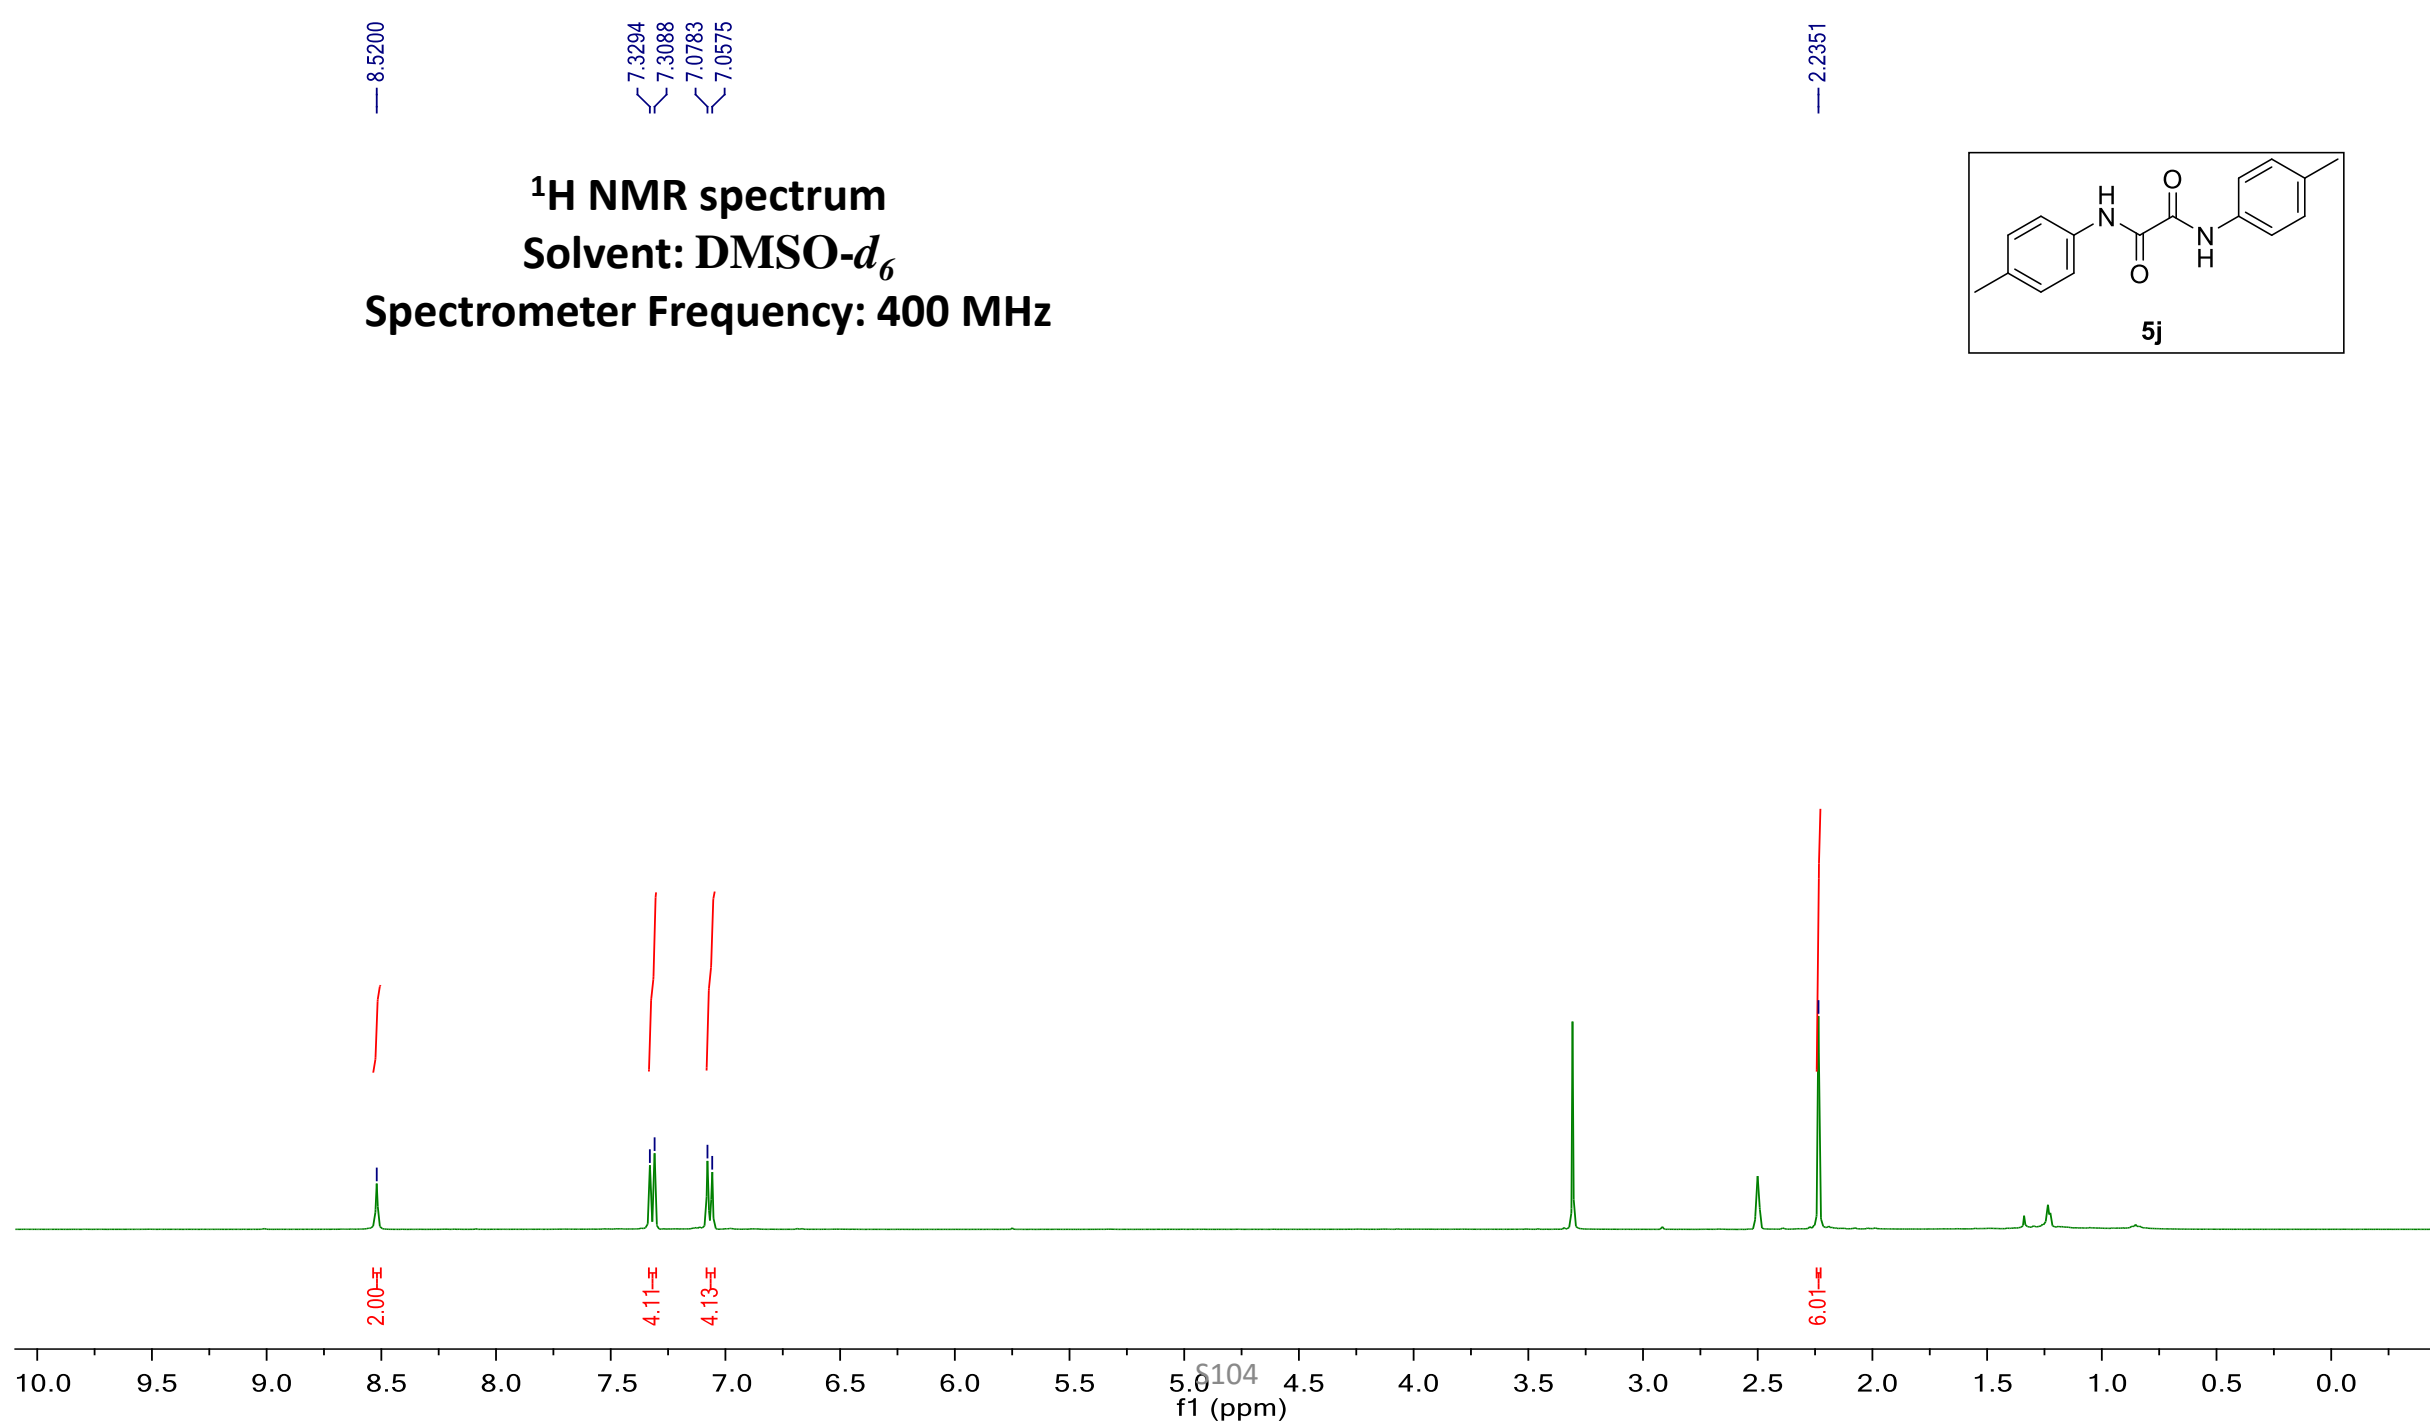

**$^{13}\text{C}$  { $^1\text{H}$ } NMR spectrum**  
**Solvent: DMSO- $d_6$**   
**Spectrometer Frequency: 100 MHz**

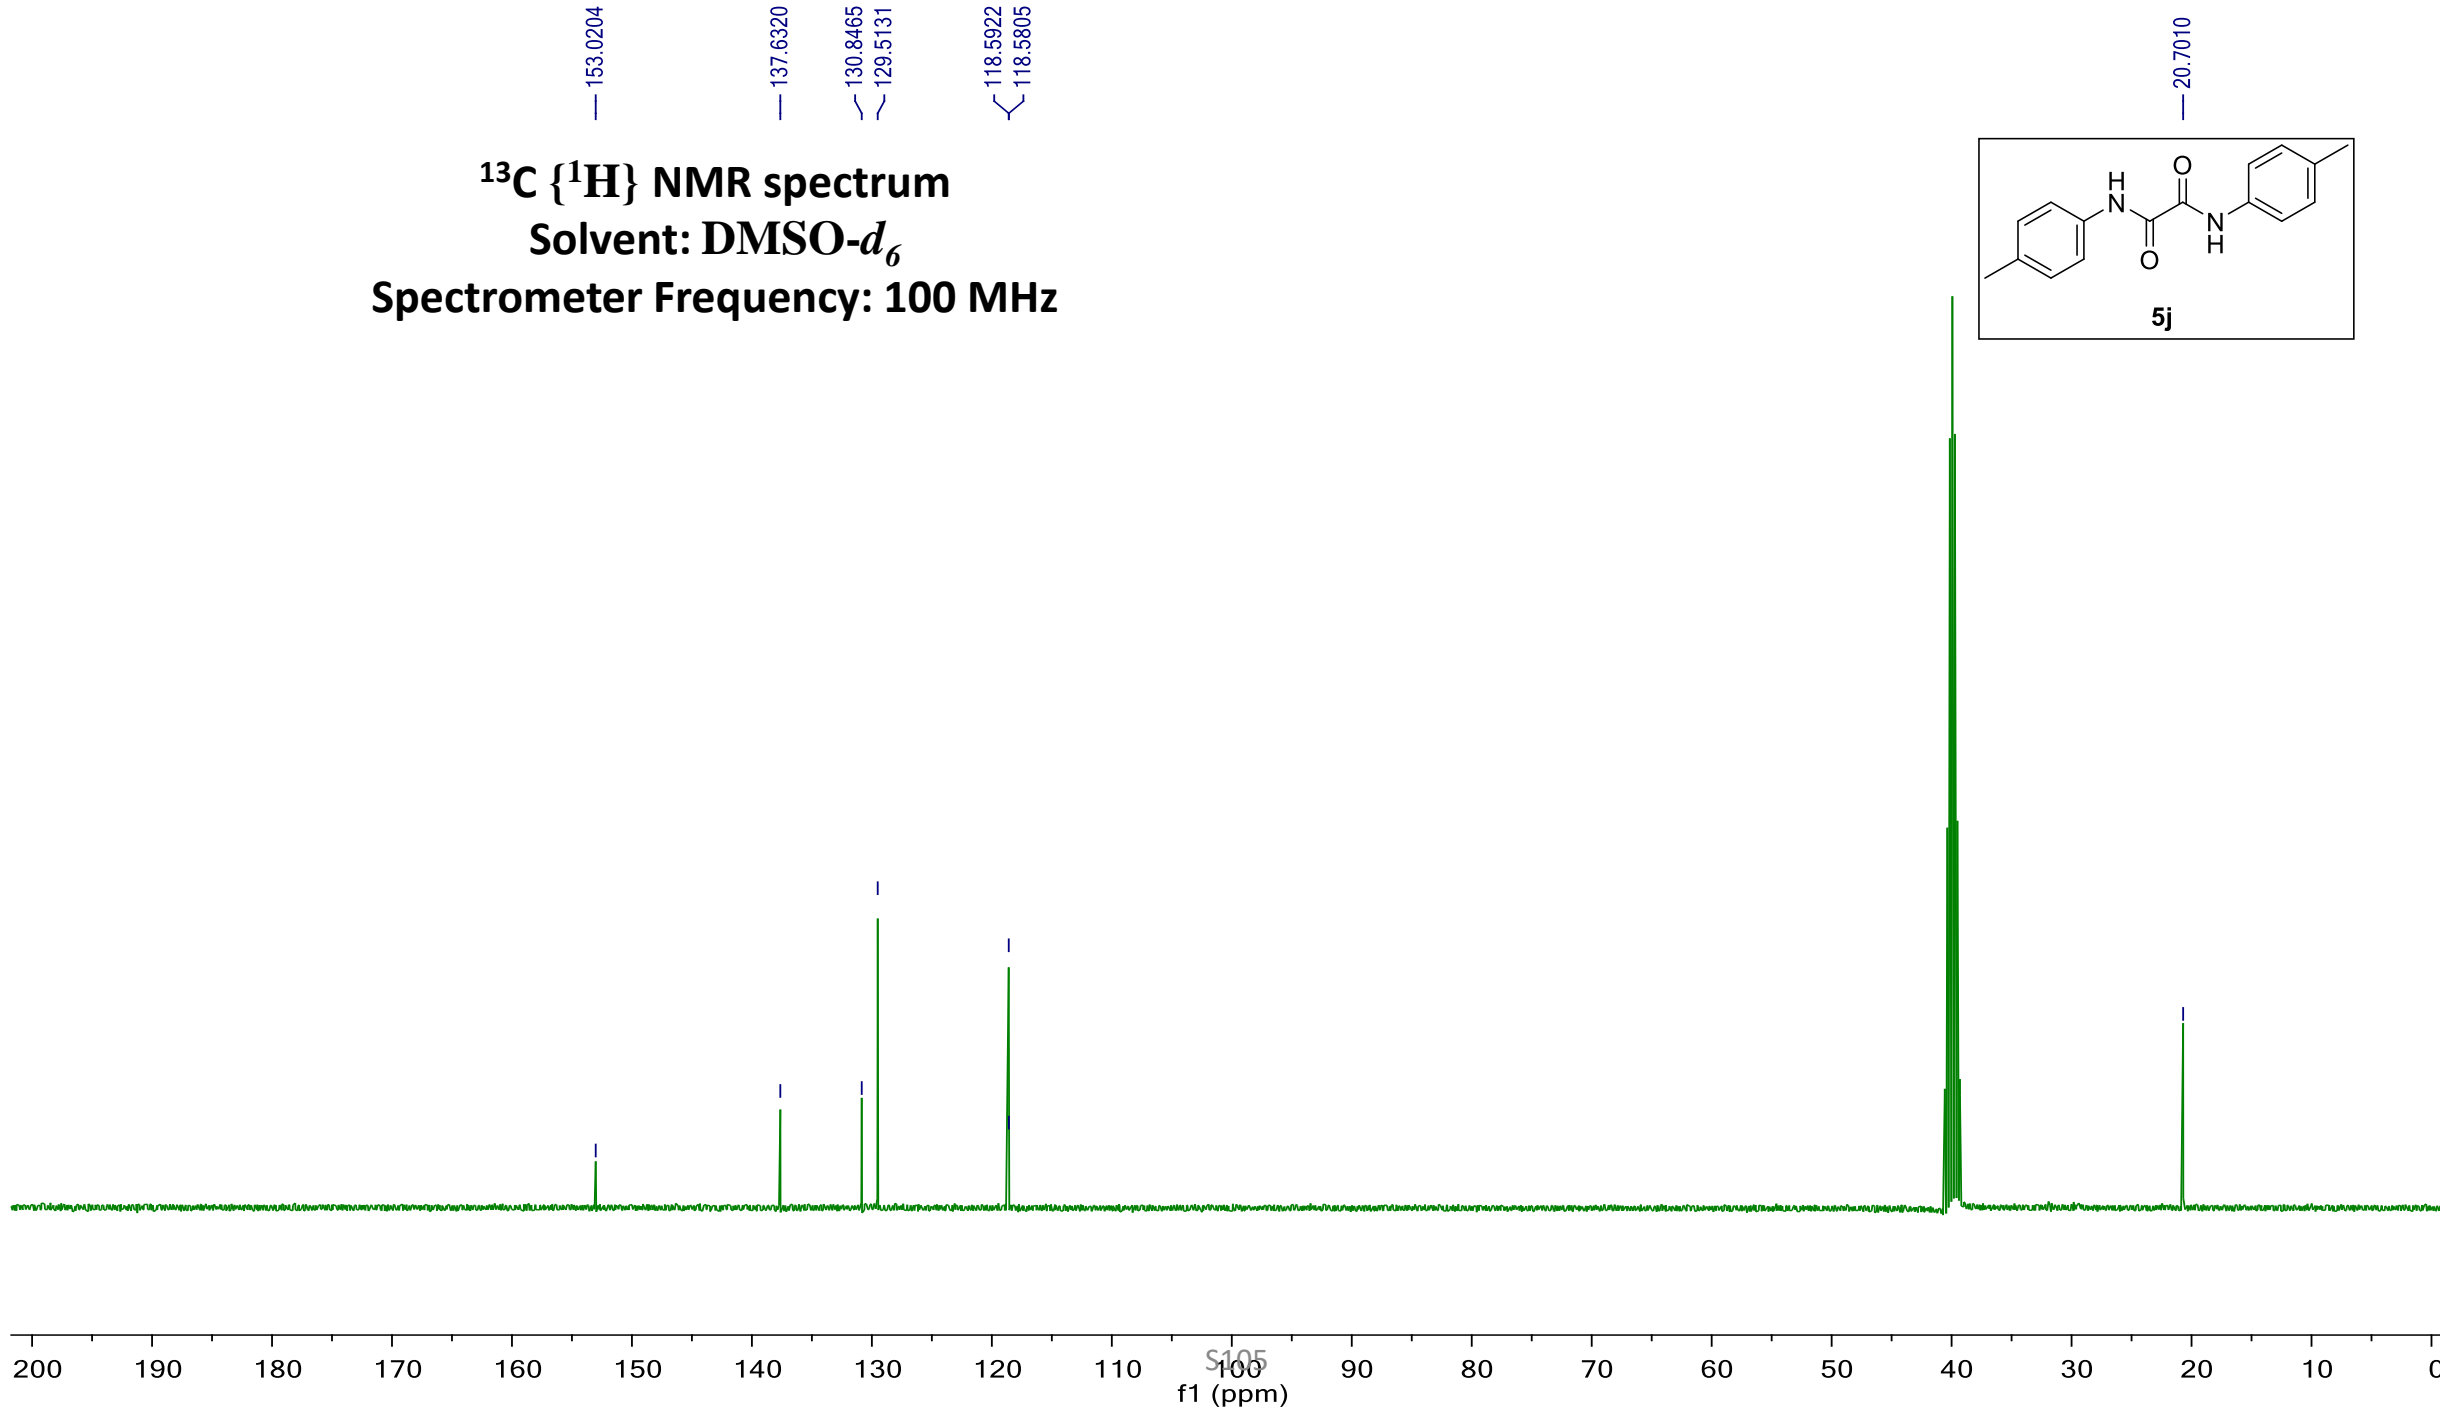

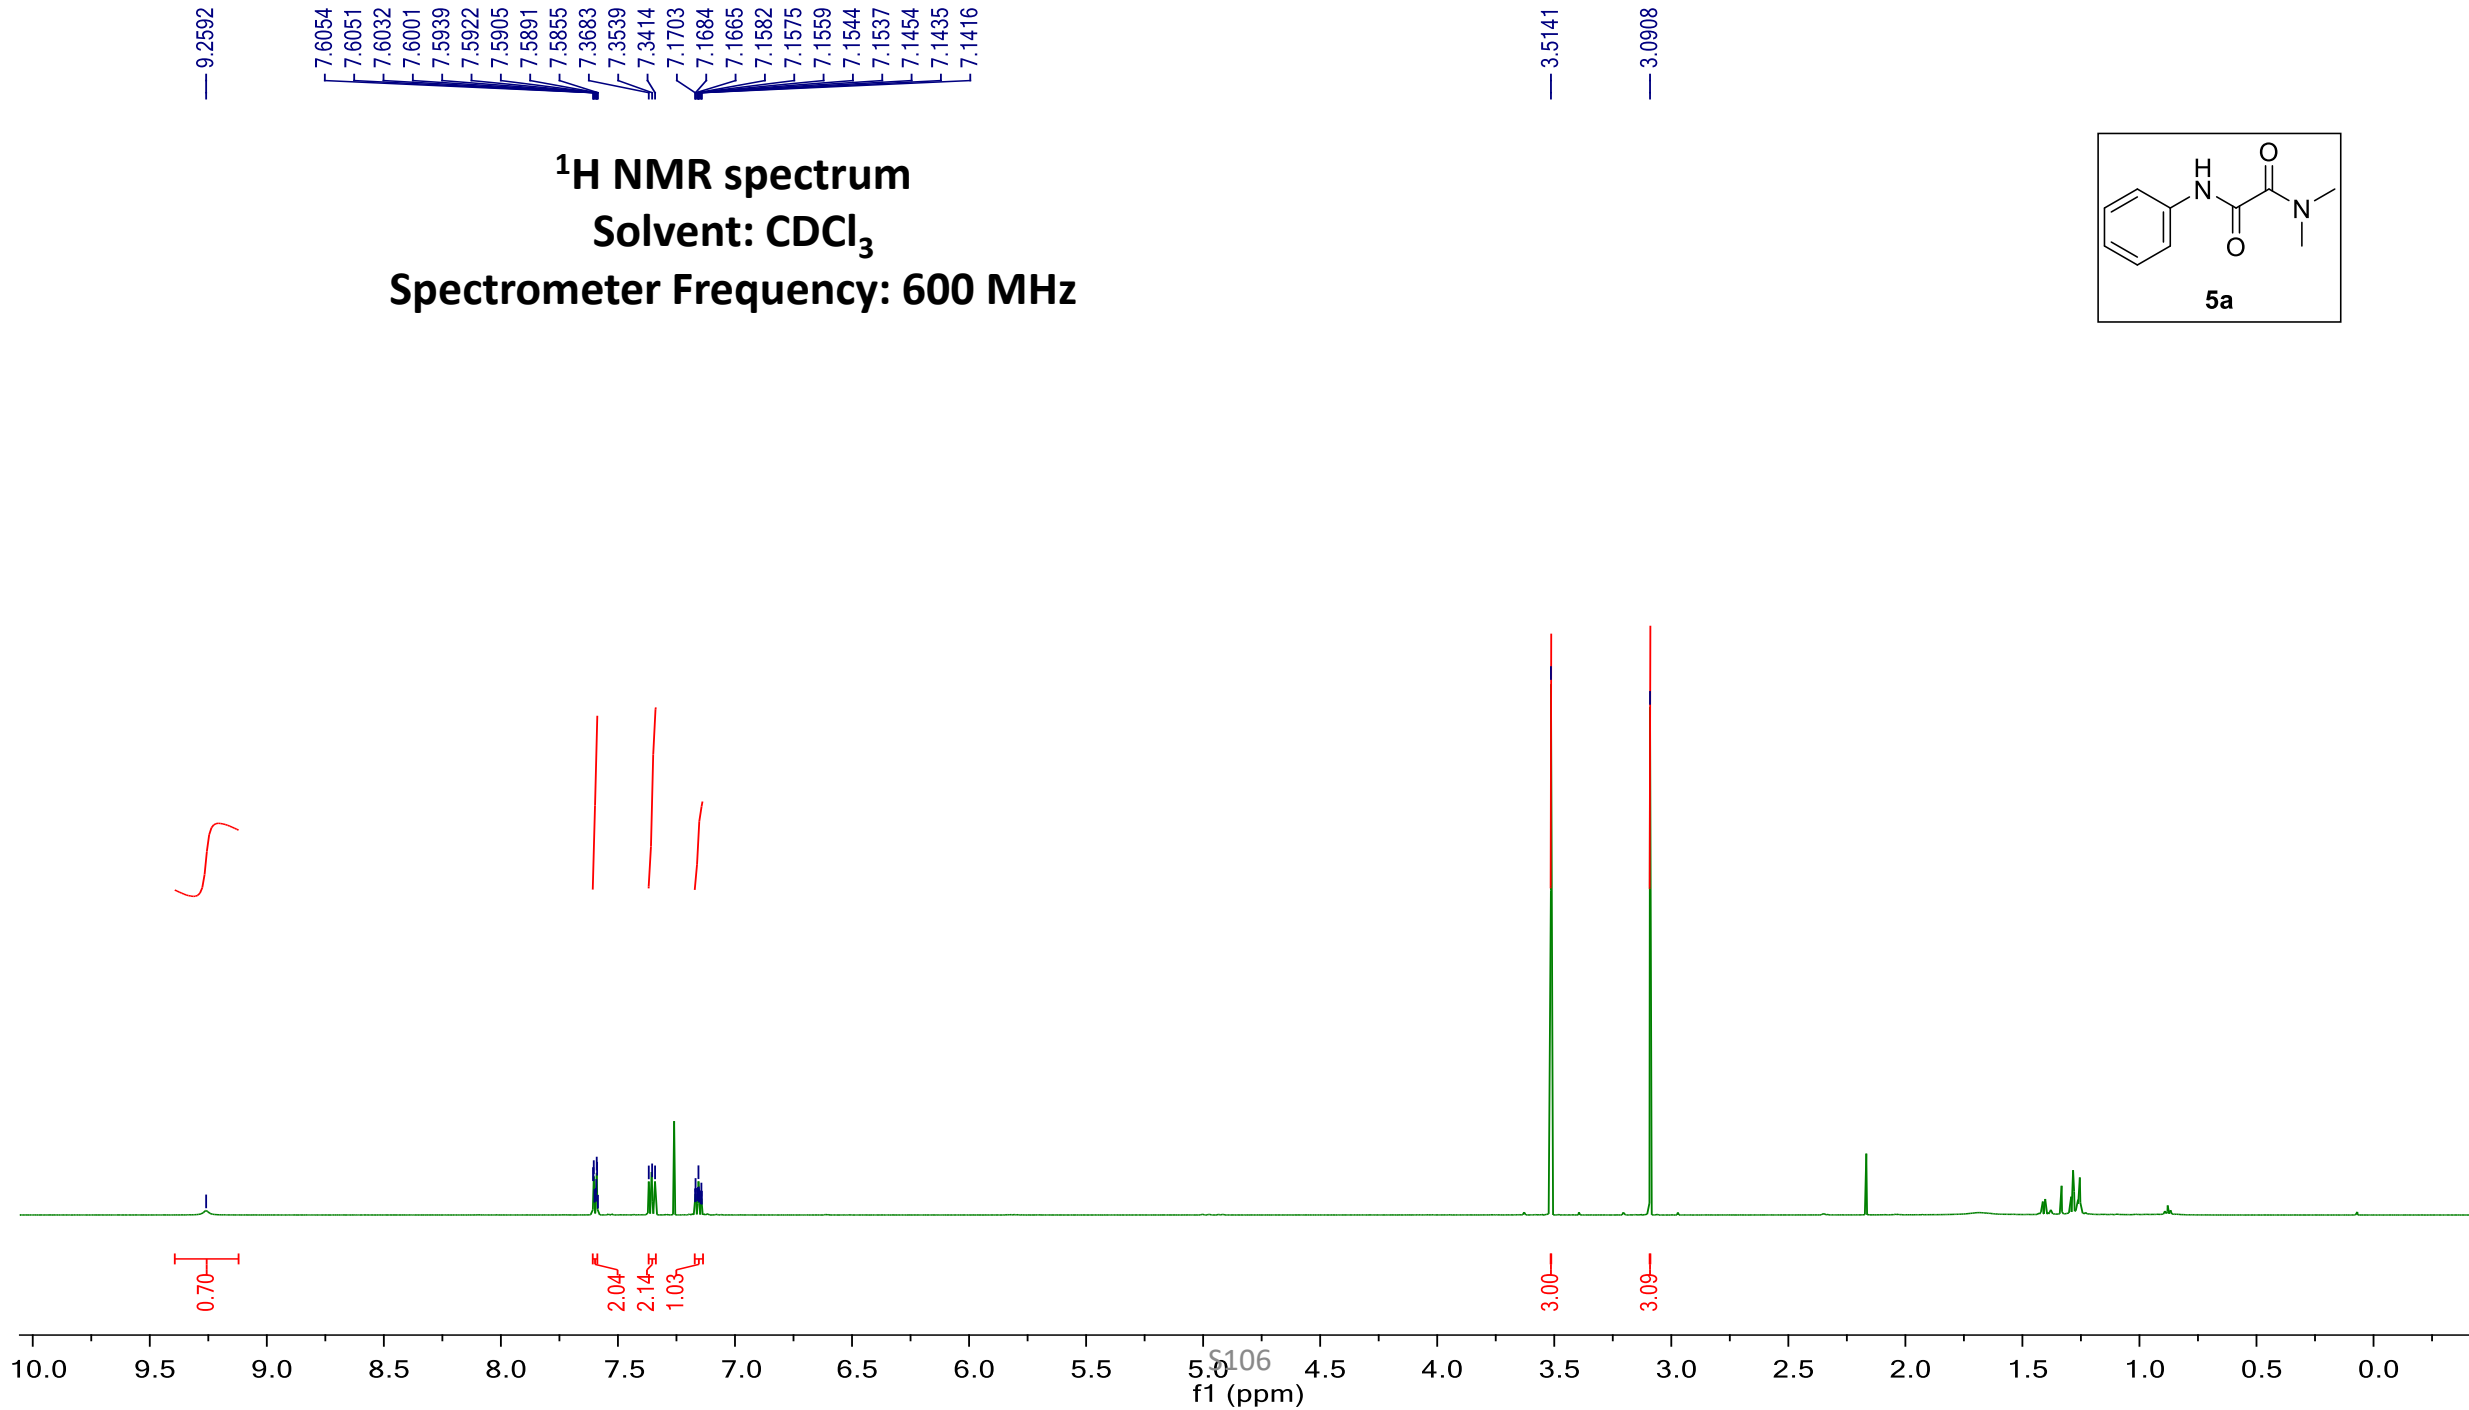

**$^{13}\text{C}$   $\{^1\text{H}\}$  NMR spectrum**  
**Solvent:  $\text{CDCl}_3$**   
**Spectrometer Frequency: 151 MHz**

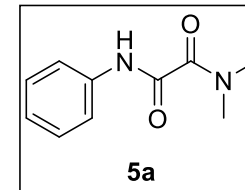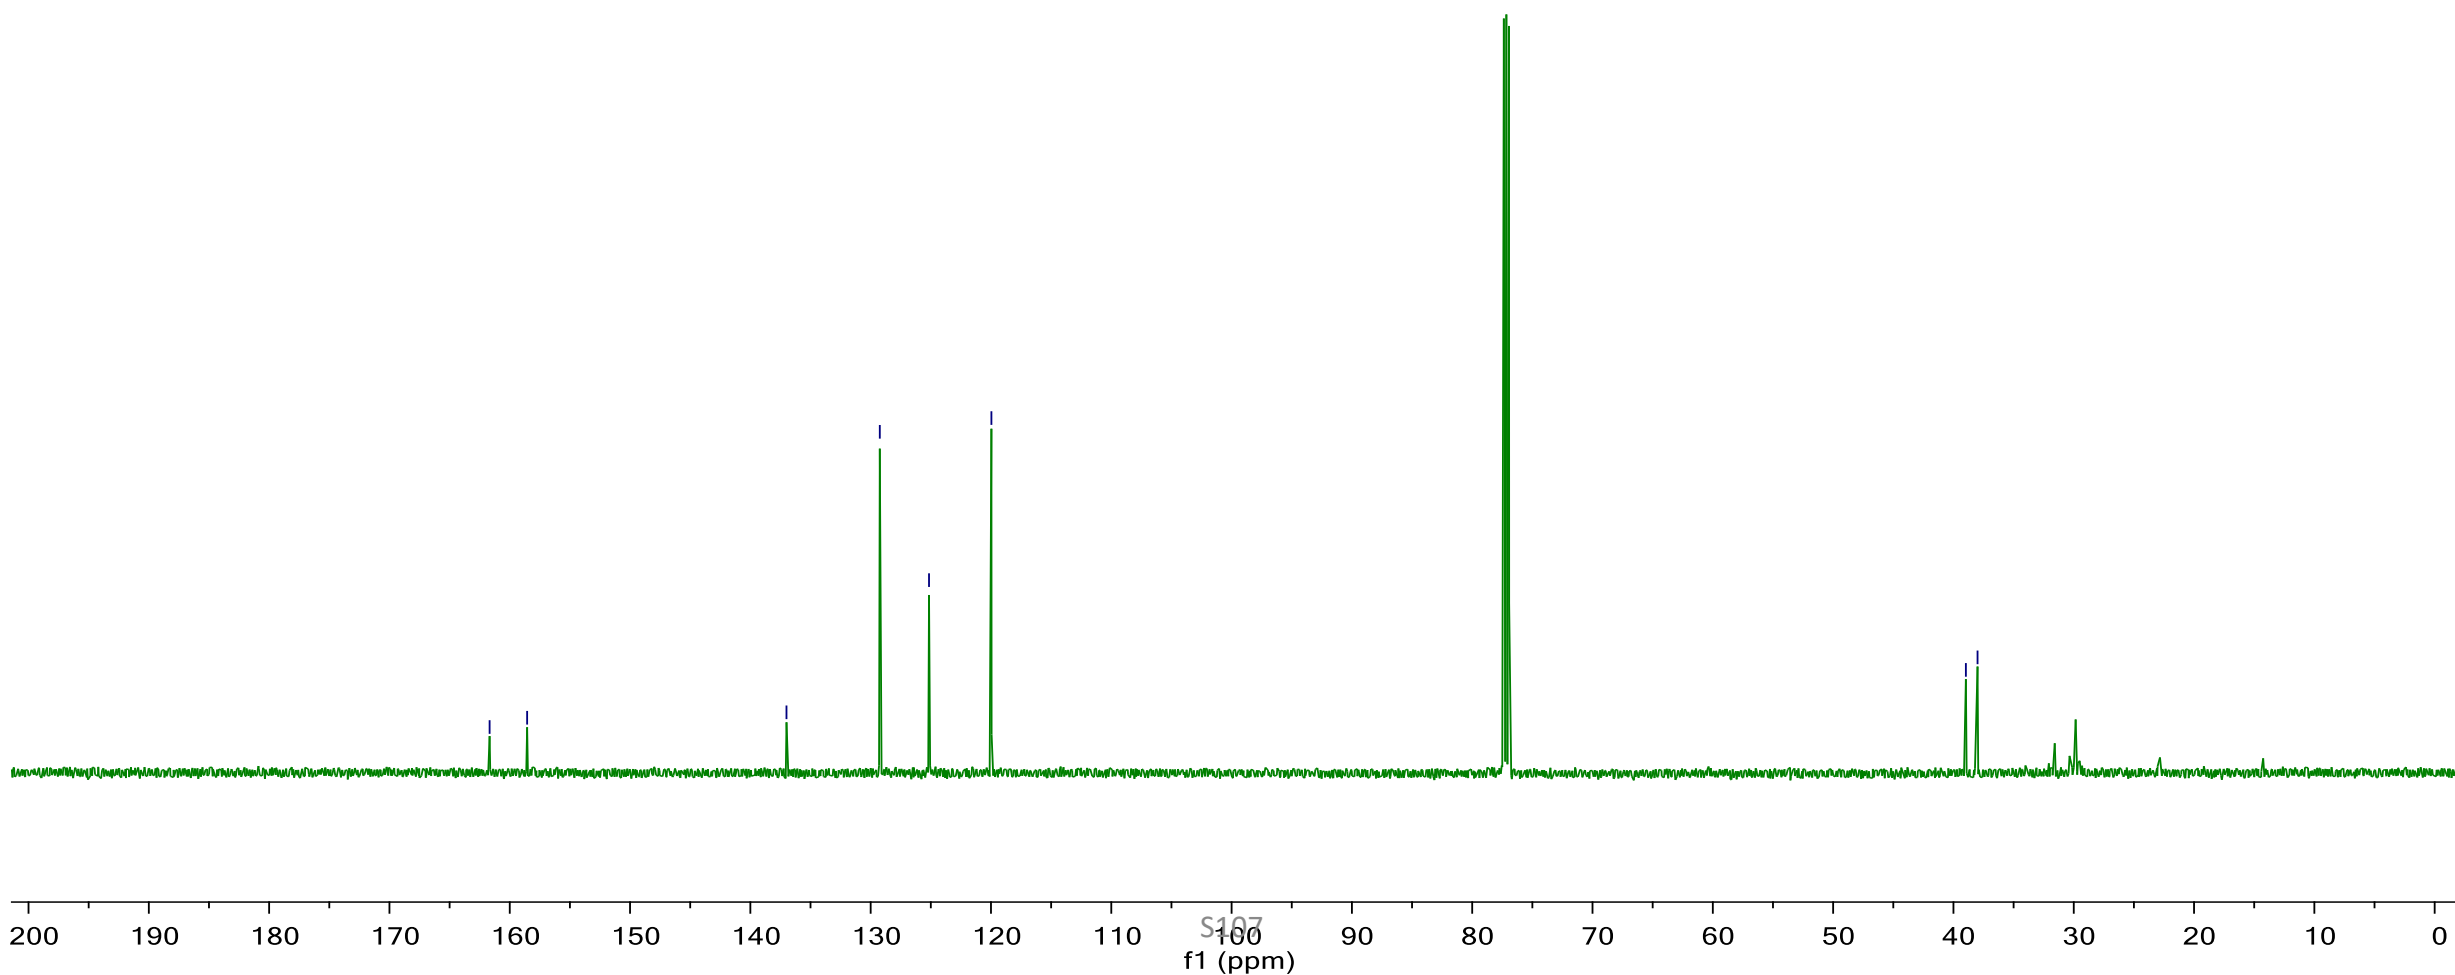

**$^1\text{H}$  NMR spectrum**  
**Solvent:  $\text{CDCl}_3$**   
**Spectrometer Frequency: 600 MHz**

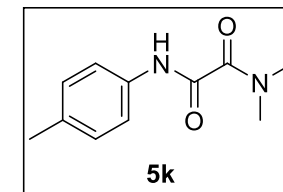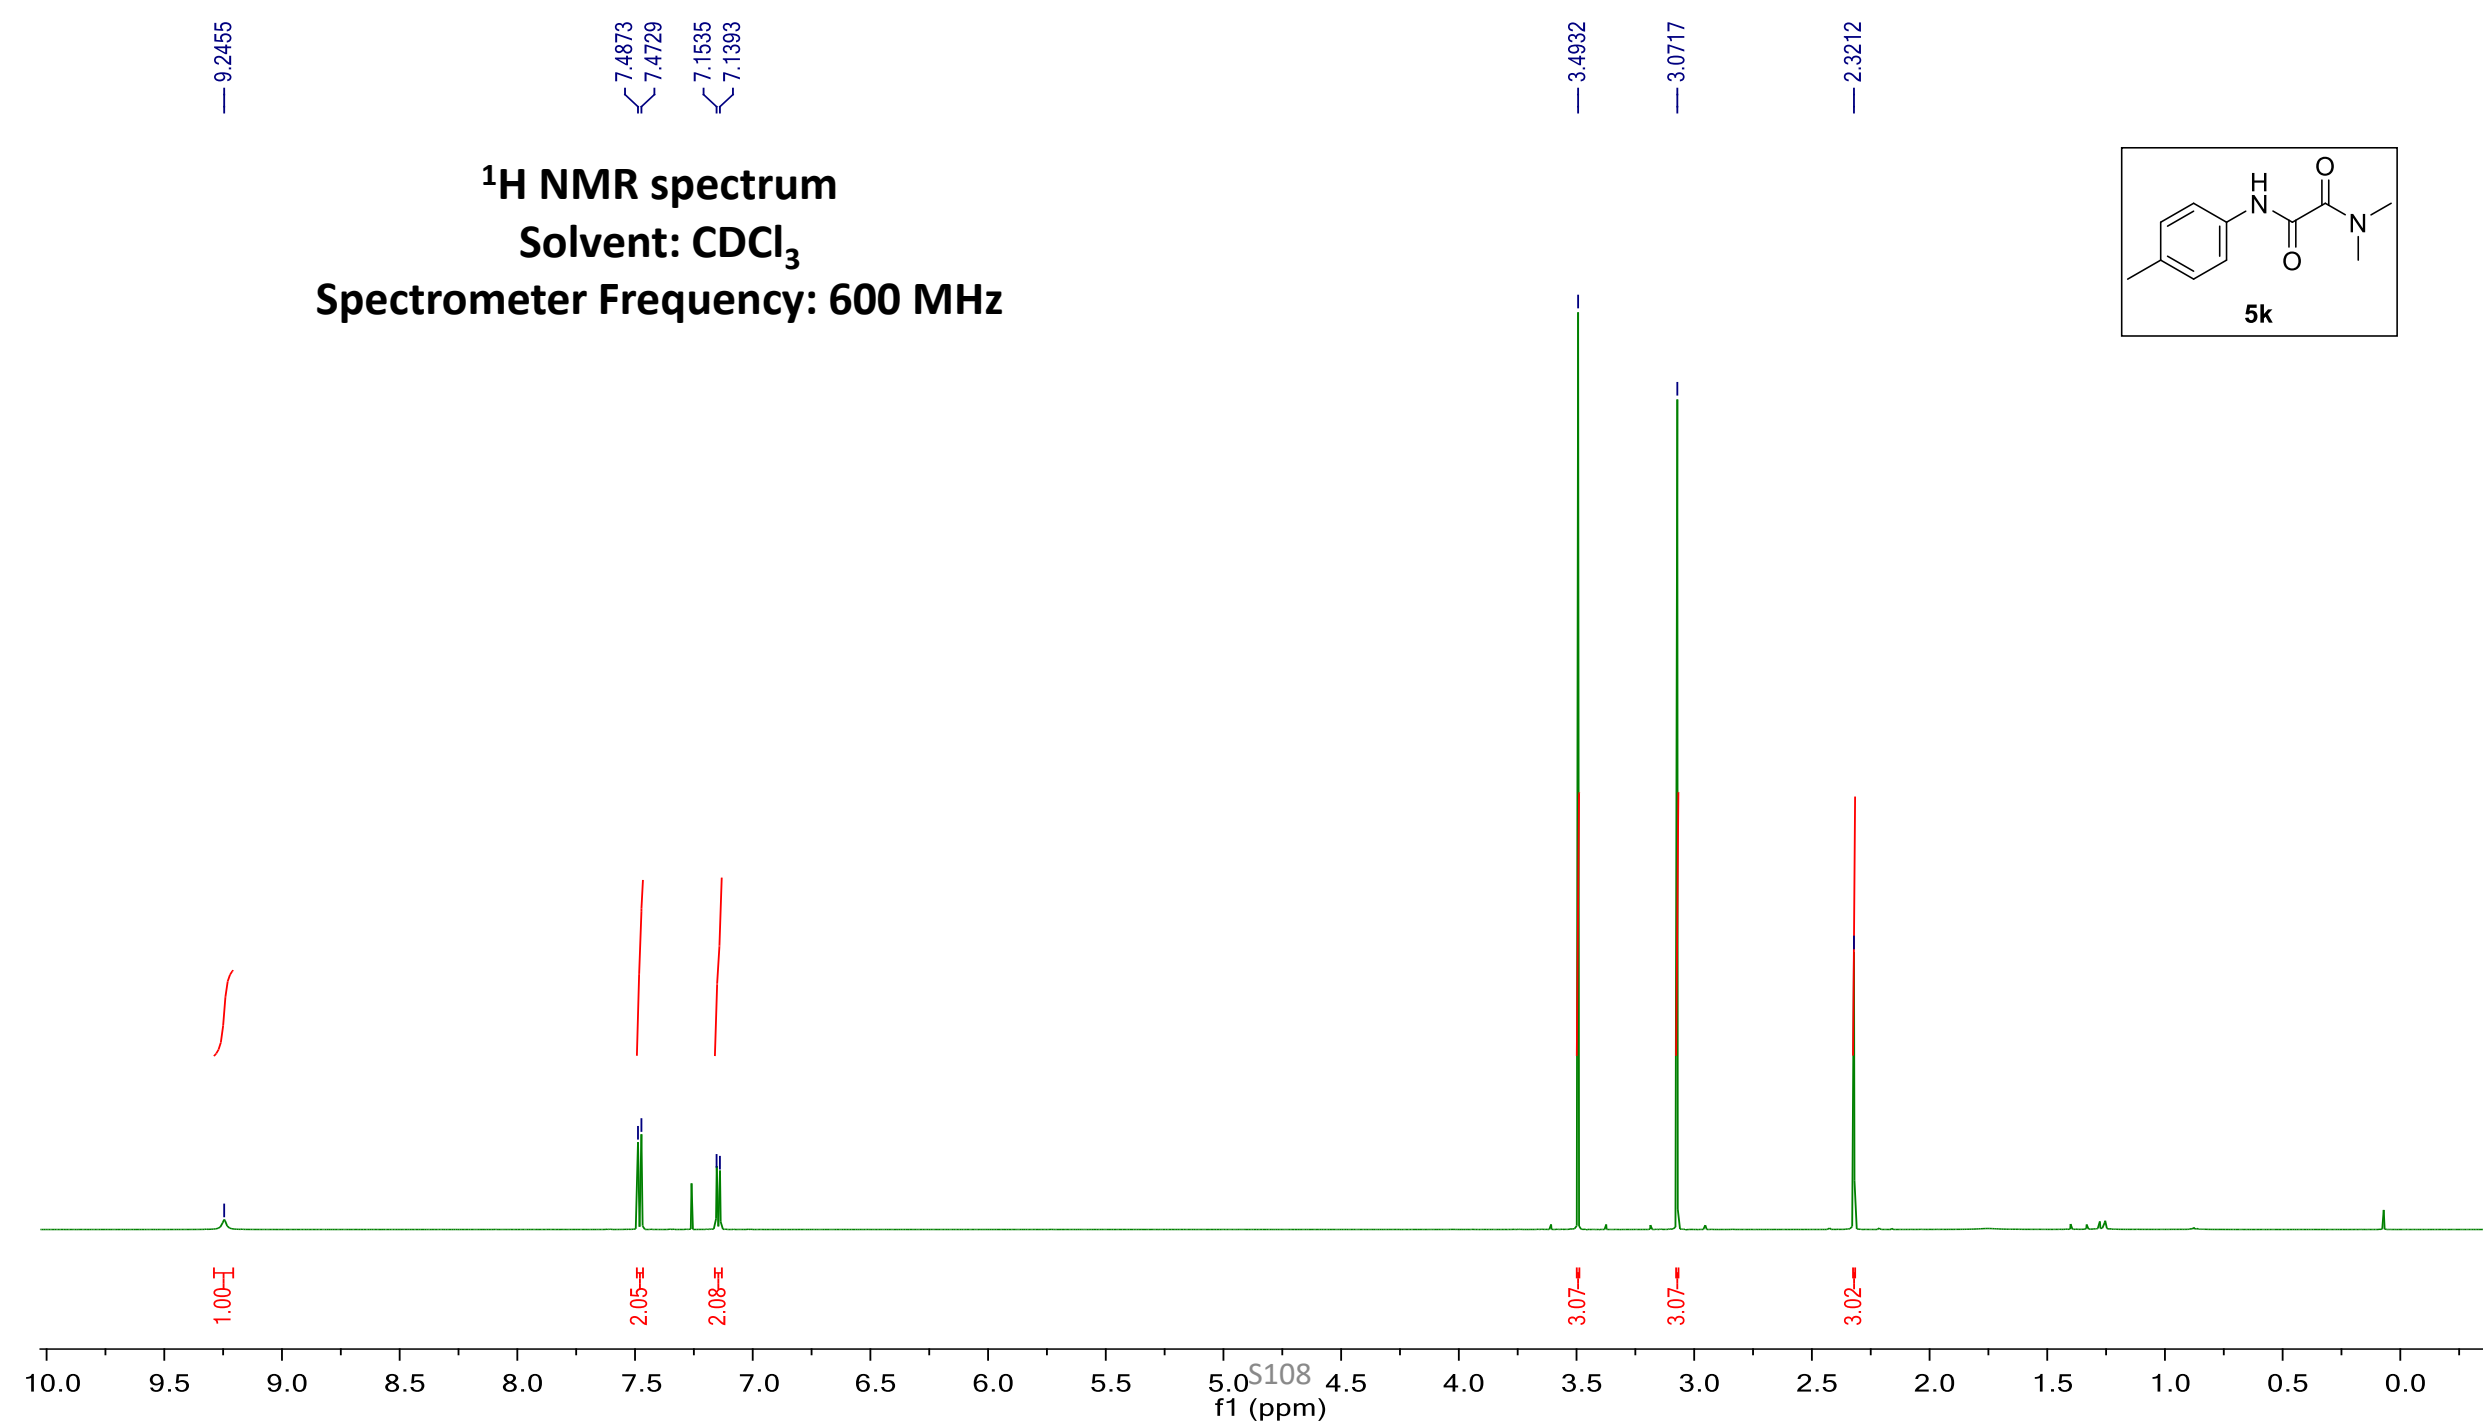

**$^{13}\text{C} \{^1\text{H}\}$  NMR spectrum**  
**Solvent:  $\text{CDCl}_3$**   
**Spectrometer Frequency: 151 MHz**

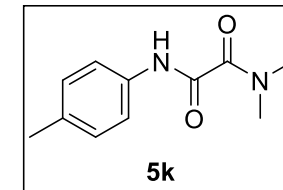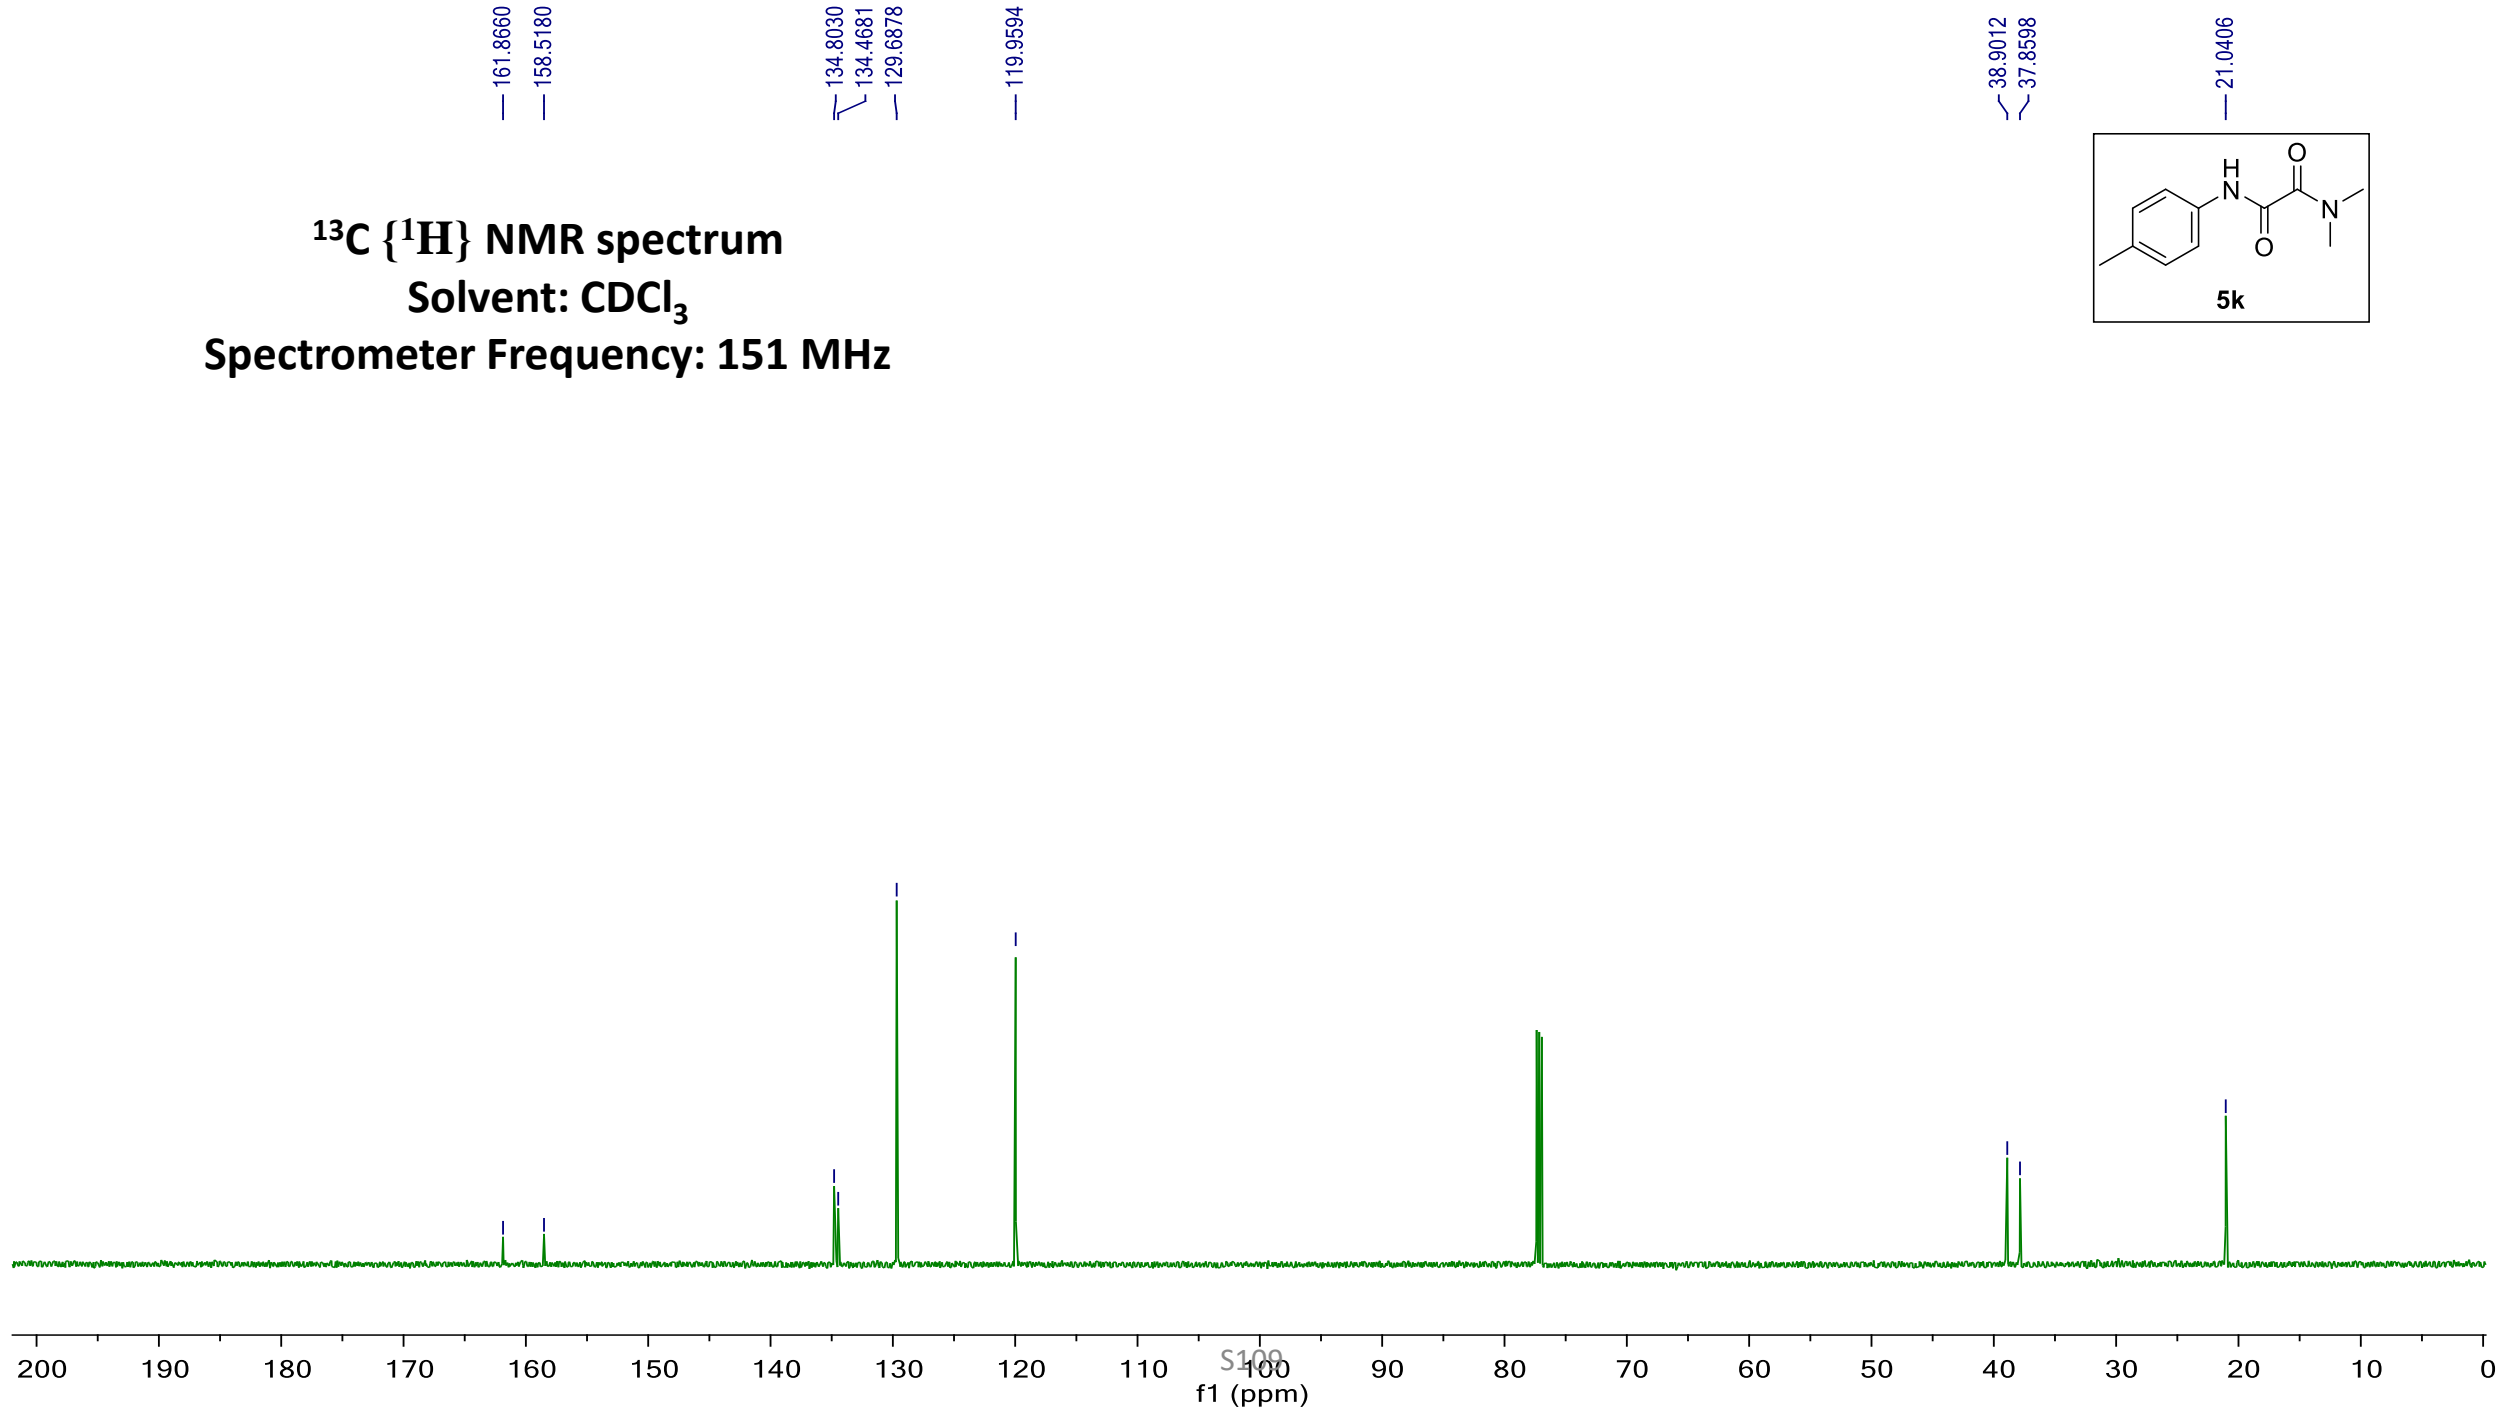

**$^1\text{H}$  NMR spectrum**  
**Solvent:  $\text{CDCl}_3$**   
**Spectrometer Frequency: 600 MHz**

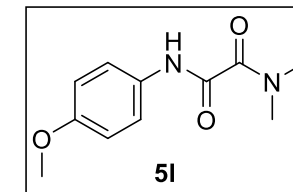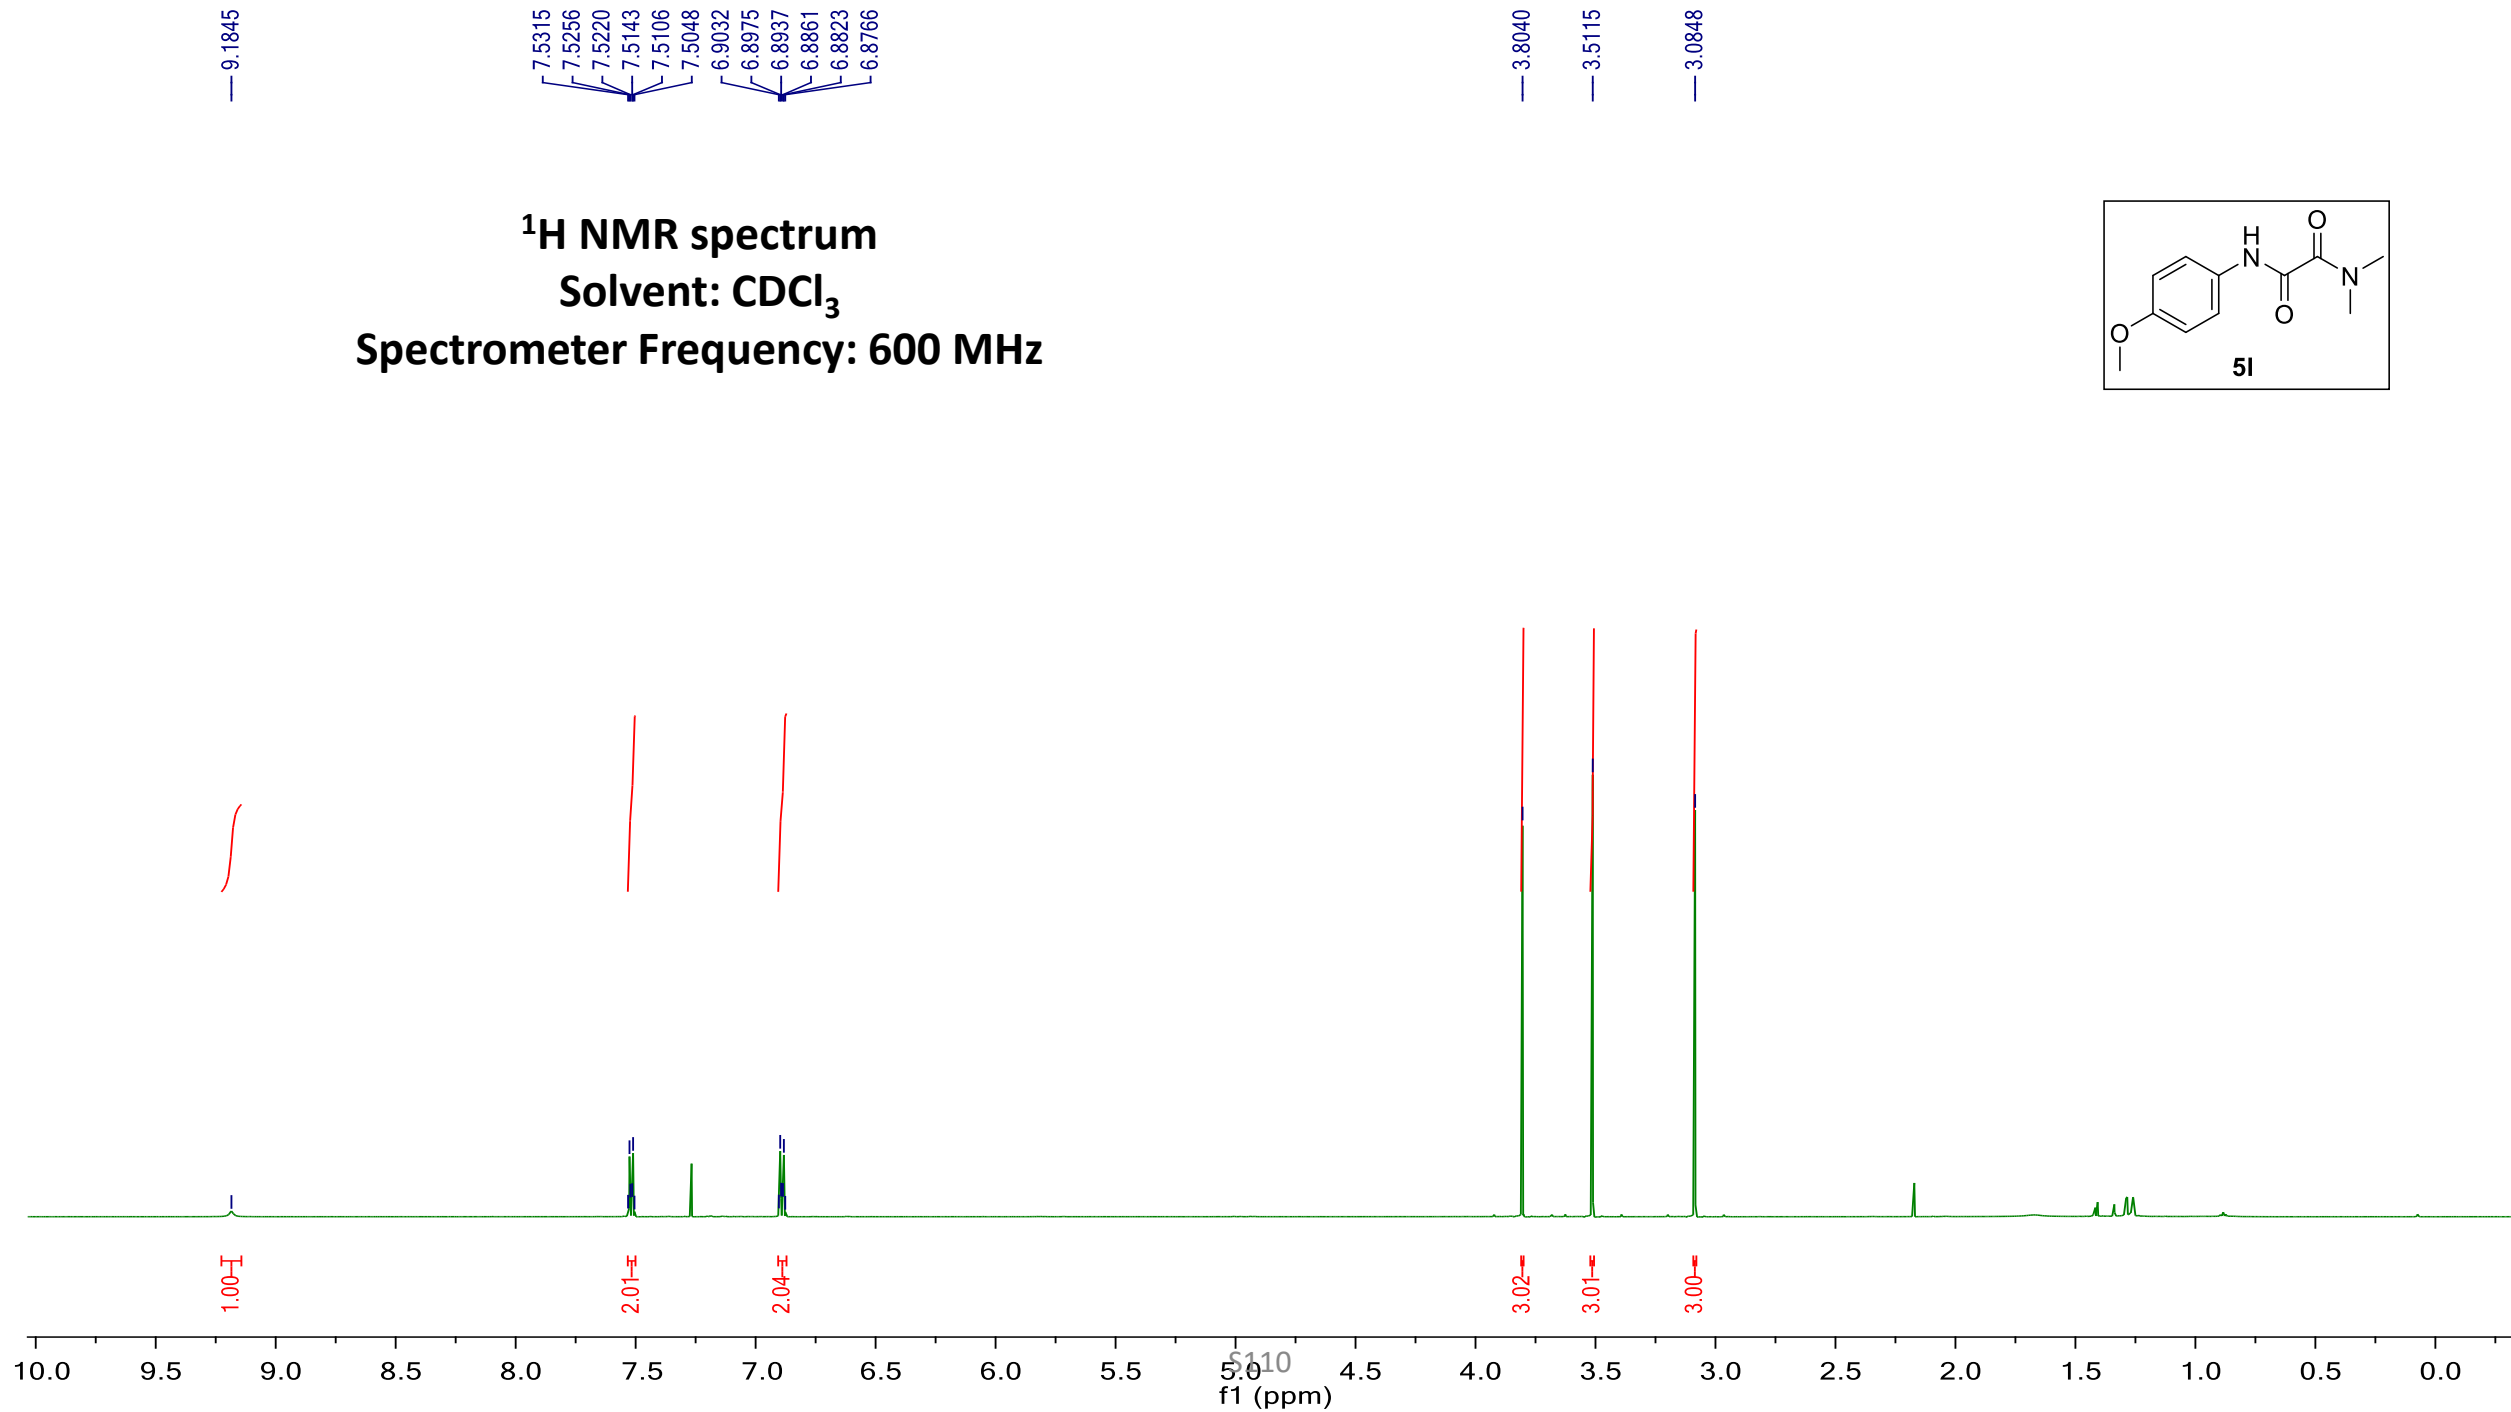

**$^{13}\text{C}$  { $^1\text{H}$ } NMR spectrum**  
**Solvent:  $\text{CDCl}_3$**   
**Spectrometer Frequency: 151 MHz**

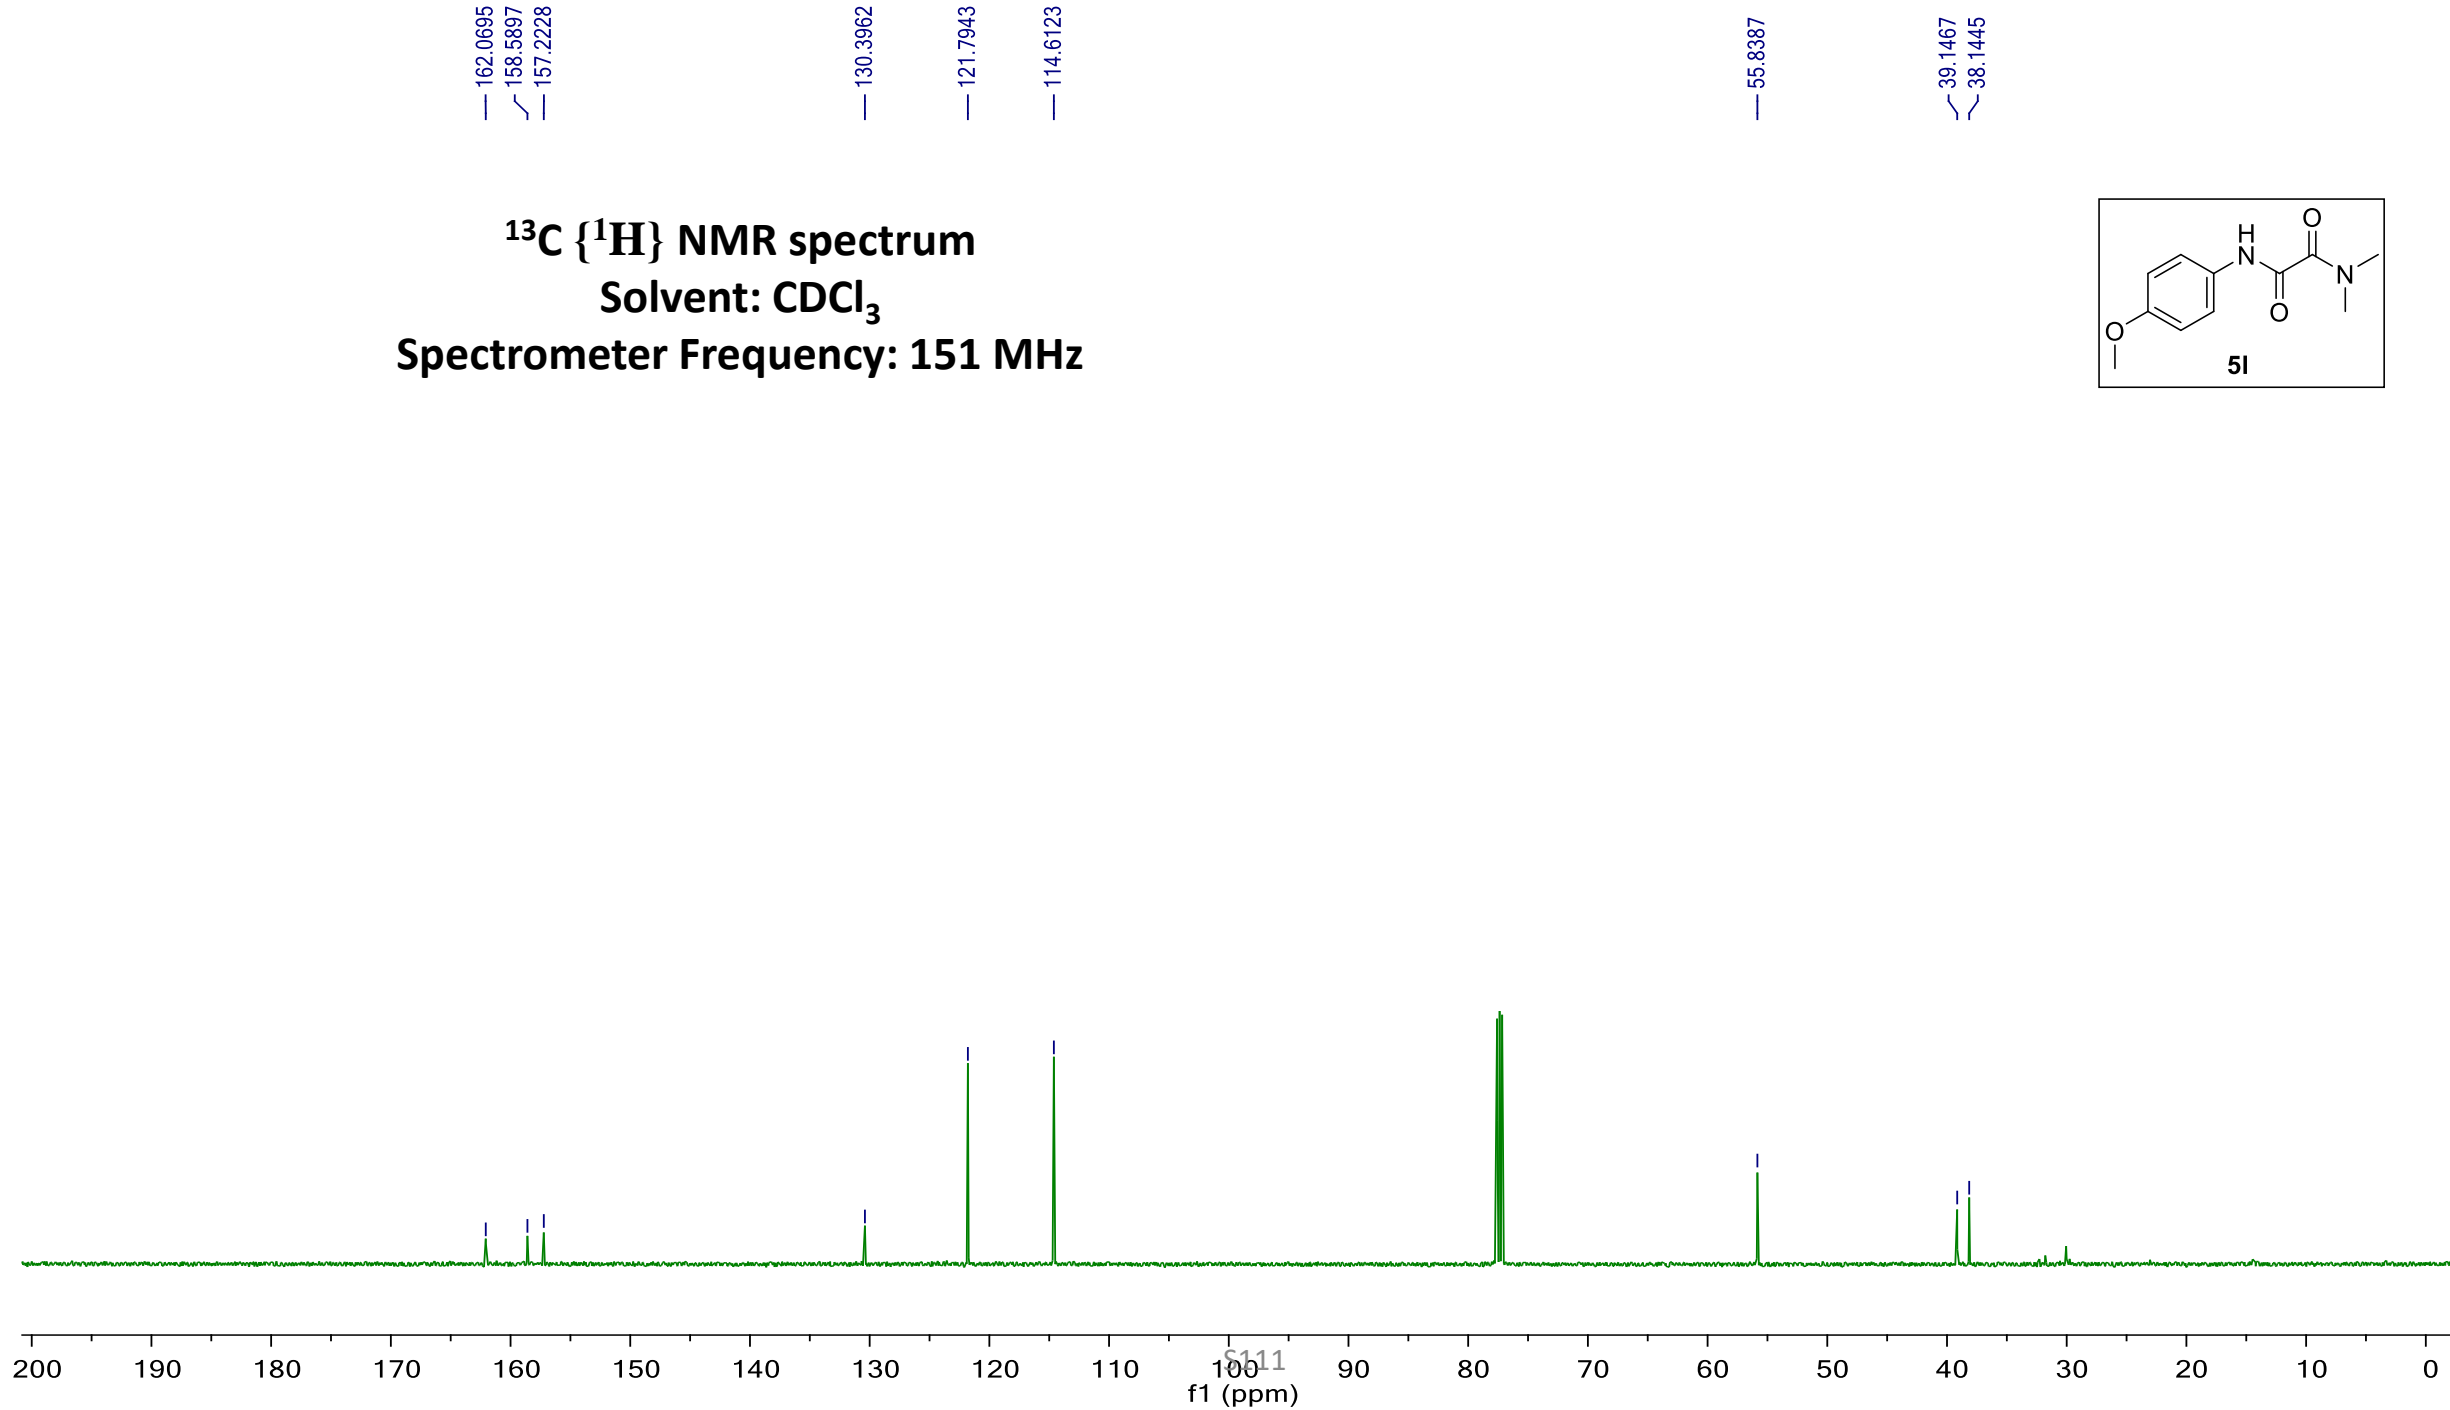

**$^1\text{H}$  NMR spectrum**  
**Solvent:  $\text{CDCl}_3$**   
**Spectrometer Frequency: 600 MHz**

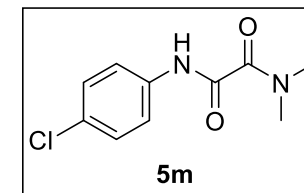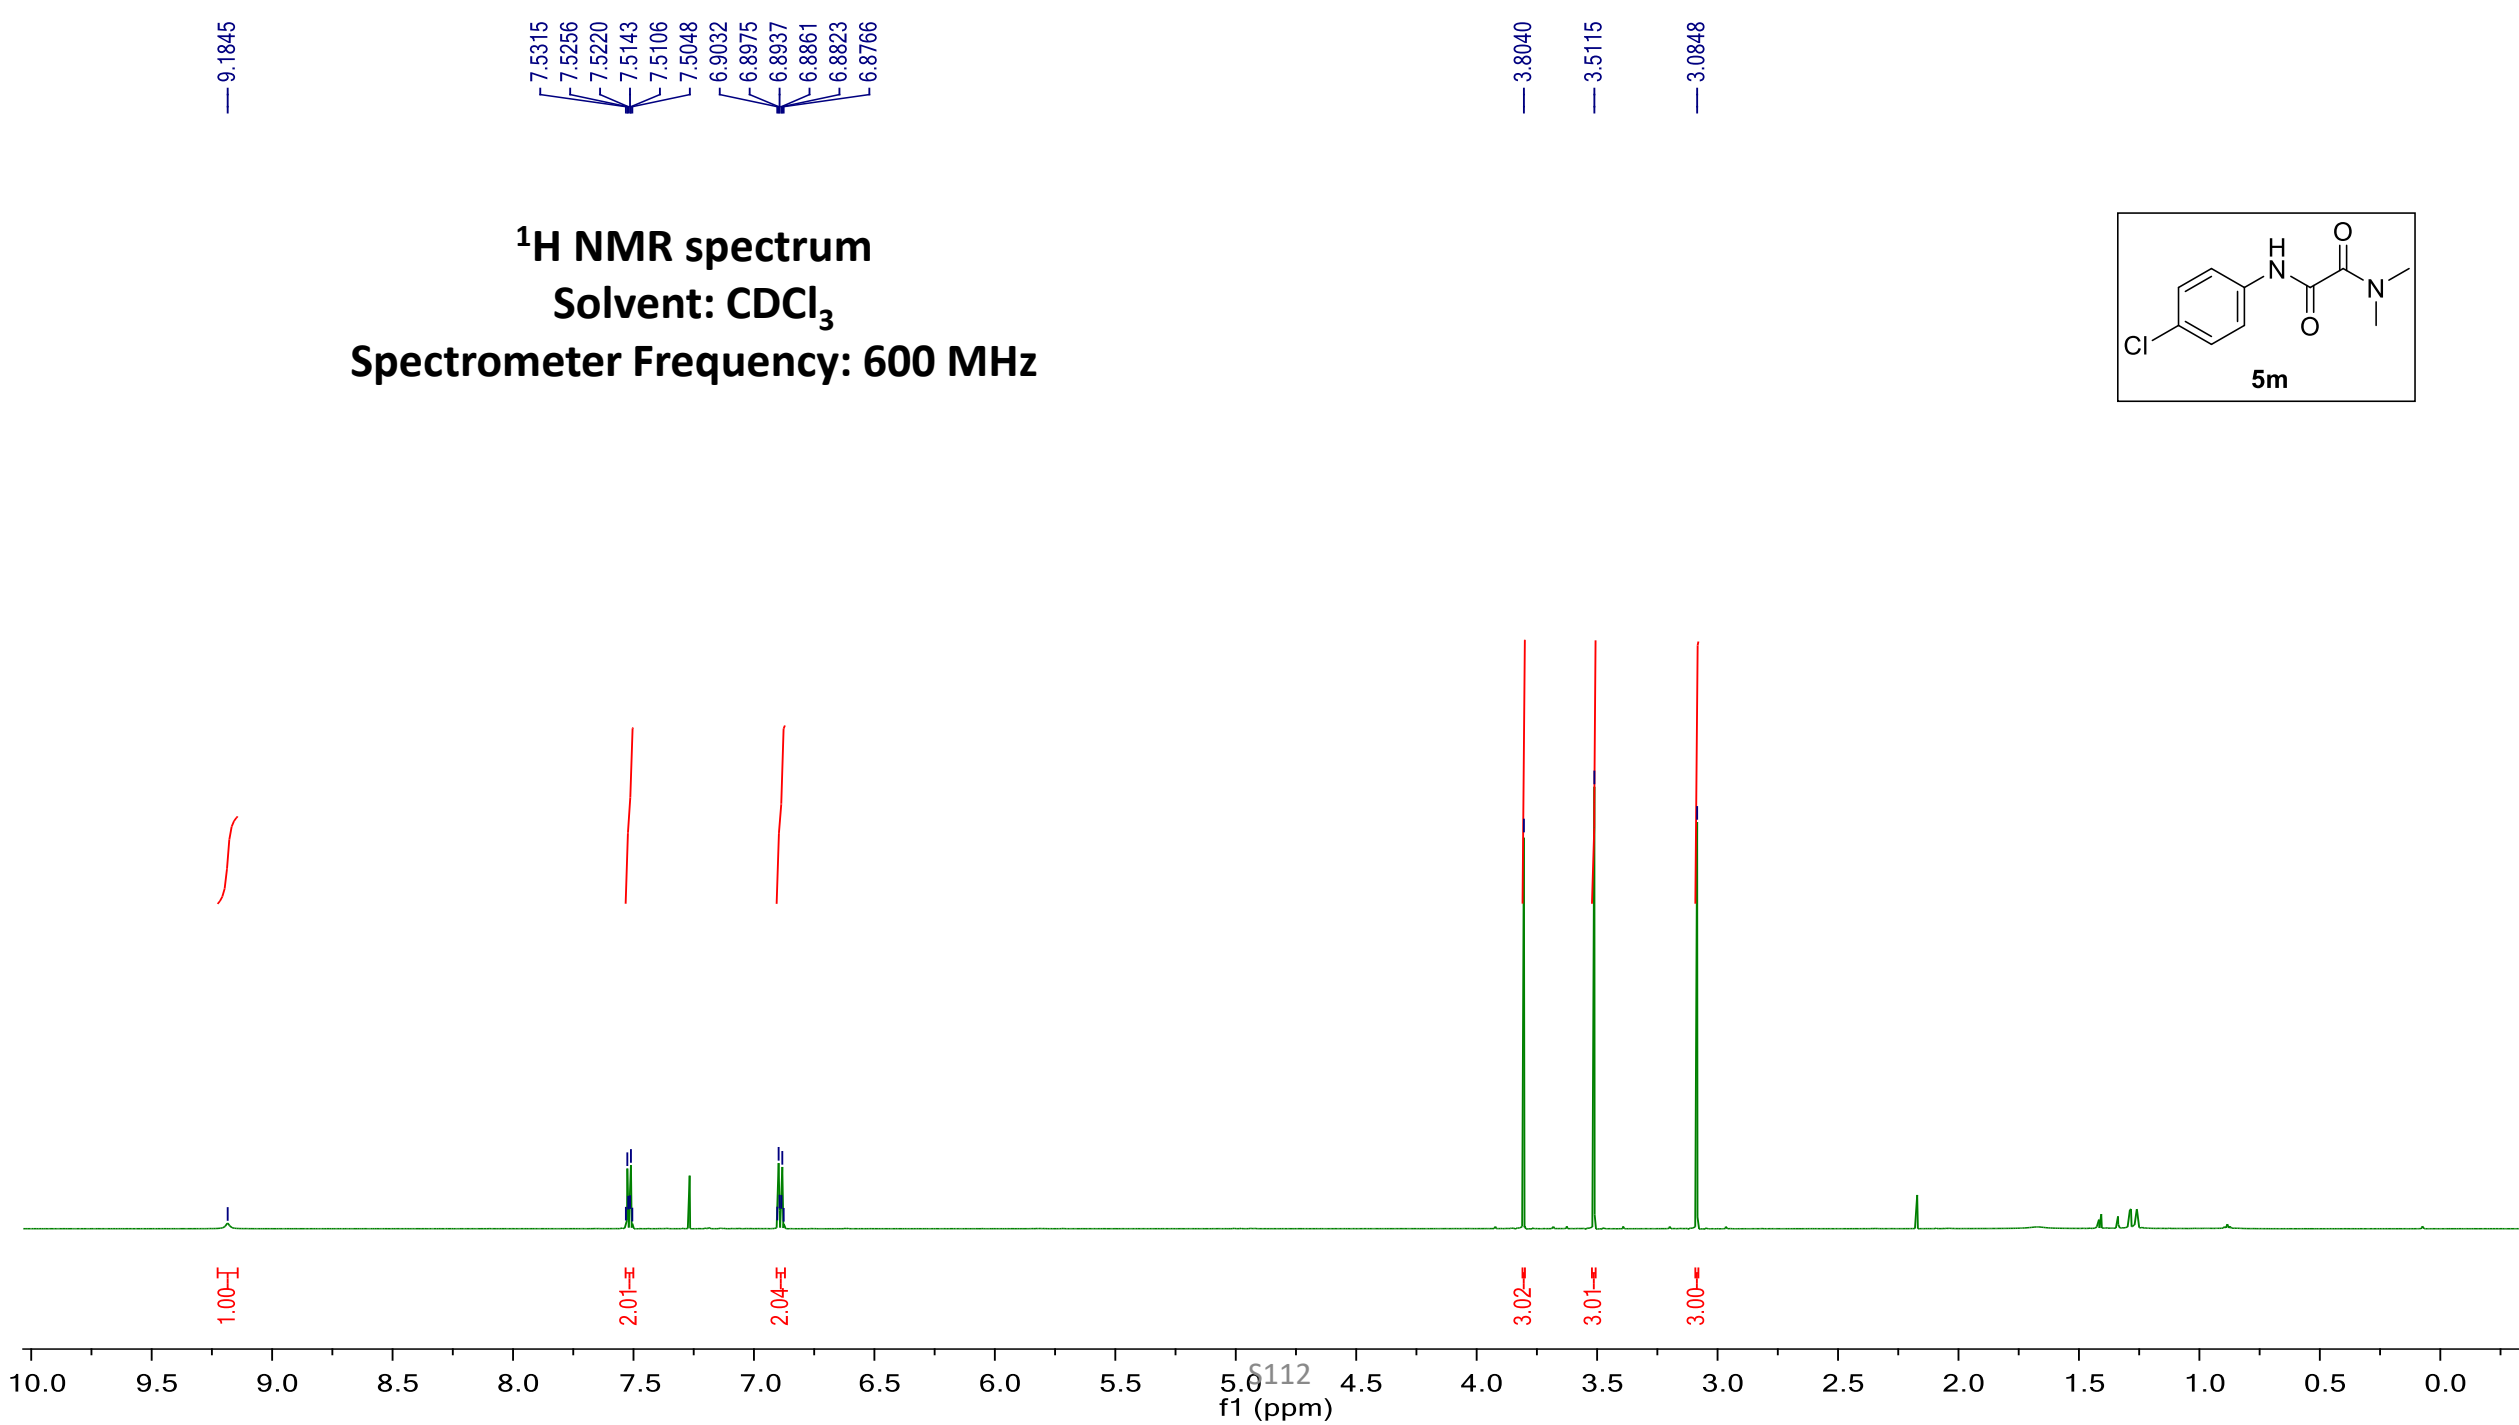

**$^{13}\text{C}$   $\{^1\text{H}\}$  NMR spectrum**  
**Solvent:  $\text{CDCl}_3$**   
**Spectrometer Frequency: 151 MHz**

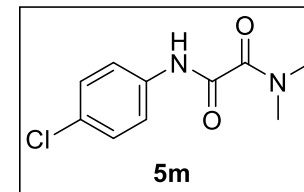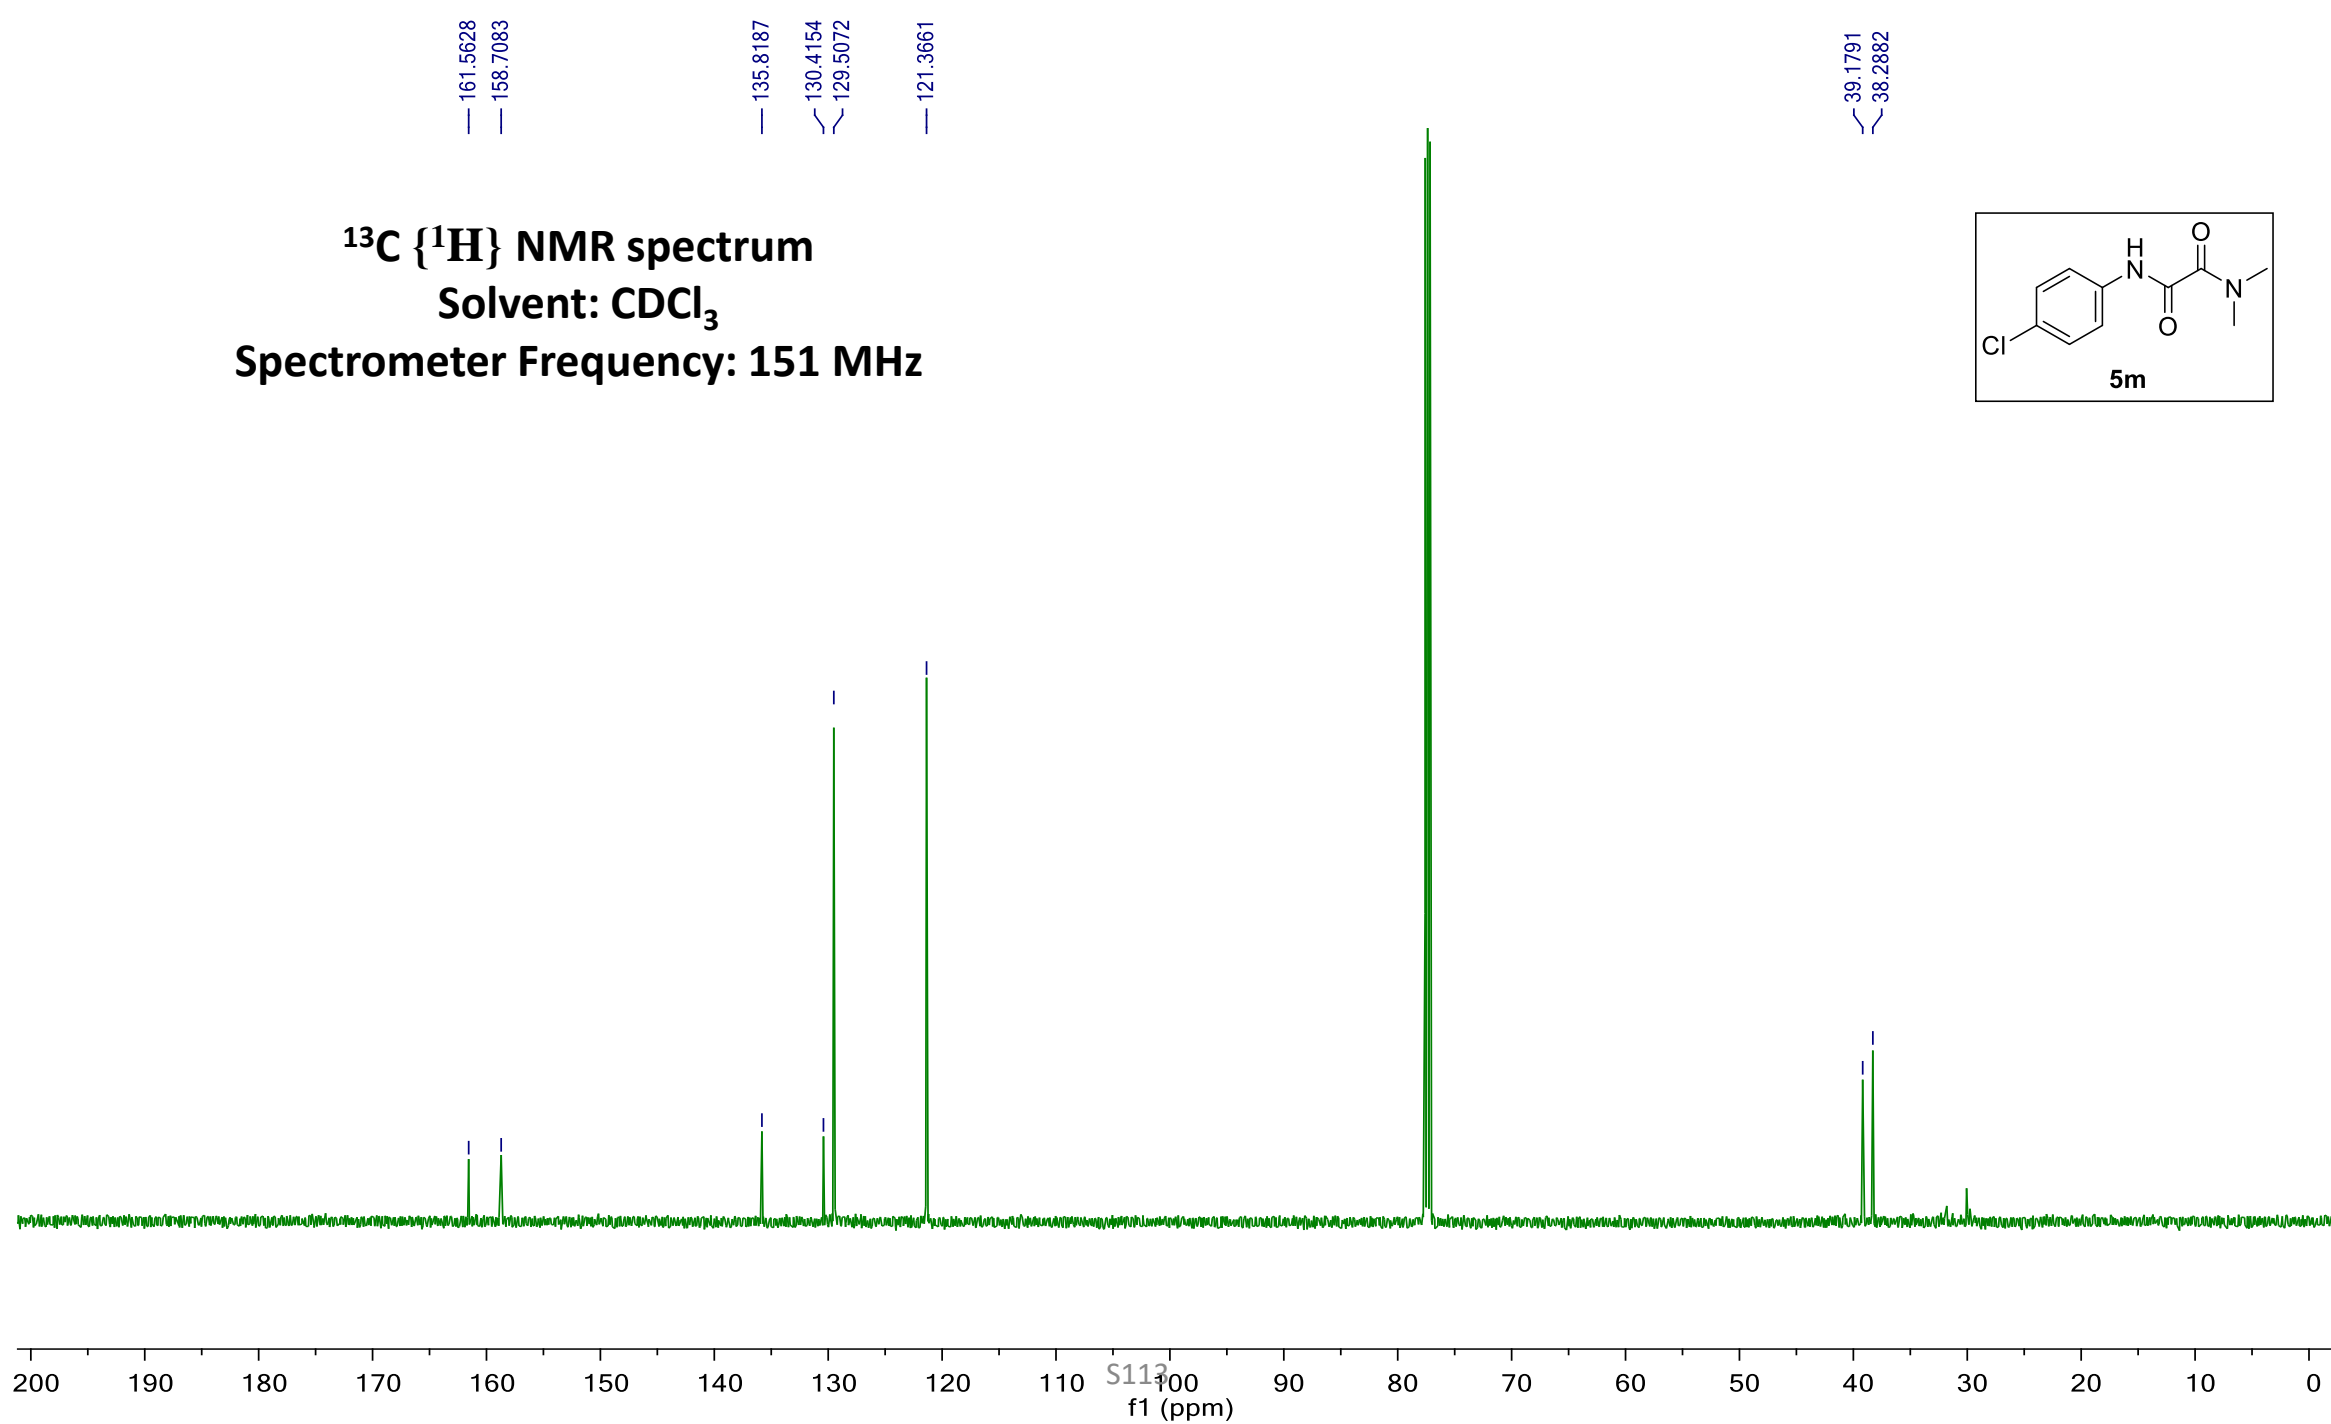

**$^1\text{H}$  NMR spectrum**  
**Solvent:  $\text{CDCl}_3$**   
**Spectrometer Frequency: 400 MHz**

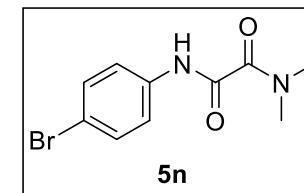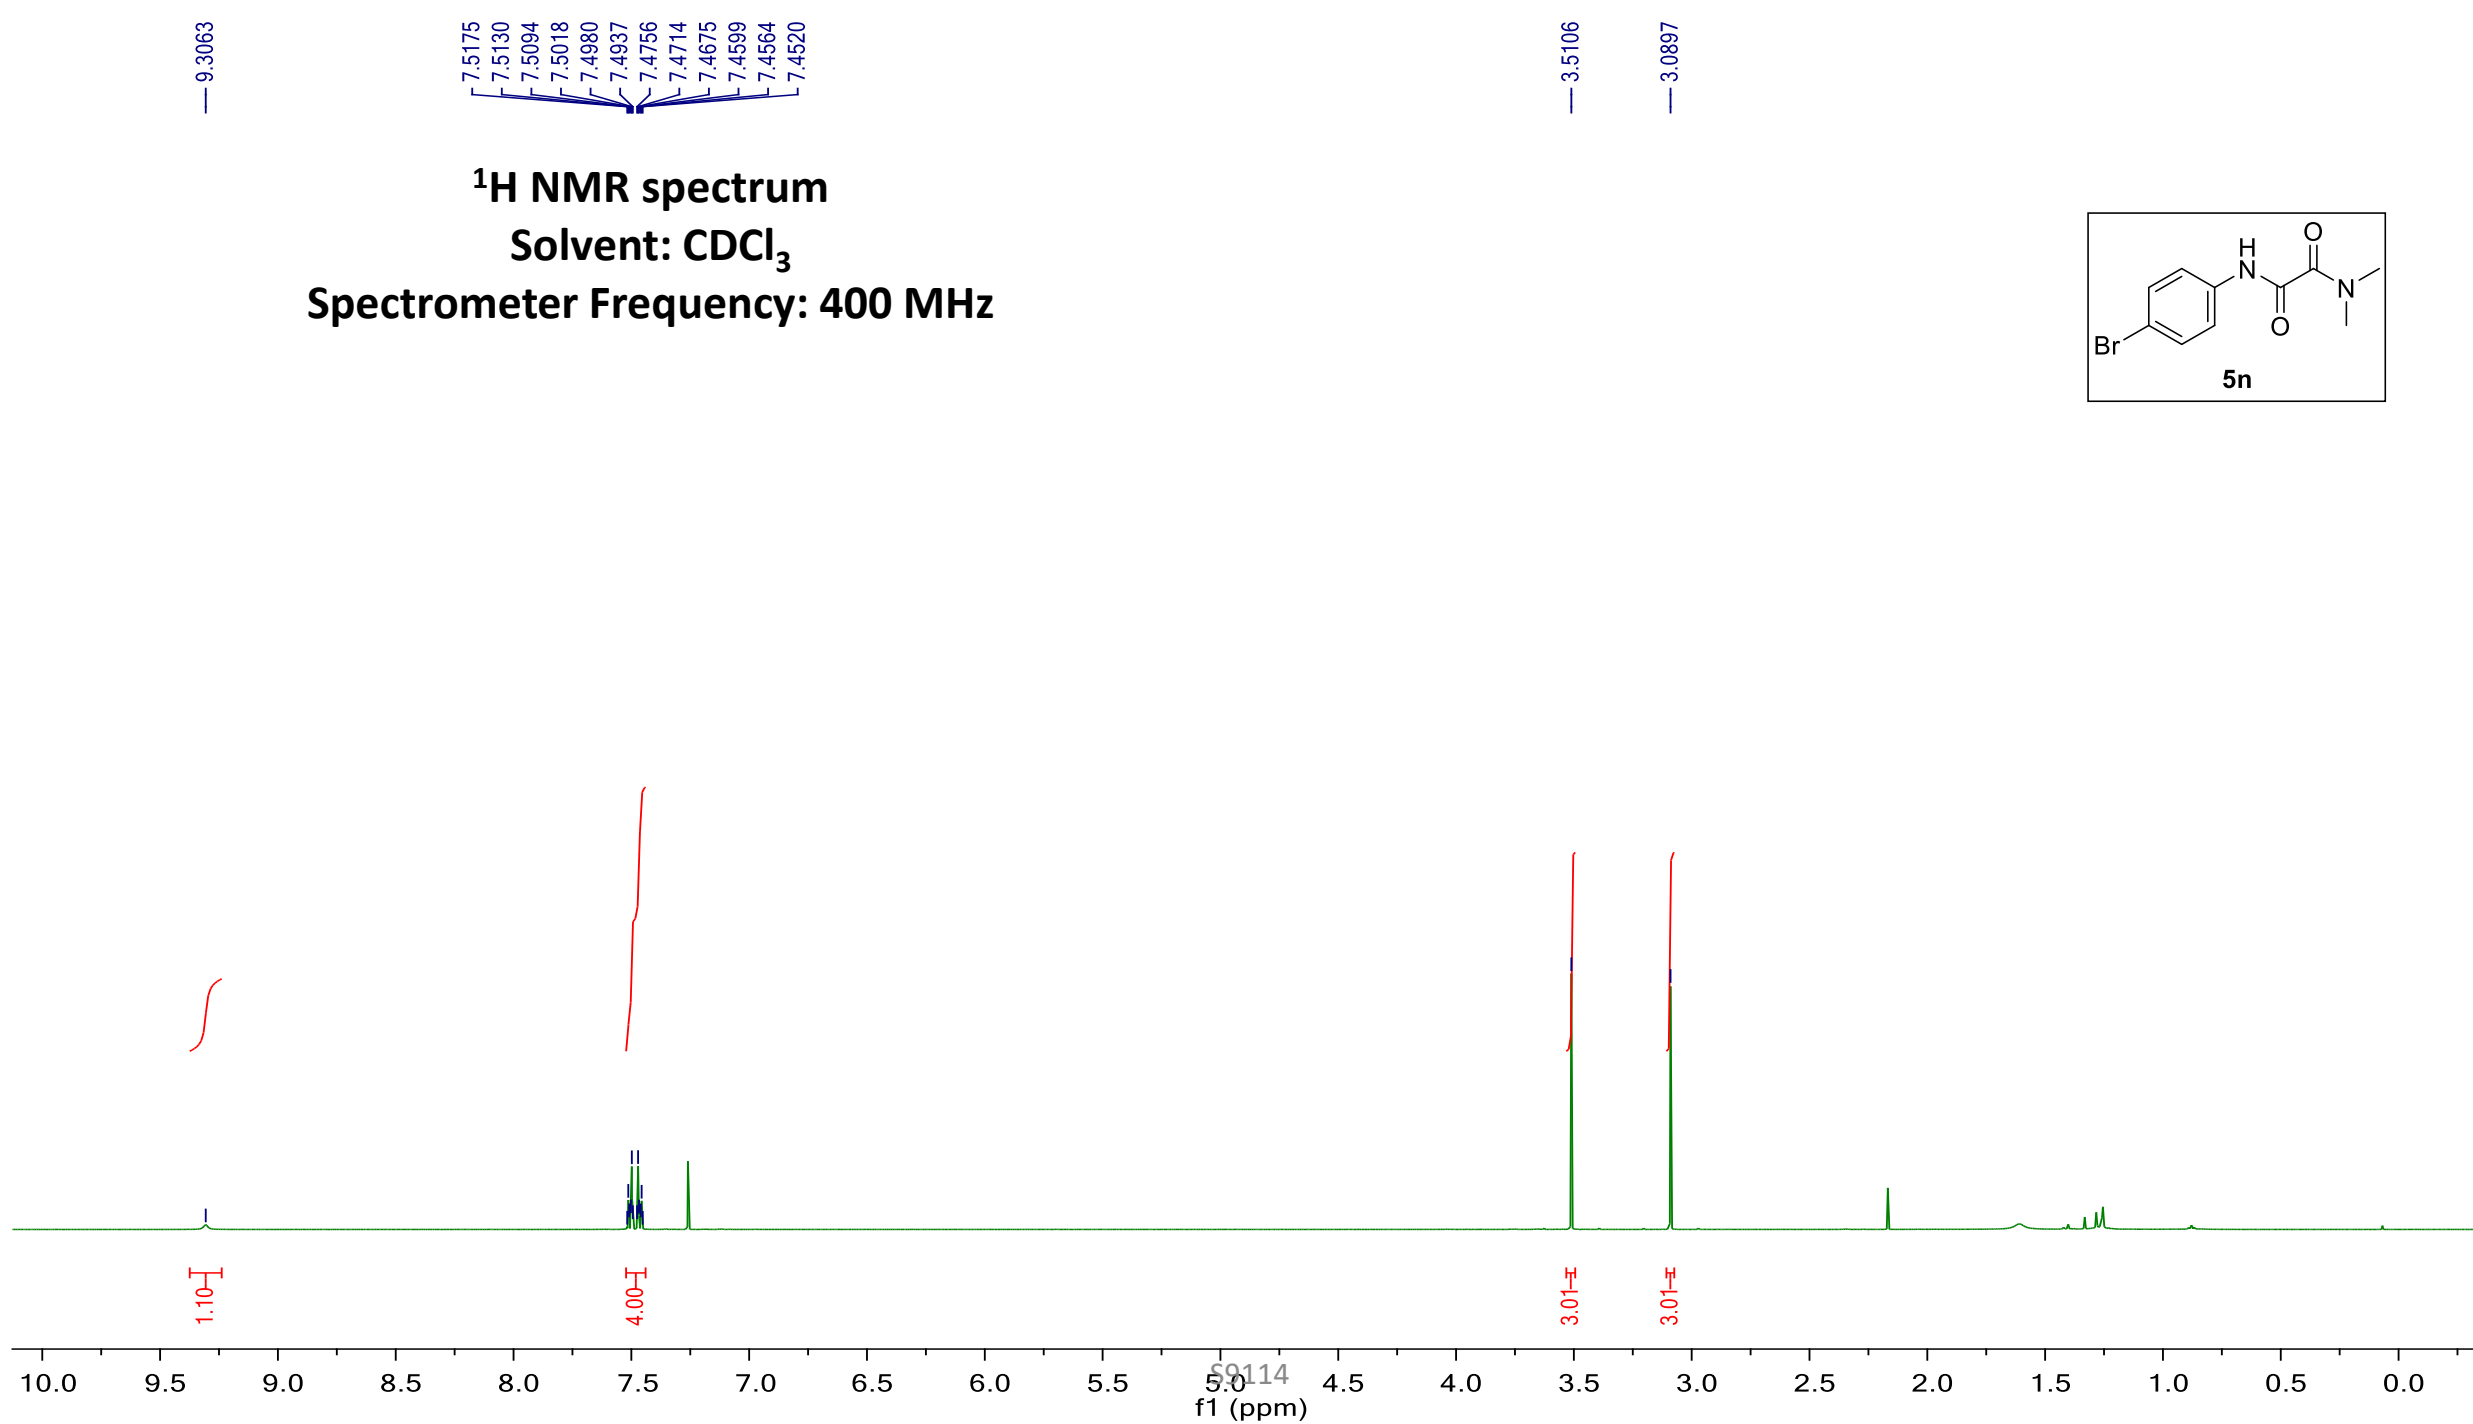

**$^{13}\text{C}$   $\{^1\text{H}\}$  NMR spectrum**  
**Solvent:  $\text{CDCl}_3$**   
**Spectrometer Frequency: 100 MHz**

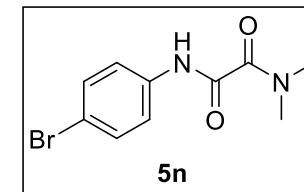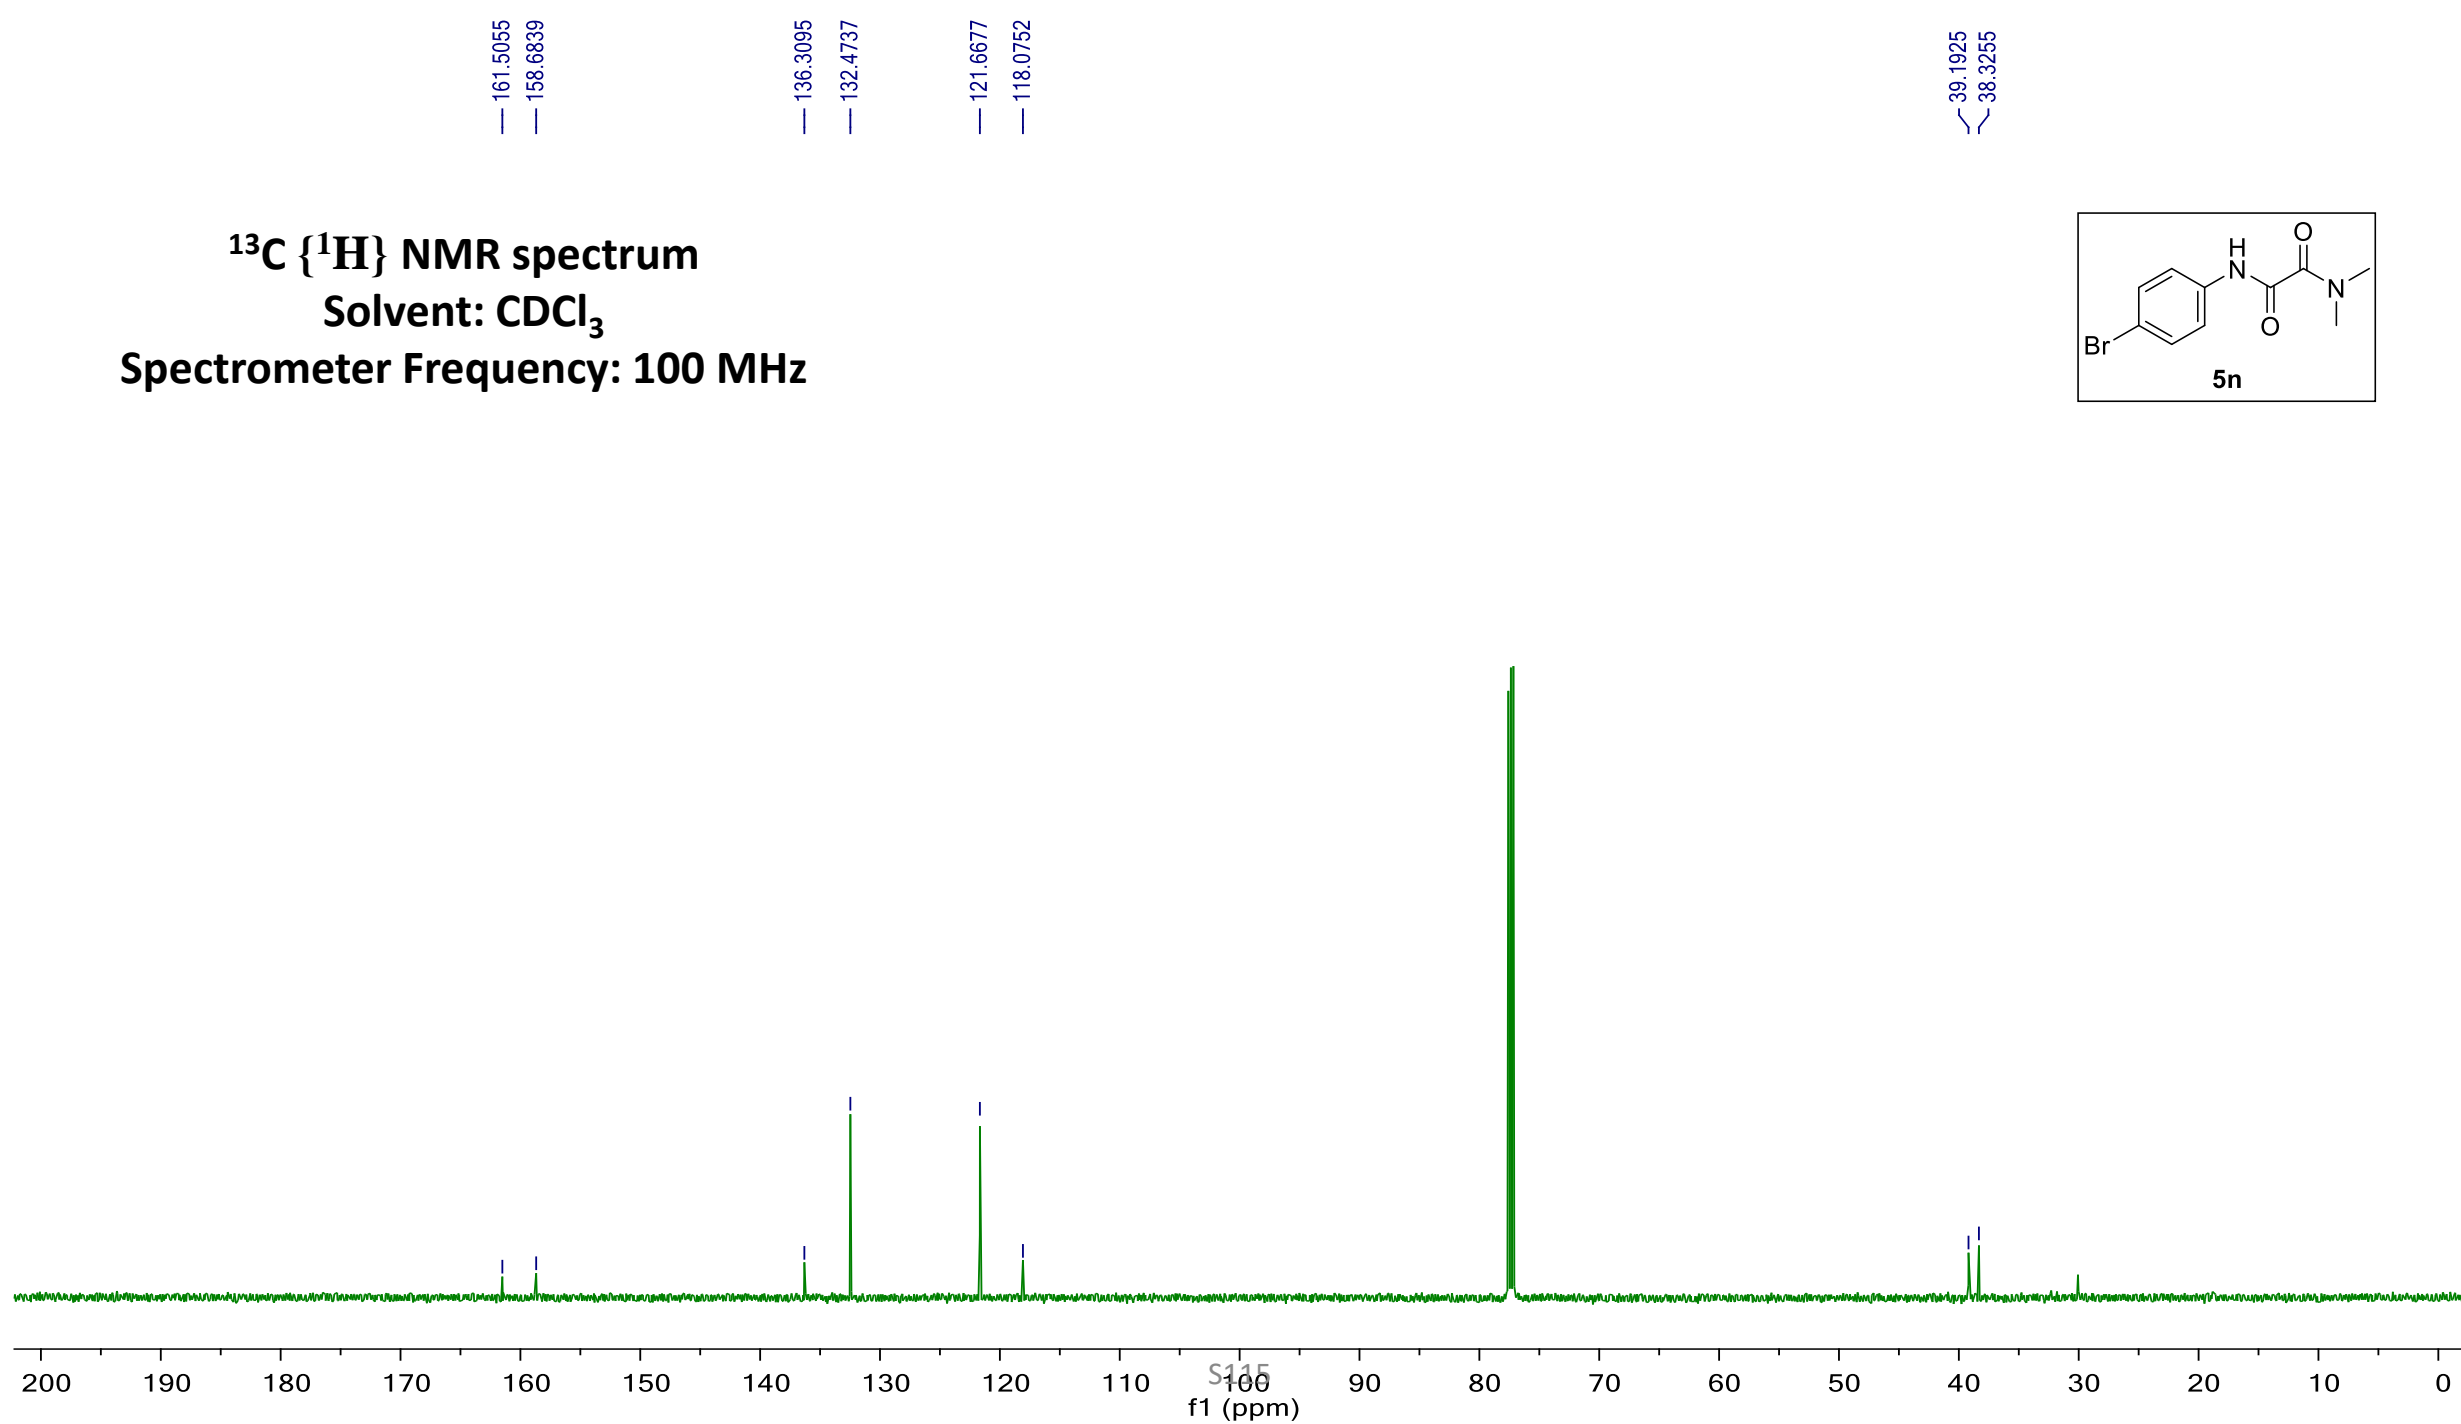

**<sup>1</sup>H NMR spectrum**  
**Solvent: DMSO-*d*<sub>6</sub>**  
**Spectrometer Frequency: 400 MHz**

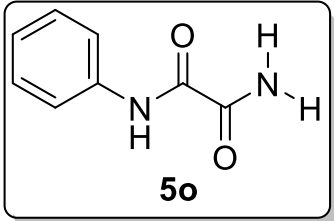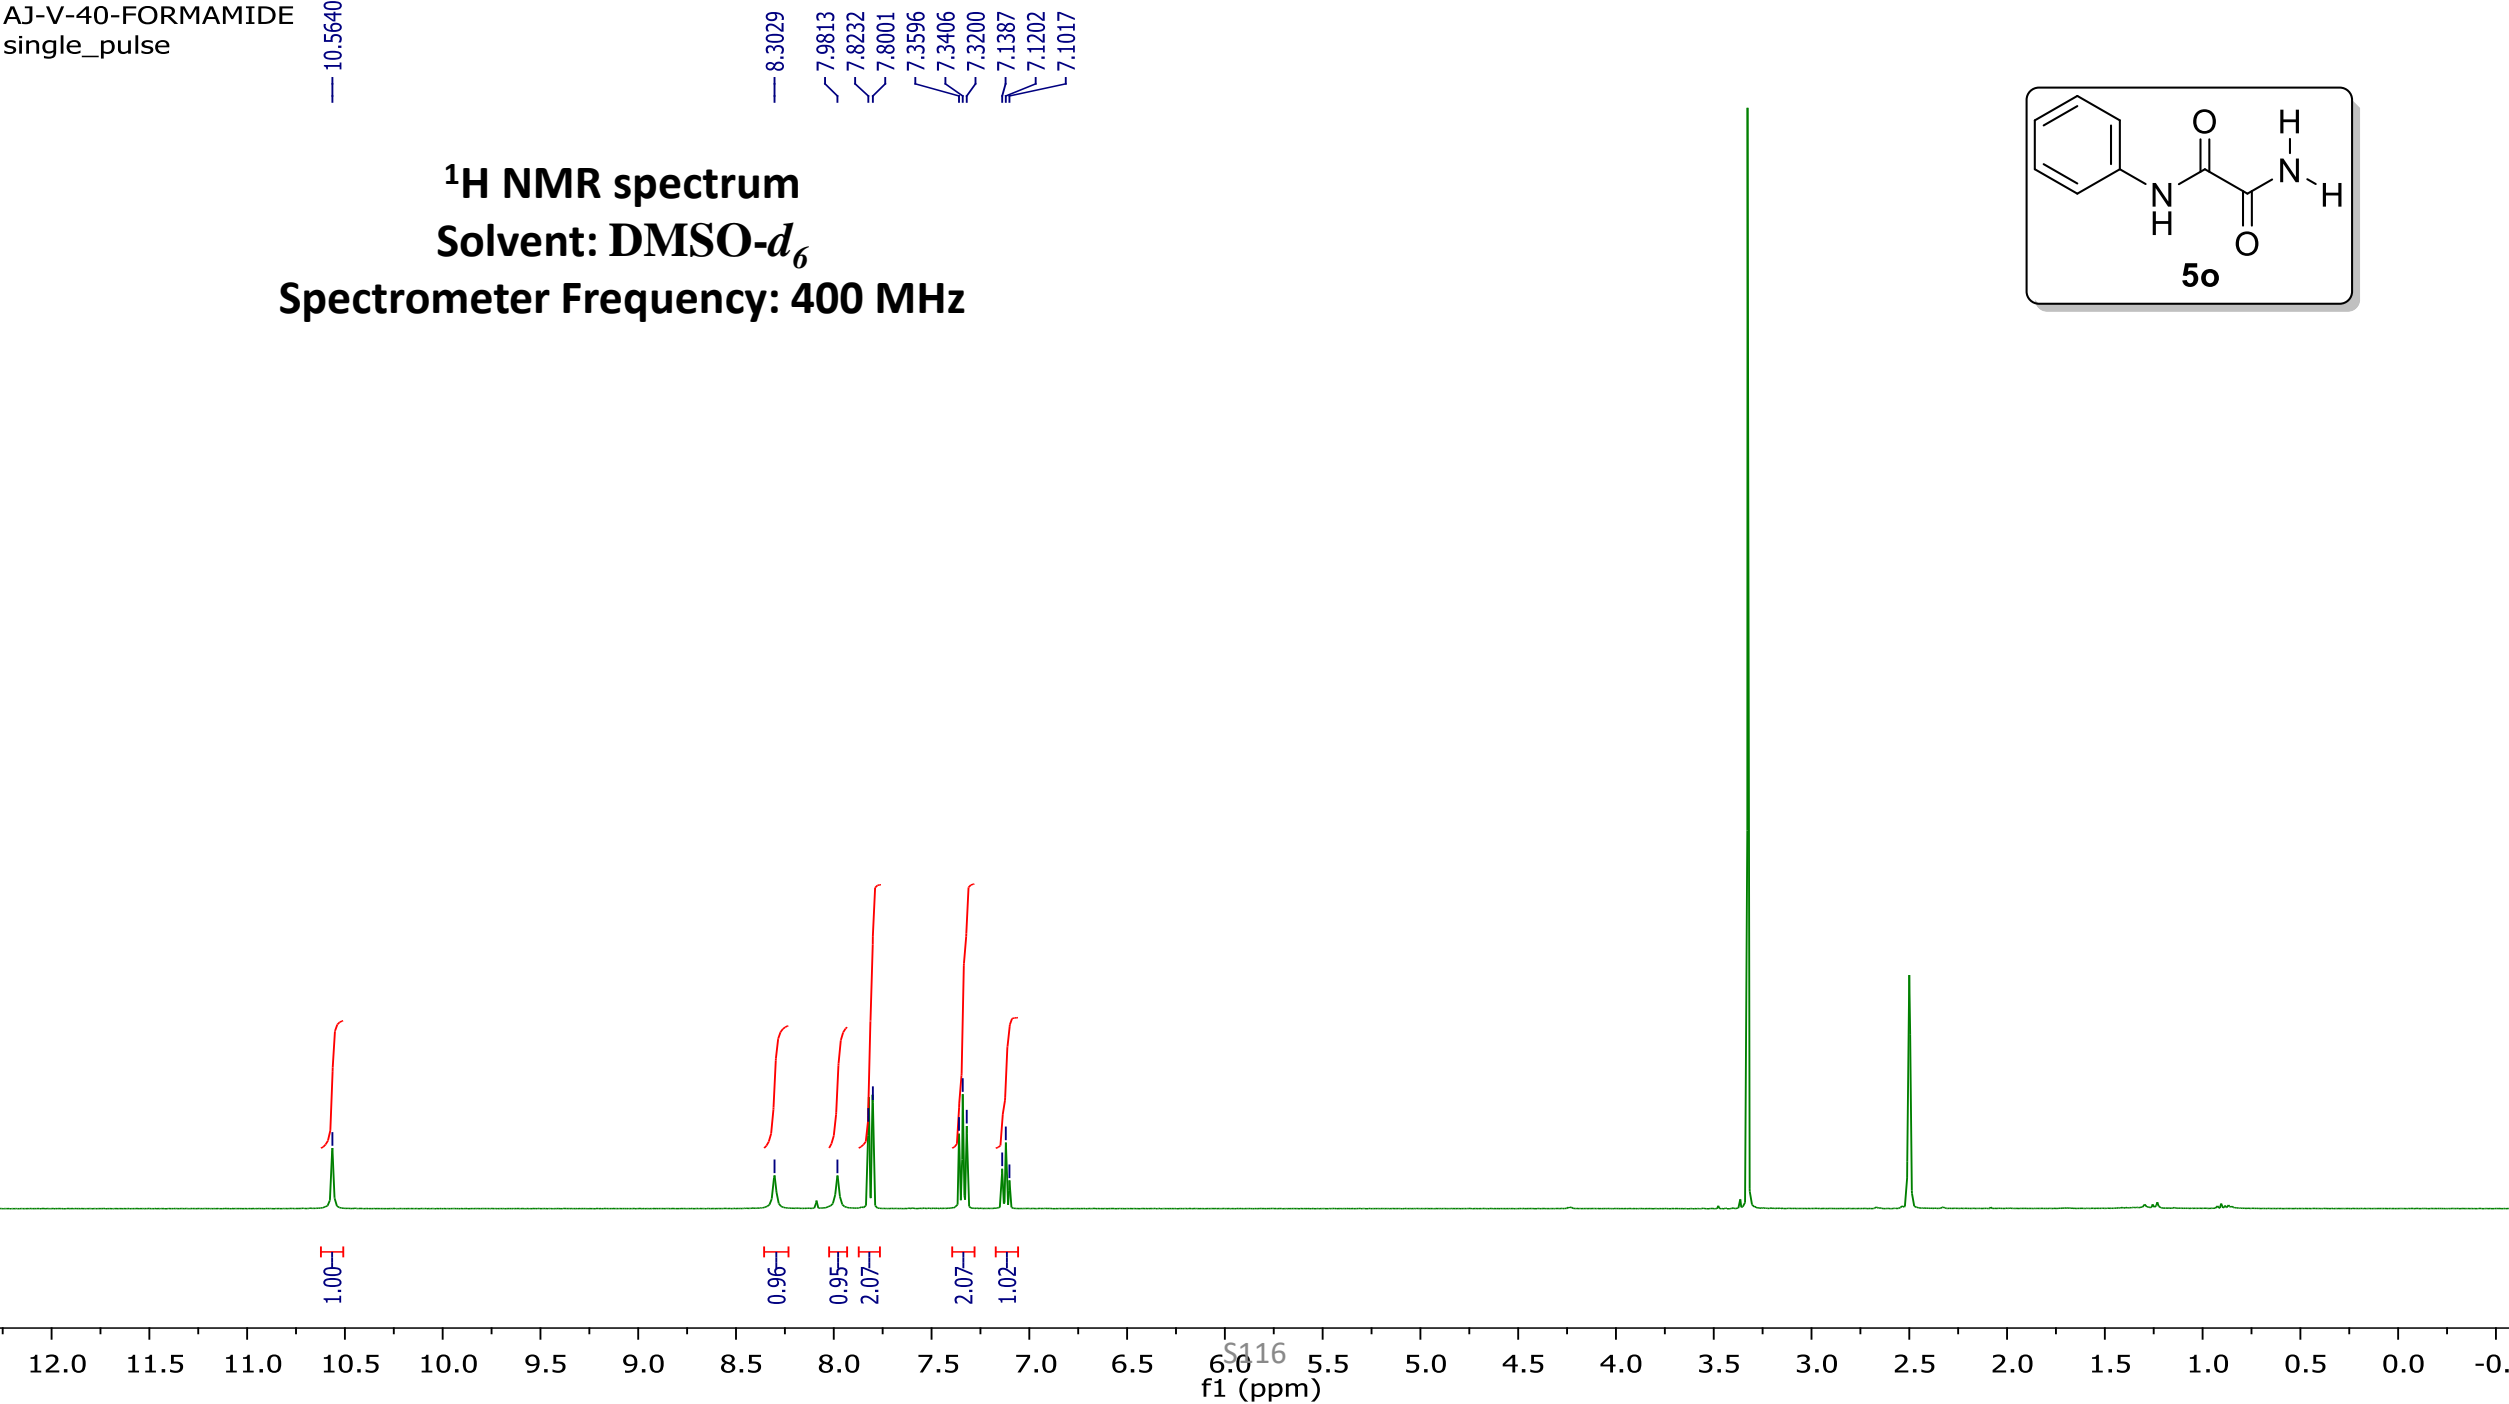

AJ-V-40-FORMAMIDE  
single pulse decoupled gated NOE

**$^{13}\text{C}$   $\{^1\text{H}\}$  NMR spectrum**  
**Solvent:  $\text{DMSO-}d_6$**   
**Spectrometer Frequency: 100 MHz**

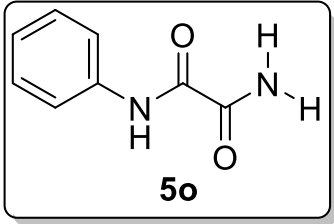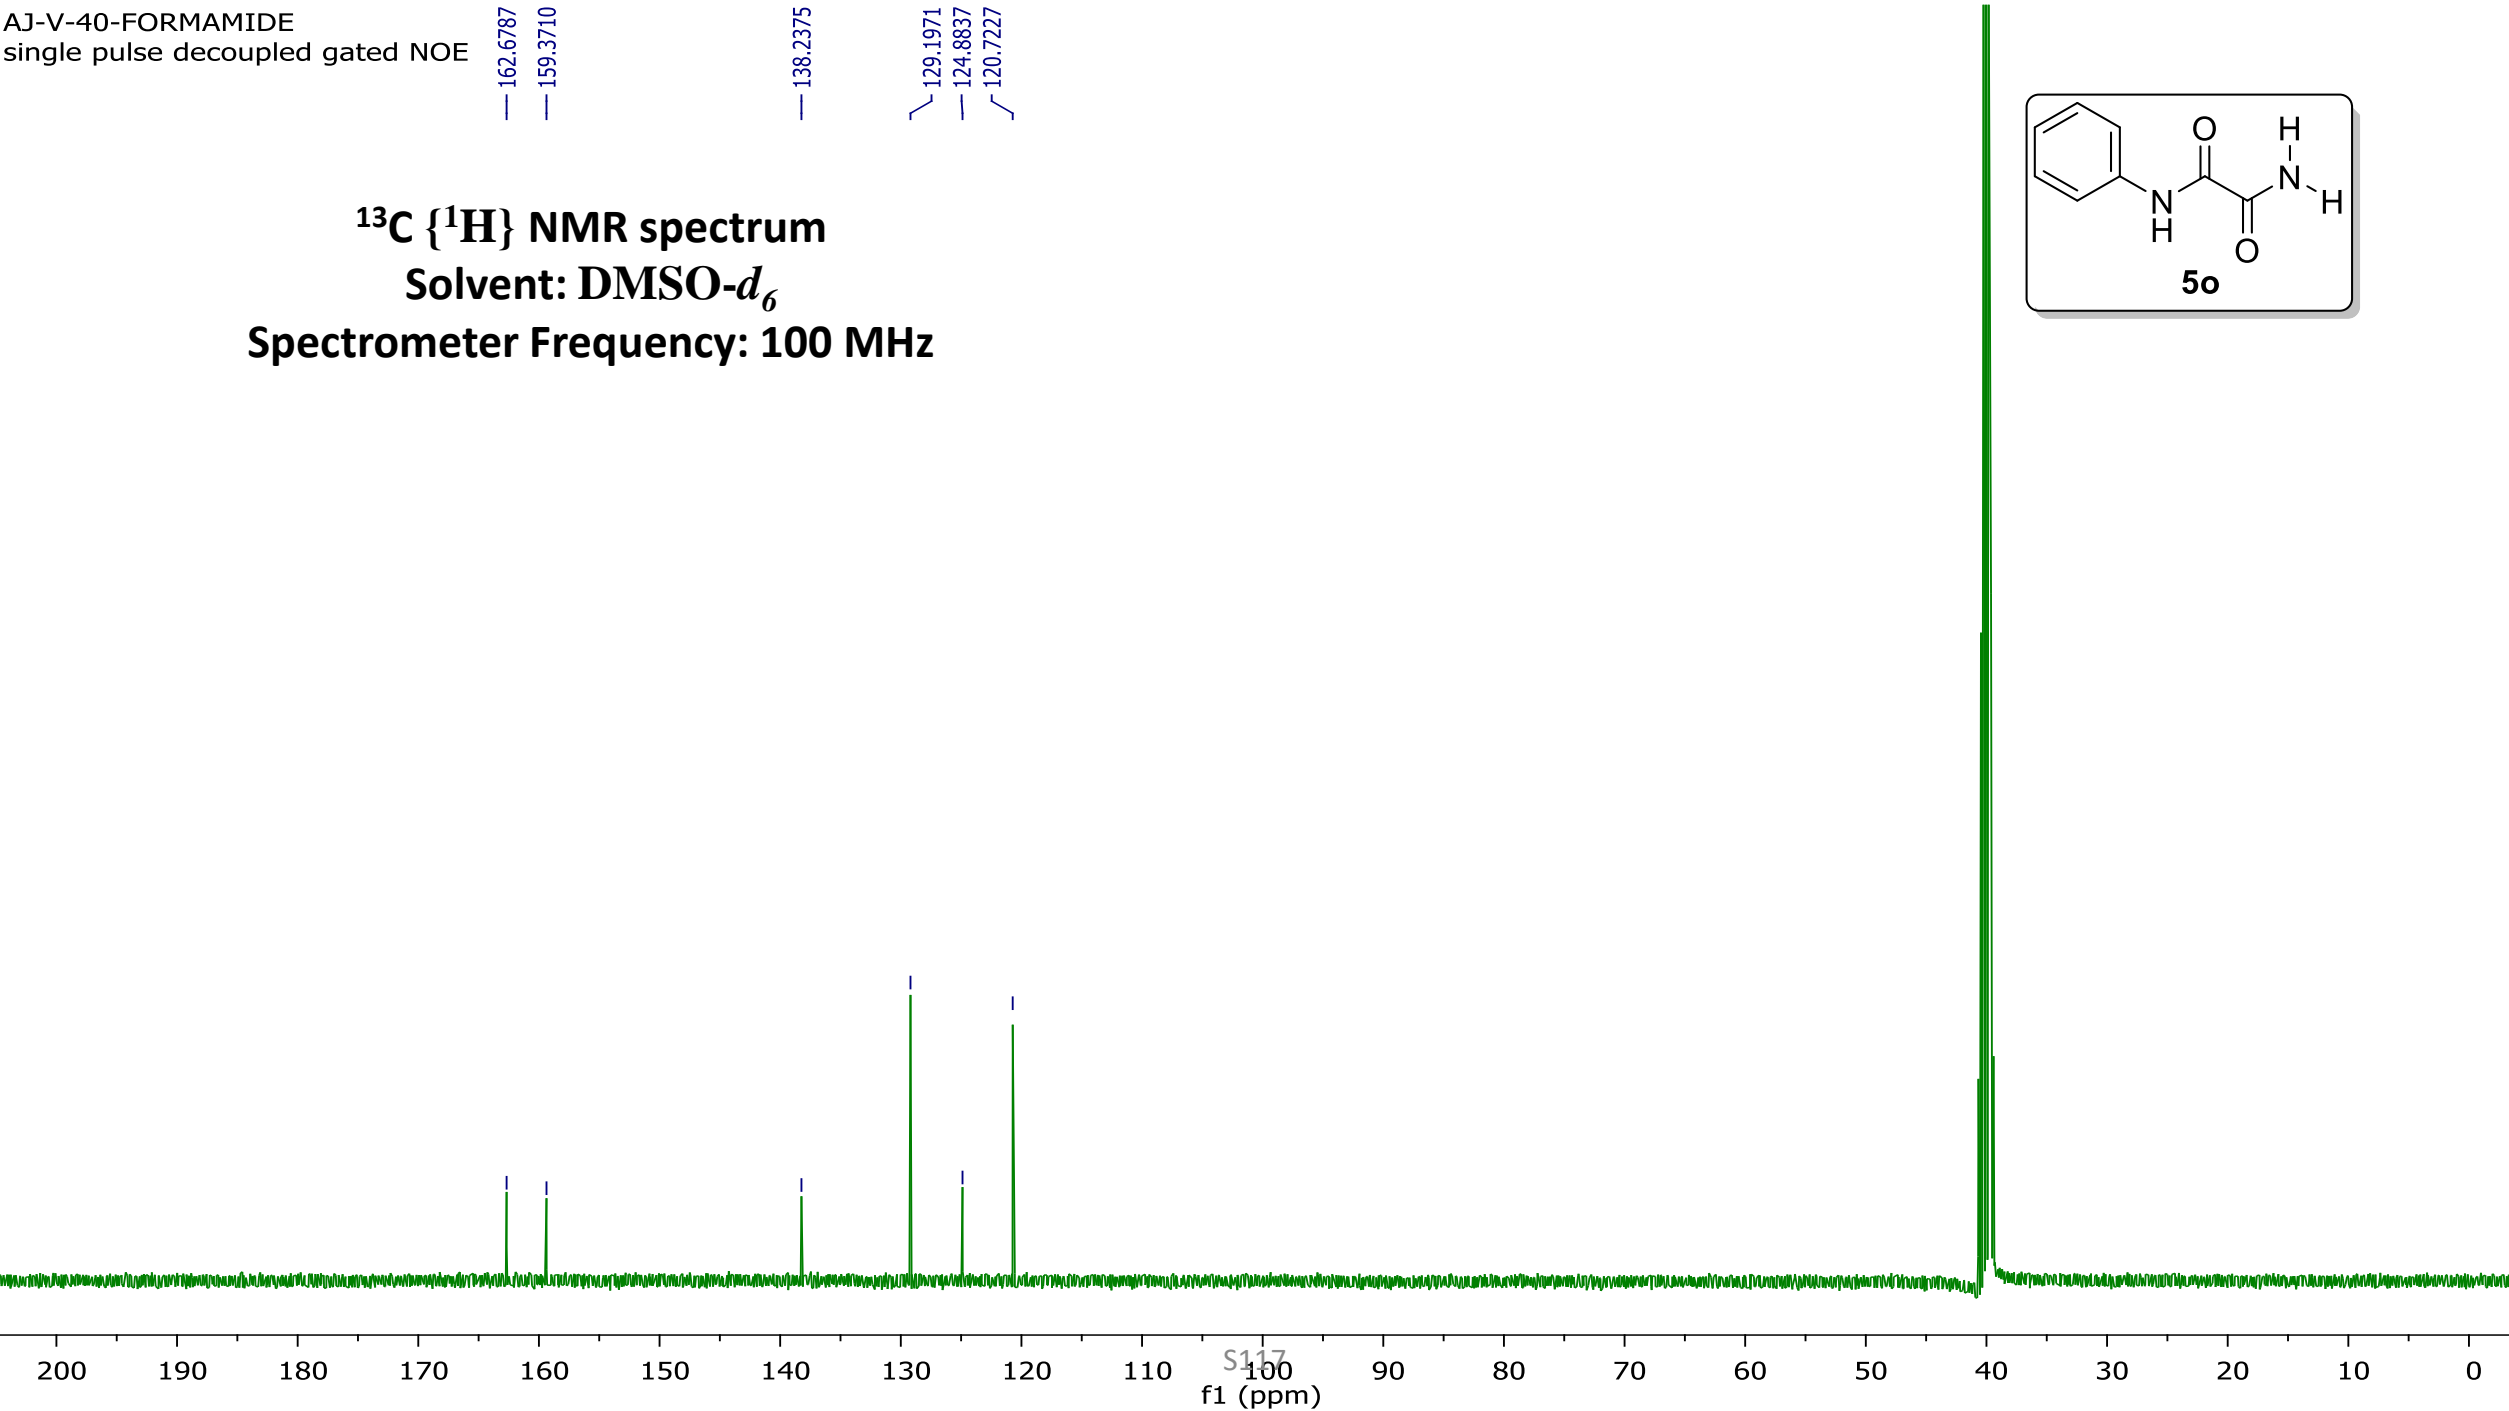

**$^1\text{H}$  NMR spectrum**  
**Solvent:  $\text{CDCl}_3$**   
**Spectrometer Frequency: 400 MHz**

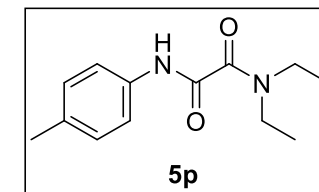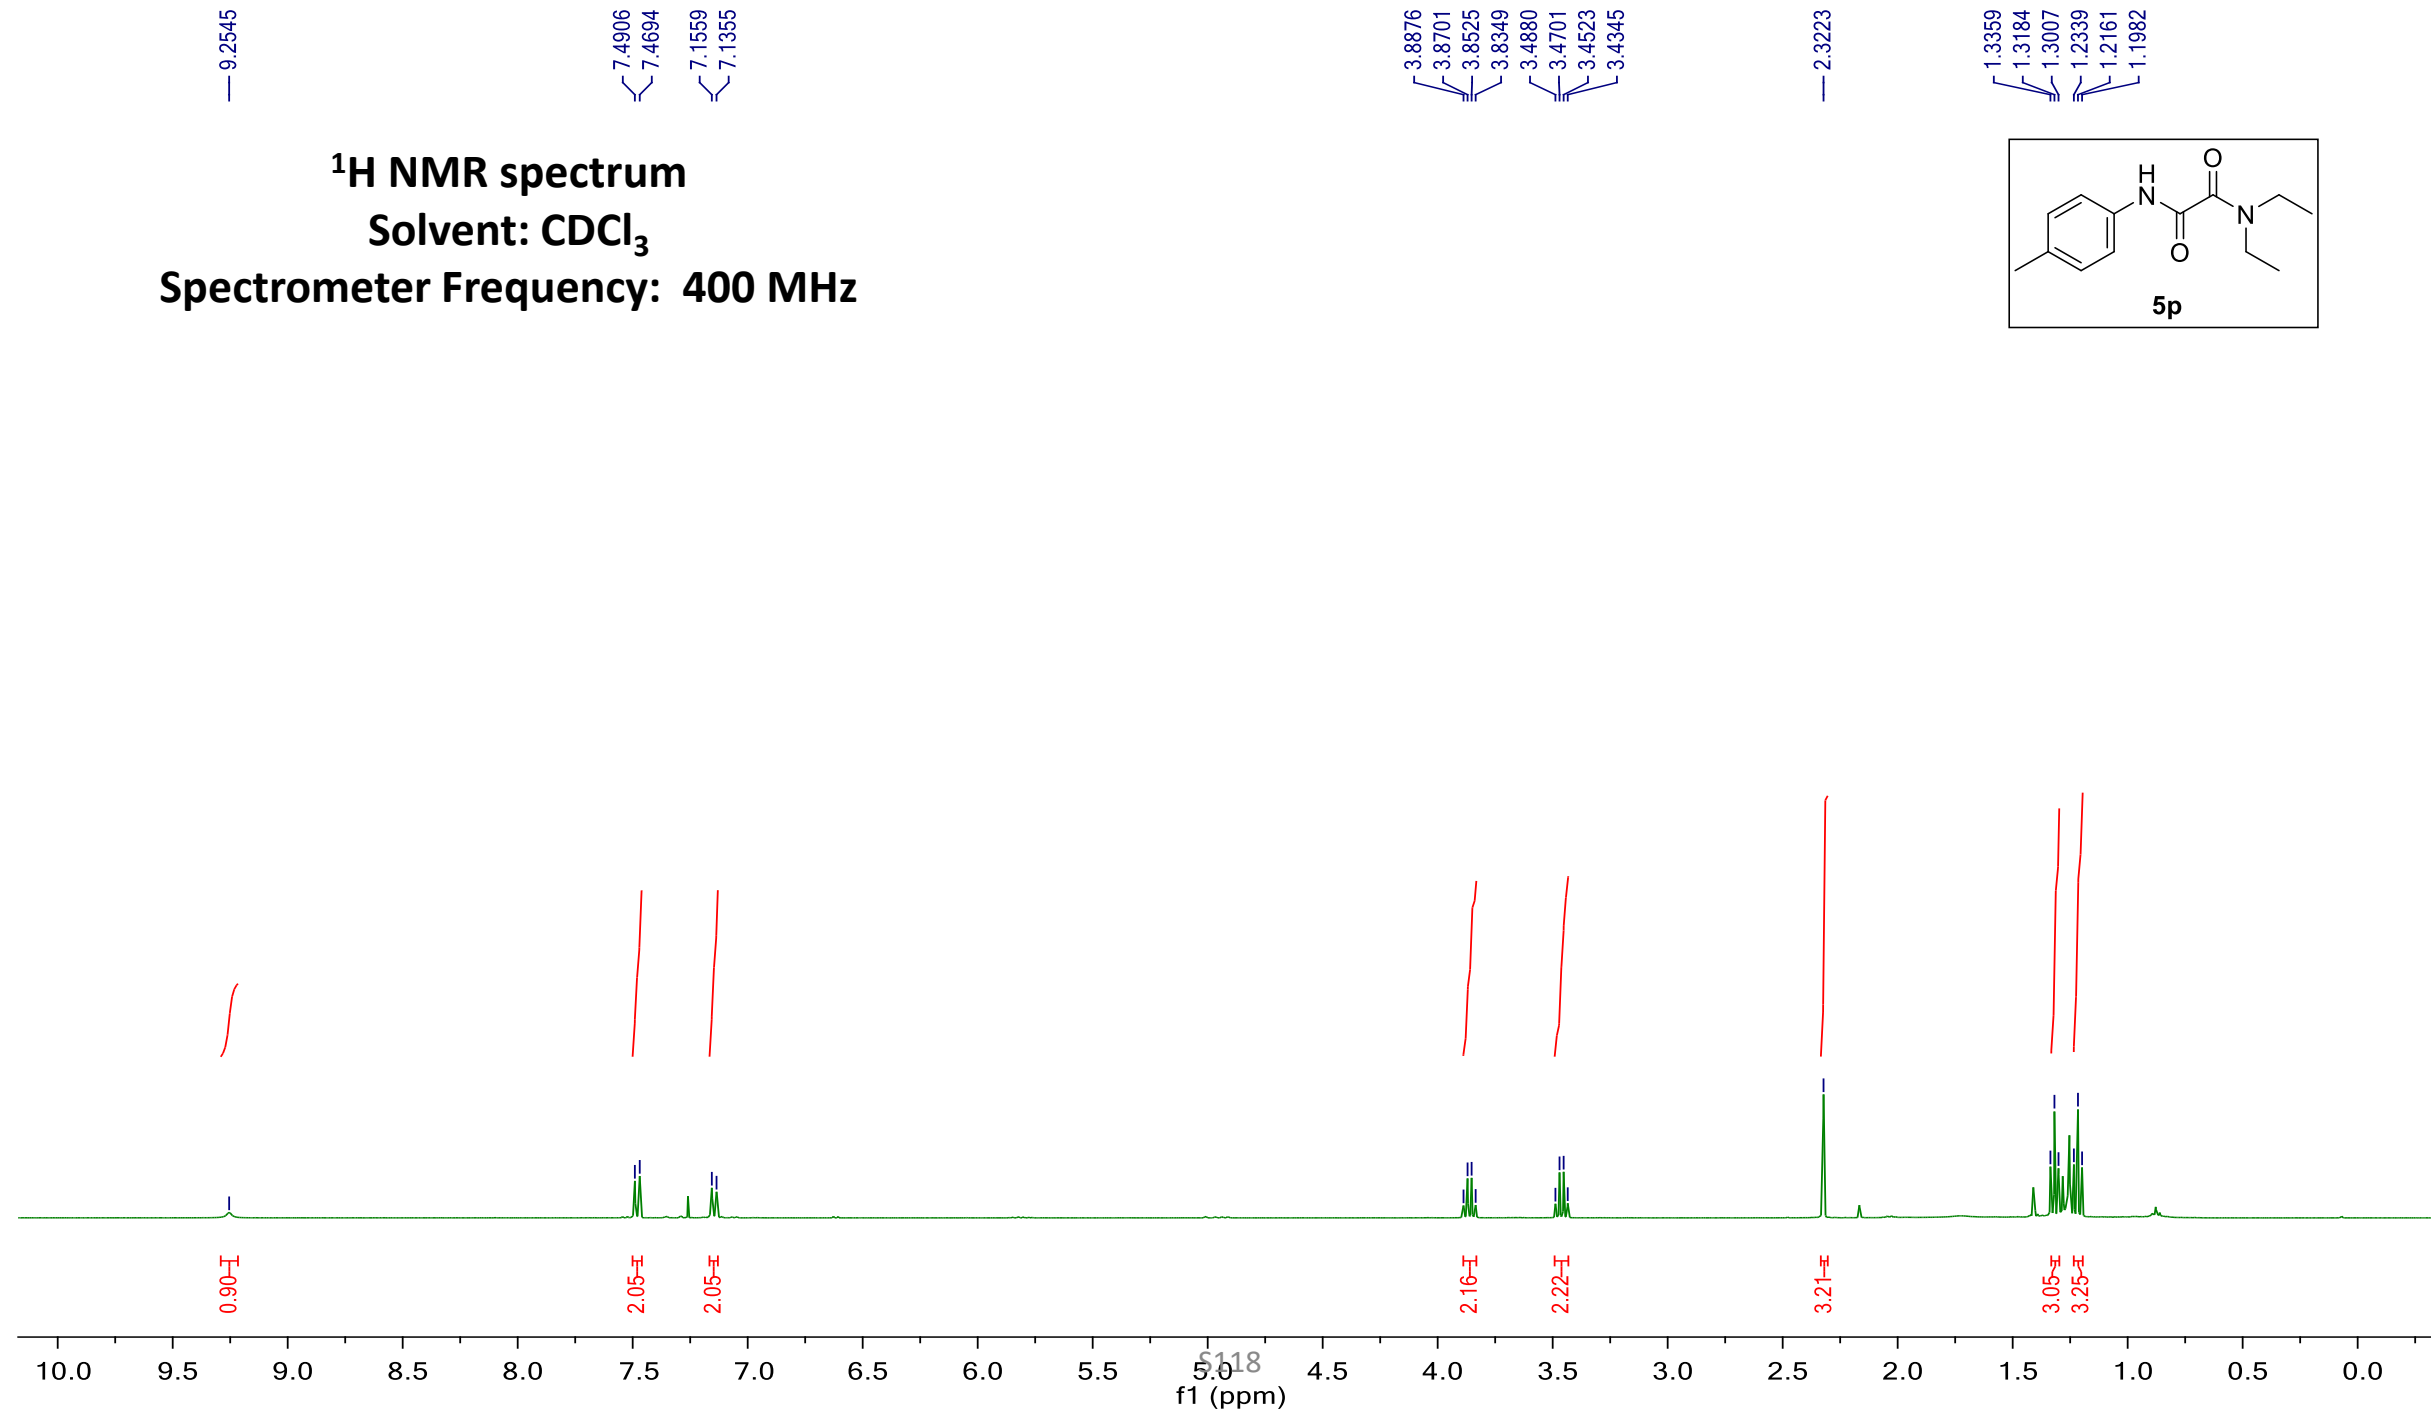

**$^{13}\text{C}$   $\{^1\text{H}\}$  NMR spectrum**  
**Solvent:  $\text{CDCl}_3$**   
**Spectrometer Frequency: 100 MHz**

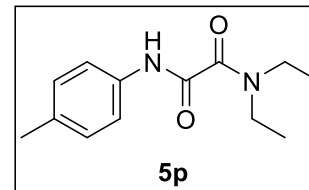

— 161.7034  
— 158.9925

— 135.1920  
— 134.9866  
— 130.1488

— 120.3915

— 44.3103  
— 43.5057

— 21.5125

— 15.3927  
— 13.0278

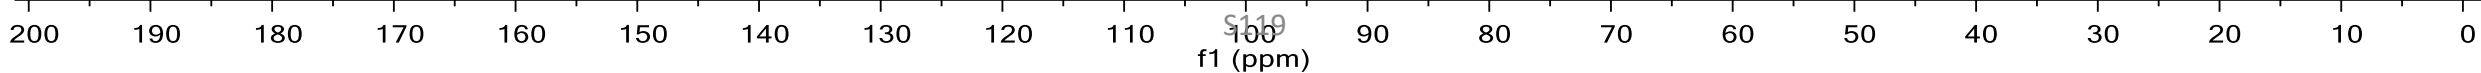

**$^1\text{H}$  NMR spectrum**  
**Solvent:  $\text{DMSO-}d_6$**   
**Spectrometer Frequency: 400 MHz**

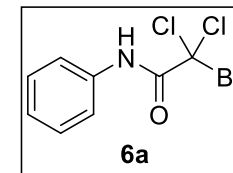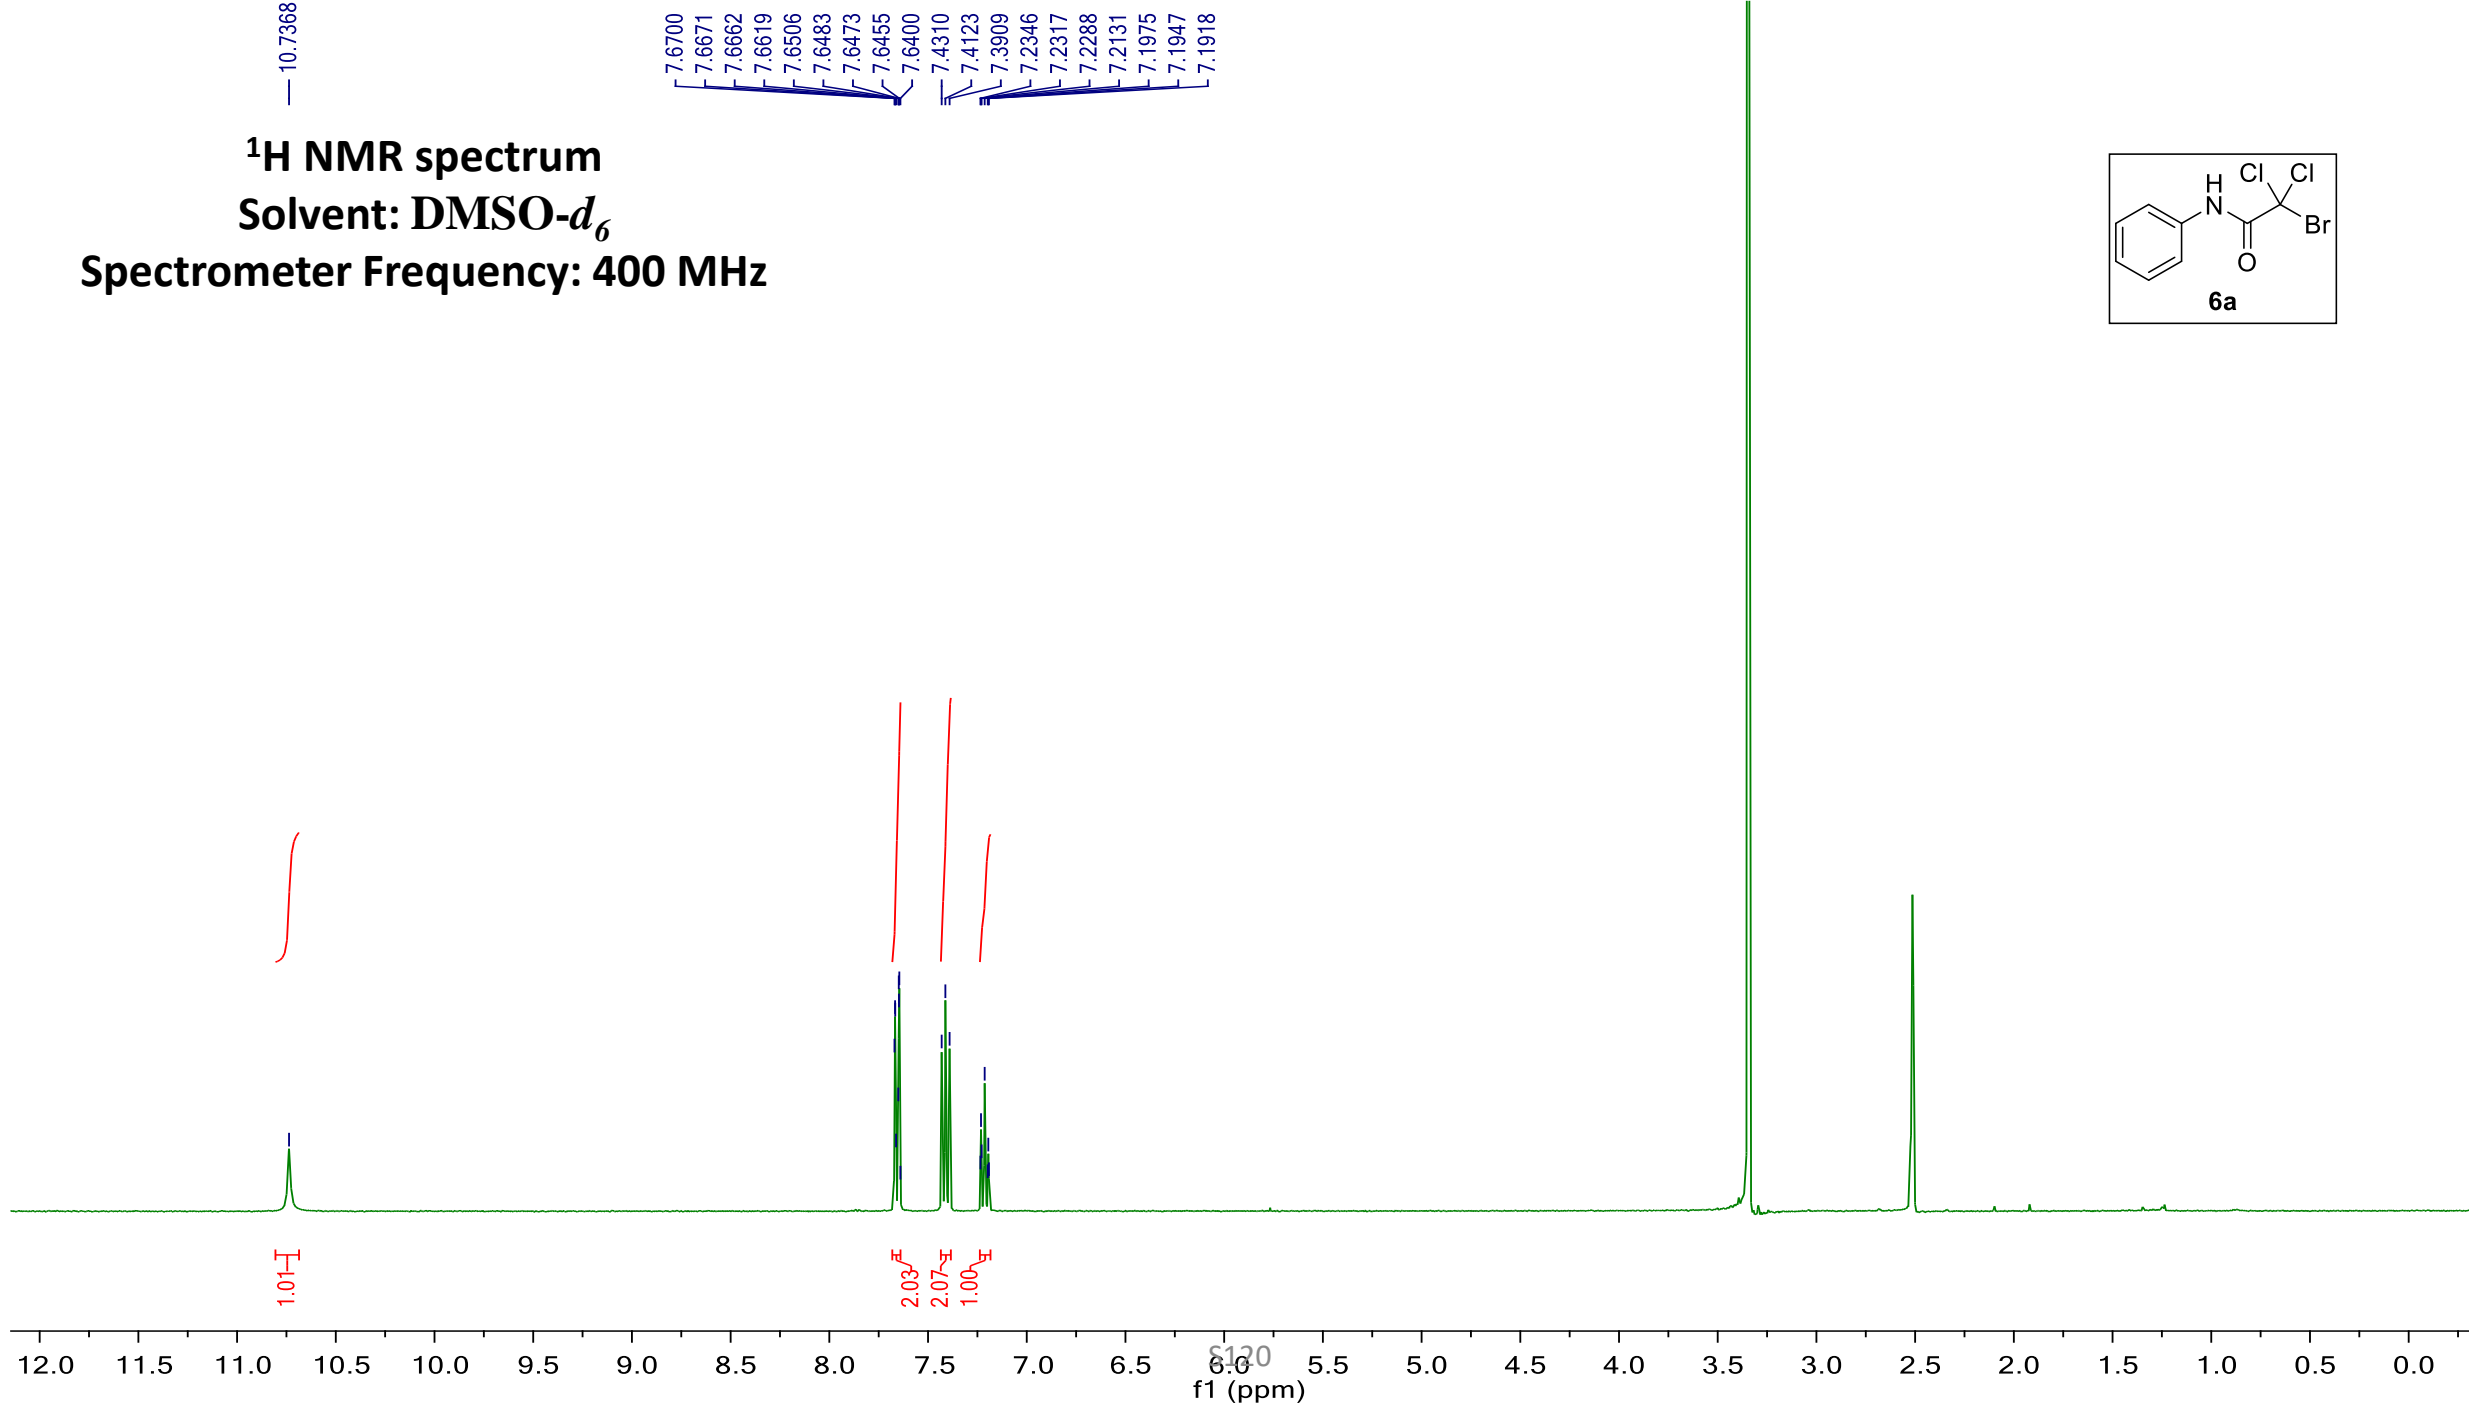

**$^{13}\text{C}$  { $^1\text{H}$ } NMR spectrum**  
**Solvent:  $\text{CDCl}_3$**   
**Spectrometer Frequency: 100 MHz**

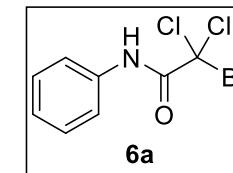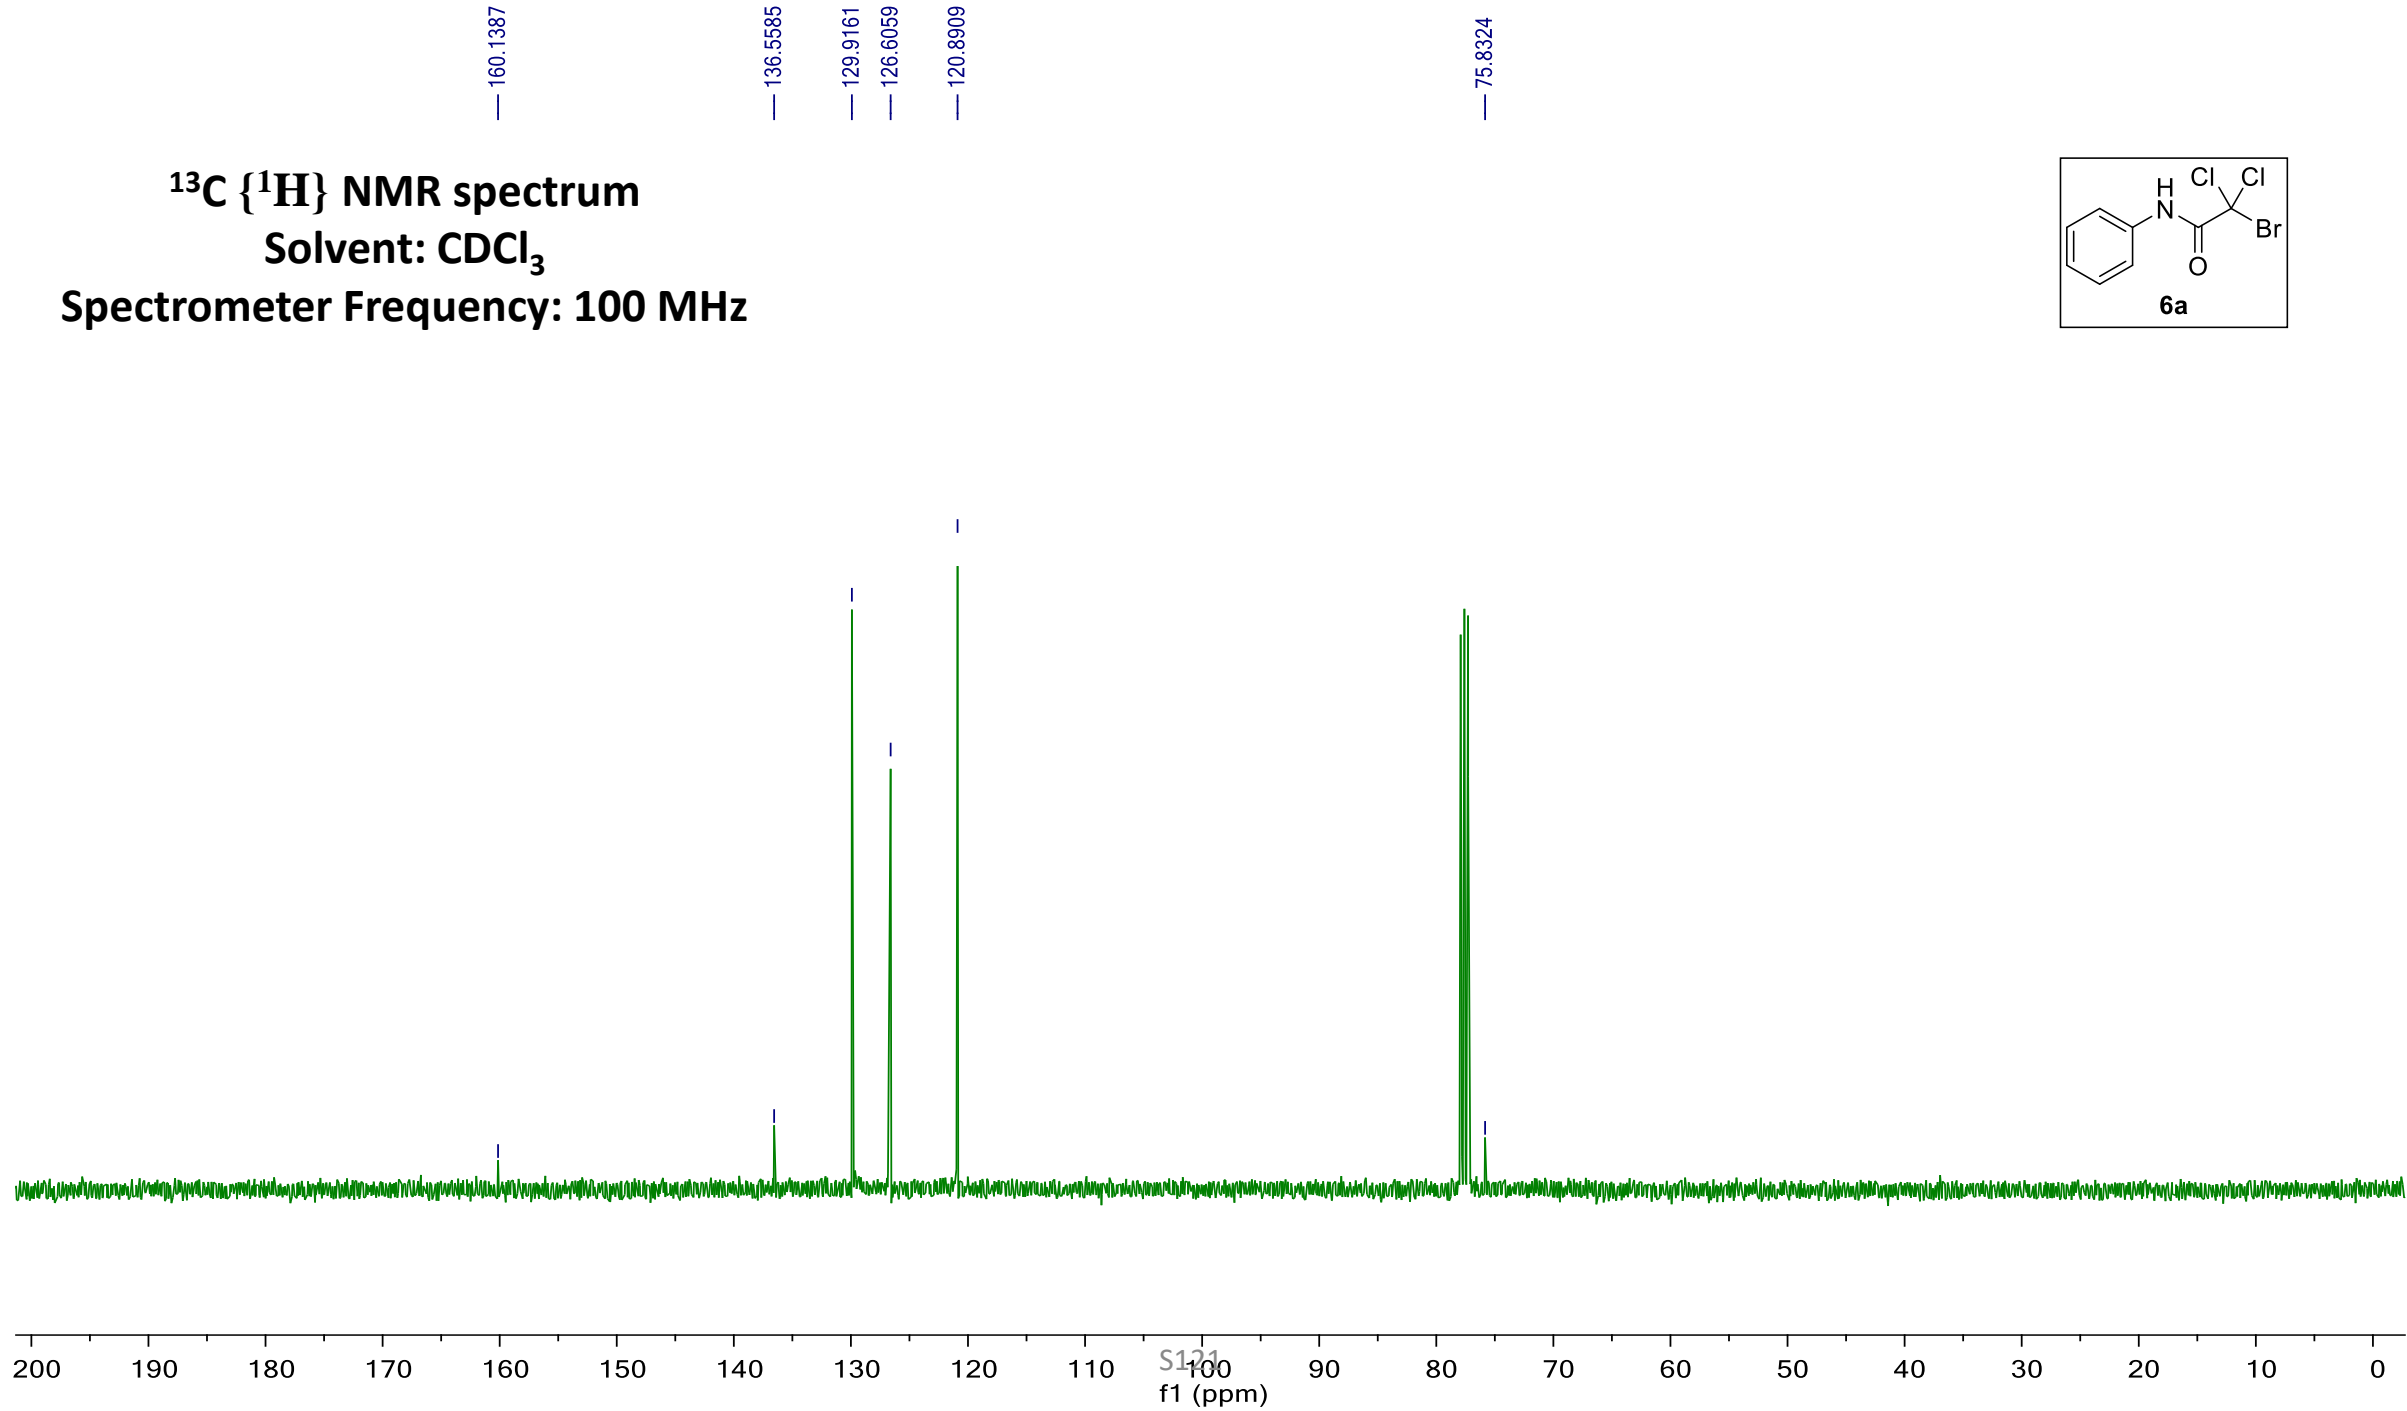

**$^1\text{H}$  NMR spectrum**  
**Solvent:  $\text{CDCl}_3$**   
**Spectrometer Frequency: 400 MHz**

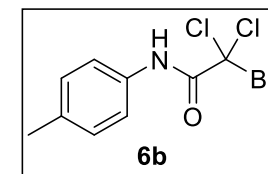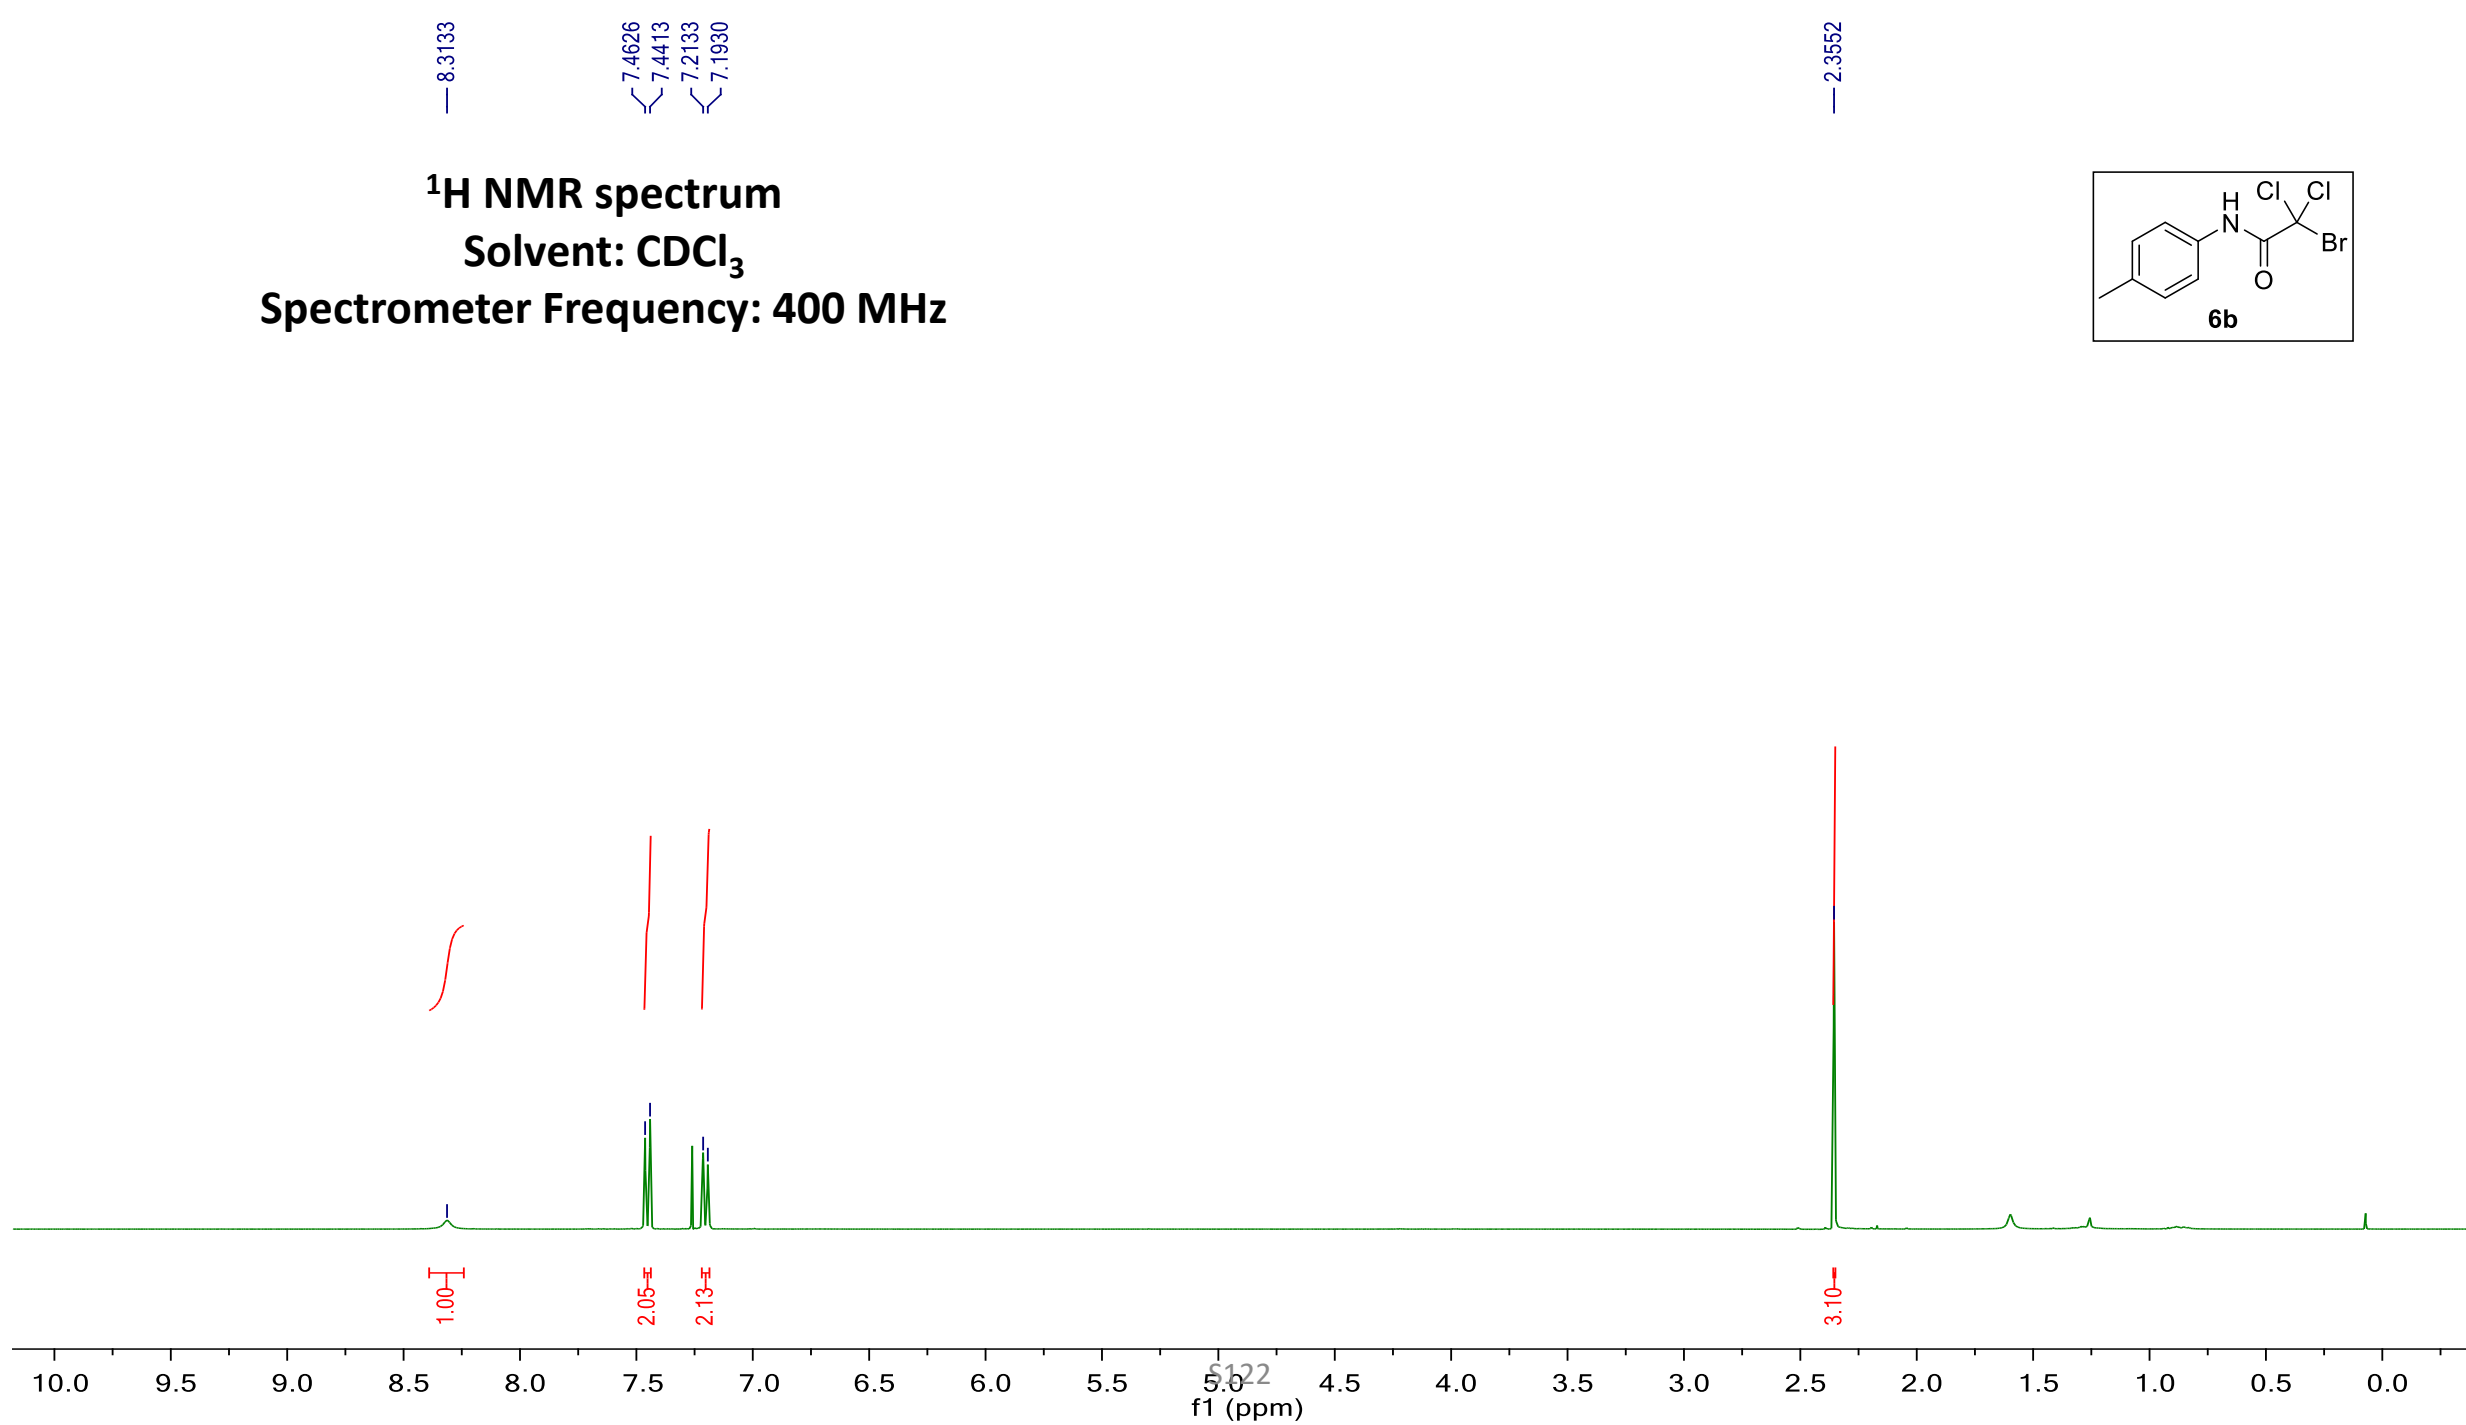

**$^{13}\text{C}$  { $^1\text{H}$ } NMR spectrum**  
**Solvent:  $\text{CDCl}_3$**   
**Spectrometer Frequency: 100 MHz**

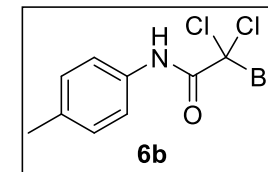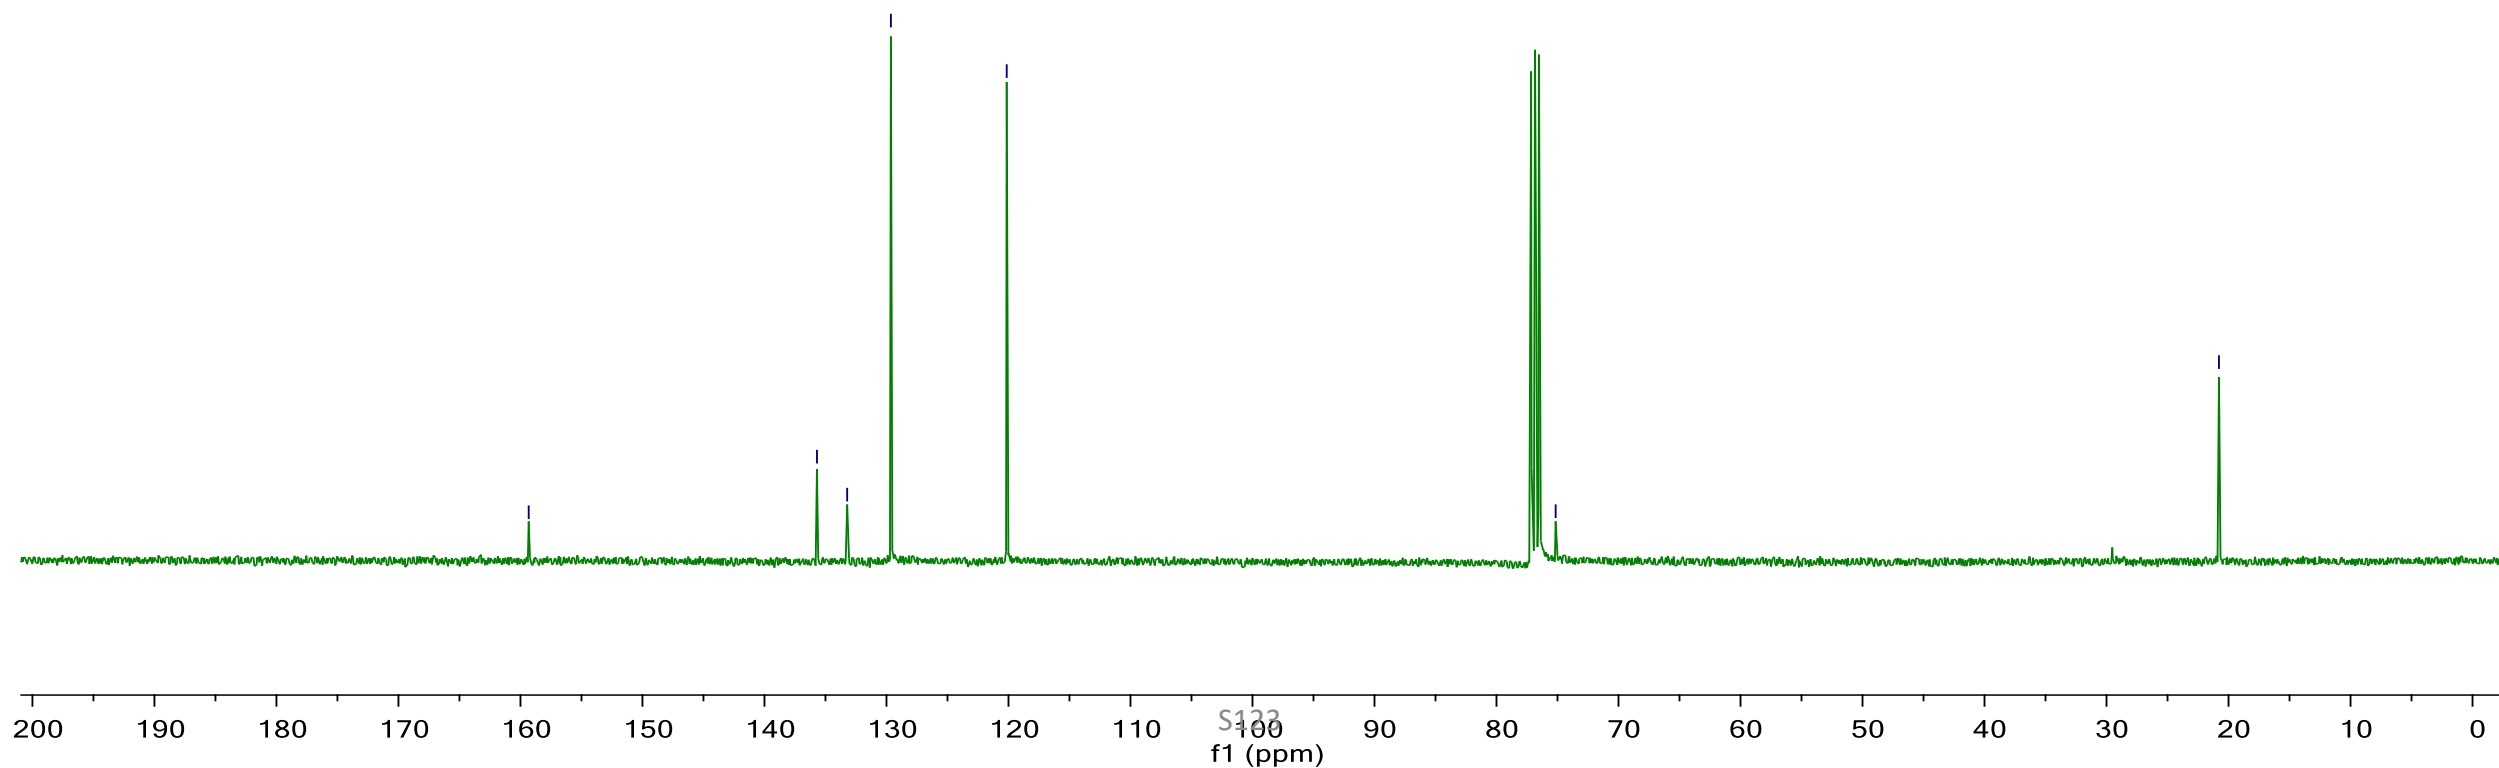

<sup>1</sup>H NMR spectrum

Solvent: CDCl<sub>3</sub>

Spectrometer Frequency: 400 MHz

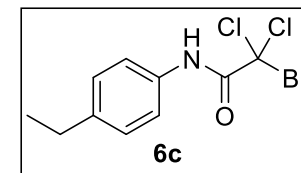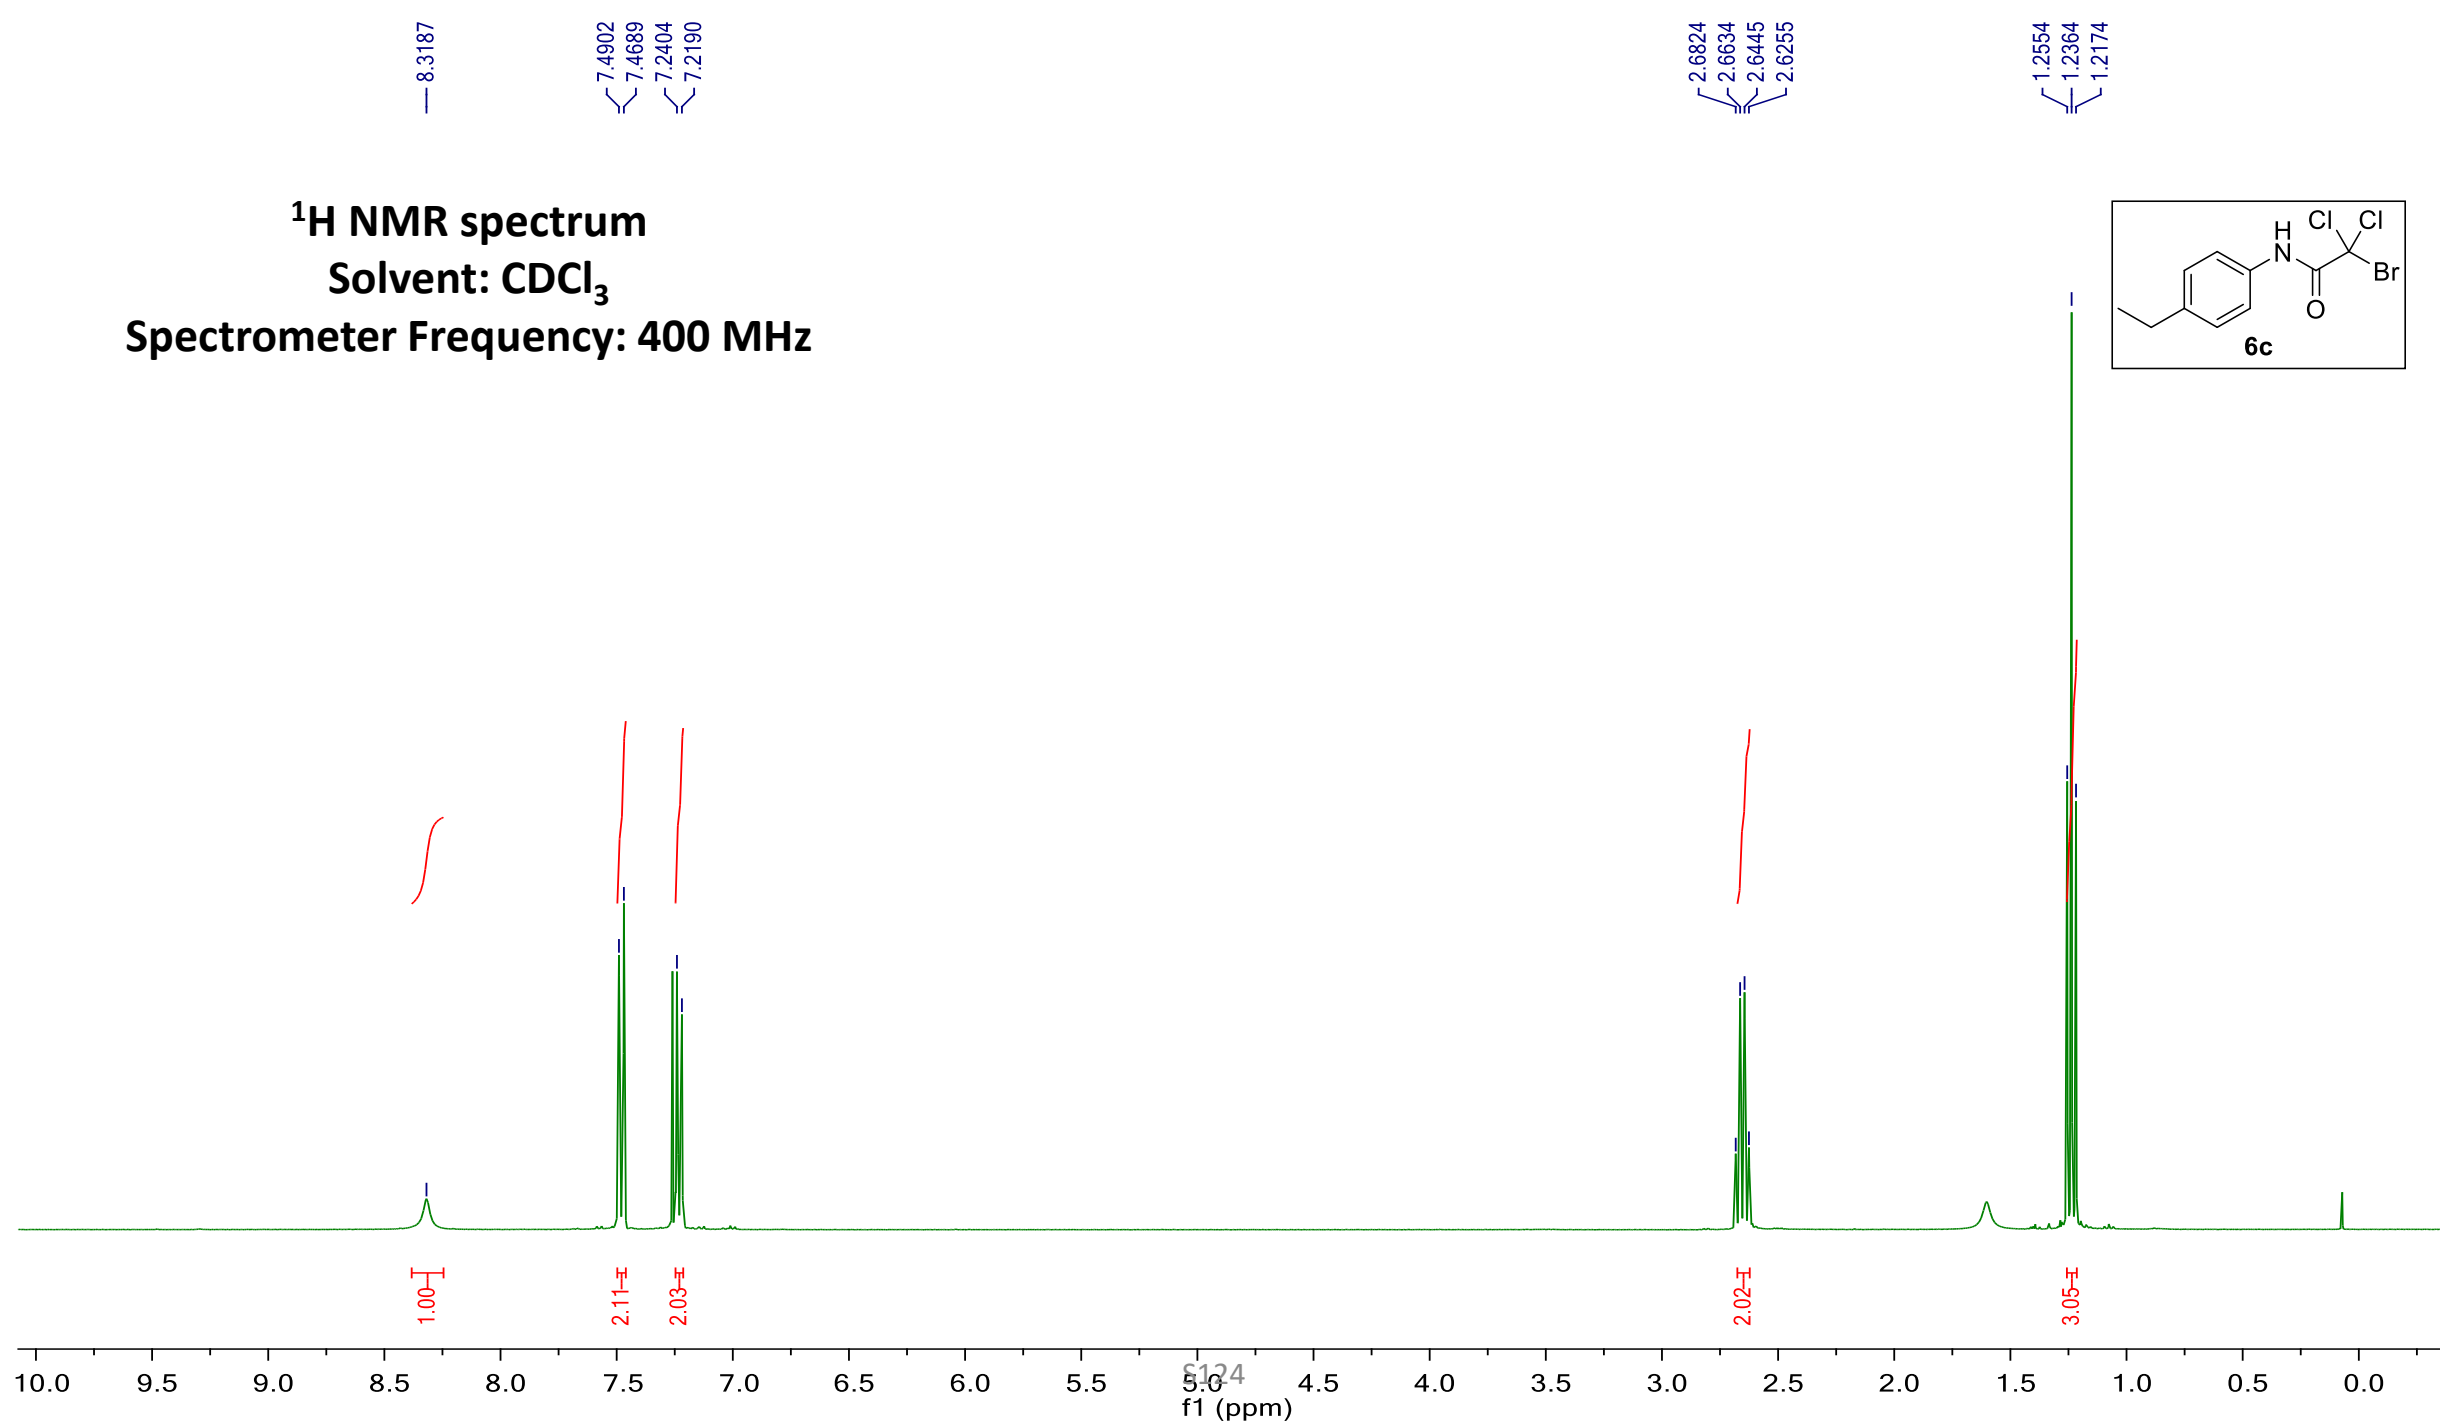

**$^{13}\text{C}$   $\{^1\text{H}\}$  NMR spectrum**  
**Solvent:  $\text{CDCl}_3$**   
**Spectrometer Frequency: 100 MHz**

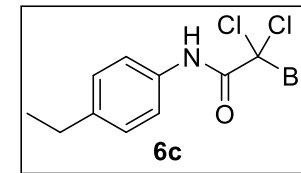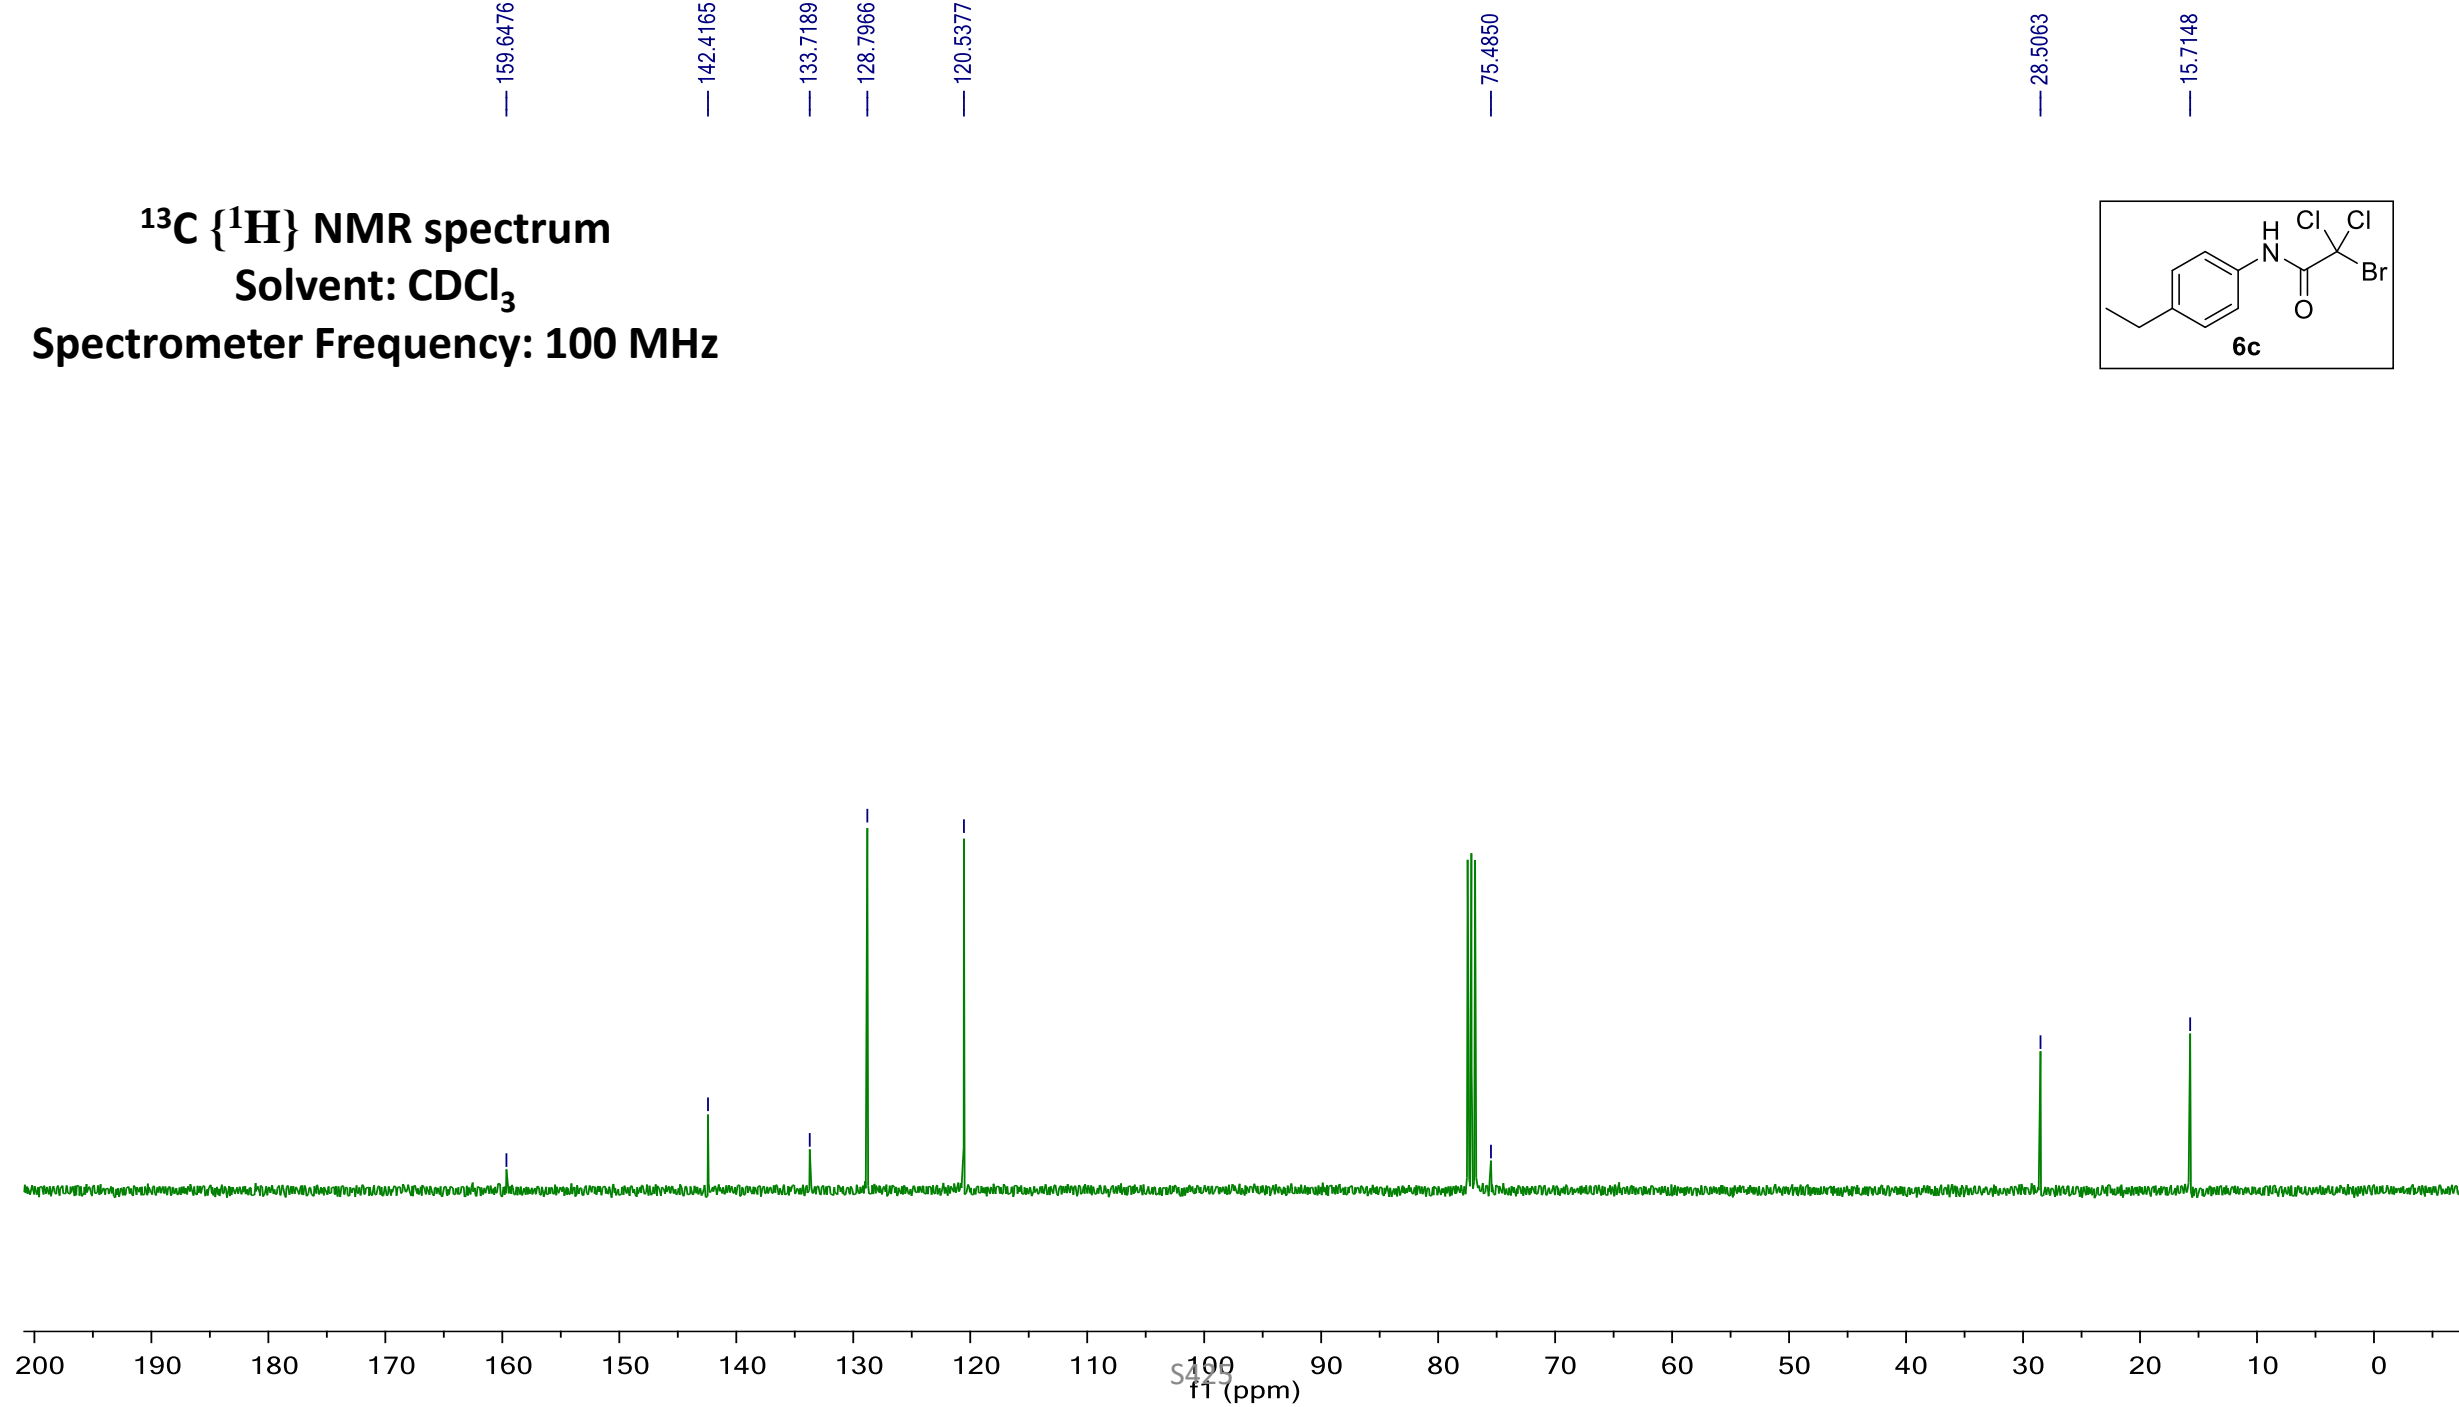

**$^1\text{H}$  NMR spectrum**  
**Solvent:  $\text{DMSO-}d_6$**   
**Spectrometer Frequency: 600 MHz**

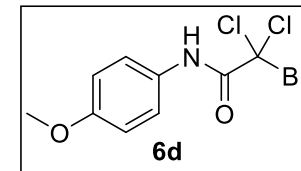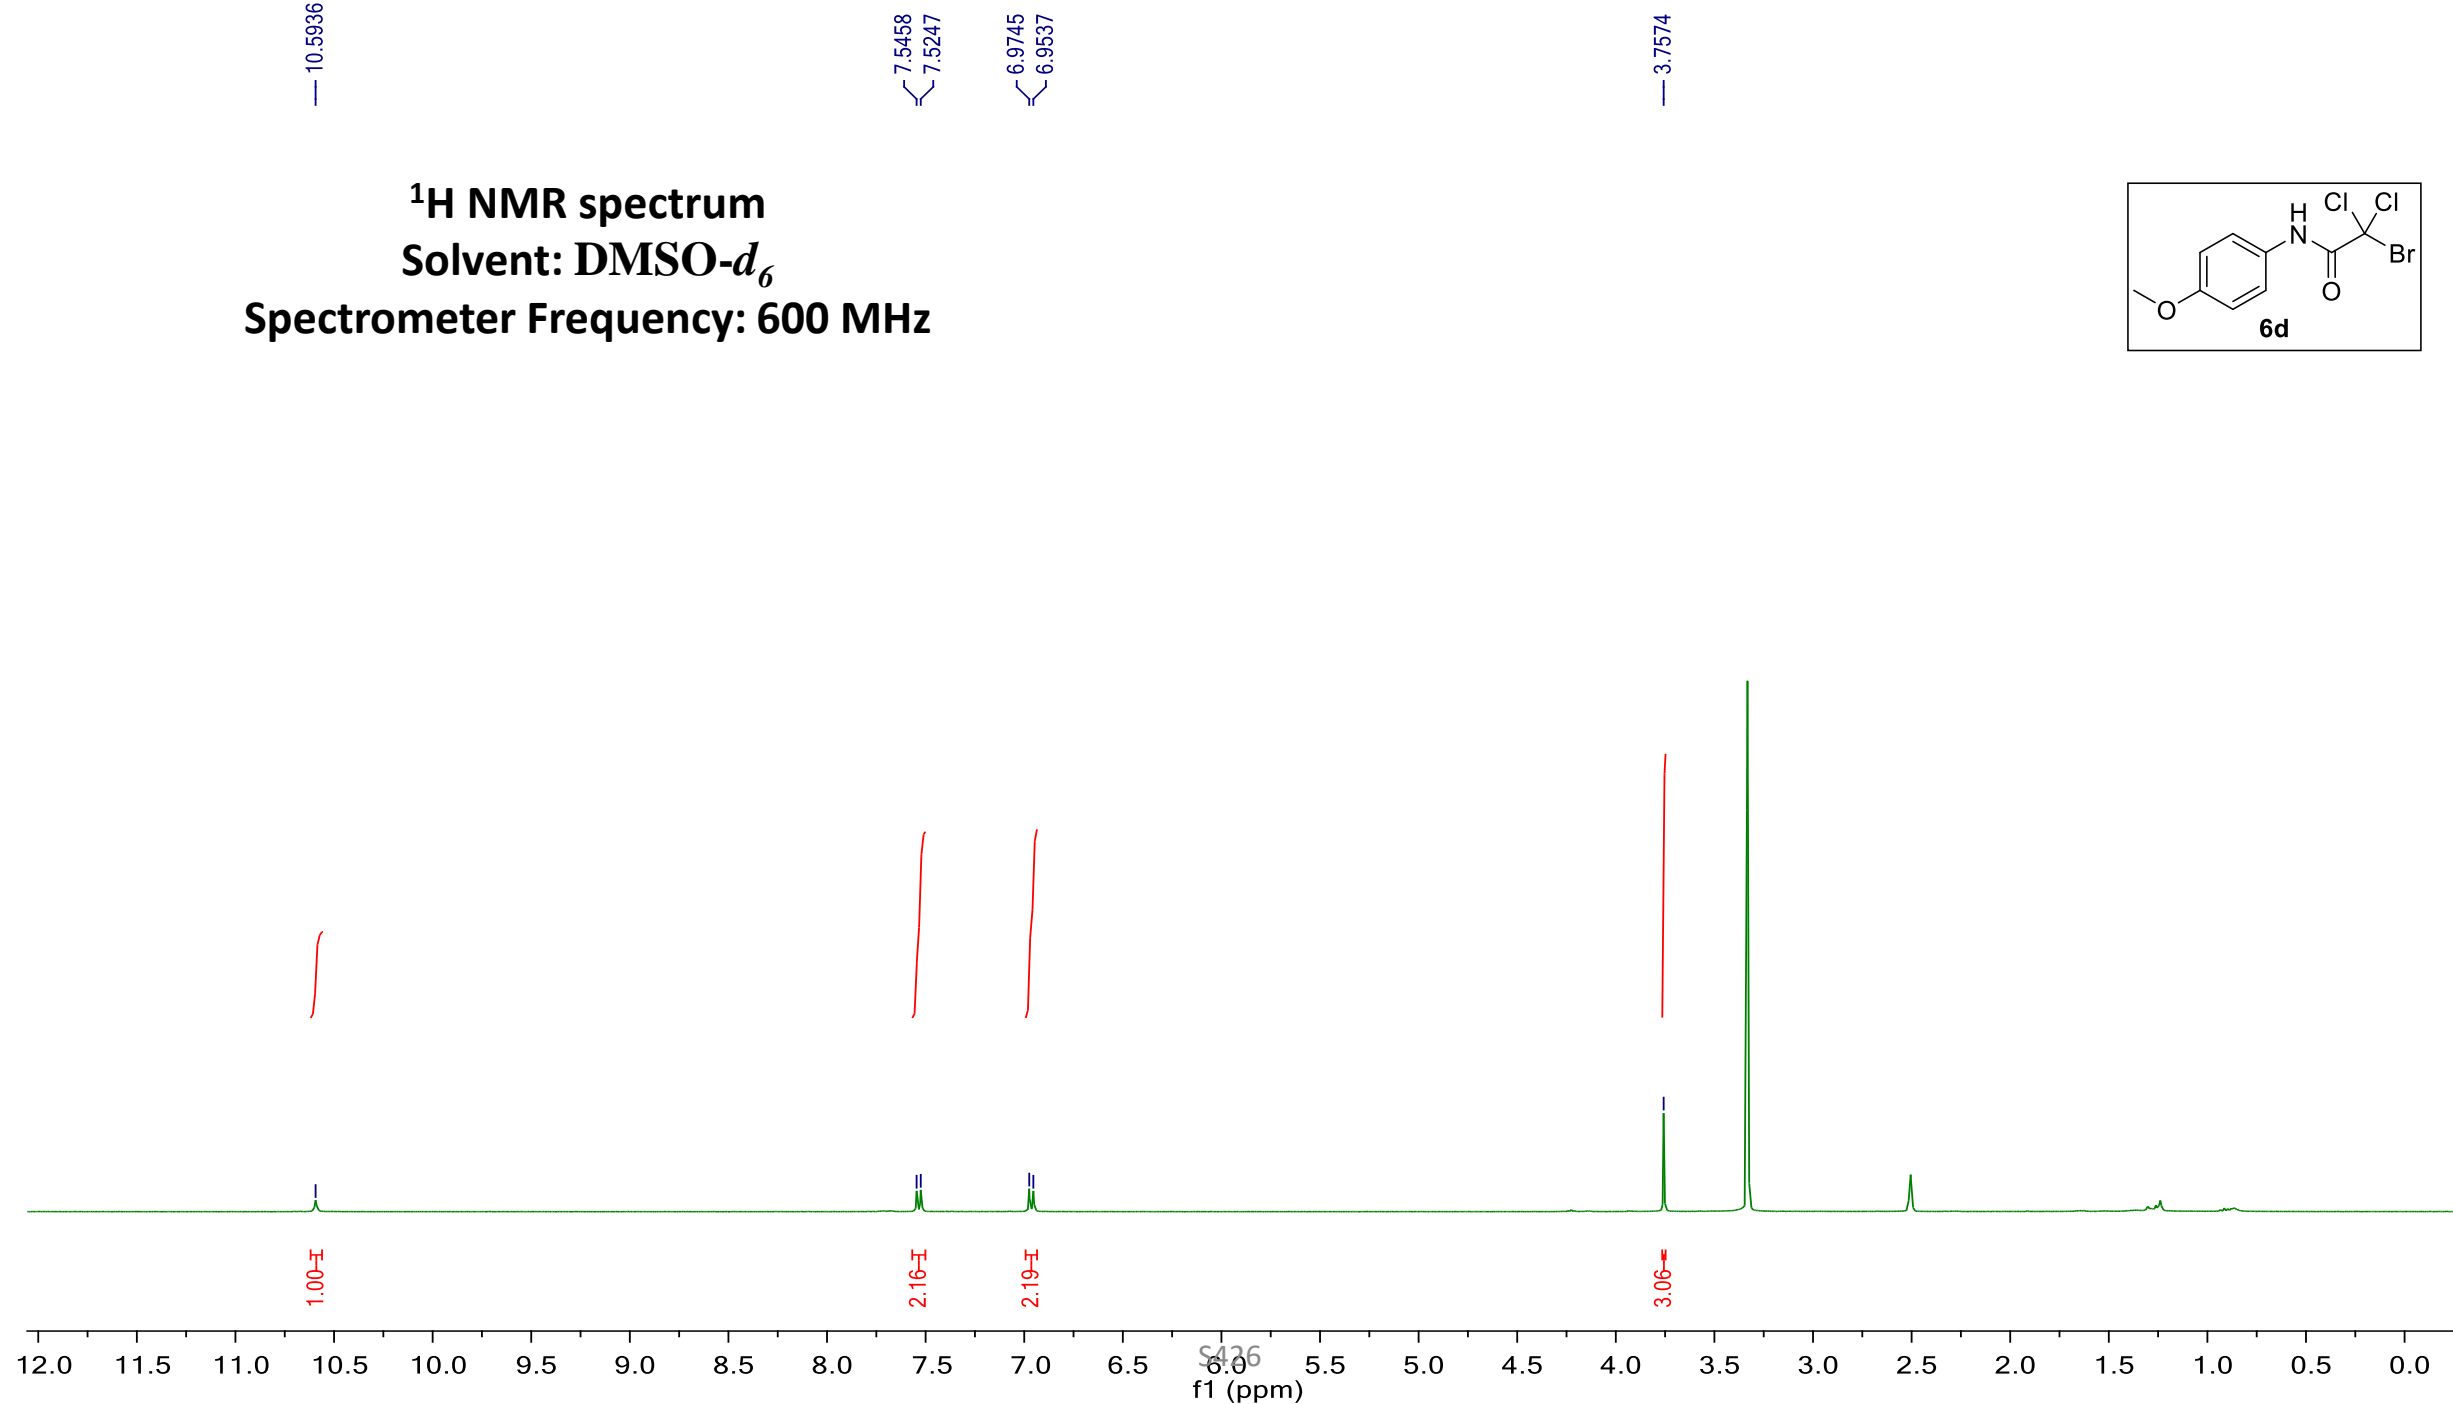

**$^{13}\text{C}$   $\{^1\text{H}\}$  NMR spectrum**  
**Solvent:  $\text{CDCl}_3$**   
**Spectrometer Frequency: 151 MHz**

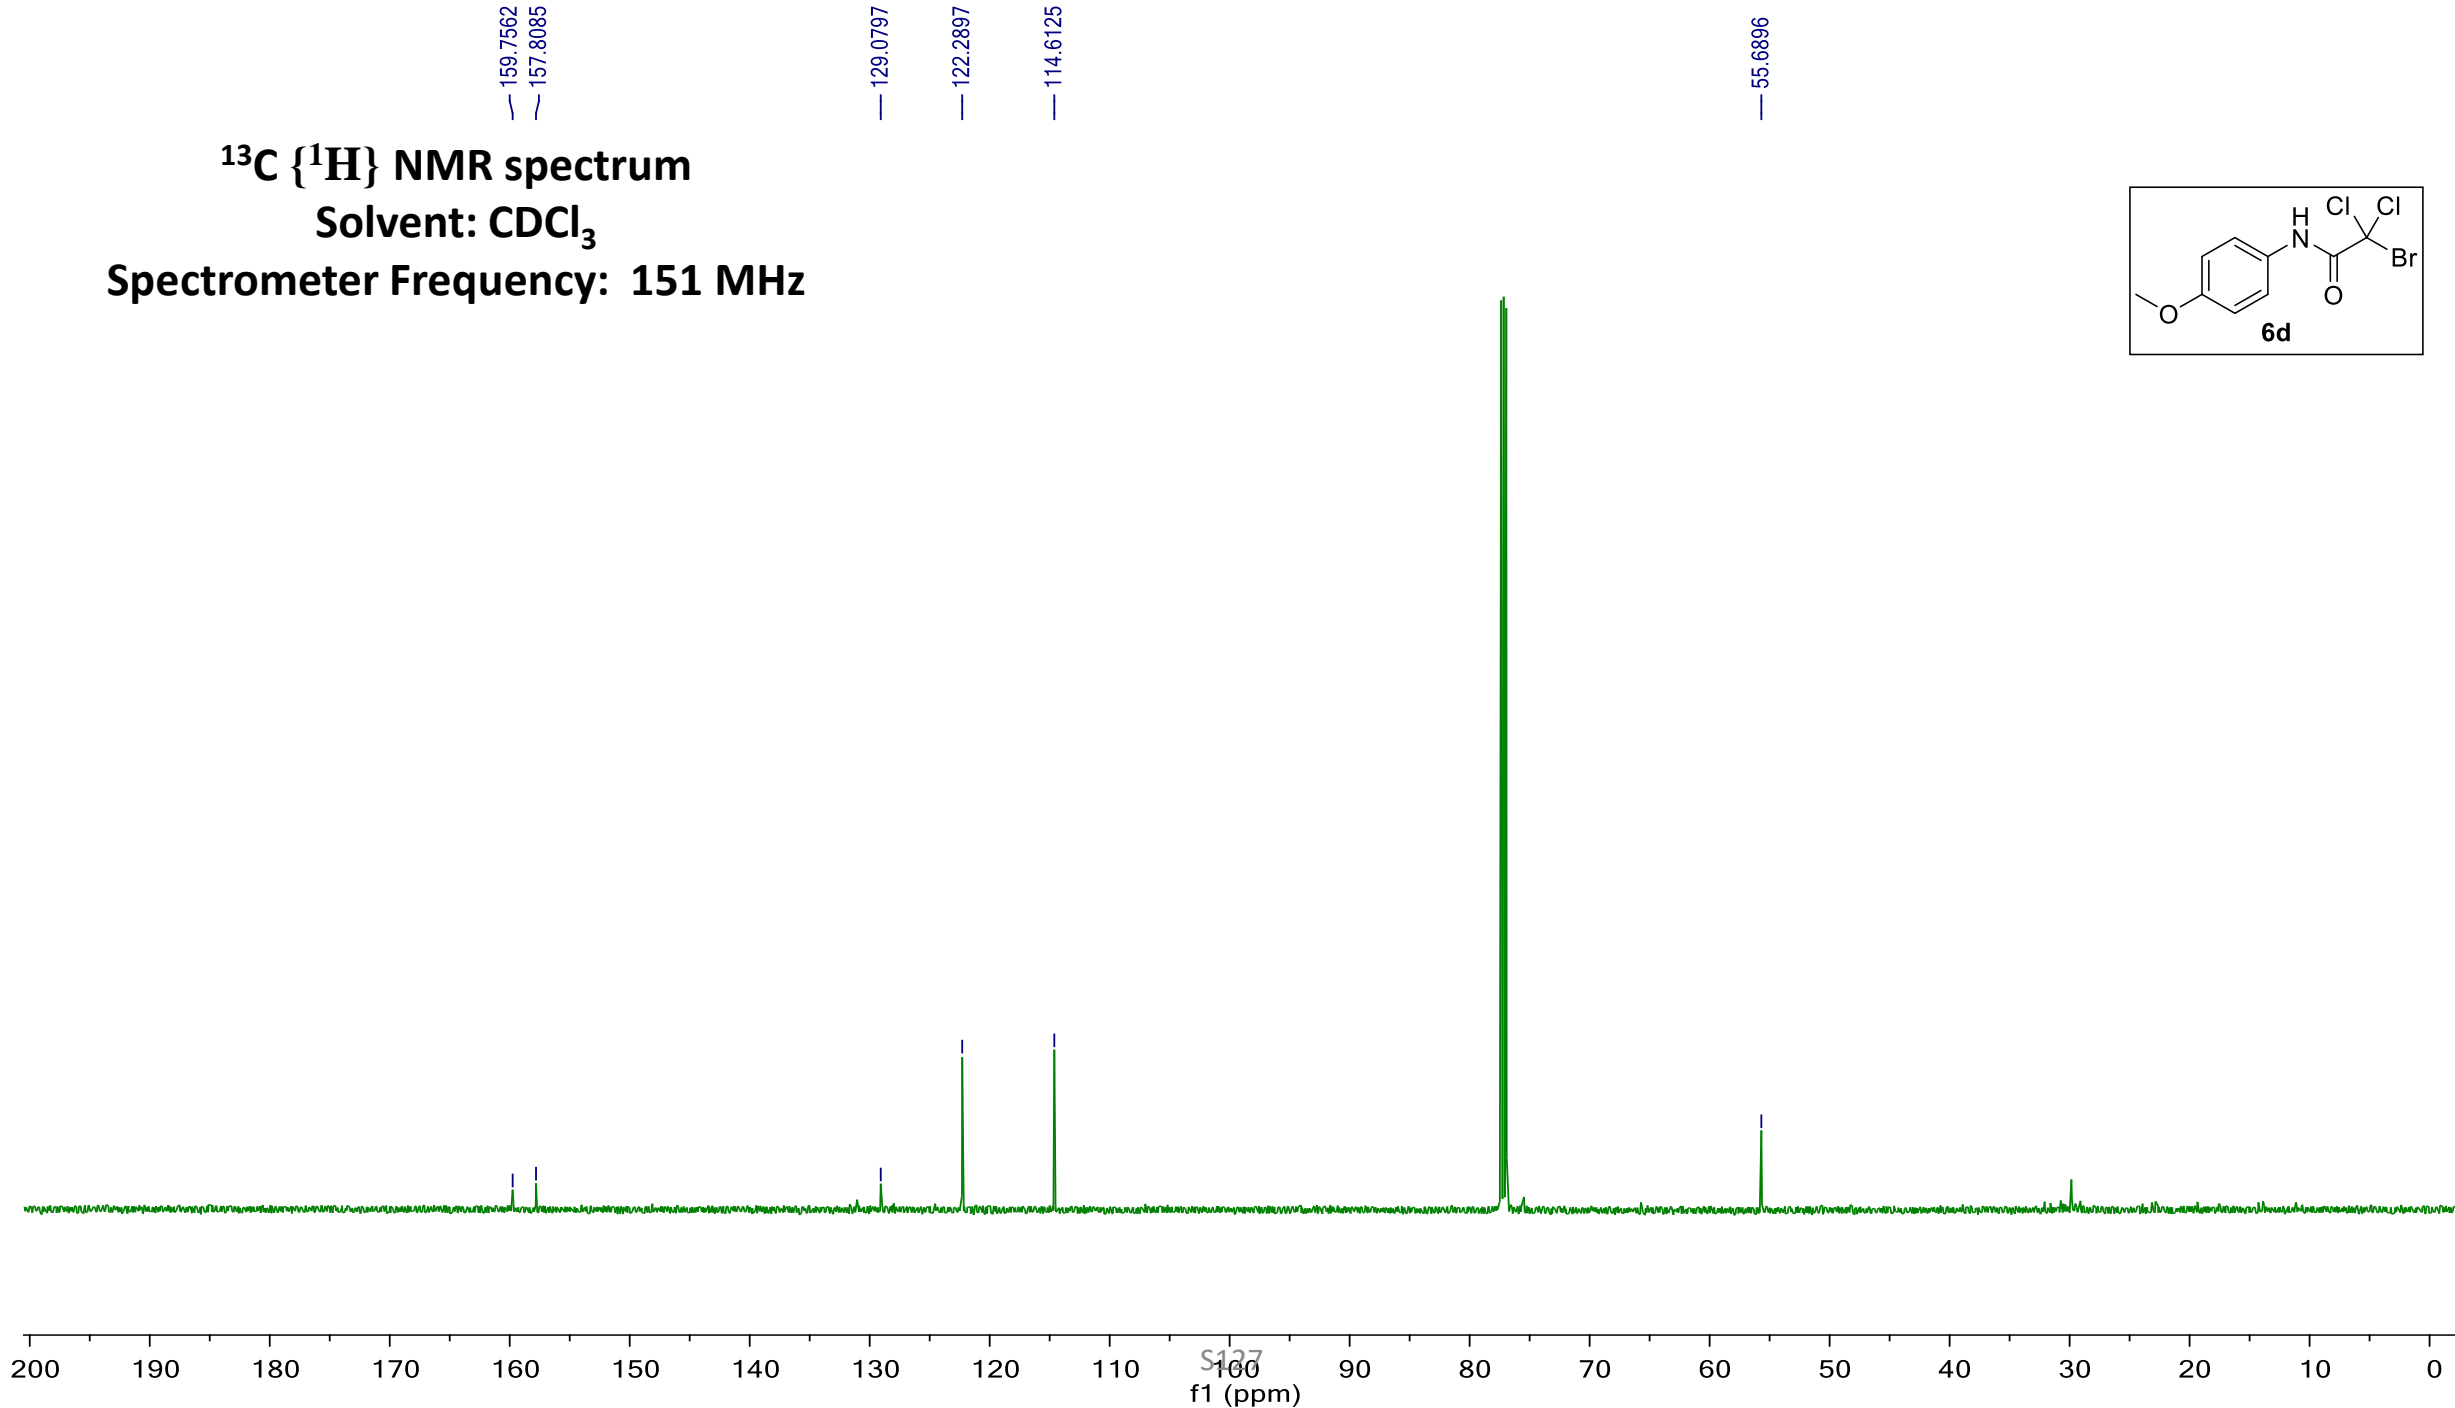

**$^1\text{H}$  NMR spectrum**  
**Solvent:  $\text{CDCl}_3$**   
**Spectrometer Frequency: 400 MHz**

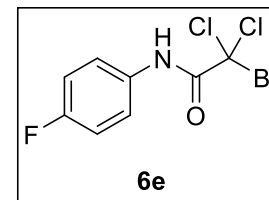

8.4108  
7.5616  
7.5527  
7.5472  
7.5411  
7.5356  
7.5300  
7.5240  
7.5183  
7.5137  
7.0812  
7.0606

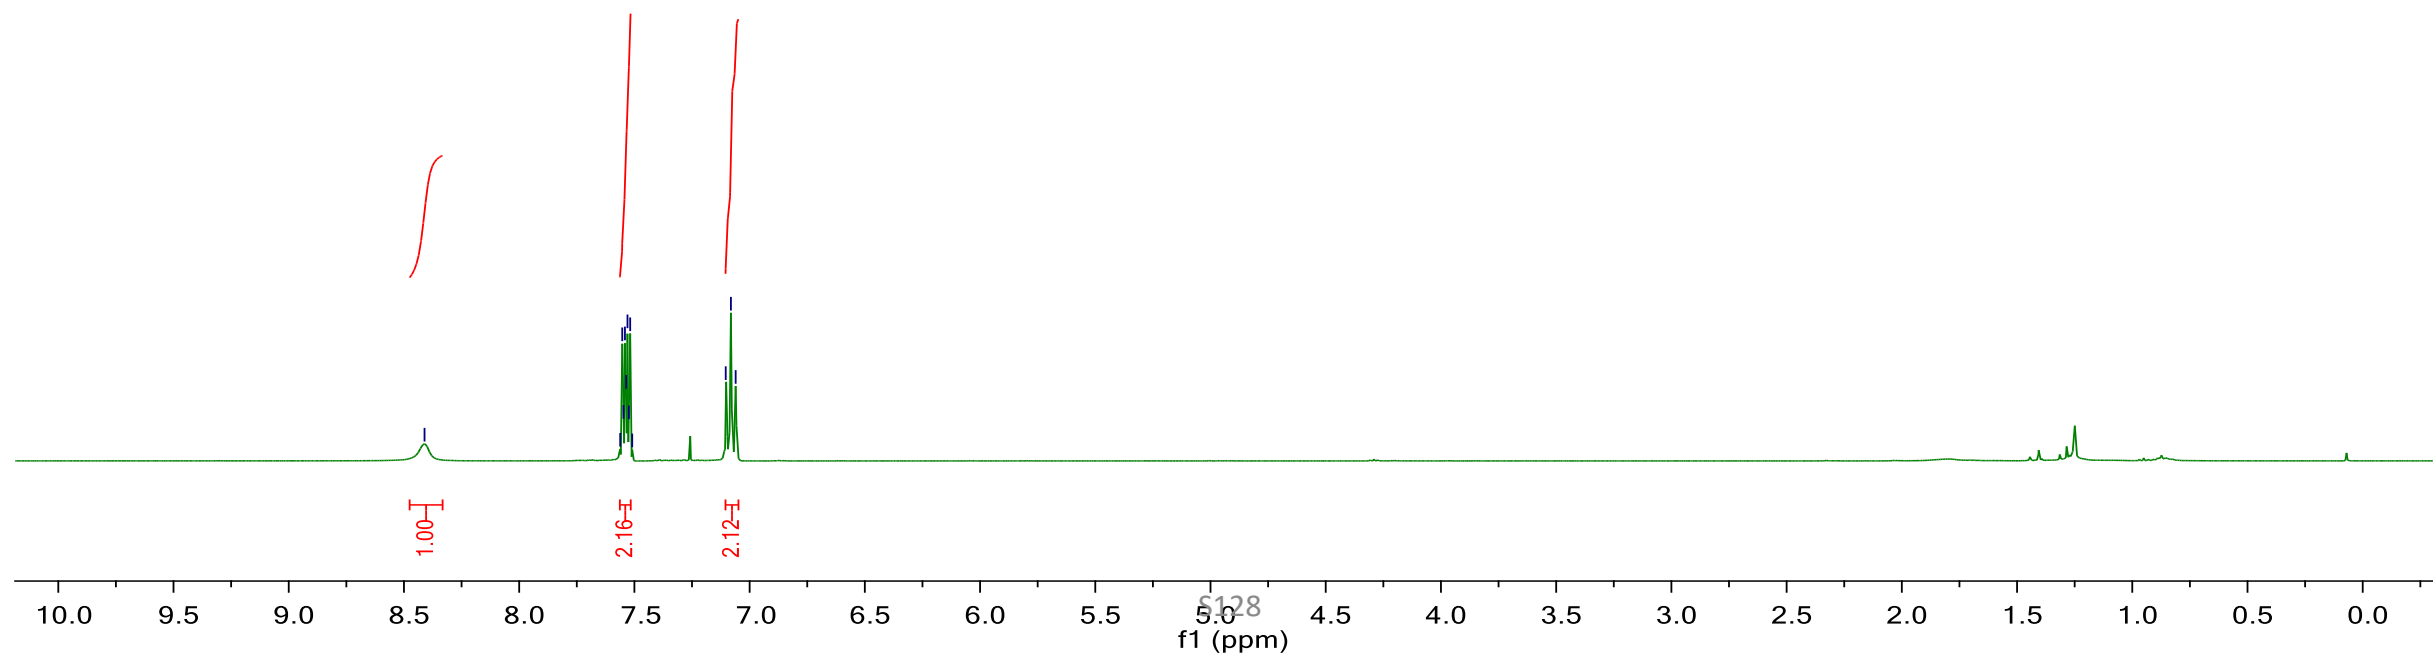

f -scope -aj  
single pulse decoupled gated NOE

**$^{13}\text{C}$  { $^1\text{H}$ } NMR spectrum**  
**Solvent:  $\text{CDCl}_3$**   
**Spectrometer Frequency: 100 MHz**

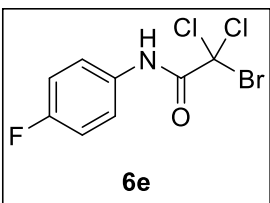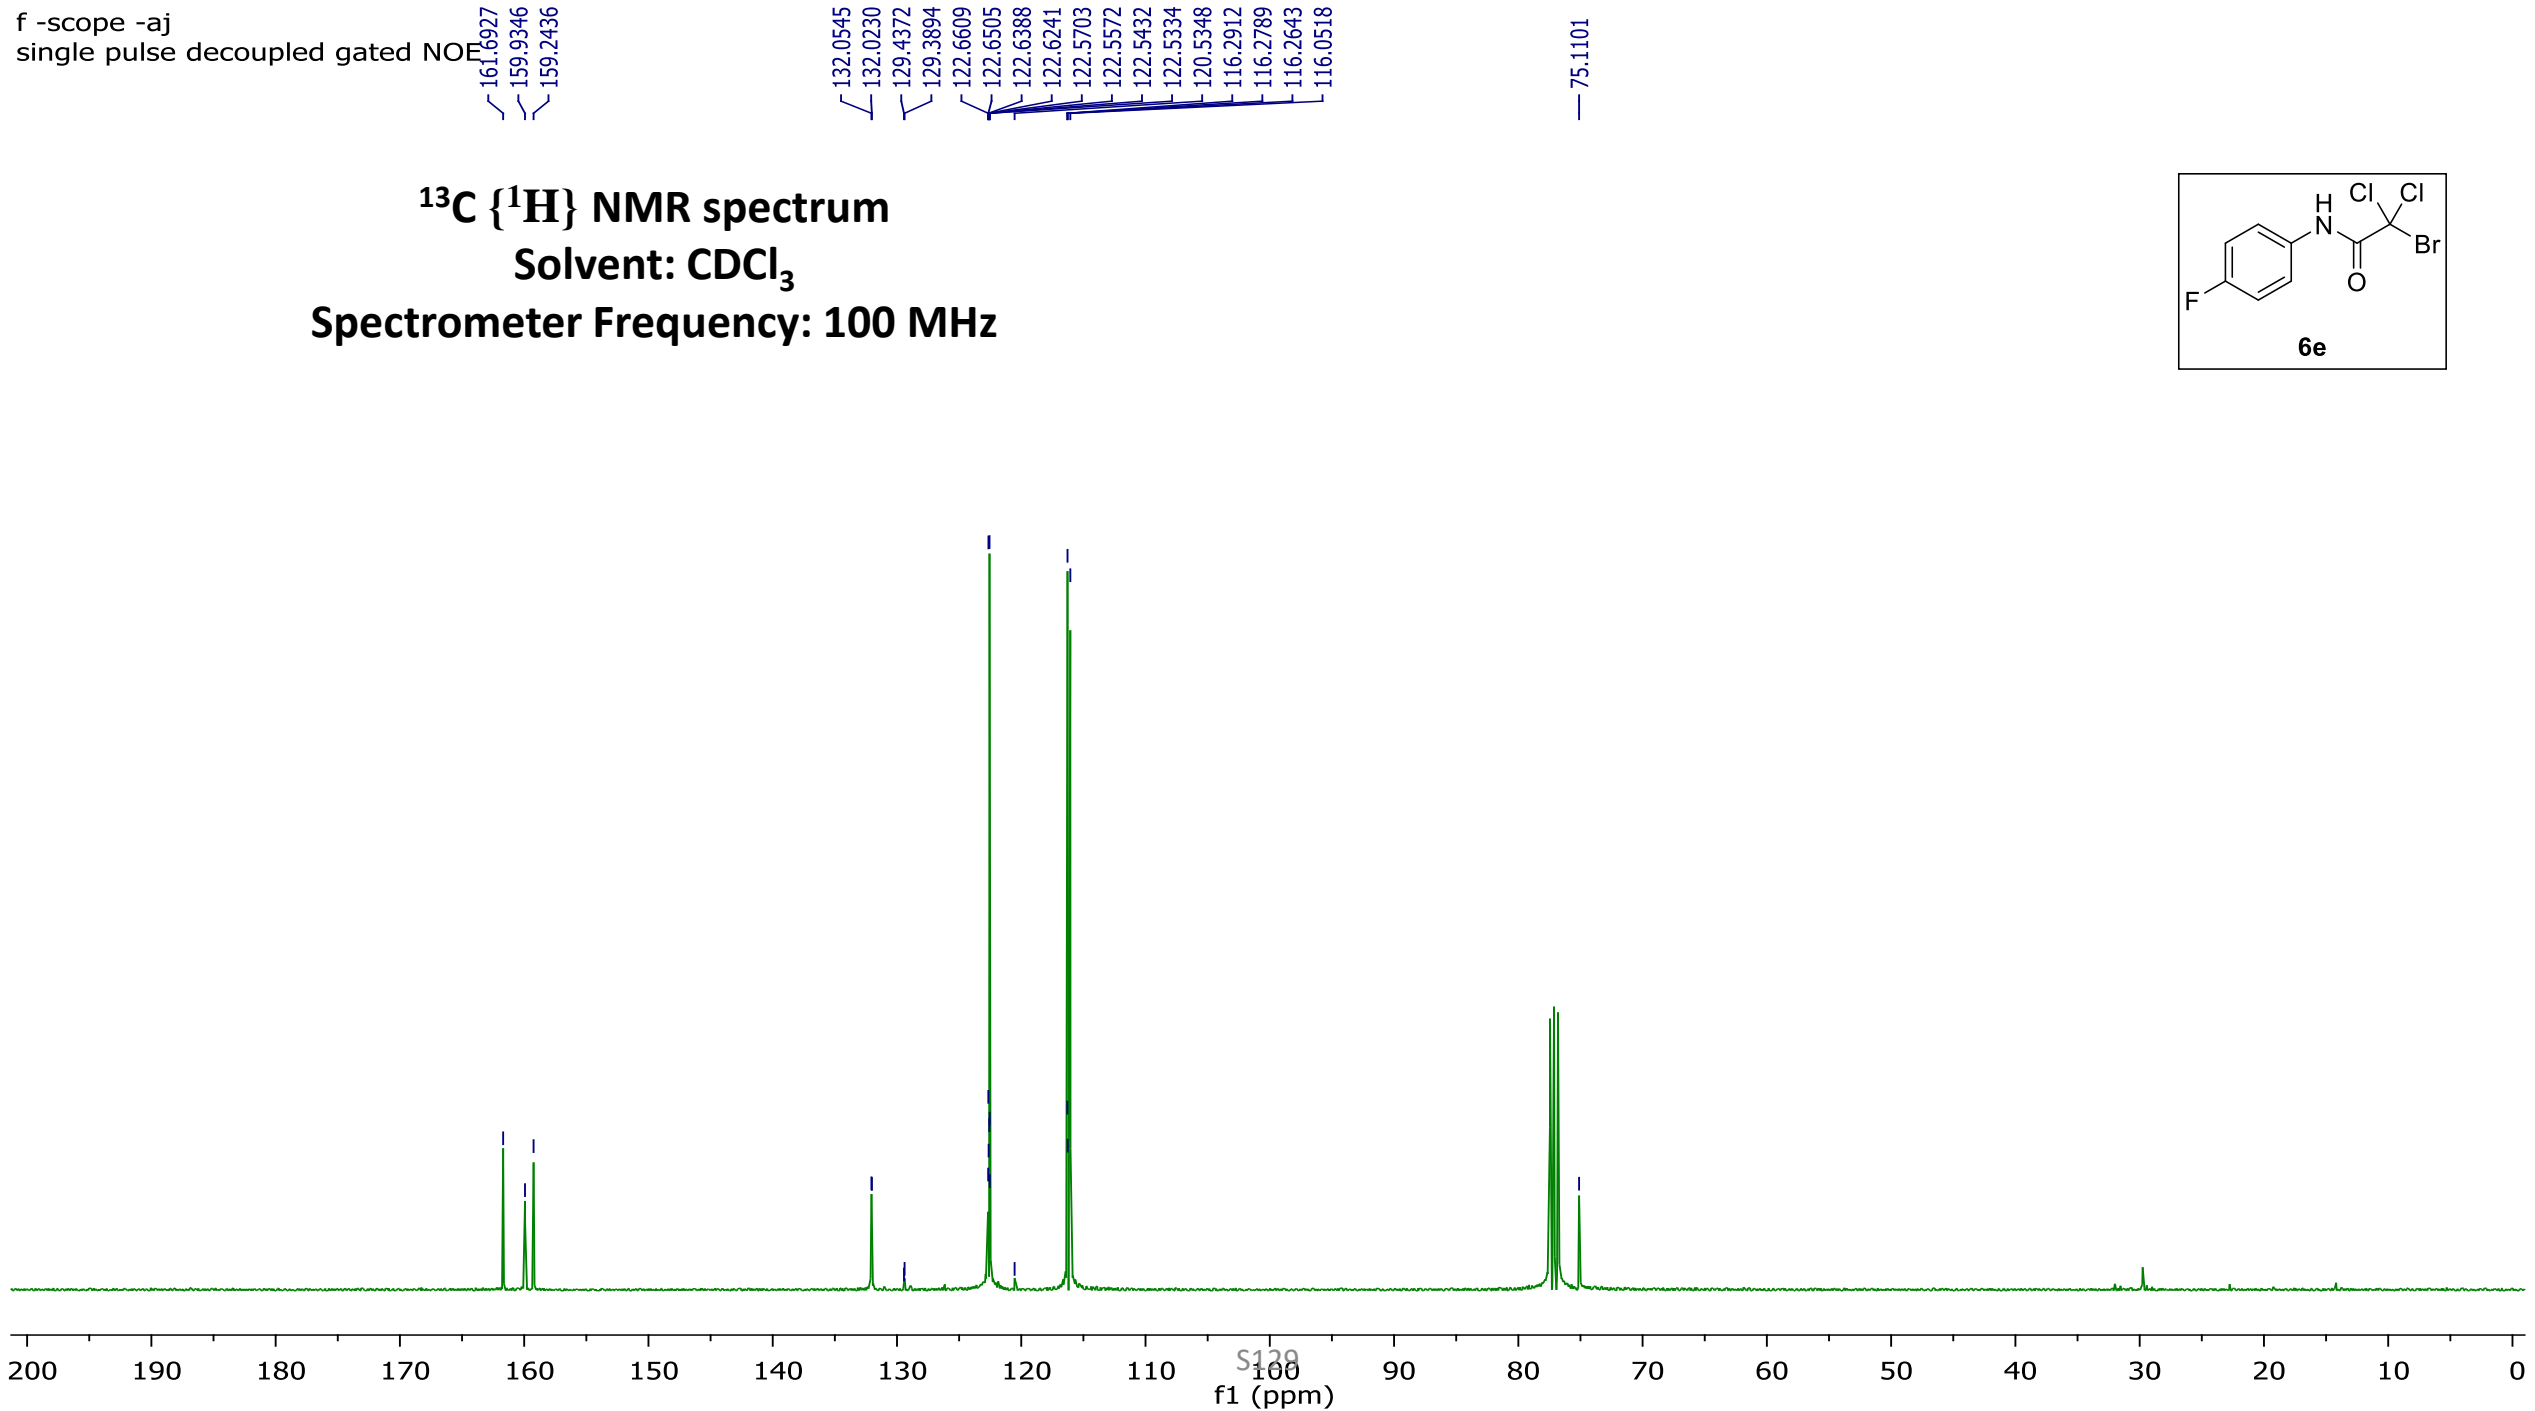

**$^{19}\text{F}\{^1\text{H}\}$  NMR spectrum**  
**Solvent:  $\text{CDCl}_3$**   
**Spectrometer Frequency: 376 MHz**

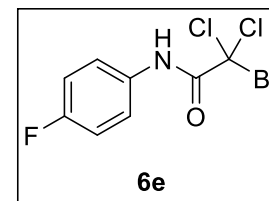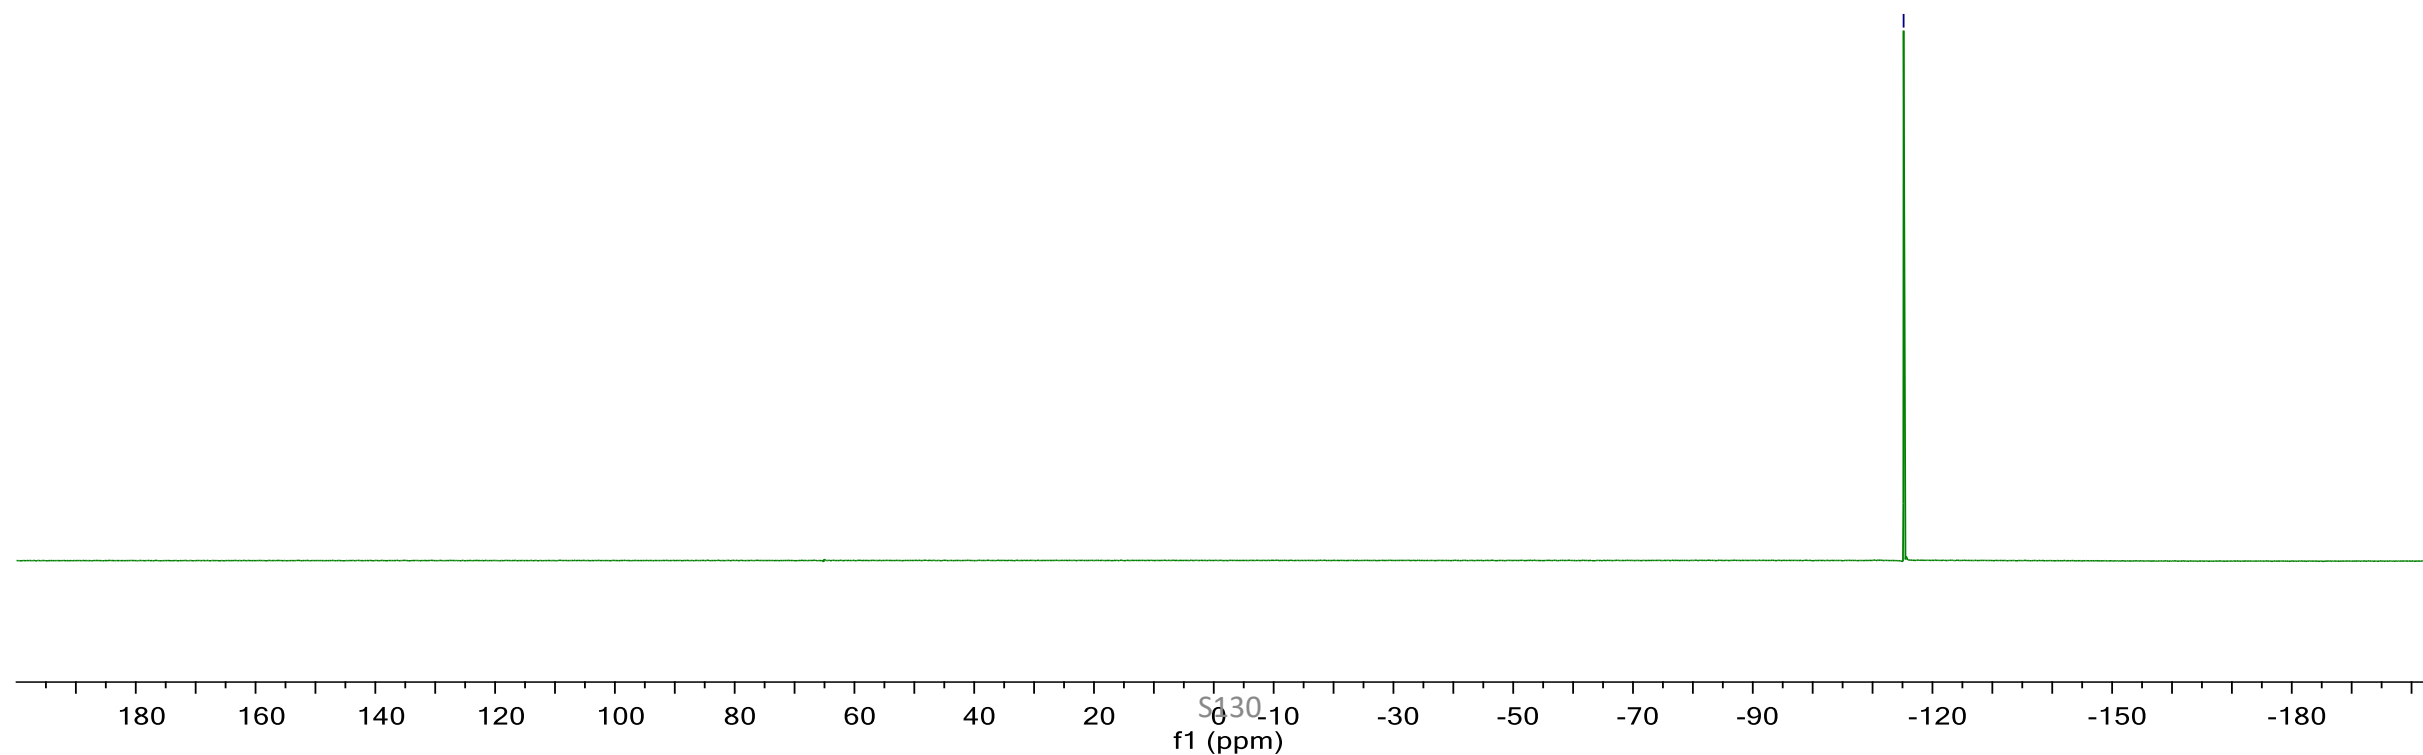

**$^1\text{H}$  NMR spectrum**  
**Solvent:  $\text{DMSO-}d_6$**   
**Spectrometer Frequency: 400 MHz**

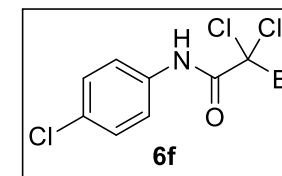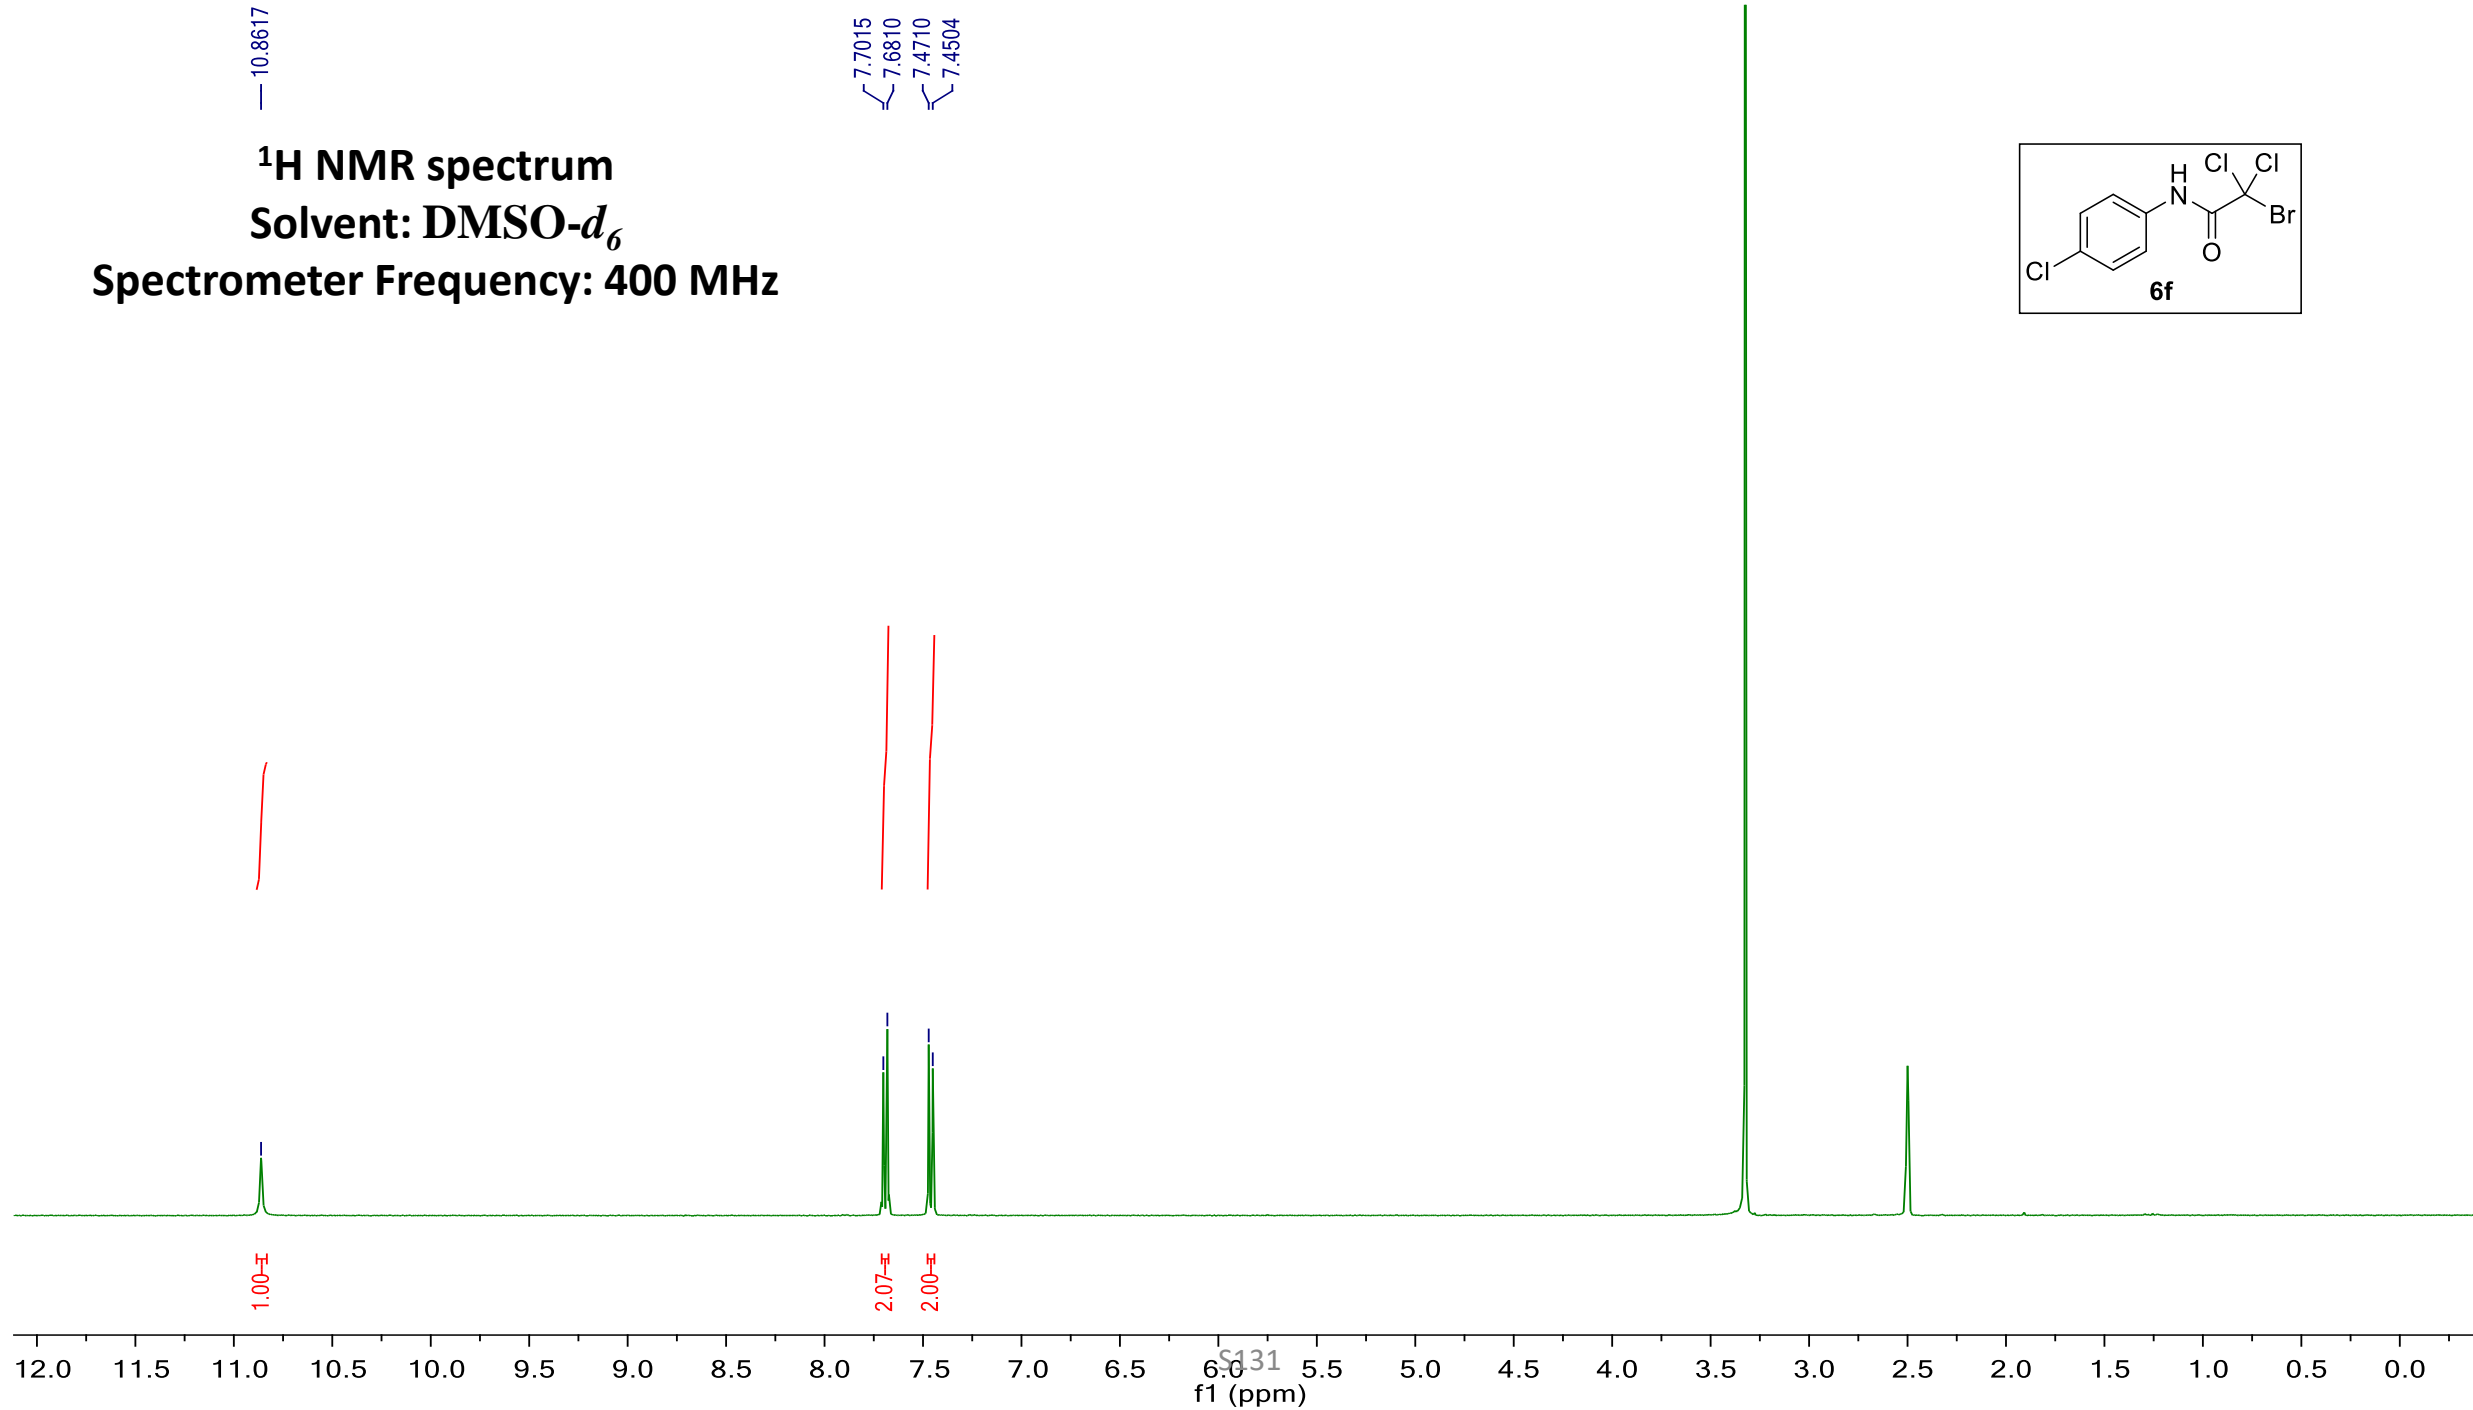

**$^{13}\text{C}$   $\{^1\text{H}\}$  NMR spectrum**  
**Solvent:  $\text{CDCl}_3$**   
**Spectrometer Frequency: 100 MHz**

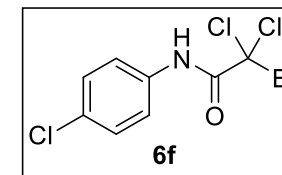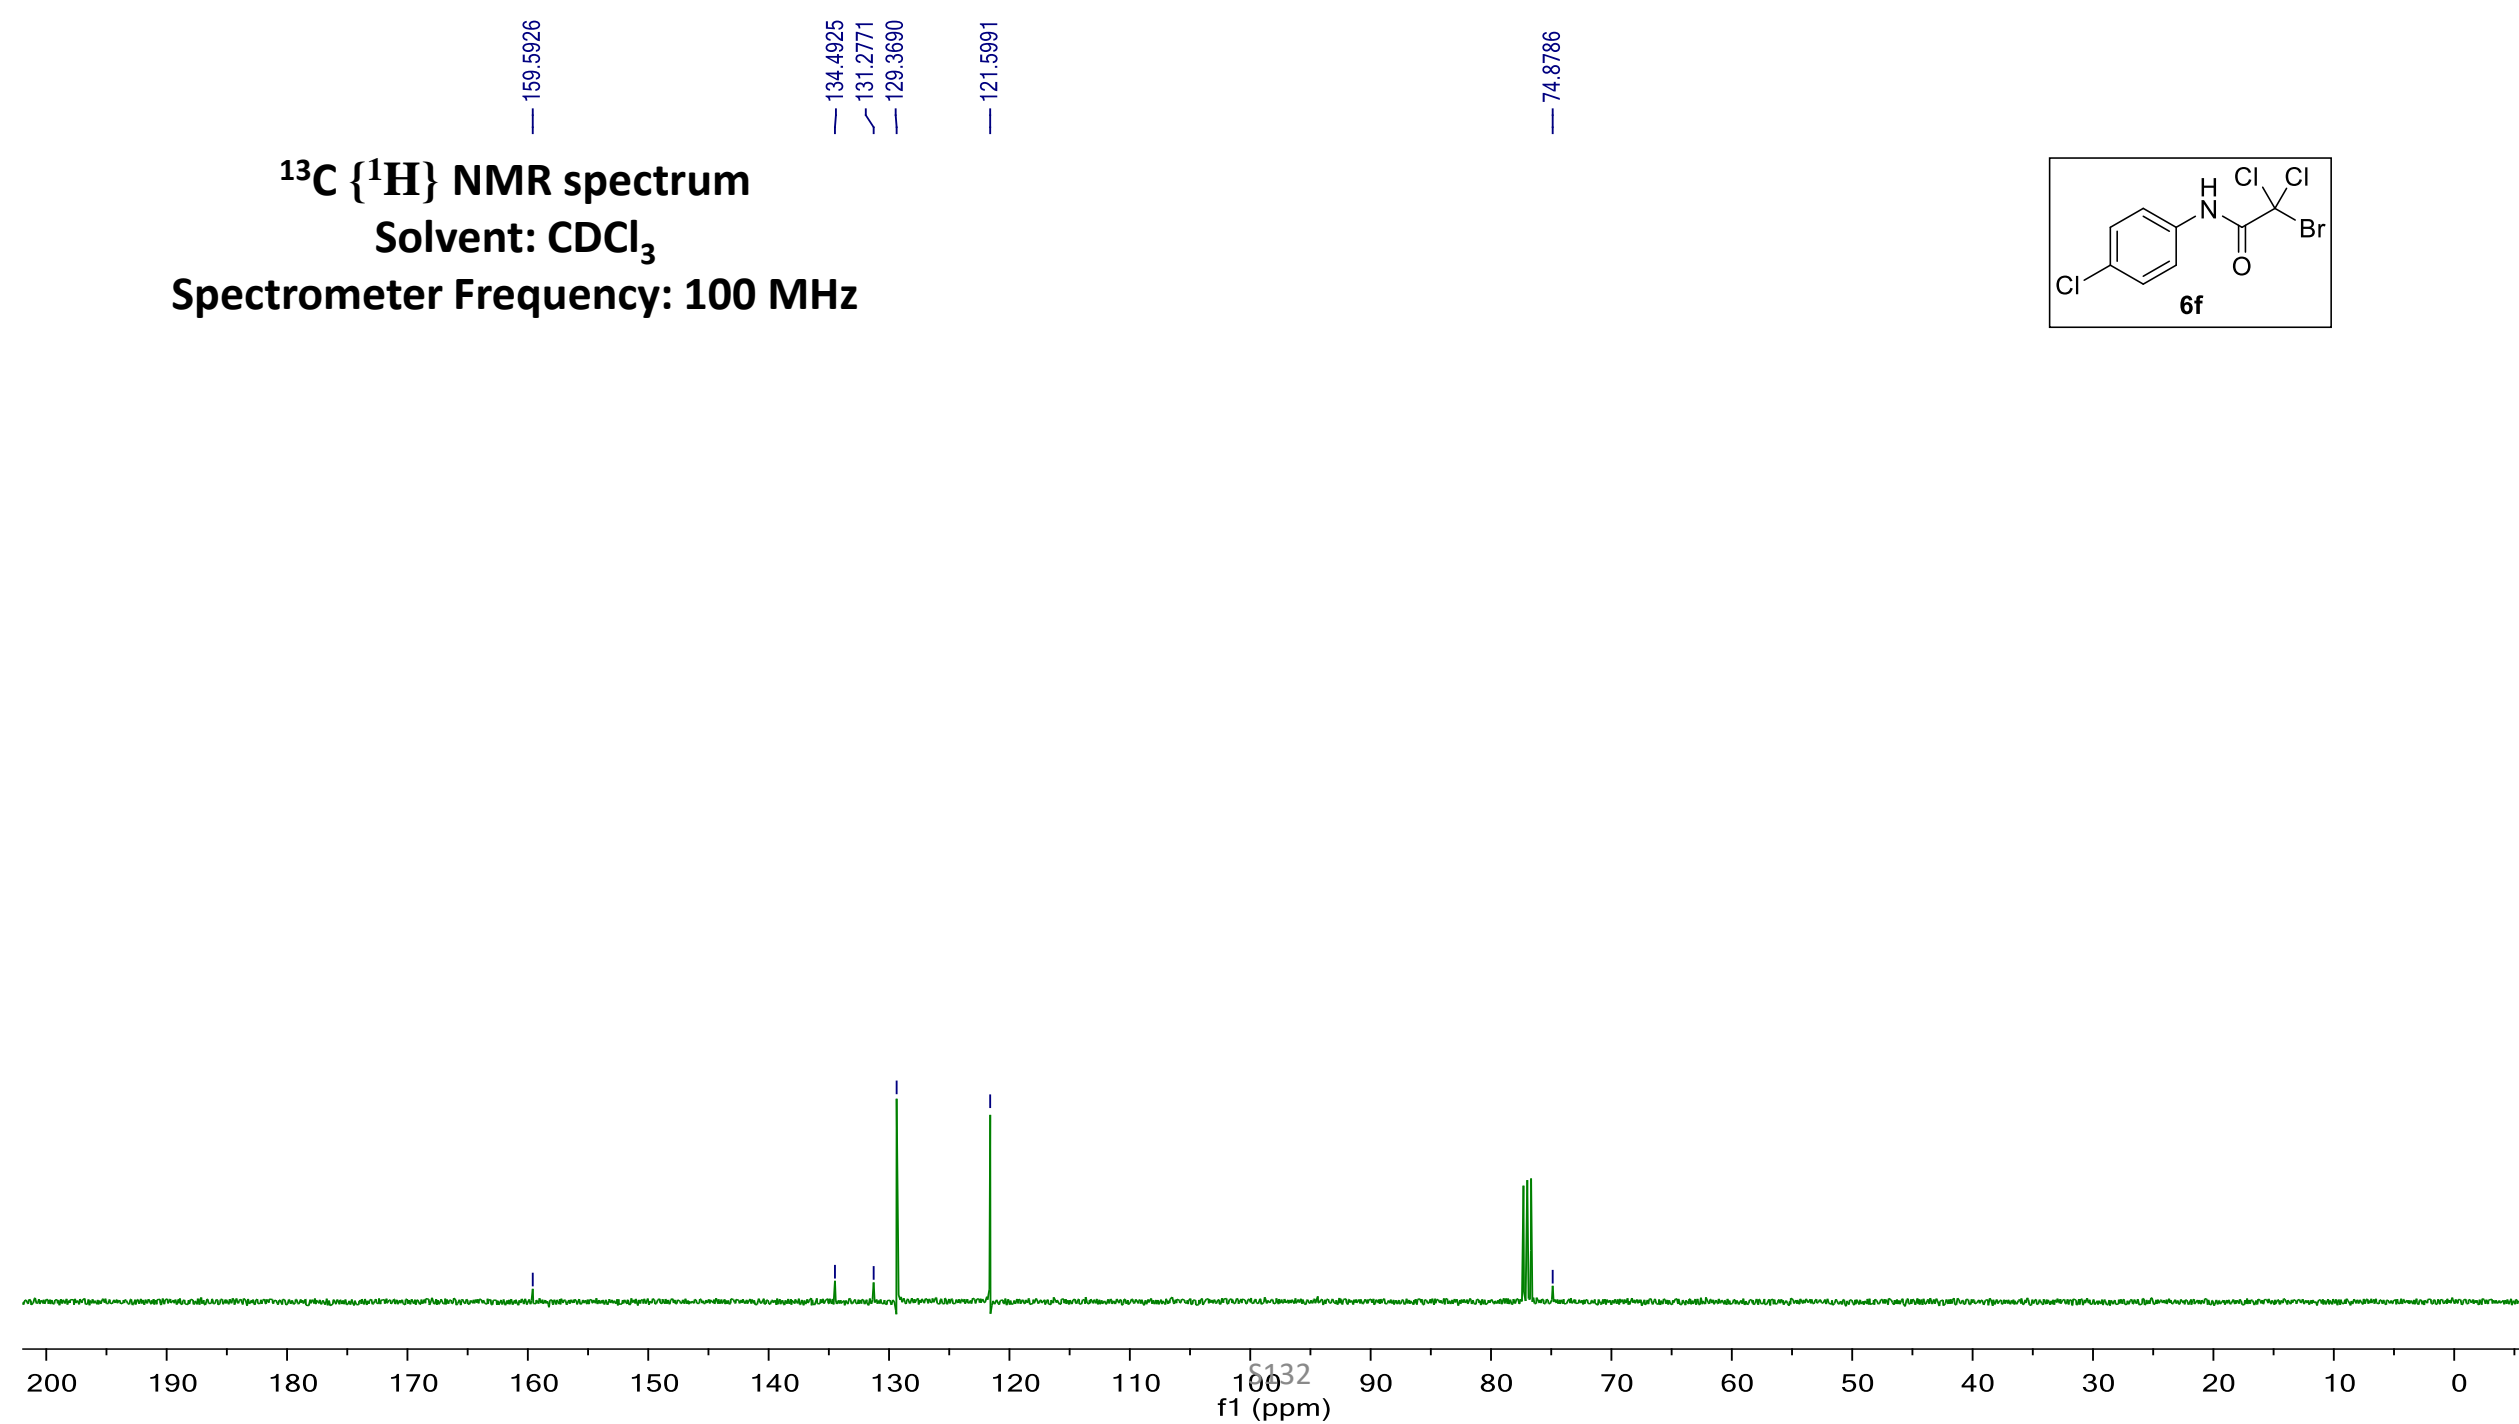

**$^1\text{H}$  NMR spectrum**  
**Solvent:  $\text{CDCl}_3$**   
**Spectrometer Frequency: 400 MHz**

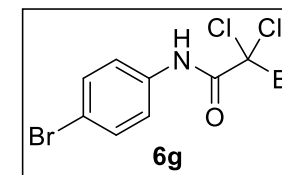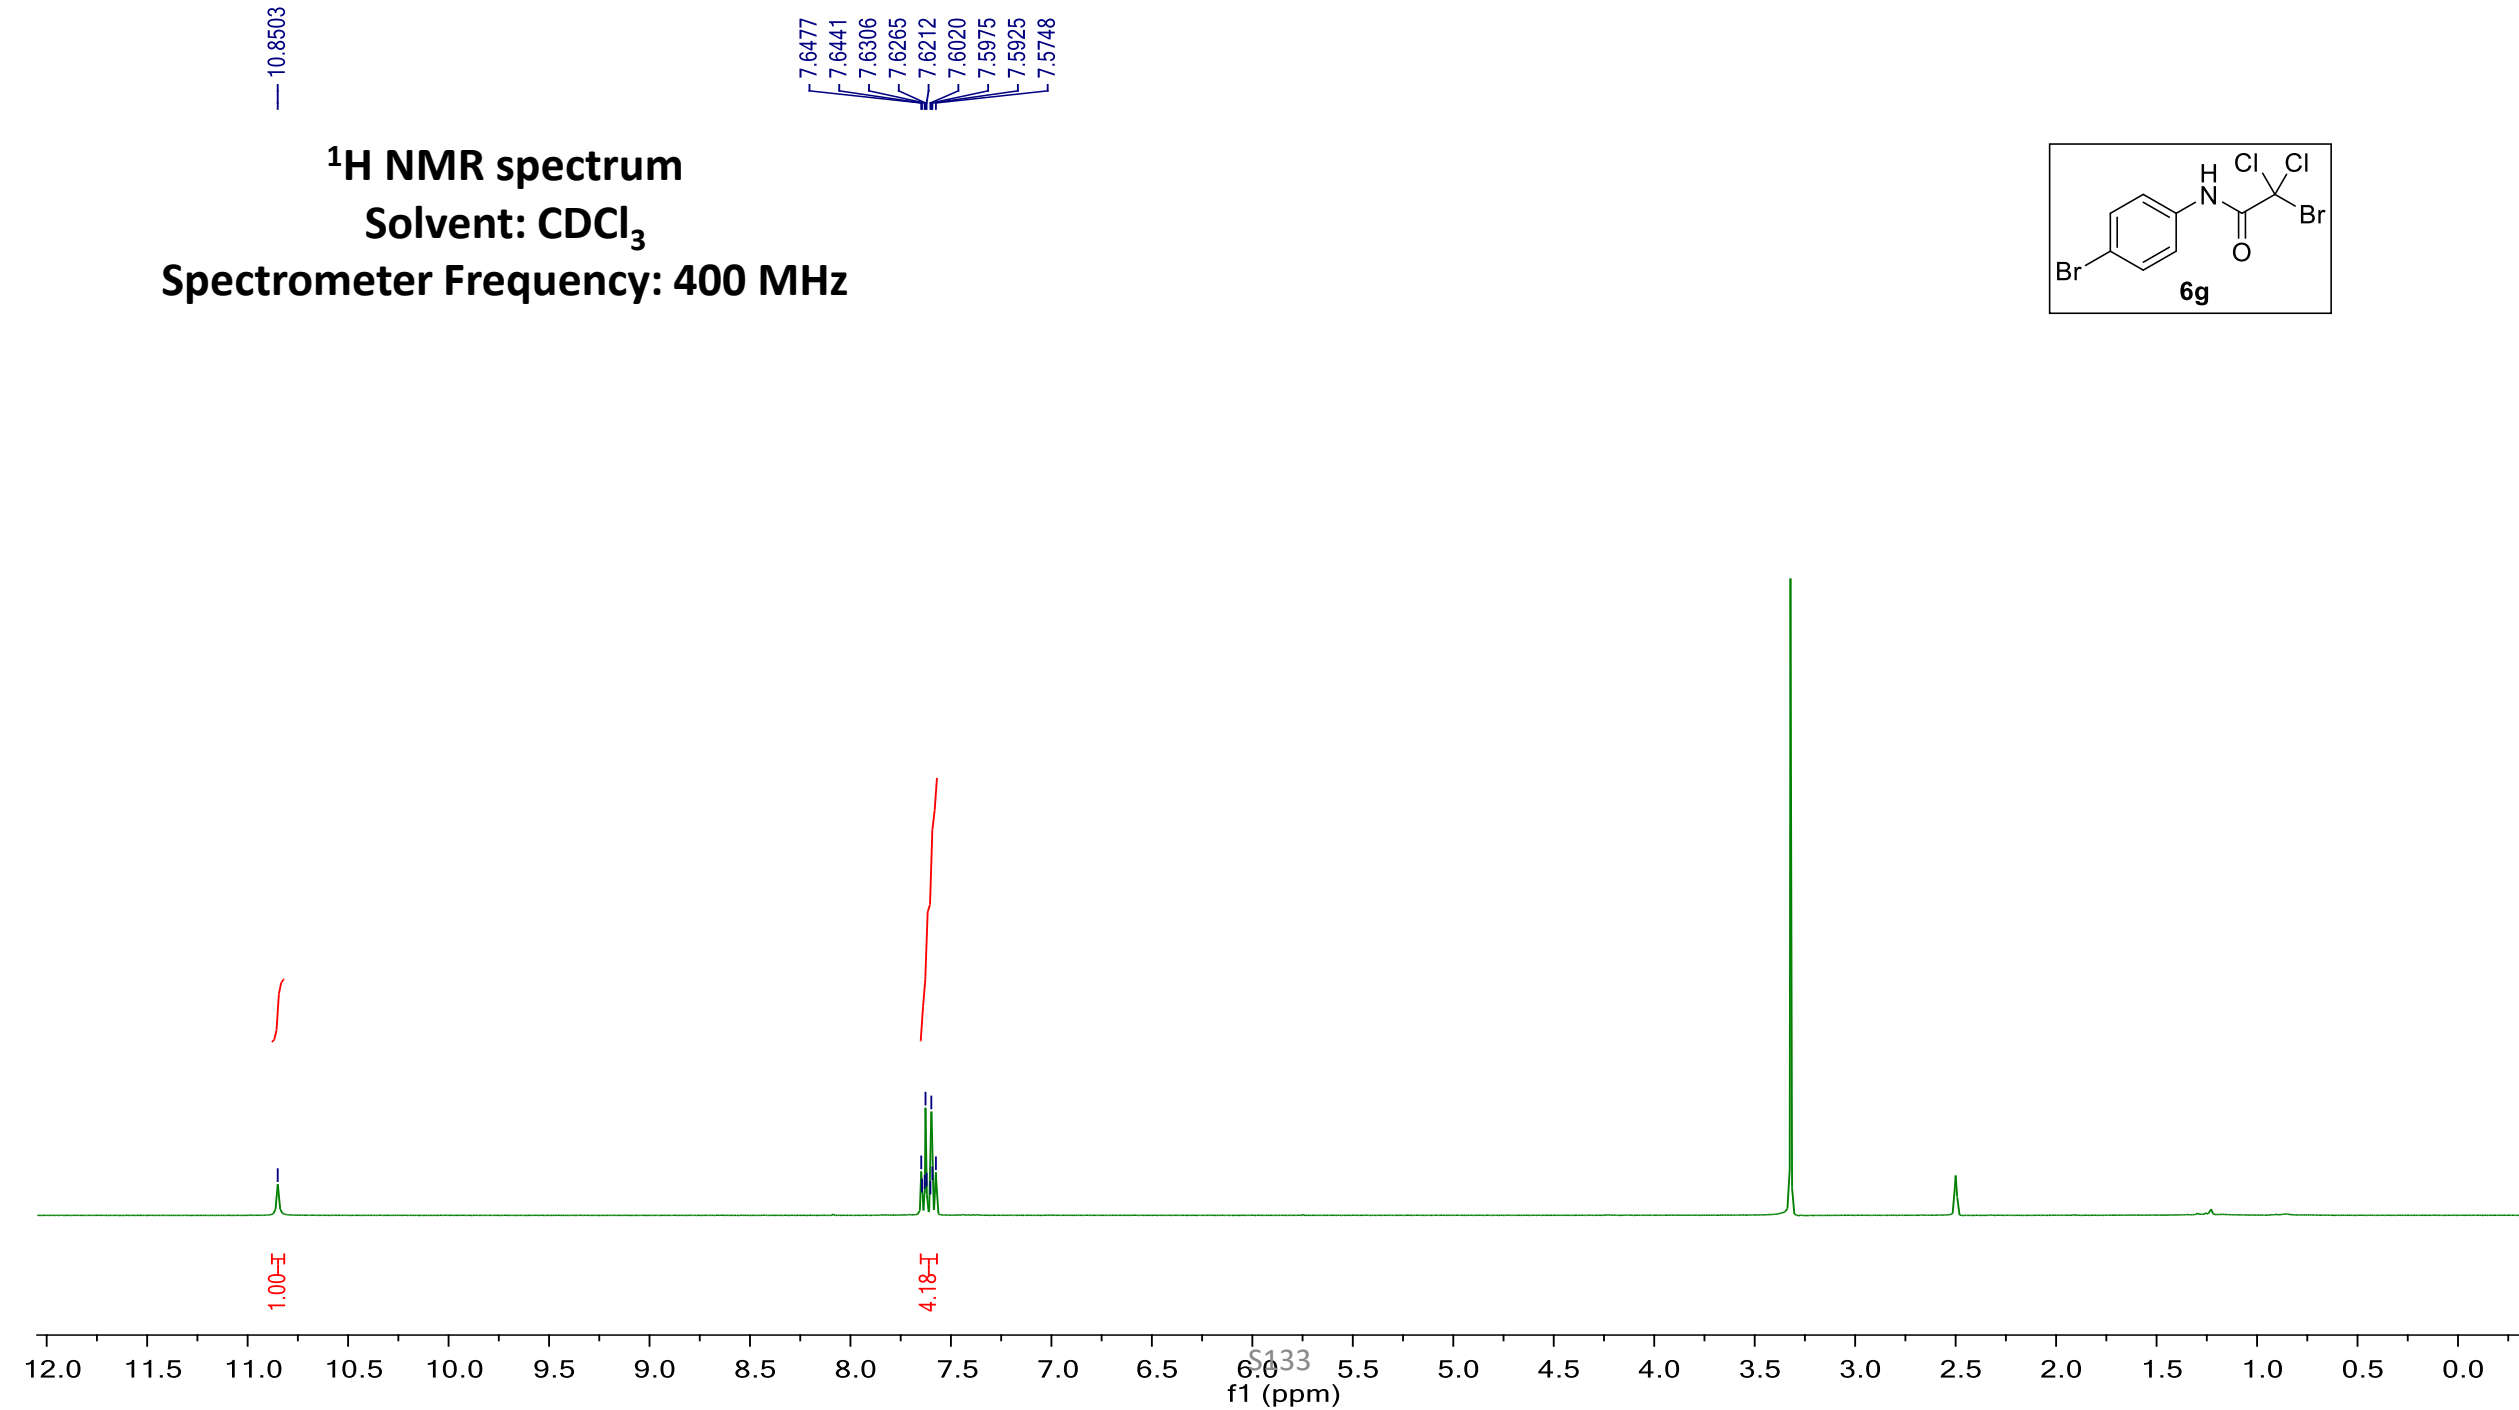

**$^{13}\text{C}$   $\{^1\text{H}\}$  NMR spectrum**  
**Solvent:  $\text{CDCl}_3$**   
**Spectrometer Frequency: 100 MHz**

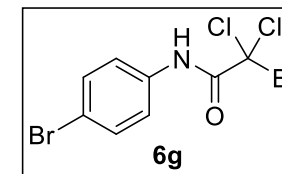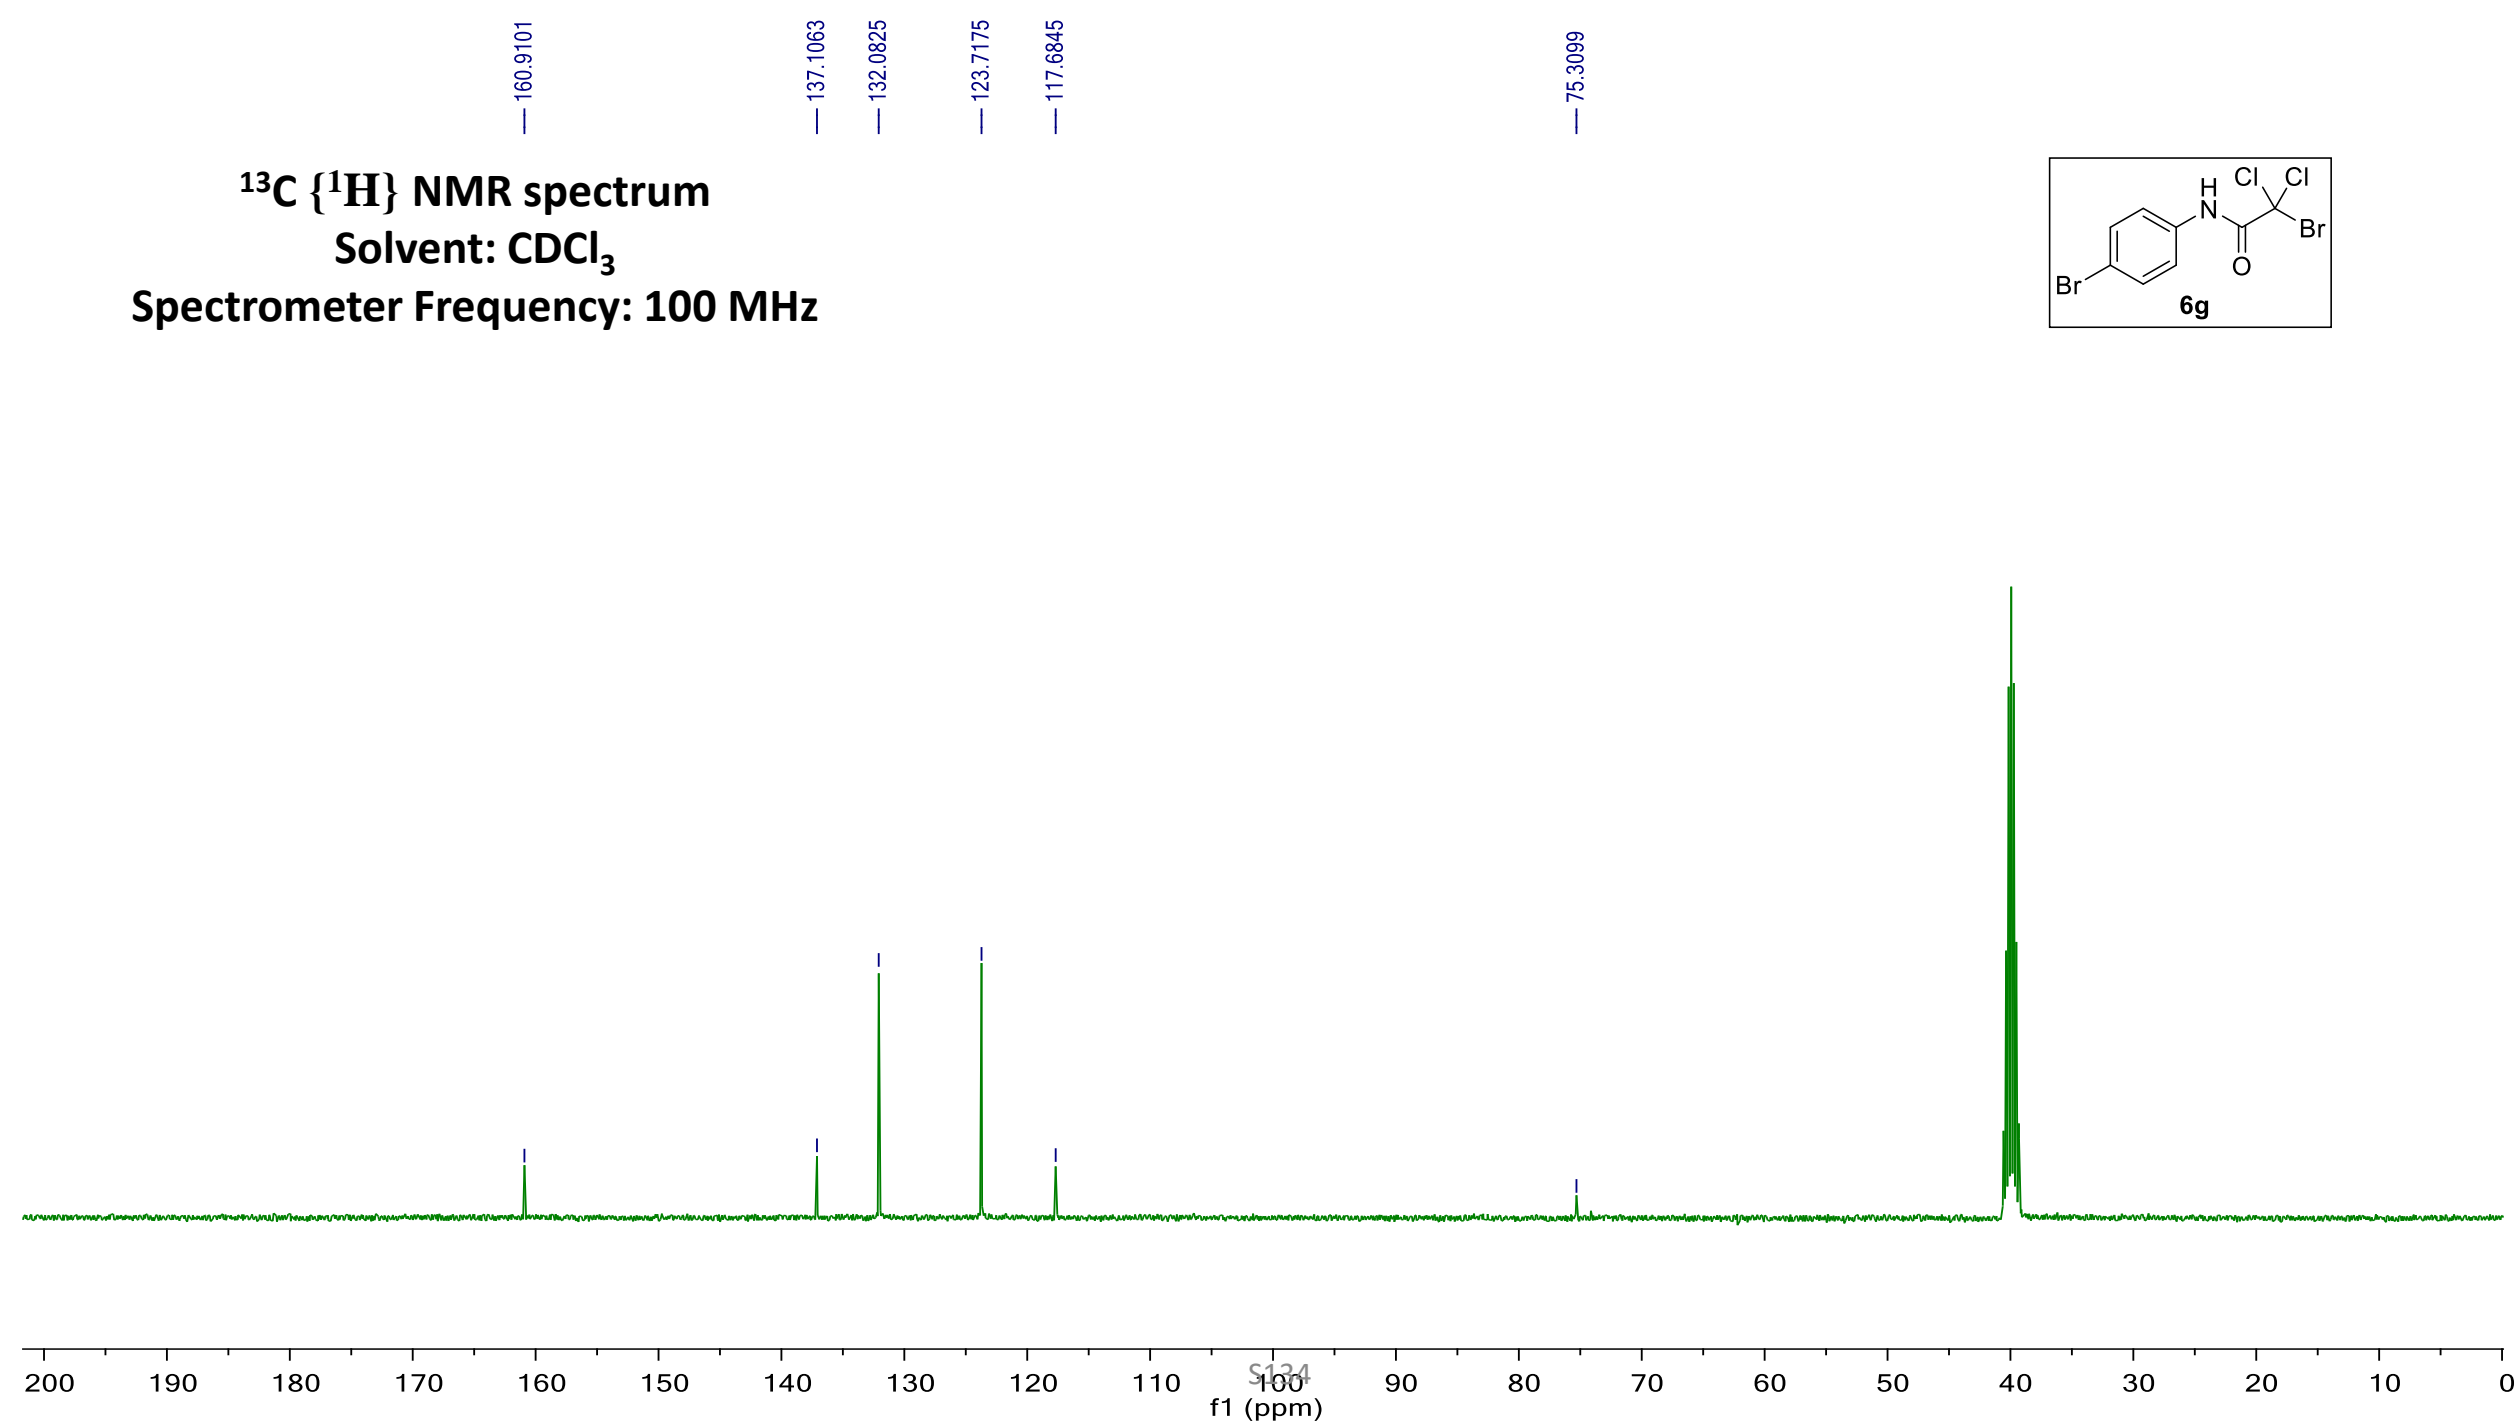

**$^1\text{H}$  NMR spectrum**  
**Solvent:  $\text{CDCl}_3$**   
**Spectrometer Frequency: 400 MHz**

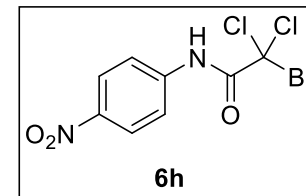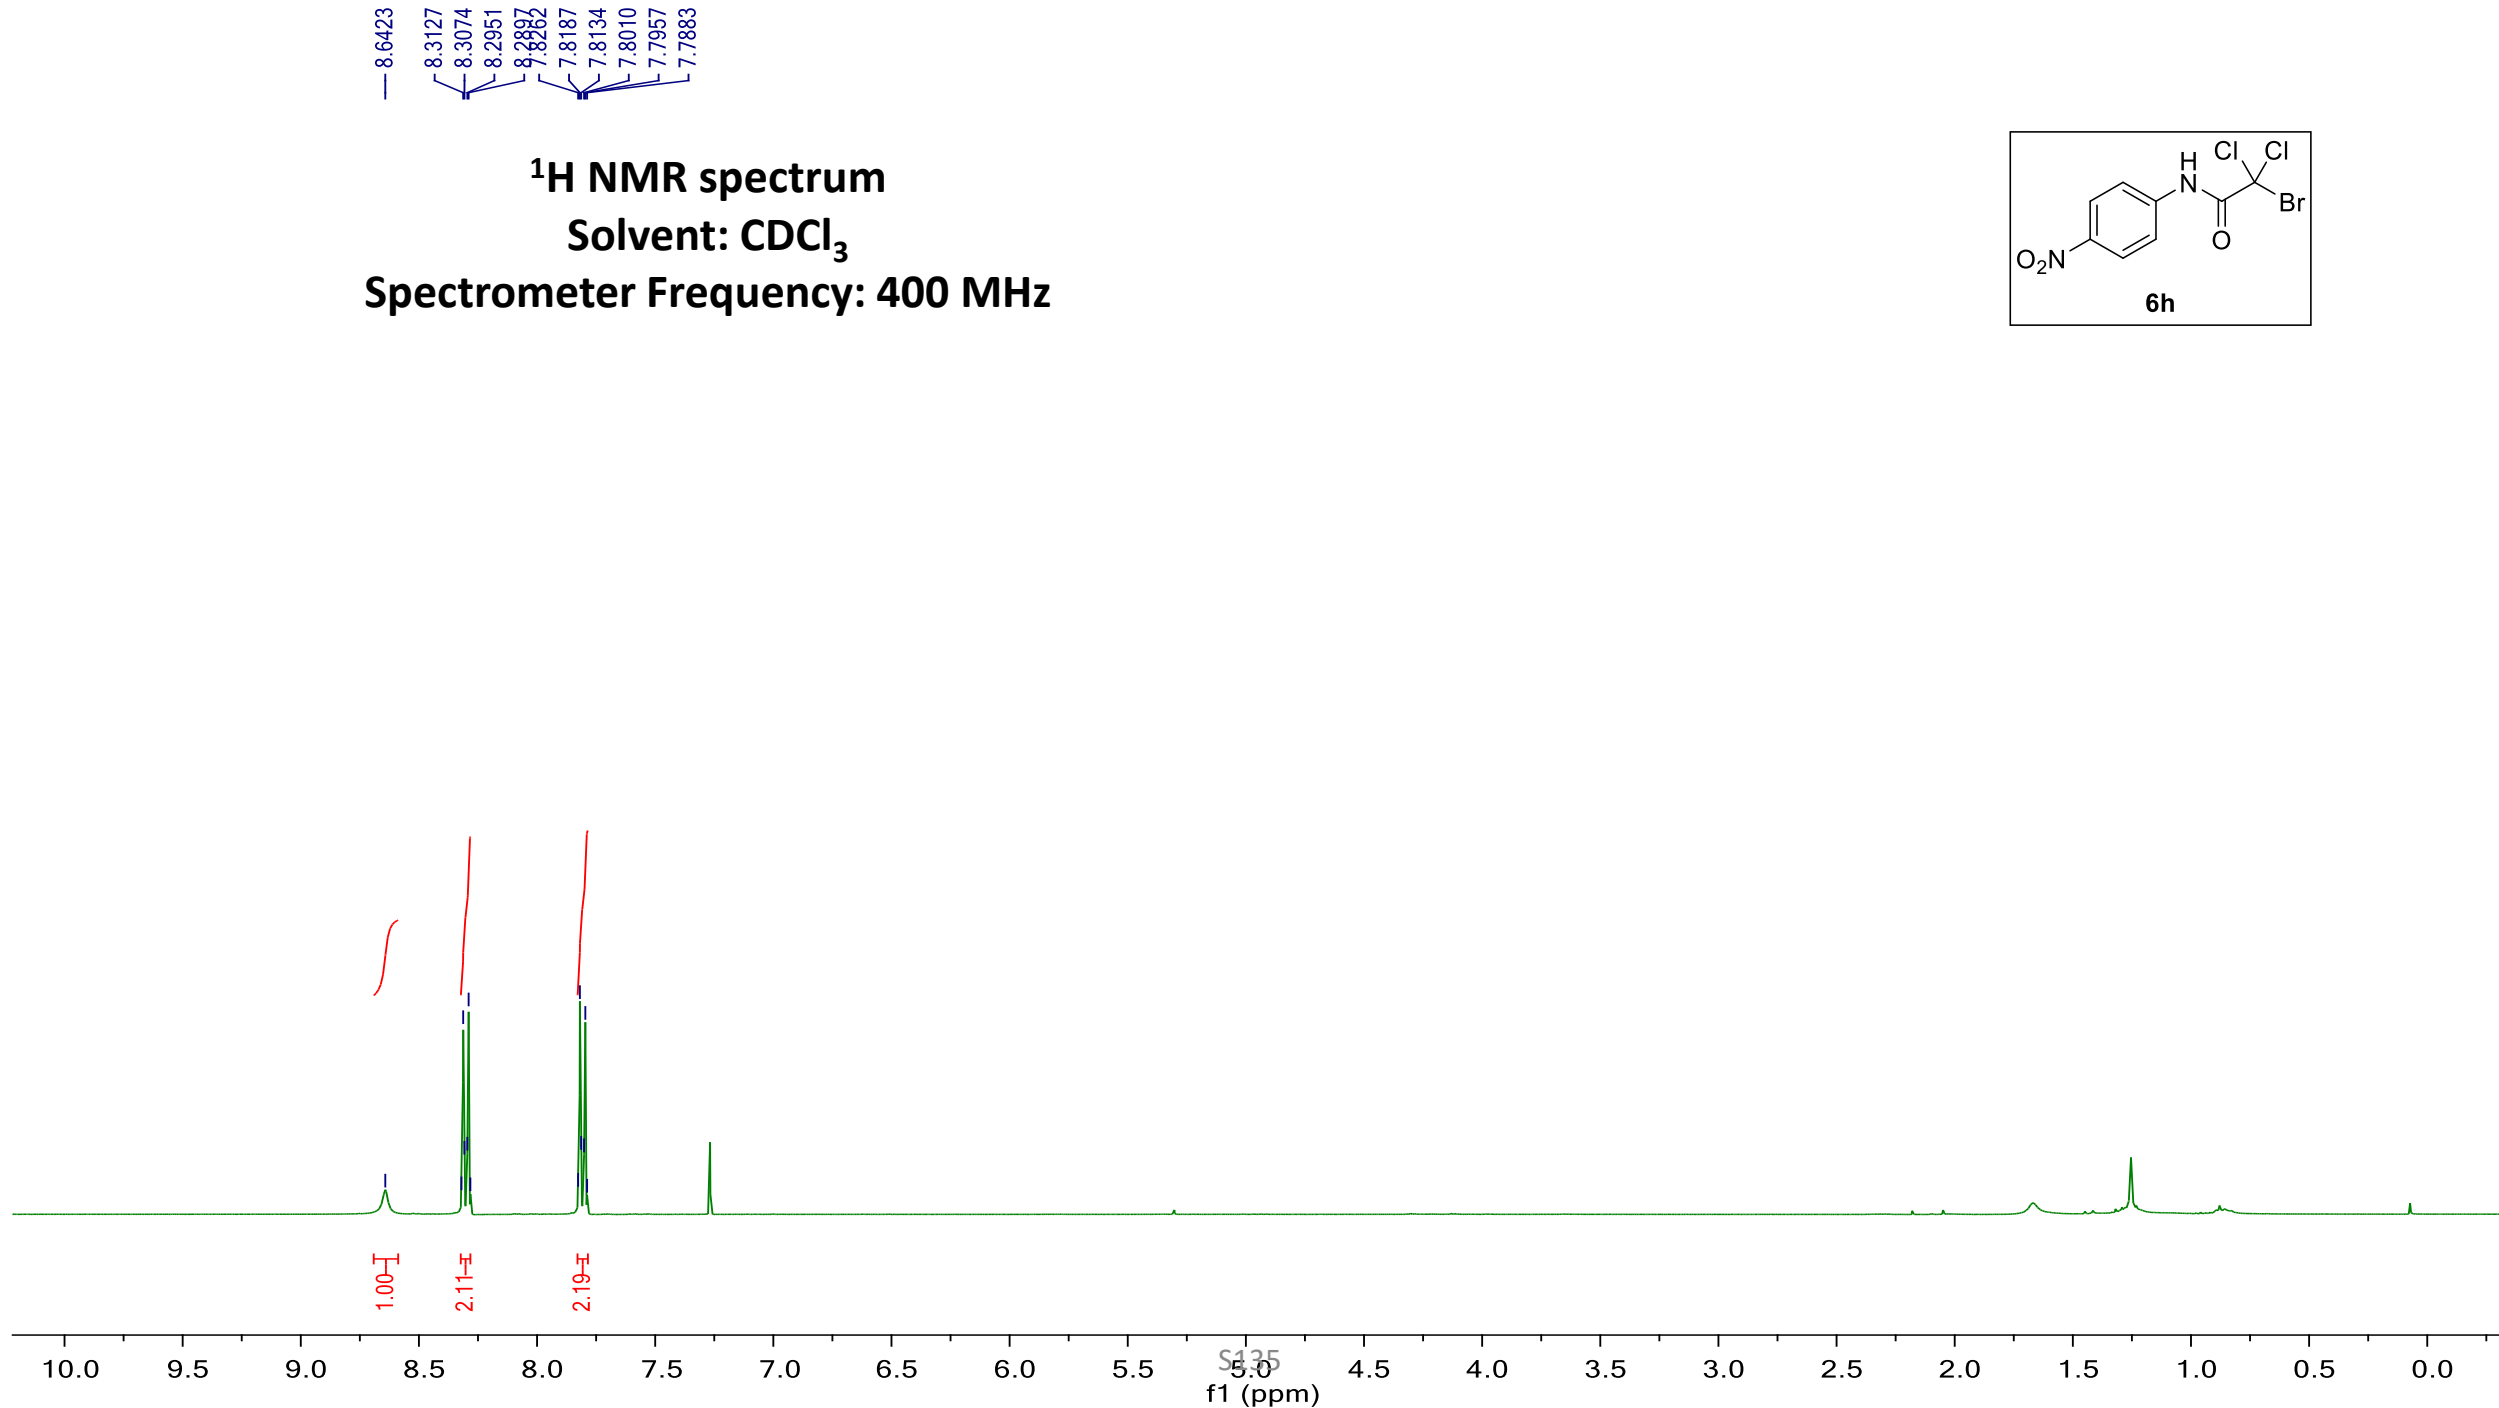

**$^{13}\text{C}$  { $^1\text{H}$ } NMR spectrum**  
**Solvent:  $\text{CDCl}_3$**   
**Spectrometer Frequency: 100 MHz**

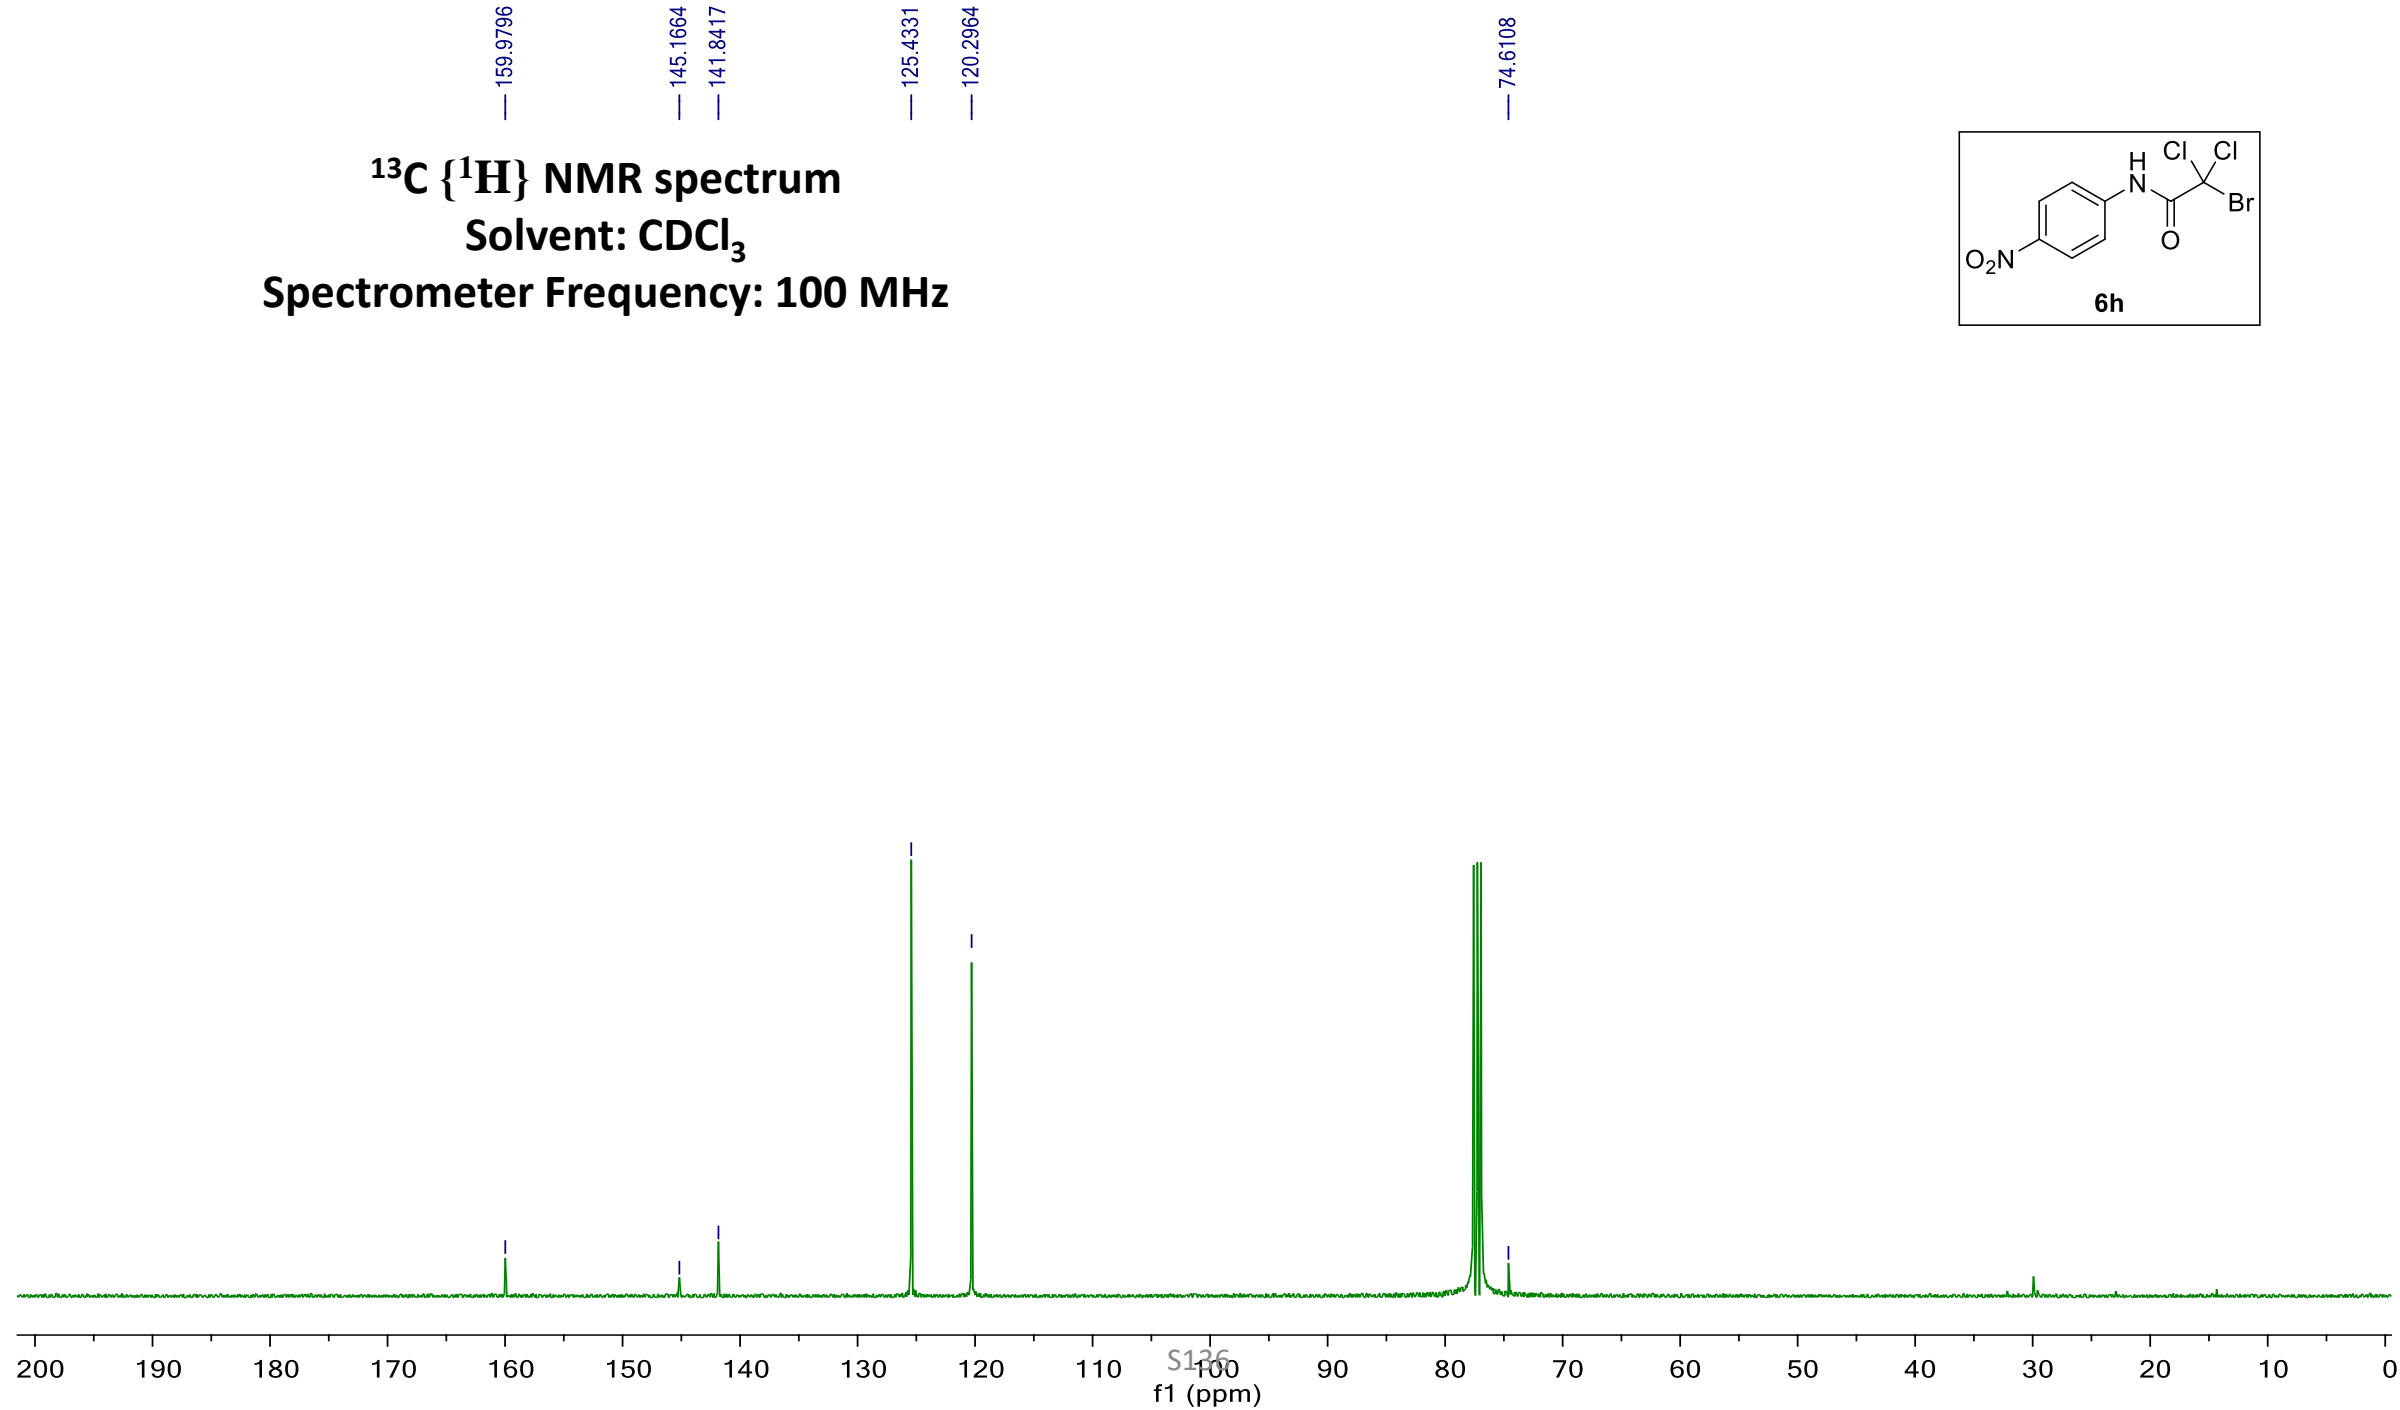

**$^1\text{H}$  NMR spectrum**  
**Solvent:  $\text{CDCl}_3$**   
**Spectrometer Frequency: 400 MHz**

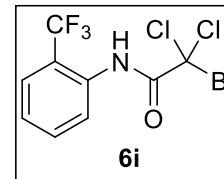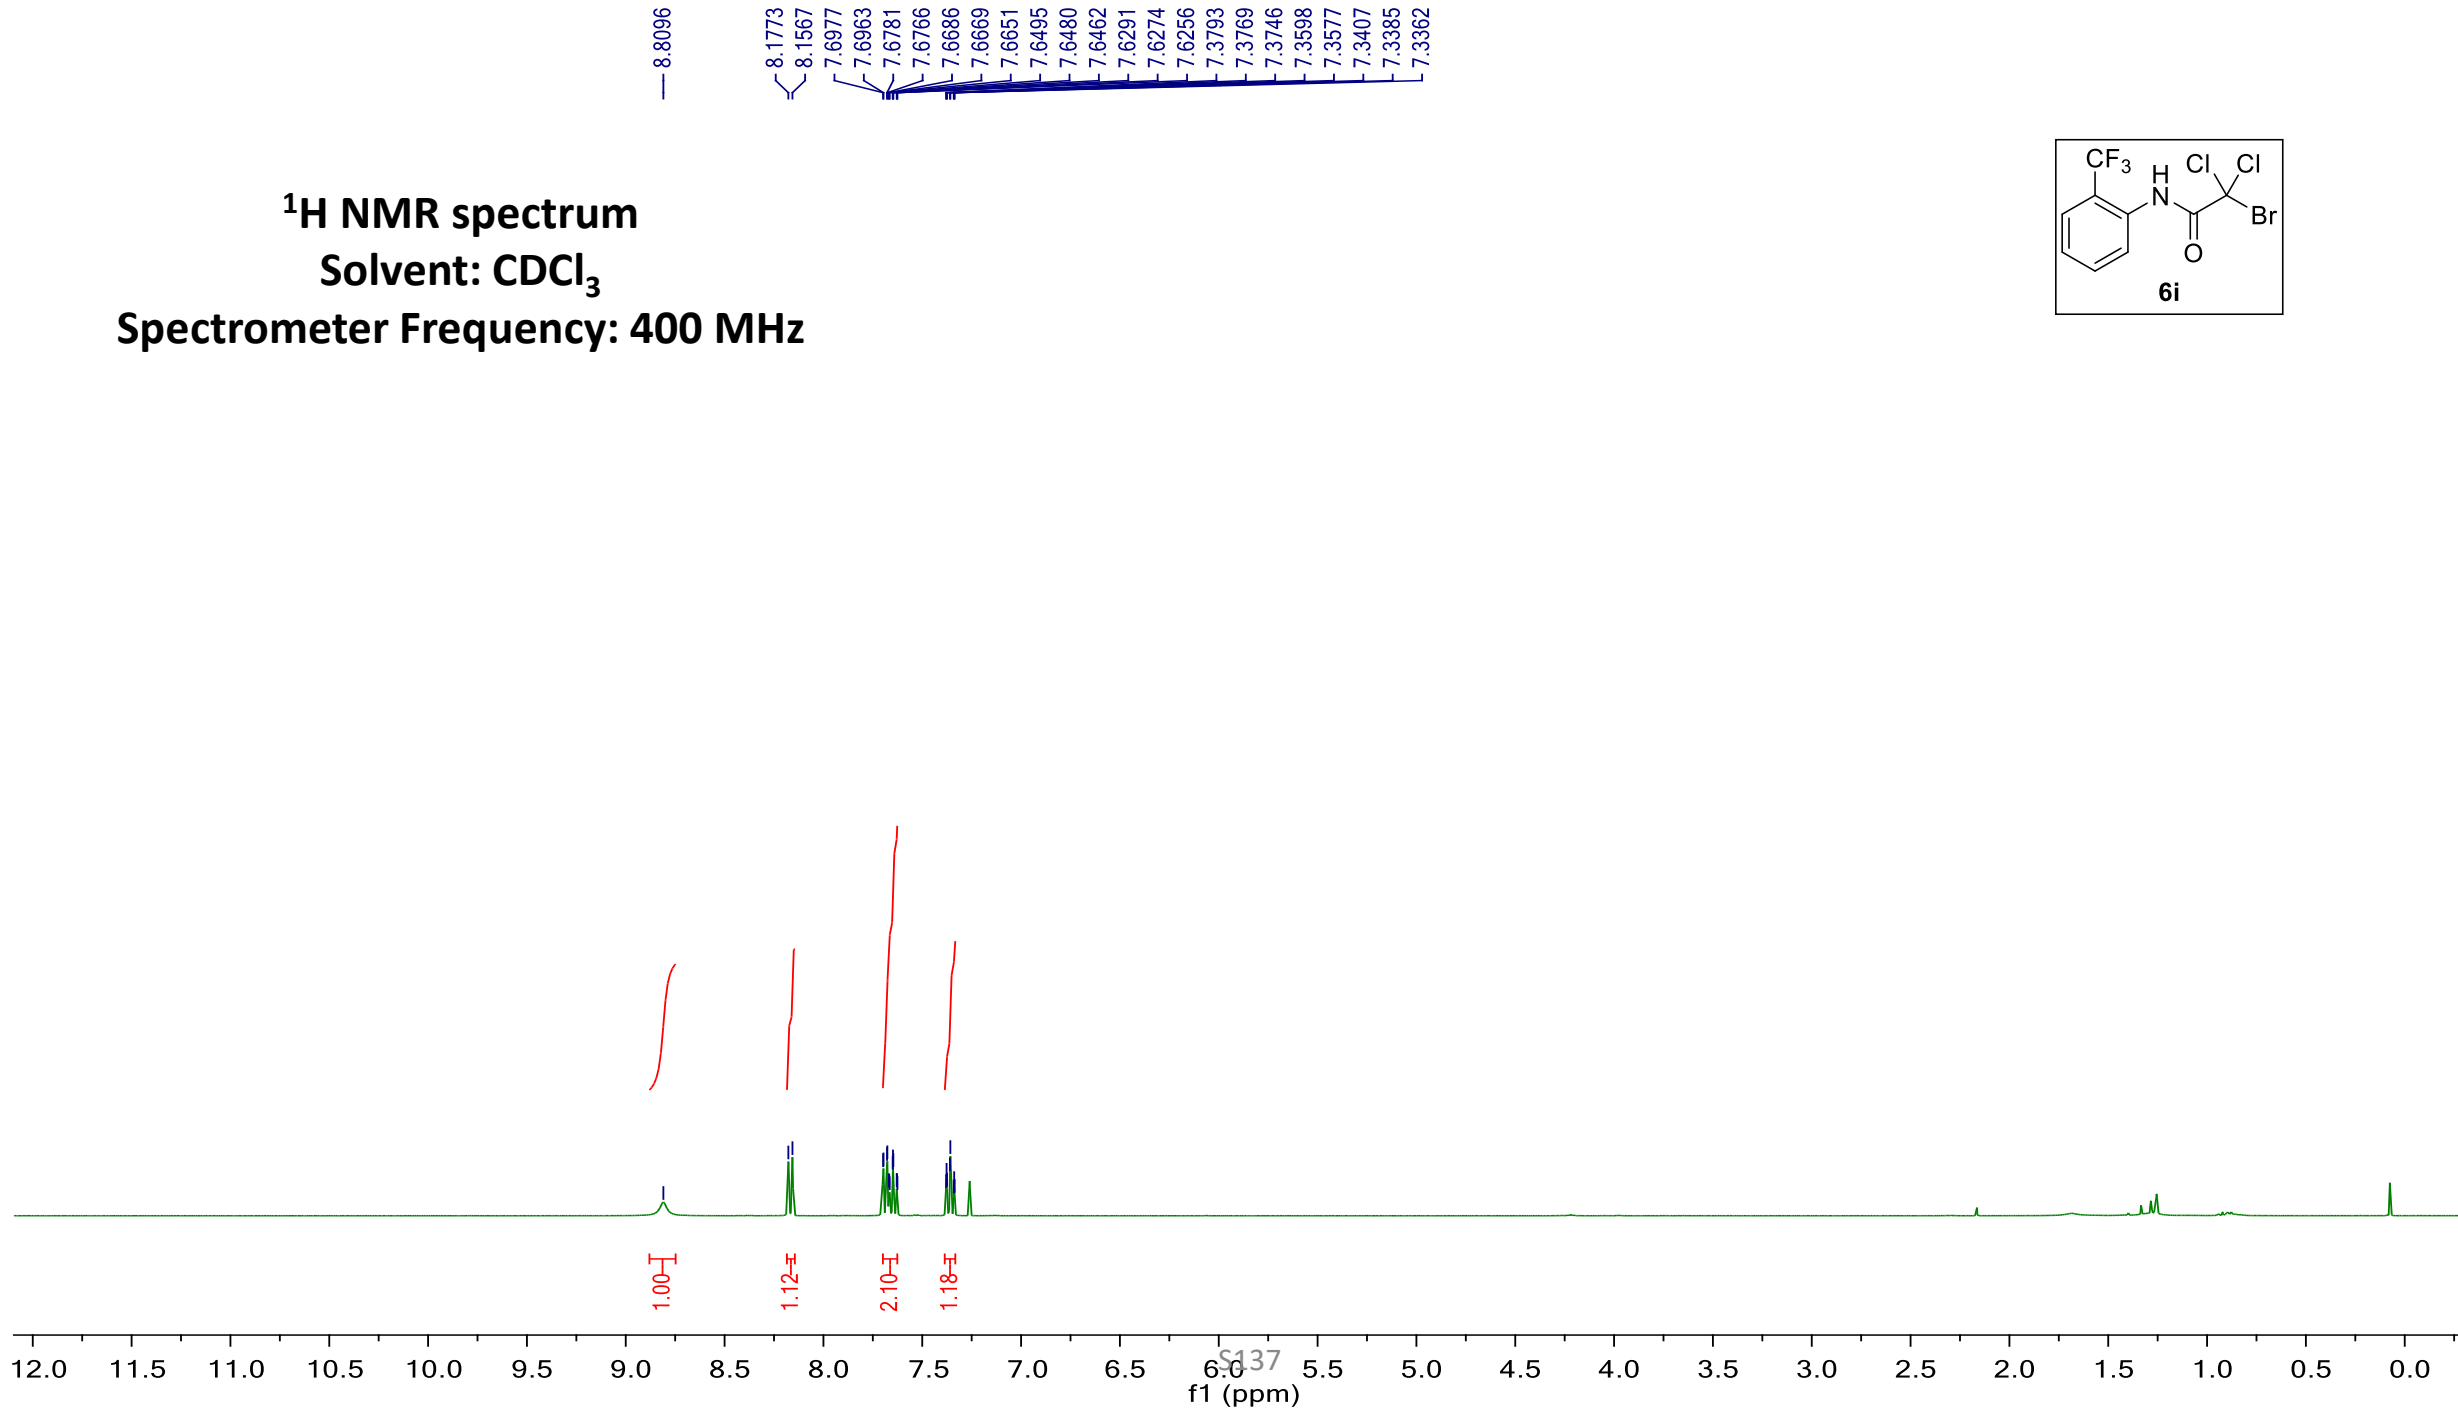

M0755-12  
AJ-II-2i

**$^{13}\text{C}$  { $^1\text{H}$ } NMR spectrum**  
**Solvent:  $\text{CDCl}_3$**   
**Spectrometer Frequency: 100 MHz**

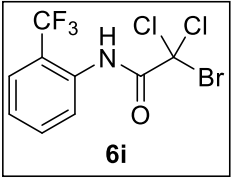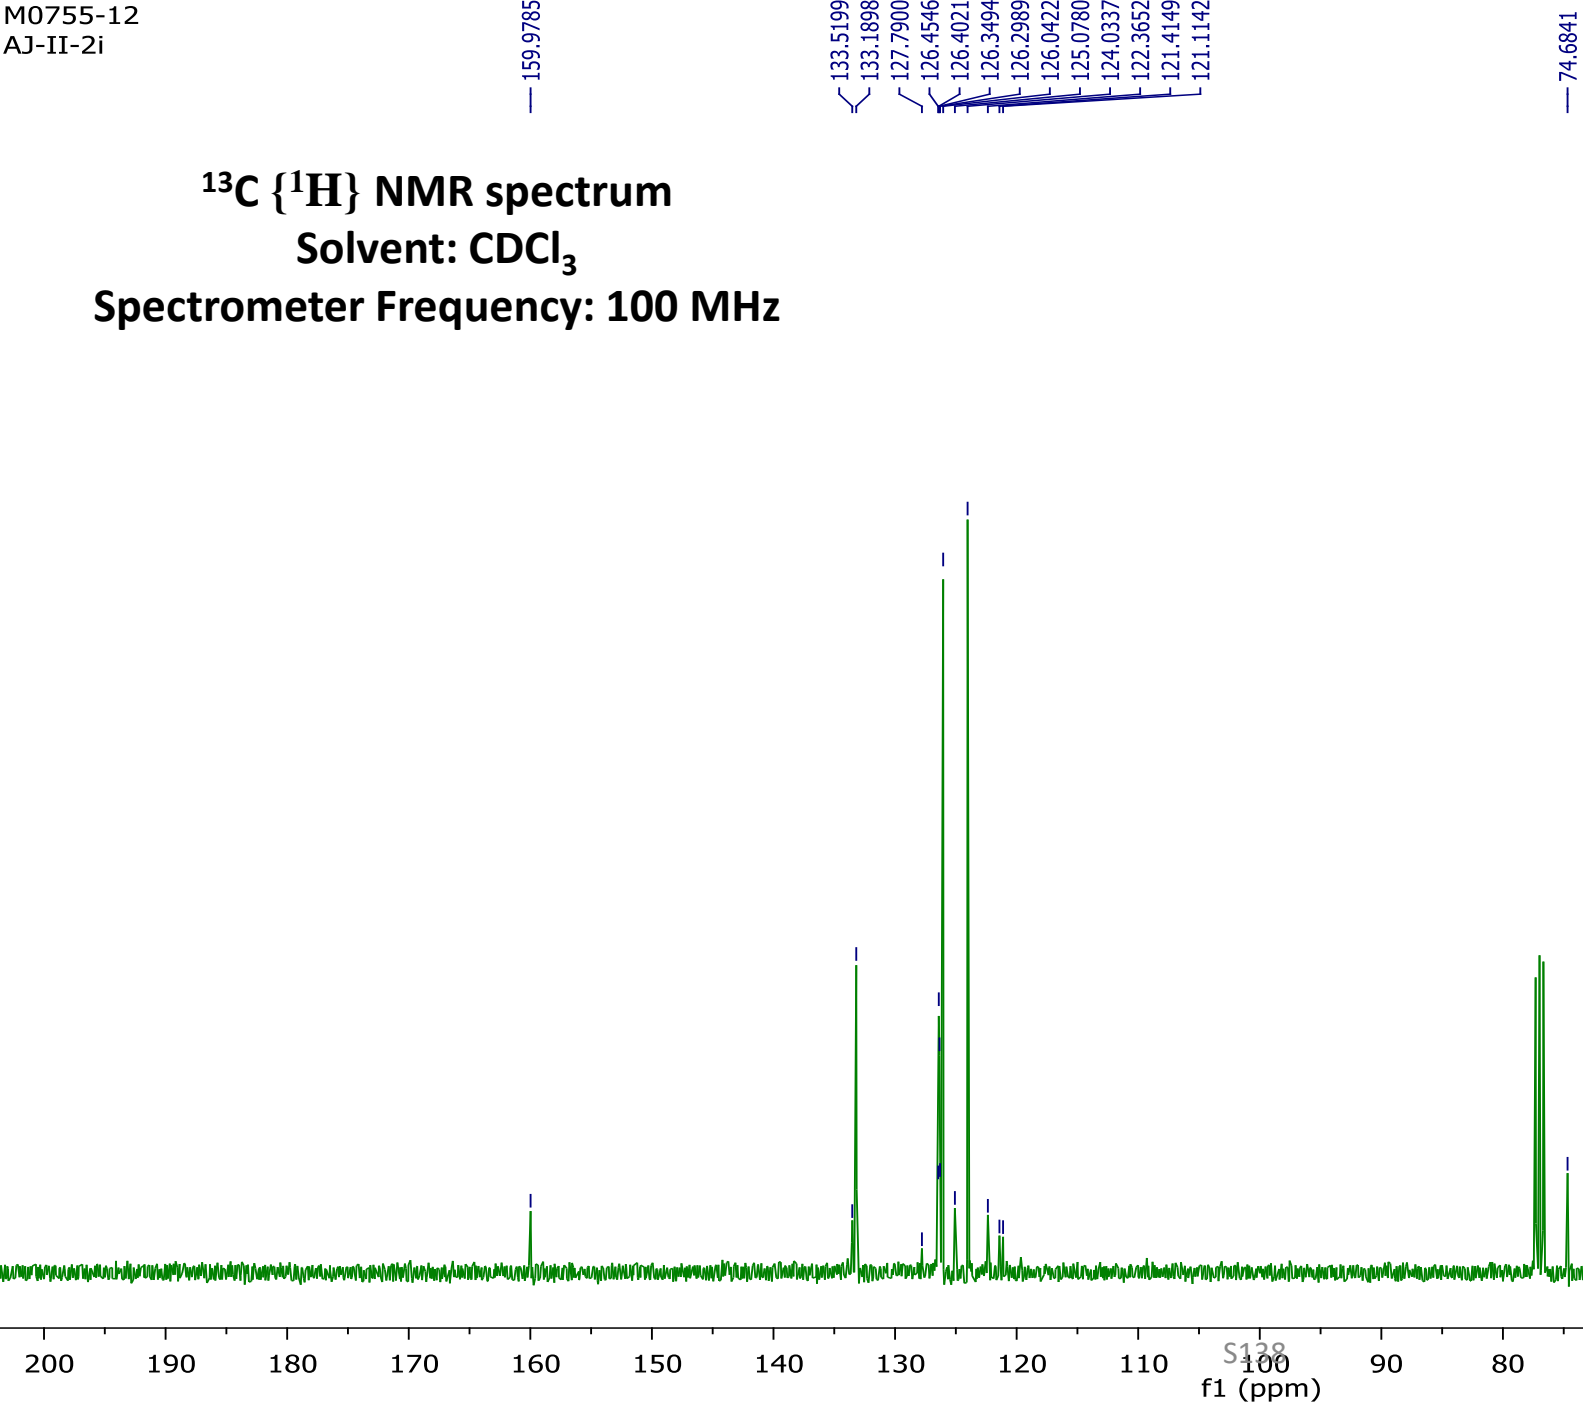

**$^{19}\text{F}\{^1\text{H}\}$  NMR spectrum**

**Solvent:  $\text{CDCl}_3$**

**Spectrometer Frequency: 376 MHz**

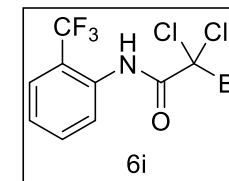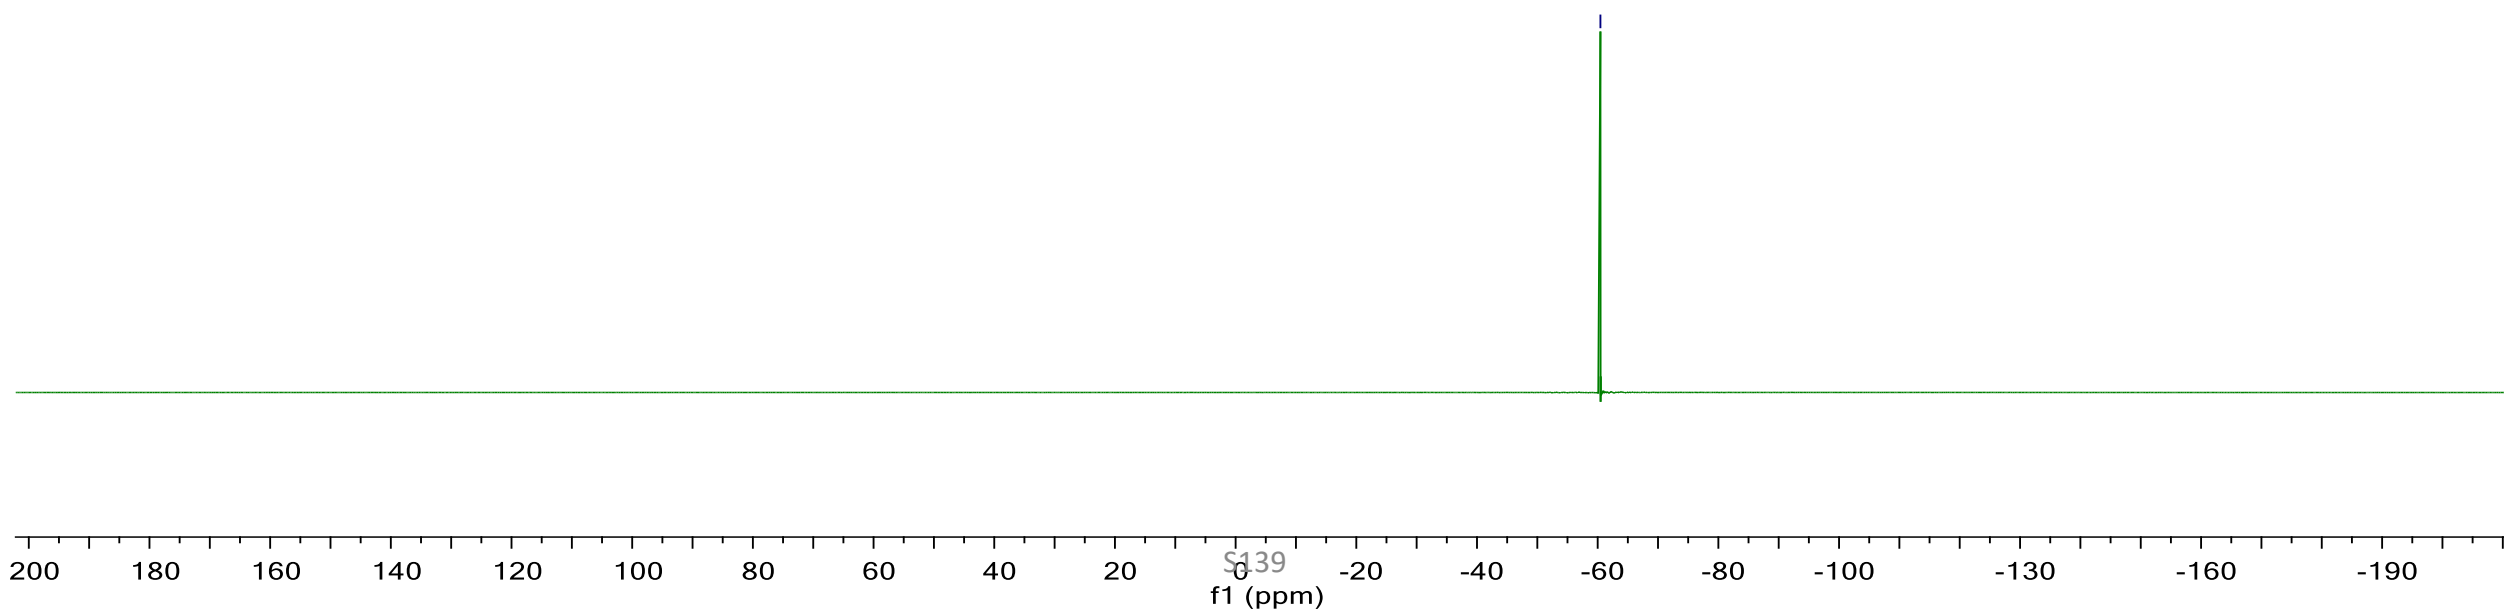

# <sup>1</sup>H NMR spectrum

Solvent: CDCl<sub>3</sub>

Spectrometer Frequency: 400 MHz

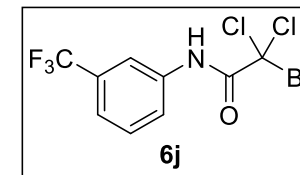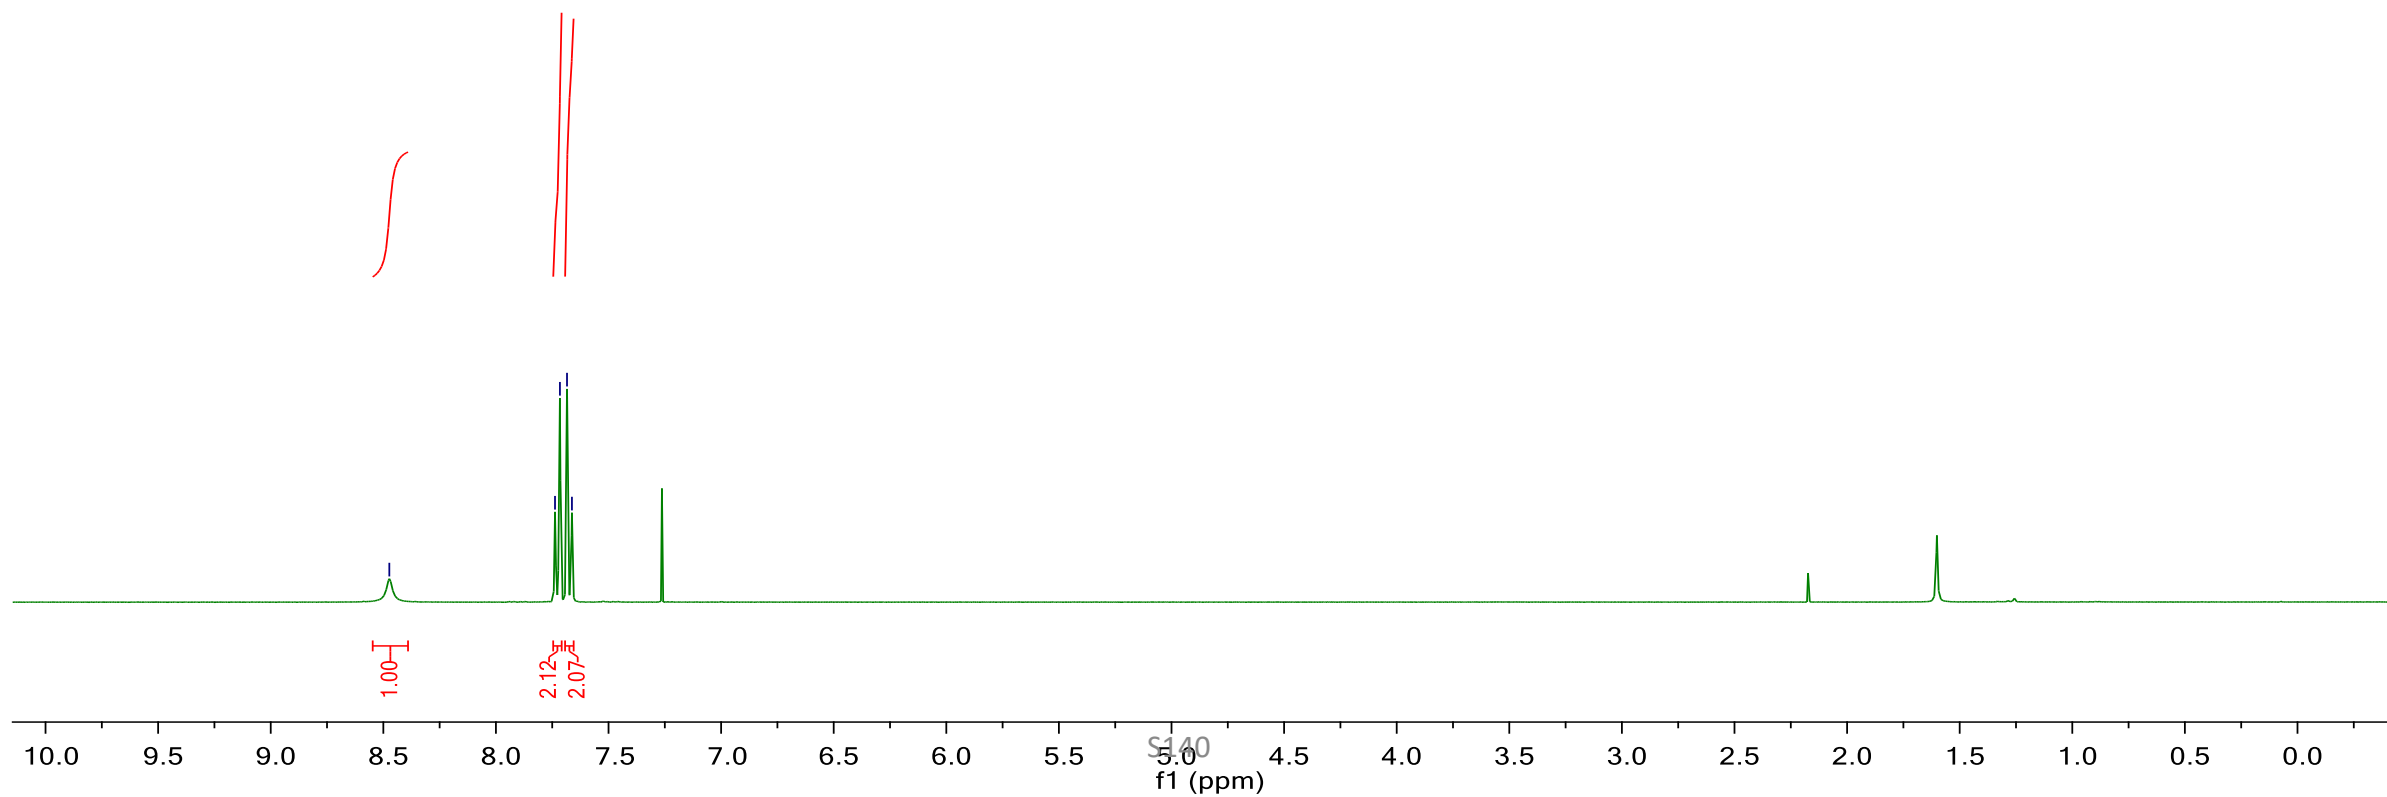

M0755-14  
AJ-II-2j

**$^{13}\text{C}$   $\{^1\text{H}\}$  NMR spectrum**  
**Solvent:  $\text{CDCl}_3$**   
**Spectrometer Frequency: 100 MHz**

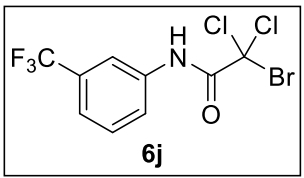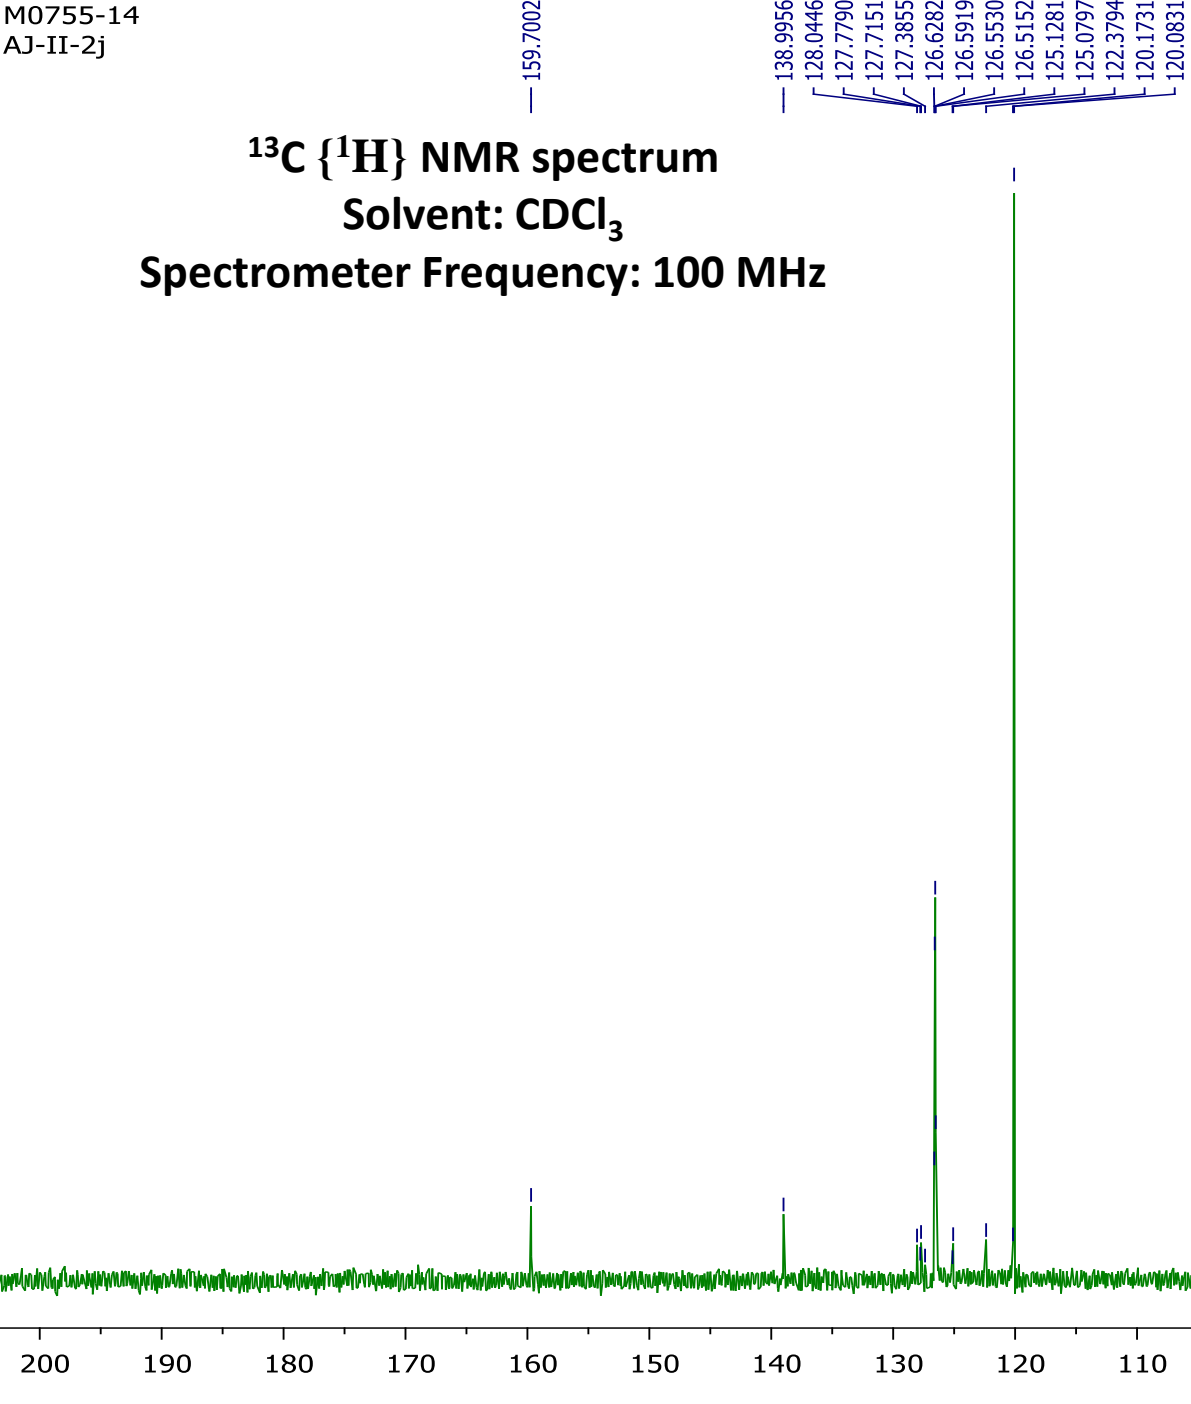

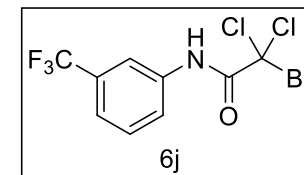

$^{19}\text{F}\{^1\text{H}\}$  NMR spectrum

Solvent:  $\text{CDCl}_3$

Spectrometer Frequency: 376 MHz

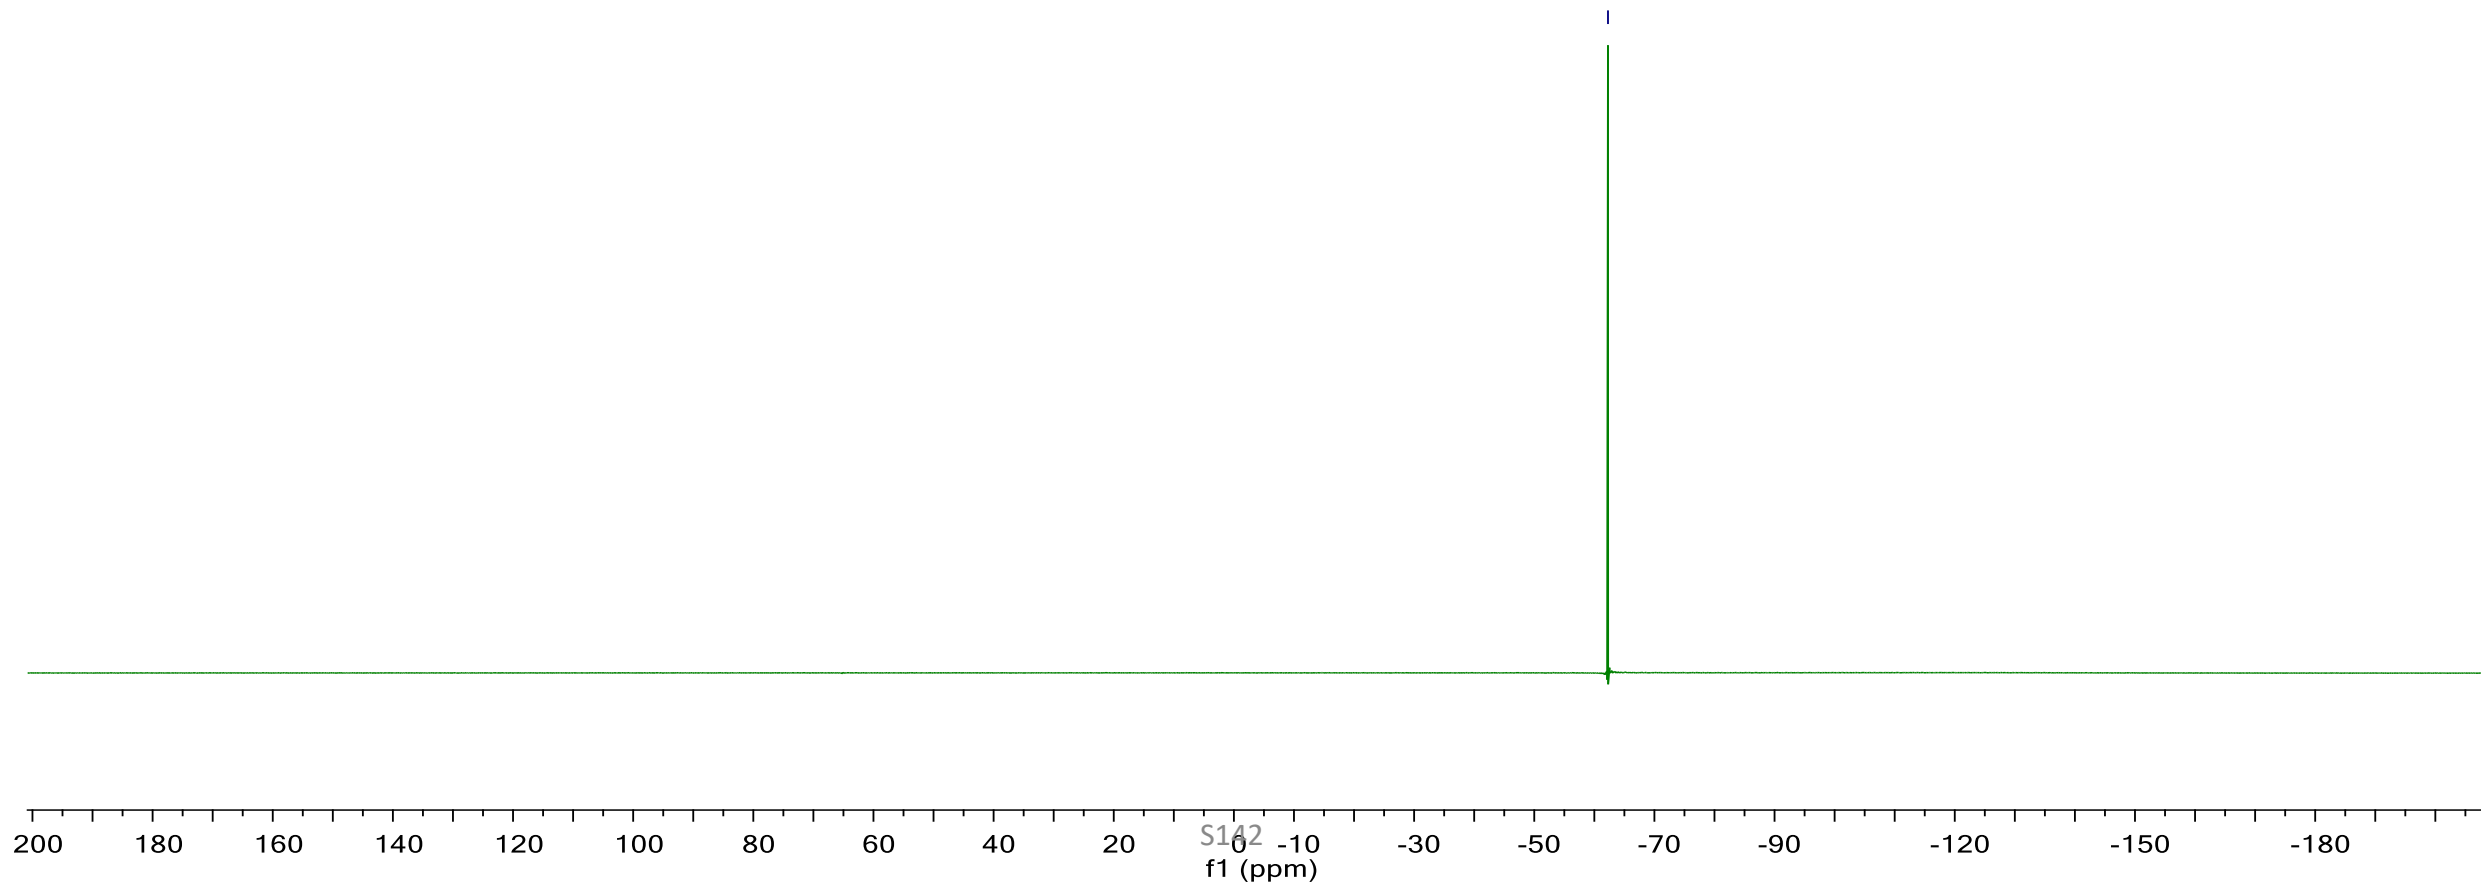

**$^1\text{H}$  NMR spectrum**  
**Solvent:  $\text{DMSO-}d_6$**   
**Spectrometer Frequency: 600 MHz**

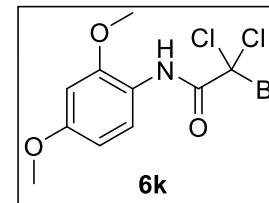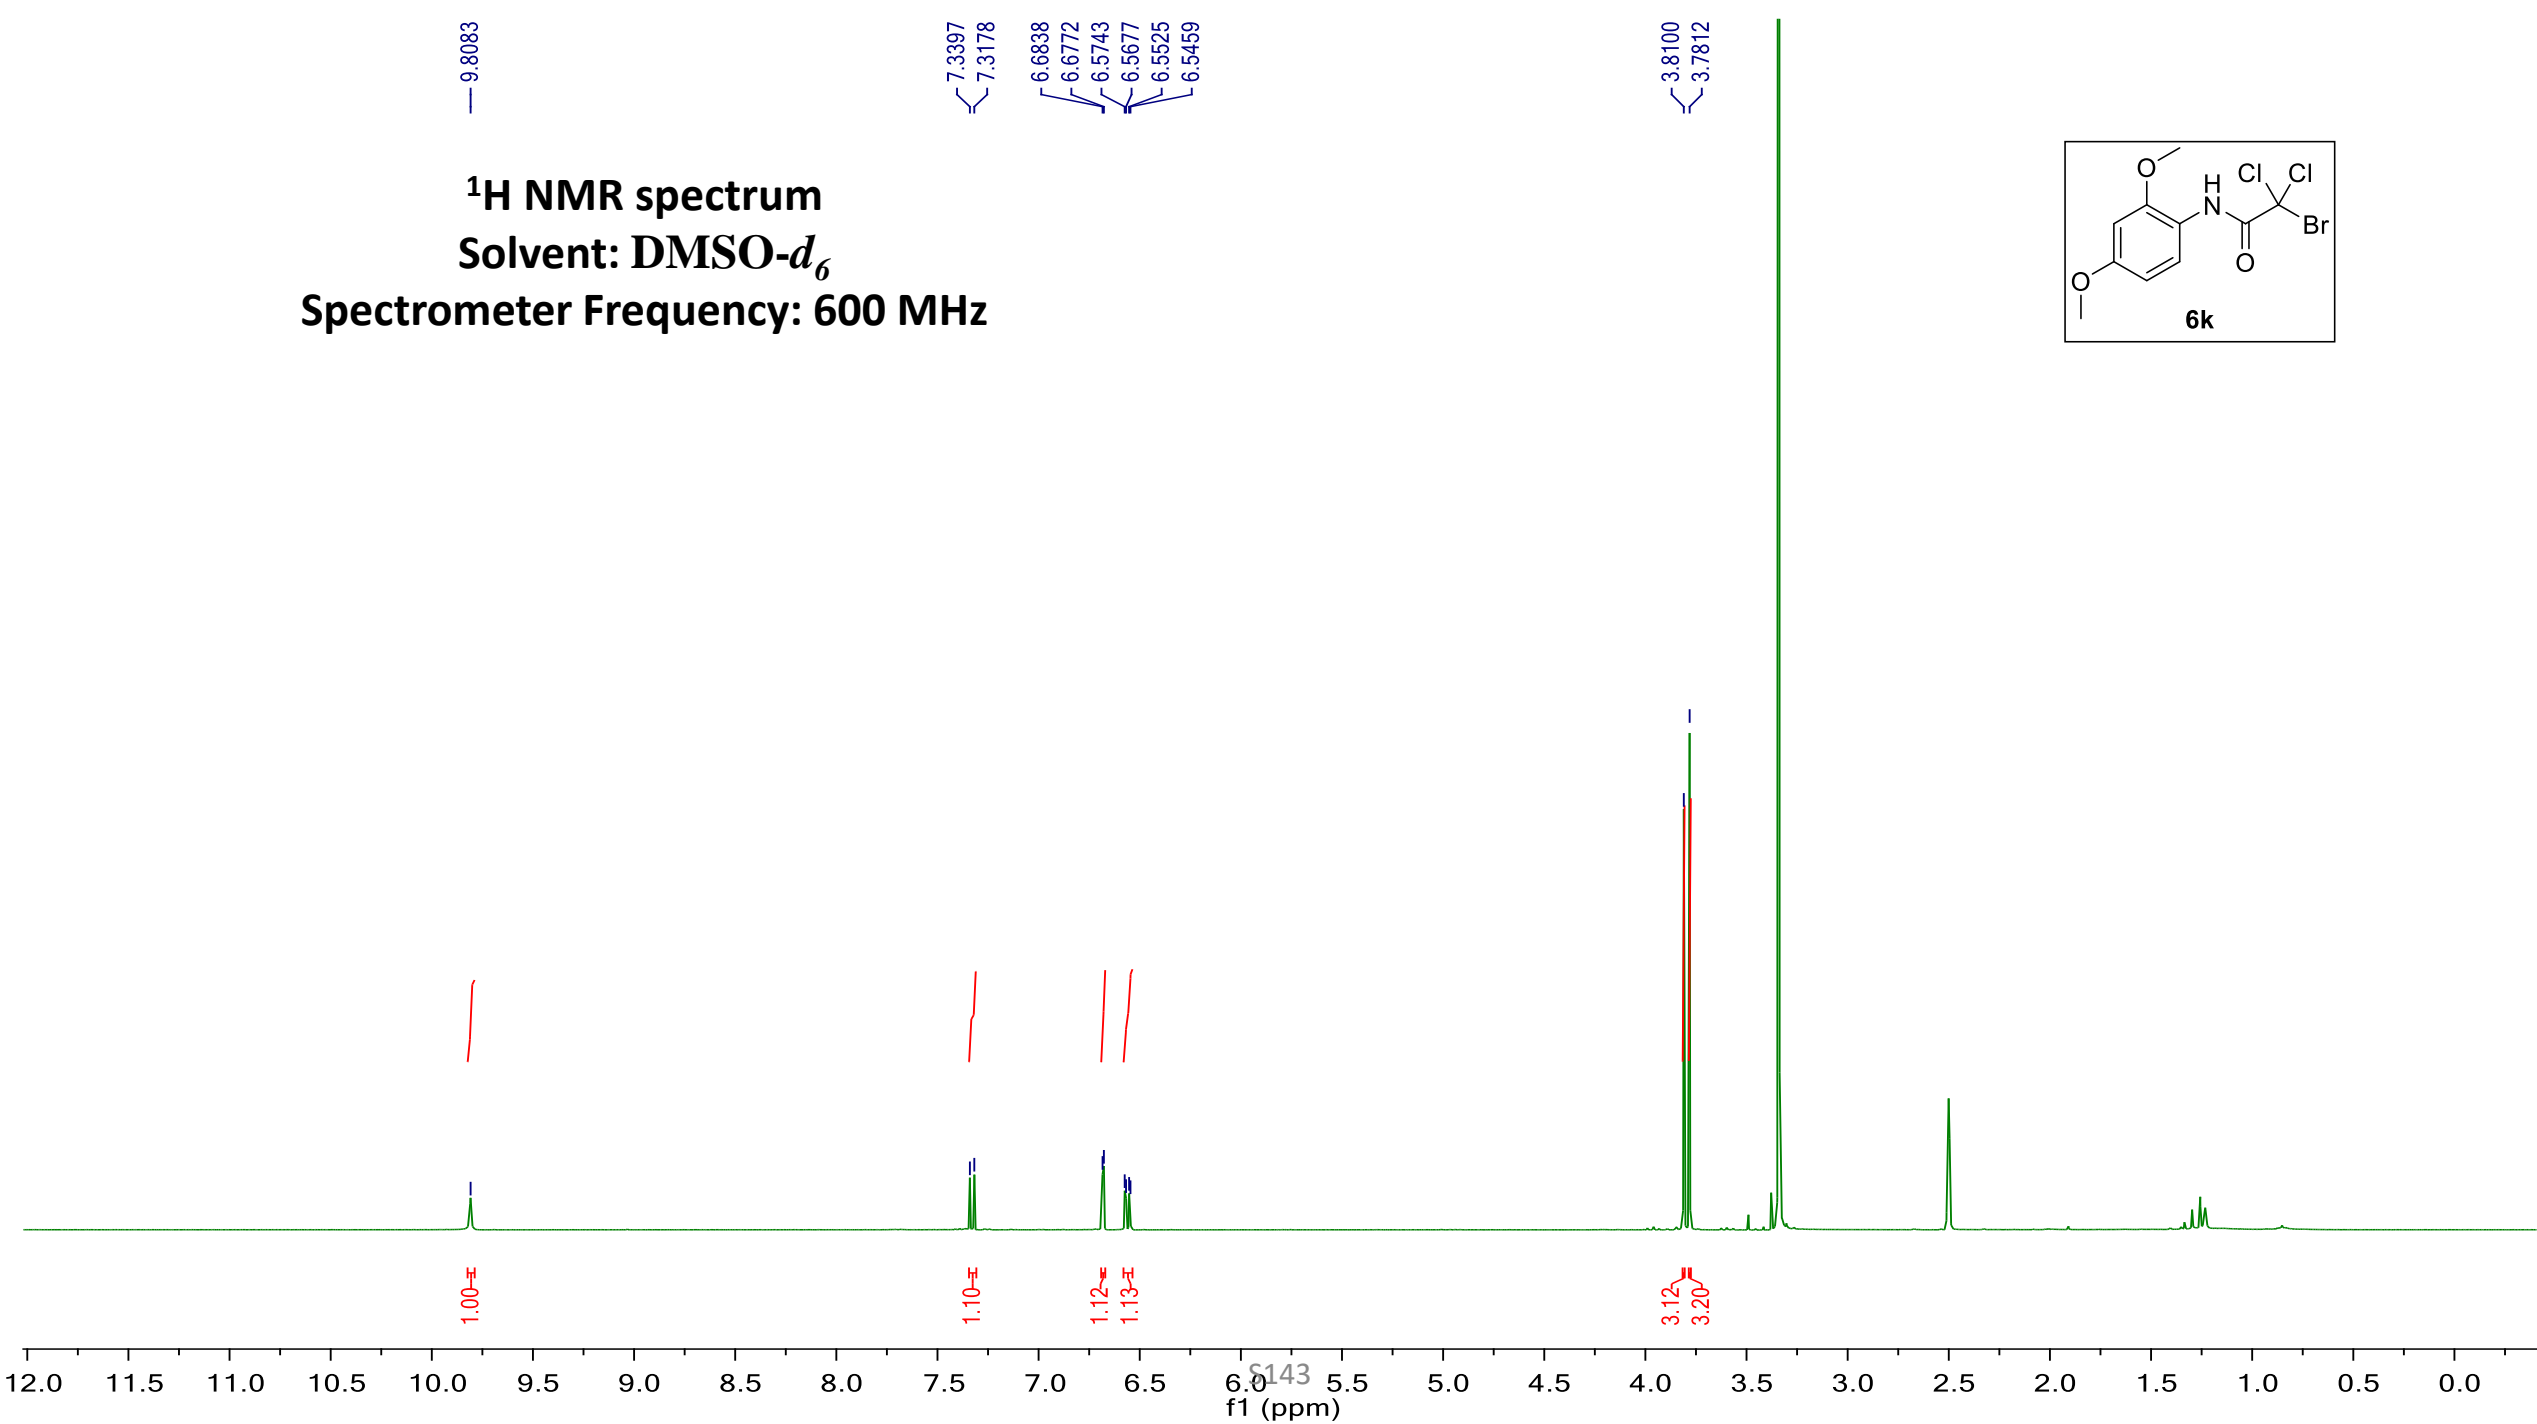

**$^{13}\text{C}$   $\{^1\text{H}\}$  NMR spectrum**  
**Solvent: DMSO- $d_6$**   
**Spectrometer Frequency: 151 MHz**

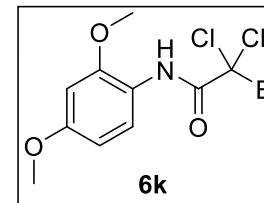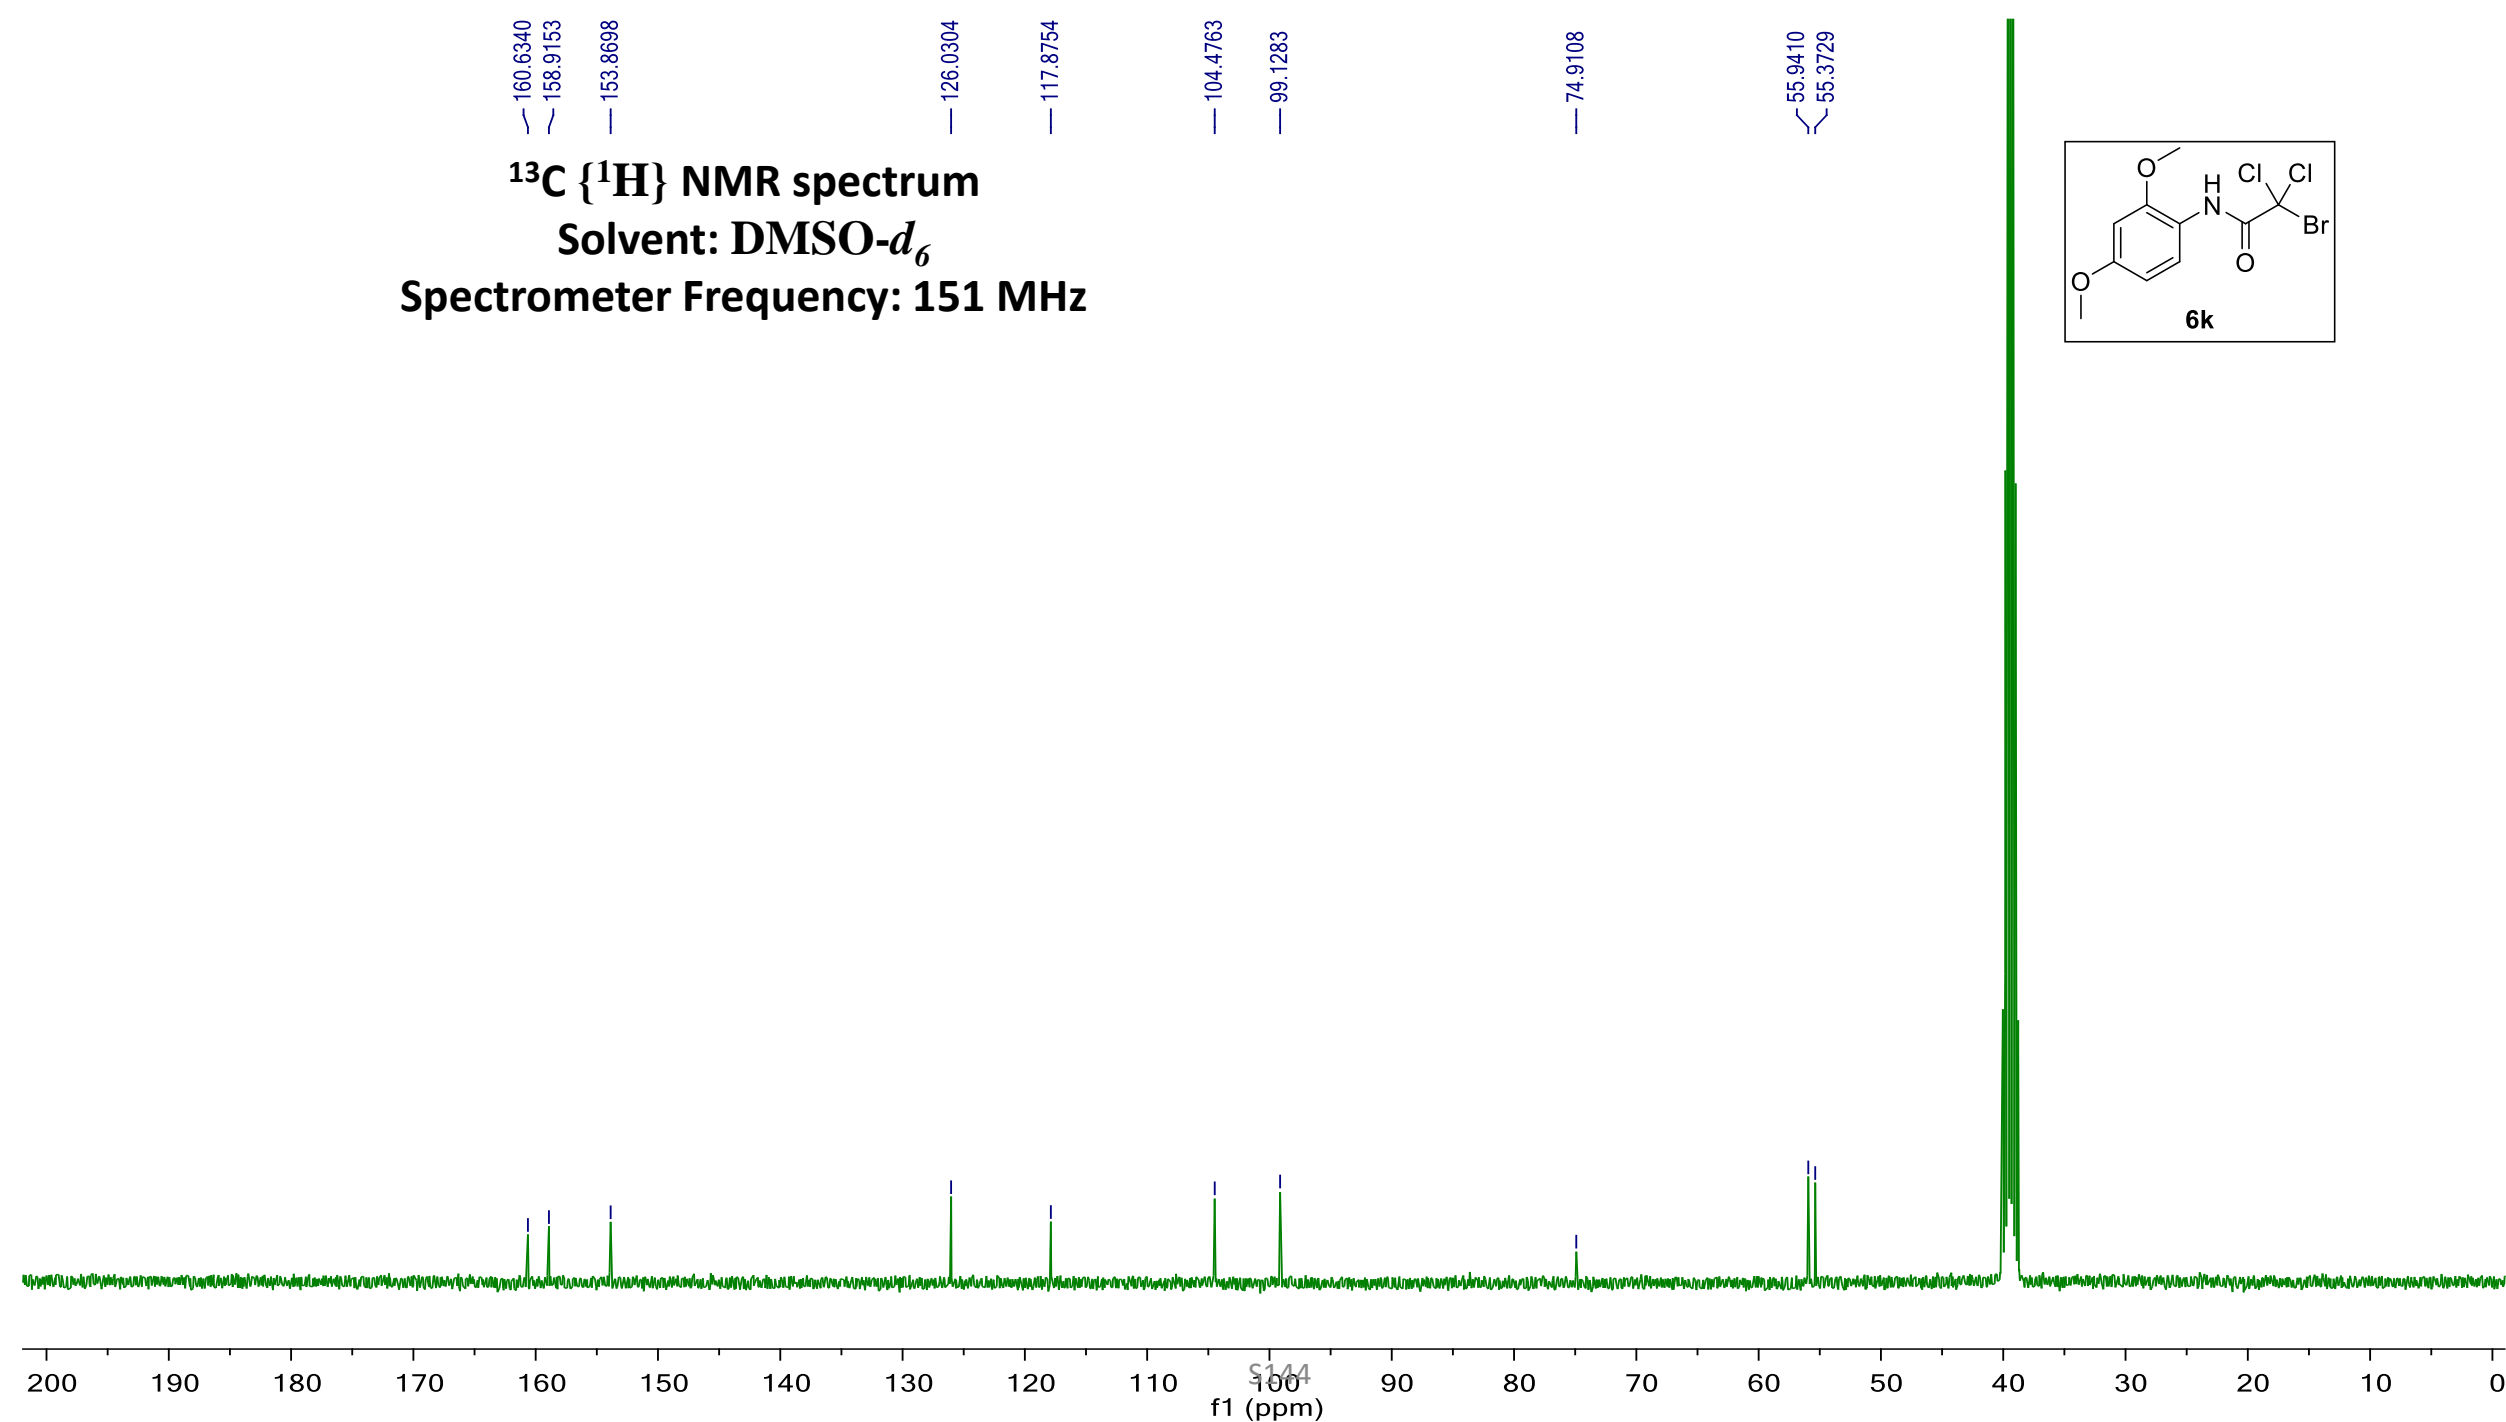

**$^1\text{H}$  NMR spectrum**  
**Solvent:  $\text{CDCl}_3$**   
**Spectrometer Frequency: 400 MHz**

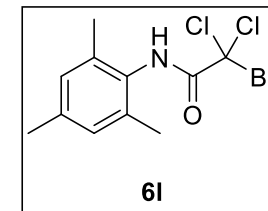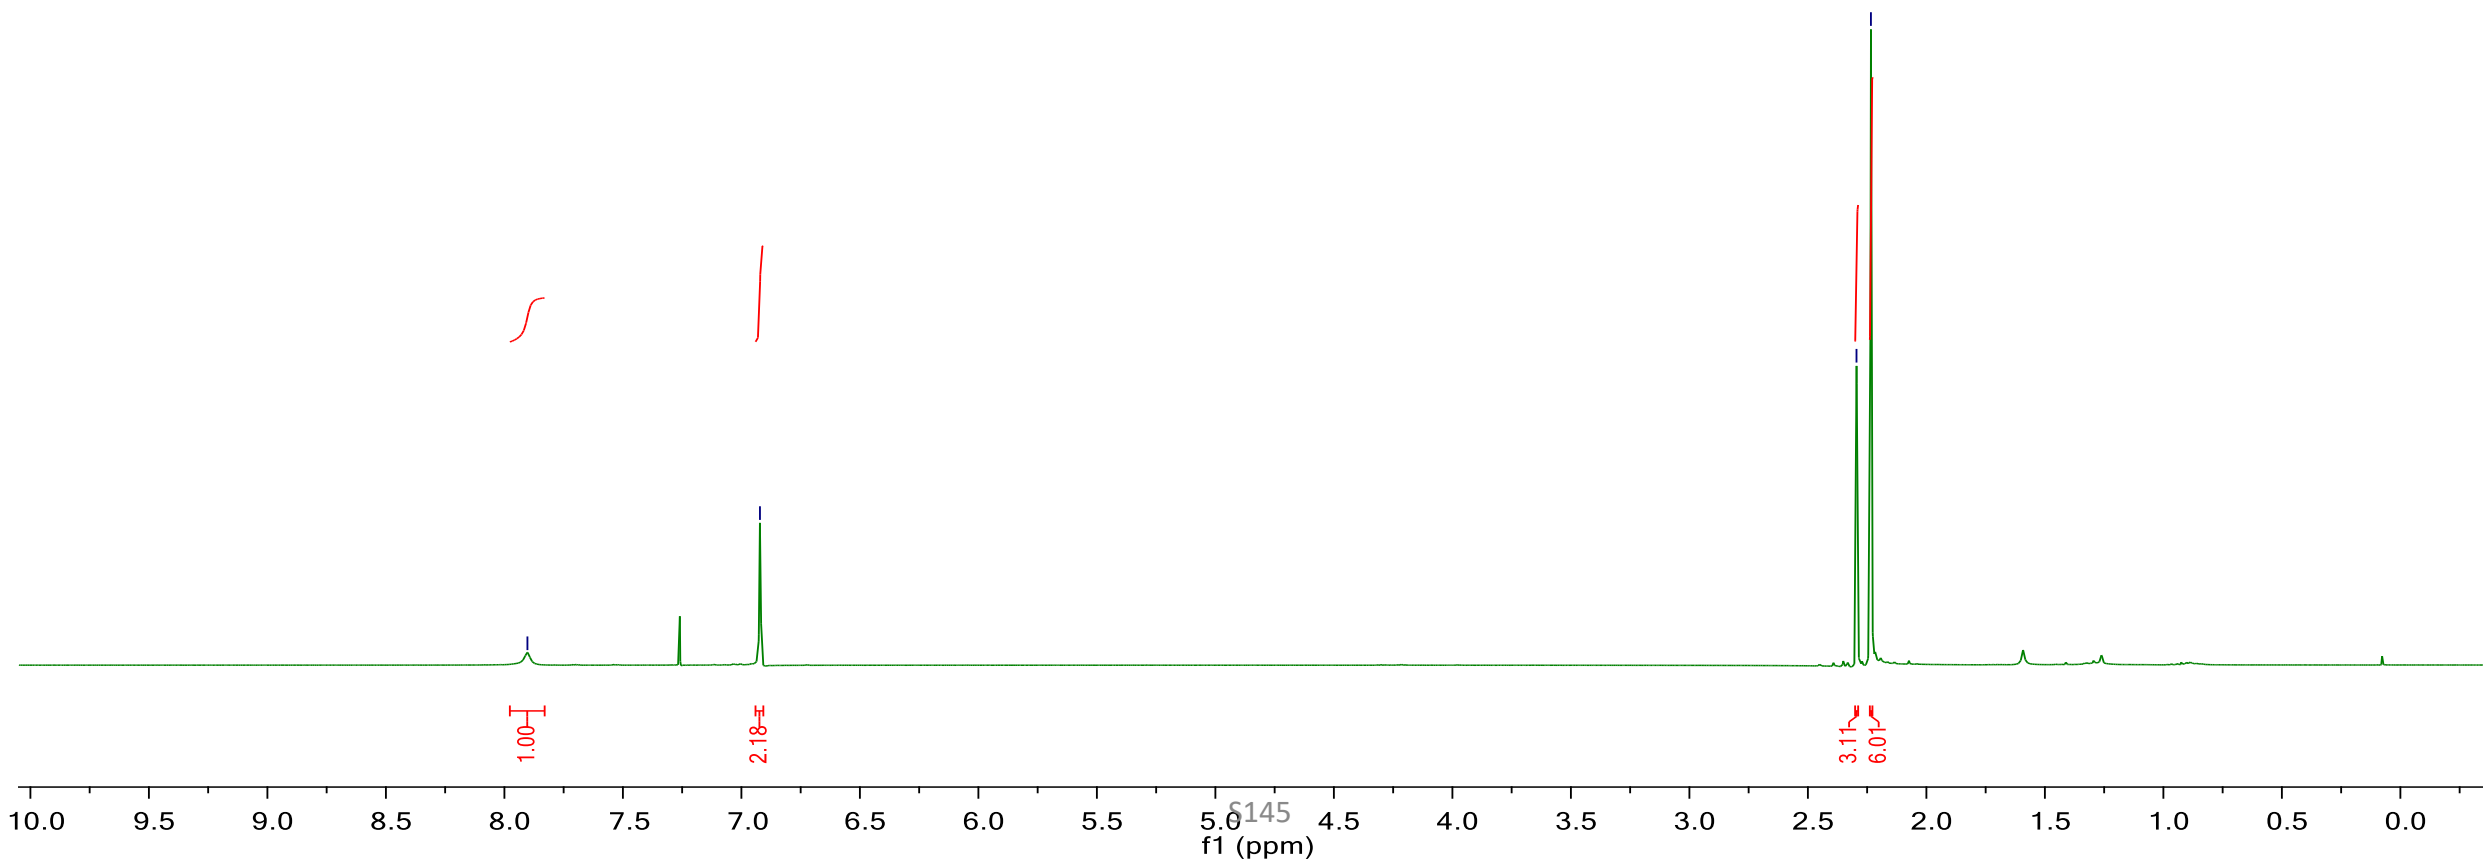

**$^{13}\text{C}$  { $^1\text{H}$ } NMR spectrum**  
**Solvent:  $\text{CDCl}_3$**   
**Spectrometer Frequency: 100 MHz**

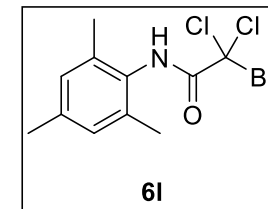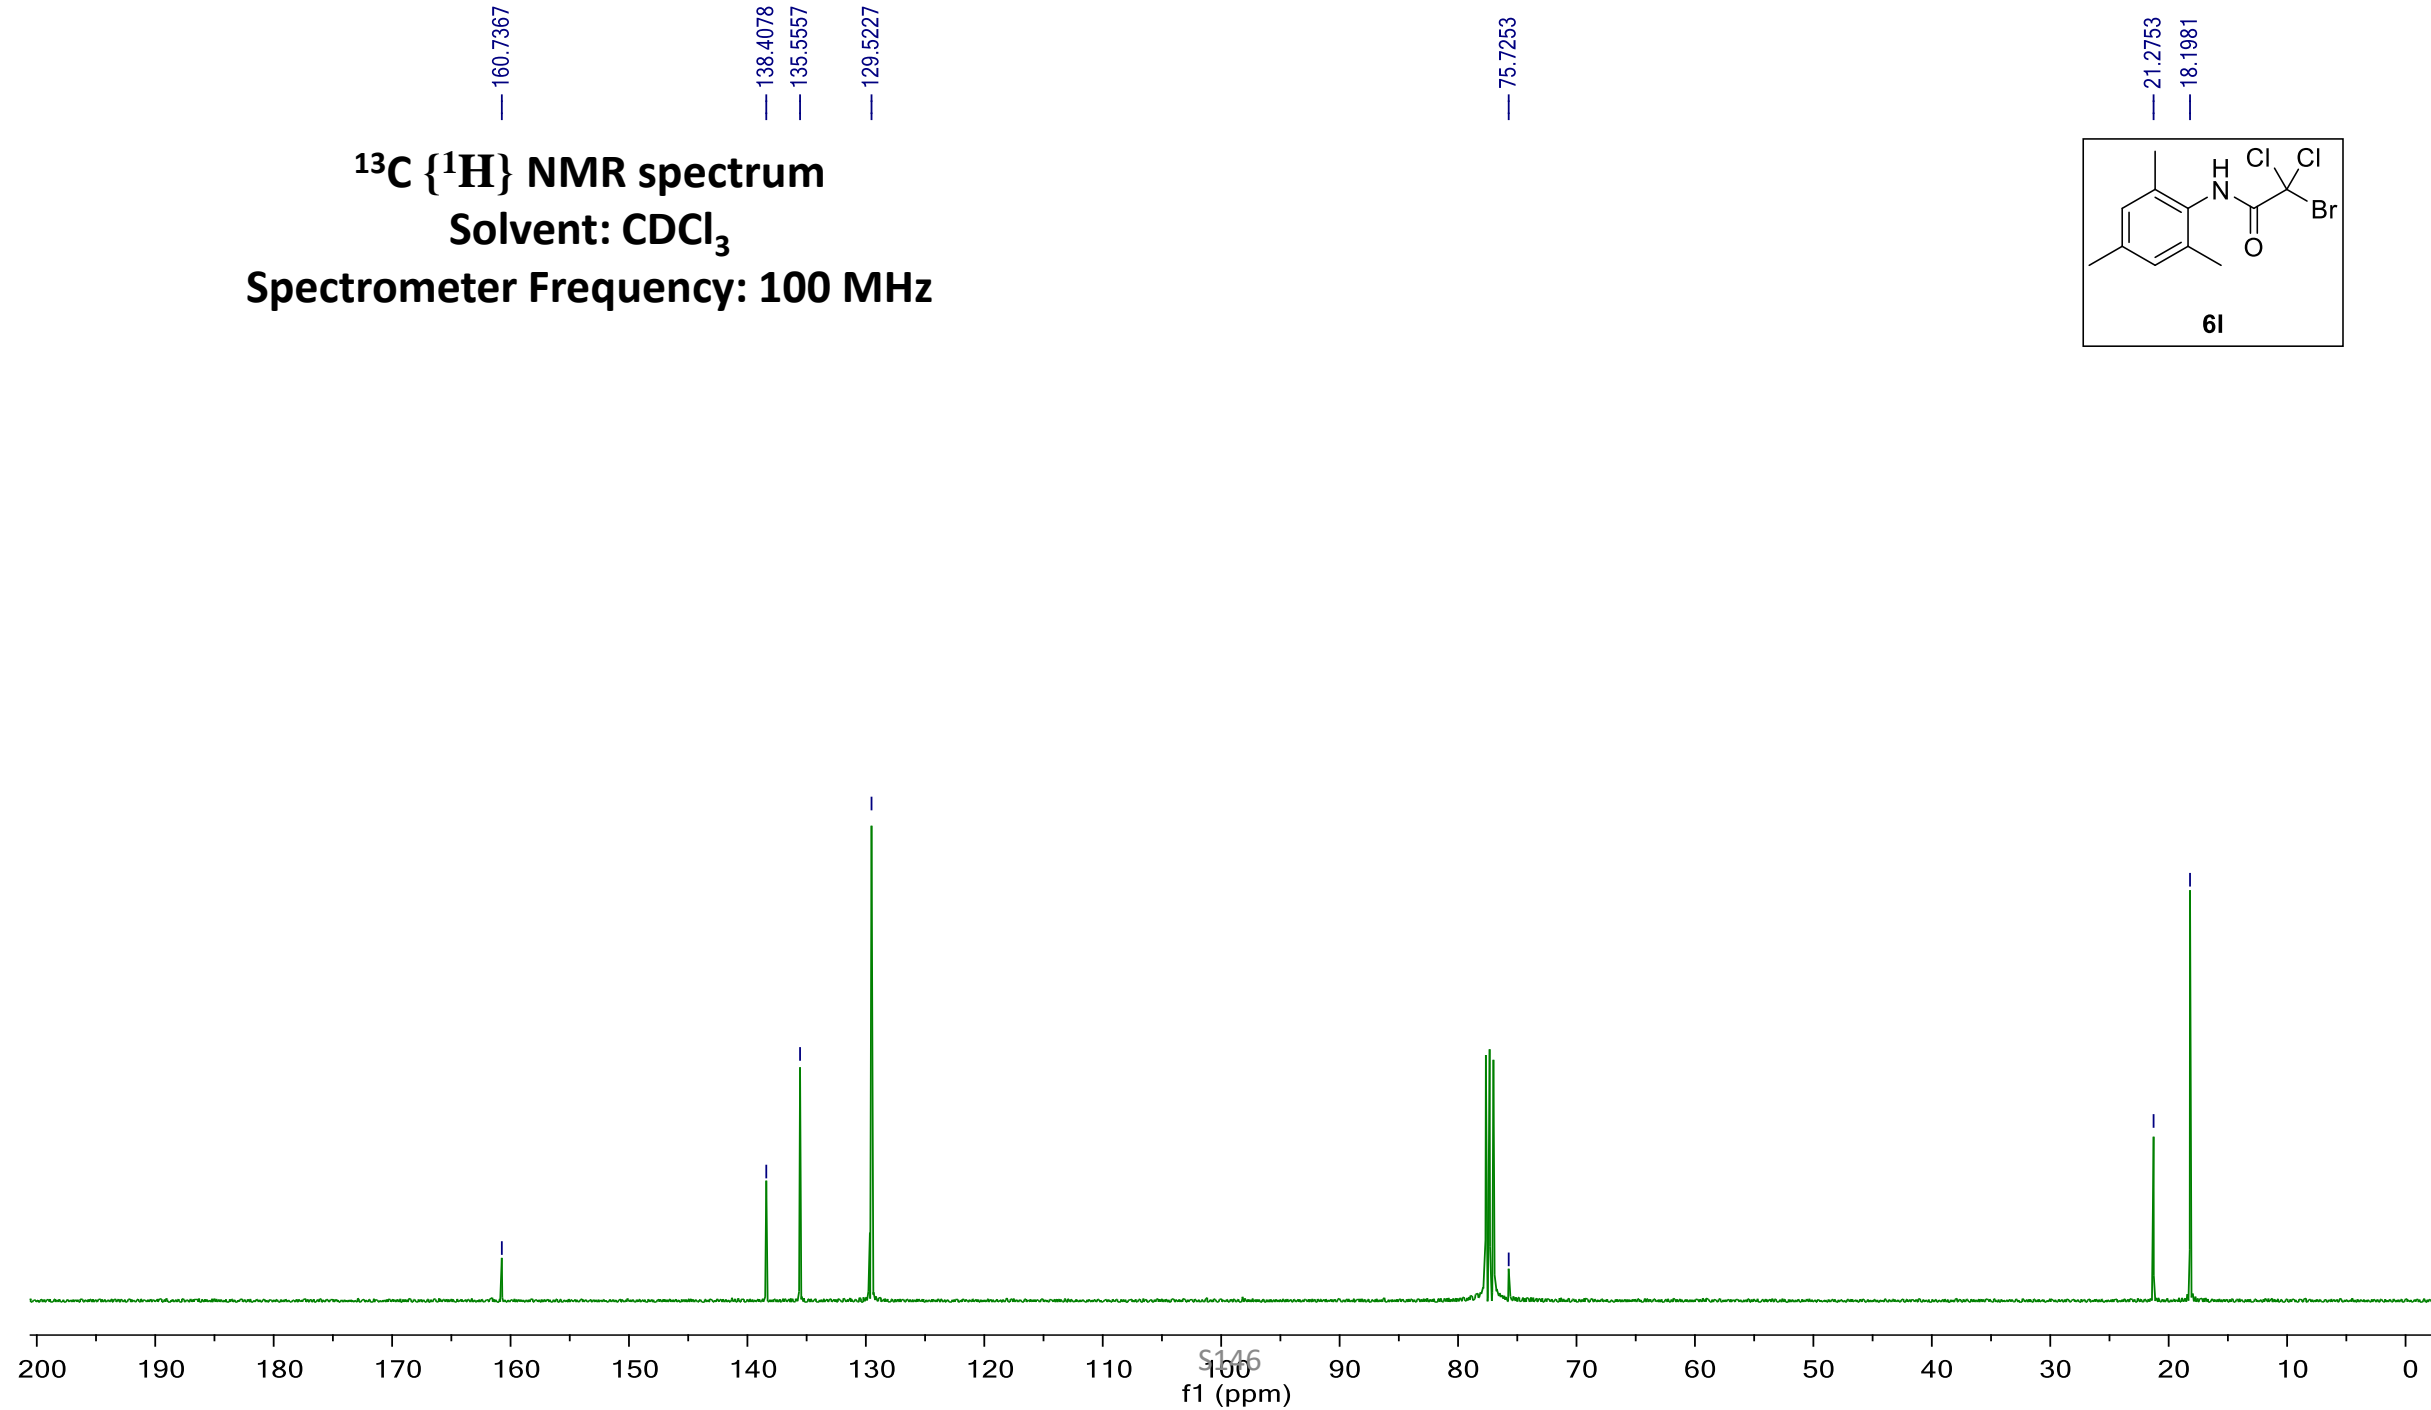

**$^1\text{H}$  NMR spectrum**  
**Solvent:  $\text{CDCl}_3$**   
**Spectrometer Frequency: 400 MHz**

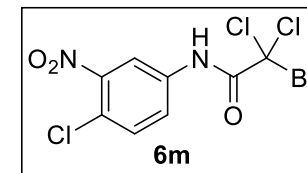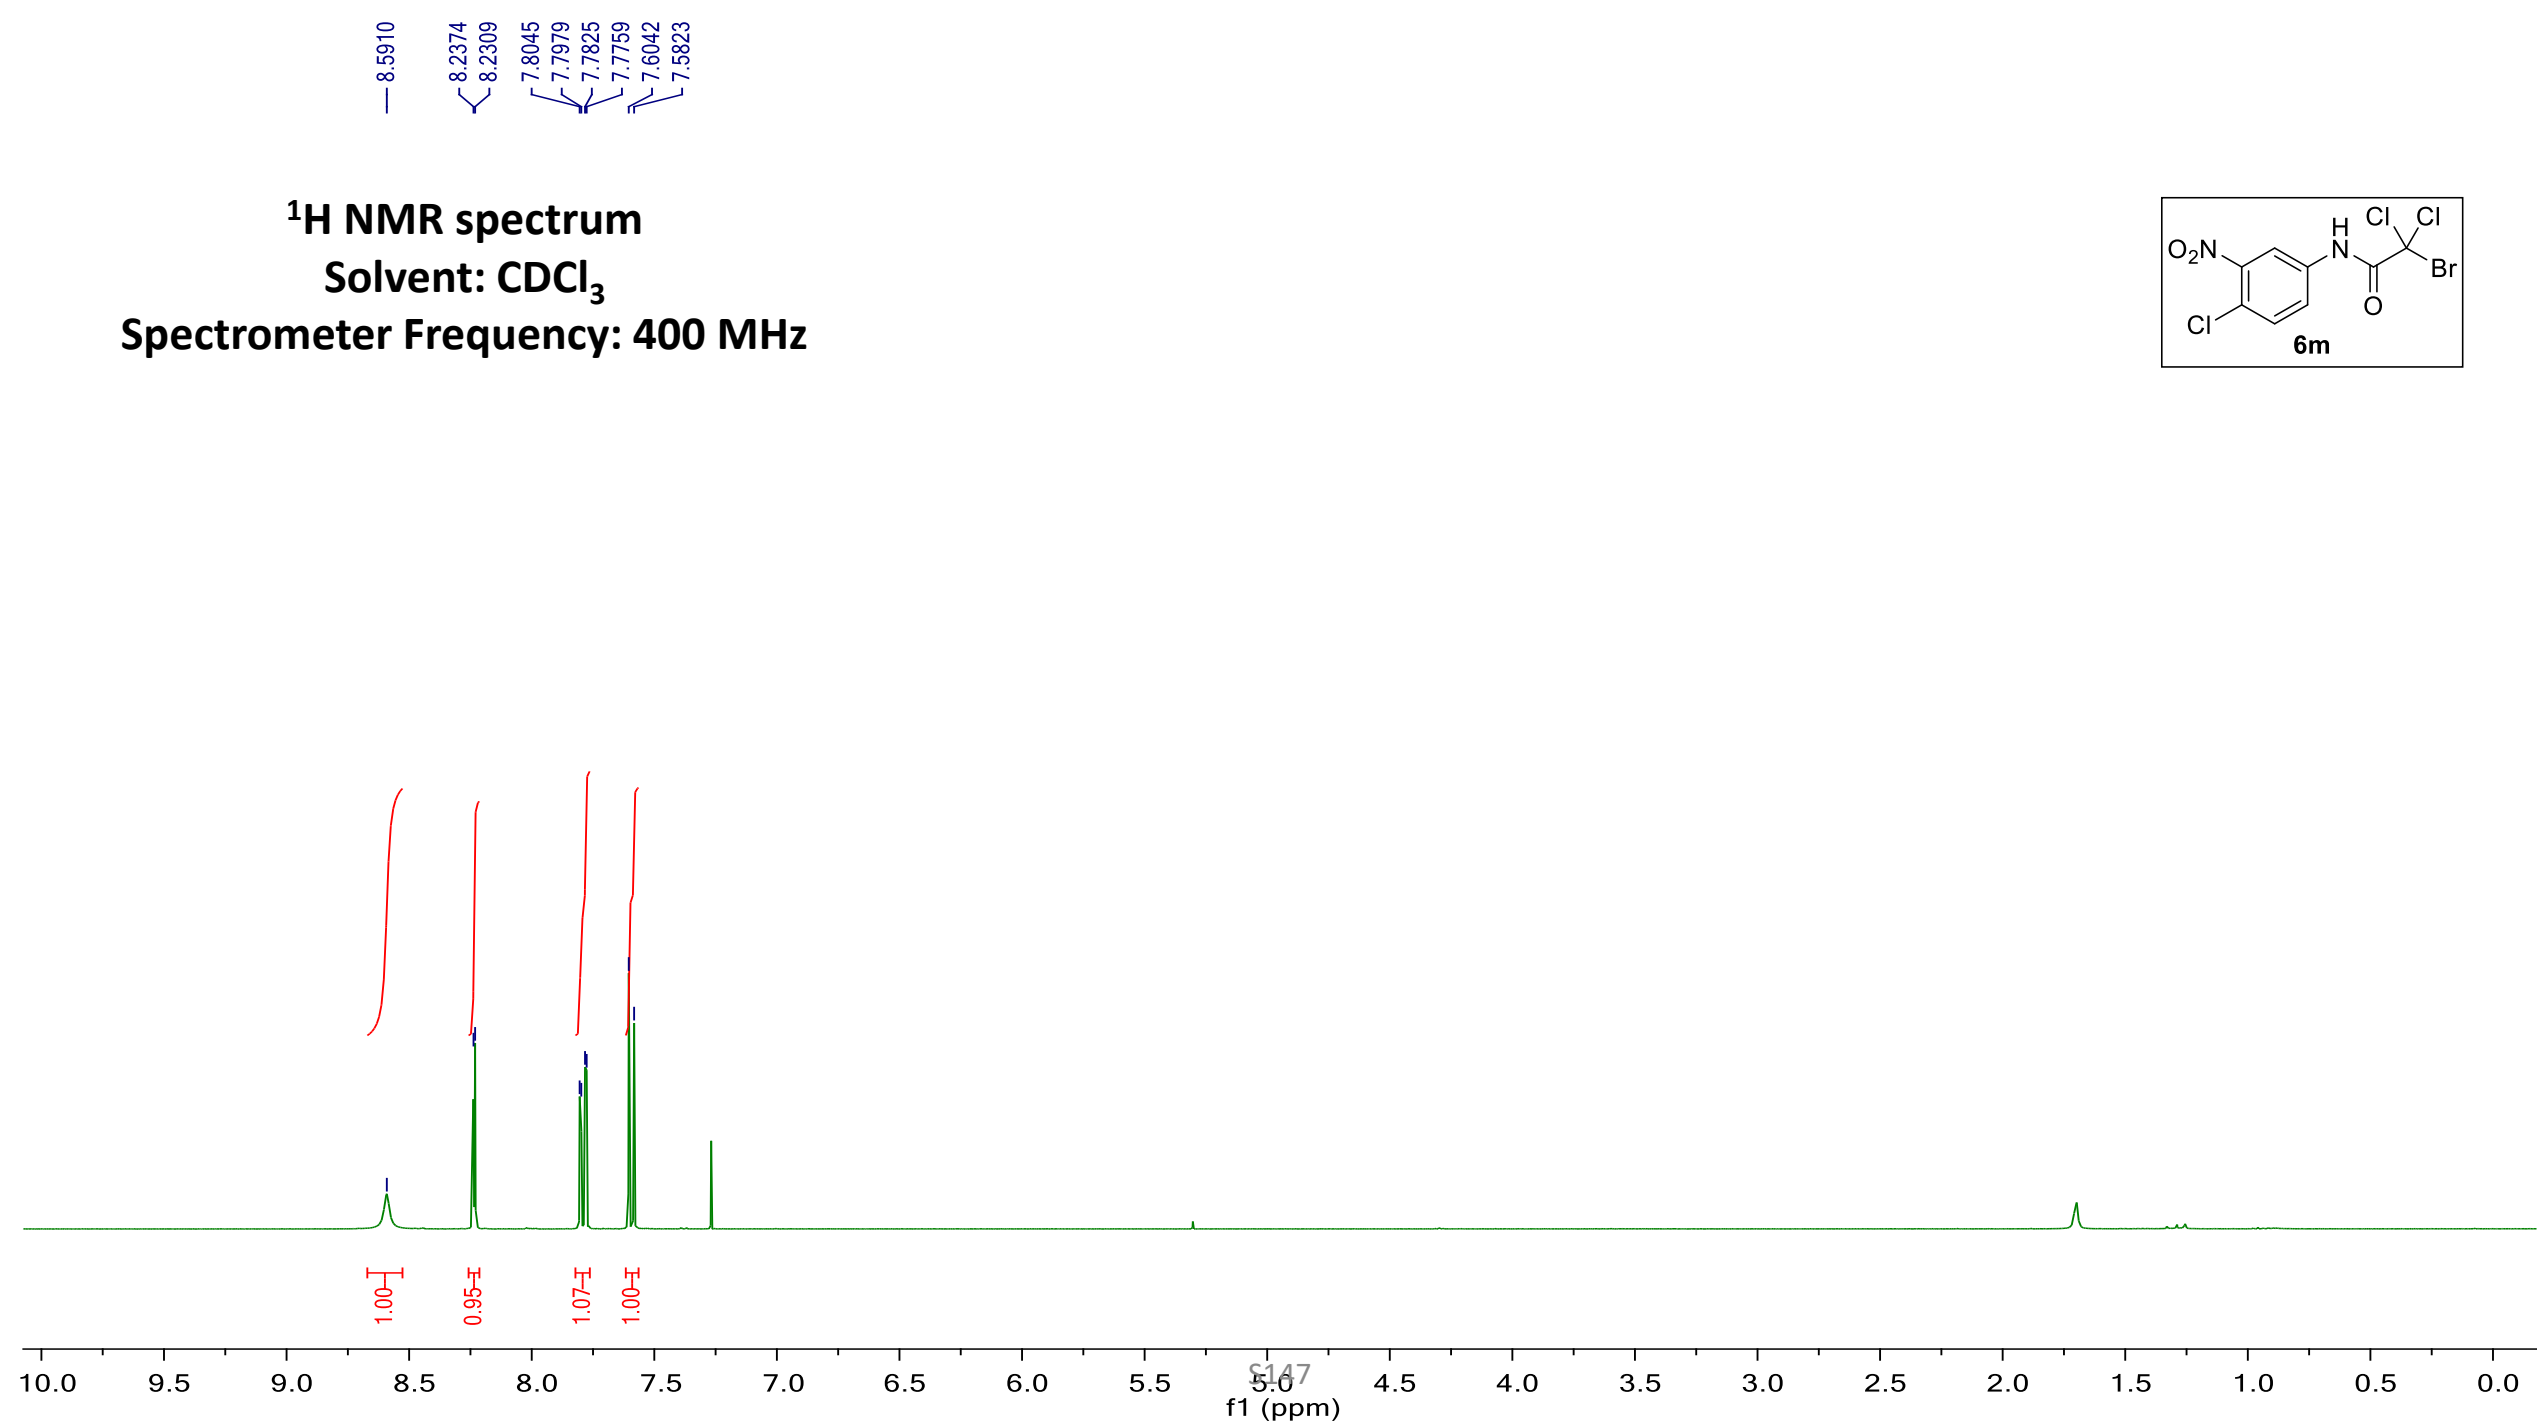

**$^{13}\text{C}$   $\{^1\text{H}\}$  NMR spectrum**

**Solvent:  $\text{CDCl}_3$**

**Spectrometer Frequency: 100 MHz**

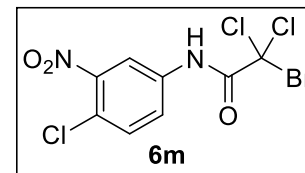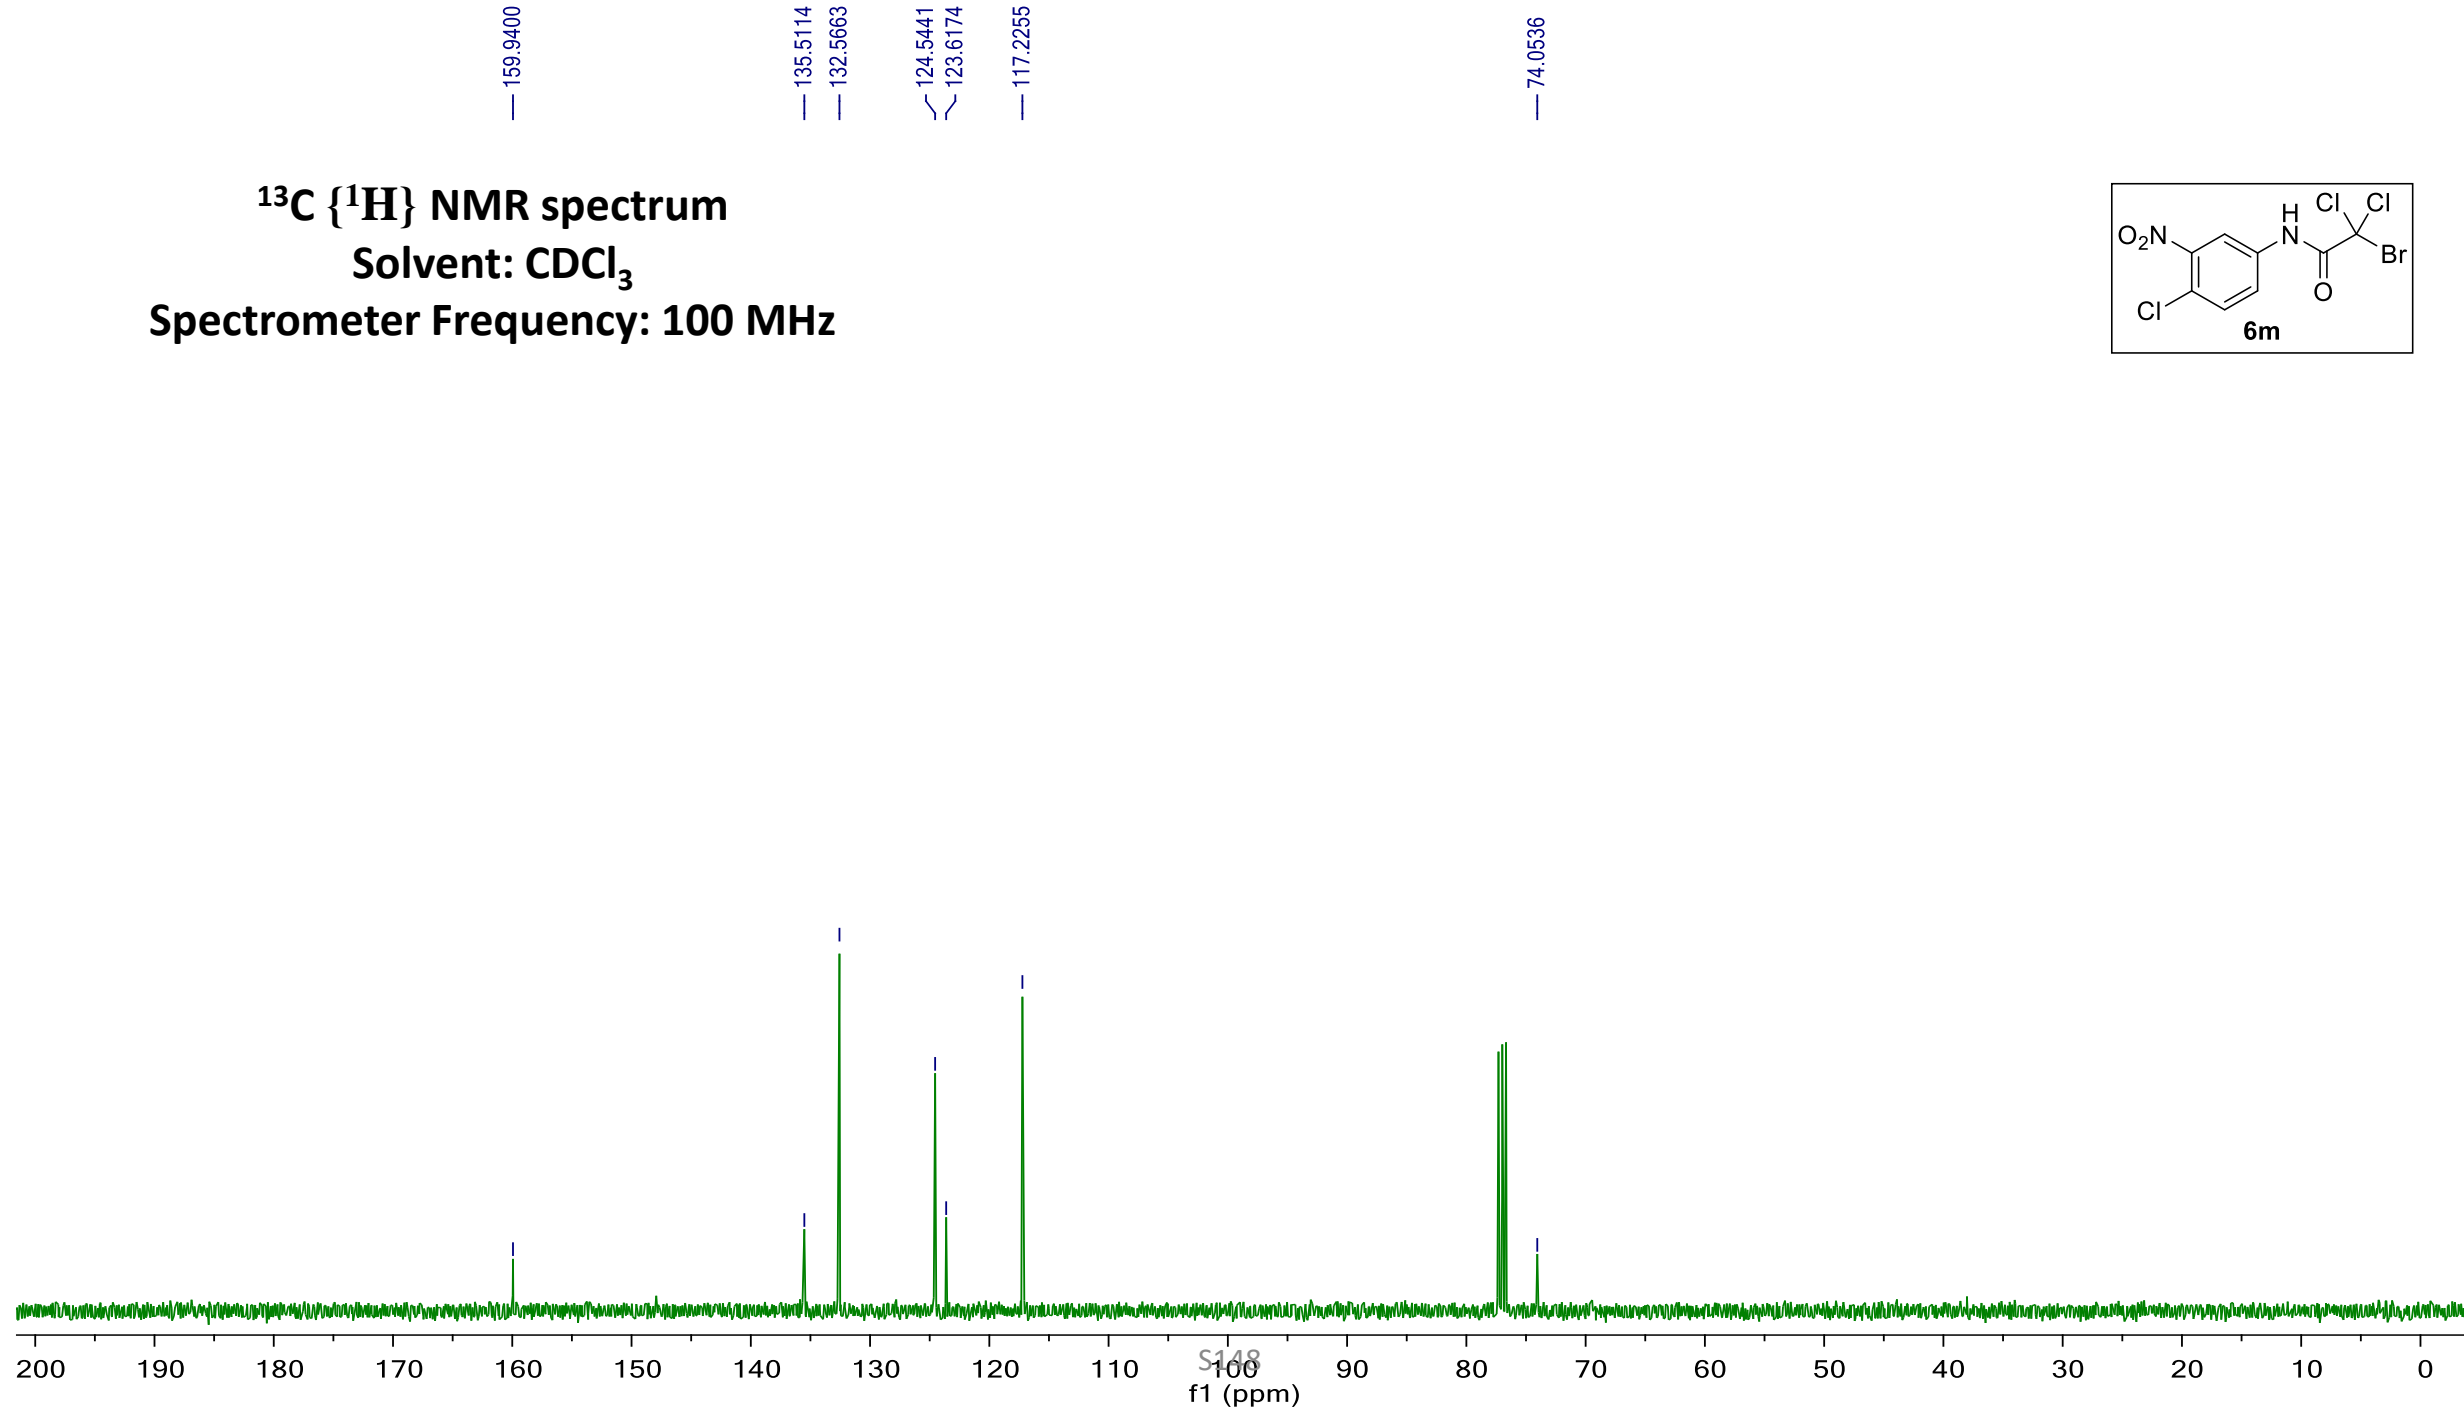

**$^1\text{H}$  NMR spectrum**  
**Solvent: DMSO- $d_6$**   
**Spectrometer Frequency: 400 MHz**

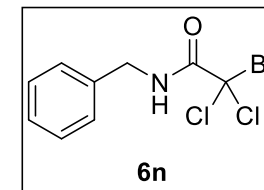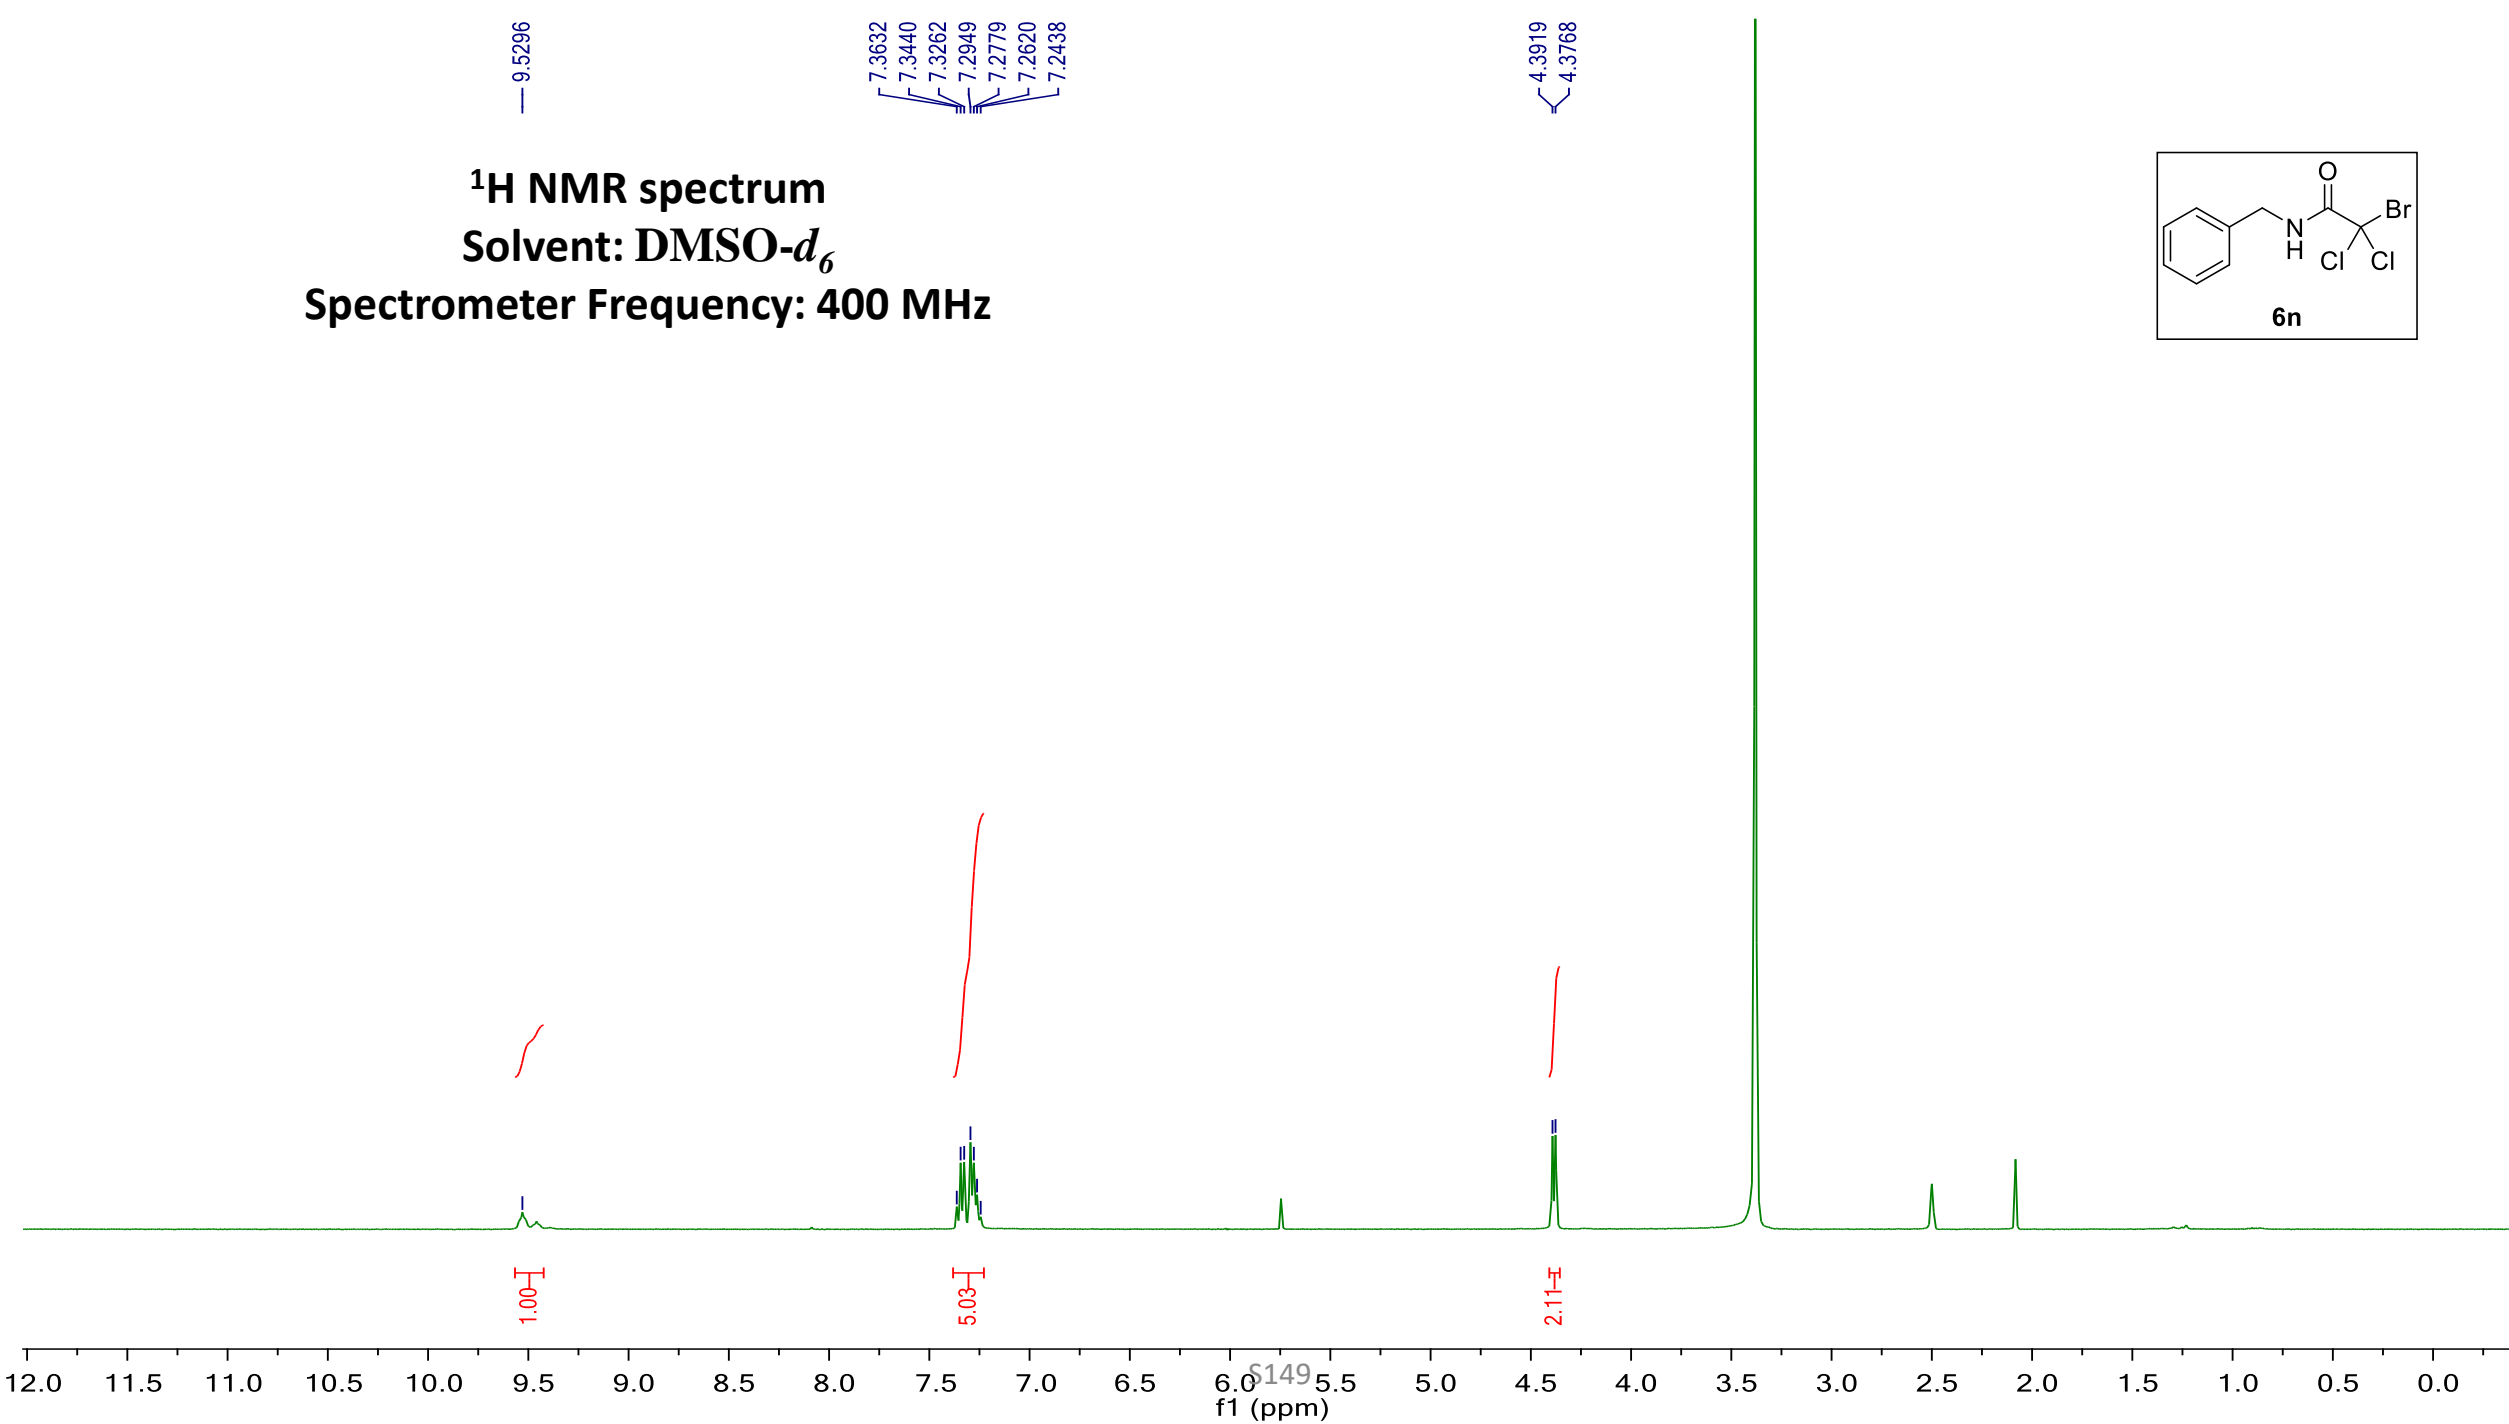

**$^{13}\text{C}$  { $^1\text{H}$ } NMR spectrum**  
**Solvent:  $\text{CDCl}_3$**   
**Spectrometer Frequency: 100 MHz**



— 162.4109 — 136.4800 — 129.1436 — 128.3111 — 127.9125 — 75.1553 — 45.6047

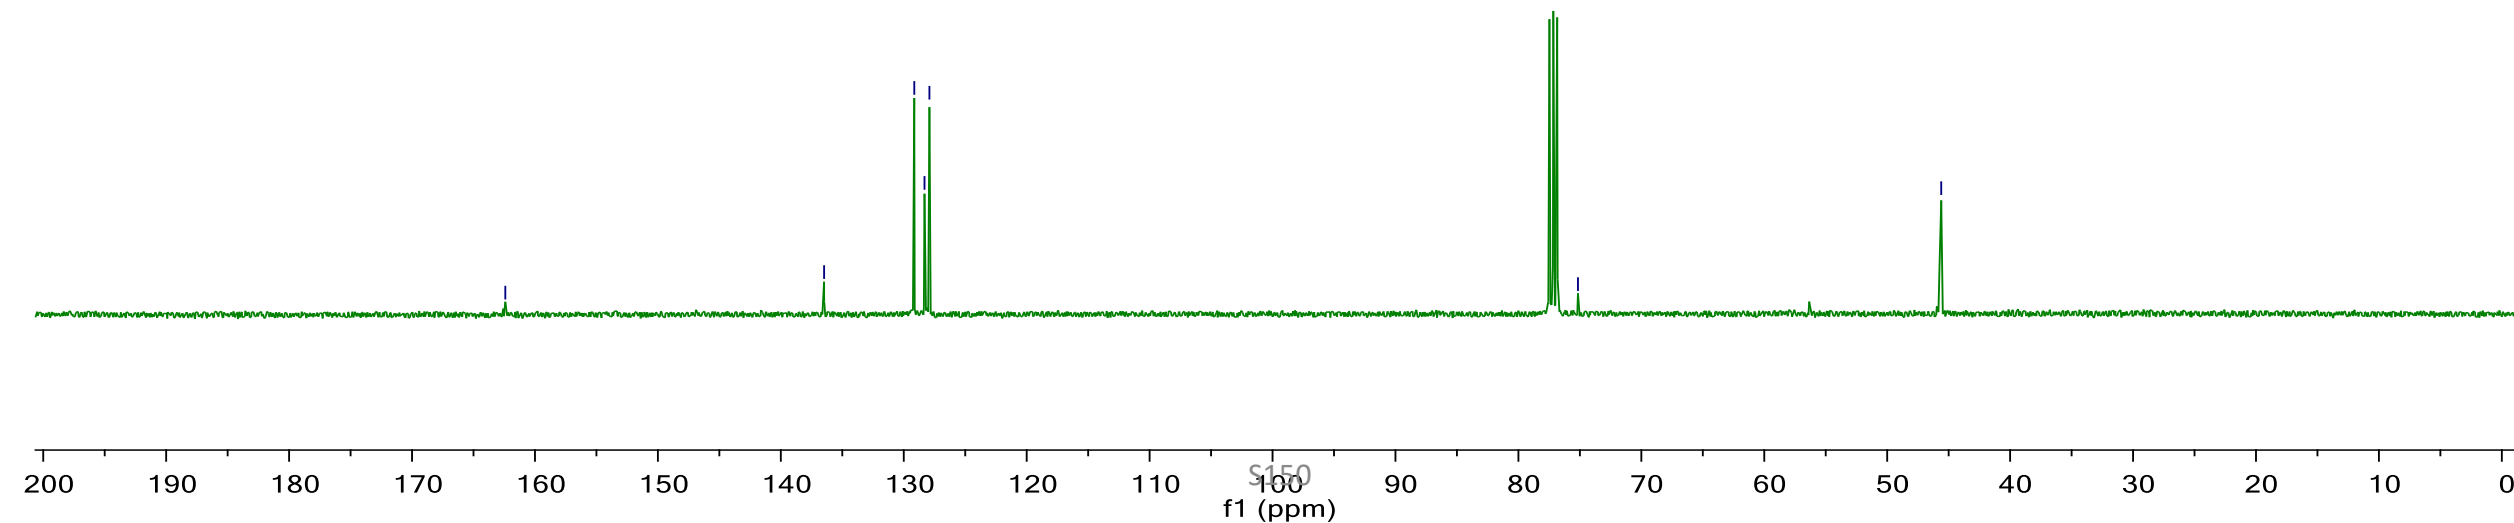

**$^1\text{H}$  NMR spectrum**  
**Solvent: DMSO- $d_6$**   
**Spectrometer Frequency: 400 MHz**

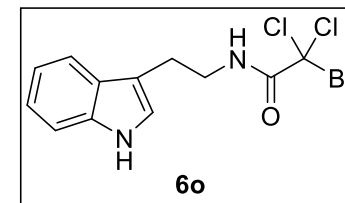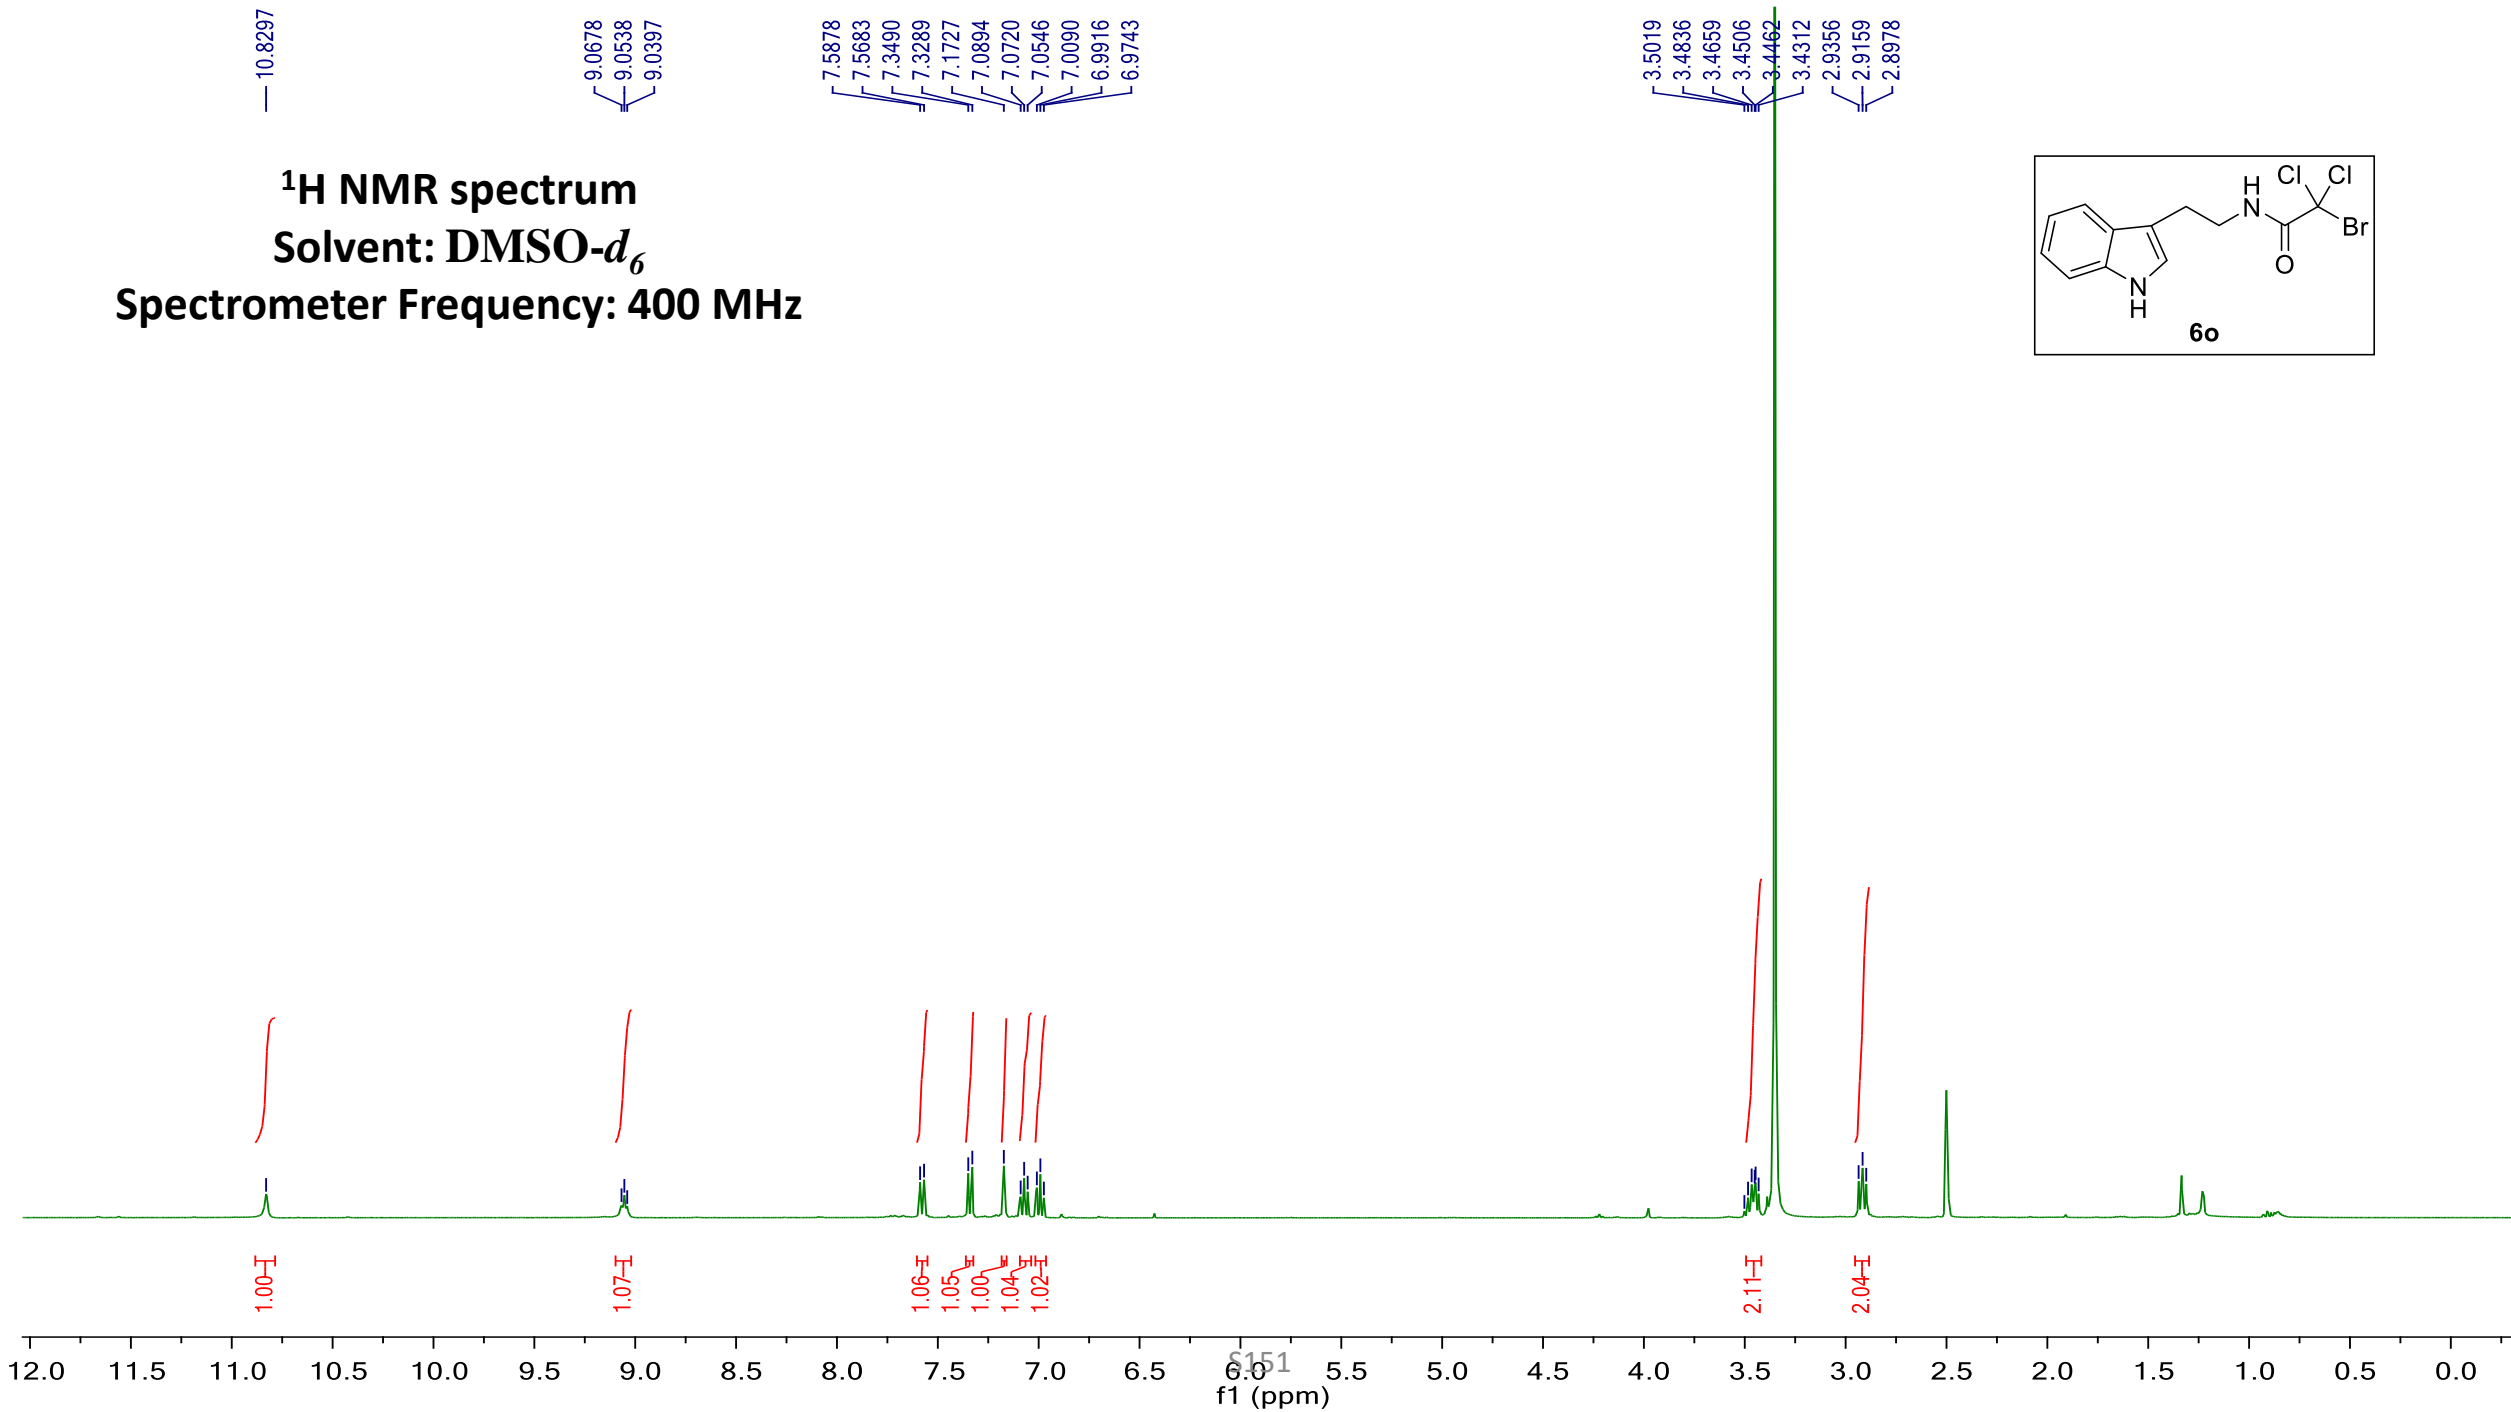

**$^{13}\text{C}$   $\{^1\text{H}\}$  NMR spectrum**  
**Solvent:  $\text{CDCl}_3$**   
**Spectrometer Frequency: 100 MHz**

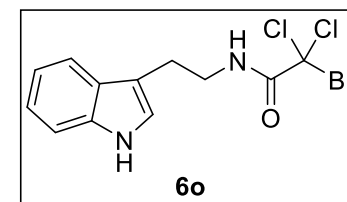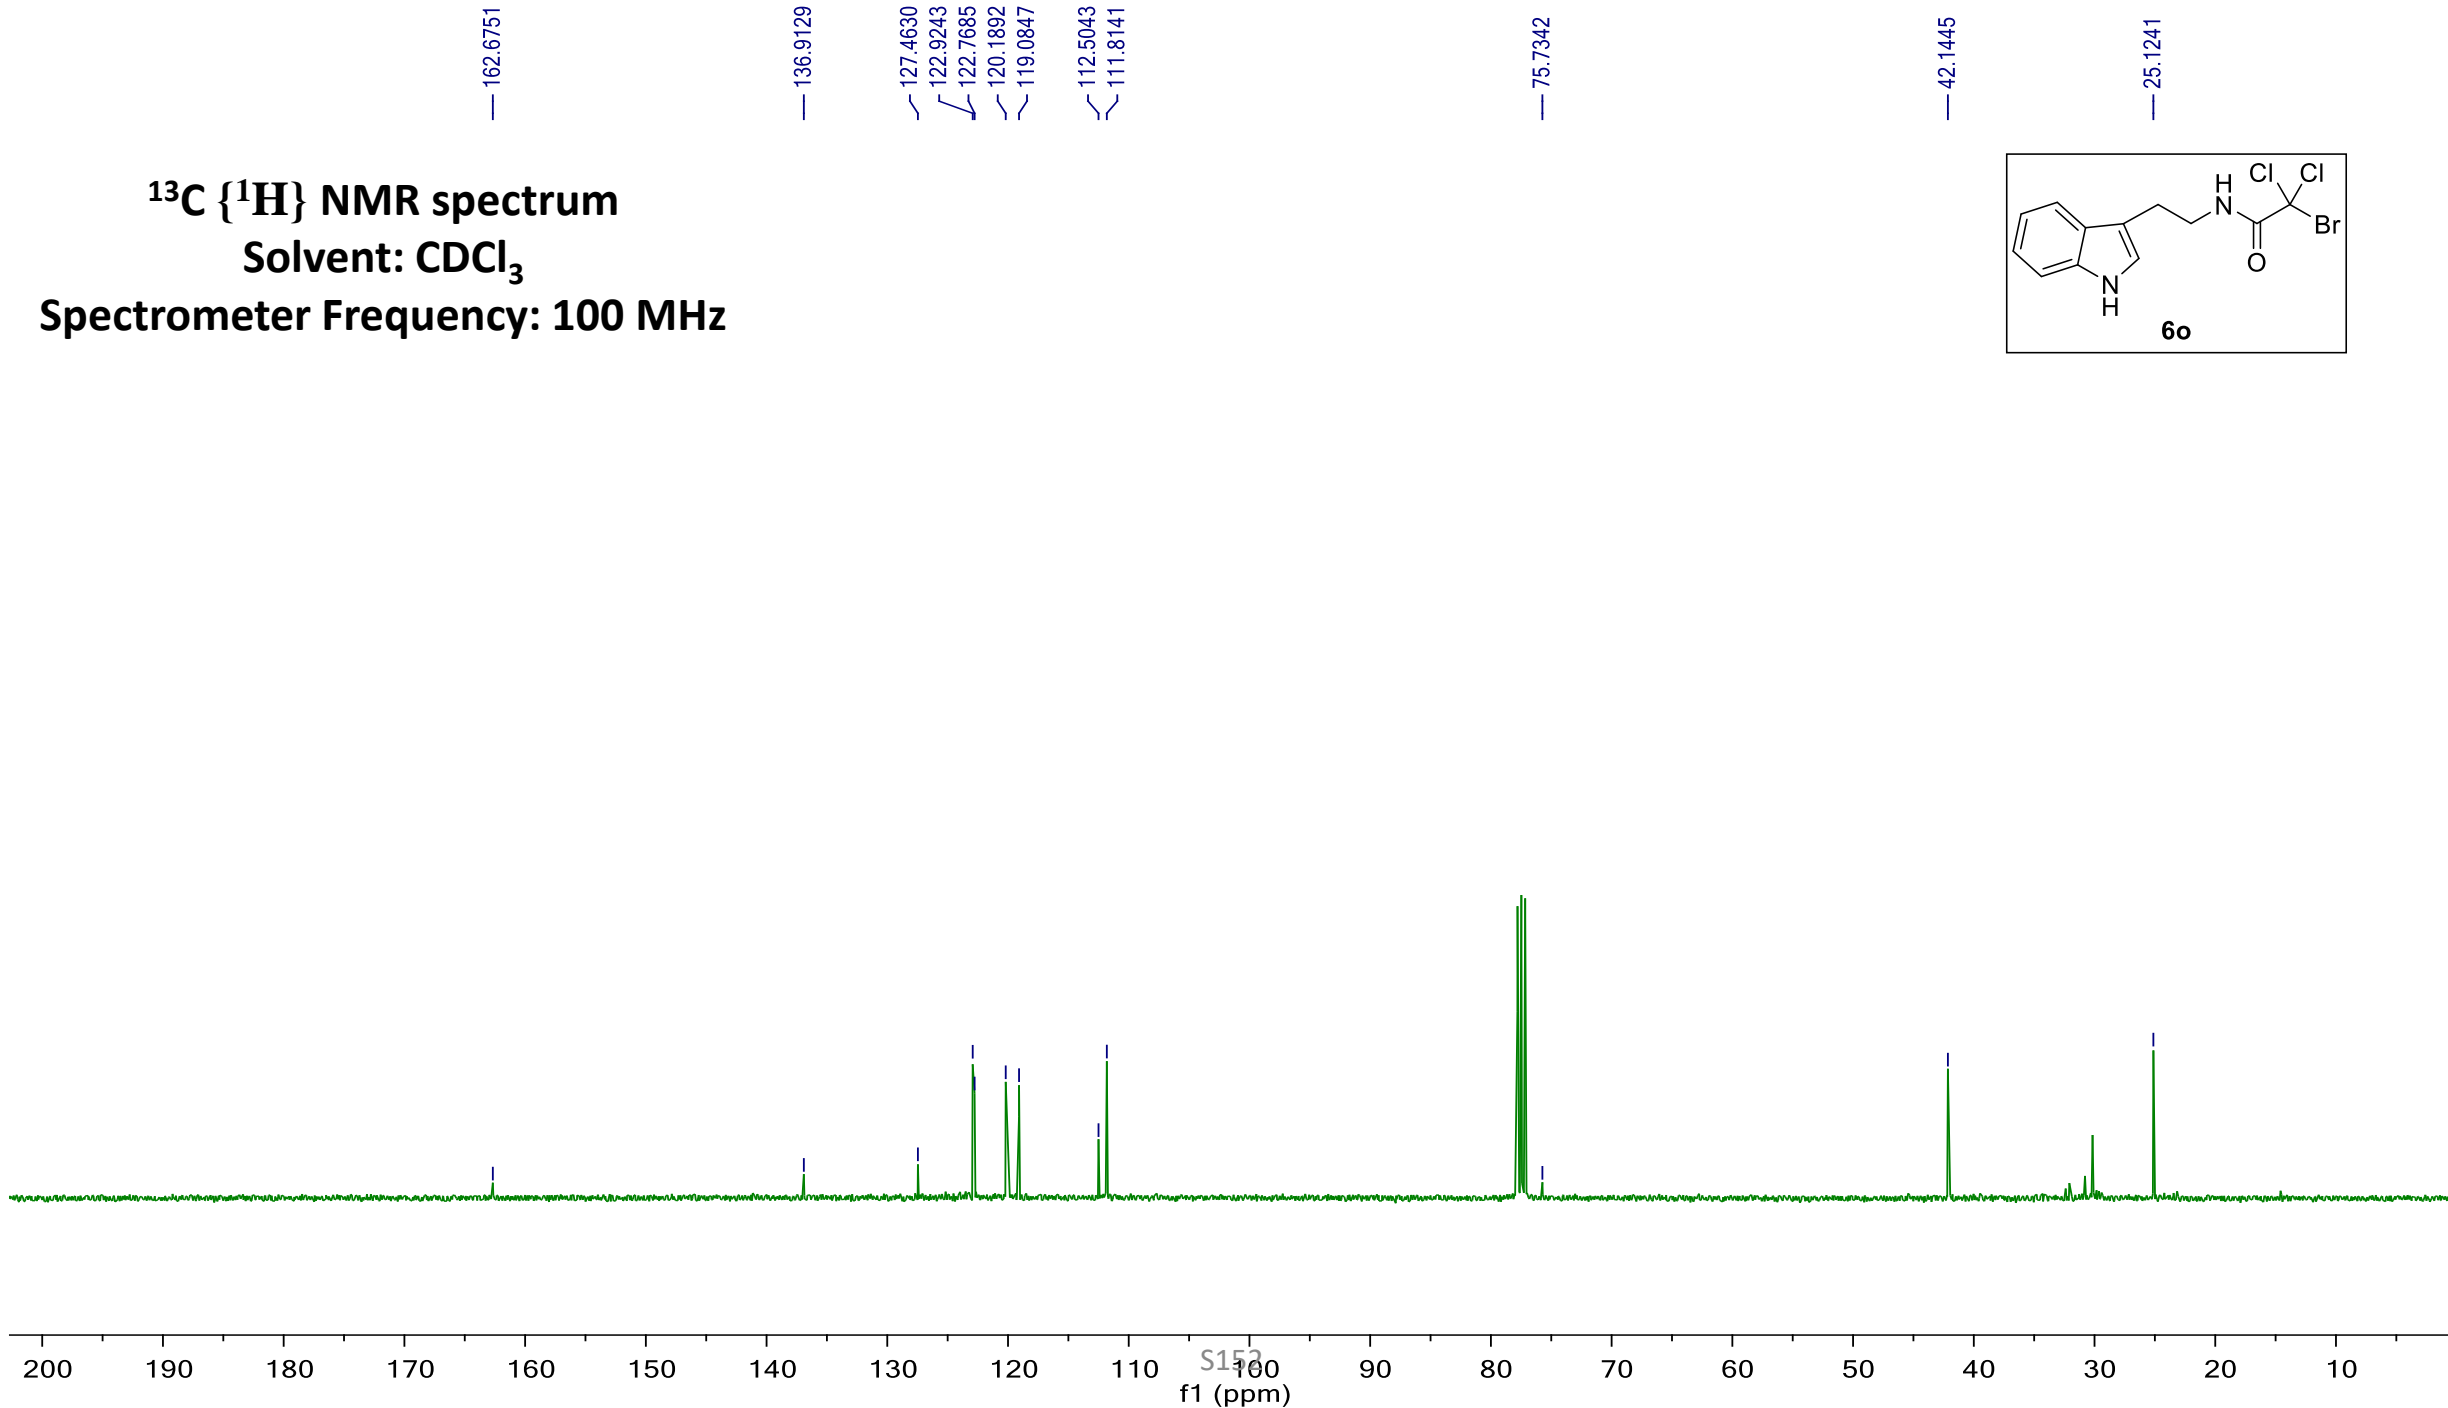

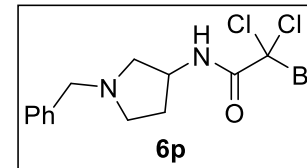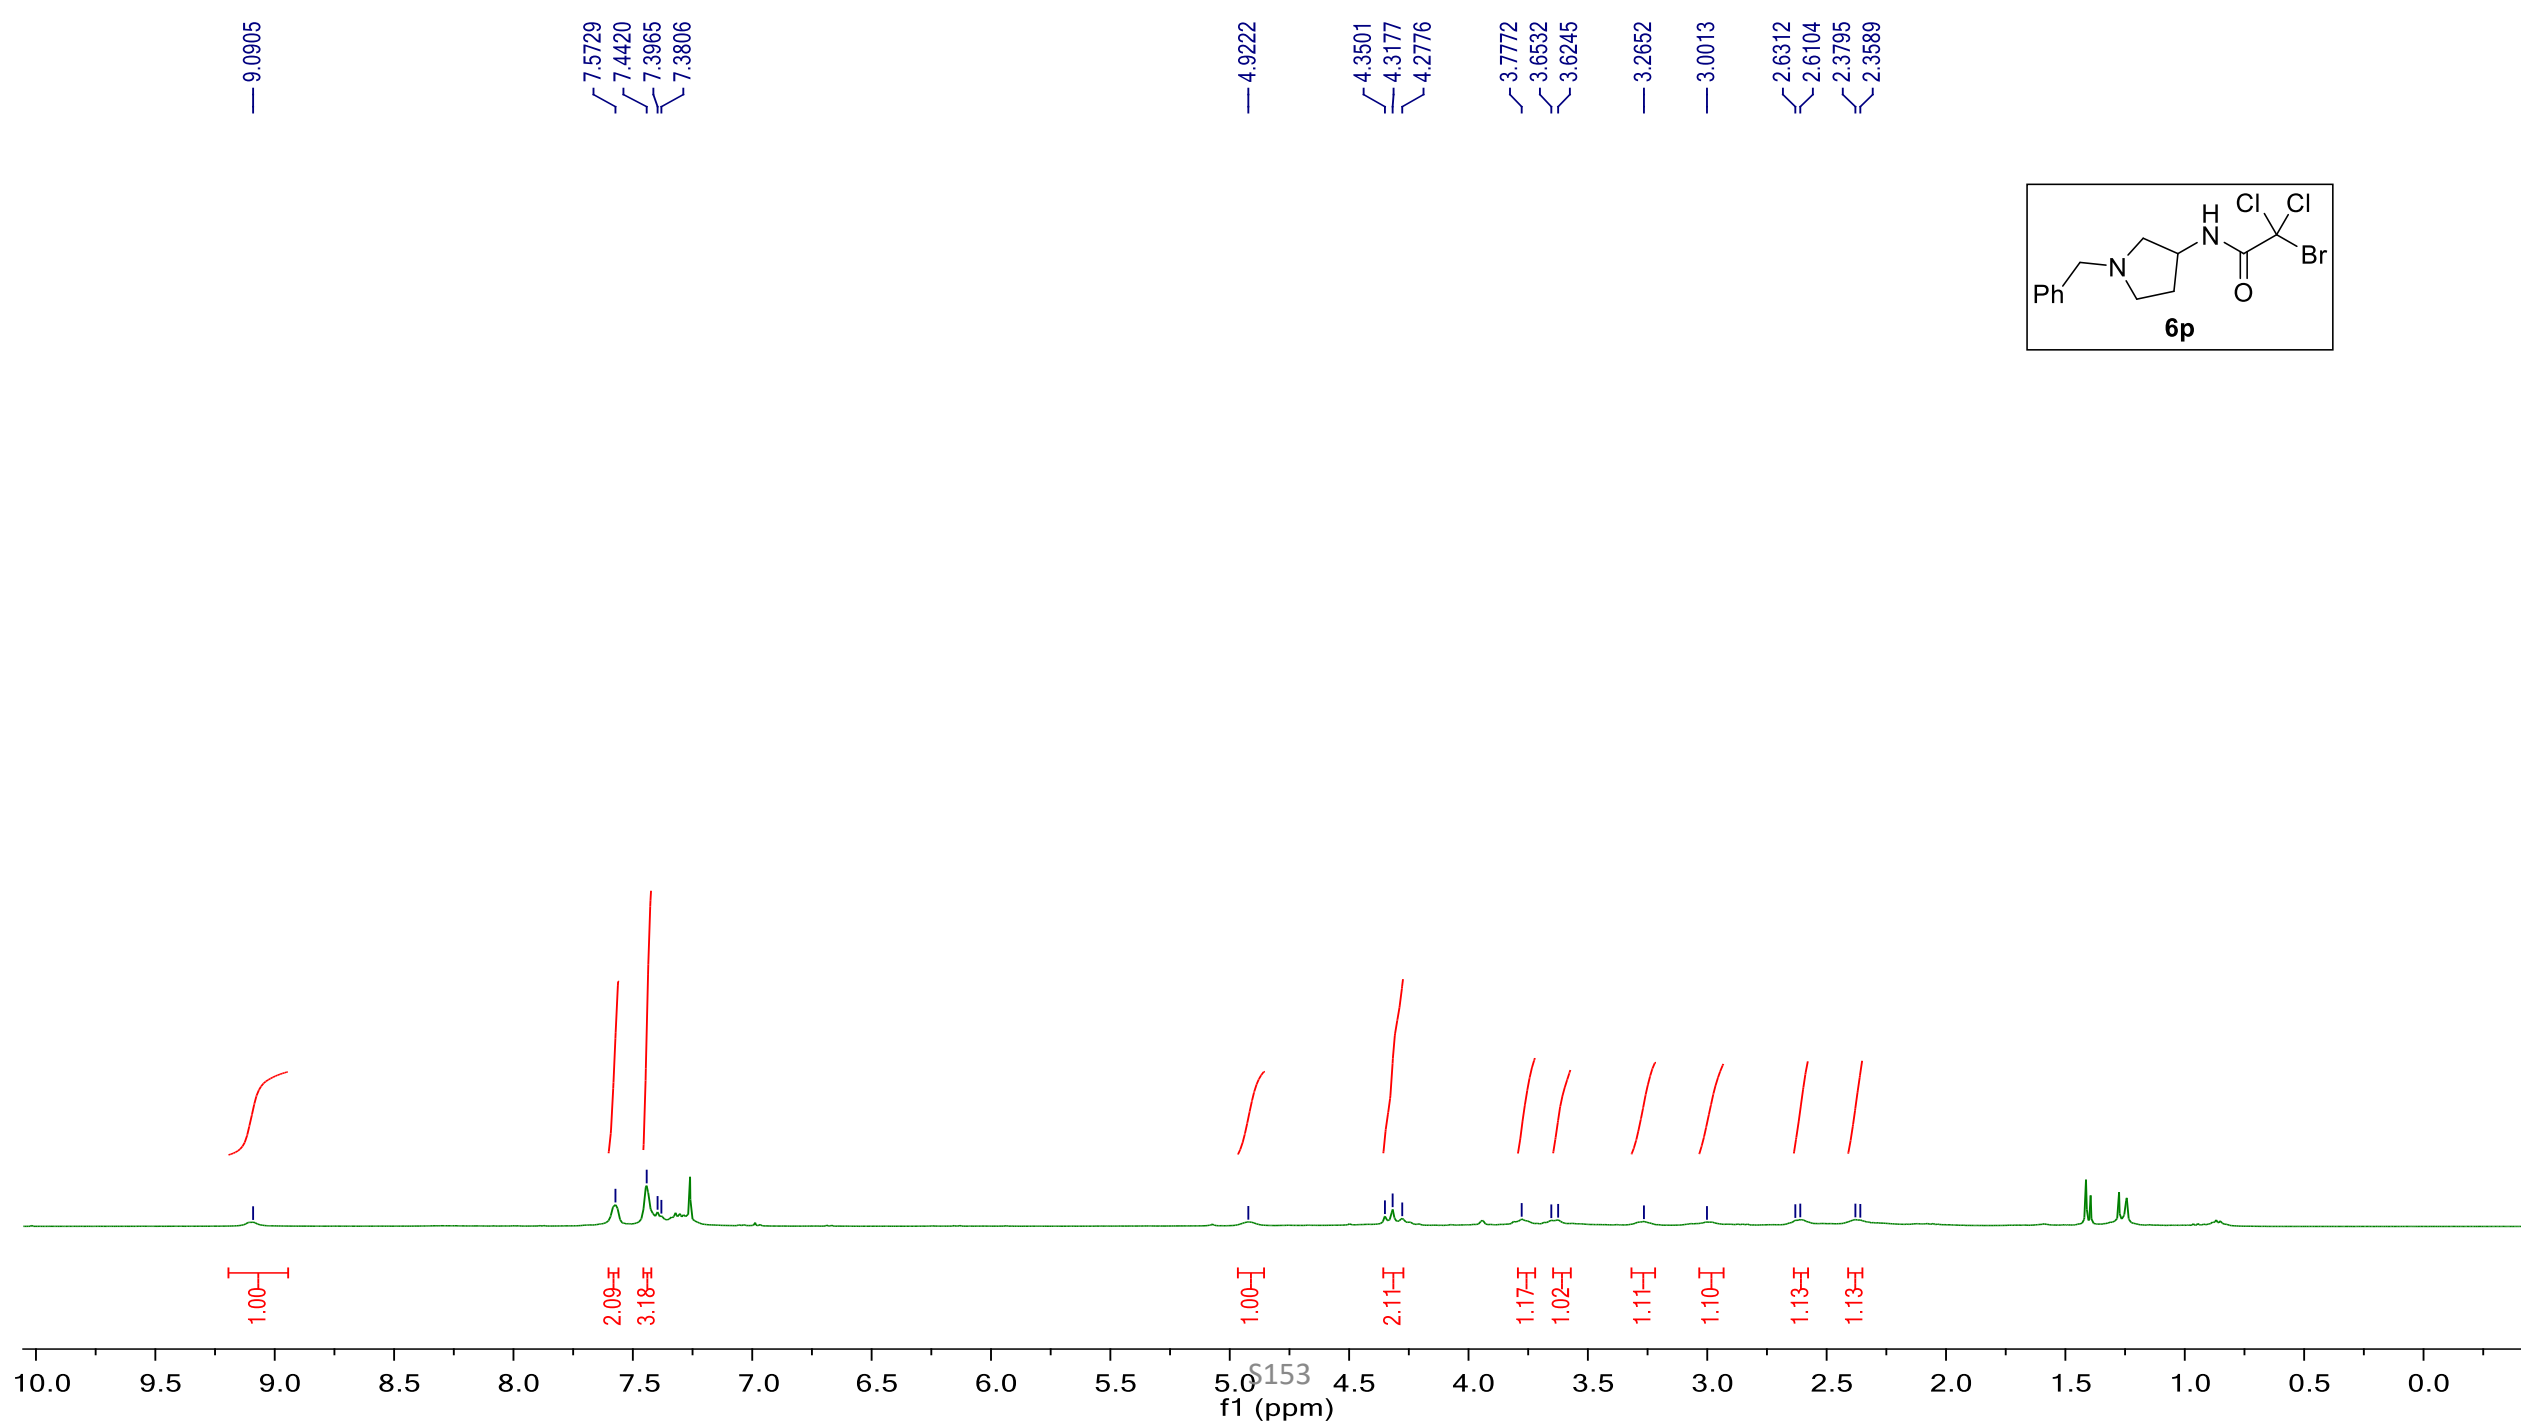

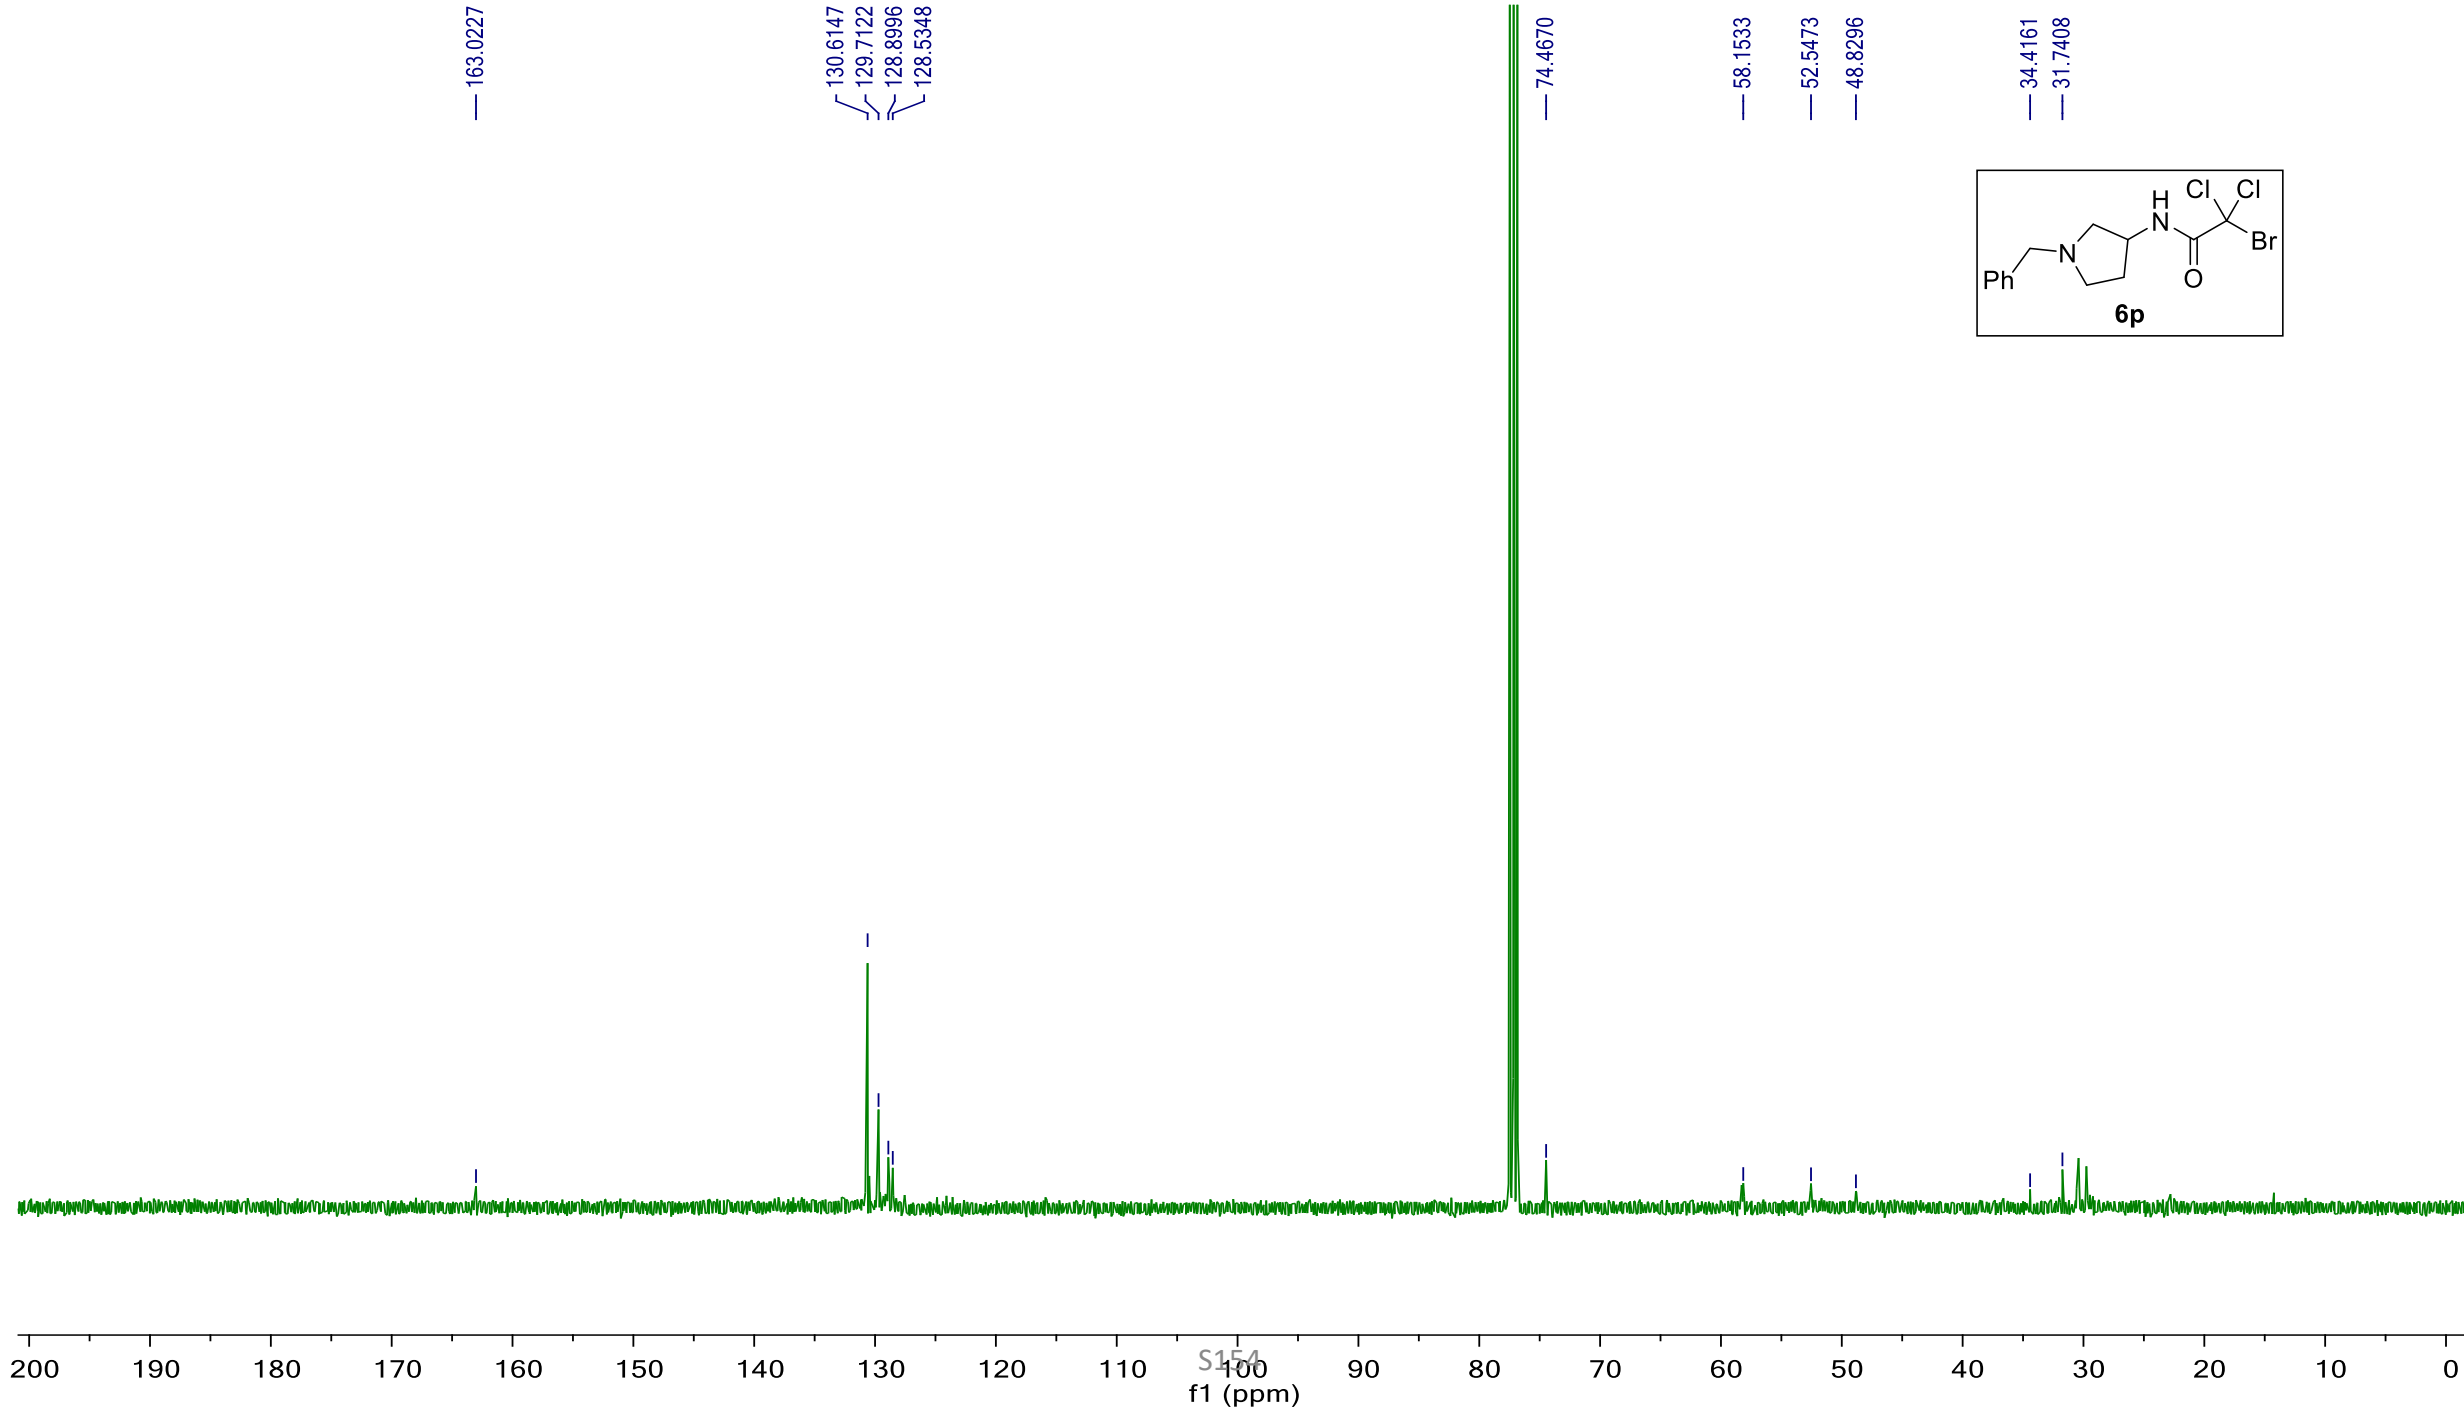

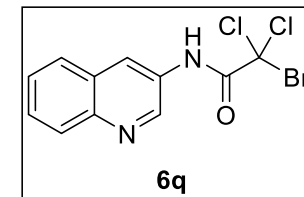

**$^1\text{H}$  NMR spectrum**

**Solvent: DMSO- $d_6$**

**Spectrometer Frequency: 400 MHz**

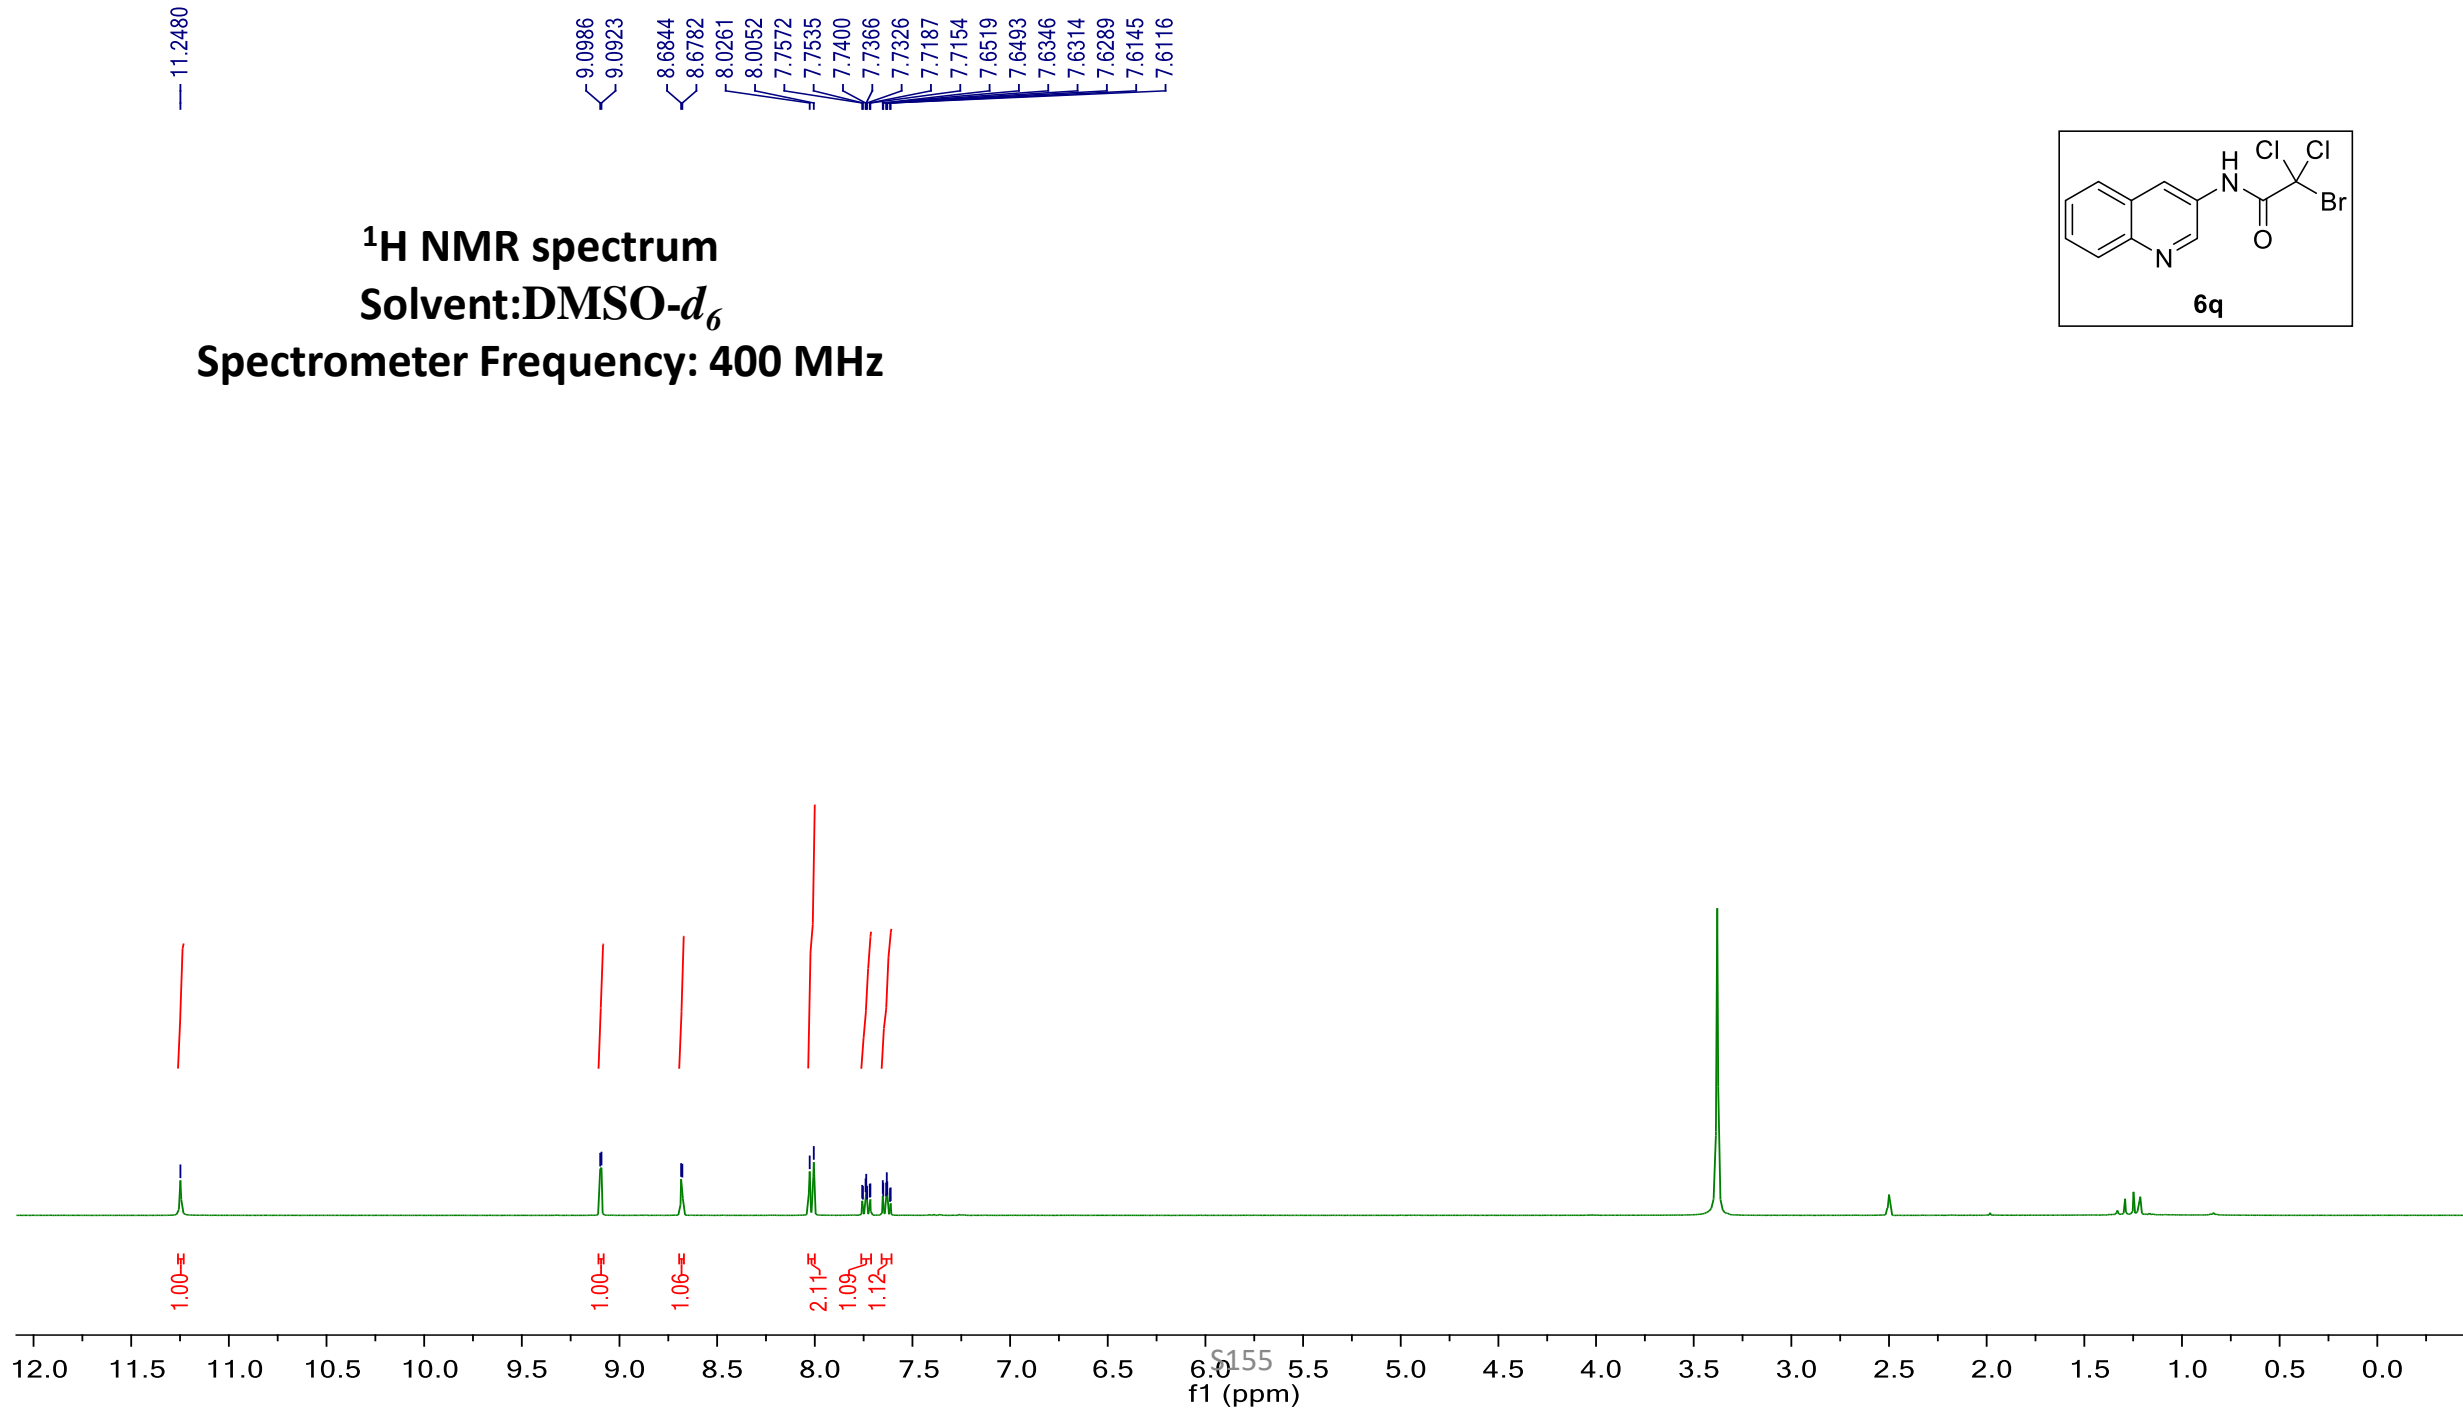

**$^{13}\text{C}$  { $^1\text{H}$ } NMR spectrum**  
**Solvent: DMSO- $d_6$**   
**Spectrometer Frequency: 100 MHz**

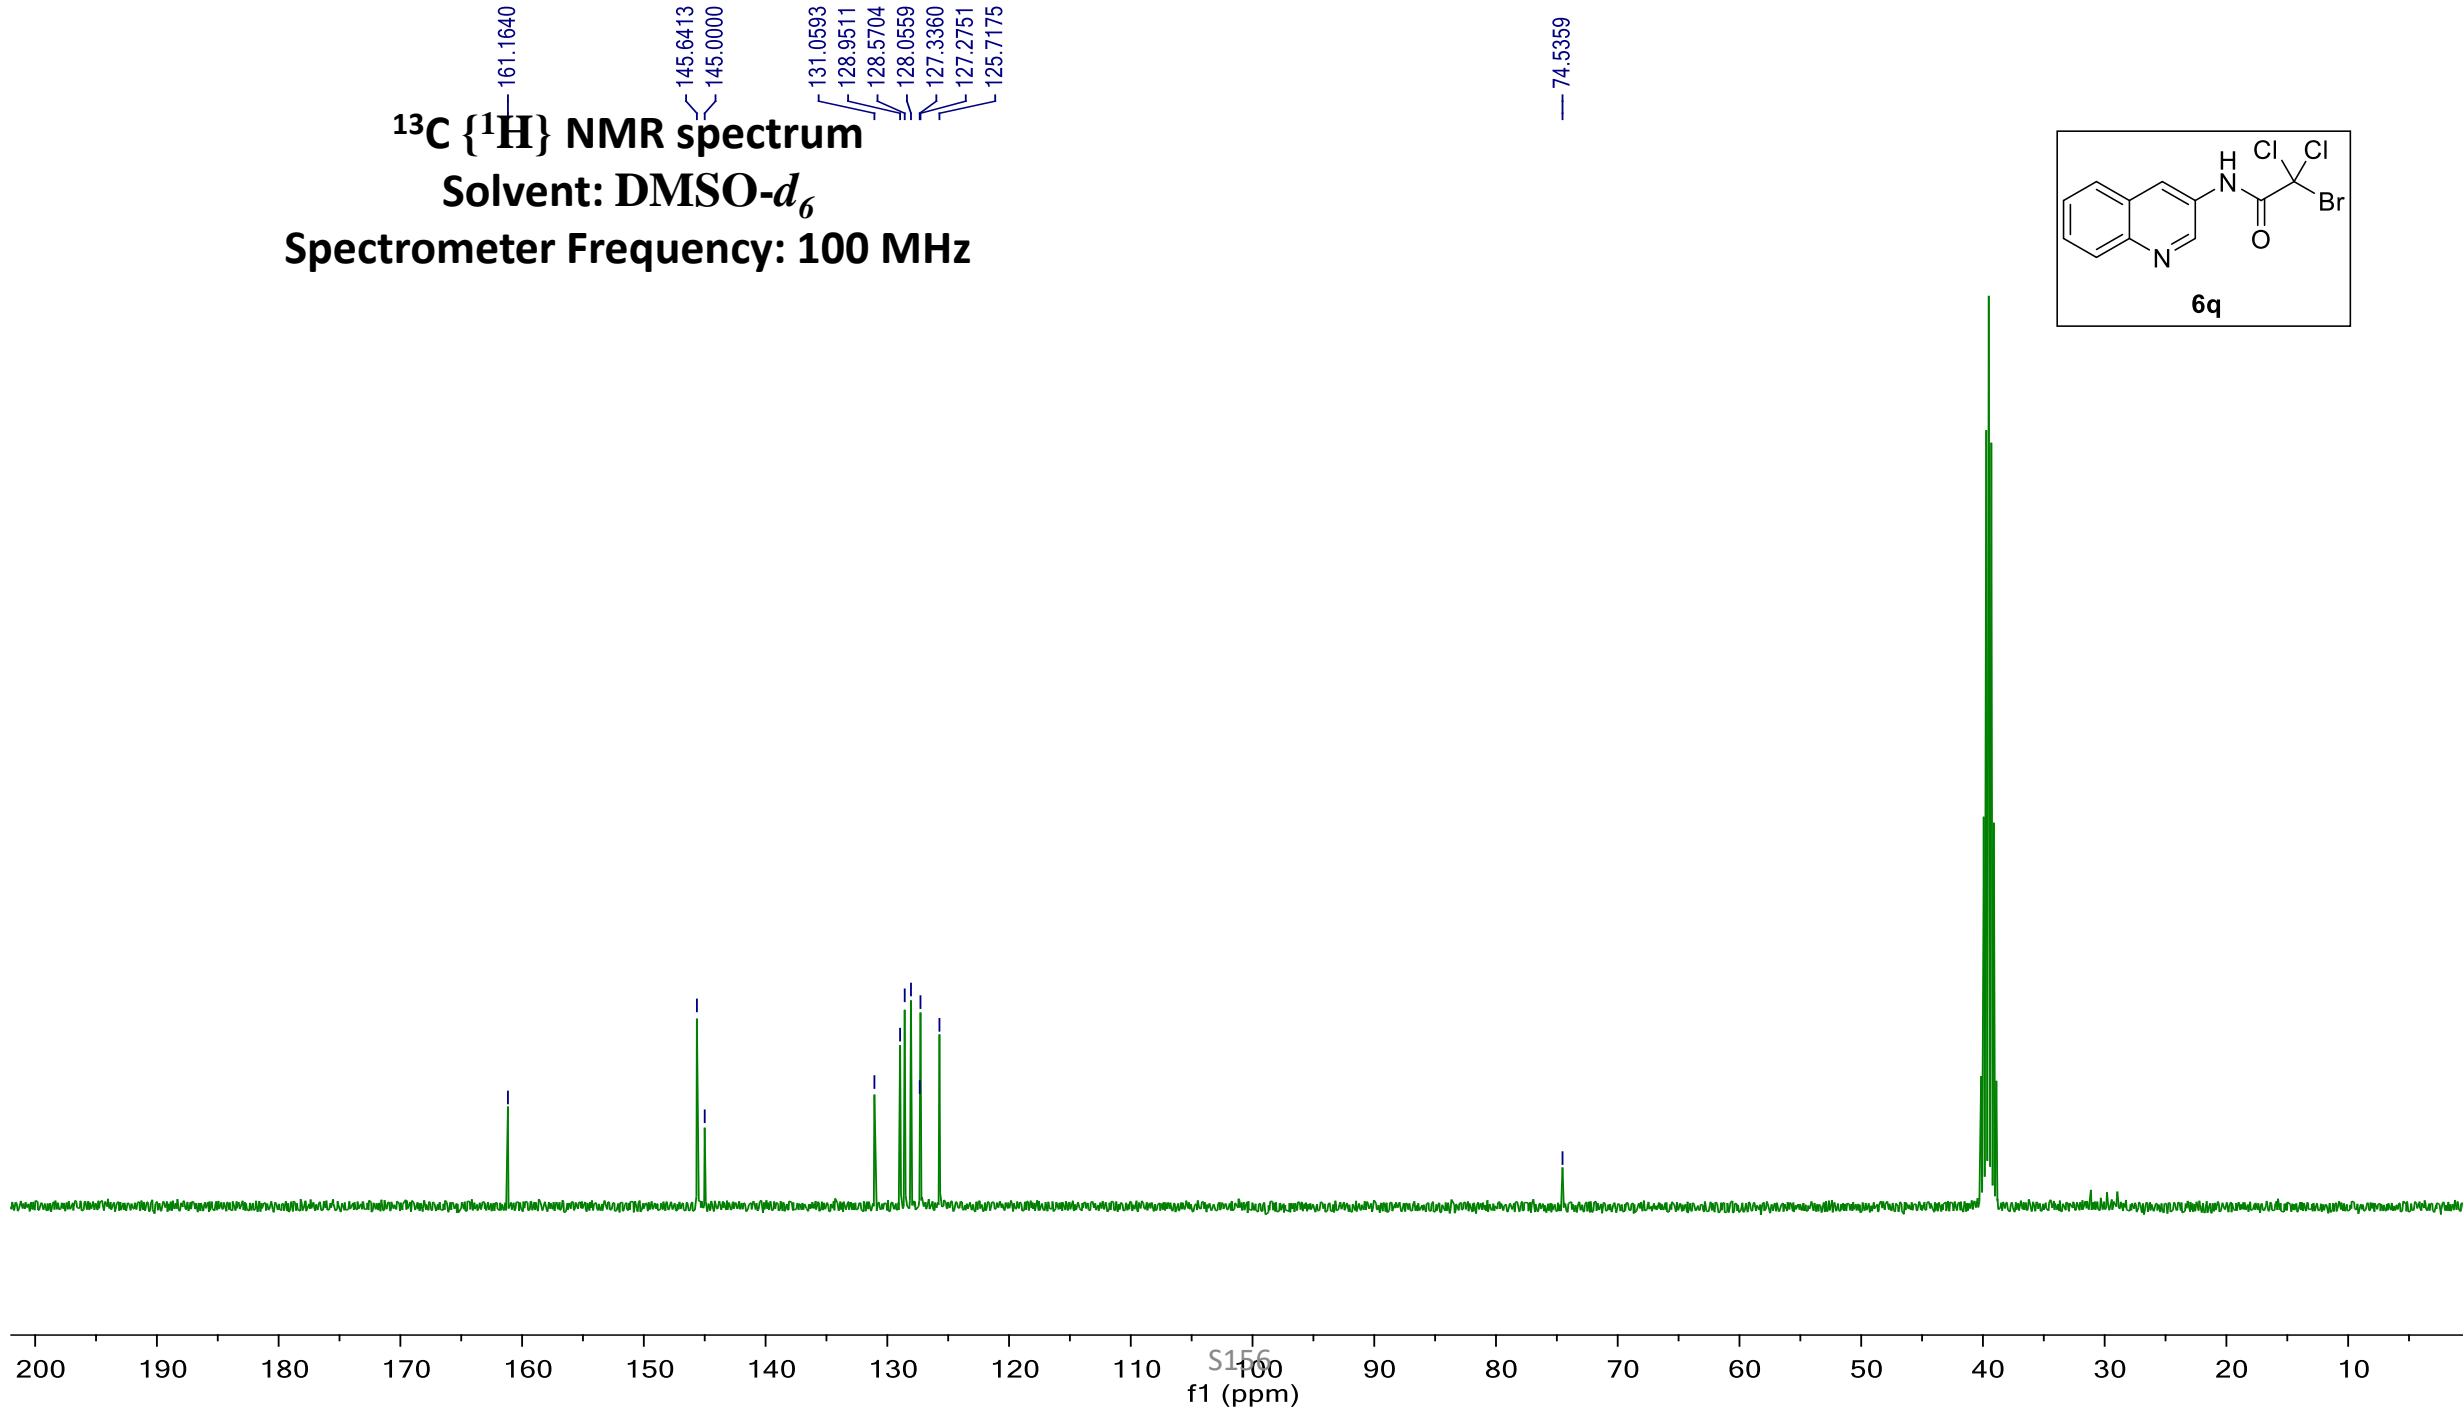

**$^1\text{H}$  NMR spectrum**  
**Solvent:  $\text{CDCl}_3$**   
**Spectrometer Frequency: 400 MHz**

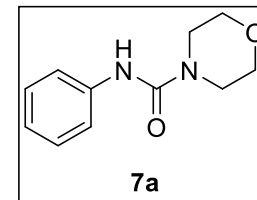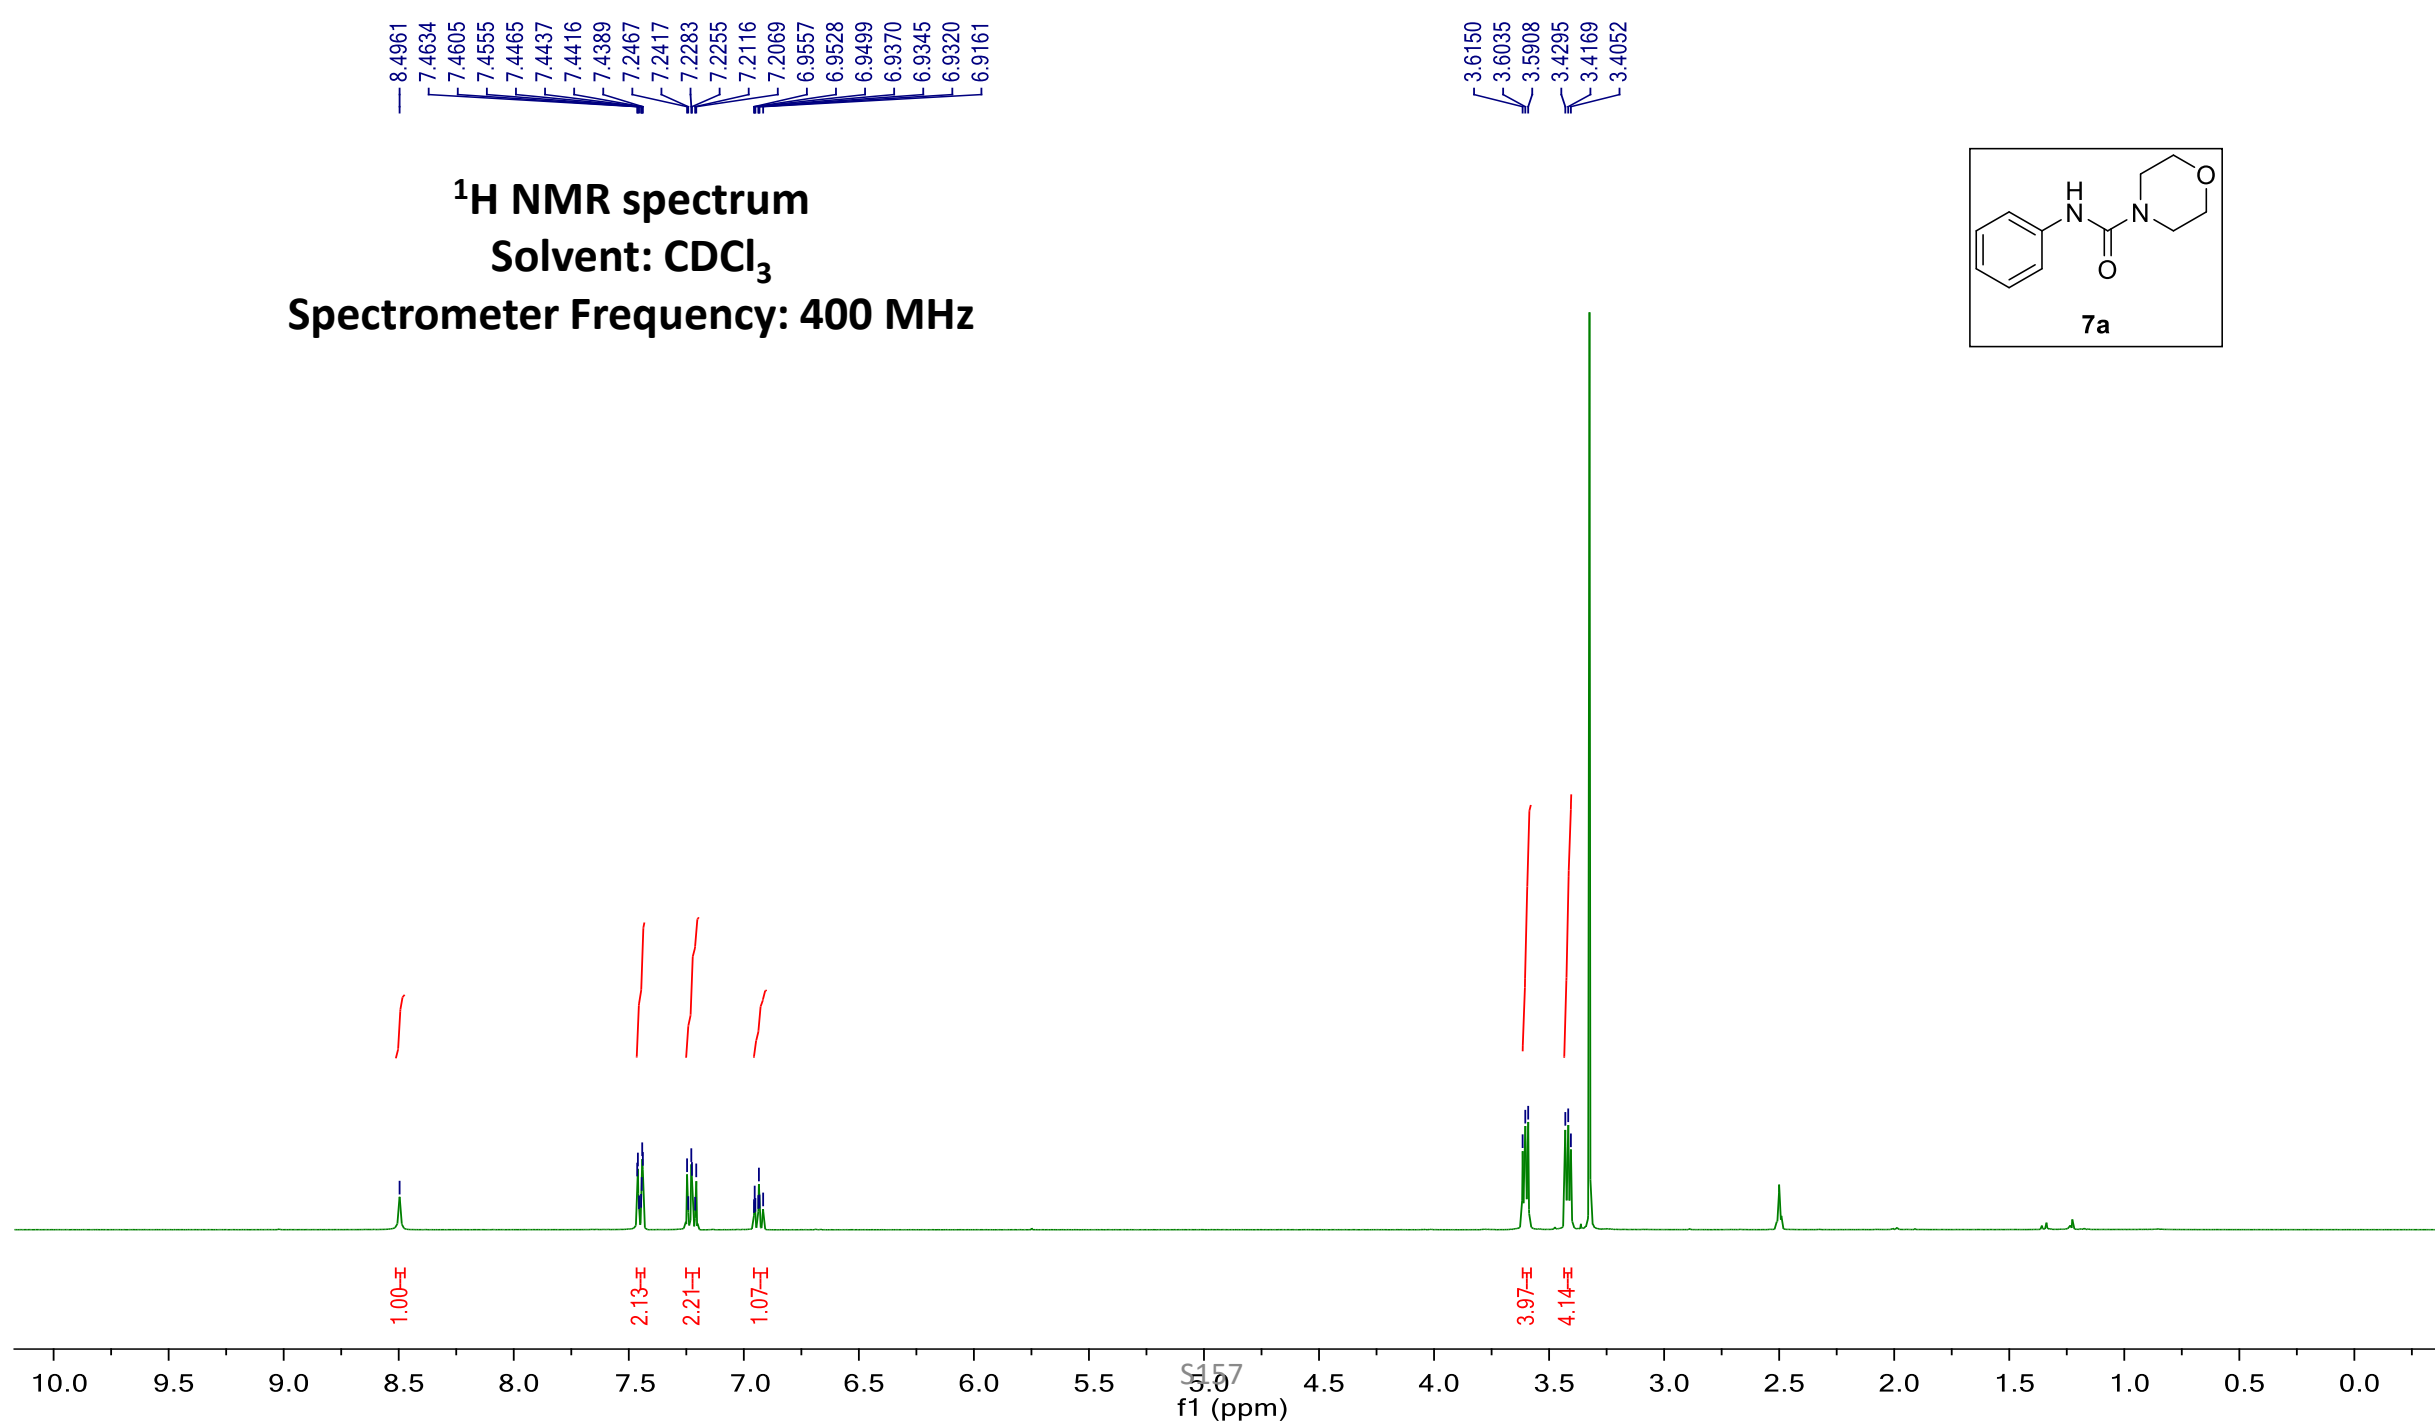

**$^{13}\text{C}$   $\{^1\text{H}\}$  NMR spectrum**  
**Solvent: DMSO- $d_6$**   
**Spectrometer Frequency: 100 MHz**

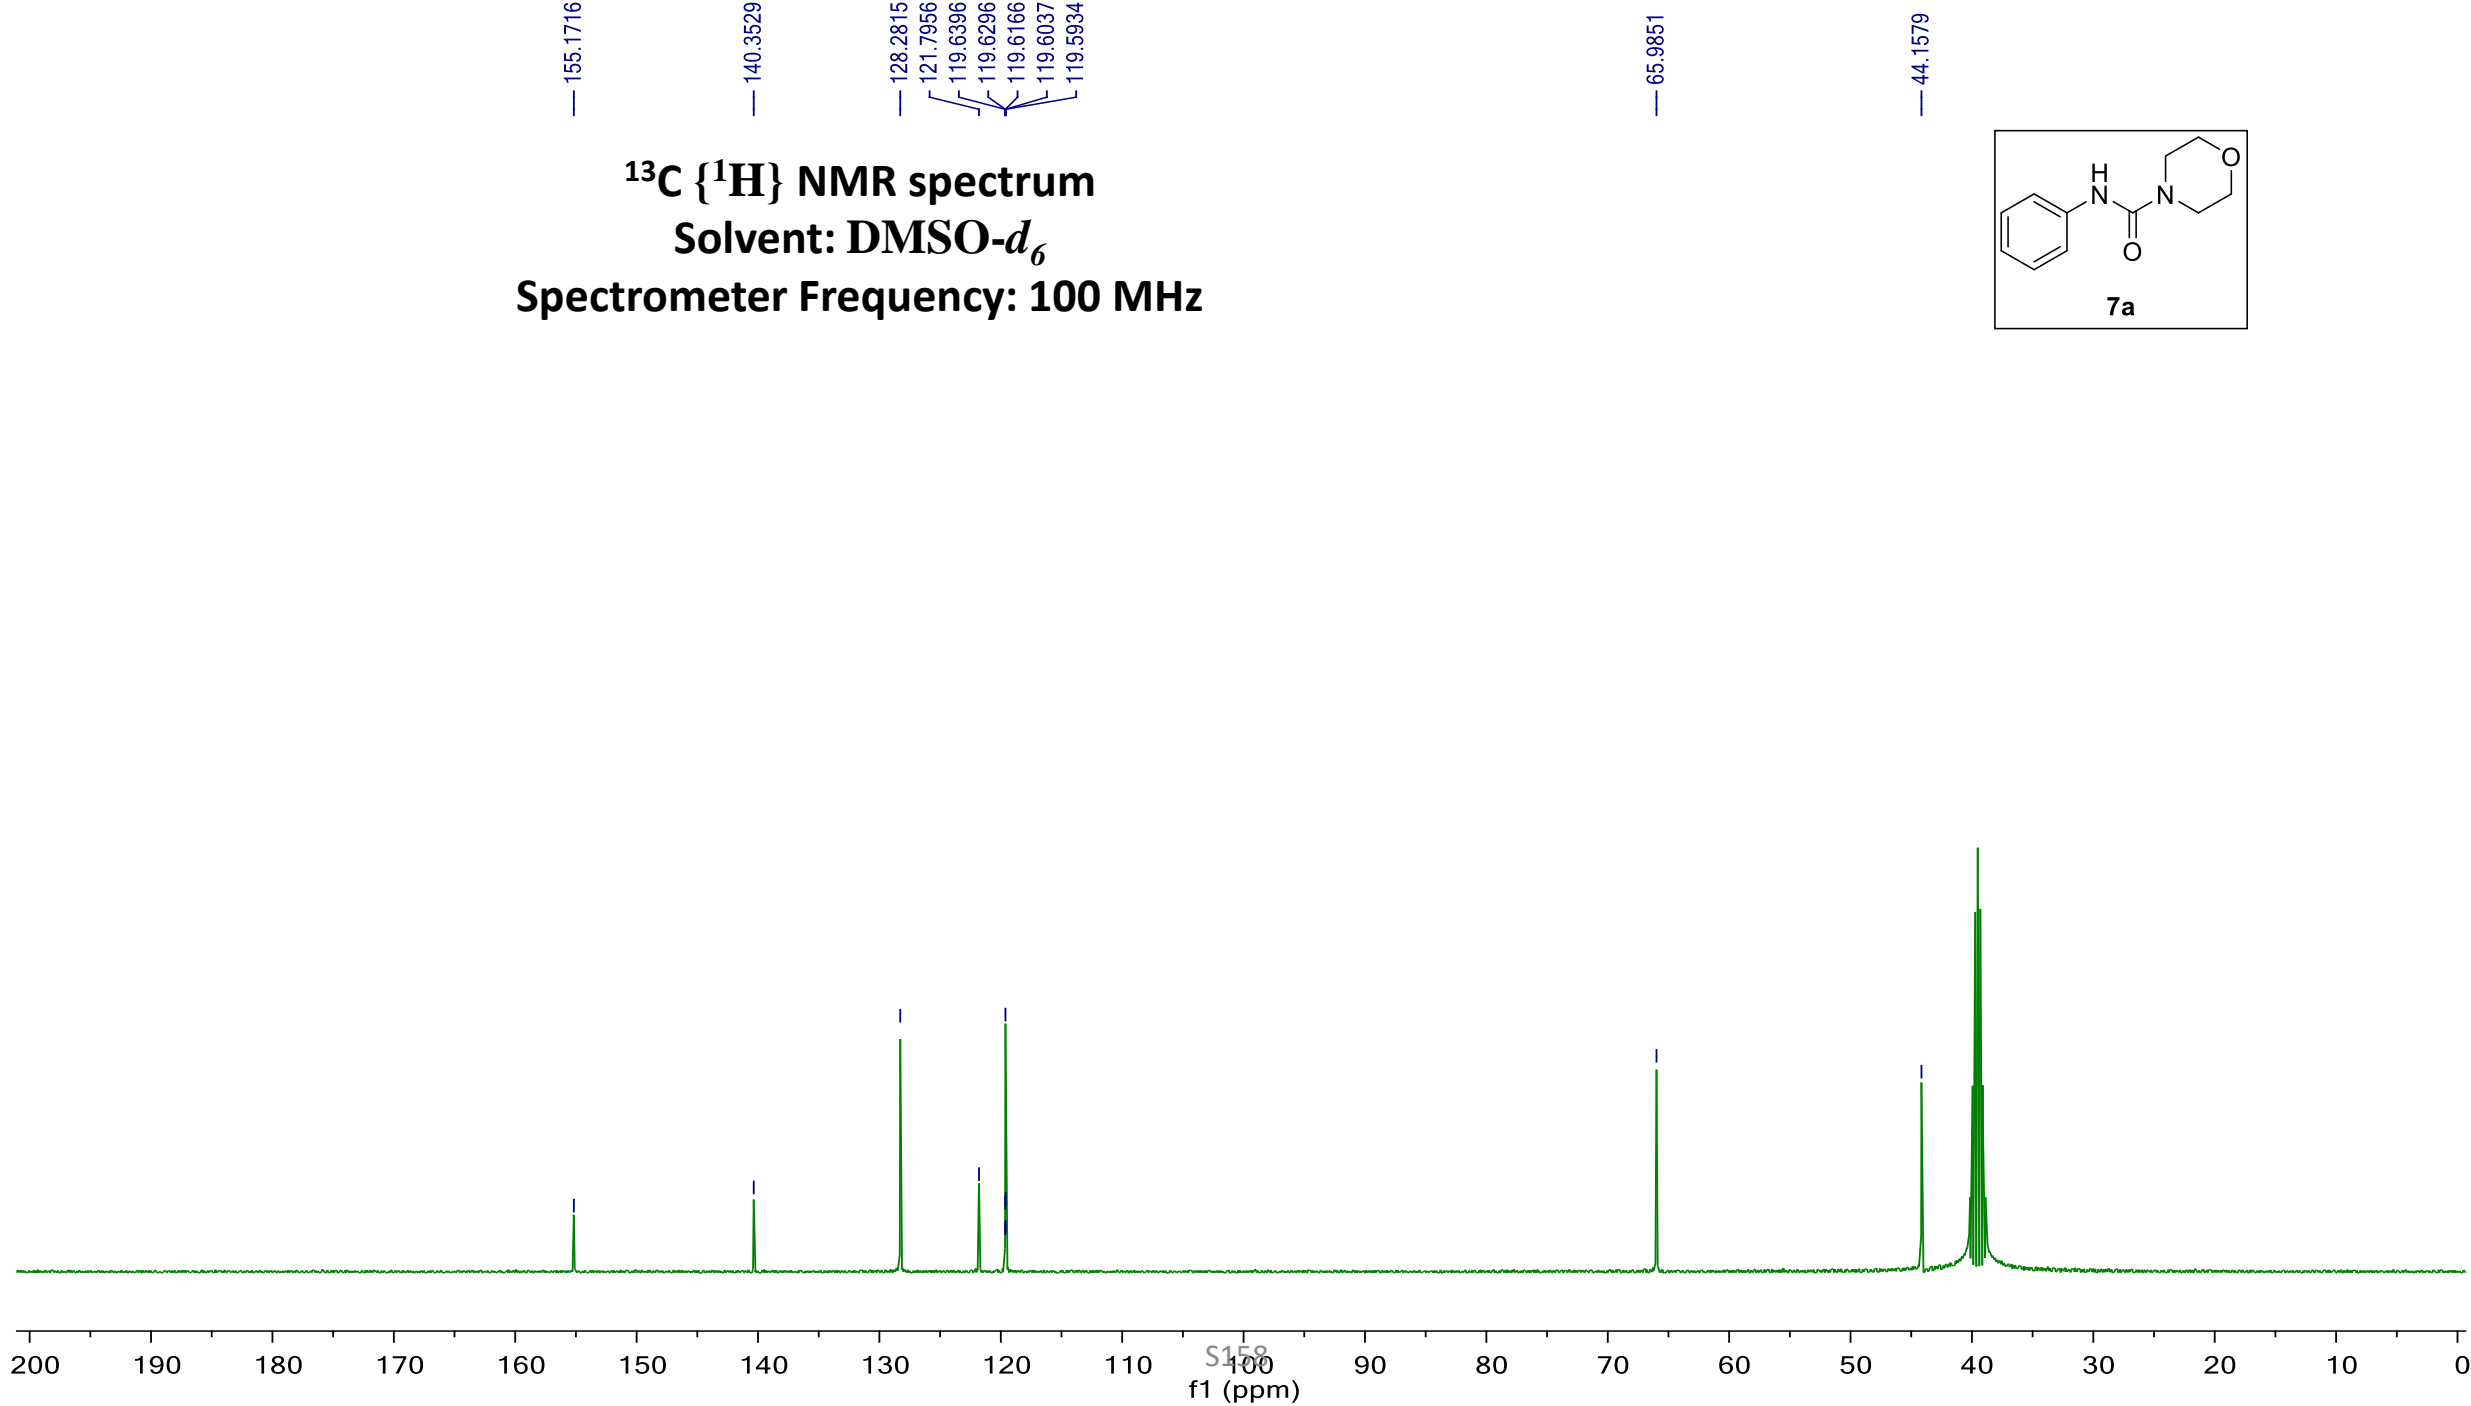

**$^1\text{H}$  NMR spectrum**  
**Solvent:  $\text{DMSO-}d_6$**   
**Spectrometer Frequency: 400 MHz**

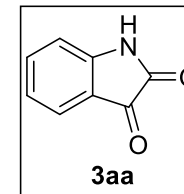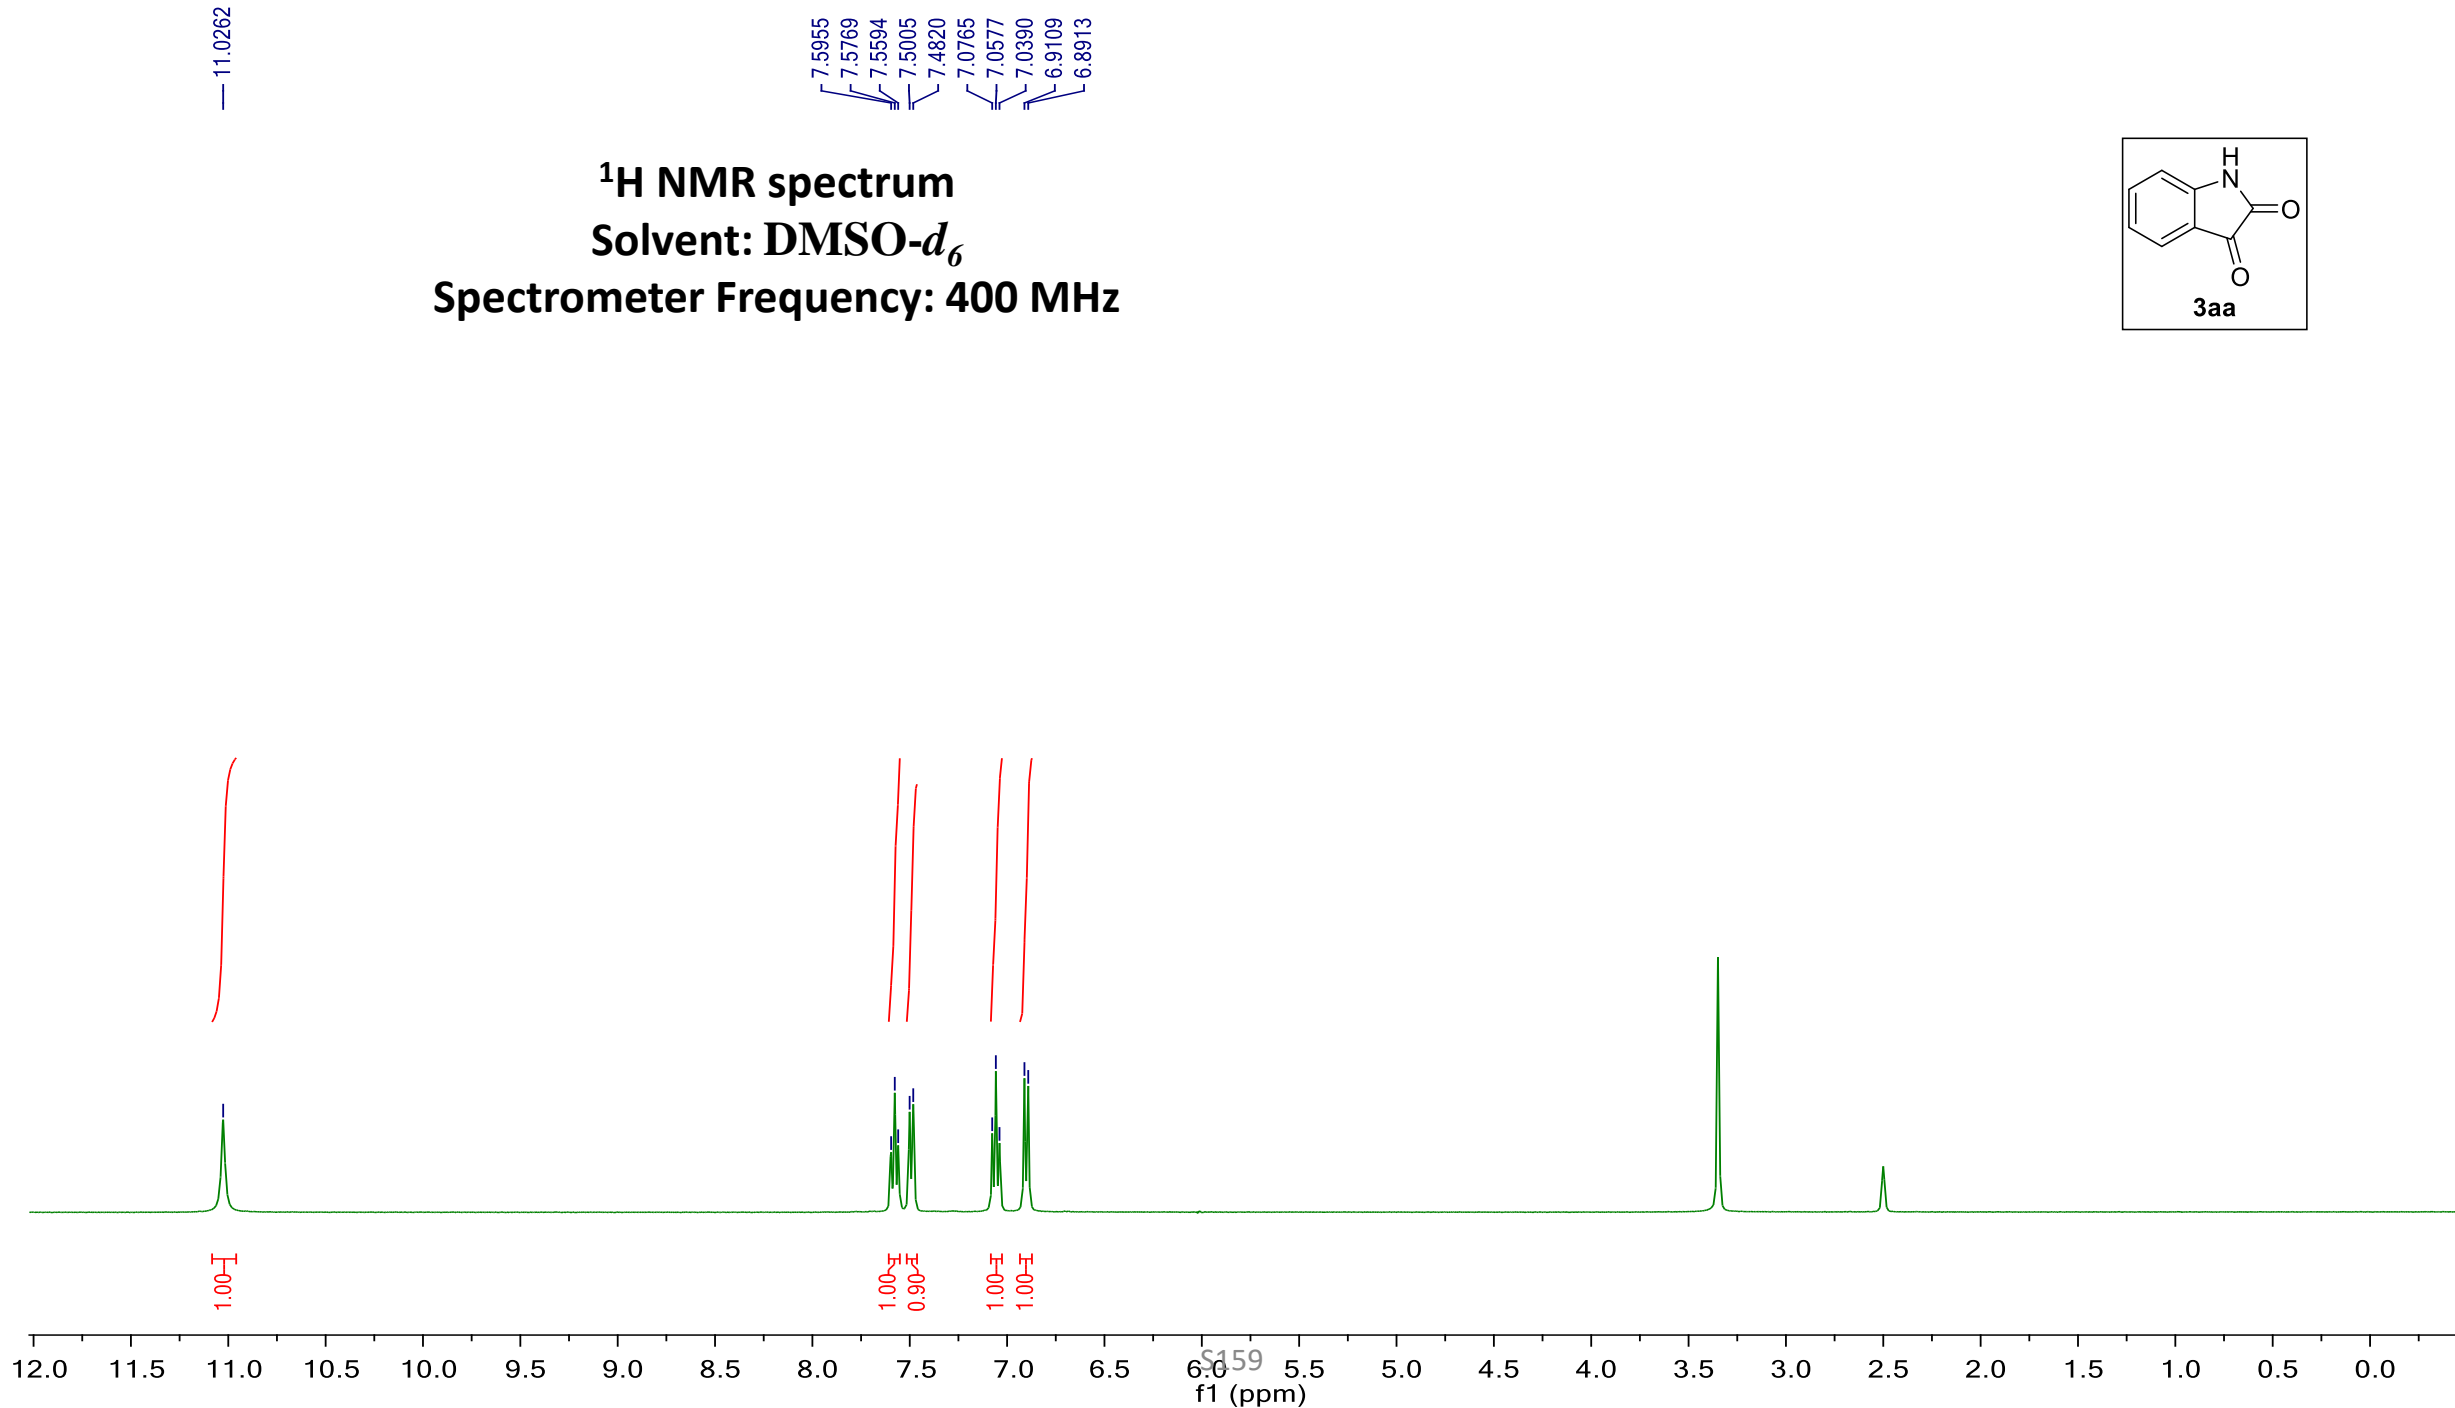

**$^{13}\text{C}$   $\{^1\text{H}\}$  NMR spectrum**  
**Solvent: DMSO- $d_6$**   
**Spectrometer Frequency: 100 MHz**

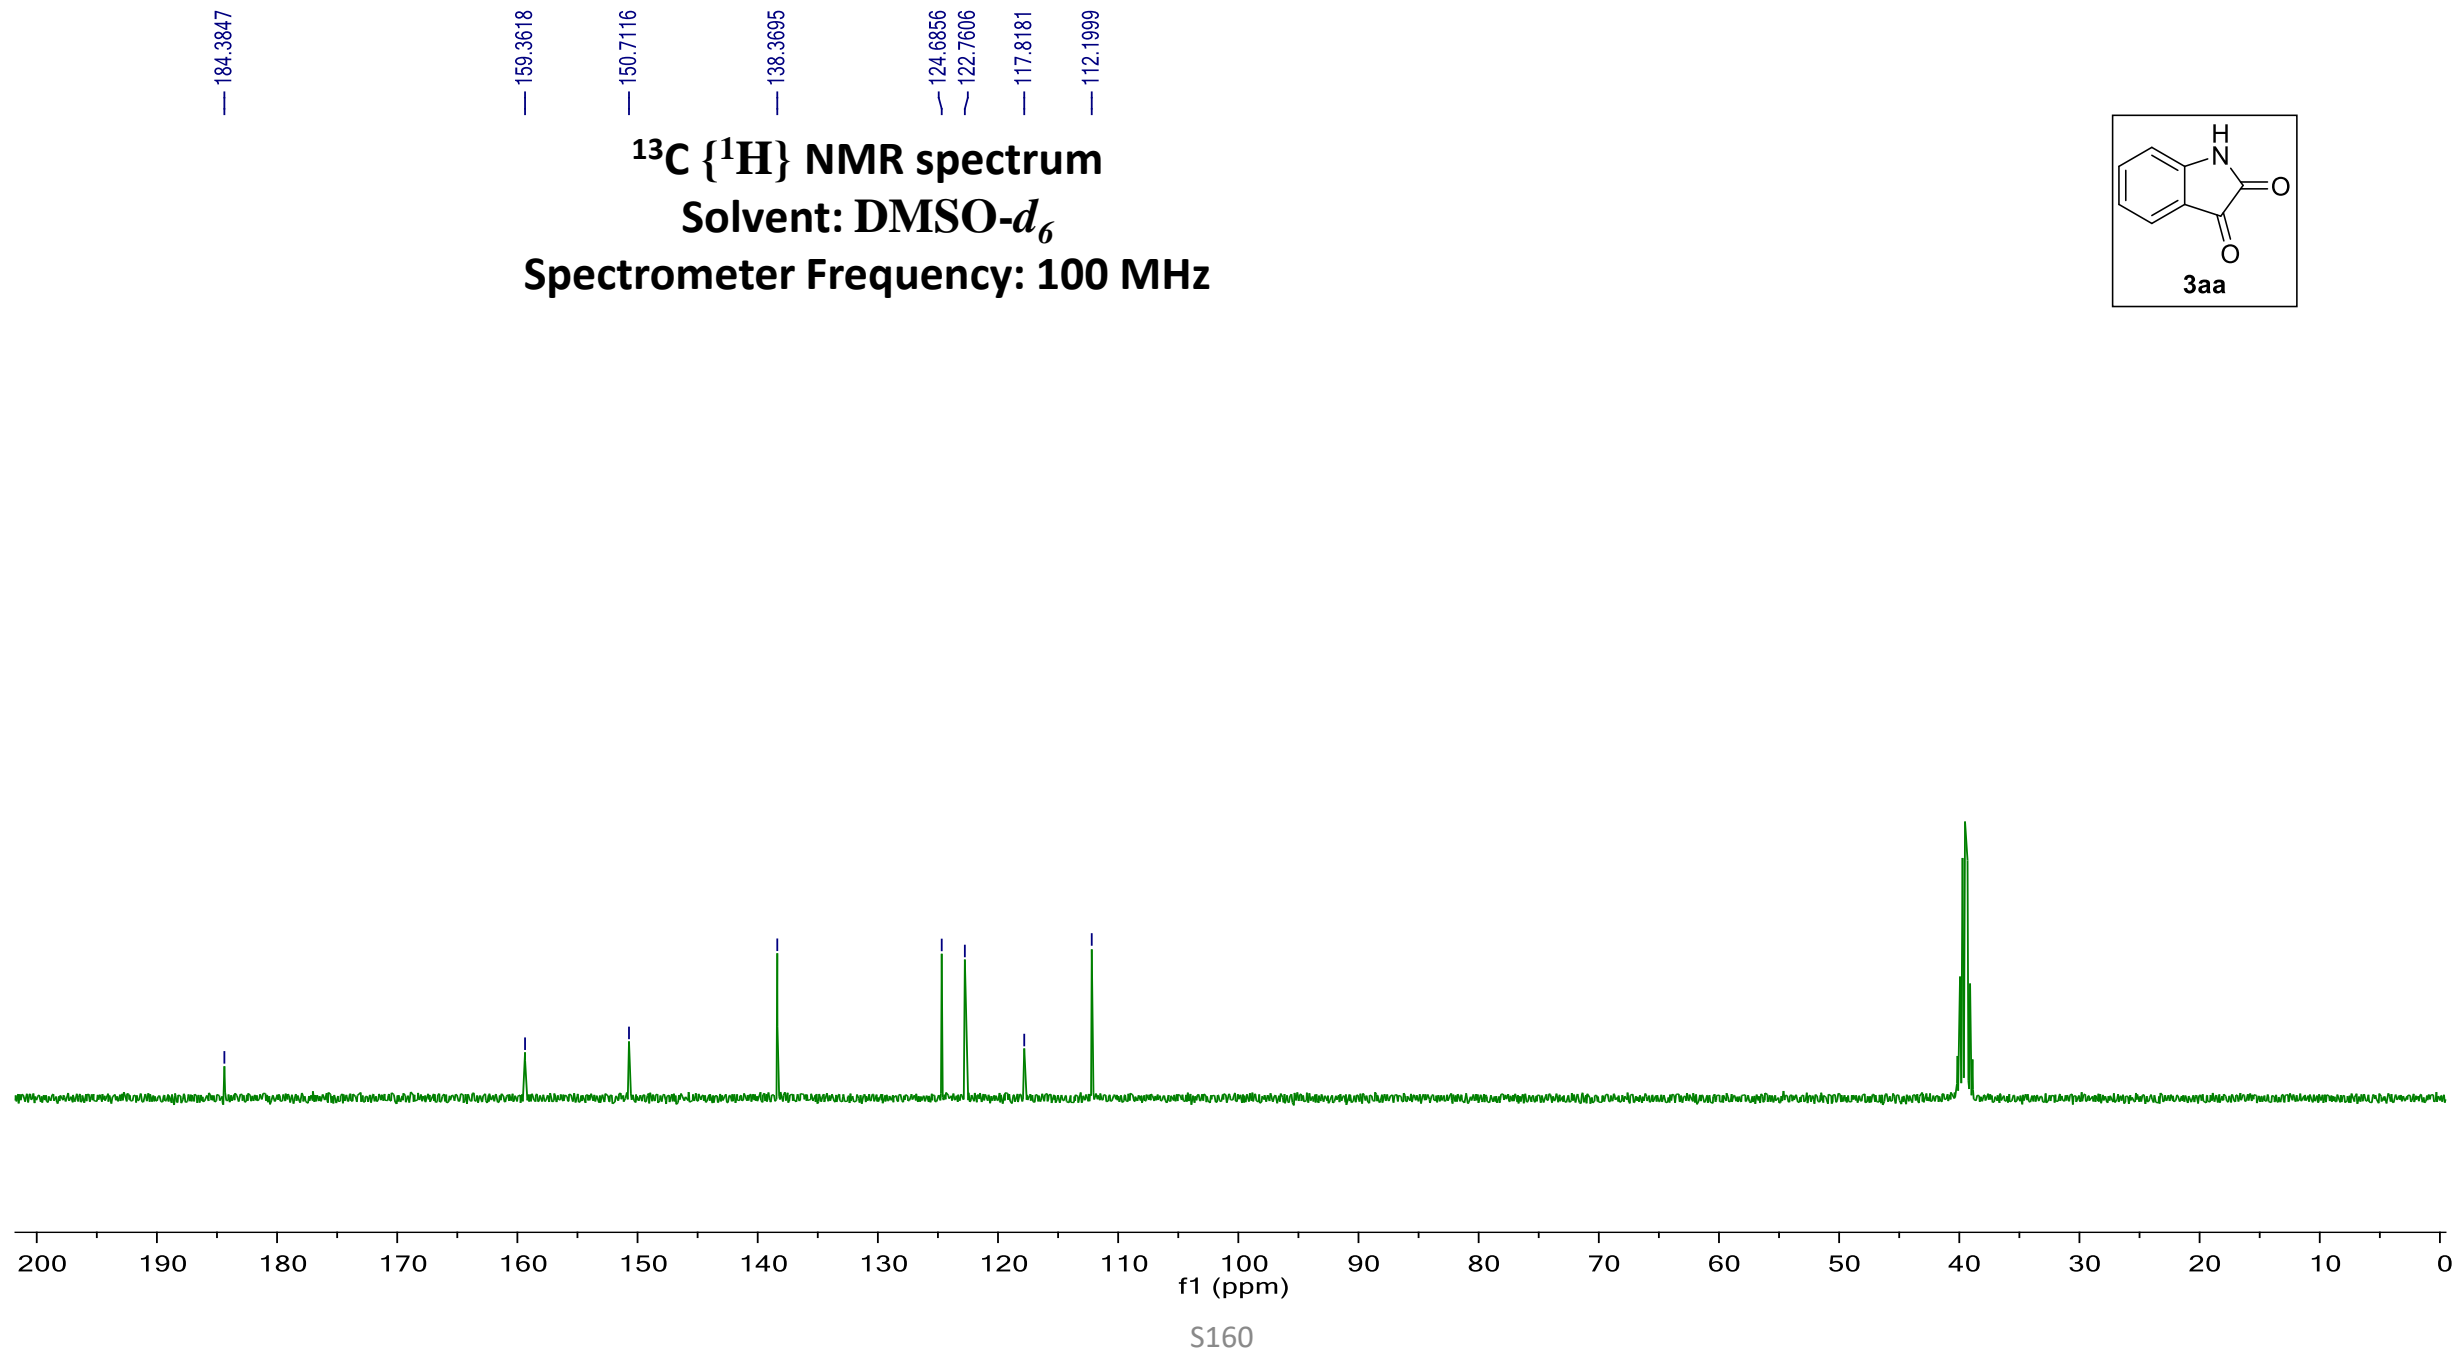

Supplement: d4cc00354c1.pdf [file d4cc00354c1.pdf]
